# Supplementary material
Source: PubMed Central journal article supplement (PMC9373148)
Supplement: jiac024_suppl_supplementary_material.pdf [file jiac024_suppl_supplementary_material.pdf]

**Pharmacogenetics of Between-Individual Variability in Plasma Clearance  
of Bedaquiline and Clofazimine**

**SUPPLEMENTAL ON-LINE MATERIAL**

[Table of Contents \(page\)](#)

***Table 1. PharmGKB polymorphisms considered in our analyses (n = 173). .....2***

***Table 2. Polymorphisms considered that were common to PharmGKB and GWAS Catalog (n = 33). .....2***

***Table 3. GWAS Catalog polymorphisms considered in our analyses (n = 89716).....2***

***Figure 1. Typical weekly average concentrations of bedaquiline and metabolite M2 over time by number of CYP3A5\*3 alleles. .... 171***

**Table 1. PharmGKB polymorphisms considered in our analyses (n = 173).**

|             |             |             |             |             |             |
|-------------|-------------|-------------|-------------|-------------|-------------|
| rs10306114  | rs118192168 | rs16960228  | rs193922832 | rs3812718   | rs72549303  |
| rs1042713   | rs118192170 | rs16969968  | rs193922843 | rs3832043   | rs72549309  |
| rs10455872  | rs118192172 | rs17782313  | rs193922876 | rs3918290   | rs7270101   |
| rs1045642   | rs118192175 | rs1799752   | rs193922878 | rs397508256 | rs7294      |
| rs1050828   | rs118192176 | rs1799930   | rs1954787   | rs397508288 | rs7297610   |
| rs1051266   | rs118192177 | rs1799971   | rs2011425   | rs397508442 | rs730012    |
| rs1051730   | rs118192178 | rs1800559   | rs202179988 | rs397508513 | rs7412      |
| rs1051740   | rs11881222  | rs1800566   | rs2032582   | rs397508537 | rs74503330  |
| rs1057910   | rs11971167  | rs1800629   | rs20455     | rs397508759 | rs74551128  |
| rs1076560   | rs121434568 | rs1801086   | rs2108622   | rs4149056   | rs75017182  |
| rs11045879  | rs121908752 | rs1801133   | rs2231142   | rs4444903   | rs75527207  |
| rs111888148 | rs121908753 | rs1801266   | rs2236857   | rs45445694  | rs75541969  |
| rs112445441 | rs121908755 | rs1801268   | rs2298383   | rs4673993   | rs77010898  |
| rs112563513 | rs121908757 | rs186045772 | rs2359612   | rs4680      | rs772226819 |
| rs1127354   | rs121909005 | rs193922525 | rs25487     | rs4713916   | rs776746    |
| rs113993958 | rs121909013 | rs193922747 | rs267606617 | rs489693    | rs77834169  |
| rs113993959 | rs121909020 | rs193922748 | rs267606618 | rs4917639   | rs77932196  |
| rs113993960 | rs121909041 | rs193922753 | rs267606619 | rs4961      | rs78060119  |
| rs115232898 | rs121918592 | rs193922762 | rs267606723 | rs510769    | rs78655421  |
| rs115545701 | rs121918593 | rs193922764 | rs2740574   | rs5219      | rs78769542  |
| rs11615     | rs121918594 | rs193922768 | rs2884737   | rs55886062  | rs7997012   |
| rs116855232 | rs121918595 | rs193922770 | rs28933396  | rs578776    | rs80282562  |
| rs118192116 | rs121918596 | rs193922772 | rs28933397  | rs6065      | rs8050894   |
| rs118192122 | rs12777823  | rs193922802 | rs3212986   | rs6295      | rs8099917   |
| rs118192124 | rs12979860  | rs193922803 | rs368234815 | rs63749869  | rs887829    |
| rs118192161 | rs141033578 | rs193922807 | rs368505753 | rs671       | rs924607    |
| rs118192162 | rs144336148 | rs193922809 | rs3745274   | rs67376798  | rs9923231   |
| rs118192163 | rs150212784 | rs193922816 | rs3753380   | rs678849    | rs9934438   |
| rs118192167 | rs1695      | rs193922818 | rs3766951   | rs71647871  |             |

**Table 2. Polymorphisms considered that were common to PharmGKB and GWAS Catalog (n = 33).**

|             |            |           |           |
|-------------|------------|-----------|-----------|
| rs10455872  | rs1695     | rs2231142 | rs776746  |
| rs1050828   | rs16969968 | rs4149056 | rs8050894 |
| rs1051730   | rs17782313 | rs4680    | rs8099917 |
| rs1057910   | rs1799971  | rs489693  | rs887829  |
| rs11045879  | rs1800566  | rs5219    | rs924607  |
| rs1127354   | rs1800629  | rs6065    | rs9923231 |
| rs116855232 | rs1801133  | rs671     |           |
| rs12777823  | rs2011425  | rs7270101 |           |
| rs12979860  | rs2108622  | rs7412    |           |

**Table 3. GWAS Catalog polymorphisms considered in our analyses (n = 89716).**

|            |            |            |            |            |            |            |            |
|------------|------------|------------|------------|------------|------------|------------|------------|
| rs1000005  | rs1000454  | rs10006327 | rs10009409 | rs10012307 | rs10014934 | rs10017305 | rs10019997 |
| rs1000010  | rs1000471  | rs10006495 | rs10009513 | rs10012347 | rs1001494  | rs10017573 | rs10020067 |
| rs10000284 | rs10005067 | rs10007186 | rs10009715 | rs10012624 | rs10015223 | rs1001761  | rs10020288 |
| rs10000513 | rs10005233 | rs10007270 | rs1000972  | rs10013456 | rs10015342 | rs1001817  | rs10020574 |
| rs1000096  | rs10005540 | rs1000778  | rs1001007  | rs10013495 | rs10015412 | rs10018951 | rs10021288 |
| rs10001365 | rs1000565  | rs10007915 | rs10010325 | rs10013613 | rs10015974 | rs10019169 | rs10021661 |
| rs10001545 | rs1000595  | rs10008032 | rs1001096  | rs10013696 | rs10016110 | rs10019221 | rs10021731 |
| rs10002111 | rs1000597  | rs10008637 | rs10011267 | rs10014175 | rs10016631 | rs10019234 | rs10021733 |
| rs1000368  | rs10006235 | rs10009128 | rs10011796 | rs1001441  | rs10016841 | rs10019396 | rs1002191  |
| rs10004020 | rs10006237 | rs10009397 | rs10011838 | rs10014469 | rs1001697  | rs10019888 | rs10021949 |
| rs10004195 | rs10006310 | rs1000940  | rs1001211  | rs10014552 | rs10017280 | rs1001989  | rs10022109 |

|            |            |            |            |            |            |            |            |
|------------|------------|------------|------------|------------|------------|------------|------------|
| rs1002226  | rs1003392  | rs10045431 | rs10057211 | rs10066168 | rs10077097 | rs10088627 | rs10099237 |
| rs10022462 | rs1003393  | rs1004548  | rs1005734  | rs10066170 | rs1007731  | rs10088702 | rs10099330 |
| rs10022648 | rs10034228 | rs10045497 | rs1005752  | rs10066409 | rs10077885 | rs10088725 | rs1009950  |
| rs10022937 | rs10034259 | rs10045508 | rs10057590 | rs10066412 | rs10078004 | rs10089263 | rs10099546 |
| rs1002311  | rs10034561 | rs10045577 | rs10057652 | rs10066420 | rs10078021 | rs10089406 | rs10099921 |
| rs10023310 | rs10034572 | rs10045962 | rs10057745 | rs10066469 | rs10078397 | rs10089517 | rs10100085 |
| rs10023335 | rs10034692 | rs10045971 | rs1005776  | rs10066524 | rs10078545 | rs10089933 | rs10100154 |
| rs10023464 | rs10034950 | rs10046069 | rs10057787 | rs1006660  | rs10078588 | rs1009017  | rs10100215 |
| rs10023470 | rs10035253 | rs10046853 | rs10057855 | rs10066711 | rs10078719 | rs10090382 | rs10100265 |
| rs10023685 | rs10035291 | rs10047462 | rs10058074 | rs10066955 | rs10078807 | rs10090449 | rs10100356 |
| rs10023962 | rs1003533  | rs10047474 | rs10058356 | rs10066990 | rs1007934  | rs10091038 | rs10100465 |
| rs1002436  | rs10035349 | rs1004763  | rs10058365 | rs1006705  | rs1007938  | rs1009110  | rs1010053  |
| rs1002487  | rs10035725 | rs1004787  | rs10058728 | rs10067113 | rs1007966  | rs10091130 | rs10100651 |
| rs10024899 | rs10035925 | rs10047928 | rs1005902  | rs10067280 | rs1008058  | rs10091344 | rs1010103  |
| rs1002504  | rs10036386 | rs10048061 | rs1005911  | rs1006737  | rs10080647 | rs1009136  | rs10101032 |
| rs1002519  | rs1003645  | rs1004807  | rs10059128 | rs10067451 | rs1008078  | rs10091374 | rs10101061 |
| rs1002607  | rs10036748 | rs10048146 | rs10059225 | rs1006749  | rs1008084  | rs1009181  | rs10101067 |
| rs10026163 | rs10036789 | rs10048173 | rs10059661 | rs10067798 | rs10080924 | rs10091870 | rs10101342 |
| rs10026360 | rs10037055 | rs10048219 | rs10059884 | rs10067881 | rs10081437 | rs1009188  | rs10101364 |
| rs10026457 | rs10037149 | rs10048404 | rs10059921 | rs10068110 | rs10081751 | rs10091910 | rs10102164 |
| rs1002655  | rs1003719  | rs10048529 | rs10059996 | rs10068422 | rs10081960 | rs10092549 | rs10102172 |
| rs1002656  | rs10037418 | rs1004870  | rs10060023 | rs10068613 | rs10081968 | rs10092723 | rs10102352 |
| rs1002658  | rs10037493 | rs10048736 | rs10060053 | rs10068637 | rs10082444 | rs10092747 | rs10102524 |
| rs10026884 | rs10037512 | rs10048743 | rs10060182 | rs10068717 | rs1008251  | rs10092965 | rs10102591 |
| rs10027182 | rs10037643 | rs10048745 | rs10060196 | rs10068787 | rs10083137 | rs10092988 | rs1010269  |
| rs10027275 | rs10037743 | rs10048834 | rs10060615 | rs10068807 | rs10083285 | rs10093110 | rs10102889 |
| rs10027347 | rs10038095 | rs10049088 | rs10060622 | rs1006893  | rs10083370 | rs10093547 | rs10103003 |
| rs10027407 | rs1003827  | rs10049390 | rs1006096  | rs1006923  | rs10083558 | rs1009358  | rs10103048 |
| rs10027415 | rs10038416 | rs1004941  | rs10061008 | rs10069504 | rs10083736 | rs1009360  | rs1010305  |
| rs10027492 | rs10039039 | rs10049413 | rs10061069 | rs10069554 | rs10083777 | rs10093796 | rs10103353 |
| rs1002774  | rs10039206 | rs10049761 | rs10061189 | rs10069648 | rs10083830 | rs1009404  | rs10103692 |
| rs10027926 | rs10039283 | rs10050061 | rs10061288 | rs10069690 | rs10083840 | rs10094382 | rs10103696 |
| rs10028187 | rs10040192 | rs10050470 | rs10061387 | rs1007000  | rs10084164 | rs10094574 | rs10103921 |
| rs10028213 | rs1004030  | rs1005133  | rs1006139  | rs10070064 | rs10084334 | rs10094579 | rs10104003 |
| rs10028756 | rs10040865 | rs10051330 | rs10061420 | rs1007027  | rs10084346 | rs10094645 | rs10104039 |
| rs10028805 | rs10040989 | rs1005165  | rs10061757 | rs10070734 | rs1008455  | rs10094691 | rs10104041 |
| rs10028954 | rs10041378 | rs10051722 | rs10061788 | rs1007122  | rs10084572 | rs1009470  | rs1010427  |
| rs10029005 | rs10041403 | rs10051765 | rs10061911 | rs10071491 | rs10085617 | rs10094779 | rs10104995 |
| rs10029218 | rs10041569 | rs10051787 | rs1006195  | rs10071507 | rs10085696 | rs10094872 | rs1010553  |
| rs10029254 | rs10041657 | rs10052000 | rs10062026 | rs10071514 | rs10085831 | rs10095003 | rs10105606 |
| rs10029476 | rs10041668 | rs10052424 | rs10062049 | rs10071595 | rs10085881 | rs10095135 | rs10105844 |
| rs10029799 | rs10041724 | rs10052591 | rs1006207  | rs10071838 | rs10085919 | rs10095380 | rs10106298 |
| rs10030035 | rs10041818 | rs10052657 | rs10062079 | rs1007204  | rs10086016 | rs10095395 | rs10106406 |
| rs10030217 | rs10041849 | rs10052710 | rs1006224  | rs10072221 | rs10086284 | rs10095724 | rs10106565 |
| rs10030552 | rs10042371 | rs1005277  | rs10062657 | rs10072364 | rs10086500 | rs10095930 | rs10106652 |
| rs10030755 | rs1004246  | rs10053502 | rs10062687 | rs10072750 | rs10086521 | rs10096191 | rs10107066 |
| rs1003080  | rs10042590 | rs100537   | rs10062757 | rs10073038 | rs10086568 | rs10096213 | rs10107145 |
| rs1003081  | rs10042827 | rs1005390  | rs1006296  | rs10073216 | rs10086569 | rs1009634  | rs10107182 |
| rs10031252 | rs10042828 | rs10054063 | rs1006298  | rs1007330  | rs10086797 | rs10096351 | rs10107533 |
| rs10031452 | rs10043040 | rs10054105 | rs10063055 | rs10073416 | rs10086908 | rs10096421 | rs10107630 |
| rs10031777 | rs10043077 | rs10054203 | rs10063294 | rs10073418 | rs10086956 | rs1009647  | rs10108150 |
| rs10031823 | rs10043238 | rs1005421  | rs10063334 | rs10073495 | rs10087081 | rs10096511 | rs10108398 |
| rs10032216 | rs10043722 | rs10054327 | rs10063353 | rs1007358  | rs1008723  | rs10096633 | rs10108511 |
| rs10032297 | rs10043829 | rs10054375 | rs10063365 | rs1007365  | rs10087240 | rs10096777 | rs10108684 |
| rs10032549 | rs10043984 | rs1005502  | rs10063744 | rs1007392  | rs10087241 | rs10096794 | rs10108980 |
| rs10032729 | rs10044001 | rs10055042 | rs1006409  | rs10074178 | rs10087341 | rs10096972 | rs10109012 |
| rs10032922 | rs10044122 | rs10055091 | rs10064391 | rs10074523 | rs10087422 | rs10097617 | rs10109025 |
| rs10032941 | rs10044136 | rs1005522  | rs10064431 | rs10074991 | rs10087637 | rs10097917 | rs10109370 |
| rs10033073 | rs10044158 | rs10055352 | rs10065018 | rs10075570 | rs10087782 | rs10097964 | rs10109400 |
| rs10033119 | rs1004446  | rs10055396 | rs10065159 | rs10075612 | rs10087900 | rs10098073 | rs10109414 |
| rs10033366 | rs10044479 | rs1005585  | rs10065321 | rs10075764 | rs10088006 | rs10098103 | rs10109417 |
| rs1003342  | rs10044618 | rs10056243 | rs10065322 | rs10075801 | rs1008805  | rs10098310 | rs10109509 |
| rs10033455 | rs1004467  | rs10056247 | rs1006548  | rs10076436 | rs10088133 | rs10098488 | rs10109552 |
| rs10033464 | rs10045126 | rs10056340 | rs10065531 | rs10076557 | rs10088136 | rs10098664 | rs10109566 |
| rs1003370  | rs1004531  | rs1005636  | rs10065637 | rs10076602 | rs1008815  | rs10098778 | rs1011018  |
| rs10033769 | rs10045403 | rs1005714  | rs10065639 | rs10076701 | rs10088218 | rs1009908  | rs10110261 |
| rs10033900 | rs10045420 | rs10057188 | rs10065892 | rs10076782 | rs1008833  | rs10099100 | rs10110456 |

|             |            |             |            |            |            |            |            |
|-------------|------------|-------------|------------|------------|------------|------------|------------|
| rs10110562  | rs1012089  | rs10132060  | rs10145154 | rs1015511  | rs10165653 | rs10174214 | rs10181656 |
| rs10110581  | rs10120915 | rs1013209   | rs10145277 | rs10155132 | rs10165767 | rs10174238 | rs10182056 |
| rs1011063   | rs10121150 | rs10132160  | rs10145299 | rs1015519  | rs10165846 | rs10174253 | rs10182181 |
| rs10110651  | rs10121164 | rs10132280  | rs1014530  | rs1015538  | rs10165862 | rs10174328 | rs10182296 |
| rs10110699  | rs10121511 | rs10132476  | rs10145335 | rs10155855 | rs10165883 | rs10174398 | rs10182307 |
| rs1011082   | rs1012167  | rs10132779  | rs10145469 | rs10155941 | rs10166054 | rs10174570 | rs1018234  |
| rs1011121   | rs10121673 | rs1013278   | rs10145520 | rs10156310 | rs10166286 | rs10174652 | rs10182458 |
| rs10111413  | rs1012177  | rs10133279  | rs10145592 | rs10156356 | rs10166377 | rs10174860 | rs10182651 |
| rs1011157   | rs10122081 | rs10133551  | rs10145644 | rs10156548 | rs10166552 | rs1017494  | rs10182825 |
| rs1011167   | rs10122329 | rs10134381  | rs1014607  | rs10156565 | rs10166647 | rs10174949 | rs10183150 |
| rs10111937  | rs10122495 | rs10134446  | rs10146582 | rs10156578 | rs1016678  | rs10175070 | rs1018326  |
| rs10112240  | rs10122541 | rs10134589  | rs10146637 | rs10156597 | rs1016680  | rs1017529  | rs10183486 |
| rs10112386  | rs10122669 | rs10135205  | rs10146757 | rs10156602 | rs10166942 | rs10175405 | rs1018392  |
| rs1011254   | rs10122788 | rs10135681  | rs10146962 | rs10157166 | rs10167279 | rs1017545  | rs10184004 |
| rs10112574  | rs10122824 | rs1013579   | rs10146997 | rs10157197 | rs10167431 | rs10175462 | rs10184246 |
| rs10112594  | rs10122943 | rs10136330  | rs10147094 | rs10157379 | rs10167839 | rs10175478 | rs10184268 |
| rs1011267   | rs10122976 | rs10136360  | rs10147464 | rs10157710 | rs10167914 | rs10175680 | rs10184428 |
| rs10113066  | rs10122990 | rs10136383  | rs10147522 | rs10157941 | rs10168169 | rs10175706 | rs1018454  |
| rs10113215  | rs1012306  | rs10136545  | rs10147849 | rs10158347 | rs10168190 | rs10175798 | rs10184550 |
| rs1011339   | rs10123368 | rs10136766  | rs10147938 | rs10158467 | rs10168266 | rs10175975 | rs10184839 |
| rs1011386   | rs10123382 | rs10136790  | rs10147992 | rs10158537 | rs10168349 | rs10176110 | rs10184849 |
| rs1011392   | rs10123393 | rs10136987  | rs10148309 | rs10158878 | rs10168452 | rs10176176 | rs1018493  |
| rs10114066  | rs10123584 | rs10137191  | rs10148571 | rs10158937 | rs10168523 | rs10176391 | rs10184962 |
| rs1011407   | rs1012383  | rs10137343  | rs10148671 | rs10159026 | rs10168771 | rs10176525 | rs10185010 |
| rs1011408   | rs10124307 | rs1013737   | rs10148930 | rs10159255 | rs10168795 | rs10176600 | rs10185019 |
| rs1011416   | rs10124621 | rs10137475  | rs10149229 | rs10159261 | rs10168801 | rs10176901 | rs10185028 |
| rs10114314  | rs10125137 | rs10137488  | rs10149354 | rs10159477 | rs1016883  | rs1017698  | rs10185143 |
| rs10114341  | rs1012515  | rs10137527  | rs10149407 | rs10159676 | rs10168931 | rs10176996 | rs10185199 |
| rs10114423  | rs10125463 | rs101379339 | rs10149448 | rs10159712 | rs10169002 | rs10177080 | rs10185305 |
| rs1011468   | rs10125515 | 8           | rs10149470 | rs10160101 | rs10169133 | rs10177093 | rs10185424 |
| rs10114763  | rs10125715 | rs10138752  | rs10149699 | rs1016013  | rs10169459 | rs10177191 | rs10185460 |
| rs10115292  | rs10125961 | rs10138911  | rs1014971  | rs10160292 | rs10169561 | rs1017730  | rs10185725 |
| rs101155903 | rs10127497 | rs10139058  | rs10149871 | rs10160382 | rs10169594 | rs10177451 | rs10185853 |
| 6           | rs10127720 | rs1013910   | rs1014988  | rs10160510 | rs10169613 | rs10177638 | rs1018597  |
| rs10115920  | rs10127775 | rs10139154  | rs1015022  | rs10160596 | rs1016988  | rs10178069 | rs10186791 |
| rs10116186  | rs10127790 | rs10139432  | rs10150332 | rs10160758 | rs10169916 | rs10178094 | rs10186876 |
| rs10116353  | rs10127852 | rs10139548  | rs1015053  | rs10160769 | rs10170108 | rs10178115 | rs10186921 |
| rs10116379  | rs10127863 | rs10139550  | rs10150590 | rs10161336 | rs10170266 | rs10178381 | rs10186950 |
| rs10116426  | rs1012793  | rs10139745  | rs10150698 | rs1016144  | rs10170665 | rs10178409 | rs10187101 |
| rs10116772  | rs10128711 | rs10139750  | rs10151436 | rs10161520 | rs10171206 | rs1017875  | rs10187103 |
| rs1011685   | rs10128753 | rs10139768  | rs1015149  | rs1016162  | rs10171320 | rs10178845 | rs10187276 |
| rs10116891  | rs10128757 | rs1013982   | rs1015164  | rs10161679 | rs10171438 | rs10178992 | rs10187371 |
| rs10116955  | rs10128781 | rs1013987   | rs1015166  | rs10161821 | rs10171620 | rs10179086 | rs10187424 |
| rs10117057  | rs10128888 | rs10140010  | rs10151945 | rs10162202 | rs1017168  | rs10179091 | rs10187501 |
| rs10117184  | rs10128898 | rs10140566  | rs1015213  | rs10162287 | rs10171849 | rs10179158 | rs10187560 |
| rs1011731   | rs10128951 | rs10140668  | rs10152230 | rs10162376 | rs10171980 | rs10179584 | rs10188036 |
| rs10117466  | rs1012899  | rs10140922  | rs10152300 | rs10162508 | rs10172053 | rs10179592 | rs10188070 |
| rs10117672  | rs10129035 | rs10141031  | rs10152428 | rs10162525 | rs10172121 | rs10179654 | rs10188078 |
| rs10117687  | rs10129414 | rs1014146   | rs10152471 | rs10162642 | rs10172181 | rs10179705 | rs10188118 |
| rs10118357  | rs10129426 | rs10141786  | rs10152514 | rs10162687 | rs10172196 | rs10179773 | rs1018812  |
| rs10118552  | rs10129429 | rs10142337  | rs10152518 | rs1016343  | rs1017226  | rs10179874 | rs10188217 |
| rs10119     | rs10129516 | rs10142359  | rs10152552 | rs10163854 | rs10172295 | rs10180020 | rs1018827  |
| rs1011903   | rs10130556 | rs10142466  | rs10152591 | rs10164099 | rs10172309 | rs10180282 | rs10188334 |
| rs10119187  | rs10130576 | rs10142607  | rs10152593 | rs10164193 | rs10172311 | rs10180284 | rs1018846  |
| rs1011939   | rs10130587 | rs1014283   | rs10152595 | rs10164395 | rs10172544 | rs10180371 | rs10189015 |
| rs10119430  | rs10130783 | rs10142836  | rs10152831 | rs1016447  | rs10172650 | rs10180416 | rs10189186 |
| rs10119582  | rs10131032 | rs1014286   | rs10153304 | rs10164550 | rs10172678 | rs10180461 | rs10189434 |
| rs1011970   | rs10131105 | rs1014290   | rs10153315 | rs10164769 | rs10173115 | rs10180704 | rs10189479 |
| rs10119773  | rs10131197 | rs10143198  | rs10153796 | rs10164806 | rs10173269 | rs10180713 | rs10189498 |
| rs10119967  | rs10131290 | rs10144261  | rs10153800 | rs10164820 | rs10173355 | rs10180960 | rs10189629 |
| rs10120219  | rs10131337 | rs10144321  | rs10153926 | rs10164853 | rs10173412 | rs10181042 | rs10189682 |
| rs10120333  | rs10131490 | rs10144381  | rs1015438  | rs10165093 | rs10173487 | rs10181071 | rs10189761 |
| rs1012053   | rs10131519 | rs1014444   | rs1015446  | rs10165200 | rs10173522 | rs10181342 | rs10189857 |
| rs1012068   | rs10131567 | rs10144845  | rs1015451  | rs10165224 | rs10173538 | rs10181411 | rs10189912 |
| rs10120688  | rs10131894 | rs1014486   | rs1015456  | rs10165255 | rs10173945 | rs1018148  | rs10190053 |
| rs10120794  | rs10132018 | rs1014498   | rs10154700 | rs10165324 | rs10174    | rs10181515 | rs10190016 |
| rs10120859  | rs10132033 | rs10145146  | rs10154834 | rs1016565  | rs10174206 | rs1018154  | rs10190249 |

|            |            |            |            |             |            |            |            |
|------------|------------|------------|------------|-------------|------------|------------|------------|
| rs10190431 | rs10198124 | rs1020661  | rs10214796 | rs102274599 | rs10238767 | rs10252734 | rs10264573 |
| rs1019068  | rs10198127 | rs10206657 | rs10214930 | 4           | rs10238953 | rs10252771 | rs10264590 |
| rs10190777 | rs10198275 | rs10206899 | rs10214981 | rs102275    | rs10239000 | rs10253161 | rs10265001 |
| rs10190845 | rs10198345 | rs10206992 | rs10215015 | rs10227959  | rs10239419 | rs10253506 | rs10265057 |
| rs10190879 | rs10198423 | rs10206999 | rs10215082 | rs10228066  | rs10239787 | rs10253861 | rs10265116 |
| rs10191360 | rs10198459 | rs1020731  | rs1021509  | rs10228276  | rs10239980 | rs1025395  | rs10265133 |
| rs10191401 | rs10198628 | rs10207392 | rs10215153 | rs10228350  | rs10240199 | rs10254050 | rs10265169 |
| rs10191477 | rs10198683 | rs10207567 | rs10215367 | rs10228450  | rs1024091  | rs10254101 | rs10265221 |
| rs10191483 | rs10198772 | rs10207670 | rs10215854 | rs10228456  | rs10240931 | rs10254118 | rs10265538 |
| rs10191559 | rs10198822 | rs10207679 | rs10216051 | rs10228486  | rs10241173 | rs10254125 | rs10266287 |
| rs10191758 | rs10198948 | rs10207726 | rs10216063 | rs10228494  | rs1024161  | rs10254284 | rs10266424 |
| rs10191849 | rs10199082 | rs10208    | rs10217586 | rs10228796  | rs10242100 | rs10254729 | rs10266620 |
| rs10191970 | rs10199109 | rs10208088 | rs10217651 | rs10228836  | rs10242223 | rs10254825 | rs10267100 |
| rs1019203  | rs1019914  | rs10208098 | rs10217747 | rs10229142  | rs10242233 | rs10255004 | rs1026721  |
| rs1019204  | rs10199437 | rs10208141 | rs10217797 | rs10229224  | rs10242455 | rs10255299 | rs10267346 |
| rs10192049 | rs10199487 | rs10208158 | rs10218066 | rs10229583  | rs10242567 | rs10255402 | rs1026752  |
| rs10192119 | rs10199493 | rs10208293 | rs10218285 | rs10230207  | rs1024268  | rs1025549  | rs10267576 |
| rs10192149 | rs10199605 | rs10208649 | rs10218452 | rs10230506  | rs10242758 | rs10255516 | rs10267578 |
| rs10192369 | rs10199672 | rs10208700 | rs10218528 | rs10230696  | rs10242866 | rs10255837 | rs10267593 |
| rs10192375 | rs10199768 | rs10208712 | rs10218590 | rs10230723  | rs10243181 | rs10255839 | rs10267979 |
| rs10192454 | rs10199914 | rs10208720 | rs10218712 | rs10230872  | rs1024323  | rs1025601  | rs10268372 |
| rs10192562 | rs10200159 | rs10208769 | rs10218741 | rs10230941  | rs10243279 | rs10256359 | rs10268683 |
| rs10192634 | rs10200279 | rs10208807 | rs10218792 | rs10231021  | rs10243434 | rs1025686  | rs1026872  |
| rs10192669 | rs10200533 | rs10209020 | rs10218811 | rs10231365  | rs10243591 | rs1025687  | rs10268735 |
| rs10192834 | rs10200566 | rs10209110 | rs10218999 | rs10231372  | rs10243593 | rs1025688  | rs10269139 |
| rs10193032 | rs10201159 | rs10209131 | rs10219187 | rs10231759  | rs1024374  | rs10257135 | rs1026914  |
| rs10193098 | rs1020120  | rs10209140 | rs1021938  | rs1023193   | rs10244093 | rs10257273 | rs1026916  |
| rs10193121 | rs10201766 | rs10209172 | rs10220411 | rs10231941  | rs10244184 | rs10257539 | rs10269774 |
| rs10193235 | rs10201872 | rs10209325 | rs10220751 | rs10232036  | rs10244364 | rs10258340 | rs10269783 |
| rs10193431 | rs10201883 | rs10209330 | rs10221156 | rs10232074  | rs10244416 | rs10258482 | rs1026997  |
| rs1019348  | rs10202148 | rs1020992  | rs10221267 | rs10232172  | rs10244956 | rs10258656 | rs10270358 |
| rs10193498 | rs10202379 | rs10210063 | rs10221329 | rs10232276  | rs10245353 | rs10259316 | rs10270359 |
| rs10193517 | rs10202535 | rs10210302 | rs10221412 | rs10232243  | rs10245472 | rs10259338 | rs10270542 |
| rs10193538 | rs10202630 | rs10210351 | rs10221473 | rs1023252   | rs10245642 | rs10259354 | rs10270615 |
| rs10193543 | rs10202675 | rs10210385 | rs10221489 | rs10233003  | rs10245696 | rs10259477 | rs10270826 |
| rs10193706 | rs10202701 | rs10210513 | rs10221508 | rs10233018  | rs1024582  | rs10259620 | rs10270950 |
| rs10193722 | rs10202845 | rs1021056  | rs10221742 | rs10233127  | rs10245867 | rs10259649 | rs10271373 |
| rs10193877 | rs10202963 | rs10210652 | rs10221808 | rs1023330   | rs10246303 | rs10259715 | rs10271455 |
| rs10194211 | rs10203008 | rs1021071  | rs10221933 | rs10233430  | rs10246939 | rs10259796 | rs10271999 |
| rs10194635 | rs10203122 | rs10210955 | rs1022261  | rs10233569  | rs10247993 | rs10260049 | rs10272002 |
| rs10194817 | rs10203174 | rs10210970 | rs10223052 | rs10233848  | rs10248298 | rs10260148 | rs10272006 |
| rs10195252 | rs10203386 | rs10211032 | rs10223255 | rs10234366  | rs10248619 | rs10260177 | rs10272546 |
| rs10195263 | rs10203477 | rs10211038 | rs10223451 | rs10234796  | rs10248878 | rs10260281 | rs10272859 |
| rs10195357 | rs10203482 | rs10211296 | rs10223666 | rs1023480   | rs1024905  | rs10260511 | rs10272990 |
| rs10195713 | rs10203711 | rs10211312 | rs1022376  | rs10234816  | rs10249167 | rs10260606 | rs10273103 |
| rs1019612  | rs10203731 | rs10211373 | rs10224002 | rs1023497   | rs10249294 | rs10260816 | rs10273229 |
| rs10196283 | rs10203824 | rs10211501 | rs10224210 | rs1023500   | rs1024943  | rs10261050 | rs1027341  |
| rs10196304 | rs10203838 | rs10211524 | rs1022431  | rs10235162  | rs1024948  | rs10261098 | rs10273635 |
| rs1019643  | rs10204    | rs10211550 | rs1022463  | rs1023518   | rs10249651 | rs10261246 | rs10273639 |
| rs10196493 | rs10204051 | rs1021156  | rs10224902 | rs10235444  | rs1024975  | rs1026149  | rs10273974 |
| rs10196515 | rs10204104 | rs10211774 | rs10225173 | rs1023572   | rs10249754 | rs10261515 | rs10274    |
| rs10196674 | rs10204230 | rs1021188  | rs10225221 | rs10235789  | rs10250    | rs10261857 | rs10274279 |
| rs1019670  | rs10204405 | rs10212007 | rs10225279 | rs10236149  | rs10250582 | rs10261878 | rs10274393 |
| rs10196726 | rs10204454 | rs1021205  | rs1022528  | rs10236197  | rs10250602 | rs1026196  | rs10274553 |
| rs10196799 | rs1020446  | rs10212257 | rs10225320 | rs10236314  | rs10250729 | rs10261971 | rs10274928 |
| rs10196867 | rs10204673 | rs10212419 | rs10225965 | rs10236569  | rs10251192 | rs10262104 | rs10274968 |
| rs10196909 | rs10204824 | rs10212439 | rs10226084 | rs1023667   | rs1025128  | rs10262243 | rs10274998 |
| rs10197031 | rs10204933 | rs10212483 | rs10226228 | rs10237162  | rs1025143  | rs10262453 | rs10275044 |
| rs1019706  | rs10204994 | rs10213171 | rs10226266 | rs10237233  | rs10251438 | rs10262462 | rs10275045 |
| rs10197140 | rs10205057 | rs10213458 | rs10226308 | rs10237280  | rs10251937 | rs10262599 | rs10275421 |
| rs10197255 | rs10205410 | rs1021363  | rs10226357 | rs10237317  | rs10252114 | rs1026364  | rs10275488 |
| rs10197337 | rs10205421 | rs10213692 | rs10226458 | rs10237377  | rs1025217  | rs10263707 | rs10275712 |
| rs10197655 | rs10205700 | rs10214145 | rs10226517 | rs1023741   | rs10252228 | rs10263851 | rs10275833 |
| rs10197780 | rs10206087 | rs10214237 | rs10226719 | rs10237524  | rs10252234 | rs10264053 | rs10275982 |
| rs10197805 | rs10206089 | rs1021435  | rs1022688  | rs10238028  | rs10252457 | rs10264106 | rs10276303 |
| rs10197862 | rs10206196 | rs1021469  | rs10227076 | rs10238339  | rs10252662 | rs1026422  | rs10276381 |
| rs10197987 | rs10206462 | rs1021479  | rs102274   | rs10238435  | rs10252701 | rs10264505 | rs1027643  |

|            |            |            |            |            |            |            |            |
|------------|------------|------------|------------|------------|------------|------------|------------|
| rs1027647  | rs1030268  | rs1035942  | rs10401969 | rs10411210 | rs10421247 | rs10429305 | rs1044145  |
| rs10276530 | rs1030271  | rs1036034  | rs10402145 | rs10411428 | rs10421262 | rs10429489 | rs10441737 |
| rs10276619 | rs1030420  | rs1036190  | rs10402252 | rs10411508 | rs10421333 | rs10429537 | rs1044258  |
| rs10276670 | rs1030431  | rs1036207  | rs10402271 | rs10411512 | rs10421341 | rs10429558 | rs1044261  |
| rs10276674 | rs1030461  | rs1036230  | rs10402293 | rs10411619 | rs10421385 | rs10429582 | rs1044299  |
| rs10277115 | rs1030472  | rs1036332  | rs10402308 | rs10411696 | rs10421414 | rs10429910 | rs1044352  |
| rs10277163 | rs10305290 | rs1036336  | rs10402712 | rs10411759 | rs10421472 | rs10429950 | rs1044358  |
| rs10277273 | rs10305420 | rs1036429  | rs10402747 | rs10411936 | rs1042151  | rs1043003  | rs10444039 |
| rs10277403 | rs10305492 | rs1036464  | rs10402849 | rs10411958 | rs10421599 | rs10430064 | rs10444280 |
| rs1027742  | rs10305677 | rs1036476  | rs10402931 | rs10411970 | rs1042164  | rs1043009  | rs10444491 |
| rs10277582 | rs10305916 | rs1036477  | rs10403118 | rs10412048 | rs10421649 | rs10430643 | rs10444776 |
| rs10278    | rs10305919 | rs1036646  | rs10403206 | rs10412166 | rs10421676 | rs1043069  | rs1044486  |
| rs10278040 | rs1030766  | rs1036819  | rs10403273 | rs10412446 | rs10421727 | rs10430743 | rs10445033 |
| rs10278227 | rs1031034  | rs1036821  | rs10404004 | rs10412449 | rs10421876 | rs1043099  | rs10445034 |
| rs10278305 | rs1031153  | rs1036902  | rs10404046 | rs10412972 | rs10422126 | rs1043101  | rs10445367 |
| rs10278337 | rs1031163  | rs1036935  | rs10404237 | rs1041302  | rs10422323 | rs10431061 | rs10445368 |
| rs10278449 | rs1031389  | rs1037011  | rs10404486 | rs10413103 | rs10422861 | rs10431385 | rs10445374 |
| rs10278627 | rs1031391  | rs1037100  | rs10404726 | rs10413278 | rs10423120 | rs10431427 | rs10445391 |
| rs10278679 | rs1031423  | rs1037116  | rs10405035 | rs10413329 | rs10423223 | rs10432034 | rs1044573  |
| rs10278686 | rs1031654  | rs1037117  | rs10405147 | rs10413698 | rs10423674 | rs10432084 | rs10445946 |
| rs10278969 | rs1031670  | rs1037144  | rs1040520  | rs10413922 | rs10423719 | rs10432169 | rs1044595  |
| rs10279209 | rs1031684  | rs1037169  | rs10405357 | rs10413947 | rs10423726 | rs10432370 | rs10446280 |
| rs10279237 | rs1031755  | rs1037170  | rs10405373 | rs10414043 | rs10423733 | rs10432479 | rs10446419 |
| rs10279261 | rs1031771  | rs1037171  | rs10405382 | rs10414065 | rs10423874 | rs10432510 | rs10447301 |
| rs10279715 | rs1031831  | rs1037271  | rs10405423 | rs10414149 | rs1042391  | rs1043254  | rs10447338 |
| rs10279895 | rs1031868  | rs1037378  | rs10405462 | rs1041449  | rs10423928 | rs10432638 | rs10447396 |
| rs10280045 | rs1032129  | rs1037702  | rs1040553  | rs10414501 | rs10424080 | rs10433500 | rs10447553 |
| rs10280201 | rs1032295  | rs1037814  | rs10405535 | rs1041456  | rs10424198 | rs10433609 | rs1044778  |
| rs1028045  | rs1032296  | rs1037985  | rs1040555  | rs1041478  | rs10424217 | rs10433875 | rs1044796  |
| rs10281146 | rs1032297  | rs1038026  | rs10405693 | rs10414846 | rs10424332 | rs10433879 | rs10448    |
| rs10281571 | rs1032388  | rs1038088  | rs10405764 | rs10415135 | rs10424405 | rs1043407  | rs10448005 |
| rs10281637 | rs1032466  | rs1038093  | rs10405809 | rs10415188 | rs1042445  | rs10434549 | rs10448048 |
| rs10281741 | rs1032501  | rs1038165  | rs10406080 | rs1041530  | rs10424619 | rs10434704 | rs10448080 |
| rs10281827 | rs1032507  | rs1038193  | rs10406327 | rs10415320 | rs1042464  | rs10434895 | rs1044822  |
| rs10282122 | rs1032577  | rs1038304  | rs10406431 | rs10415976 | rs10424878 | rs10434896 | rs10448275 |
| rs10282292 | rs1032726  | rs1038630  | rs10406816 | rs10415992 | rs10424912 | rs10435033 | rs10448340 |
| rs10282411 | rs1032772  | rs1038694  | rs10406943 | rs10416027 | rs10424978 | rs10435093 | rs10448576 |
| rs10282458 | rs1032841  | rs1038804  | rs10407022 | rs1041606  | rs1042499  | rs1043515  | rs1044864  |
| rs10282707 | rs103294   | rs1038822  | rs10407062 | rs10416087 | rs10425079 | rs10435719 | rs1044873  |
| rs10283100 | rs1032988  | rs1038903  | rs1040724  | rs10416218 | rs10425377 | rs1043595  | rs10449752 |
| rs10283145 | rs1033407  | rs1039002  | rs10407429 | rs10416265 | rs10425465 | rs10435974 | rs1044977  |
| rs1028321  | rs1033667  | rs1039405  | rs10407439 | rs10416530 | rs10425544 | rs1043618  | rs10450586 |
| rs10283362 | rs1033686  | rs1039440  | rs10408163 | rs10416746 | rs10425559 | rs1043657  | rs1045075  |
| rs10283564 | rs1033849  | rs1039716  | rs10408351 | rs10416763 | rs10425629 | rs10436911 | rs10450860 |
| rs10283730 | rs1033962  | rs1039751  | rs10408464 | rs1041733  | rs10425738 | rs10437097 | rs1045216  |
| rs1028397  | rs1034200  | rs10398    | rs1040851  | rs10417470 | rs1042579  | rs1043764  | rs1045241  |
| rs1028455  | rs1034332  | rs1039916  | rs10408945 | rs10417519 | rs10426    | rs10437653 | rs1045242  |
| rs1028655  | rs1034528  | rs10399805 | rs10408947 | rs10417824 | rs1042602  | rs10437868 | rs1045267  |
| rs1028727  | rs1034564  | rs10399947 | rs10409138 | rs10418046 | rs10426256 | rs10437954 | rs10452848 |
| rs1028772  | rs1034565  | rs10399993 | rs1040922  | rs10418164 | rs10426317 | rs10438284 | rs1045303  |
| rs1028911  | rs1034566  | rs10400054 | rs10409243 | rs10418205 | rs1042636  | rs10438354 | rs10453225 |
| rs1028938  | rs1034811  | rs1040026  | rs10409264 | rs10418305 | rs10426401 | rs10438355 | rs10453441 |
| rs1028997  | rs1034816  | rs10400322 | rs10409421 | rs10418923 | rs1042663  | rs10438679 | rs10454087 |
| rs1029212  | rs1034906  | rs10400419 | rs10409474 | rs10419198 | rs1042678  | rs1043879  | rs1045411  |
| rs1029238  | rs1034948  | rs1040046  | rs10409772 | rs10419226 | rs10426903 | rs10438820 | rs1045430  |
| rs1029278  | rs1035010  | rs1040070  | rs10409940 | rs10419308 | rs10426930 | rs10438961 | rs1045463  |
| rs1029285  | rs1035029  | rs1040102  | rs10410601 | rs1041968  | rs10427021 | rs10438964 | rs1045476  |
| rs1029388  | rs1035051  | rs1040103  | rs10410606 | rs10420089 | rs1042704  | rs1043897  | rs10454798 |
| rs1029472  | rs1035101  | rs10401030 | rs10410645 | rs1042010  | rs10427204 | rs10438978 | rs10454905 |
| rs1029534  | rs1035142  | rs10401175 | rs1041070  | rs10420107 | rs1042725  | rs10438979 | rs10455025 |
| rs1029555  | rs1035209  | rs10401176 | rs10410723 | rs10420217 | rs10427255 | rs10438986 | rs10455052 |
| rs1029732  | rs1035491  | rs10401193 | rs1041073  | rs10420309 | rs1042779  | rs10439607 | rs10455097 |
| rs1029809  | rs1035560  | rs1040124  | rs10410864 | rs1042034  | rs10428132 | rs10440041 | rs10455120 |
| rs1029830  | rs1035578  | rs10401670 | rs10410869 | rs10420373 | rs10428766 | rs10440098 | rs1045530  |
| rs1029984  | rs1035673  | rs10401672 | rs10410942 | rs1042058  | rs1042901  | rs10440165 | rs10455695 |
| rs1030015  | rs1035738  | rs10401695 | rs10410950 | rs10420798 | rs10429035 | rs10440825 | rs10455872 |
| rs1030062  | rs1035940  | rs10401883 | rs10411032 | rs10420951 | rs10429294 | rs10440833 | rs1045590  |

|            |            |            |             |            |            |            |            |
|------------|------------|------------|-------------|------------|------------|------------|------------|
| rs10455979 | rs10462335 | rs10473868 | rs10483776  | rs10491128 | rs10496816 | rs1050239  | rs10508477 |
| rs10456089 | rs10462383 | rs10473874 | rs10483785  | rs10491129 | rs10496963 | rs10502437 | rs1050855  |
| rs10456100 | rs10462395 | rs1047392  | rs1048381   | rs10491140 | rs10496964 | rs10502675 | rs1050863  |
| rs1045626  | rs1046268  | rs10474066 | rs10483981  | rs10491171 | rs10497215 | rs10502861 | rs10508671 |
| rs10456362 | rs10462706 | rs10474093 | rs10484389  | rs10491431 | rs10497239 | rs10502868 | rs10508700 |
| rs10456506 | rs1046276  | rs10474100 | rs10484399  | rs10491678 | rs10497324 | rs1050288  | rs10508727 |
| rs10456544 | rs10462889 | rs10474277 | rs10484552  | rs10491779 | rs10497345 | rs10502966 | rs10508765 |
| rs10456862 | rs10463065 | rs10474352 | rs10484554  | rs10491952 | rs10497394 | rs10503002 | rs10508921 |
| rs10456918 | rs10463076 | rs10474356 | rs10484561  | rs10491964 | rs10497529 | rs1050316  | rs10509168 |
| rs10456940 | rs1046321  | rs10475186 | rs10484565  | rs10491967 | rs10497655 | rs10503246 | rs10509251 |
| rs10456943 | rs10463311 | rs10475249 | rs10484683  | rs1049205  | rs10497813 | rs10503253 | rs10509373 |
| rs1045706  | rs10463316 | rs10475748 | rs10484761  | rs1049212  | rs10497870 | rs1050327  | rs10509516 |
| rs10457129 | rs10463416 | rs1047578  | rs10484820  | rs1049232  | rs10497882 | rs1050331  | rs10509540 |
| rs1045716  | rs10463586 | rs1047586  | rs1048483   | rs10492321 | rs10498218 | rs10503333 | rs10509554 |
| rs10457234 | rs1046411  | rs10476086 | rs10484920  | rs10492336 | rs10498230 | rs1050338  | rs10509669 |
| rs10457252 | rs10464373 | rs10476217 | rs10485022  | rs10492367 | rs10498631 | rs10503387 | rs10509671 |
| rs10457272 | rs1046495  | rs10476265 | rs10485279  | rs10492410 | rs10498632 | rs10503555 | rs1050969  |
| rs10457315 | rs10465133 | rs10476298 | rs10485622  | rs1049281  | rs10498633 | rs1050362  | rs10509735 |
| rs10457327 | rs10465231 | rs10476484 | rs10485715  | rs10492862 | rs10498635 | rs10503669 | rs1050976  |
| rs10457368 | rs10465287 | rs10476781 | rs10486391  | rs1049296  | rs10498652 | rs10503709 | rs1050979  |
| rs10457441 | rs10465885 | rs10477176 | rs10486483  | rs10492972 | rs10498672 | rs10503728 | rs10509790 |
| rs10457469 | rs10466351 | rs10477191 | rs10486567  | rs10493013 | rs1049868  | rs1050382  | rs10509912 |
| rs10457480 | rs1046668  | rs1047743  | rs1048663   | rs10493130 | rs10498713 | rs10503951 | rs10509957 |
| rs10457487 | rs10466829 | rs1047781  | rs10486757  | rs1049334  | rs10498730 | rs10504073 | rs10509982 |
| rs1045774  | rs10466905 | rs10477835 | rs10486782  | rs10493390 | rs10498754 | rs1050420  | rs10510025 |
| rs10458138 | rs10467108 | rs10477894 | rs10486847  | rs10493441 | rs10498767 | rs10504255 | rs10510057 |
| rs1045814  | rs10467109 | rs10477931 | rs10487166  | rs10493442 | rs10498846 | rs10504440 | rs1051006  |
| rs10458358 | rs10467472 | rs10478040 | rs10487459  | rs10493450 | rs10498870 | rs10504474 | rs10510097 |
| rs10458575 | rs1046774  | rs10478102 | rs10487505  | rs10493544 | rs10498891 | rs10504477 | rs10510388 |
| rs1045861  | rs10467747 | rs1047891  | rs10487851  | rs10493596 | rs10499    | rs10504499 | rs10510419 |
| rs10458660 | rs10468017 | rs10479001 | rs10487988  | rs10493618 | rs10499013 | rs1050450  | rs10510452 |
| rs1045879  | rs10468274 | rs10479009 | rs10488055  | rs1049380  | rs10499014 | rs10504813 | rs10510554 |
| rs10458940 | rs10468291 | rs10479024 | rs10488581  | rs10493817 | rs10499016 | rs10504861 | rs10510562 |
| rs1045897  | rs10468482 | rs1047912  | rs10488631  | rs10494041 | rs10499194 | rs10505100 | rs10510607 |
| rs10459012 | rs10468483 | rs10479170 | rs10488763  | rs10494079 | rs10499197 | rs10505102 | rs1051061  |
| rs1045902  | rs10468514 | rs10479177 | rs1048886   | rs10494112 | rs1049927  | rs10505116 | rs10510653 |
| rs1045911  | rs1046874  | rs1047922  | rs10489032  | rs10494217 | rs10499276 | rs10505232 | rs10510659 |
| rs1045916  | rs1046875  | rs10479334 | rs10489044  | rs10494270 | rs10499535 | rs10505258 | rs10510751 |
| rs10459221 | rs10468795 | rs10479400 | rs10489182  | rs10494326 | rs10499658 | rs1050529  | rs10510757 |
| rs10459247 | rs1046896  | rs1047964  | rs10489202  | rs10494363 | rs10499694 | rs10505477 | rs10510939 |
| rs10459501 | rs10469266 | rs10479944 | rs10489206  | rs10494366 | rs10499763 | rs10505483 | rs10511002 |
| rs10459584 | rs1046934  | rs1047998  | rs10489261  | rs10494421 | rs10499878 | rs10505629 | rs10511071 |
| rs1045960  | rs1046943  | rs10480059 | rs1048932   | rs1049457  | rs10499921 | rs10505752 | rs10511262 |
| rs10459648 | rs1046953  | rs10480060 | rs104894696 | rs10494745 | rs10500209 | rs10505836 | rs10511285 |
| rs10459910 | rs1046956  | rs10480299 | rs10489481  | rs10494783 | rs10500212 | rs10506274 | rs10511286 |
| rs1045997  | rs10469840 | rs10480300 | rs10489615  | rs10494964 | rs10500264 | rs1050631  | rs10511323 |
| rs10460032 | rs10469860 | rs10480450 | rs10489626  | rs10495160 | rs10500326 | rs10506328 | rs10511434 |
| rs10460051 | rs1046988  | rs1048070  | rs10489881  | rs10495161 | rs10500355 | rs10506346 | rs10511462 |
| rs10460095 | rs10469955 | rs10481112 | rs10489882  | rs1049526  | rs10500569 | rs10506418 | rs10511652 |
| rs10460108 | rs10469966 | rs10481172 | rs1048990   | rs10495481 | rs10500671 | rs10506525 | rs10512176 |
| rs10460109 | rs1047014  | rs10481454 | rs10490012  | rs10495563 | rs10500721 | rs10506557 | rs10512225 |
| rs10460181 | rs1047030  | rs1048169  | rs10490045  | rs10495713 | rs10500775 | rs1050673  | rs10512248 |
| rs1046025  | rs10470887 | rs1048238  | rs10490046  | rs10495903 | rs10500834 | rs10506868 | rs10512249 |
| rs10460436 | rs10471048 | rs10482792 | rs10490064  | rs10495927 | rs10500844 | rs10507047 | rs10512344 |
| rs10460475 | rs10471310 | rs10482795 | rs10490159  | rs10495928 | rs10500859 | rs10507170 | rs10512348 |
| rs10460533 | rs1047153  | rs10482796 | rs10490175  | rs10495963 | rs10501039 | rs10507223 | rs10512441 |
| rs10460534 | rs10471645 | rs1048303  | rs10490468  | rs10495976 | rs10501081 | rs10507274 | rs10512472 |
| rs10460702 | rs10471753 | rs1048310  | rs1049055   | rs10496076 | rs10501087 | rs10507349 | rs10512597 |
| rs10460716 | rs10471774 | rs10483182 | rs10490626  | rs10496090 | rs10501149 | rs10507419 | rs10512606 |
| rs1046080  | rs10471939 | rs10483213 | rs10490666  | rs10496091 | rs10501157 | rs10507524 | rs10512627 |
| rs1046089  | rs10471960 | rs1048328  | rs10490694  | rs10496150 | rs1050118  | rs1050785  | rs10512839 |
| rs10460960 | rs10472030 | rs10483349 | rs10490840  | rs10496265 | rs10501320 | rs10508115 | rs10512861 |
| rs10461018 | rs10472076 | rs10483353 | rs10490869  | rs10496344 | rs1050152  | rs1050816  | rs10513137 |
| rs10461104 | rs10472291 | rs10483364 | rs10490871  | rs10496447 | rs10501696 | rs1050828  | rs10513249 |
| rs10462028 | rs10473230 | rs10483623 | rs10490924  | rs1049654  | rs10502148 | rs10508366 | rs1051334  |
| rs1046205  | rs10473629 | rs1048372  | rs10491003  | rs10496632 | rs10502249 | rs10508372 | rs1051338  |
| rs10462065 | rs10473864 | rs10483727 | rs1049110   | rs1049673  | rs1050226  | rs1050847  | rs10513494 |

|            |            |            |            |            |            |            |            |
|------------|------------|------------|------------|------------|------------|------------|------------|
| rs10513551 | rs10519170 | rs1054852  | rs1058315  | rs10624573 | rs10663129 | rs1071664  | rs10738948 |
| rs10513686 | rs10519203 | rs1054875  | rs1058319  | rs10625220 | rs1066391  | rs10716881 | rs10739069 |
| rs1051375  | rs1051921  | rs10550106 | rs10584116 | rs10625795 | rs10664154 | rs1071742  | rs10739076 |
| rs10513789 | rs10519210 | rs10550124 | rs1058425  | rs1062600  | rs10665    | rs10717516 | rs10739217 |
| rs10513801 | rs10519227 | rs1055075  | rs10585105 | rs1062601  | rs10665850 | rs10717830 | rs10739220 |
| rs10514168 | rs10519295 | rs1055129  | rs1058588  | rs10626234 | rs1066621  | rs1071803  | rs10739221 |
| rs10514207 | rs10519302 | rs1055144  | rs10586161 | rs10626466 | rs10667251 | rs1071816  | rs10739499 |
| rs1051424  | rs10519488 | rs1055153  | rs1058734  | rs1062753  | rs1066769  | rs1071849  | rs10739578 |
| rs10514299 | rs10519504 | rs1055253  | rs10587485 | rs10627982 | rs10668    | rs1071888  | rs10739649 |
| rs10514300 | rs10519717 | rs1055256  | rs10587701 | rs10628234 | rs10668066 | rs1073090  | rs10739663 |
| rs10514301 | rs10520129 | rs1055348  | rs10587862 | rs106287   | rs10668231 | rs10732279 | rs10739694 |
| rs10514302 | rs10520163 | rs10553577 | rs1058900  | rs1062980  | rs10668467 | rs1073230  | rs10739695 |
| rs10514303 | rs10520176 | rs10554441 | rs1058993  | rs10630427 | rs10668654 | rs10732433 | rs10739700 |
| rs1051432  | rs10520260 | rs1055447  | rs1059091  | rs1063192  | rs10671642 | rs10732573 | rs1073990  |
| rs10514437 | rs1052033  | rs10554589 | rs1059196  | rs10632399 | rs10672196 | rs10732635 | rs10740059 |
| rs1051447  | rs1052053  | rs1055479  | rs1059214  | rs1063281  | rs10672427 | rs10732812 | rs10740094 |
| rs10514475 | rs10520597 | rs10555326 | rs10592192 | rs10633030 | rs1067327  | rs10732976 | rs10740118 |
| rs10514617 | rs1052067  | rs1055559  | rs1059312  | rs1063348  | rs10673692 | rs10733062 | rs10740128 |
| rs10514714 | rs10520789 | rs1055582  | rs1059362  | rs1063355  | rs1067394  | rs10733086 | rs10740131 |
| rs1051482  | rs10520797 | rs10556717 | rs1059369  | rs1063412  | rs10674031 | rs10733289 | rs10740134 |
| rs1051484  | rs10521146 | rs1055821  | rs1059490  | rs10634531 | rs10675541 | rs10733376 | rs10740140 |
| rs10514979 | rs10521149 | rs10559647 | rs1059513  | rs10635713 | rs106763   | rs10733389 | rs10740246 |
| rs10515007 | rs10521222 | rs1055973  | rs1059519  | rs1063582  | rs10678780 | rs10733661 | rs10740399 |
| rs10515269 | rs10521305 | rs1056009  | rs10595670 | rs10637379 | rs10679194 | rs10733682 | rs10740497 |
| rs1051533  | rs10521318 | rs1056198  | rs1059592  | rs1063856  | rs10681907 | rs10733828 | rs10740617 |
| rs1051547  | rs1052162  | rs10562650 | rs1059611  | rs1063857  | rs10683106 | rs10733997 | rs10740991 |
| rs10515552 | rs1052248  | rs10563220 | rs1059701  | rs10638925 | rs10683220 | rs10734105 | rs10740993 |
| rs10515678 | rs1052270  | rs105633   | rs1059702  | rs10640460 | rs10683904 | rs10734135 | rs10740995 |
| rs10515750 | rs1052373  | rs1056387  | rs10600180 | rs1064173  | rs10684818 | rs10734153 | rs10741299 |
| rs10515778 | rs1052501  | rs1056441  | rs1060043  | rs1064193  | rs10686842 | rs10734252 | rs10741329 |
| rs10515922 | rs1052536  | rs1056448  | rs10600676 | rs1064213  | rs10687116 | rs10734411 | rs10741336 |
| rs10516107 | rs1052571  | rs1056524  | rs1060105  | rs10642232 | rs10687319 | rs10734564 | rs10741374 |
| rs1051613  | rs1052618  | rs1056562  | rs1060286  | rs10642753 | rs10687766 | rs10734649 | rs1074145  |
| rs10516140 | rs10526240 | rs1056667  | rs1060330  | rs10642898 | rs10690148 | rs10734650 | rs10741534 |
| rs10516446 | rs1052693  | rs10567431 | rs1060348  | rs1064351  | rs1069219  | rs10734834 | rs10741616 |
| rs10516487 | rs1052788  | rs1056927  | rs1060402  | rs1064395  | rs10692222 | rs10734924 | rs10741657 |
| rs10516491 | rs10529605 | rs1056932  | rs1060431  | rs10644111 | rs10692760 | rs10735341 | rs10741688 |
| rs10516526 | rs1053004  | rs10569394 | rs1060435  | rs10644269 | rs10692845 | rs10735362 | rs10741695 |
| rs10516528 | rs10530053 | rs10570981 | rs10605167 | rs10644456 | rs10692988 | rs10735836 | rs10741807 |
| rs10516537 | rs1053051  | rs1057119  | rs1060570  | rs10645822 | rs10698713 | rs10735851 | rs10741859 |
| rs10516839 | rs10531214 | rs1057200  | rs1060709  | rs1064583  | rs10699671 | rs10736059 | rs10741929 |
| rs10516930 | rs1053124  | rs1057208  | rs1060817  | rs1064608  | rs1070073  | rs10736116 | rs10742179 |
| rs1051695  | rs10531957 | rs10572535 | rs1061032  | rs1064713  | rs10706646 | rs10736156 | rs10742340 |
| rs10517086 | rs1053338  | rs1057258  | rs1061036  | rs10647170 | rs10706809 | rs1073632  | rs10742591 |
| rs10517245 | rs10535297 | rs10573551 | rs10610420 | rs1064807  | rs10708242 | rs10736390 | rs10742752 |
| rs10517289 | rs10535587 | rs1057523  | rs10610520 | rs10648808 | rs10708332 | rs10736469 | rs10742977 |
| rs1051730  | rs10535596 | rs1057548  | rs1061072  | rs10649122 | rs10708550 | rs10736586 | rs10743086 |
| rs1051738  | rs1053593  | rs1057626  | rs1061093  | rs1064939  | rs10708984 | rs10736831 | rs10743098 |
| rs1051750  | rs1053651  | rs10576500 | rs1061098  | rs10649609 | rs10709981 | rs10736877 | rs10743129 |
| rs10517621 | rs1053711  | rs1057687  | rs1061147  | rs10649697 | rs10710280 | rs10737105 | rs10743181 |
| rs10517653 | rs10537307 | rs10577090 | rs1061170  | rs10650434 | rs10710459 | rs10737452 | rs10743187 |
| rs10517660 | rs1053874  | rs10577826 | rs1061237  | rs10650779 | rs10710484 | rs10737462 | rs10743315 |
| rs10518019 | rs1053941  | rs10577852 | rs1061407  | rs10651759 | rs10710560 | rs10737515 | rs10743353 |
| rs10518133 | rs10539959 | rs1057868  | rs1061502  | rs1065406  | rs10711289 | rs10737554 | rs10743579 |
| rs10518269 | rs1054037  | rs1057902  | rs1061539  | rs10654220 | rs10711474 | rs10737620 | rs10743612 |
| rs10518275 | rs1054091  | rs1057910  | rs1061651  | rs10655262 | rs10712836 | rs10737680 | rs10743640 |
| rs10518544 | rs10541015 | rs1057941  | rs1061657  | rs1065656  | rs10713212 | rs10737693 | rs10743940 |
| rs1051860  | rs10541209 | rs1057985  | rs1061801  | rs10656721 | rs10713774 | rs10737713 | rs10743966 |
| rs10518693 | rs10542411 | rs1058     | rs1061808  | rs10657459 | rs10714153 | rs10737818 | rs10743986 |
| rs10518694 | rs1054280  | rs1058018  | rs1061810  | rs10657979 | rs10714360 | rs10738466 | rs1074407  |
| rs10518726 | rs1054442  | rs1058029  | rs1061813  | rs1065852  | rs10714771 | rs10738501 | rs10744146 |
| rs10518732 | rs10544956 | rs10580742 | rs1061837  | rs1065853  | rs10715060 | rs10738556 | rs10744183 |
| rs10518733 | rs1054521  | rs1058172  | rs1062070  | rs1065861  | rs10715134 | rs10738605 | rs10744213 |
| rs10518743 | rs1054564  | rs10581924 | rs10622246 | rs10660569 | rs10715507 | rs10738607 | rs10744481 |
| rs1051904  | rs1054609  | rs10582034 | rs10622381 | rs10661423 | rs1071644  | rs10738626 | rs10744560 |
| rs10519067 | rs1054661  | rs1058205  | rs10623258 | rs10661645 | rs1071648  | rs10738700 | rs10744591 |
| rs10519068 | rs1054684  | rs1058305  | rs10623840 | rs10663094 | rs10716631 | rs10738760 | rs10744592 |



|            |            |            |            |            |             |            |            |
|------------|------------|------------|------------|------------|-------------|------------|------------|
| rs1074462  | rs10750450 | rs10757283 | rs10761674 | rs10767695 | rs10773049  | rs10779122 | rs10786114 |
| rs10744727 | rs10750486 | rs10757287 | rs10761716 | rs10767733 | rs10773100  | rs10779158 | rs10786152 |
| rs10744774 | rs10750524 | rs10757410 | rs10761723 | rs10767734 | rs10773105  | rs10779169 | rs10786156 |
| rs10744775 | rs10750539 | rs10757411 | rs10761731 | rs10767744 | rs10773112  | rs10779271 | rs10786325 |
| rs10744777 | rs10750766 | rs10757416 | rs10761737 | rs10767869 | rs10773178  | rs10779364 | rs10786330 |
| rs10744826 | rs10750786 | rs10757417 | rs10761739 | rs10767873 | rs10773208  | rs10779447 | rs10786387 |
| rs10744856 | rs10750840 | rs10757463 | rs10761741 | rs10768108 | rs10773302  | rs10779596 | rs10786643 |
| rs10745324 | rs10750866 | rs10757826 | rs10761751 | rs10768122 | rs10773394  | rs10779795 | rs10786559 |
| rs10745332 | rs10751226 | rs10757893 | rs10761753 | rs10768174 | rs10773657  | rs10779835 | rs10786610 |
| rs10745363 | rs10751450 | rs10758232 | rs10761756 | rs1076872  | rs1077393   | rs1077989  | rs10786658 |
| rs10745460 | rs10751451 | rs10758239 | rs10761760 | rs10768737 | rs10774018  | rs10779936 | rs10786662 |
| rs10745624 | rs10751647 | rs10758255 | rs10761765 | rs1076884  | rs10774020  | rs10780116 | rs10786714 |
| rs10745659 | rs10751725 | rs10758481 | rs10761779 | rs10769041 | rs10774021  | rs10780209 | rs10786721 |
| rs10745742 | rs1075177  | rs1075855  | rs10761784 | rs10769130 | rs10774037  | rs10780329 | rs10786736 |
| rs10745763 | rs1075195  | rs10758593 | rs10761785 | rs10769187 | rs10774095  | rs10780467 | rs10786772 |
| rs10745789 | rs10752118 | rs10758594 | rs10762264 | rs10769204 | rs10774183  | rs10780649 | rs10786774 |
| rs10745841 | rs10752212 | rs10758656 | rs10762269 | rs10769248 | rs10774214  | rs10780650 | rs10786831 |
| rs10745925 | rs10752262 | rs10758658 | rs1076230  | rs10769254 | rs10774231  | rs1078081  | rs10786832 |
| rs10745936 | rs1075228  | rs10758669 | rs10762407 | rs10769255 | rs10774405  | rs1078112  | rs10787268 |
| rs10745954 | rs1075265  | rs1075870  | rs10762434 | rs10769256 | rs10774439  | rs10781130 | rs10787270 |
| rs10746495 | rs10752652 | rs1075871  | rs10762477 | rs10769263 | rs10774579  | rs10781182 | rs10787287 |
| rs10746509 | rs10752898 | rs10758950 | rs10762481 | rs1076928  | rs10774599  | rs10781366 | rs10787428 |
| rs10746514 | rs10752944 | rs10758961 | rs10762489 | rs10769282 | rs10774610  | rs10781499 | rs10787429 |
| rs1074657  | rs10753074 | rs1075901  | rs10762670 | rs10769601 | rs10774624  | rs10781534 | rs10787453 |
| rs1074683  | rs10753130 | rs10759208 | rs10762738 | rs10769780 | rs10774625  | rs10781540 | rs10787486 |
| rs10746837 | rs10753165 | rs10759243 | rs10762861 | rs10769936 | rs10774740  | rs10781543 | rs10787517 |
| rs10746862 | rs10753280 | rs10759257 | rs1076301  | rs10769960 | rs10774909  | rs10781573 | rs10787518 |
| rs10746942 | rs10753331 | rs1075927  | rs10763170 | rs10769966 | rs10775009  | rs10781976 | rs1078806  |
| rs10746959 | rs10753459 | rs10759298 | rs10763567 | rs10770036 | rs1077514   | rs10782001 | rs10788066 |
| rs1074703  | rs10753502 | rs10759426 | rs10763587 | rs10770119 | rs1077514-G | rs10782008 | rs10788160 |
| rs10747049 | rs10753534 | rs10759832 | rs10763957 | rs10770131 | rs10775208  | rs10782230 | rs10788264 |
| rs1074707  | rs10753661 | rs10759881 | rs10764201 | rs1077037  | rs1077534   | rs10782490 | rs10788289 |
| rs10747478 | rs10753787 | rs1075989  | rs10764256 | rs10770612 | rs10775348  | rs10782553 | rs10788549 |
| rs10747488 | rs10753805 | rs10759927 | rs10764331 | rs10770646 | rs10775360  | rs10782606 | rs10788569 |
| rs10747502 | rs10753823 | rs10760117 | rs10764437 | rs10770700 | rs10775404  | rs10782651 | rs10788575 |
| rs10747514 | rs10753933 | rs10760123 | rs10764493 | rs10770705 | rs10775406  | rs1078301  | rs1078859  |
| rs10747570 | rs1075403  | rs10760126 | rs10764494 | rs10770822 | rs10775412  | rs10783018 | rs10788804 |
| rs1074765  | rs1075417  | rs10760213 | rs10764671 | rs10770828 | rs10776558  | rs10783100 | rs10788817 |
| rs10747689 | rs10754199 | rs10760267 | rs10764672 | rs10770829 | rs1077667   | rs1078311  | rs10788819 |
| rs10747784 | rs10754218 | rs10760276 | rs10764717 | rs10770837 | rs10776752  | rs10783243 | rs10788872 |
| rs10748099 | rs10754220 | rs10760277 | rs1076485  | rs10771005 | rs10777163  | rs10783299 | rs10788873 |
| rs10748128 | rs10754228 | rs10760279 | rs10765186 | rs10771216 | rs10777167  | rs10783340 | rs10788951 |
| rs10748165 | rs1075456  | rs10760361 | rs1076540  | rs10771251 | rs10777178  | rs10783446 | rs10788954 |
| rs10748401 | rs1075472  | rs10760442 | rs10765404 | rs10771372 | rs10777212  | rs10783478 | rs10788958 |
| rs10748574 | rs10755148 | rs10760444 | rs10765496 | rs10771399 | rs10777221  | rs10783484 | rs10788969 |
| rs10748604 | rs10755296 | rs10760580 | rs10765544 | rs10771462 | rs10777237  | rs10783487 | rs10789019 |
| rs10748696 | rs10755687 | rs10760593 | rs10765567 | rs10771511 | rs10777342  | rs10783491 | rs10789097 |
| rs10748781 | rs10755885 | rs10760673 | rs10765568 | rs10771746 | rs10777378  | rs10783573 | rs10789114 |
| rs10748798 | rs10755927 | rs10760678 | rs10765711 | rs10771813 | rs10777536  | rs10783580 | rs10789181 |
| rs10748799 | rs10756153 | rs10760691 | rs10765754 | rs10771891 | rs10777538  | rs10783615 | rs10789207 |
| rs10748818 | rs1075619  | rs10760734 | rs10765762 | rs10771962 | rs10777546  | rs10783779 | rs10789214 |
| rs10748841 | rs10756197 | rs10761086 | rs10765775 | rs10771989 | rs10777559  | rs10783853 | rs10789250 |
| rs10749053 | rs10756488 | rs10761129 | rs10765776 | rs10772040 | rs1077773   | rs10783854 | rs10789285 |
| rs10749233 | rs10756555 | rs10761177 | rs10765792 | rs10772108 | rs10777859  | rs1078442  | rs10789340 |
| rs10749415 | rs10756571 | rs10761202 | rs10765820 | rs10772280 | rs1077795   | rs10784445 | rs10789347 |
| rs10749436 | rs10756714 | rs10761215 | rs10765918 | rs10772289 | rs10778159  | rs10784447 | rs10789368 |
| rs10749452 | rs10756728 | rs10761240 | rs10766075 | rs10772314 | rs10778213  | rs10784474 | rs10789369 |
| rs1074958  | rs10756762 | rs10761247 | rs10766076 | rs10772420 | rs10778215  | rs10784502 | rs10789387 |
| rs10749609 | rs10756785 | rs10761251 | rs10766194 | rs10772448 | rs1077834   | rs1078451  | rs10789396 |
| rs10749636 | rs10756796 | rs10761318 | rs10766309 | rs10772533 | rs1077835   | rs10784510 | rs10789436 |
| rs10749659 | rs10756851 | rs1076135  | rs10766451 | rs10772643 | rs10778495  | rs1078459  | rs10789442 |
| rs1074993  | rs10756907 | rs10761387 | rs10766533 | rs10772644 | rs10778498  | rs10785131 | rs10789481 |
| rs10750025 | rs10757022 | rs10761530 | rs10766948 | rs10772657 | rs10778504  | rs1078514  | rs10789588 |
| rs10750139 | rs10757112 | rs10761604 | rs10767654 | rs10772983 | rs10778517  | rs10785282 | rs1078967  |
| rs10750291 | rs10757269 | rs10761620 | rs10767658 | rs10773000 | rs10778576  | rs10785795 | rs10789752 |
| rs10750385 | rs10757274 | rs10761648 | rs10767659 | rs10773002 | rs10778623  | rs10785876 | rs10789929 |
| rs10750397 | rs10757278 | rs10761659 | rs10767664 | rs10773003 | rs10779035  | rs10786068 | rs10789931 |

|            |            |            |            |            |            |            |            |
|------------|------------|------------|------------|------------|------------|------------|------------|
| rs10789934 | rs10794666 | rs1080014  | rs10807199 | rs10815095 | rs10820606 | rs10824307 | rs10832254 |
| rs10789942 | rs10794667 | rs10800309 | rs10807422 | rs10815097 | rs10820612 | rs10824347 | rs10832289 |
| rs10790087 | rs10794720 | rs10800314 | rs10807491 | rs10815146 | rs10820741 | rs10824378 | rs10832310 |
| rs10790112 | rs10795055 | rs10800453 | rs10807603 | rs10815276 | rs10820747 | rs10824380 | rs10832570 |
| rs10790162 | rs10795075 | rs10800507 | rs10807751 | rs10815302 | rs10820788 | rs10824516 | rs10832571 |
| rs10790255 | rs10795422 | rs10800531 | rs10807839 | rs10815355 | rs10820852 | rs10824518 | rs10832573 |
| rs10790256 | rs10795433 | rs10800542 | rs1080789  | rs10815376 | rs10821066 | rs10824560 | rs10832586 |
| rs10790268 | rs10795464 | rs10800558 | rs10808021 | rs10815397 | rs10821080 | rs10824722 | rs10832618 |
| rs10790313 | rs10795523 | rs10800624 | rs10808026 | rs10815466 | rs10821083 | rs10824723 | rs10832648 |
| rs10790380 | rs1079558  | rs1080066  | rs1080807  | rs10815509 | rs10821097 | rs10824760 | rs10832961 |
| rs10790449 | rs10795656 | rs10800746 | rs10808536 | rs10816341 | rs10821129 | rs10824796 | rs10832962 |
| rs10790452 | rs10795668 | rs10800813 | rs10808546 | rs10816359 | rs10821131 | rs10825503 | rs10832963 |
| rs10790495 | rs10795672 | rs10800992 | rs10808564 | rs10816570 | rs10821136 | rs10826334 | rs10833106 |
| rs10790519 | rs1079572  | rs10801047 | rs10808565 | rs10816595 | rs10821196 | rs10826337 | rs10833470 |
| rs10790767 | rs10795791 | rs10801553 | rs10808638 | rs10816625 | rs10821311 | rs10826545 | rs10835060 |
| rs10790809 | rs10795831 | rs10801555 | rs10808671 | rs10816784 | rs10821339 | rs10826579 | rs10835169 |
| rs10790962 | rs10795945 | rs10801556 | rs10808813 | rs10816812 | rs10821415 | rs10826753 | rs10835187 |
| rs10790969 | rs1079596  | rs10801561 | rs10809266 | rs10816914 | rs10821523 | rs10826851 | rs10835188 |
| rs10791037 | rs10796303 | rs10801582 | rs10809441 | rs10817003 | rs10821556 | rs10826869 | rs10835483 |
| rs10791097 | rs10796828 | rs10801682 | rs10809520 | rs10817007 | rs10821746 | rs10826995 | rs10835489 |
| rs10791098 | rs10796912 | rs10801690 | rs10809558 | rs1081707  | rs10821808 | rs10827226 | rs10835498 |
| rs10791099 | rs10796927 | rs10801851 | rs10809650 | rs10817081 | rs10821905 | rs10827250 | rs10835565 |
| rs10791106 | rs10796944 | rs10801908 | rs10809826 | rs10817133 | rs10821907 | rs10827252 | rs10835638 |
| rs10791111 | rs10797055 | rs10802069 | rs10810071 | rs10817260 | rs10821936 | rs10827565 | rs10835690 |
| rs10791113 | rs10797060 | rs1080225  | rs10810098 | rs10817465 | rs10821944 | rs10827597 | rs10835696 |
| rs10791143 | rs10797119 | rs10802496 | rs10810099 | rs10817493 | rs10821950 | rs10827785 | rs10835721 |
| rs10791660 | rs1079734  | rs10802501 | rs10810107 | rs10817520 | rs10821952 | rs10828247 | rs10835889 |
| rs10791824 | rs10797342 | rs10802580 | rs10810145 | rs10817582 | rs10821953 | rs10828266 | rs10835916 |
| rs10791830 | rs10797374 | rs10802708 | rs10810455 | rs10817638 | rs10821967 | rs10828317 | rs10835920 |
| rs10791902 | rs10797431 | rs1080278  | rs10810603 | rs10817678 | rs10821973 | rs10828363 | rs10836366 |
| rs10792    | rs10797432 | rs10803055 | rs10810635 | rs10817758 | rs10821977 | rs10828674 | rs10836367 |
| rs10792006 | rs10797576 | rs10803124 | rs10810650 | rs10817870 | rs10822013 | rs10828723 | rs10836538 |
| rs10792032 | rs10797662 | rs10803130 | rs10810657 | rs10817872 | rs10822037 | rs10828725 | rs10836699 |
| rs10792091 | rs10797665 | rs10803138 | rs1081073  | rs10817888 | rs10822050 | rs10829163 | rs10838137 |
| rs10792263 | rs10797816 | rs10803164 | rs1081105  | rs10817895 | rs10822073 | rs10829282 | rs10838201 |
| rs1079227  | rs10797857 | rs10803194 | rs10811408 | rs10817896 | rs10822082 | rs10829700 | rs10838433 |
| rs10792352 | rs10797858 | rs10803394 | rs10811412 | rs10817969 | rs10822145 | rs10829757 | rs10838435 |
| rs10792422 | rs10797877 | rs10803581 | rs10811413 | rs10818400 | rs10822153 | rs10829848 | rs10838845 |
| rs10792472 | rs10797938 | rs10803624 | rs10811645 | rs10818482 | rs10822155 | rs10830107 | rs10838845 |
| rs10792832 | rs10797987 | rs10803762 | rs10811650 | rs10818483 | rs10822159 | rs10830201 | rs10838860 |
| rs10793129 | rs10797996 | rs10804171 | rs10811652 | rs10818576 | rs10822161 | rs10830220 | rs10838861 |
| rs10793308 | rs10798014 | rs10804189 | rs10811654 | rs10818604 | rs10822163 | rs10830244 | rs10838862 |
| rs10793310 | rs10798069 | rs10804260 | rs10811660 | rs10818606 | rs10822168 | rs10830253 | rs10838862 |
| rs10793514 | rs10798302 | rs10804330 | rs10811661 | rs10818763 | rs10822182 | rs10830278 | rs10838863 |
| rs10793565 | rs10798415 | rs10804493 | rs10811662 | rs10818769 | rs10822184 | rs10830481 | rs10838861 |
| rs10793567 | rs10798580 | rs10804591 | rs10811664 | rs10818775 | rs10822220 | rs10830568 | rs10838868 |
| rs10793568 | rs10798615 | rs10804658 | rs10811723 | rs10818788 | rs10822743 | rs10830769 | rs10838867 |
| rs10793625 | rs1079866  | rs10804681 | rs10811883 | rs10818797 | rs10822745 | rs10830858 | rs10838869 |
| rs10793727 | rs10798758 | rs10804892 | rs10811888 | rs10818834 | rs10823136 | rs10830893 | rs10838892 |
| rs10793760 | rs10798879 | rs10804990 | rs10811901 | rs10818854 | rs10823156 | rs10830894 | rs10838702 |
| rs10793765 | rs10798880 | rs1080500  | rs10811965 | rs10818930 | rs10823305 | rs10830947 | rs10838708 |
| rs10793821 | rs10798882 | rs10805346 | rs10812332 | rs10818937 | rs10823343 | rs10830956 | rs10838725 |
| rs10793903 | rs10798888 | rs10805383 | rs10812851 | rs10818962 | rs10823395 | rs10830959 | rs10838738 |
| rs10793949 | rs10798893 | rs10805858 | rs10813066 | rs10818963 | rs10823500 | rs10830962 | rs10838798 |
| rs10793962 | rs10799445 | rs10805874 | rs10813156 | rs10819187 | rs10823504 | rs10830963 | rs10838801 |
| rs10793983 | rs10799544 | rs10806133 | rs10813374 | rs10819272 | rs10823610 | rs10831496 | rs10838835 |
| rs10794029 | rs10799590 | rs10806234 | rs10813766 | rs10819287 | rs10823631 | rs10831656 | rs10839204 |
| rs10794057 | rs10799599 | rs10806235 | rs10813912 | rs10819303 | rs10823730 | rs10831676 | rs10839545 |
| rs10794175 | rs10799615 | rs10806334 | rs10813951 | rs10819317 | rs10823791 | rs10831736 | rs10839961 |
| rs1079418  | rs10799667 | rs10806385 | rs10813957 | rs10819335 | rs10823826 | rs10831912 | rs10840060 |
| rs10794221 | rs10799701 | rs10806425 | rs10813960 | rs10819461 | rs10823860 | rs10832013 | rs10840099 |
| rs10794307 | rs10799713 | rs10806906 | rs10814057 | rs10819474 | rs10823893 | rs10832027 | rs10840100 |
| rs10794486 | rs10799728 | rs10806984 | rs10814852 | rs10819655 | rs10823968 | rs10832139 | rs10840129 |
| rs10794527 | rs10799743 | rs10807127 | rs10814853 | rs10819937 | rs10824026 | rs10832169 | rs10840133 |
| rs10794579 | rs10799778 | rs10807136 | rs10814915 | rs10820310 | rs10824058 | rs10832172 | rs10840138 |
| rs10794644 | rs10799792 | rs10807137 | rs10814916 | rs10820411 | rs10824211 | rs10832218 | rs10840291 |
| rs10794648 | rs10799824 | rs10807138 | rs10814917 | rs10820600 | rs10824305 | rs10832252 | rs10840293 |

|            |            |            |            |            |            |            |            |
|------------|------------|------------|------------|------------|------------|------------|------------|
| rs10840341 | rs10845461 | rs10850031 | rs10857036 | rs10862708 | rs10867411 | rs10876550 | rs10883701 |
| rs10840349 | rs10845503 | rs10850127 | rs10857147 | rs10862858 | rs10867416 | rs10876864 | rs10883710 |
| rs10840422 | rs10845506 | rs10850137 | rs10857203 | rs10863114 | rs10868080 | rs10876866 | rs10883723 |
| rs10840457 | rs10845585 | rs10850185 | rs10857228 | rs10863183 | rs10868215 | rs10876947 | rs10883756 |
| rs10840606 | rs10845606 | rs10850377 | rs10857352 | rs10863246 | rs10868476 | rs10877030 | rs10883762 |
| rs10840614 | rs10845938 | rs10850379 | rs10857635 | rs10863398 | rs1086893  | rs10877283 | rs10883765 |
| rs10840645 | rs10845977 | rs10850382 | rs10857788 | rs10863511 | rs10868998 | rs10877905 | rs10883782 |
| rs10841302 | rs10845988 | rs10850407 | rs10857859 | rs10863578 | rs10869665 | rs10877955 | rs10883795 |
| rs10841376 | rs10846071 | rs10850408 | rs10857961 | rs10863714 | rs1087     | rs10877962 | rs10883832 |
| rs10841379 | rs10846153 | rs10850409 | rs10858093 | rs10863790 | rs10870062 | rs10878106 | rs10883846 |
| rs10841385 | rs10846157 | rs10850481 | rs10858096 | rs10863810 | rs10870077 | rs10878236 | rs10883893 |
| rs10841443 | rs10846167 | rs10850519 | rs10858246 | rs10863828 | rs10870202 | rs10878255 | rs10883908 |
| rs10841486 | rs10846255 | rs10850526 | rs10858248 | rs10863899 | rs10870273 | rs10878269 | rs10883931 |
| rs10841508 | rs10846285 | rs10850722 | rs10858250 | rs10863936 | rs1087056  | rs10878298 | rs10883944 |
| rs10841515 | rs10846305 | rs10850777 | rs10858300 | rs10863961 | rs10871451 | rs10878312 | rs10883994 |
| rs10841522 | rs10846380 | rs10850813 | rs10858334 | rs10864013 | rs10871454 | rs10878349 | rs10884064 |
| rs10841580 | rs10846411 | rs10851230 | rs10858628 | rs10864043 | rs10871589 | rs10878359 | rs1088450  |
| rs10841593 | rs10846491 | rs10851383 | rs10858740 | rs10864068 | rs10871643 | rs10878366 | rs10884569 |
| rs10841753 | rs10846497 | rs10851385 | rs10858851 | rs10864086 | rs10871777 | rs10878725 | rs10884920 |
| rs10841848 | rs1084651  | rs10851395 | rs10858881 | rs10864136 | rs10871794 | rs10878947 | rs10885    |
| rs10841868 | rs10846549 | rs10851478 | rs10858917 | rs10864302 | rs10872223 | rs10878984 | rs10885122 |
| rs10842108 | rs10846573 | rs10851523 | rs10858922 | rs10864360 | rs10872224 | rs10878986 | rs10885396 |
| rs10842231 | rs10846577 | rs10851543 | rs10858944 | rs10864368 | rs10872311 | rs10879184 | rs10885405 |
| rs10842240 | rs10846580 | rs10851590 | rs10858948 | rs10864434 | rs10872428 | rs10879211 | rs10885409 |
| rs10842262 | rs10846617 | rs10851698 | rs10858956 | rs10864459 | rs10872447 | rs10879261 | rs10885434 |
| rs10842356 | rs10846657 | rs10851839 | rs10858963 | rs10864462 | rs10872587 | rs10879676 | rs10885447 |
| rs10842383 | rs10846664 | rs10851885 | rs10858966 | rs10864530 | rs10872645 | rs10879715 | rs10885480 |
| rs10842700 | rs10846690 | rs10851907 | rs10859040 | rs10864726 | rs10872678 | rs10879871 | rs10885531 |
| rs10842703 | rs10846742 | rs10851925 | rs10859044 | rs10864728 | rs10873172 | rs10880213 | rs10885877 |
| rs10842704 | rs10846744 | rs10851999 | rs10859140 | rs10864859 | rs10873298 | rs10880321 | rs10885997 |
| rs10842705 | rs10847415 | rs10852008 | rs10859277 | rs10865035 | rs10873299 | rs10880689 | rs10886012 |
| rs10842707 | rs10847864 | rs10852123 | rs10859536 | rs10865050 | rs10873538 | rs10880823 | rs10886017 |
| rs10842708 | rs10848    | rs10852344 | rs10859563 | rs10865054 | rs10873612 | rs10880833 | rs10886021 |
| rs10842750 | rs10848035 | rs1085244  | rs10859567 | rs1086512  | rs10873710 | rs10880855 | rs10886022 |
| rs10842893 | rs10848287 | rs10852506 | rs10859580 | rs10865148 | rs10873871 | rs10880868 | rs10886040 |
| rs10842914 | rs10848507 | rs10852553 | rs10859698 | rs10865189 | rs10873936 | rs10880960 | rs10886094 |
| rs10842971 | rs10848650 | rs10852587 | rs10859834 | rs10865254 | rs10873942 | rs10880966 | rs10886117 |
| rs10842991 | rs10848737 | rs10852606 | rs10859871 | rs10865282 | rs10874004 | rs10881645 | rs10886142 |
| rs10842994 | rs10848835 | rs10852610 | rs10859995 | rs10865308 | rs10874312 | rs10882091 | rs1088639  |
| rs10843003 | rs10848954 | rs10852622 | rs10859996 | rs10865309 | rs10874340 | rs10882101 | rs10886430 |
| rs10843013 | rs10849020 | rs10852847 | rs10860153 | rs10865331 | rs10874746 | rs10882165 | rs10886471 |
| rs10843026 | rs10849022 | rs10852858 | rs10860209 | rs10865355 | rs10874777 | rs10882172 | rs1088670  |
| rs10843030 | rs10849023 | rs10852862 | rs10860295 | rs10865397 | rs10874851 | rs10882177 | rs10886863 |
| rs10843115 | rs10849052 | rs10852891 | rs10860332 | rs10865479 | rs10874938 | rs10882272 | rs10886902 |
| rs10843148 | rs10849061 | rs10852918 | rs1086056  | rs10865548 | rs10875120 | rs10882273 | rs10887265 |
| rs10843151 | rs10849087 | rs10852932 | rs10860738 | rs10865549 | rs10875121 | rs10882283 | rs10887571 |
| rs10843164 | rs10849144 | rs10853029 | rs10860794 | rs10865612 | rs10875357 | rs10882397 | rs10887578 |
| rs10843390 | rs10849145 | rs10853030 | rs10860823 | rs10865753 | rs10875468 | rs10882644 | rs10887584 |
| rs10843391 | rs10849373 | rs10853031 | rs10860882 | rs10865879 | rs10875596 | rs10882661 | rs10887652 |
| rs10843459 | rs10849408 | rs10853057 | rs10860964 | rs10865923 | rs10875742 | rs10882723 | rs10887704 |
| rs10843817 | rs10849412 | rs10853087 | rs10861634 | rs10865936 | rs10875749 | rs10882873 | rs10887718 |
| rs10844074 | rs10849413 | rs10853101 | rs10861637 | rs10865954 | rs10875849 | rs10882891 | rs10887745 |
| rs10844179 | rs10849432 | rs10853455 | rs10861645 | rs10865959 | rs10875882 | rs10882899 | rs10887759 |
| rs10844279 | rs10849433 | rs10853525 | rs10861646 | rs1086603  | rs10875906 | rs10882904 | rs10887768 |
| rs10844339 | rs10849438 | rs10853531 | rs10861661 | rs1086605  | rs10875912 | rs10882925 | rs10887868 |
| rs10844518 | rs10849448 | rs10853627 | rs10861678 | rs10866054 | rs10875914 | rs10883027 | rs10887914 |
| rs10844519 | rs10849478 | rs10853628 | rs10861679 | rs10866498 | rs10875915 | rs10883353 | rs10888148 |
| rs10844639 | rs10849492 | rs10853935 | rs10861694 | rs10866527 | rs10875943 | rs10883359 | rs10888177 |
| rs10844642 | rs10849546 | rs10853952 | rs10861775 | rs10866659 | rs10875976 | rs10883360 | rs10888263 |
| rs10844682 | rs10849773 | rs10853981 | rs10861798 | rs10866717 | rs10876169 | rs10883365 | rs10888499 |
| rs10844706 | rs10849820 | rs10854127 | rs10861861 | rs10866828 | rs10876214 | rs10883437 | rs10888501 |
| rs10844750 | rs10849891 | rs10854166 | rs10861879 | rs10866837 | rs10876448 | rs10883451 | rs10888574 |
| rs10845051 | rs108499   | rs10854167 | rs10861880 | rs10866846 | rs10876450 | rs10883511 | rs10888690 |
| rs10845160 | rs10849915 | rs10854884 | rs10861957 | rs10866867 | rs10876474 | rs10883543 | rs10888692 |
| rs1084524  | rs10849937 | rs10855058 | rs10862376 | rs10866912 | rs10876528 | rs10883560 | rs10888696 |
| rs1084537  | rs10849962 | rs1085639  | rs10862426 | rs10867194 | rs10876530 | rs10883617 | rs10888713 |
| rs10845402 | rs10850001 | rs10856778 | rs10862688 | rs10867332 | rs10876531 | rs10883674 | rs10888971 |

|            |            |            |            |             |            |            |            |
|------------|------------|------------|------------|-------------|------------|------------|------------|
| rs10889130 | rs10895025 | rs10901124 | rs10910076 | rs10917168  | rs10923445 | rs10933153 | rs10938397 |
| rs10889332 | rs10895140 | rs10901216 | rs10910092 | rs10917220  | rs10923523 | rs10933394 | rs10938398 |
| rs10889333 | rs10895141 | rs10901250 | rs10910095 | rs10917347  | rs10923654 | rs10933431 | rs10938494 |
| rs10889337 | rs10895275 | rs10901252 | rs10910445 | rs10917370  | rs10923672 | rs10933548 | rs10939037 |
| rs10889338 | rs10895276 | rs10901553 | rs10910474 | rs10917468  | rs10923712 | rs10933596 | rs10939276 |
| rs10889348 | rs10895277 | rs10901802 | rs10910476 | rs10917477  | rs10923724 | rs10933714 | rs10939485 |
| rs10889353 | rs10895278 | rs10901821 | rs10910836 | rs10917513  | rs10923750 | rs10934011 | rs1093978  |
| rs10889560 | rs10895322 | rs10901823 | rs10910845 | rs10917717  | rs10923929 | rs10934270 | rs10939879 |
| rs10889569 | rs10895596 | rs10901825 | rs10910953 | rs10917750  | rs10923931 | rs10934396 | rs10939881 |
| rs10889574 | rs10895702 | rs10901863 | rs10911009 | rs10917813  | rs10924372 | rs10934420 | rs10939934 |
| rs10889584 | rs10895869 | rs10901868 | rs10911021 | rs10917846  | rs1092479  | rs1093455  | rs10939963 |
| rs10889676 | rs10895987 | rs10901870 | rs10911212 | rs10917872  | rs10925027 | rs10934569 | rs10940072 |
| rs10889677 | rs10896012 | rs10901988 | rs10911268 | rs10917958  | rs10925060 | rs10934578 | rs10940080 |
| rs10890020 | rs10896015 | rs10902094 | rs10911271 | rs10918048  | rs10926973 | rs10934582 | rs10940346 |
| rs10890032 | rs10896024 | rs10902121 | rs10911301 | rs1091811   | rs10926991 | rs10934646 | rs1094038  |
| rs10890232 | rs10896028 | rs10902223 | rs10911356 | rs1091812   | rs10927006 | rs10934680 | rs10940431 |
| rs10890383 | rs10896045 | rs10902324 | rs10911456 | rs10918192  | rs10927053 | rs10934682 | rs10940474 |
| rs10890837 | rs10896064 | rs10902360 | rs10911457 | rs10918274  | rs10927065 | rs10934753 | rs10940540 |
| rs10891256 | rs10896090 | rs10902475 | rs10911505 | rs10918630  | rs10927875 | rs10934754 | rs10940642 |
| rs10891286 | rs10896125 | rs10902605 | rs10911628 | rs10918701  | rs1092801  | rs10934853 | rs10940767 |
| rs10891290 | rs10896139 | rs10903002 | rs10912267 | rs10919070  | rs10928190 | rs10934960 | rs10940921 |
| rs10891483 | rs10896348 | rs10903120 | rs10912564 | rs10919071  | rs10928224 | rs10934989 | rs10941043 |
| rs10891496 | rs10896437 | rs10903122 | rs10912578 | rs10919071- | rs10928235 | rs10935143 | rs10941191 |
| rs10891499 | rs10896449 | rs10903128 | rs10912697 | G           | rs10928240 | rs10935181 | rs10941225 |
| rs10891547 | rs10896581 | rs10903129 | rs10912869 | rs10919378  | rs10928243 | rs10935182 | rs10941407 |
| rs10891549 | rs10896633 | rs10903311 | rs10912870 | rs10919382  | rs10928256 | rs10935184 | rs10941418 |
| rs10891564 | rs10896636 | rs10903343 | rs10912872 | rs10919383  | rs10928512 | rs10935185 | rs10941433 |
| rs10891630 | rs10896794 | rs10903772 | rs10913112 | rs10919387  | rs10928827 | rs10935186 | rs10941679 |
| rs10891700 | rs10896795 | rs10904089 | rs10913118 | rs10919388  | rs10929301 | rs10935316 | rs10941851 |
| rs10892151 | rs10896816 | rs10904908 | rs10913160 | rs10919410  | rs10929302 | rs10935465 | rs10942267 |
| rs10892173 | rs10896972 | rs10905065 | rs10913200 | rs10919411  | rs10929355 | rs10935473 | rs10942300 |
| rs10892258 | rs10897164 | rs10905284 | rs10913213 | rs10919435  | rs10929386 | rs10935478 | rs10942474 |
| rs10892279 | rs10897221 | rs10905359 | rs10913420 | rs10919449  | rs10929547 | rs10935480 | rs10942529 |
| rs10892296 | rs10897275 | rs10905461 | rs10913469 | rs10919470  | rs10929757 | rs10935496 | rs10942549 |
| rs10892299 | rs10897473 | rs10905619 | rs10913568 | rs10919543  | rs10929925 | rs10935733 | rs10942580 |
| rs10892354 | rs10897518 | rs10905638 | rs10913737 | rs10919544  | rs1093     | rs10935779 | rs10942621 |
| rs10892501 | rs10898041 | rs10905682 | rs10913934 | rs10919585  | rs10930008 | rs10936584 | rs10942863 |
| rs10892566 | rs10898438 | rs10905716 | rs10914144 | rs10919593  | rs10930011 | rs10936588 | rs10943130 |
| rs10892761 | rs10898440 | rs10905718 | rs10914269 | rs10919604  | rs10930013 | rs10936599 | rs10943249 |
| rs10892798 | rs10898646 | rs10905770 | rs10914457 | rs10919759  | rs10930114 | rs10936600 | rs10943588 |
| rs10892806 | rs10898811 | rs10906115 | rs10914462 | rs10919774  | rs10930337 | rs10936601 | rs10943605 |
| rs10892807 | rs10898864 | rs10906115 | rs10914462 | rs10919774  | rs10930337 | rs10936602 | rs10944    |
| rs10892807 | rs10898864 | rs10906209 | rs10914505 | rs10919791  | rs10930482 | rs10936602 | rs10944    |
| rs10892873 | rs10898940 | rs10906391 | rs10914684 | rs10919882  | rs10930502 | rs10936632 | rs10944479 |
| rs10892924 | rs10898979 | rs10906850 | rs10915188 | rs10919908  | rs10930597 | rs10936664 | rs10944696 |
| rs10893002 | rs10899133 | rs10906913 | rs10915189 | rs10920205  | rs10930662 | rs10936684 | rs10945141 |
| rs10893348 | rs10899279 | rs10906923 | rs10915216 | rs10920250  | rs10930758 | rs10936702 | rs10945540 |
| rs10893424 | rs10899282 | rs10906926 | rs10915222 | rs10920352  | rs10930763 | rs10936767 | rs10945840 |
| rs10893499 | rs10899283 | rs10906982 | rs10915225 | rs10920578  | rs10930831 | rs10936879 | rs10946313 |
| rs10893506 | rs10899415 | rs10907212 | rs10915437 | rs10920654  | rs10930948 | rs10937094 | rs10946364 |
| rs10893507 | rs10899469 | rs109077   | rs10915840 | rs10920678  | rs10930969 | rs10937101 | rs10946398 |
| rs10893557 | rs10899489 | rs10908278 | rs10916082 | rs10920828  | rs10931256 | rs10937104 | rs10946458 |
| rs10893812 | rs10899490 | rs10908366 | rs10916174 | rs10921288  | rs10931284 | rs10937153 | rs10946506 |
| rs10893823 | rs10899501 | rs10908419 | rs10916239 | rs10921744  | rs10931468 | rs10937208 | rs10946507 |
| rs10893829 | rs10899551 | rs10908458 | rs10916606 | rs10922109  | rs10931821 | rs10937240 | rs109467   |
| rs10893844 | rs10899789 | rs10908465 | rs10916617 | rs10922153  | rs10931831 | rs10937241 | rs10946808 |
| rs10893845 | rs10900027 | rs10908474 | rs10916780 | rs10922162  | rs10931898 | rs10937273 | rs10946817 |
| rs10893876 | rs10900457 | rs10908504 | rs10916784 | rs10922200  | rs10931933 | rs10937275 | rs10946940 |
| rs10893909 | rs10900460 | rs10908505 | rs10916805 | rs10922244  | rs10931936 | rs10937319 | rs10947050 |
| rs10893946 | rs10900568 | rs10908557 | rs10916866 | rs10922300  | rs10931982 | rs10937329 | rs10947260 |
| rs10894020 | rs10900585 | rs10908733 | rs10916892 | rs10922478  | rs10932008 | rs10937405 | rs10947261 |
| rs10894192 | rs10900586 | rs10908819 | rs10916951 | rs10922502  | rs10932679 | rs10937625 | rs10947262 |
| rs10894196 | rs10900807 | rs10908900 | rs10917002 | rs10922532  | rs10932688 | rs10937721 | rs10947428 |
| rs10894308 | rs10900828 | rs10908948 | rs10917111 | rs10922907  | rs10932765 | rs10937763 | rs10947439 |
| rs10894670 | rs10900901 | rs10909912 | rs10917123 | rs10923038  | rs10932837 | rs10937764 | rs10947452 |
| rs10894762 | rs10900944 | rs10909942 | rs10917151 | rs10923354  | rs10933    | rs10937778 | rs10947487 |
| rs10894986 | rs10901057 | rs10910    | rs10917152 | rs10923397  | rs10933068 | rs10937913 | rs10947543 |
| rs10895001 | rs1090107  | rs10910028 | rs10917165 | rs10923398  | rs10933152 | rs10937921 | rs10947552 |

|            |            |            |            |            |            |            |            |
|------------|------------|------------|------------|------------|------------|------------|------------|
| rs10947690 | rs10953957 | rs10961195 | rs10972012 | rs10981925 | rs10991455 | rs10996426 | rs11009678 |
| rs10947786 | rs10954160 | rs10961430 | rs10972076 | rs10982007 | rs10991473 | rs10996430 | rs11009904 |
| rs10947789 | rs10954214 | rs10961468 | rs10972159 | rs10982156 | rs10991814 | rs10997813 | rs11010013 |
| rs10947793 | rs10954300 | rs10962    | rs10972297 | rs10982192 | rs10991823 | rs10997819 | rs11010067 |
| rs10947987 | rs10954312 | rs10962279 | rs1097234  | rs10982456 | rs10992    | rs10997847 | rs11010084 |
| rs10947997 | rs10954428 | rs10962461 | rs10972561 | rs10982544 | rs10992394 | rs10997940 | rs11010134 |
| rs10948011 | rs10954442 | rs10962474 | rs10973159 | rs10982622 | rs10992396 | rs10997975 | rs11010181 |
| rs10948036 | rs10954464 | rs10962547 | rs10973160 | rs10982755 | rs10992408 | rs10997979 | rs11010905 |
| rs10948059 | rs1095461  | rs10962568 | rs10973207 | rs10982910 | rs10992433 | rs10998009 | rs11012732 |
| rs10948071 | rs10954750 | rs10962599 | rs10973267 | rs10983184 | rs10992437 | rs10998018 | rs11012737 |
| rs10948100 | rs10954772 | rs10962612 | rs10973700 | rs10983204 | rs10992447 | rs10998036 | rs11012750 |
| rs10948155 | rs10954779 | rs10962638 | rs10974256 | rs10983324 | rs10992489 | rs10998203 | rs1101330  |
| rs10948172 | rs10954935 | rs10962680 | rs10974344 | rs10983778 | rs10992569 | rs10998288 | rs11013381 |
| rs10948222 | rs10954968 | rs10962692 | rs10974345 | rs10983783 | rs10992580 | rs10998304 | rs11014001 |
| rs10948363 | rs10954993 | rs10962767 | rs10974399 | rs10984237 | rs10992729 | rs10998338 | rs11014154 |
| rs10948499 | rs10955269 | rs10963012 | rs10974406 | rs10984444 | rs10992746 | rs10998356 | rs11014166 |
| rs10948567 | rs10955403 | rs10963067 | rs10974438 | rs10984445 | rs10992751 | rs10998362 | rs11014204 |
| rs10948615 | rs10955473 | rs10963680 | rs10974483 | rs10984466 | rs10992756 | rs10998535 | rs11014267 |
| rs10948674 | rs10955647 | rs1096389  | rs10974716 | rs10984499 | rs10992797 | rs10998624 | rs11014271 |
| rs10948917 | rs10955991 | rs10963942 | rs10974808 | rs10984700 | rs10992800 | rs10998647 | rs11014285 |
| rs10949263 | rs10955992 | rs10964221 | rs10974944 | rs10984732 | rs10992806 | rs10998648 | rs11014291 |
| rs10949304 | rs10956252 | rs10964603 | rs10975385 | rs10984756 | rs10992853 | rs10998832 | rs11014296 |
| rs10949482 | rs1095626  | rs10964620 | rs10975413 | rs10984807 | rs10992867 | rs10999147 | rs11015020 |
| rs10949662 | rs10956401 | rs10964681 | rs10975416 | rs10985070 | rs10993017 | rs10999439 | rs11015098 |
| rs10950289 | rs10956403 | rs10964704 | rs10975479 | rs10985343 | rs10993072 | rs10999573 | rs11015260 |
| rs10950390 | rs10956412 | rs10965235 | rs10975488 | rs10985344 | rs10993370 | rs10999992 | rs11015535 |
| rs10950393 | rs10956483 | rs10965243 | rs10975660 | rs10985348 | rs10993397 | rs11000060 | rs1101557  |
| rs10950398 | rs10956525 | rs10965246 | rs10976689 | rs10985349 | rs10993909 | rs11000448 | rs11015890 |
| rs10950415 | rs10956675 | rs10965247 | rs10976942 | rs10985402 | rs10993994 | rs11000468 | rs11017740 |
| rs10950456 | rs10956677 | rs10965248 | rs10977524 | rs10985420 | rs10994278 | rs11000752 | rs11017772 |
| rs10950641 | rs10956797 | rs10965250 | rs1097784  | rs10985827 | rs10994299 | rs11000760 | rs11018488 |
| rs10950673 | rs10956805 | rs10965258 | rs10978335 | rs10985915 | rs10994318 | rs11000785 | rs11018623 |
| rs10950690 | rs10956808 | rs10965545 | rs10978430 | rs10985968 | rs10994336 | rs11000993 | rs11018670 |
| rs10950819 | rs10956924 | rs10965780 | rs10978435 | rs10985979 | rs10994359 | rs11001051 | rs11018874 |
| rs10950947 | rs10956934 | rs10965781 | rs10978543 | rs10986018 | rs10994397 | rs11001274 | rs11018904 |
| rs10950949 | rs10956941 | rs10965787 | rs10978550 | rs10986087 | rs10994415 | rs11001276 | rs11019128 |
| rs10950995 | rs10956974 | rs10965793 | rs10978677 | rs10986157 | rs10994448 | rs11001278 | rs11019290 |
| rs10951042 | rs10957054 | rs10965796 | rs10978698 | rs10986291 | rs10994707 | rs11001397 | rs11019401 |
| rs10951130 | rs10957156 | rs10965816 | rs10978836 | rs10986311 | rs10994754 | rs11001477 | rs11019658 |
| rs10951154 | rs10957159 | rs10965828 | rs10979182 | rs10986320 | rs10994777 | rs11001639 | rs11019759 |
| rs10951155 | rs10957177 | rs10965935 | rs10979314 | rs10986338 | rs10994830 | rs11001667 | rs1101999  |
| rs10951191 | rs10957266 | rs10965947 | rs10979330 | rs10986578 | rs10994856 | rs11001765 | rs11020114 |
| rs10951325 | rs10957494 | rs10966092 | rs10979613 | rs10986983 | rs10994860 | rs11001783 | rs11020468 |
| rs10951590 | rs10957978 | rs10966119 | rs10980037 | rs10987006 | rs10994920 | rs11001819 | rs1102077  |
| rs10951594 | rs10957979 | rs10967100 | rs10980457 | rs10987008 | rs10994943 | rs11001963 | rs11021221 |
| rs1095163  | rs10957985 | rs10967131 | rs10980517 | rs1098708  | rs10995190 | rs11001981 | rs11021232 |
| rs10951878 | rs10958409 | rs10967509 | rs10980607 | rs10987265 | rs10995193 | rs11002309 | rs11021432 |
| rs10951983 | rs10958476 | rs10967921 | rs10980623 | rs10987266 | rs10995201 | rs11002319 | rs11021504 |
| rs10951992 | rs10958704 | rs10968576 | rs10980628 | rs10987373 | rs10995225 | rs11002791 | rs11022114 |
| rs10952199 | rs10958717 | rs10968577 | rs10980770 | rs10987787 | rs10995240 | rs11002846 | rs11022119 |
| rs10952242 | rs10959554 | rs10969143 | rs10980797 | rs10987827 | rs10995245 | rs11002936 | rs11022130 |
| rs10952302 | rs10959560 | rs10969298 | rs10980799 | rs10987830 | rs10995246 | rs11002954 | rs11022177 |
| rs10952780 | rs10959745 | rs10969334 | rs10980800 | rs10988105 | rs10995248 | rs11003047 | rs11022463 |
| rs10952927 | rs10959753 | rs10969352 | rs10980802 | rs10988207 | rs10995249 | rs11003048 | rs11022505 |
| rs10953082 | rs10959767 | rs10969913 | rs10980854 | rs10988217 | rs10995251 | rs11003118 | rs11022717 |
| rs10953083 | rs10959797 | rs10969994 | rs10980921 | rs10988239 | rs10995255 | rs11003438 | rs11022718 |
| rs10953137 | rs10959813 | rs10970305 | rs10980922 | rs10988442 | rs10995271 | rs11003463 | rs11022719 |
| rs10953292 | rs10959826 | rs10970595 | rs10980926 | rs10988763 | rs10995307 | rs1100396  | rs11022734 |
| rs10953298 | rs10959883 | rs10970975 | rs1098098  | rs10988775 | rs10995311 | rs11004183 | rs11022756 |
| rs10953299 | rs10959913 | rs10970979 | rs1098099  | rs10989692 | rs10995312 | rs11006237 | rs11022762 |
| rs10953388 | rs10960067 | rs10971420 | rs10981012 | rs10990303 | rs10995316 | rs11006489 | rs11023018 |
| rs10953541 | rs10960103 | rs10971434 | rs10981250 | rs10990535 | rs10995426 | rs11006752 | rs11023056 |
| rs10953577 | rs10960276 | rs10971721 | rs10981723 | rs10990610 | rs10995427 | rs11006832 | rs11023139 |
| rs109536   | rs10960303 | rs10971767 | rs10981820 | rs10990975 | rs10995477 | rs11006914 | rs11023199 |
| rs10953733 | rs10960710 | rs10971921 | rs10981834 | rs10991421 | rs10995505 | rs11007604 | rs11023332 |
| rs10953765 | rs10960765 | rs10971930 | rs10981835 | rs10991433 | rs10995639 | rs11008355 | rs11023379 |
| rs10953766 | rs10960914 | rs10971957 | rs10981922 | rs10991437 | rs10996167 | rs11009262 | rs11023435 |

|            |            |            |            |            |            |            |            |
|------------|------------|------------|------------|------------|------------|------------|------------|
| rs11023703 | rs11031436 | rs11043003 | rs11052877 | rs11060180 | rs11066707 | rs11072811 | rs11078724 |
| rs11023719 | rs11031731 | rs11043207 | rs1105291  | rs11060344 | rs11066971 | rs11072996 | rs11078770 |
| rs11023722 | rs11031736 | rs11043221 | rs1105307  | rs11060406 | rs11067145 | rs11073058 | rs11078776 |
| rs11023759 | rs11032362 | rs11043280 | rs11053801 | rs1106090  | rs11067211 | rs11073060 | rs11078893 |
| rs11023764 | rs11033388 | rs11044430 | rs11053802 | rs1106095  | rs11067228 | rs11073147 | rs11078916 |
| rs11023784 | rs11033892 | rs11044463 | rs11054531 | rs11061269 | rs11067231 | rs11073328 | rs11078917 |
| rs11023881 | rs11033898 | rs11044990 | rs11054861 | rs11061615 | rs11067264 | rs11073333 | rs11078927 |
| rs11023888 | rs11035295 | rs11044991 | rs11054898 | rs11061814 | rs11067278 | rs11073337 | rs11079018 |
| rs11023895 | rs11036238 | rs11045000 | rs11054914 | rs11062070 | rs11067376 | rs11073383 | rs11079035 |
| rs11023906 | rs11036413 | rs11045163 | rs11055030 | rs11062091 | rs11067592 | rs1107345  | rs11079041 |
| rs11023910 | rs11036562 | rs11045171 | rs11055034 | rs11062102 | rs1106761  | rs11073747 | rs1107910  |
| rs11023922 | rs11036663 | rs11045172 | rs11055176 | rs11062103 | rs1106766  | rs11073930 | rs11079166 |
| rs11023926 | rs11037258 | rs11045235 | rs11055177 | rs11062162 | rs11067762 | rs11073953 | rs11079173 |
| rs11024008 | rs11037404 | rs11045293 | rs11055215 | rs11062167 | rs11067763 | rs11074135 | rs11079341 |
| rs11024028 | rs11037464 | rs11045347 | rs1105527  | rs11062386 | rs11067773 | rs11074258 | rs11079419 |
| rs11024074 | rs11037685 | rs11045611 | rs11055602 | rs1106241  | rs11067829 | rs11074446 | rs11079428 |
| rs11024102 | rs11037728 | rs11045879 | rs11055887 | rs1106243  | rs11067904 | rs11074547 | rs11079480 |
| rs11024110 | rs11037975 | rs11045886 | rs11055888 | rs11062517 | rs11068059 | rs11074779 | rs1107960  |
| rs11024256 | rs11038065 | rs1104608  | rs11055965 | rs1106287  | rs11068372 | rs11075041 | rs11079685 |
| rs11024451 | rs11038167 | rs11046164 | rs11055966 | rs11062908 | rs1106841  | rs11075253 | rs11079718 |
| rs11024458 | rs11038357 | rs11046170 | rs11055980 | rs11063028 | rs1106859  | rs11075489 | rs11079727 |
| rs11024616 | rs11038391 | rs11046766 | rs11055989 | rs11063069 | rs1106863  | rs11075624 | rs11079784 |
| rs11024735 | rs11038428 | rs11047132 | rs11055991 | rs11063193 | rs11068852 | rs11075747 | rs11079786 |
| rs11024743 | rs11038672 | rs11047139 | rs11056314 | rs11063544 | rs11068917 | rs11075779 | rs11079788 |
| rs11025062 | rs11038913 | rs11047198 | rs11056375 | rs1106357  | rs1106908  | rs11075924 | rs11079810 |
| rs11025185 | rs11038927 | rs11047224 | rs1105654  | rs1106363  | rs11070162 | rs11075985 | rs11079849 |
| rs11025521 | rs11039149 | rs11047225 | rs11056875 | rs11064010 | rs11070165 | rs11075990 | rs11079853 |
| rs11025608 | rs11039182 | rs11047237 | rs11057005 | rs11064157 | rs11070172 | rs11075992 | rs11079868 |
| rs11025640 | rs11039216 | rs11047261 | rs11057065 | rs11064321 | rs11070185 | rs11075995 | rs11079872 |
| rs11026407 | rs11039221 | rs11047447 | rs11057071 | rs11064437 | rs11070197 | rs11076146 | rs11079936 |
| rs11026578 | rs11039265 | rs11047498 | rs11057081 | rs11064498 | rs11070231 | rs11076174 | rs11079993 |
| rs11026585 | rs11039266 | rs11047543 | rs11057214 | rs11064687 | rs11070332 | rs11076175 | rs11080055 |
| rs11026586 | rs11039297 | rs11048425 | rs11057353 | rs1106476  | rs11070529 | rs11076176 | rs11080090 |
| rs1102705  | rs11039308 | rs11048456 | rs11057354 | rs11064881 | rs11070811 | rs11076194 | rs11080107 |
| rs1102713  | rs11039355 | rs11048457 | rs11057390 | rs11065050 | rs11070814 | rs1107643  | rs11080134 |
| rs11027827 | rs11039364 | rs11048458 | rs11057393 | rs11065231 | rs11071027 | rs11076515 | rs11080150 |
| rs11027857 | rs11039389 | rs11048463 | rs11057396 | rs11065286 | rs11071371 | rs11076614 | rs11080369 |
| rs1102934  | rs11039391 | rs11048470 | rs11057397 | rs1106529  | rs11071558 | rs1107677  | rs1108048  |
| rs11029901 | rs11039409 | rs11048516 | rs11057401 | rs11065365 | rs11071559 | rs11076805 | rs1108130  |
| rs11029977 | rs11039436 | rs1104859  | rs11057405 | rs11065381 | rs1107162  | rs11076849 | rs11081483 |
| rs11030003 | rs11039448 | rs1104888  | rs11057408 | rs11065384 | rs11071657 | rs11076856 | rs11081529 |
| rs11030022 | rs11039798 | rs11049131 | rs11057413 | rs11065589 | rs11071720 | rs11076962 | rs1108167  |
| rs11030023 | rs11040204 | rs11049136 | rs11057418 | rs11065568 | rs11071723 | rs11077203 | rs11081761 |
| rs11030024 | rs11040333 | rs11049204 | rs11057429 | rs11065756 | rs11071733 | rs11077206 | rs11081818 |
| rs11030060 | rs11040595 | rs11049211 | rs11057450 | rs11065783 | rs11071738 | rs11077207 | rs11082011 |
| rs11030084 | rs11040813 | rs11049231 | rs11057468 | rs11065822 | rs11071896 | rs11077343 | rs11082051 |
| rs11030088 | rs11041426 | rs11049328 | rs11057491 | rs11065904 | rs11071939 | rs11077359 | rs11082082 |
| rs11030099 | rs11041699 | rs11049365 | rs11057553 | rs11065961 | rs11071975 | rs11077363 | rs11082304 |
| rs11030100 | rs110419   | rs11049386 | rs11057830 | rs11065979 | rs11072230 | rs11077397 | rs11082383 |
| rs11030102 | rs11042023 | rs11049506 | rs11057839 | rs11065987 | rs11072332 | rs11077400 | rs11082385 |
| rs11030104 | rs11042026 | rs11049566 | rs11057840 | rs11065991 | rs11072384 | rs11077539 | rs11082394 |
| rs11030107 | rs11042055 | rs11049605 | rs11057841 | rs11066001 | rs11072405 | rs11077711 | rs11082395 |
| rs11030108 | rs11042075 | rs11049611 | rs1105813  | rs11066008 | rs11072450 | rs11077783 | rs11082396 |
| rs11030112 | rs11042093 | rs11049711 | rs11058322 | rs11066015 | rs11072467 | rs11077815 | rs11082416 |
| rs11030119 | rs11042512 | rs11049727 | rs1105881  | rs11066150 | rs11072494 | rs11077816 | rs11082430 |
| rs11030122 | rs11042524 | rs11049733 | rs1105889  | rs11066188 | rs11072508 | rs11077961 | rs11082498 |
| rs11030282 | rs11042561 | rs11049890 | rs11059094 | rs11066207 | rs11072516 | rs11077998 | rs11082500 |
| rs11030967 | rs11042596 | rs11049943 | rs11059476 | rs11066280 | rs11072518 | rs11078288 | rs11082512 |
| rs11030976 | rs11042602 | rs11049944 | rs1105955  | rs11066283 | rs11072526 | rs11078333 | rs11082513 |
| rs11030980 | rs11042662 | rs11051005 | rs1105956  | rs11066284 | rs11072541 | rs11078446 | rs11082518 |
| rs11031002 | rs11042685 | rs11051048 | rs11059583 | rs11066301 | rs11072566 | rs1107850  | rs11082671 |
| rs11031005 | rs11042811 | rs11051052 | rs11059617 | rs11066309 | rs11072567 | rs11078559 | rs11082764 |
| rs11031006 | rs11042841 | rs11051061 | rs11059675 | rs11066320 | rs11072662 | rs11078594 | rs11082953 |
| rs11031051 | rs11042846 | rs11052036 | rs11059753 | rs11066325 | rs11072763 | rs11078597 | rs11083092 |
| rs11031096 | rs11042902 | rs1105223  | rs11059919 | rs11066390 | rs11072785 | rs11078696 | rs11083166 |
| rs11031122 | rs11042906 | rs11052689 | rs11059927 | rs11066453 | rs11072790 | rs1107871  | rs11083241 |
| rs11031191 | rs11042937 | rs11052754 | rs11060112 | rs11066591 | rs11072791 | rs11078713 | rs11083244 |

|            |            |             |             |             |             |             |             |
|------------|------------|-------------|-------------|-------------|-------------|-------------|-------------|
| rs11083258 | rs1109442  | rs11102809  | rs11111274  | rs11121177  | rs111250433 | rs11128901  | rs11135030  |
| rs11083300 | rs1109480  | rs11102916  | rs11111293  | rs11121210  | rs11125071  | rs111289888 | rs11135046  |
| rs11083411 | rs1109559  | rs11102974  | rs11111315  | rs11121240  | rs11125102  | rs11129078  | rs11135056  |
| rs1108343  | rs1109605  | rs11103377  | rs11111679  | rs11121242  | rs111251130 | rs111290813 | rs111350935 |
| rs11083743 | rs11096128 | rs11103379  | rs11111707  | rs11121246  | rs111251222 | rs11129127  | rs111352324 |
| rs11083766 | rs1109618  | rs11103381  | rs1111179   | rs11121483  | rs11125163  | rs11129176  | rs111352680 |
| rs11083767 | rs11096402 | rs11103387  | rs1111180   | rs11121529  | rs11125166  | rs11129295  | rs11135349  |
| rs11083779 | rs11096542 | rs1110339   | rs11111869  | rs11121542  | rs11125180  | rs111294930 | rs111353859 |
| rs11083840 | rs11096640 | rs11103602  | rs11112548  | rs11121589  | rs11125333  | rs11129657  | rs11135441  |
| rs11083846 | rs11096659 | rs11103604  | rs1111258   | rs11121599  | rs111253602 | rs111296842 | rs111354805 |
| rs11083862 | rs11096778 | rs11103631  | rs11112715  | rs11121615  | rs11125529  | rs11129708  | rs111355438 |
| rs11084096 | rs11096954 | rs11103667  | rs11113011  | rs1112174   | rs11125548  | rs11129735  | rs11135694  |
| rs11084110 | rs11097044 | rs1110400   | rs11113071  | rs111217601 | rs11125553  | rs11129743  | rs11135695  |
| rs11084545 | rs11097170 | rs1110446   | rs1111336   | rs11121845  | rs11125609  | rs111297471 | rs11135740  |
| rs11084553 | rs11097236 | rs1110464   | rs1111341   | rs11121854  | rs11125721  | rs11129795  | rs11135910  |
| rs11084596 | rs11097414 | rs11104733  | rs11113776  | rs1112195   | rs111257433 | rs11130     | rs11135939  |
| rs11084689 | rs1109748  | rs11104852  | rs11114001  | rs11122142  | rs11125803  | rs11130112  | rs11136000  |
| rs11084753 | rs11097592 | rs11104870  | rs11114010  | rs11122174  | rs111258505 | rs11130181  | rs11136097  |
| rs11084888 | rs11097631 | rs11104881  | rs11114042  | rs11122219  | rs11125871  | rs11130194  | rs111362352 |
| rs11085020 | rs1109768  | rs1110494   | rs11114650  | rs11122272  | rs11125927  | rs11130206  | rs11136280  |
| rs11085094 | rs11097683 | rs11104986  | rs11114787  | rs11122449  | rs11125949  | rs11130222  | rs111363146 |
| rs1108548  | rs11097685 | rs1110508   | rs11115     | rs11122450  | rs111260184 | rs11130226  | rs11136341  |
| rs11085720 | rs11097693 | rs11105213  | rs11115056  | rs11122454  | rs11126034  | rs11130306  | rs11136344  |
| rs11085725 | rs11097787 | rs11105298  | rs11115117  | rs11122573  | rs11126082  | rs11130319  | rs111364339 |
| rs11085727 | rs11097789 | rs11105306  | rs11115160  | rs111226181 | rs111261826 | rs11130380  | rs111365807 |
| rs11085744 | rs11097861 | rs11105326  | rs11115176  | rs111228444 | rs11126228  | rs11130381  | rs111366116 |
| rs1108581  | rs11097881 | rs11105352  | rs1111571   | rs11123030  | rs1112629   | rs111304266 | rs111366249 |
| rs11085824 | rs11097978 | rs11105354  | rs11117364  | rs11123155  | rs11126331  | rs111304587 | rs11136775  |
| rs11086023 | rs11098063 | rs11105364  | rs111173978 | rs111231601 | rs11126396  | rs11130612  | rs111368727 |
| rs11086029 | rs11098196 | rs11105377  | rs11117401  | rs11123169  | rs11126424  | rs11130638  | rs11136965  |
| rs11086054 | rs11098259 | rs11105380  | rs111174163 | rs11123170  | rs111265125 | rs111307654 | rs111370527 |
| rs11086102 | rs11098403 | rs1110542   | rs11117420  | rs11123201  | rs11126598  | rs111307712 | rs11137087  |
| rs11086146 | rs11098676 | rs1110544   | rs11117431  | rs11123302  | rs11126666  | rs11130793  | rs111371454 |
| rs1108618  | rs11098699 | rs11105466  | rs11117432  | rs11123406  | rs111267073 | rs11130981  | rs111371822 |
| rs11086556 | rs11098739 | rs11105468  | rs11117433  | rs111235329 | rs11126784  | rs11130982  | rs111371860 |
| rs11086957 | rs11098964 | rs11105475  | rs11117615  | rs111235962 | rs11126822  | rs111312615 | rs111373852 |
| rs1108732  | rs11099097 | rs11105799  | rs11117646  | rs11123694  | rs111269058 | rs111318529 | rs111376517 |
| rs11087326 | rs11099098 | rs11105839  | rs11117758  | rs111237020 | rs11126989  | rs11131920  | rs11137820  |
| rs11087368 | rs11099412 | rs11106430  | rs11117781  | rs11123804  | rs111270317 | rs111321694 | rs11137850  |
| rs11087515 | rs11099476 | rs111066798 | rs1111818   | rs11123810  | rs11127043  | rs111326718 | rs111379368 |
| rs11087740 | rs11099493 | rs11106863  | rs11118304  | rs11123811  | rs11127048  | rs111327216 | rs111379782 |
| rs11087784 | rs11099565 | rs1110698   | rs11118310  | rs11123816  | rs11127126  | rs111328885 | rs111381449 |
| rs11088302 | rs11099675 | rs11106995  | rs11118316  | rs11123820  | rs11127153  | rs1113295   | rs11138286  |
| rs11088304 | rs11099697 | rs11106996  | rs11118320  | rs11123825  | rs11127178  | rs111331197 | rs11138311  |
| rs11088309 | rs11100083 | rs11107001  | rs11118346  | rs11123857  | rs11127186  | rs11133474  | rs11138313  |
| rs11088317 | rs11100237 | rs1110701   | rs11118367  | rs11123926  | rs111271889 | rs11133613  | rs11138664  |
| rs11088397 | rs11100307 | rs11107116  | rs11118406  | rs11124063  | rs11127261  | rs11133665  | rs111386720 |
| rs1108842  | rs11100449 | rs11107120  | rs11118555  | rs11124066  | rs111273322 | rs111337204 | rs111386834 |
| rs11088458 | rs11100606 | rs11107124  | rs1111875   | rs111240785 | rs11127417  | rs111337717 | rs11138885  |
| rs11088590 | rs11100781 | rs11107184  | rs1111890   | rs11124101  | rs11127485  | rs111338114 | rs11138902  |
| rs11088751 | rs11100814 | rs111072793 | rs11119208  | rs111241709 | rs11127493  | rs111338191 | rs11138947  |
| rs1108879  | rs11100830 | rs11107903  | rs11119256  | rs11124272  | rs11127656  | rs111342015 | rs111390579 |
| rs11088859 | rs11100860 | rs11107909  | rs11119283  | rs11124308  | rs111278892 | rs111342256 | rs111391498 |
| rs11088991 | rs11100870 | rs11108056  | rs11119337  | rs11124319  | rs11127893  | rs11134475  | rs111392859 |
| rs1108902  | rs11101061 | rs11108061  | rs11119341  | rs11124322  | rs111279592 | rs111344982 | rs11139497  |
| rs11089620 | rs11101263 | rs11108094  | rs11119409  | rs11124501  | rs11128058  | rs11134512  | rs11139596  |
| rs11089637 | rs11101682 | rs11108175  | rs11119421  | rs111245230 | rs111281351 | rs111345185 | rs11139622  |
| rs11089671 | rs11101730 | rs11108209  | rs11119633  | rs11124554  | rs11128203  | rs111345531 | rs111398992 |
| rs11090039 | rs1110195  | rs11108272  | rs11119784  | rs111246591 | rs11128212  | rs111345639 | rs11140055  |
| rs11090045 | rs11102024 | rs11109072  | rs11119805  | rs111246699 | rs11128264  | rs111346133 | rs111401421 |
| rs1109027  | rs11102089 | rs11109097  | rs11119893  | rs111246959 | rs111283203 | rs11134672  | rs111402121 |
| rs1109088  | rs11102143 | rs11109811  | rs11120062  | rs111248619 | rs111283466 | rs11134679  | rs111403728 |
| rs1109151  | rs11102518 | rs11109815  | rs11120218  | rs11124924  | rs111283523 | rs11134709  | rs111404218 |
| rs1109166  | rs1110258  | rs11111026  | rs111205626 | rs11124926  | rs111286706 | rs11134766  | rs111408305 |
| rs11092455 | rs1110275  | rs11111090  | rs11121012  | rs11124930  | rs11128722  | rs11134789  | rs111409240 |
| rs11093404 | rs11102800 | rs11111094  | rs11121022  | rs11124931  | rs11128761  | rs111350029 | rs111412755 |
| rs1109430  | rs11102807 | rs11111197  | rs11121129  | rs11124981  | rs111288118 | rs11135015  | rs11141731  |

|             |                  |             |             |             |             |             |             |
|-------------|------------------|-------------|-------------|-------------|-------------|-------------|-------------|
| rs11142263  | rs1115019        | rs11154801  | rs111599092 | rs111650759 | rs11170445  | rs11175835  | rs111821611 |
| rs11142387  | rs11150296       | rs11154851  | rs11159989  | rs111652004 | rs11170468  | rs11175849  | rs11182428  |
| rs11142400  | rs111503800      | rs111549985 | rs11160010  | rs111653425 | rs11170469  | rs11175854  | rs111824905 |
| rs11142425  | rs11150461       | rs111550108 | rs11160033  | rs11165468  | rs11170481  | rs11175898  | rs111825282 |
| rs11142444  | rs11150462       | rs111550283 | rs11160037  | rs11165528  | rs11170516  | rs11175904  | rs111825958 |
| rs11142464  | rs11150562       | rs11155073  | rs11160044  | rs11165623  | rs11170517  | rs111759324 | rs111827672 |
| rs111428477 | rs11150582       | rs11155076  | rs11160085  | rs11165643  | rs11170530  | rs11175968  | rs111828205 |
| rs111430023 | rs11150589       | rs111551994 | rs11160119  | rs11165655  | rs11170538  | rs11176001  | rs11182930  |
| rs111430484 | rs11150601       | rs111551996 | rs11160165  | rs11165687  | rs11170594  | rs11176010  | rs11183201  |
| rs11143067  | rs11150606       | rs111552633 | rs11160190  | rs11165787  | rs11170624  | rs11176015  | rs111837003 |
| rs111431452 | rs11150612       | rs1115535   | rs11160318  | rs11165867  | rs111706465 | rs111763437 | rs111841386 |
| rs111433752 | rs111506224      | rs11155591  | rs111604275 | rs11165924  | rs11170652  | rs111763724 | rs111842178 |
| rs111435864 | rs11150623       | rs11155671  | rs111605422 | rs11165934  | rs11170678  | rs111765639 | rs111843364 |
| rs111437842 | rs11150745       | rs11155675  | rs11160546  | rs111660650 | rs11170776  | rs11176664  | rs111843862 |
| rs11143858  | rs111508230      | rs1115569   | rs11160570  | rs111663960 | rs11170820  | rs111767734 | rs111844913 |
| rs111439095 | rs111508783      | rs111557465 | rs11160601  | rs11166440  | rs11170829  | rs111768603 | rs11184769  |
| rs111439884 | rs1115091        | rs11155787  | rs11160706  | rs11166628  | rs111714577 | rs11176927  | rs111849006 |
| rs11144134  | rs1115163        | rs11155804  | rs11160752  | rs111668293 | rs1117152   | rs11177     | rs11184940  |
| rs111443054 | rs111516300      | rs11155813  | rs11160753  | rs1116690   | rs11171710  | rs11177053  | rs11184946  |
| rs111444407 | rs111520052      | rs11155821  | rs11160767  | rs111669836 | rs11171731  | rs111770942 | rs11184959  |
| rs11144688  | rs11152089       | rs11156429  | rs11160943  | rs11166986  | rs11171739  | rs11177372  | rs11184985  |
| rs11144779  | rs11152212       | rs11156751  | rs111610121 | rs11167136  | rs11171744  | rs11177378  | rs11184994  |
| rs111447985 | rs11152213       | rs11156905  | rs111610668 | rs11167171  | rs111717711 | rs111775488 | rs111850229 |
| rs111449119 | rs11152236       | rs111569780 | rs111611027 | rs11167260  | rs11171846  | rs11177623  | rs11185092  |
| rs111449836 | rs11152350       | rs111570031 | rs111612372 | rs111675602 | rs11171916  | rs11177672  | rs11185111  |
| rs111450466 | rs11152363       | rs111571253 | rs111612809 | rs111676341 | rs1117199   | rs111777102 | rs111852224 |
| rs11145324  | rs11152375       | rs11157138  | rs11161294  | rs11167642  | rs11172055  | rs11177789  | rs1118543   |
| rs11145376  | rs1115240        | rs11157143  | rs11161318  | rs11167699  | rs11172086  | rs111778408 | rs111854458 |
| rs11145461  | rs111524356      | rs11157436  | rs11161335  | rs11167764  | rs11172113  | rs111778721 | rs11185551  |
| rs11145465  | rs111526888      | rs111577916 | rs11161430  | rs111677654 | rs11172134  | rs1117816   | rs11185602  |
| rs11145488  | rs111527163      | rs11157810  | rs11161465  | rs111678372 | rs111721514 | rs111782145 | rs11185677  |
| rs111455502 | rs111527738      | rs1115784   | rs11161521  | rs111678491 | rs111721712 | rs111782388 | rs111861797 |
| rs111456533 | rs111528363      | rs11157930  | rs11161550  | rs11167891  | rs11172205  | rs111783124 | rs11186433  |
| rs11145656  | rs111528598      | rs11157931  | rs11161620  | rs11167957  | rs111722075 | rs11178393  | rs1118655   |
| rs11145746  | rs111529171      | rs11157953  | rs11161636  | rs11167990  | rs11172247  | rs111784349 | rs11186609  |
| rs11145763  | rs11152989       | rs11158026  | rs11161721  | rs11168036  | rs11172254  | rs11178450  | rs111867185 |
| rs11145807  | rs111530150      | rs11158050  | rs11161771  | rs11168048  | rs111723834 | rs11178469  | rs11186719  |
| rs11145951  | rs11153018       | rs11158159  | rs111618475 | rs11168187  | rs11172791  | rs11178492  | rs11186737  |
| rs11145974  | rs11153046       | rs11158204  | rs111618480 | rs11168244  | rs111730030 | rs111785286 | rs111867612 |
| rs11146014  | rs11153071       | rs11158250  | rs111618861 | rs11168245  | rs111730697 | rs11178610  | rs111869282 |
| rs11146021  | rs11153147       | rs11158303  | rs111619578 | rs11168249  | rs11173340  | rs11178648  | rs11187027  |
| rs11146126  | rs11153159       | rs111584145 | rs11162019  | rs11168254  | rs11173470  | rs11178649  | rs111870938 |
| rs11146304  | rs11153164       | rs11158434  | rs11162296  | rs11168258  | rs11173646  | rs11178737  | rs111871194 |
| rs11146949  | rs11153171       | rs11158519  | rs111623082 | rs111683602 | rs111739590 | rs111789331 | rs11187129  |
| rs111469573 | rs11153279       | rs11158547  | rs11162351  | rs11168516  | rs111740474 | rs111789468 | rs111871296 |
| rs111470210 | rs11153311       | rs11158588  | rs11162437  | rs111685928 | rs111740664 | rs111790405 | rs11187140  |
| rs111470774 | rs11153476       | rs11158592  | rs111626441 | rs11168705  | rs111741722 | rs111791351 | rs11187142  |
| rs111470917 | rs1115363        | rs11158602  | rs111626763 | rs11168839  | rs11174399  | rs111792818 | rs11187144  |
| rs11147235  | rs111536497      | rs11158609  | rs111626885 | rs111688805 | rs111744096 | rs11179317  | rs11187157  |
| rs111475133 | rs11153730       | rs11158716  | rs111630016 | rs11168884  | rs11174620  | rs111793536 | rs11187169  |
| rs111476047 | rs11153730-<br>C | rs11158717  | rs111631066 | rs111688960 | rs11174781  | rs111793843 | rs11187537  |
| rs111478946 |                  | rs11158743  | rs111632154 | rs11168951  | rs11174782  | rs111798871 | rs11187538  |
| rs11148036  | rs111537560      | rs11158763  | rs1116357   | rs111689747 | rs1117490   | rs11180340  | rs111876221 |
| rs11148421  | rs11153822       | rs11158800  | rs111639056 | rs111689944 | rs1117533   | rs111804060 | rs11187742  |
| rs111484648 | rs111538456      | rs11158820  | rs11163933  | rs11169166  | rs11175388  | rs11180609  | rs11187838  |
| rs111485759 | rs11154027       | rs111589530 | rs111639853 | rs11169225  | rs11175398  | rs11180703  | rs11187844  |
| rs111486608 | rs111540621      | rs11158975  | rs11164095  | rs11169302  | rs11175421  | rs11180986  | rs11187938  |
| rs111488606 | rs111541756      | rs11159091  | rs111641876 | rs111693235 | rs11175492  | rs11181001  | rs11187998  |
| rs111489051 | rs11154334       | rs11159096  | rs111642325 | rs11169552  | rs11175593  | rs111810219 | rs11188012  |
| rs11149178  | rs11154343       | rs11159261  | rs111642750 | rs11169572  | rs11175628  | rs111813727 | rs111882035 |
| rs111491984 | rs11154376       | rs111592775 | rs111642997 | rs111696067 | rs11175656  | rs11181613  | rs111882448 |
| rs11149313  | rs111544199      | rs111593386 | rs111643014 | rs11169751  | rs11175702  | rs111818253 | rs11188501  |
| rs11149581  | rs111546134      | rs11159347  | rs111645190 | rs11169926  | rs11175773  | rs11181913  | rs111885446 |
| rs111499603 | rs11154680       | rs11159493  | rs111645729 | rs111700120 | rs111757774 | rs11181939  | rs111885617 |
| rs11150141  | rs11154718       | rs111595456 | rs11164654  | rs11170164  | rs11175781  | rs111820018 | rs11188601  |
| rs11150152  | rs11154720       | rs111598585 | rs11164861  | rs111702909 | rs11175817  | rs111820348 | rs11188604  |
| rs11150189  | rs11154792       | rs111599055 | rs11165052  | rs11170394  | rs11175834  | rs111821073 | rs1118866   |



## Supplemental Online Material

|             |             |             |             |             |             |             |             |
|-------------|-------------|-------------|-------------|-------------|-------------|-------------|-------------|
| rs111887461 | rs11191786  | rs111980473 | rs11203810  | rs11208659  | rs11212620  | rs11217615  | rs112217694 |
| rs111887938 | rs11191801  | rs11198112  | rs11204085  | rs11208662  | rs112126248 | rs112176573 | rs112219838 |
| rs11189038  | rs11191822  | rs111981233 | rs112041531 | rs112086769 | rs112128183 | rs112178027 | rs112220485 |
| rs11189058  | rs11191835  | rs11198821  | rs11204213  | rs11208691  | rs112134147 | rs112178079 | rs11222084  |
| rs11189154  | rs11191841  | rs111988223 | rs11204213a | rs11208700  | rs112134293 | rs11217863  | rs112222327 |
| rs11189156  | rs11191847  | rs11198861  | rs11204266  | rs11208706  | rs112134660 | rs11217874  | rs112222723 |
| rs11189181  | rs11191865  | rs11198898  | rs112043138 | rs11208712  | rs11213482  | rs11217878  | rs112222843 |
| rs111891989 | rs11191871  | rs11199116  | rs11204421  | rs11208719  | rs112139215 | rs11217917  | rs112223196 |
| rs111896171 | rs111919672 | rs1119950   | rs11204523  | rs11208722  | rs11213940  | rs112180569 | rs112223848 |
| rs111896493 | rs1119208   | rs111997645 | rs112045239 | rs11208742  | rs11213941  | rs112180833 | rs11222386  |
| rs111898810 | rs11192147  | rs111997659 | rs11204538  | rs11208757  | rs112140014 | rs112182189 | rs112225170 |
| rs111900181 | rs11192193  | rs11199781  | rs112046403 | rs11208774  | rs11214013  | rs11218343  | rs112226238 |
| rs111901094 | rs11192283  | rs11199835  | rs11204662  | rs11208844  | rs11214037  | rs112184198 | rs11222703  |
| rs11190126  | rs11192347  | rs111998607 | rs11204668  | rs11208920  | rs112140754 | rs11218447  | rs11223204  |
| rs11190127  | rs11192399  | rs11199874  | rs11204677  | rs11209026  | rs112141546 | rs11218510  | rs1122326   |
| rs11190128  | rs11192507  | rs11199878  | rs11204682  | rs11209175  | rs11214200  | rs11218575  | rs112233623 |
| rs11190133  | rs1119257   | rs11199879  | rs11204701  | rs1120924   | rs11214269  | rs11218708  | rs112233856 |
| rs11190134  | rs111926069 | rs1119988   | rs11204702  | rs11209240  | rs112143493 | rs11218720  | rs11223444  |
| rs11190140  | rs111929083 | rs11199907  | rs112047121 | rs112096491 | rs11214413  | rs11218721  | rs11223560  |
| rs11190141  | rs111929228 | rs11199914  | rs11204752  | rs11209718  | rs11214440  | rs11218725  | rs11223581  |
| rs11190164  | rs111929233 | rs11200014  | rs11204762  | rs112097551 | rs11214441  | rs112187368 | rs11223600  |
| rs11190604  | rs111930700 | rs1120004   | rs11204892  | rs11209894  | rs11214447  | rs112187554 | rs11223651  |
| rs1119066   | rs111930714 | rs112001035 | rs11204896  | rs11209928  | rs11214468  | rs112187834 | rs11223656  |
| rs111906841 | rs111931834 | rs11200159  | rs11205006  | rs11209943  | rs11214489  | rs112190116 | rs112238765 |
| rs11190709  | rs111931861 | rs11200509  | rs112050738 | rs11209947  | rs11214589  | rs112190912 | rs112238843 |
| rs11190751  | rs111932385 | rs11200607  | rs11205277  | rs11209948  | rs11214596  | rs112191650 | rs1122405   |
| rs11190846  | rs111933865 | rs112006329 | rs11205303  | rs11209951  | rs11214607  | rs112192770 | rs112241539 |
| rs11190870  | rs111935829 | rs11200638  | rs11205348  | rs11209952  | rs11214609  | rs112196150 | rs11224291  |
| rs111908763 | rs111936426 | rs11200733  | rs11205354  | rs11209970  | rs11214629  | rs112197434 | rs11224292  |
| rs11190955  | rs111937532 | rs112007554 | rs11205539  | rs11209976  | rs112147313 | rs11219769  | rs11224302  |
| rs111909987 | rs111940429 | rs112007639 | rs112056543 | rs11210029  | rs11214775  | rs1121980   | rs11224309  |
| rs111910553 | rs111941366 | rs112008153 | rs11205668  | rs11210187  | rs11215126  | rs11219814  | rs11224314  |
| rs11191156  | rs111942477 | rs112008342 | rs11205761  | rs11210195  | rs112153300 | rs1121985   | rs11224476  |
| rs11191191  | rs111945767 | rs112009435 | rs11205766  | rs11210228  | rs112153762 | rs112199    | rs1122466   |
| rs11191193  | rs111949013 | rs112010353 | rs11205823  | rs11210229  | rs11215400  | rs112201801 | rs112248293 |
| rs11191205  | rs11194997  | rs112011926 | rs11205903  | rs11210274  | rs11215403  | rs11220270  | rs11225024  |
| rs11191237  | rs11195062  | rs112013645 | rs11206132  | rs112103921 | rs112154095 | rs112203773 | rs11225154  |
| rs11191270  | rs11195128  | rs11201507  | rs112062732 | rs11210400  | rs11215498  | rs11220462  | rs1122518   |
| rs11191359  | rs11195154  | rs112017743 | rs11206344  | rs112104755 | rs112158604 | rs11220463  | rs112253053 |
| rs11191379  | rs11195238  | rs112019128 | rs11206374  | rs11210537  | rs11215932  | rs11220465  | rs1122531   |
| rs11191392  | rs111952858 | rs11201942  | rs11206397  | rs112107457 | rs11216126  | rs112204664 | rs112253475 |
| rs11191416  | rs111955202 | rs11201992  | rs112064774 | rs11210834  | rs11216131  | rs11220471  | rs11225434  |
| rs11191419  | rs1119555   | rs11201999  | rs11206510  | rs112108364 | rs11216183  | rs112204826 | rs11225452  |
| rs11191421  | rs111959275 | rs112020835 | rs11206517  | rs11210869  | rs11216199  | rs11220486  | rs112255027 |
| rs11191424  | rs11195945  | rs11202154  | rs11206773  | rs11210871  | rs112162280 | rs11220490  | rs11225547  |
| rs111914382 | rs11195949  | rs11202156  | rs11206788  | rs11210887  | rs11216230  | rs112206797 | rs112256160 |
| rs11191442  | rs11195959  | rs11202345  | rs112069404 | rs11210892  | rs112163620 | rs11220727  | rs112256201 |
| rs111914426 | rs111959637 | rs11202346  | rs112069922 | rs11210935  | rs11216435  | rs11220764  | rs112257498 |
| rs11191447  | rs111960097 | rs11202365  | rs11207162  | rs11210937  | rs11216440  | rs11220776  | rs112259268 |
| rs11191454  | rs11196033  | rs11202439  | rs11207177  | rs11211123  | rs112164488 | rs1122080   | rs112259525 |
| rs11191467  | rs11196169  | rs11202585  | rs112071820 | rs112111458 | rs112164679 | rs112209031 | rs112259853 |
| rs111914893 | rs11196170  | rs11202594  | rs112072415 | rs112111542 | rs112165453 | rs112210483 | rs11226017  |
| rs11191502  | rs11196171  | rs11202654  | rs112073168 | rs11211257  | rs11216614  | rs112210983 | rs11226018  |
| rs11191514  | rs11196172  | rs11202704  | rs11207423  | rs112112734 | rs112166936 | rs11221227  | rs112260610 |
| rs11191548  | rs111962736 | rs11202719  | rs11207426  | rs112114764 | rs11216930  | rs11221332  | rs1122608   |
| rs11191559  | rs11196288  | rs11202736  | rs11207707  | rs11211479  | rs11217020  | rs11221351  | rs112260868 |
| rs11191560  | rs111968456 | rs1120275   | rs11207881  | rs11211480  | rs11217036  | rs11221357  | rs112261624 |
| rs11191580  | rs11196996  | rs112028067 | rs112078975 | rs112115136 | rs11217037  | rs1122138   | rs11226319  |
| rs11191582  | rs111972619 | rs112028523 | rs11207959  | rs11211514  | rs11217040  | rs11221442  | rs11226373  |
| rs11191593  | rs111976018 | rs11202914  | rs11207969  | rs11211532  | rs112170428 | rs11221443  | rs112265145 |
| rs11191595  | rs111976051 | rs112029703 | rs11207992  | rs11211538  | rs11217176  | rs112214646 | rs112266013 |
| rs11191607  | rs111976262 | rs11203202  | rs11207995  | rs112119265 | rs11217191  | rs11221500  | rs112267124 |
| rs11191614  | rs111976570 | rs11203203  | rs11208004  | rs11212104  | rs11217192  | rs112215462 | rs1122688   |
| rs11191683  | rs111977918 | rs11203346  | rs112081420 | rs112123925 | rs11217196  | rs112215522 | rs112270167 |
| rs11191686  | rs11197813  | rs112035922 | rs11208297  | rs112125244 | rs11217215  | rs112215592 | rs112270814 |
| rs111917063 | rs11197820  | rs112036939 | rs11208552  | rs112125399 | rs11217257  | rs1122157   | rs11227136  |
| rs11191775  | rs11197841  | rs112037309 | rs11208556  | rs11212617  | rs11217480  | rs1122171   | rs11227227  |

|             |             |             |             |             |             |             |             |
|-------------|-------------|-------------|-------------|-------------|-------------|-------------|-------------|
| rs11227229  | rs11231138  | rs11237123  | rs11242219  | rs1124639   | rs11250163  | rs11257655  | rs11263779  |
| rs112272342 | rs11231161  | rs112371596 | rs11242247  | rs112464755 | rs112502960 | rs11257657  | rs11263814  |
| rs11227247  | rs112312277 | rs11237450  | rs112422823 | rs11246533  | rs112503449 | rs112578436 | rs11263943  |
| rs11227250  | rs112313229 | rs112374545 | rs11242235  | rs11246554  | rs112505971 | rs112579477 | rs11263946  |
| rs11227260  | rs11231596  | rs11237485  | rs112424890 | rs11246574  | rs112506159 | rs11257952  | rs112639668 |
| rs11227395  | rs112316332 | rs112374913 | rs112426331 | rs11246602  | rs1125082   | rs112579976 | rs112640876 |
| rs11227435  | rs11231640  | rs112375200 | rs11242664  | rs11246610  | rs11251     | rs112580639 | rs11264100  |
| rs11227478  | rs11231693  | rs112375785 | rs11242675  | rs112466685 | rs112512729 | rs11258303  | rs11264223  |
| rs11227582  | rs11231694  | rs11237887  | rs1124268   | rs112468262 | rs112513025 | rs1125841   | rs11264244  |
| rs11227805  | rs11231698  | rs112379405 | rs11242709  | rs11246851  | rs112513907 | rs112584165 | rs11264280  |
| rs1122794   | rs11231711  | rs112380819 | rs11242735  | rs1124694   | rs112515915 | rs11258417  | rs11264296  |
| rs112280096 | rs11231740  | rs112381903 | rs112427713 | rs11247009  | rs112521149 | rs11258419  | rs11264303  |
| rs11228057  | rs11231749  | rs11238297  | rs11242779  | rs11247113  | rs112521333 | rs11258422  | rs11264323  |
| rs11228212  | rs11231757  | rs11238526  | rs11242782  | rs112471280 | rs11252331  | rs11258533  | rs11264327  |
| rs11228219  | rs11231879  | rs112385572 | rs11242982  | rs11247168  | rs11252344  | rs11258541  | rs11264339  |
| rs112282219 | rs11231963  | rs112385750 | rs112430285 | rs11247230  | rs112525473 | rs11258564  | rs11264341  |
| rs11228240  | rs112321070 | rs112386051 | rs11243081  | rs11247252  | rs11252624  | rs112589852 | rs11264360  |
| rs112283362 | rs112324411 | rs11238754  | rs11243145  | rs11247287  | rs112530420 | rs112591782 | rs11264361  |
| rs112283401 | rs112325780 | rs11238756  | rs11243202  | rs11247294  | rs1125313   | rs112591851 | rs112644024 |
| rs11228374  | rs1123285   | rs11238907  | rs1124324   | rs11247554  | rs11253511  | rs11259186  | rs11264422  |
| rs11228377  | rs112329286 | rs112389236 | rs11243290  | rs112477022 | rs11253530  | rs112595563 | rs11264454  |
| rs112285002 | rs112330055 | rs112390170 | rs112433249 | rs11247712  | rs112535818 | rs112595944 | rs1126446   |
| rs11228565  | rs112332300 | rs112391082 | rs112434994 | rs11247718  | rs11253637  | rs112597175 | rs11264472  |
| rs11228620  | rs11233250  | rs112393215 | rs11243638  | rs1124774   | rs112537273 | rs112597538 | rs11264477  |
| rs112286726 | rs112332671 | rs112394247 | rs112436750 | rs112477743 | rs112538772 | rs11259916  | rs11264483  |
| rs112288630 | rs112332688 | rs11239536  | rs1124374   | rs112477875 | rs112540389 | rs11259919  | rs11264489  |
| rs11228868  | rs112332856 | rs11239537  | rs112439069 | rs11247908  | rs112540634 | rs112599205 | rs11264531  |
| rs11228871  | rs112333322 | rs11239541  | rs11244     | rs11248051  | rs11254406  | rs11259926  | rs11264581  |
| rs112289739 | rs11233339  | rs11239544  | rs112440397 | rs11248060  | rs11254464  | rs11259930  | rs1126464   |
| rs11229023  | rs112335739 | rs11239549  | rs112441486 | rs11248061  | rs112545201 | rs11259933  | rs11264728  |
| rs11229030  | rs112336433 | rs11239550  | rs11244669  | rs112481437 | rs112545364 | rs11259936  | rs1126477   |
| rs11229043  | rs11233933  | rs112396911 | rs112446794 | rs112483974 | rs112546679 | rs11259979  | rs1126478   |
| rs11229075  | rs112339942 | rs112399781 | rs11244703  | rs112484600 | rs1125472   | rs112599895 | rs112647987 |
| rs11229077  | rs112340061 | rs112400385 | rs112447441 | rs112485576 | rs112549496 | rs11260013  | rs11265038  |
| rs11229080  | rs112346425 | rs11240089  | rs1124477   | rs112488223 | rs112550936 | rs112601872 | rs11265039  |
| rs11229165  | rs11234702  | rs11240092  | rs11244909  | rs112488402 | rs112551143 | rs112603734 | rs1126510   |
| rs11229169  | rs11234741  | rs11240095  | rs11244935  | rs11248850  | rs11255343  | rs11260629  | rs112651803 |
| rs11229231  | rs112347425 | rs112401631 | rs112452274 | rs11248853  | rs11255401  | rs11260709  | rs11265191  |
| rs11229252  | rs11234768  | rs11240317  | rs11245301  | rs11248862  | rs11255504  | rs112607182 | rs11265230  |
| rs11229264  | rs112348497 | rs112403212 | rs11245331  | rs11248866  | rs11255548  | rs11260765  | rs11265238  |
| rs11229365  | rs112348907 | rs11240325  | rs11245333  | rs11248914  | rs11255753  | rs112607667 | rs11265260  |
| rs112293876 | rs11235     | rs11240351  | rs11245344  | rs112489358 | rs112557609 | rs11261022  | rs11265263  |
| rs11229457  | rs11235059  | rs11240358  | rs11245346  | rs11248941  | rs11255790  | rs112612237 | rs11265395  |
| rs112295236 | rs112352679 | rs11240396  | rs11245347  | rs112490789 | rs11255841  | rs112613078 | rs11265461  |
| rs11229555  | rs112353975 | rs11240408  | rs11245388  | rs11249215  | rs11255908  | rs1126161   | rs112654766 |
| rs11229575  | rs11235604  | rs112404845 | rs11245450  | rs11249243  | rs11255918  | rs112621228 | rs112655948 |
| rs11229691  | rs11235654  | rs11240656  | rs11245453  | rs11249249  | rs11255938  | rs1126225   | rs11265613  |
| rs112297763 | rs11235667  | rs11240695  | rs11245482  | rs112493023 | rs11255968  | rs112624735 | rs112656744 |
| rs112297877 | rs11235688  | rs11240748  | rs112458284 | rs11249433  | rs11255975  | rs1126290   | rs11265835  |
| rs1122979   | rs11235689  | rs112409426 | rs112458826 | rs11249526  | rs11256008  | rs112629408 | rs11265853  |
| rs112299234 | rs112360115 | rs11240962  | rs112458845 | rs112497439 | rs112560164 | rs112631680 | rs112659347 |
| rs1123015   | rs112360218 | rs11241040  | rs11245962  | rs1124980   | rs11256017  | rs112632203 | rs1126605   |
| rs11230201  | rs11236213  | rs112413037 | rs112459818 | rs1124983   | rs11256034  | rs11263432  | rs112661041 |
| rs112302542 | rs11236228  | rs11241565  | rs11245994  | rs112498803 | rs112563712 | rs112634398 | rs112661564 |
| rs11230328  | rs112363956 | rs112416074 | rs11245997  | rs11249939  | rs11256593  | rs11263441  | rs1126627   |
| rs112304816 | rs11236520  | rs11241692  | rs11245998  | rs11249965  | rs11256627  | rs11263458  | rs1126643   |
| rs11230521  | rs11236524  | rs112416932 | rs11246001  | rs11249992  | rs112566467 | rs11263465  | rs112665297 |
| rs11230523  | rs112366692 | rs11241697  | rs11246003  | rs112500154 | rs11256837  | rs1126348   | rs1126670   |
| rs11230563  | rs112367533 | rs112417369 | rs112460278 | rs112500293 | rs112568425 | rs112635299 | rs1126673   |
| rs112306229 | rs112367565 | rs11242     | rs11246043  | rs11250033  | rs112568625 | rs112635931 | rs11266744  |
| rs11230661  | rs112367696 | rs11242103  | rs11246062  | rs11250076  | rs11257029  | rs11263613  | rs112667817 |
| rs11230728  | rs11236791  | rs11242109  | rs11246068  | rs11250079  | rs11257238  | rs11263654  | rs112668446 |
| rs11230757  | rs11236797  | rs112421097 | rs112460909 | rs112500920 | rs11257242  | rs112636902 | rs112669180 |
| rs11230874  | rs1123680   | rs11242111  | rs112462145 | rs11250097  | rs112572441 | rs112637383 | rs112669193 |
| rs11230876  | rs11236813  | rs11242113  | rs112462597 | rs11250117  | rs112572629 | rs112637405 | rs112669216 |
| rs11231084  | rs11236814  | rs112421686 | rs112463197 | rs11250130  | rs11257358  | rs11263761  | rs112672290 |
| rs1123109   | rs112369919 | rs11242218  | rs11246328  | rs11250157  | rs11257600  | rs11263763  | rs1126728   |

|             |             |             |             |             |             |             |             |
|-------------|-------------|-------------|-------------|-------------|-------------|-------------|-------------|
| rs1126742   | rs112766772 | rs112892337 | rs112975146 | rs11307617  | rs113190300 | rs113292043 | rs113386058 |
| rs112674299 | rs11276875  | rs112893074 | rs11297588  | rs113079574 | rs113191842 | rs113292219 | rs113386919 |
| rs1126757   | rs112771035 | rs11289367  | rs112976255 | rs113079736 | rs113193373 | rs113298164 | rs1133926   |
| rs112675878 | rs112772376 | rs112894876 | rs112977309 | rs11308076  | rs113194286 | rs113300903 | rs11339398  |
| rs112679102 | rs112777546 | rs1128956   | rs112978264 | rs113084827 | rs11319483  | rs11330143  | rs113394178 |
| rs112679104 | rs112778462 | rs1128963   | rs112979091 | rs11308613  | rs113195149 | rs11330601  | rs113394869 |
| rs112679361 | rs1127787   | rs1128965   | rs11298204  | rs113086489 | rs113196269 | rs113306449 | rs113397083 |
| rs1126809   | rs112779011 | rs11289753  | rs112982980 | rs1130866   | rs113196631 | rs113306726 | rs113397282 |
| rs112682076 | rs1127796   | rs112898427 | rs112984321 | rs11308796  | rs113197944 | rs1133071   | rs113397893 |
| rs112683685 | rs112779669 | rs112898929 | rs11298677  | rs113092074 | rs113198643 | rs113308129 | rs113399573 |
| rs112684153 | rs112780312 | rs1129      | rs112987086 | rs113092121 | rs11319879  | rs113309773 | rs113400434 |
| rs112688410 | rs1127818   | rs112900993 | rs11299048  | rs11309737  | rs113199002 | rs1133104   | rs113401767 |
| rs1126889   | rs112782083 | rs112901040 | rs112992077 | rs113098876 | rs113199104 | rs113315451 | rs1134027   |
| rs112689088 | rs112785404 | rs112903532 | rs1129942   | rs113100008 | rs11320420  | rs113315602 | rs113403872 |
| rs11268956  | rs112787780 | rs1129038   | rs11299600  | rs1131017   | rs113204513 | rs113315762 | rs113405739 |
| rs112689575 | rs112790992 | rs1129043   | rs11299878  | rs113104107 | rs113205291 | rs113316030 | rs113408367 |
| rs112691327 | rs11279114  | rs112905267 | rs11300005  | rs11310424  | rs113205706 | rs113316507 | rs113408476 |
| rs112691446 | rs112791731 | rs112907088 | rs113000492 | rs113107469 | rs11320626  | rs113316523 | rs11340914  |
| rs1126930   | rs112796209 | rs112908525 | rs113001570 | rs113107529 | rs113211479 | rs113317835 | rs11341092  |
| rs112694389 | rs112797972 | rs11290954  | rs113003693 | rs113108263 | rs113215092 | rs11332131  | rs113414093 |
| rs112694524 | rs112799045 | rs11291116  | rs1130094   | rs113111175 | rs113216780 | rs113321876 | rs113414359 |
| rs112694713 | rs112800995 | rs112912733 | rs113010081 | rs113116706 | rs11321799  | rs113322334 | rs113418195 |
| rs112699334 | rs112805476 | rs112913817 | rs113010607 | rs113118573 | rs113221947 | rs113322698 | rs113419088 |
| rs112702205 | rs112806496 | rs112913898 | rs113011189 | rs113118892 | rs113222435 | rs113322719 | rs113420280 |
| rs112702219 | rs112808618 | rs112914309 | rs113012790 | rs113118940 | rs113222817 | rs113322852 | rs11342032  |
| rs112702477 | rs11281426  | rs1129156   | rs11301391  | rs113119217 | rs11322274  | rs11332300  | rs113421805 |
| rs1127065   | rs112814955 | rs112915601 | rs113016568 | rs113119541 | rs113229608 | rs113323321 | rs113422568 |
| rs112706954 | rs112815117 | rs11291564  | rs113017476 | rs1131199   | rs113230003 | rs11332437  | rs113422987 |
| rs112710029 | rs11281641  | rs112916054 | rs11301805  | rs113120414 | rs11323064  | rs11332772  | rs113423479 |
| rs112711080 | rs112817873 | rs112917684 | rs113019802 | rs113125564 | rs113230849 | rs113330691 | rs11342894  |
| rs112711363 | rs112820281 | rs11291804  | rs113020874 | rs1131265   | rs113232639 | rs11333201  | rs11343     |
| rs112714881 | rs112824187 | rs112921972 | rs113021938 | rs1131275   | rs113234132 | rs1133322   | rs113432289 |
| rs112714914 | rs1128249   | rs112925537 | rs113022368 | rs113128512 | rs11323780  | rs1133330   | rs113434679 |
| rs1127152   | rs112825927 | rs11292716  | rs113023766 | rs113130511 | rs113237937 | rs113334738 | rs11343706  |
| rs112715224 | rs112826173 | rs112927956 | rs11302557  | rs113131010 | rs113238768 | rs113338260 | rs113437066 |
| rs112717154 | rs112828099 | rs11292869  | rs113028056 | rs113132247 | rs113240734 | rs1133400   | rs113439801 |
| rs112717645 | rs1128287   | rs112933999 | rs113028115 | rs113134141 | rs113246091 | rs1133415   | rs113442503 |
| rs1127215   | rs112832450 | rs112935789 | rs113028550 | rs113135335 | rs113247976 | rs113341849 | rs113443718 |
| rs112721625 | rs112833075 | rs112938313 | rs113029345 | rs1131359   | rs113247979 | rs113342804 | rs113445505 |
| rs112723784 | rs1128334   | rs112938613 | rs113029933 | rs113139575 | rs113248907 | rs1133441   | rs11344604  |
| rs112724034 | rs112842230 | rs1129393   | rs11303033  | rs113141792 | rs11325     | rs113344423 | rs113452171 |
| rs112725417 | rs112842440 | rs112941079 | rs11303054  | rs113142693 | rs113252144 | rs113344842 | rs113452299 |
| rs112725451 | rs112843870 | rs112941127 | rs113036477 | rs113146055 | rs113252371 | rs113346517 | rs11345369  |
| rs112728585 | rs112846137 | rs112942650 | rs113036800 | rs113147266 | rs11325303  | rs113347955 | rs113458760 |
| rs112730611 | rs11285054  | rs11294619  | rs113036890 | rs113150176 | rs11325450  | rs113352172 | rs1134590   |
| rs1127311   | rs112852122 | rs112949019 | rs113039233 | rs113154802 | rs113257350 | rs113352275 | rs11346207  |
| rs1127348   | rs112852416 | rs112949165 | rs113041162 | rs11315539  | rs11325774  | rs113354603 | rs1134634   |
| rs1127354   | rs1128535   | rs1129506   | rs113043636 | rs11315757  | rs113260531 | rs11335710  | rs113467400 |
| rs112735431 | rs11285463  | rs11295209  | rs113044050 | rs113160375 | rs113261881 | rs113358329 | rs113469106 |
| rs112737242 | rs11285778  | rs112953954 | rs113046074 | rs113161209 | rs113264677 | rs113358888 | rs113469387 |
| rs112744032 | rs112858709 | rs1129555   | rs113047993 | rs113161639 | rs11326481  | rs113362373 | rs113473601 |
| rs112744418 | rs112859723 | rs11295701  | rs113048054 | rs113164910 | rs113265260 | rs113364618 | rs113473633 |
| rs112745054 | rs112859779 | rs112957890 | rs113048062 | rs1131665   | rs11326570  | rs113366589 | rs113473882 |
| rs112747606 | rs112860941 | rs112958363 | rs113057113 | rs113166754 | rs113266765 | rs11336847  | rs113474297 |
| rs112750178 | rs112862634 | rs112959610 | rs11305733  | rs113170157 | rs113267280 | rs113368673 | rs1134760   |
| rs112753638 | rs112863429 | rs112965849 | rs11305804  | rs113172275 | rs113267846 | rs113369180 | rs113477276 |
| rs1127553   | rs112867328 | rs112966033 | rs113060680 | rs113172748 | rs113269332 | rs11337012  | rs11347749  |
| rs112757932 | rs112869704 | rs112967753 | rs113062739 | rs11317778  | rs113269528 | rs113373353 | rs1134777   |
| rs112758337 | rs112875651 | rs112968809 | rs113063027 | rs113177823 | rs113269935 | rs113374742 | rs113477878 |
| rs11275896  | rs112878080 | rs11296991  | rs113065892 | rs11317857  | rs113270900 | rs1133763   | rs113478424 |
| rs112759492 | rs112878517 | rs1129700   | rs11306716  | rs113180277 | rs113271242 | rs1133773   | rs11347938  |
| rs11275996  | rs112880707 | rs112971307 | rs113070129 | rs113182412 | rs113271760 | rs113377538 | rs11348701  |
| rs112760834 | rs11288072  | rs112971726 | rs113071601 | rs113183368 | rs11327184  | rs113377887 | rs113487086 |
| rs112763553 | rs112880875 | rs112971866 | rs113072763 | rs11318685  | rs113278154 | rs113382419 | rs1134924   |
| rs112764045 | rs112881196 | rs112972174 | rs11307281  | rs1131877   | rs113288103 | rs11338281  | rs11349289  |
| rs1127655   | rs112881773 | rs112972879 | rs1130742   | rs113188507 | rs113288603 | rs113382956 | rs113492892 |
| rs112765699 | rs1128905   | rs112973353 | rs113075218 | rs1131896   | rs113289555 | rs11338569  | rs1134941   |

|             |             |             |             |             |             |             |             |
|-------------|-------------|-------------|-------------|-------------|-------------|-------------|-------------|
| rs11349771  | rs113605227 | rs11371152  | rs113805531 | rs113897301 | rs11400459  | rs114125694 | rs11424823  |
| rs11350     | rs113605295 | rs113711540 | rs11380688  | rs113897692 | rs1140085   | rs114127275 | rs1142528   |
| rs11350038  | rs113608714 | rs113712703 | rs113809617 | rs113898003 | rs11401261  | rs11413261  | rs114253244 |
| rs113500463 | rs113608931 | rs1137134   | rs113809930 | rs113898337 | rs114012716 | rs114132812 | rs114254831 |
| rs113507773 | rs113613943 | rs113714691 | rs113809996 | rs113899791 | rs114017545 | rs114134839 | rs11425772  |
| rs113509869 | rs113613982 | rs113715277 | rs113810779 | rs113900126 | rs114020893 | rs114135552 | rs114261345 |
| rs113510833 | rs113614274 | rs113715580 | rs11381197  | rs113900142 | rs11402145  | rs114136102 | rs114263339 |
| rs113511609 | rs113614987 | rs11371645  | rs113817010 | rs11390176  | rs114022259 | rs11413744  | rs114266592 |
| rs113518470 | rs113615161 | rs113720505 | rs113817060 | rs11390181  | rs1140227   | rs114138760 | rs11426768  |
| rs11352016  | rs1136165   | rs113720761 | rs11381740  | rs113904294 | rs114026228 | rs11413983  | rs114269697 |
| rs113520408 | rs113617776 | rs113721499 | rs113817743 | rs11390840  | rs11402836  | rs114139997 | rs114271760 |
| rs113521642 | rs11361835  | rs11372185  | rs113819537 | rs11391014  | rs114029601 | rs114142645 | rs114272138 |
| rs11352199  | rs11361923  | rs113722913 | rs113821260 | rs11391312  | rs114030538 | rs114142949 | rs114274203 |
| rs113525195 | rs1136201   | rs1137256   | rs11382300  | rs11391380  | rs11403123  | rs114147769 | rs11427441  |
| rs11352831  | rs113625761 | rs113727800 | rs11382482  | rs11391636  | rs114032302 | rs11414909  | rs114274879 |
| rs1135314   | rs113626350 | rs113728099 | rs113824873 | rs113918189 | rs114036675 | rs114151323 | rs114276265 |
| rs11353326  | rs113626448 | rs11373039  | rs113825134 | rs113919848 | rs114038709 | rs1141528   | rs114277634 |
| rs113534515 | rs113628353 | rs113731629 | rs11382616  | rs113923480 | rs1140404   | rs114153232 | rs11427899  |
| rs113535871 | rs1136287   | rs113731836 | rs113826451 | rs113924863 | rs114041423 | rs114156042 | rs11428167  |
| rs113537684 | rs113630867 | rs11373615  | rs113829044 | rs11392696  | rs11404217  | rs114162361 | rs11428326  |
| rs113537788 | rs113631324 | rs113736796 | rs113831257 | rs113928546 | rs114042950 | rs114165349 | rs114285050 |
| rs113542380 | rs113635136 | rs1137385   | rs113832155 | rs113928896 | rs114045002 | rs114165399 | rs114285994 |
| rs113543437 | rs113636864 | rs113740363 | rs11383346  | rs11392999  | rs114046333 | rs114165892 | rs11428711  |
| rs113543611 | rs113637042 | rs113740515 | rs113833704 | rs113931125 | rs114050142 | rs114167666 | rs11428934  |
| rs113543909 | rs113639185 | rs113742427 | rs1138345   | rs113932726 | rs114050631 | rs114169058 | rs1142899   |
| rs113544461 | rs11364492  | rs113743631 | rs113835330 | rs113938611 | rs114050967 | rs1141715   | rs114291394 |
| rs113544820 | rs113646461 | rs113744258 | rs11383572  | rs113938679 | rs114052230 | rs114175587 | rs114291795 |
| rs113547729 | rs113647342 | rs11374545  | rs11383739  | rs113938713 | rs114053538 | rs114176245 | rs11429183  |
| rs113548871 | rs113650570 | rs113745635 | rs113837888 | rs113939876 | rs11405520  | rs114180431 | rs11429191  |
| rs113549824 | rs113653754 | rs11374964  | rs113839546 | rs113940700 | rs114055620 | rs114181198 | rs11429307  |
| rs113551349 | rs113654    | rs11374977  | rs113841147 | rs11394128  | rs11405616  | rs114182264 | rs11429616  |
| rs113552169 | rs113658408 | rs113751475 | rs1138429   | rs11394256  | rs114056237 | rs114183675 | rs1143015   |
| rs113553570 | rs113658831 | rs11375254  | rs113843864 | rs113946216 | rs114060326 | rs114187207 | rs114303452 |
| rs11355526  | rs113659074 | rs113755171 | rs113847670 | rs113946377 | rs114064810 | rs11418777  | rs11430387  |
| rs11355683  | rs113660049 | rs113755660 | rs1138486   | rs113949240 | rs11406665  | rs114190032 | rs114305144 |
| rs113557605 | rs11366076  | rs113756602 | rs11384871  | rs113953597 | rs11406672  | rs114190730 | rs11430669  |
| rs113562005 | rs113661590 | rs113759232 | rs113851275 | rs113954756 | rs114067101 | rs114192810 | rs114306779 |
| rs11356207  | rs113661672 | rs113760175 | rs113851554 | rs113956264 | rs11406772  | rs11419346  | rs114306866 |
| rs11356211  | rs113663609 | rs113761591 | rs11385342  | rs113957352 | rs114071887 | rs114193679 | rs114309483 |
| rs113563325 | rs113664481 | rs113766063 | rs1138545   | rs113962925 | rs11407350  | rs114193689 | rs114309882 |
| rs113564729 | rs1136689   | rs11376788  | rs113855064 | rs113964240 | rs11407391  | rs11419632  | rs11431     |
| rs11356507  | rs113670117 | rs11377029  | rs113855341 | rs1139652   | rs11407396  | rs114197570 | rs114313448 |
| rs113565775 | rs113671070 | rs11377084  | rs113858761 | rs1139653   | rs11407544  | rs114198802 | rs1143146   |
| rs113568287 | rs113676020 | rs113772882 | rs11385942  | rs113966252 | rs114081163 | rs1142      | rs11431553  |
| rs11356859  | rs113676749 | rs113773470 | rs113862204 | rs11396834  | rs114086406 | rs114200269 | rs114322830 |
| rs113568682 | rs113677020 | rs113773649 | rs113862443 | rs113968785 | rs114088263 | rs114202043 | rs11433359  |
| rs113569514 | rs113677319 | rs113774595 | rs113866309 | rs11396934  | rs1140892   | rs11420276  | rs11433420  |
| rs113569731 | rs11367864  | rs113779084 | rs113866544 | rs113973451 | rs114090659 | rs114204022 | rs114341625 |
| rs113570449 | rs113678689 | rs113780580 | rs113867238 | rs113974007 | rs11409090  | rs114205691 | rs11434755  |
| rs113577745 | rs113679437 | rs113781727 | rs11386753  | rs113975478 | rs114092250 | rs114208039 | rs11434868  |
| rs113577760 | rs113681054 | rs1137843   | rs113868593 | rs113976843 | rs114092478 | rs114209171 | rs11434877  |
| rs1135810   | rs113681861 | rs113784679 | rs11386980  | rs113977268 | rs114092838 | rs11421     | rs11435035  |
| rs113585475 | rs113687477 | rs113786869 | rs11387114  | rs113985657 | rs11409477  | rs114211283 | rs114353727 |
| rs113588399 | rs113691307 | rs113787062 | rs1138714   | rs113986197 | rs11409581  | rs114212579 | rs114355928 |
| rs113590482 | rs113693454 | rs113788088 | rs113871531 | rs113986290 | rs11409738  | rs11422116  | rs114357009 |
| rs113590793 | rs11369670  | rs11379197  | rs113872034 | rs11398692  | rs11409890  | rs114224075 | rs11436001  |
| rs11359133  | rs113699397 | rs113792729 | rs11387498  | rs11398788  | rs114102658 | rs114224598 | rs114360492 |
| rs113592246 | rs1136998   | rs113795690 | rs113877493 | rs11398842  | rs11410487  | rs114229351 | rs1143623   |
| rs113594982 | rs113700287 | rs11379581  | rs113880644 | rs1139897   | rs114106861 | rs11422952  | rs1143627   |
| rs113595563 | rs113701136 | rs11379633  | rs11388112  | rs11399056  | rs114112910 | rs1142323   | rs1143633   |
| rs11359909  | rs113701417 | rs113796581 | rs113881833 | rs11399095  | rs11411390  | rs114233776 | rs1143634   |
| rs113599586 | rs113704612 | rs113797410 | rs113884102 | rs113993396 | rs114115115 | rs1142345   | rs1143676   |
| rs1135999   | rs113706999 | rs113797868 | rs1138888   | rs113998067 | rs114115252 | rs114236244 | rs1143679   |
| rs1136001   | rs113707721 | rs113798704 | rs113893384 | rs11399965  | rs11411545  | rs11423823  | rs114369210 |
| rs113601626 | rs113708270 | rs113799399 | rs113895617 | rs114001906 | rs114123510 | rs114239771 | rs114372900 |
| rs113602013 | rs113710278 | rs113803678 | rs113896694 | rs114002140 | rs114124202 | rs114242735 | rs114374770 |
| rs113604586 | rs113711385 | rs11380525  | rs11389722  | rs114002231 | rs114124763 | rs114247628 | rs1143768   |

|             |             |             |             |             |             |             |             |
|-------------|-------------|-------------|-------------|-------------|-------------|-------------|-------------|
| rs1143770   | rs11451130  | rs11463315  | rs1147478   | rs114870878 | rs1150339   | rs115145466 | rs115256851 |
| rs114377514 | rs1145123   | rs114634117 | rs1147479   | rs114872993 | rs115035678 | rs115146037 | rs115257434 |
| rs114378220 | rs114515123 | rs114635257 | rs114748586 | rs1148732   | rs115039395 | rs11514731  | rs1152578   |
| rs11437847  | rs11451718  | rs114635803 | rs114751860 | rs114875775 | rs1150428   | rs11514744  | rs11525873  |
| rs11438378  | rs114518130 | rs11463615  | rs11475465  | rs114876986 | rs115045402 | rs11514810  | rs1152591   |
| rs114383947 | rs1145198   | rs1146382   | rs114755225 | rs114882497 | rs115048780 | rs1151490   | rs1152595   |
| rs114385935 | rs11452219  | rs114645617 | rs114756490 | rs114887538 | rs11505019  | rs1151515   | rs115260227 |
| rs1143869   | rs1145247   | rs11464691  | rs114757170 | rs114893614 | rs11505217  | rs11515071  | rs11526064  |
| rs114388793 | rs114526602 | rs11464707  | rs114758110 | rs114894790 | rs115052633 | rs115151282 | rs1152620   |
| rs11438927  | rs11452686  | rs11465228  | rs114760566 | rs114894862 | rs115053934 | rs11515172  | rs115262049 |
| rs11439438  | rs114527818 | rs11465254  | rs1147611   | rs114900182 | rs115056352 | rs115152181 | rs11526468  |
| rs11439479  | rs114529226 | rs11465295  | rs114766804 | rs1149003   | rs115056380 | rs1151523   | rs1152698   |
| rs114397473 | rs114530232 | rs11465296  | rs114769095 | rs114904067 | rs115056666 | rs11515363  | rs115273594 |
| rs114398276 | rs114534    | rs11465506  | rs1147707   | rs114904464 | rs11505688  | rs115154932 | rs115276619 |
| rs1144      | rs114537871 | rs114655291 | rs114771361 | rs1149048   | rs115061173 | rs11515536  | rs115278162 |
| rs114407963 | rs11454405  | rs11465606  | rs114771815 | rs114922507 | rs115062    | rs115151582 | rs1152794   |
| rs11441374  | rs114544105 | rs11465699  | rs11477197  | rs114922930 | rs115062572 | rs115159272 | rs115282290 |
| rs114419215 | rs11454451  | rs11465729  | rs11477536  | rs114934911 | rs1150628   | rs115161931 | rs115282653 |
| rs11442031  | rs114547897 | rs11465804  | rs11477757  | rs114934997 | rs115063924 | rs115162333 | rs115283957 |
| rs11442179  | rs114555443 | rs114658852 | rs114778000 | rs114937304 | rs115064    | rs115165620 | rs1152847   |
| rs11442196  | rs1145580   | rs114659987 | rs114778301 | rs1149470   | rs11506660  | rs115165987 | rs115286434 |
| rs114422334 | rs114558062 | rs11466111  | rs11478     | rs114947103 | rs1150668   | rs115166140 | rs115287176 |
| rs11442819  | rs11455840  | rs114661926 | rs114780236 | rs114948639 | rs115067260 | rs115172170 | rs115288876 |
| rs11442947  | rs114558965 | rs114665747 | rs1147851   | rs114949263 | rs115067791 | rs115176171 | rs115291397 |
| rs114431834 | rs114559131 | rs11466587  | rs1147852   | rs114950038 | rs1150687   | rs115177000 | rs115294879 |
| rs114432657 | rs11455989  | rs11466648  | rs114786346 | rs114952970 | rs1150688   | rs1151786   | rs1152958   |
| rs11443474  | rs11456119  | rs114667465 | rs114786890 | rs1149557   | rs1150691   | rs115178836 | rs115299044 |
| rs114437475 | rs114564188 | rs11466764  | rs114792668 | rs1149558   | rs1150696   | rs115179432 | rs115299243 |
| rs1144379   | rs1145656   | rs114670061 | rs114796738 | rs11495590  | rs115070292 | rs115182912 | rs115306967 |
| rs114441450 | rs11456569  | rs114670539 | rs114798579 | rs114958262 | rs115073088 | rs115183538 | rs115307848 |
| rs114442993 | rs11456863  | rs114672190 | rs114800139 | rs11495981  | rs115073686 | rs115183712 | rs115308456 |
| rs114443260 | rs114571830 | rs1146751   | rs114801796 | rs1149605   | rs115074082 | rs1151849   | rs115310850 |
| rs11444403  | rs1145724   | rs11467641  | rs114802991 | rs1149606   | rs1150752   | rs115187146 | rs115319174 |
| rs114444221 | rs114574084 | rs114676416 | rs1148039   | rs11496066  | rs1150753   | rs115192074 | rs11532157  |
| rs114444506 | rs114577328 | rs114685606 | rs114803904 | rs11496125  | rs1150754   | rs115192536 | rs115321690 |
| rs114447556 | rs11458     | rs114687675 | rs11480453  | rs1149616   | rs1150755   | rs115196122 | rs11532186  |
| rs114450524 | rs114580352 | rs11468901  | rs11480832  | rs1149620   | rs1150757   | rs1152002   | rs11532322  |
| rs114451718 | rs114581300 | rs1146932   | rs114810457 | rs114962105 | rs1150781   | rs11520042  | rs115325719 |
| rs114455101 | rs114582462 | rs1146933   | rs114810763 | rs11496294  | rs11508026  | rs1152008   | rs115325909 |
| rs1144566   | rs11458422  | rs114693875 | rs114811870 | rs114963521 | rs115091345 | rs11520126  | rs1153280   |
| rs114458961 | rs114584519 | rs114694170 | rs114811931 | rs1149643   | rs11509137  | rs115202890 | rs115328987 |
| rs1144593   | rs11459029  | rs114695117 | rs114812317 | rs114964326 | rs115092255 | rs115205687 | rs11532907  |
| rs114460660 | rs114590746 | rs114697636 | rs114812713 | rs114964506 | rs115092994 | rs115208233 | rs115329265 |
| rs11446839  | rs114593013 | rs11469915  | rs11481307  | rs114965247 | rs115093996 | rs115208852 | rs1153293   |
| rs114468556 | rs114593137 | rs114700498 | rs114816312 | rs11496531  | rs11509880  | rs115209326 | rs115330848 |
| rs1144700   | rs1145949   | rs114707880 | rs114816829 | rs114970491 | rs115100928 | rs11521     | rs115332380 |
| rs1144709   | rs114595701 | rs114708114 | rs114821641 | rs11497367  | rs115102486 | rs11521331  | rs115333019 |
| rs1144710   | rs11459608  | rs114709597 | rs114821903 | rs114974608 | rs115109046 | rs115213730 | rs115333627 |
| rs11447348  | rs114598080 | rs1147118   | rs1148259   | rs114976176 | rs11510917  | rs115216147 | rs115340020 |
| rs114473983 | rs114598684 | rs11471274  | rs114827547 | rs11497798  | rs115110965 | rs115218263 | rs11534004  |
| rs114489117 | rs114600294 | rs114714860 | rs114828403 | rs1149821   | rs115112280 | rs115218289 | rs115340137 |
| rs114489401 | rs114601353 | rs1147169   | rs114830752 | rs114985235 | rs1151139   | rs11521830  | rs11534296  |
| rs114490818 | rs11460298  | rs11471725  | rs1148375   | rs114989019 | rs115118356 | rs115219551 | rs115344852 |
| rs114492924 | rs114604222 | rs11471957  | rs114838832 | rs11499034  | rs11511923  | rs11522732  | rs115344853 |
| rs114495530 | rs114605388 | rs1147198   | rs1148394   | rs114997373 | rs115123027 | rs115231027 | rs11534589  |
| rs114496946 | rs114605943 | rs1147199   | rs114846969 | rs11499824  | rs115123779 | rs115231074 | rs11534749  |
| rs11450043  | rs11460674  | rs114720649 | rs114847962 | rs115000530 | rs11512828  | rs115231893 | rs11535405  |
| rs11450220  | rs1146079   | rs114728753 | rs114848860 | rs11500477  | rs115131074 | rs115234772 | rs11535934  |
| rs114503346 | rs114609788 | rs114732119 | rs11485618  | rs115007843 | rs115135226 | rs115241741 | rs115359679 |
| rs114506919 | rs114613161 | rs11473328  | rs114863007 | rs115008099 | rs115136442 | rs115242751 | rs115360517 |
| rs1145074   | rs114618162 | rs114733917 | rs11486499  | rs115018790 | rs115136484 | rs115242848 | rs1153606   |
| rs1145077   | rs114621605 | rs11473501  | rs114866397 | rs115019703 | rs11513649  | rs115243197 | rs11536869  |
| rs1145078   | rs11462324  | rs11473792  | rs114866784 | rs11502350  | rs115136538 | rs115245297 | rs115368816 |
| rs114508013 | rs11462350  | rs114741563 | rs114867672 | rs115023893 | rs115136616 | rs115253693 | rs115369753 |
| rs114508985 | rs11462415  | rs114743735 | rs11486794  | rs115024193 | rs11513729  | rs115254023 | rs115374247 |
| rs1145093   | rs11462858  | rs114745413 | rs114869558 | rs1150313   | rs115137622 | rs11525445  | rs11537452  |
| rs11451044  | rs11463187  | rs114746017 | rs114870811 | rs115031589 | rs115142950 | rs11525582  | rs11537645  |

|             |             |             |             |             |             |             |             |
|-------------|-------------|-------------|-------------|-------------|-------------|-------------|-------------|
| rs115378818 | rs11546525  | rs11555563  | rs11564258  | rs11572842  | rs11579440  | rs115849089 | rs11590635  |
| rs115380769 | rs11546711  | rs11555696  | rs11564398  | rs115729734 | rs115795127 | rs11585169  | rs115906455 |
| rs115381724 | rs1154672   | rs11555762  | rs11564403  | rs115730158 | rs11579557  | rs11585357  | rs115910097 |
| rs115381894 | rs115468540 | rs1155577   | rs115645848 | rs11573156  | rs11579633  | rs115854006 | rs115910830 |
| rs1153855   | rs11546878  | rs115557929 | rs11564708  | rs1157317   | rs11579758  | rs1158569   | rs11591129  |
| rs1153858   | rs115468973 | rs115558405 | rs11564722  | rs11573260  | rs11579916  | rs1158570   | rs11591147  |
| rs115390301 | rs115472351 | rs11555886  | rs115648484 | rs115732722 | rs1157994   | rs11585774  | rs115911679 |
| rs115390513 | rs11547464  | rs115560420 | rs115651556 | rs115735582 | rs11580078  | rs11585926  | rs11591179  |
| rs11539148  | rs1154752   | rs115560901 | rs115653138 | rs115738100 | rs11580135  | rs115859306 | rs1159118   |
| rs11539157  | rs11547648  | rs1155612   | rs115654617 | rs11573824  | rs11580387  | rs11586087  | rs115912456 |
| rs11539209  | rs115476742 | rs11556218  | rs115654697 | rs115739682 | rs11580561  | rs11586197  | rs11591402  |
| rs115393837 | rs11547731  | rs11556391  | rs1156567   | rs115740542 | rs11580608  | rs115863756 | rs115915654 |
| rs115396057 | rs115478735 | rs11556505  | rs115658936 | rs11574452  | rs11580646  | rs11586493  | rs11591710  |
| rs11539637  | rs11548200  | rs115566560 | rs115660490 | rs115744676 | rs115806594 | rs115865075 | rs11591741  |
| rs11539752  | rs115483925 | rs115567723 | rs115660648 | rs115744844 | rs115807391 | rs1158660   | rs11591860  |
| rs11539938  | rs115485095 | rs11556868  | rs115661163 | rs11574552  | rs11580768  | rs115866594 | rs115918645 |
| rs115400054 | rs11548618  | rs11556924  | rs115661362 | rs11574637  | rs11580946  | rs115866895 | rs11591870  |
| rs11540084  | rs11548656  | rs115569272 | rs115664621 | rs11574667  | rs115809613 | rs115868021 | rs1159201   |
| rs115403343 | rs115486640 | rs115569378 | rs115666025 | rs11574765  | rs115809796 | rs11586871  | rs115920413 |
| rs11540358  | rs115487448 | rs11557080  | rs115668827 | rs11574914  | rs11581010  | rs115870917 | rs11592107  |
| rs115406947 | rs115487693 | rs11557154  | rs1156725   | rs11574938  | rs11581062  | rs11587213  | rs11592166  |
| rs11540832  | rs11549015  | rs115572130 | rs11567694  | rs11575194  | rs11581122  | rs115872194 | rs11592299  |
| rs11541192  | rs115490375 | rs11557236  | rs11567699  | rs11575222  | rs11581248  | rs11587347  | rs11592436  |
| rs1154155   | rs115490395 | rs11557288  | rs11567701  | rs11575234  | rs11581328  | rs11587399  | rs11592462  |
| rs115416593 | rs11549105  | rs115575488 | rs11567963  | rs11575578  | rs1158136   | rs11587409  | rs1159268   |
| rs11541908  | rs11549407  | rs115575857 | rs115681968 | rs11575580  | rs115813648 | rs11587434  | rs11592754  |
| rs1154214   | rs11549428  | rs11557713  | rs115682897 | rs11575837  | rs11581418  | rs11587444  | rs115928623 |
| rs115421670 | rs115497191 | rs1155786   | rs11568318  | rs11575839  | rs115814778 | rs11587515  | rs11592899  |
| rs115421711 | rs1154988   | rs11557895  | rs115683961 | rs11575845  | rs11581607  | rs11587555  | rs115929572 |
| rs11542436  | rs11549914  | rs115584509 | rs115687605 | rs11576073  | rs1158167   | rs115877304 | rs11593277  |
| rs11542462  | rs115503647 | rs11558471  | rs11568818  | rs11576308  | rs11581730  | rs11587735  | rs11593377  |
| rs11542663  | rs115504329 | rs115587484 | rs11568819  | rs11576356  | rs11581846  | rs11587758  | rs11593678  |
| rs115427247 | rs115505614 | rs11558819  | rs11568904  | rs11576360  | rs115819854 | rs115878542 | rs115937317 |
| rs115427296 | rs115506546 | rs115589277 | rs11568905  | rs11576415  | rs115820364 | rs11587876  | rs11593840  |
| rs115429782 | rs115507122 | rs11558979  | rs11568972  | rs115765562 | rs115820925 | rs11587895  | rs11593898  |
| rs115429849 | rs11551002  | rs11559024  | rs11569103  | rs11576565  | rs11582423  | rs115879499 | rs11594179  |
| rs11543194  | rs115511641 | rs115592939 | rs11569142  | rs1157684   | rs1158246   | rs1158805   | rs1159421   |
| rs11543198  | rs11551274  | rs115593871 | rs11569190  | rs11576909  | rs11582663  | rs115881343 | rs115942480 |
| rs11543269  | rs115513158 | rs1155939   | rs115692156 | rs11577023  | rs11582805  | rs115881877 | rs11594566  |
| rs11543349  | rs115514216 | rs115599330 | rs11569334  | rs115770674 | rs11582820  | rs11588271  | rs115946107 |
| rs115435316 | rs1155156   | rs1155998   | rs115693355 | rs11577094  | rs115829748 | rs11588341  | rs11594623  |
| rs115437294 | rs115515961 | rs11559982  | rs11569415  | rs11577318  | rs115830429 | rs115884658 | rs115946508 |
| rs115438240 | rs11551890  | rs115600411 | rs11569479  | rs11577369  | rs1158317   | rs11588551  | rs11594897  |
| rs11543947  | rs115523707 | rs115600761 | rs115695709 | rs115774037 | rs11583200  | rs11588625  | rs11594905  |
| rs1154401   | rs115523882 | rs115605487 | rs115697725 | rs1157745   | rs11583393  | rs1158867   | rs11595127  |
| rs1154414   | rs11552449  | rs115607791 | rs1156979   | rs11577545  | rs11583398  | rs11588675  | rs11595166  |
| rs115441532 | rs115526448 | rs11560874  | rs115699278 | rs11577583  | rs11583546  | rs11588755  | rs11595500  |
| rs115443066 | rs11552708  | rs11561066  | rs115700790 | rs11577684  | rs11583641  | rs115888294 | rs115955602 |
| rs1154433   | rs115529844 | rs115613607 | rs1157008   | rs115777110 | rs115836882 | rs11588850  | rs11595697  |
| rs115448006 | rs1155347   | rs115614261 | rs11570112  | rs115778101 | rs115837469 | rs11588857  | rs11595895  |
| rs11545016  | rs11553699  | rs115616389 | rs11570115  | rs11578046  | rs11583750  | rs11588913  | rs115960910 |
| rs11545157  | rs11553746  | rs115618145 | rs11570190  | rs115781177 | rs11583755  | rs11588970  | rs115960997 |
| rs11545169  | rs11553764  | rs11561993  | rs115704890 | rs11578119  | rs11583886  | rs11589125  | rs1159619   |
| rs11545185  | rs115539978 | rs115619982 | rs115707133 | rs115782353 | rs11584009  | rs11589186  | rs11596211  |
| rs115453475 | rs11554014  | rs11562010  | rs1157072   | rs11578508  | rs115840193 | rs115893283 | rs11596214  |
| rs115455482 | rs115540638 | rs1156211   | rs115707823 | rs11578572  | rs11584075  | rs11589479  | rs11596241  |
| rs115456027 | rs11554159  | rs1156242   | rs1157083   | rs11578655  | rs115841388 | rs11589487  | rs115963308 |
| rs11545700  | rs1155422   | rs115625073 | rs11570891  | rs11578699  | rs11584380  | rs1158960   | rs11596387  |
| rs115457135 | rs11554257  | rs11563     | rs11571297  | rs11578770  | rs11584383  | rs115897075 | rs1159649   |
| rs115457386 | rs11554266  | rs115630272 | rs11571302  | rs11578829  | rs11584506  | rs11589759  | rs11597071  |
| rs11545787  | rs115548824 | rs115631825 | rs11571354  | rs11579145  | rs115845232 | rs115900144 | rs115970881 |
| rs115458560 | rs115550680 | rs11563251  | rs11571376  | rs11579220  | rs115846244 | rs11590190  | rs11597119  |
| rs1154595   | rs11555096  | rs1156327   | rs11571404  | rs11579246  | rs1158464   | rs115902351 | rs11597390  |
| rs115460205 | rs11555134  | rs11563582  | rs11571409  | rs115792481 | rs11584700  | rs115902543 | rs11597421  |
| rs115462819 | rs115552537 | rs11563648  | rs11571818  | rs11579326  | rs11584821  | rs11590380  | rs115978073 |
| rs115463265 | rs11555274  | rs11564024  | rs11571833  | rs115793642 | rs115848216 | rs115903965 | rs1159787   |
| rs115464798 | rs11555542  | rs115641444 | rs11572082  | rs11579382  | rs115848955 | rs115904095 | rs11597947  |

|             |             |             |             |             |             |             |             |
|-------------|-------------|-------------|-------------|-------------|-------------|-------------|-------------|
| rs115979533 | rs11603763  | rs11608149  | rs11615689  | rs11621908  | rs11627485  | rs11633958  | rs116383353 |
| rs1159798   | rs11603808  | rs11608355  | rs11615710  | rs116219610 | rs11627531  | rs11634028  | rs11638352  |
| rs11598018  | rs116039674 | rs11608458  | rs11615712  | rs116219813 | rs11627546  | rs116340302 | rs11638372  |
| rs11598047  | rs11604034  | rs11608693  | rs11615745  | rs11622435  | rs116275905 | rs11634187  | rs116383923 |
| rs1159806   | rs116041037 | rs11608702  | rs11615755  | rs116224959 | rs11627594  | rs116341888 | rs11638445  |
| rs11598350  | rs11604127  | rs116087048 | rs11615763  | rs11622558  | rs116276359 | rs11634257  | rs11638477  |
| rs11598602  | rs11604175  | rs11608710  | rs11615765  | rs11622562  | rs11627756  | rs11634351  | rs11638511  |
| rs115986297 | rs116041786 | rs11608727  | rs116158112 | rs116226959 | rs11627901  | rs11634397  | rs11638521  |
| rs11598726  | rs116042116 | rs116088953 | rs11615918  | rs116228246 | rs116279971 | rs11634491  | rs116385615 |
| rs11598765  | rs11604333  | rs116089225 | rs11615992  | rs11622829  | rs11628208  | rs11634851  | rs11638671  |
| rs11598767  | rs11604424  | rs11609     | rs11616188  | rs11622942  | rs11628273  | rs116348849 | rs116386746 |
| rs11598846  | rs11604451  | rs116092985 | rs11616380  | rs11622947  | rs116282955 | rs116349818 | rs11638830  |
| rs11598867  | rs11604462  | rs116095464 | rs116164290 | rs116230084 | rs11628304  | rs11635059  | rs11638831  |
| rs11599095  | rs11604680  | rs11609649  | rs11616444  | rs11623285  | rs11628318  | rs11635084  | rs11638908  |
| rs11599236  | rs116046827 | rs11609729  | rs11616491  | rs116232857 | rs11628528  | rs11635174  | rs11638944  |
| rs11599481  | rs11604717  | rs1160983   | rs11616662  | rs11623384  | rs11628569  | rs11635288  | rs11638950  |
| rs11599591  | rs116047537 | rs1160984   | rs11616720  | rs116234738 | rs116287860 | rs11635385  | rs11639051  |
| rs1159974   | rs116047540 | rs1160985   | rs116169065 | rs11623535  | rs11628933  | rs116353863 | rs11639183  |
| rs11599750  | rs11604855  | rs11609905  | rs116169465 | rs116237496 | rs11629120  | rs11635495  | rs116392568 |
| rs11599775  | rs11605020  | rs11610045  | rs11617058  | rs116238056 | rs11629144  | rs11635675  | rs11639303_ |
| rs11599958  | rs116052829 | rs116100695 | rs116171174 | rs11623869  | rs11629297  | rs11635753  | G_A         |
| rs116000059 | rs11605348  | rs11610143  | rs11617448  | rs11623906  | rs116293915 | rs11635896  | rs11639372  |
| rs11600132  | rs11605427  | rs11610543  | rs116174979 | rs116239840 | rs11629412  | rs11635966  | rs11639470  |
| rs11600148  | rs1160543   | rs11610659  | rs116175783 | rs11624056  | rs11629457  | rs11636013  | rs11639564  |
| rs11600151  | rs1160544   | rs116108880 | rs11617955  | rs11624106  | rs116295105 | rs11636034  | rs116396069 |
| rs11600312  | rs11605518  | rs11610973  | rs116180191 | rs11624221  | rs116295688 | rs11636046  | rs11639803  |
| rs11600450  | rs1160554   | rs11611087  | rs11618212  | rs11624293  | rs11629621  | rs11636073  | rs11639856  |
| rs11600674  | rs11605647  | rs11611246  | rs116182620 | rs11624310  | rs11629783  | rs11636084  | rs116399700 |
| rs116006942 | rs11605681  | rs11611334  | rs116183010 | rs11624333  | rs11629813  | rs11636087  | rs116399833 |
| rs116008080 | rs116057745 | rs116113631 | rs11618401  | rs116243488 | rs116298301 | rs11636147  | rs116399861 |
| rs116008367 | rs11605776  | rs11611397  | rs11618432  | rs11624408  | rs116298992 | rs11636245  | rs11639988  |
| rs1160093   | rs11605837  | rs11611435  | rs11618507  | rs11624464  | rs11630054  | rs11636251  | rs11640031  |
| rs116009877 | rs11605924  | rs116116372 | rs11618508  | rs11624512  | rs11630187  | rs1163627   | rs11640143  |
| rs11601239  | rs11605956  | rs11611647  | rs11618532  | rs11624548  | rs11630254  | rs116362708 | rs11640322  |
| rs11601331  | rs11606     | rs11611651  | rs116187470 | rs116246792 | rs11630762  | rs1163628   | rs11640346  |
| rs11601370  | rs11606126  | rs11611855  | rs116189786 | rs11624704  | rs11630839  | rs11636403  | rs11640494  |
| rs11601507  | rs11606244  | rs116118746 | rs11618989  | rs11624776  | rs1163085   | rs11636407  | rs11640533  |
| rs116015634 | rs11606250  | rs11612024  | rs11619066  | rs11625026  | rs116310021 | rs11636536  | rs11640569  |
| rs11601576  | rs11606393  | rs11612228  | rs11619505  | rs11625064  | rs11631075  | rs11636611  | rs116408368 |
| rs11601694  | rs11606396  | rs11612508  | rs116195355 | rs116251328 | rs11631178  | rs11636613  | rs11640954  |
| rs11601792  | rs11606499  | rs11612727  | rs116196735 | rs116251444 | rs11631253  | rs116366156 | rs11641011  |
| rs11602008  | rs116065238 | rs11613183  | rs11619721  | rs116254153 | rs11631380  | rs11636802  | rs11641016  |
| rs11602052  | rs11606601  | rs11613189  | rs11619722  | rs11625452  | rs116315504 | rs116369005 | rs11641050  |
| rs11602323  | rs11606643  | rs116131939 | rs11619840  | rs11625487  | rs116316977 | rs11636917  | rs11641118  |
| rs11602339  | rs11606692  | rs11613325  | rs116199914 | rs116254882 | rs1163174   | rs11636952  | rs11641153  |
| rs1160248   | rs116067082 | rs11613331  | rs116200463 | rs11625512  | rs11631778  | rs11636961  | rs11641184  |
| rs11602582  | rs11606709  | rs11613352  | rs116202356 | rs11625524  | rs11631974  | rs11637027  | rs11641239  |
| rs11602616  | rs11606786  | rs11613431  | rs11620312  | rs11625650  | rs11632038  | rs11637353  | rs11641308  |
| rs116026278 | rs11606791  | rs116135446 | rs11620355  | rs11625753  | rs11632106  | rs11637565  | rs11641374  |
| rs11602873  | rs11606813  | rs116135844 | rs11620380  | rs11625865  | rs11632112  | rs11637595  | rs11641445  |
| rs11602954  | rs1160685   | rs11613704  | rs11620465  | rs11626     | rs116323041 | rs11637611  | rs11641548  |
| rs11603020  | rs11606902  | rs116137698 | rs11620731  | rs116260619 | rs116323614 | rs116376114 | rs116417701 |
| rs11603023  | rs11607019  | rs116139393 | rs11620921  | rs11626222  | rs1163238   | rs11637630  | rs11641811  |
| rs1160312   | rs11607038  | rs116139966 | rs116210206 | rs11626401  | rs11632414  | rs116376456 | rs116418332 |
| rs11603123  | rs11607056  | rs11614062  | rs11621061  | rs11626434  | rs11632436  | rs11637656  | rs11641834  |
| rs11603150  | rs11607100  | rs11614178  | rs11621121  | rs11626438  | rs1163251   | rs11637681  | rs116418977 |
| rs116032709 | rs11607114  | rs116142917 | rs11621145  | rs116264669 | rs11632618  | rs11637716  | rs11641947  |
| rs1160328   | rs11607169  | rs11614333  | rs116211475 | rs116267673 | rs11632640  | rs11637783  | rs11642015  |
| rs116033001 | rs116072427 | rs11614730  | rs116211567 | rs11626933  | rs11632673  | rs116377985 | rs116420214 |
| rs11603334  | rs116073407 | rs11614785  | rs11621581  | rs11626972  | rs116326873 | rs11637887  | rs116420479 |
| rs116033650 | rs11607341  | rs11614818  | rs11621587  | rs11627032  | rs11633022  | rs116379131 | rs11642090  |
| rs11603453  | rs11607476  | rs11614913  | rs11621604  | rs11627052  | rs11633178  | rs11637971  | rs11642231  |
| rs116034739 | rs116075081 | rs11614914  | rs116216059 | rs116272812 | rs11633223  | rs11638016  | rs116423065 |
| rs11603538  | rs11607749  | rs116149201 | rs11621680  | rs11627326  | rs11633354  | rs11638064  | rs116423146 |
| rs116036161 | rs11607886  | rs11614986  | rs11621710  | rs11627348  | rs11633534  | rs116381680 | rs11642387  |
| rs11603634  | rs11607976  | rs11615482  | rs11621764  | rs116274237 | rs11633626  | rs11638204  | rs11642430  |
| rs11603691  | rs11608075  | rs11615503  | rs11621792  | rs116274727 | rs116338429 | rs11638256  | rs116424768 |

|             |             |             |             |             |             |             |             |
|-------------|-------------|-------------|-------------|-------------|-------------|-------------|-------------|
| rs116425179 | rs11646743  | rs11650788  | rs11655191  | rs116596081 | rs11666233  | rs11669915  | rs116734066 |
| rs11642529  | rs116467561 | rs116509918 | rs116551911 | rs11659764  | rs11666245  | rs11670016  | rs116734477 |
| rs11642583  | rs11646803  | rs11651052  | rs11655198  | rs11660335  | rs11666251  | rs11670020  | rs116735454 |
| rs11642612  | rs11646910  | rs116511141 | rs116552240 | rs11660468  | rs11666276  | rs11670030  | rs11673591  |
| rs11642631  | rs11646917  | rs1165150   | rs11655237  | rs11660655  | rs116662954 | rs11670056  | rs11673604  |
| rs11642657  | rs11647188  | rs1165151   | rs116552815 | rs116608013 | rs116663187 | rs11670119  | rs11673726  |
| rs116427960 | rs11647250  | rs1165152   | rs11655302  | rs11660889  | rs11666341  | rs11670190  | rs116739740 |
| rs11642841  | rs116473040 | rs11651596  | rs11655369  | rs11660937  | rs116663580 | rs11670206  | rs1167398   |
| rs11642873  | rs116473990 | rs1165165   | rs11655503  | rs11660938  | rs11666373  | rs116703588 | rs11673987  |
| rs11642957  | rs11647428  | rs11651755  | rs11655567  | rs11661028  | rs11666497  | rs11670370  | rs11674055  |
| rs11643024  | rs11647445  | rs1165176   | rs11655587  | rs116611511 | rs11666499  | rs11670527  | rs11674165  |
| rs11643192  | rs11647570  | rs1165178   | rs11655704  | rs11661202  | rs11666543  | rs11670534  | rs11674184  |
| rs11643209  | rs11647589  | rs11651809  | rs11655898  | rs11661305  | rs11666569  | rs11670562  | rs11674363  |
| rs11643225  | rs116475987 | rs116518462 | rs11655988  | rs11661542  | rs11666603  | rs11670658  | rs11674397  |
| rs11643240  | rs116477171 | rs1165187   | rs116561224 | rs11661654  | rs116666910 | rs11670714  | rs116745876 |
| rs116432568 | rs11647929  | rs11651885  | rs11656215  | rs116617502 | rs11666770  | rs116707723 | rs11674773  |
| rs11643303  | rs11648003  | rs11651955  | rs11656316  | rs11661806  | rs116668069 | rs11670934  | rs1167514   |
| rs116435220 | rs116480793 | rs1165196   | rs1165639   | rs116619972 | rs11666808  | rs11670986  | rs116751915 |
| rs11643654  | rs11648089  | rs11651968  | rs11656414  | rs116622332 | rs11666856  | rs11671005  | rs11675251  |
| rs11643656  | rs116480994 | rs1165205   | rs1165645   | rs11662271  | rs11666913  | rs11671010  | rs11675342  |
| rs116438126 | rs11648166  | rs11652075  | rs116565273 | rs116622969 | rs11666918  | rs116711774 | rs11675354  |
| rs11643929  | rs11648192  | rs1165209   | rs11656678  | rs116626164 | rs1166698   | rs116712274 | rs11675358  |
| rs11643990  | rs11648221  | rs11652097  | rs11656696  | rs11662622  | rs1166708   | rs11671274  | rs11675434  |
| rs11644034  | rs11648249  | rs1165213   | rs116567227 | rs11662721  | rs11667159  | rs11671304  | rs11675462  |
| rs11644125  | rs11648252  | rs11652139  | rs1165675   | rs11662730  | rs11667234  | rs116713089 | rs11675476  |
| rs11644362  | rs11648261  | rs11652228  | rs1165693   | rs11662800  | rs11667244  | rs11671314  | rs11675489  |
| rs116444385 | rs11648292  | rs11652230  | rs116569761 | rs11663049  | rs11667256  | rs11671319  | rs116755193 |
| rs11644446  | rs11648341  | rs11652272  | rs11657021  | rs11663050  | rs116672660 | rs1167132   | rs116755292 |
| rs11644510  | rs116483731 | rs11652463  | rs11657044  | rs11663156  | rs11667325  | rs11671326  | rs11675538  |
| rs116445911 | rs11648477  | rs11652501  | rs11657101  | rs116631966 | rs11667430  | rs11671360  | rs11675683  |
| rs11644601  | rs11648508  | rs116525159 | rs11657201  | rs11663217  | rs116674558 | rs11671654  | rs116757206 |
| rs116446171 | rs11648570  | rs11652522  | rs11657342  | rs116633139 | rs11667509  | rs11671664  | rs116760613 |
| rs116446669 | rs11648656  | rs11652527  | rs11657394  | rs11663346  | rs11667546  | rs11671710  | rs11676124  |
| rs11644696  | rs11648664  | rs11652684  | rs116576188 | rs11663393  | rs11667653  | rs116718137 | rs11676226  |
| rs11644758  | rs116486761 | rs11652757  | rs11657636  | rs11663596  | rs116676919 | rs116718588 | rs11676272  |
| rs11644997  | rs11648785  | rs11652874  | rs11657639  | rs11663602  | rs11667799  | rs11671893  | rs11676298  |
| rs11645002  | rs116487956 | rs11652985  | rs11657678  | rs11663678  | rs11667816  | rs11671925  | rs116763083 |
| rs116450299 | rs11648796  | rs116529867 | rs116577252 | rs11663694  | rs11667908  | rs11671930  | rs11676348  |
| rs11645045  | rs116488202 | rs11653144  | rs11657730  | rs11663772  | rs11667918  | rs11672020  | rs1167688   |
| rs11645157  | rs116488926 | rs11653176  | rs116577908 | rs11663816  | rs116679420 | rs11672104  | rs11676922  |
| rs11645302  | rs116491347 | rs116532272 | rs116578144 | rs11664106  | rs11667946  | rs11672110  | rs11677002  |
| rs11645565  | rs11649196  | rs11653258  | rs116578164 | rs11664123  | rs11668064  | rs11672111  | rs11677279  |
| rs11645649  | rs11649211  | rs11653260  | rs11657929  | rs11664298  | rs11668142  | rs11672139  | rs11677371  |
| rs11645657  | rs116493405 | rs11653286  | rs11657964  | rs11664336  | rs11668189  | rs116722486 | rs11677464  |
| rs11645898  | rs11649485  | rs11653357  | rs11657987  | rs11664369  | rs11668201  | rs11672313  | rs11677466  |
| rs11645975  | rs11649613  | rs11653367  | rs11658063  | rs11664704  | rs11668290  | rs11672343  | rs11677484  |
| rs1164598   | rs11649653  | rs11653383  | rs11658168  | rs11664848  | rs11668296  | rs11672387  | rs11677494  |
| rs11646052  | rs11649660  | rs11653468  | rs11658257  | rs11665020  | rs11668327  | rs11672460  | rs11677607  |
| rs11646066  | rs11649804  | rs11653623  | rs11658276  | rs11665052  | rs11668344  | rs11672485  | rs11677787  |
| rs116460775 | rs11649864  | rs11653686  | rs11658278  | rs11665070  | rs11668399  | rs116725014 | rs116778355 |
| rs116461055 | rs11650106  | rs116537337 | rs11658305  | rs11665111  | rs11668477  | rs11672517  | rs11677903  |
| rs11646118  | rs11650127  | rs11653826  | rs11658329  | rs11665242  | rs11668482  | rs11672567  | rs11677932  |
| rs11646127  | rs11650175  | rs11653958  | rs11658500  | rs11665344  | rs11668500  | rs11672597  | rs11677953  |
| rs116461399 | rs11650182  | rs116539778 | rs11658582  | rs11665364  | rs116685461 | rs11672660  | rs1167796   |
| rs11646213  | rs116502302 | rs11654074  | rs11658587  | rs11665567  | rs11668719  | rs11672691  | rs1167800   |
| rs11646221  | rs11650304  | rs116542483 | rs11658674  | rs116656374 | rs11668882  | rs11672713  | rs1167802   |
| rs11646229  | rs11650324  | rs11654387  | rs11658722  | rs11665661  | rs11668950  | rs11672748  | rs11678106  |
| rs11646287  | rs116503776 | rs11654523  | rs11658786  | rs11665676  | rs11669133  | rs11672900  | rs11678188  |
| rs11646401  | rs11650438  | rs11654644  | rs11658815  | rs116656892 | rs11669334  | rs11672983  | rs1167821   |
| rs11646417  | rs116504838 | rs11654671  | rs116588314 | rs11665716  | rs11669345  | rs11673000  | rs1167827   |
| rs11646575  | rs11650494  | rs11654749  | rs11658872  | rs11665748  | rs11669407  | rs11673023  | rs116782923 |
| rs116466121 | rs116505298 | rs11654954  | rs11658976  | rs11665867  | rs11669443  | rs11673093  | rs11678354  |
| rs116466468 | rs11650571  | rs116549635 | rs11659248  | rs11665880  | rs11669479  | rs1167311   | rs116784299 |
| rs116466979 | rs11650665  | rs11655024  | rs116593970 | rs11666065  | rs11669500  | rs11673139  | rs11678462  |
| rs11646700  | rs116506680 | rs11655056  | rs11659457  | rs11666078  | rs11669576  | rs11673209  | rs11678466  |
| rs1164671   | rs11650677  | rs11655081  | rs11659559  | rs116661163 | rs116697020 | rs11673344  | rs11678584  |
| rs11646715  | rs11650725  | rs11655160  | rs11659570  | rs116662199 | rs11669910  | rs11673346  | rs11678685  |



|             |             |             |             |             |             |             |             |
|-------------|-------------|-------------|-------------|-------------|-------------|-------------|-------------|
| rs11678825  | rs11683001  | rs11687659  | rs116918730 | rs11694863  | rs117003805 | rs11706682  | rs11710845  |
| rs11678980  | rs11683202  | rs11687736  | rs116920018 | rs116948922 | rs117004810 | rs11706810  | rs117108573 |
| rs11679120  | rs11683203  | rs11687765  | rs116920450 | rs116948941 | rs11700551  | rs11706832  | rs11711047  |
| rs11679146  | rs11683207  | rs116878033 | rs116920534 | rs11694902  | rs117005905 | rs117068593 | rs11711099  |
| rs116791765 | rs11683268  | rs116878242 | rs116922607 | rs11694904  | rs117006983 | rs11706981  | rs11711157  |
| rs11679294  | rs116832992 | rs11687833  | rs11692326  | rs116949436 | rs117007668 | rs117070989 | rs117111740 |
| rs11679303  | rs11683361  | rs116878472 | rs116923389 | rs11695051  | rs117008454 | rs117071519 | rs117111916 |
| rs11679328  | rs116834467 | rs11688048  | rs11692391  | rs11695105  | rs11700909  | rs117072053 | rs11711320  |
| rs11679338  | rs11683459  | rs116881820 | rs11692429  | rs11695202  | rs11700925  | rs117073213 | rs117113213 |
| rs11679380  | rs116835963 | rs11688237  | rs11692435  | rs11695281  | rs11700980  | rs117073808 | rs117113238 |
| rs11679557  | rs11683669  | rs11688289  | rs116924815 | rs116953263 | rs117010584 | rs11707416  | rs117113357 |
| rs11679564  | rs11683692  | rs11688303  | rs116924819 | rs116953792 | rs11701104  | rs11707420  | rs11711420  |
| rs116795853 | rs11683711  | rs116883886 | rs116925373 | rs11695484  | rs11701269  | rs11707429  | rs11711441  |
| rs11679640  | rs11683933  | rs11688492  | rs11692564  | rs116954921 | rs11701433  | rs117074560 | rs11711542  |
| rs11679645  | rs116839776 | rs11688530  | rs11692570  | rs116955121 | rs11701512  | rs11707471  | rs117115609 |
| rs11679731  | rs11684030  | rs11688682  | rs11692692  | rs11695609  | rs11701532  | rs11707501  | rs11711770  |
| rs11679753  | rs1168404   | rs116887602 | rs116926994 | rs116956554 | rs11701561  | rs11707506  | rs117118217 |
| rs11679837  | rs116840852 | rs11688767  | rs11692723  | rs11695747  | rs1170174   | rs117078022 | rs11711864  |
| rs11679889  | rs116841148 | rs11688802  | rs116927526 | rs116957652 | rs117017689 | rs11707807  | rs11712037  |
| rs11679943  | rs11684146  | rs11688816  | rs1169284   | rs116957783 | rs11701802  | rs11707890  | rs11712056  |
| rs1167998   | rs11684168  | rs11688896  | rs11692858  | rs116959924 | rs11701836  | rs117079142 | rs11712061  |
| rs116799967 | rs11684176  | rs116889104 | rs1169286   | rs11695997  | rs117018441 | rs11707962  | rs11712065  |
| rs11680034  | rs11684254  | rs11689011  | rs11692867  | rs11696002  | rs11701973  | rs11708026  | rs11712066  |
| rs11680058  | rs11684299  | rs11689193  | rs1169288   | rs11696009  | rs11702148  | rs11708067  | rs117121174 |
| rs1168013   | rs116843064 | rs11689199  | rs1169289   | rs11696039  | rs11702209  | rs11708163  | rs11712165  |
| rs11680233  | rs11684404  | rs116893196 | rs116928965 | rs116961202 | rs117023868 | rs11708187  | rs11712192  |
| rs1168029   | rs116844387 | rs11689538  | rs1169292   | rs11696169  | rs11702494  | rs11708337  | rs11712223  |
| rs1168041   | rs11684463  | rs11689553  | rs1169294   | rs116962250 | rs117026123 | rs117085232 | rs117123217 |
| rs11680449  | rs11684511  | rs11689621  | rs1169299   | rs11696394  | rs11702617  | rs117085301 | rs117123242 |
| rs116804861 | rs11684564  | rs11689667  | rs11693007  | rs116964396 | rs117026326 | rs11708540  | rs117123883 |
| rs11680584  | rs116845987 | rs116896792 | rs1169301   | rs11696739  | rs117026536 | rs11708578  | rs117124817 |
| rs116805908 | rs116846195 | rs116898861 | rs11693031  | rs116967397 | rs117026595 | rs11708647  | rs117124984 |
| rs11680709  | rs116847786 | rs11689890  | rs1169306   | rs116967872 | rs117026974 | rs117086479 | rs117125309 |
| rs116807401 | rs116848211 | rs11689956  | rs11693094  | rs116968049 | rs11702779  | rs117087731 | rs11712552  |
| rs11680788  | rs11684828  | rs11689995  | rs1169310   | rs116968606 | rs11702843  | rs11708774  | rs11712680  |
| rs11680809  | rs11684853  | rs11690185  | rs1169313   | rs11696891  | rs117028614 | rs11708779  | rs117128711 |
| rs11680831  | rs116850263 | rs11690224  | rs1169314   | rs116969723 | rs11702924  | rs11708895  | rs11712982  |
| rs116808538 | rs11685299  | rs116904359 | rs116931652 | rs116970203 | rs11703032  | rs11708955  | rs117129959 |
| rs11680860  | rs116853509 | rs11690539  | rs11693247  | rs11697087  | rs11703376  | rs11708996  | rs117130360 |
| rs11680969  | rs116853582 | rs11690571  | rs11693320  | rs11697151  | rs117037340 | rs11709060  | rs117130511 |
| rs11680975  | rs11685418  | rs11690597  | rs11693321  | rs11697186  | rs117037877 | rs11709077  | rs11713141  |
| rs1168113   | rs11685491  | rs11690661  | rs11693404  | rs116971887 | rs11703813  | rs11709159  | rs11713169  |
| rs1168114   | rs116855232 | rs11690710  | rs116934984 | rs11697300  | rs117038461 | rs11709377  | rs117132064 |
| rs11681145  | rs116856853 | rs116907128 | rs11693526  | rs11697311  | rs11703948  | rs11709402  | rs11713251  |
| rs11681214  | rs116857878 | rs1169072   | rs11693528  | rs11697333  | rs1170426   | rs117095258 | rs117132860 |
| rs11681227  | rs11685794  | rs116907394 | rs11693537  | rs116973462 | rs11704277  | rs11709625  | rs11713363  |
| rs116812356 | rs11685902  | rs11690748  | rs11693697  | rs11697371  | rs1170439   | rs117097449 | rs117133909 |
| rs1168127   | rs1168594   | rs116907627 | rs11693702  | rs11697428  | rs11704481  | rs11709758  | rs11713601  |
| rs1168128   | rs11685995  | rs1169078   | rs11693764  | rs11697492  | rs11704551  | rs117097909 | rs11713634  |
| rs11681299  | rs116861182 | rs1169081   | rs11693806  | rs11697610  | rs117047270 | rs11709868  | rs117137535 |
| rs1168132   | rs11686135  | rs116908763 | rs11693885  | rs11697677  | rs117047297 | rs11709963  | rs117137947 |
| rs11681462  | rs11686139  | rs11690881  | rs116938877 | rs11697690  | rs11704827  | rs1171      | rs11713899  |
| rs11681525  | rs11686262  | rs11690883  | rs11693908  | rs116978226 | rs11704880  | rs11710037  | rs117139027 |
| rs116817194 | rs116865000 | rs116909374 | rs116940348 | rs11697848  | rs11704898  | rs11710077  | rs11714050  |
| rs11681740  | rs11686508  | rs11690961  | rs116940352 | rs116978932 | rs117049462 | rs117100864 | rs11714208  |
| rs11681888  | rs11686855  | rs116910459 | rs11694172  | rs116979562 | rs11705370  | rs11710258  | rs11714248  |
| rs116819734 | rs11686893  | rs11691134  | rs11694173  | rs11698093  | rs117053853 | rs117103342 | rs11714286  |
| rs11682084  | rs11686934  | rs11691214  | rs11694441  | rs116987964 | rs11705555  | rs1171040   | rs11714337  |
| rs116821116 | rs11686949  | rs11691270  | rs11694449  | rs11698914  | rs11705627  | rs1171044   | rs11714441  |
| rs11682175  | rs116869525 | rs116913103 | rs116944925 | rs116990752 | rs11705729  | rs11710456  | rs11714455  |
| rs11682186  | rs11687123  | rs11691369  | rs11694518  | rs11699481  | rs117059302 | rs117104597 | rs117145034 |
| rs116822326 | rs11687170  | rs11691486  | rs11694601  | rs11699612  | rs11705932  | rs11710504  | rs117145170 |
| rs116825096 | rs116873087 | rs11691517  | rs116946461 | rs116996456 | rs11706071  | rs11710567  | rs117145500 |
| rs116826172 | rs116874284 | rs116915373 | rs11694657  | rs11699802  | rs11706108  | rs117106225 | rs11714679  |
| rs116826541 | rs11687457  | rs116916700 | rs11694658  | rs11699828  | rs117062702 | rs117107187 | rs117147772 |
| rs11682804  | rs11687520  | rs11691805  | rs1169479   | rs117001013 | rs117063744 | rs117107603 | rs11714843  |
| rs116828404 | rs116875887 | rs11691869  | rs11694842  | rs11700264  | rs117064827 | rs117108011 | rs117148746 |

|             |             |             |             |             |             |             |             |
|-------------|-------------|-------------|-------------|-------------|-------------|-------------|-------------|
| rs117152417 | rs11720041  | rs117238625 | rs11727978  | rs11733439  | rs117399007 | rs11745324  | rs117496431 |
| rs1171548   | rs11720093  | rs11723889  | rs117280728 | rs11733695  | rs11739906  | rs11745493  | rs117496573 |
| rs11715524  | rs11720094  | rs11724009  | rs1172822   | rs11733845  | rs117400692 | rs117455294 | rs117496742 |
| rs11715566  | rs11720098  | rs11724031  | rs11728253  | rs117338687 | rs117401122 | rs11745586  | rs11749731  |
| rs11715604  | rs11720108  | rs11724094  | rs117284239 | rs117338748 | rs11740246  | rs11745603  | rs117498071 |
| rs117156175 | rs11720121  | rs11724116  | rs11728572  | rs11734075  | rs11740254  | rs11745702  | rs11749904  |
| rs1171563   | rs11720145  | rs11724233  | rs117287096 | rs11734099  | rs11740474  | rs11745795  | rs11749912  |
| rs11715835  | rs11720167  | rs117242440 | rs11728712  | rs11734132  | rs11740542  | rs117459045 | rs117499775 |
| rs11715919  | rs11720236  | rs117243052 | rs117288711 | rs117342529 | rs117405640 | rs11746     | rs11750130  |
| rs117159862 | rs11720408  | rs11724319  | rs11729023  | rs11734373  | rs117406288 | rs11746028  | rs11750208  |
| rs11716015  | rs117204111 | rs11724371  | rs11729053  | rs11734408  | rs117407105 | rs1174604   | rs11750385  |
| rs1171602   | rs117204589 | rs11724531  | rs117291242 | rs11734460  | rs117407608 | rs117460458 | rs11750560  |
| rs1171606   | rs117204628 | rs117245733 | rs11729169  | rs1173461   | rs117410836 | rs117461235 | rs11750568  |
| rs117160808 | rs11720469  | rs11724582  | rs117292351 | rs1173470   | rs1174117   | rs11746309  | rs117506082 |
| rs11716087  | rs11720523  | rs117246174 | rs117293193 | rs11734754  | rs11741255  | rs11746314  | rs11750854  |
| rs11716109  | rs117205714 | rs11724635  | rs11729441  | rs11734970  | rs11741260  | rs117463496 | rs11751024  |
| rs1171614   | rs117206369 | rs11724647  | rs1172955   | rs117350179 | rs11741390  | rs117463603 | rs117511681 |
| rs1171615   | rs117206641 | rs117246501 | rs117297304 | rs11735092  | rs11741640  | rs117463770 | rs11751172  |
| rs1171616   | rs11720684  | rs117246624 | rs117298325 | rs117351529 | rs11741671  | rs11746443  | rs117512594 |
| rs1171617   | rs11720739  | rs11724690  | rs117298830 | rs11735310  | rs11741704  | rs11746506  | rs117513282 |
| rs117162013 | rs11720789  | rs117247077 | rs117299744 | rs117353193 | rs117417690 | rs117465168 | rs11751347  |
| rs117163080 | rs117208012 | rs117247290 | rs11730082  | rs117354958 | rs11741775  | rs11746555  | rs11751495  |
| rs11716398  | rs11720810  | rs11724750  | rs117300835 | rs117355297 | rs11741826  | rs11746729  | rs11751591  |
| rs11716413  | rs117208459 | rs117247884 | rs11730129  | rs11735662  | rs117418264 | rs11746801  | rs11751605  |
| rs11716527  | rs11720938  | rs11724804  | rs11730169  | rs117357866 | rs117418297 | rs11746859  | rs117516426 |
| rs11716531  | rs117209788 | rs117248841 | rs11730399  | rs117359636 | rs11741861  | rs117468663 | rs117517139 |
| rs1171659   | rs11720985  | rs11725345  | rs117304774 | rs117360596 | rs11742240  | rs117468730 | rs11751804  |
| rs11716727  | rs11721007  | rs117253780 | rs11730623  | rs11736191  | rs11742251  | rs11746901  | rs117518788 |
| rs117167357 | rs11721059  | rs11725502  | rs11730631  | rs117363462 | rs117424492 | rs117469893 | rs11751920  |
| rs11716779  | rs1172113   | rs117255102 | rs11730662  | rs11736348  | rs11742501  | rs11747001  | rs11752218  |
| rs11716820  | rs117211505 | rs11725618  | rs11730676  | rs11736561  | rs117425313 | rs117470167 | rs117522510 |
| rs11716897  | rs117211511 | rs11725653  | rs117309129 | rs117366905 | rs11742570  | rs11747270  | rs117524646 |
| rs11716948  | rs1172123   | rs11725704  | rs11731003  | rs117368206 | rs117426182 | rs117473347 | rs117524719 |
| rs117170334 | rs1172128   | rs117258330 | rs117310669 | rs11736863  | rs117427818 | rs11747340  | rs117524812 |
| rs11717195  | rs1172129   | rs11725861  | rs11731267  | rs11736866  | rs11742873  | rs11747360  | rs11752498  |
| rs11717285  | rs1172130   | rs11725921  | rs11731274  | rs11736994  | rs117429320 | rs11747514  | rs117525469 |
| rs117173251 | rs1172135   | rs11725926  | rs11731416  | rs11737     | rs11743006  | rs11747559  | rs117526247 |
| rs117173376 | rs1172147   | rs11725969  | rs11731421  | rs117370443 | rs117430166 | rs11747772  | rs11752626  |
| rs11717368  | rs117214796 | rs11726072  | rs11731606  | rs117372389 | rs117430989 | rs11747786  | rs11752730  |
| rs11717383  | rs1172149   | rs117261012 | rs117316450 | rs1173727   | rs117431198 | rs117478007 | rs11752759  |
| rs117174199 | rs1172152   | rs11726181  | rs117317282 | rs1173730   | rs11743151  | rs11747856  | rs11752784  |
| rs117176448 | rs11721691  | rs11726195  | rs117318607 | rs11737459  | rs11743174  | rs11748023  | rs117531891 |
| rs11717778  | rs11721984  | rs117261995 | rs117318847 | rs117374667 | rs117432766 | rs11748027  | rs11753207  |
| rs11717836  | rs11721999  | rs11726248  | rs11731886  | rs1173766   | rs11743303  | rs117481343 | rs11753208  |
| rs11717844  | rs11722021  | rs11726436  | rs117319730 | rs1173771   | rs11743404  | rs11748173  | rs11753309  |
| rs117181309 | rs11722225  | rs117264457 | rs11732089  | rs11738093  | rs11743474  | rs117482524 | rs11753319  |
| rs117182230 | rs11722228  | rs117265206 | rs117321474 | rs11738146  | rs117435593 | rs11748297  | rs11753362  |
| rs117182261 | rs117222687 | rs117265681 | rs11732160  | rs11738223  | rs117435644 | rs117483136 | rs117533700 |
| rs1171832   | rs117224174 | rs117267308 | rs117321697 | rs11738281  | rs117436140 | rs11748327  | rs117537850 |
| rs11718322  | rs11722554  | rs117267808 | rs11732213  | rs117382825 | rs11743810  | rs117483894 | rs117538213 |
| rs117183447 | rs11722569  | rs11726786  | rs117322171 | rs11738611  | rs117438382 | rs117483990 | rs117538856 |
| rs11718418  | rs11722779  | rs11726848  | rs11732231  | rs11738854  | rs11743851  | rs11748603  | rs1175394   |
| rs11718560  | rs11722924  | rs117268623 | rs117324075 | rs117388573 | rs11743919  | rs11748619  | rs1175396   |
| rs11718633  | rs1172294   | rs11726946  | rs117325001 | rs11738946  | rs117440602 | rs1174864   | rs117539635 |
| rs117186940 | rs117229942 | rs11726981  | rs11732511  | rs11738974  | rs11744148  | rs11748651  | rs11753995  |
| rs117188914 | rs117230571 | rs117269860 | rs117325217 | rs117390648 | rs11744374  | rs117486637 | rs117540572 |
| rs11718898  | rs117230773 | rs11727189  | rs11732657  | rs11739101  | rs11744391  | rs11748963  | rs117540983 |
| rs11718956  | rs11723207  | rs117272076 | rs117326834 | rs11739158  | rs117443987 | rs117489831 | rs11754288  |
| rs117189591 | rs117232140 | rs117272108 | rs117327231 | rs117395088 | rs117444986 | rs11749004  | rs117543324 |
| rs11718982  | rs11723275  | rs11727273  | rs11732763  | rs11739663  | rs11744543  | rs11749040  | rs117543466 |
| rs11719201  | rs117233107 | rs117273305 | rs117327684 | rs117398064 | rs11744663  | rs117490883 | rs11754632  |
| rs11719438  | rs11723371  | rs117273411 | rs11732810  | rs11739827  | rs117446694 | rs11749176  | rs11754661  |
| rs11719450  | rs117233795 | rs11727369  | rs117328695 | rs11739847  | rs117446815 | rs117492019 | rs11754682  |
| rs11719526  | rs11723436  | rs11727468  | rs11732896  | rs117398731 | rs11744829  | rs11749255  | rs11754773  |
| rs11719685  | rs117236107 | rs11727676  | rs11733284  | rs11739877  | rs11744876  | rs11749327  | rs117548270 |
| rs11719821  | rs11723621  | rs11727735  | rs11733359  | rs117398778 | rs11745123  | rs11749391  | rs117549504 |
| rs11719975  | rs11723763  | rs11727963  | rs117334031 | rs117399000 | rs11745300  | rs117494579 | rs117551406 |

|             |             |             |             |             |             |             |             |
|-------------|-------------|-------------|-------------|-------------|-------------|-------------|-------------|
| rs117551578 | rs11759950  | rs11764631  | rs117705146 | rs117749721 | rs11780023  | rs11784833  | rs117897057 |
| rs11755164  | rs117599630 | rs117646359 | rs11770630  | rs11774977  | rs11780136  | rs11784888  | rs11789753  |
| rs117552144 | rs11760284  | rs11764665  | rs117706710 | rs11775030  | rs11780156  | rs11784903  | rs1178977   |
| rs11755266  | rs11760290  | rs11764670  | rs117706999 | rs117752187 | rs11780200  | rs117849038 | rs11789773  |
| rs117553902 | rs11760376  | rs117647886 | rs11770817  | rs11775314  | rs117802187 | rs11784932  | rs1178979   |
| rs11755391  | rs11760406  | rs11764879  | rs11770907  | rs117753190 | rs11780222  | rs117849885 | rs11789875  |
| rs11755393  | rs11760407  | rs117648907 | rs117710327 | rs11775334  | rs11780263  | rs11785001  | rs117898875 |
| rs11755421  | rs117605016 | rs117649976 | rs11771053  | rs117754181 | rs117803005 | rs11785041  | rs11789898  |
| rs117554445 | rs11761054  | rs117651013 | rs11771145  | rs11775560  | rs117804109 | rs11785093  | rs117900708 |
| rs117554512 | rs11761083  | rs11765189  | rs11771168  | rs11775702  | rs11780471  | rs11785239  | rs11790131  |
| rs1175548   | rs117612135 | rs11765387  | rs11771259  | rs11775706  | rs11780610  | rs11785335  | rs117902240 |
| rs1175550   | rs117612447 | rs11765436  | rs11771301  | rs117758012 | rs11780633  | rs117853367 | rs11790341  |
| rs11755527  | rs11761352  | rs11765450  | rs117714106 | rs117758180 | rs117809422 | rs11785369  | rs11790360  |
| rs117556162 | rs11761408  | rs11765583  | rs11771693  | rs11775886  | rs117809695 | rs117855597 | rs117903946 |
| rs117557198 | rs117614122 | rs11765649  | rs11771699  | rs117759106 | rs11780978  | rs11785562  | rs11790439  |
| rs11755724  | rs11761528  | rs117656550 | rs117717824 | rs117760119 | rs1178099   | rs11785816  | rs117904573 |
| rs11755845  | rs117615688 | rs11765748  | rs11771799  | rs11776287  | rs117809958 | rs11785932  | rs117911387 |
| rs11756035  | rs117616209 | rs117657830 | rs117718271 | rs11776293  | rs11781008  | rs11785995  | rs117911989 |
| rs117560412 | rs117616320 | rs11765979  | rs117718416 | rs117763335 | rs1178101   | rs11786083  | rs117913124 |
| rs117560908 | rs117617134 | rs11766051  | rs11771982  | rs11776339  | rs11781016  | rs11786084  | rs117913411 |
| rs11756123  | rs117617821 | rs117662433 | rs11771984  | rs117764941 | rs117810464 | rs11786130  | rs117916638 |
| rs117561482 | rs117618017 | rs11766298  | rs11772036  | rs11776511  | rs11781149  | rs11786352  | rs11791671  |
| rs117561879 | rs117618124 | rs11766326  | rs11772108  | rs11776693  | rs11781222  | rs117864888 | rs11791747  |
| rs11756214  | rs117618307 | rs11766468  | rs11772187  | rs11776713  | rs11781321  | rs117865811 | rs117919628 |
| rs11756347  | rs117618570 | rs117668569 | rs11772232  | rs117767473 | rs11781551  | rs117865832 | rs11792038  |
| rs11756438  | rs117618575 | rs11766965  | rs1177228   | rs11776767  | rs117815558 | rs11786598  | rs117921553 |
| rs1175646   | rs117618901 | rs117670375 | rs117723077 | rs11776831  | rs11781592  | rs11786677  | rs11792294  |
| rs117565673 | rs117619823 | rs11767162  | rs11772444  | rs11776845  | rs11781667  | rs11786685  | rs117925626 |
| rs11756659  | rs11762011  | rs11767188  | rs11772470  | rs11776911  | rs11781692  | rs117868203 | rs11792861  |
| rs11756673  | rs117620244 | rs117672662 | rs117724978 | rs11776973  | rs11781816  | rs117868506 | rs11792867  |
| rs11756806  | rs11762074  | rs11767283  | rs1177268   | rs117769774 | rs11781985  | rs11786868  | rs117928826 |
| rs117569858 | rs11762096  | rs11767338  | rs11772703  | rs1177701   | rs11782074  | rs11786894  | rs11792948  |
| rs11757201  | rs117621405 | rs11767400  | rs11772705  | rs117770268 | rs117821803 | rs11786896  | rs117929802 |
| rs11757278  | rs11762311  | rs117674943 | rs11772758  | rs11777239  | rs11782259  | rs11786982  | rs11793074  |
| rs117573112 | rs117623407 | rs11767557  | rs1177279   | rs117775520 | rs11782435  | rs117870289 | rs117934006 |
| rs117574354 | rs117624659 | rs11767715  | rs11772848  | rs1177765   | rs117824460 | rs117870634 | rs11793462  |
| rs11757577  | rs11762469  | rs11767774  | rs11772895  | rs117776753 | rs11782610  | rs117871957 | rs117934917 |
| rs117576073 | rs11762512  | rs117677995 | rs11773147  | rs117777118 | rs11782652  | rs11787216  | rs117935223 |
| rs117576908 | rs117625825 | rs11767893  | rs117733303 | rs11777719  | rs117826558 | rs117873131 | rs117936590 |
| rs117578199 | rs11762784  | rs11768053  | rs117734003 | rs11777835  | rs11782670  | rs11787365  | rs11793768  |
| rs11757903  | rs117630493 | rs1176815   | rs117734071 | rs11777872  | rs117827273 | rs11787407  | rs11793831  |
| rs11758031  | rs117631366 | rs117683492 | rs117735241 | rs117778740 | rs117828698 | rs11787412  | rs117939808 |
| rs117582568 | rs11763147  | rs11768365  | rs117735470 | rs11777976  | rs117829095 | rs117874826 | rs11794056  |
| rs117583072 | rs11763186  | rs117684527 | rs11773627  | rs1177803   | rs11783015  | rs11787792  | rs117941271 |
| rs11758351  | rs117632017 | rs11768481  | rs117736811 | rs11778040  | rs11783023  | rs11787922  | rs11794152  |
| rs11758377  | rs1176321   | rs11768540  | rs117737118 | rs11778219  | rs117830785 | rs11788118  | rs117942686 |
| rs117584427 | rs11763230  | rs11768577  | rs117737783 | rs11778229  | rs11783093  | rs117883100 | rs117948041 |
| rs11758482  | rs11763267  | rs117686021 | rs11773804  | rs11778247  | rs117831057 | rs11788336  | rs11794847  |
| rs117585797 | rs11763338  | rs117687565 | rs11773845  | rs117783785 | rs117834099 | rs11788591  | rs117949012 |
| rs117587217 | rs117633859 | rs11768817  | rs11773884  | rs1177847   | rs11783418  | rs11788633  | rs1179494   |
| rs11758777  | rs11763750  | rs11768845  | rs117739035 | rs117784795 | rs117834366 | rs117886461 | rs11794984  |
| rs11758778  | rs11763856  | rs11769000  | rs11773992  | rs117784871 | rs117834487 | rs117888112 | rs11795066  |
| rs11758943  | rs117638970 | rs117691857 | rs11774048  | rs11778724  | rs11783469  | rs11788926  | rs11795079  |
| rs11759018  | rs117639576 | rs11769224  | rs117740768 | rs11778726  | rs117835232 | rs11789013  | rs11795150  |
| rs11759026  | rs117640426 | rs117692263 | rs11774212  | rs117787553 | rs11783562  | rs11789015  | rs117952191 |
| rs11759064  | rs11764098  | rs117692586 | rs11774221  | rs117788567 | rs11783655  | rs11789249  | rs11795222  |
| rs11759126  | rs11764163  | rs117692895 | rs117742247 | rs11778934  | rs11783703  | rs117892760 | rs117952616 |
| rs11759190  | rs11764171  | rs117695016 | rs117742456 | rs11779013  | rs11783772  | rs117893056 | rs117952826 |
| rs117592625 | rs11764212  | rs11769630  | rs117744081 | rs117793008 | rs11784052  | rs117893233 | rs11795343  |
| rs11759522  | rs117642368 | rs11769676  | rs117744355 | rs117793618 | rs11784090  | rs11789399  | rs117954051 |
| rs11759553  | rs117642733 | rs11769858  | rs11774568  | rs11779446  | rs1178437   | rs1178947   | rs117955096 |
| rs117595678 | rs117642896 | rs117701289 | rs11774578  | rs11779459  | rs117843845 | rs117895796 | rs117956829 |
| rs117596388 | rs11764390  | rs11770148  | rs11774700  | rs11779535  | rs117843963 | rs11789603  | rs11796053  |
| rs11759732  | rs11764404  | rs117701653 | rs117747069 | rs11779675  | rs117844066 | rs117896175 | rs117960796 |
| rs11759769  | rs117644533 | rs11770285  | rs11774829  | rs11779723  | rs117844704 | rs11789653  | rs117961539 |
| rs117598310 | rs11764536  | rs11770437  | rs117748422 | rs11779860  | rs11784499  | rs117896735 | rs11796357  |
| rs11759908  | rs117646290 | rs11770446  | rs11774915  | rs117799466 | rs11784619  | rs1178968   | rs117963839 |

|             |             |             |            |            |            |            |            |
|-------------|-------------|-------------|------------|------------|------------|------------|------------|
| rs117964204 | rs118067556 | rs118130881 | rs1182197  | rs11841945 | rs11855220 | rs11867297 | rs11877825 |
| rs117964596 | rs118067673 | rs118131161 | rs11822234 | rs11842790 | rs11855415 | rs11867412 | rs11878180 |
| rs117965239 | rs11806789  | rs118131223 | rs11822642 | rs11842871 | rs11855468 | rs11867479 | rs1187820  |
| rs117967122 | rs118068052 | rs11813268  | rs11822813 | rs11842874 | rs1185567  | rs11867618 | rs11878235 |
| rs117968336 | rs11806839  | rs118134876 | rs11822830 | rs11843816 | rs11855741 | rs11867840 | rs11878507 |
| rs11796997  | rs118068821 | rs118135001 | rs11822910 | rs11844552 | rs11855853 | rs11867902 | rs11878568 |
| rs11797074  | rs118070237 | rs118135146 | rs11823251 | rs11844632 | rs11856122 | rs11868035 | rs11878602 |
| rs11797190  | rs118071012 | rs11813604  | rs11823543 | rs11844732 | rs11856307 | rs1186818  | rs11878604 |
| rs117974417 | rs11807162  | rs118136305 | rs11823828 | rs11844752 | rs11856493 | rs11868206 | rs11879162 |
| rs117976152 | rs11807193  | rs11813727  | rs1182389  | rs11844846 | rs11856579 | rs11868441 | rs11879191 |
| rs117977586 | rs118072533 | rs118137874 | rs1182394  | rs1184523  | rs11856829 | rs11868709 | rs11879227 |
| rs117984432 | rs11807366  | rs11814082  | rs11823949 | rs11845244 | rs11856837 | rs11869286 | rs11879706 |
| rs117984853 | rs11807418  | rs11814327  | rs1182395  | rs11845506 | rs11856926 | rs11869363 | rs11879798 |
| rs117987711 | rs118074491 | rs11814448  | rs11824092 | rs11845599 | rs1185700  | rs11869513 | rs11879838 |
| rs117989138 | rs118074499 | rs118145918 | rs1182436  | rs11845708 | rs11857185 | rs11869530 | rs11879917 |
| rs1179907   | rs11807602  | rs118146059 | rs1182444  | rs11845781 | rs11857230 | rs11869940 | rs11880023 |
| rs117990941 | rs118078182 | rs118146369 | rs11824734 | rs11846278 | rs11857515 | rs11870246 | rs11880064 |
| rs117992102 | rs118080406 | rs118146573 | rs11825181 | rs11846409 | rs11857609 | rs11870594 | rs11880141 |
| rs117992292 | rs11808092  | rs118147862 | rs1182531  | rs11846575 | rs11857976 | rs11870603 | rs11880195 |
| rs11799474  | rs11808210  | rs118149273 | rs1182532  | rs11846595 | rs11858071 | rs11870735 | rs11880219 |
| rs117997962 | rs118084662 | rs11814929  | rs11826064 | rs1184662  | rs11858077 | rs11870935 | rs11880333 |
| rs117998971 | rs11808675  | rs11814950  | rs11826529 | rs11846704 | rs11858280 | rs11871043 | rs11880801 |
| rs11800059  | rs11808696  | rs118150334 | rs11827215 | rs11846838 | rs11858316 | rs11871061 | rs11880992 |
| rs118003225 | rs118086960 | rs118151305 | rs11827790 | rs11846959 | rs11858463 | rs11871109 | rs11881070 |
| rs11800505  | rs118087478 | rs118152978 | rs11828343 | rs11847263 | rs11858759 | rs11871125 | rs11881343 |
| rs118005503 | rs11808748  | rs118158982 | rs1182864  | rs11847697 | rs11858836 | rs11871285 | rs11881367 |
| rs118009556 | rs11808787  | rs118159104 | rs11829086 | rs11847782 | rs11858857 | rs11871317 | rs11881383 |
| rs118012496 | rs1180894   | rs118160033 | rs1182933  | rs11848179 | rs11858992 | rs11871429 | rs11881751 |
| rs118013485 | rs118090537 | rs1181602   | rs11830103 | rs11848361 | rs11859365 | rs1187162  | rs11881756 |
| rs118013985 | rs118091226 | rs118160950 | rs11830157 | rs11848686 | rs11859370 | rs11871801 | rs11881865 |
| rs118016429 | rs11809140  | rs118161330 | rs11830166 | rs11848760 | rs11859517 | rs11872020 | rs11881955 |
| rs118017491 | rs11809180  | rs118166957 | rs11830241 | rs11848769 | rs11860417 | rs11872104 | rs11882273 |
| rs118017926 | rs118091978 | rs11816944  | rs11830243 | rs11848785 | rs11860560 | rs11872159 | rs11882292 |
| rs118017965 | rs118093058 | rs118172483 | rs11830764 | rs11849582 | rs11860650 | rs1187219  | rs11882796 |
| rs11802147  | rs1180949   | rs118173262 | rs1183079  | rs11850055 | rs11860711 | rs11872397 | rs1188285  |
| rs11802413  | rs11809589  | rs118173451 | rs1183201  | rs11850550 | rs11861214 | rs11872481 | rs1188292  |
| rs118024629 | rs11809700  | rs118174290 | rs11832031 | rs11850946 | rs11861256 | rs1187256  | rs11883511 |
| rs118026302 | rs118097312 | rs118174674 | rs11833289 | rs11851199 | rs11861335 | rs1187257  | rs11883686 |
| rs118028745 | rs118099348 | rs118176061 | rs11833310 | rs11851435 | rs11861362 | rs1187264  | rs11883967 |
| rs11802893  | rs118099815 | rs118177209 | rs11833313 | rs11851603 | rs11861766 | rs11872713 | rs11884476 |
| rs118028964 | rs118100927 | rs118181489 | rs11833948 | rs11852029 | rs1186222  | rs1187280  | rs11884495 |
| rs11802995  | rs118101047 | rs118184408 | rs11834788 | rs11852059 | rs11862309 | rs1187326  | rs11884596 |
| rs118030951 | rs11810108  | rs11818463  | rs11835818 | rs1185209  | rs11862382 | rs11873305 | rs11884770 |
| rs11803128  | rs11810109  | rs118186763 | rs11836108 | rs11852334 | rs11862481 | rs11873439 | rs11884776 |
| rs118033845 | rs11810110  | rs1181870   | rs11836880 | rs11852372 | rs11863709 | rs1187352  | rs11885663 |
| rs11803553  | rs118101215 | rs118187252 | rs11837407 | rs11852650 | rs11863726 | rs11873906 | rs11885668 |
| rs118035855 | rs11810217  | rs11818760  | rs11837918 | rs11852820 | rs11864054 | rs11874    | rs11885932 |
| rs118036692 | rs118102869 | rs11818906  | rs11838267 | rs11853189 | rs11864066 | rs11874040 | rs11886495 |
| rs11803731  | rs118104581 | rs118190591 | rs11838472 | rs11853191 | rs11864188 | rs1187415  | rs11886864 |
| rs118038583 | rs11810571  | rs11819344  | rs11838776 | rs11853250 | rs11864332 | rs11874191 | rs11886868 |
| rs118039278 | rs118106744 | rs11819599  | rs11838830 | rs11853312 | rs11864644 | rs11874381 | rs11887188 |
| rs118039499 | rs118107419 | rs11819995  | rs11838918 | rs11853359 | rs11864750 | rs11874392 | rs11887205 |
| rs118040169 | rs11810751  | rs1182      | rs1183910  | rs11853760 | rs11864839 | rs11874716 | rs11887339 |
| rs11804386  | rs118111862 | rs11820019  | rs11839227 | rs11853991 | rs11864909 | rs11875132 | rs11887431 |
| rs11804556  | rs11811226  | rs11820062  | rs11839271 | rs11854087 | rs11864973 | rs11875240 | rs11887534 |
| rs118046355 | rs118113038 | rs11820132  | rs11839354 | rs11854121 | rs11865049 | rs11875397 | rs11887562 |
| rs118047999 | rs11811522  | rs118202    | rs11839824 | rs11854180 | rs11865256 | rs11875687 | rs11888023 |
| rs11805303  | rs118115924 | rs11820337  | rs11840168 | rs11854210 | rs11865690 | rs11876341 | rs11888201 |
| rs118053310 | rs11811856  | rs11820504  | rs11840502 | rs11854289 | rs11866003 | rs11876432 | rs11888281 |
| rs11805970  | rs11811982  | rs11820589  | rs11840815 | rs11854322 | rs11866031 | rs11876492 | rs11888459 |
| rs11805972  | rs118121072 | rs11820646  | rs11840862 | rs11854390 | rs11866219 | rs11876620 | rs11888485 |
| rs11806180  | rs118122709 | rs1182143   | rs1184089  | rs11854689 | rs11866328 | rs11876749 | rs11889341 |
| rs11806197  | rs11812395  | rs1182180   | rs11841272 | rs11854764 | rs11866581 | rs11876796 | rs11889535 |
| rs11806316  | rs11812460  | rs1182182   | rs11841319 | rs11855017 | rs11866815 | rs11877152 | rs11889814 |
| rs118064296 | rs118124843 | rs1182183   | rs11841589 | rs11855019 | rs1186699  | rs11877350 | rs11890065 |
| rs118065692 | rs118126621 | rs1182188   | rs11841646 | rs11855112 | rs11867022 | rs11877496 | rs11890077 |
| rs11806638  | rs118129027 | rs1182196   | rs11841876 | rs11855195 | rs11867039 | rs1187769  | rs11890390 |

|            |            |            |             |            |             |            |             |
|------------|------------|------------|-------------|------------|-------------|------------|-------------|
| rs11891181 | rs11903787 | rs11919691 | rs11931598  | rs11951031 | rs11968258  | rs11990607 | rs1201929   |
| rs11891215 | rs11903847 | rs11919835 | rs11931711  | rs11951068 | rs11968400  | rs11990963 | rs12019957  |
| rs11891311 | rs11904127 | rs11919880 | rs11931941  | rs11951093 | rs11969064  | rs1199103  | rs120208537 |
| rs11891864 | rs11904490 | rs11920090 | rs11932176  | rs11951673 | rs11969476  | rs11991231 | 3           |
| rs11892043 | rs1190452  | rs11920280 | rs1193237   | rs11951885 | rs11969918  | rs1199156  | rs12021809  |
| rs11892323 | rs11904541 | rs11920354 | rs11932518  | rs11952102 | rs11969985  | rs11992162 | rs12021820  |
| rs11892371 | rs1190458  | rs11920441 | rs11932923  | rs11952124 | rs11970030  | rs11992182 | rs12021948  |
| rs11892759 | rs1190463  | rs11920570 | rs11932971  | rs1195215  | rs11970286  | rs11992186 | rs12022461  |
| rs11893030 | rs11905250 | rs11920657 | rs11933087  | rs1195218  | rs11970475  | rs11992444 | rs12022666  |
| rs11893063 | rs11905359 | rs11921117 | rs11933090  | rs11952673 | rs11970772  | rs11992725 | rs12022684  |
| rs11893307 | rs1190545  | rs11921432 | rs11933531  | rs11952819 | rs11971041  | rs11993089 | rs12022778  |
| rs11893331 | rs11905479 | rs11921457 | rs11933540  | rs11952939 | rs11971098  | rs11993146 | rs12022930  |
| rs11893432 | rs1190552  | rs11921493 | rs11933652  | rs11953095 | rs11971186  | rs11993233 | rs1202309   |
| rs11893623 | rs1190569  | rs11921590 | rs11933823  | rs1195358  | rs11971750  | rs1199333  | rs12023231  |
| rs11893688 | rs11906768 | rs11921666 | rs11934234  | rs11953595 | rs11972595  | rs1199334  | rs12023347  |
| rs1189402  | rs11906968 | rs11921985 | rs11934731  | rs11953630 | rs11972637  | rs1199350  | rs12023657  |
| rs11894081 | rs11907011 | rs11922368 | rs11934833  | rs11953891 | rs11972846  | rs11993596 | rs12023742  |
| rs11894252 | rs1190736  | rs11922794 | rs11935767  | rs11953990 | rs11973318  | rs11993814 | rs12023775  |
| rs11894344 | rs11907546 | rs11923305 | rs11935978  | rs11954020 | rs11973616  | rs11993898 | rs12023811  |
| rs11894371 | rs11908097 | rs11923603 | rs11936340  | rs11954023 | rs11973801  | rs11994255 | rs12023876  |
| rs11894424 | rs1190982  | rs11923657 | rs11936476  | rs11954099 | rs11974139  | rs11994699 | rs12023953  |
| rs11894489 | rs11910328 | rs11923667 | rs11937249  | rs11954639 | rs11974227  | rs11994858 | rs12024115  |
| rs11895026 | rs11910985 | rs11924032 | rs11937496  | rs11954649 | rs11974286  | rs11995369 | rs12024366  |
| rs11895262 | rs11911137 | rs1192404  | rs11937741  | rs11954861 | rs11974702  | rs11995572 | rs12024377  |
| rs11895277 | rs11911275 | rs1192414  | rs11938276  | rs11954893 | rs11974777  | rs11995702 | rs12024492  |
| rs1189553  | rs11911615 | rs1192415  | rs11938641  | rs11955347 | rs11975     | rs11995704 | rs12024554  |
| rs11895564 | rs11911661 | rs1192419  | rs11938745  | rs11955398 | rs11975615  | rs11995824 | rs12024620  |
| rs11895698 | rs11911765 | rs11924265 | rs11938781  | rs11955417 | rs11976020  | rs11995866 | rs12025393  |
| rs11895772 | rs11911974 | rs11924337 | rs11939702  | rs11956282 | rs11976084  | rs11997161 | rs12025621  |
| rs11895863 | rs11912350 | rs11924390 | rs11940147  | rs11956866 | rs11976181  | rs11997238 | rs12025777  |
| rs11896289 | rs11912649 | rs11924792 | rs11940255  | rs11957129 | rs11977187  | rs11997261 | rs12025991  |
| rs11896555 | rs11913426 | rs11925138 | rs11940694  | rs11957276 | rs11977339  | rs11997538 | rs12026245  |
| rs11896635 | rs11913442 | rs11925227 | rs11940733  | rs11957503 | rs11977526  | rs11997631 | rs12026498  |
| rs11896887 | rs11913445 | rs11925247 | rs11940813  | rs11957761 | rs11977670  | rs11997721 | rs12026768  |
| rs11897119 | rs11914001 | rs11925699 | rs11941335  | rs11957829 | rs11977916  | rs11998023 | rs12026918  |
| rs11897252 | rs11914048 | rs11925835 | rs11942731  | rs11957885 | rs11978267  | rs11998763 | rs12027110  |
| rs11897383 | rs11914181 | rs11926459 | rs11943276  | rs11957969 | rs11979158  | rs11999669 | rs12027135  |
| rs11898161 | rs11914389 | rs11926494 | rs11943397  | rs11958102 | rs11979341  | rs11999938 | rs12027702  |
| rs11898293 | rs11914869 | rs11926572 | rs11943511  | rs11958187 | rs11980379  | rs12000047 | rs12027747  |
| rs11898362 | rs11915082 | rs11926659 | rs11943536  | rs11958779 | rs11980456  | rs12000236 | rs12027943  |
| rs11898505 | rs11915143 | rs11926707 | rs11943548  | rs11959928 | rs11981179  | rs12000252 | rs12027999  |
| rs11899121 | rs11915331 | rs11926768 | rs11943905  | rs11960210 | rs11981543  | rs12000113 | rs12028010  |
| rs11899404 | rs11915371 | rs1192691  | rs11944404  | rs11960511 | rs11981911  | rs1200114  | rs12028229  |
| rs11899425 | rs11915402 | rs11927381 | rs11944491  | rs11960649 | rs11982256  | rs12001208 | rs12028339  |
| rs11899888 | rs11915462 | rs11927405 | rs11945101  | rs11961190 | rs11983722  | rs12001221 | rs12028465  |
| rs11900075 | rs11915472 | rs11927597 | rs11945232  | rs11961675 | rs11983987  | rs1200130  | rs12028814  |
| rs11900482 | rs1191551  | rs11927941 | rs11945562  | rs11961755 | rs11984041  | rs12001437 | rs12028817  |
| rs11900673 | rs11915606 | rs11928162 | rs1194592   | rs11961815 | rs11984438  | rs12001634 | rs12028838  |
| rs11900720 | rs11915629 | rs1192824  | rs1194606   | rs11961833 | rs11984462  | rs12001675 | rs12028979  |
| rs11900786 | rs11915634 | rs11928508 | rs1194614   | rs11961980 | rs11984636  | rs12003361 | rs12029076  |
| rs11900963 | rs11915747 | rs11928535 | rs11946205  | rs11962130 | rs11985603  | rs12003835 | rs12029080  |
| rs11900971 | rs11915851 | rs11928547 | rs11946517  | rs11962974 | rs1198575   | rs1200385  | rs12029134  |
| rs11901428 | rs11915970 | rs11928736 | rs1194673   | rs11963621 | rs1198588   | rs1200399  | rs12029229  |
| rs11901649 | rs1191600  | rs11928769 | rs119468010 | rs11963955 | rs1198589   | rs12004    | rs12029262  |
| rs11901793 | rs11916082 | rs11928797 | rs1194708   | rs11964178 | rs11986122  | rs12005151 | rs12029454  |
| rs11901929 | rs11916134 | rs11929092 | rs11947277  | rs11964504 | rs11986220  | rs12005199 | rs12029493  |
| rs11902166 | rs11916411 | rs1192922  | rs11947381  | rs11964516 | rs11986274  | rs12006296 | rs12029562  |
| rs11902236 | rs11916906 | rs1192925  | rs11948261  | rs11965257 | rs11986533  | rs12006440 | rs12029695  |
| rs1190234  | rs11917431 | rs11929291 | rs11948445  | rs11965885 | rs11987974  | rs12008279 | rs12029988  |
| rs11902417 | rs11917483 | rs11929640 | rs11948639  | rs11966072 | rs119880755 | rs12009217 | rs12030183  |
| rs11902527 | rs11917678 | rs1193     | rs11948770  | rs11966200 | 4           | rs12010175 | rs12030196  |
| rs11903152 | rs11917701 | rs11930058 | rs11949100  | rs11966931 | rs11988076  | rs1201113  | rs1203039   |
| rs1190335  | rs11917871 | rs11930385 | rs11949844  | rs11967262 | rs11988286  | rs12012896 | rs12030482  |
| rs11903391 | rs11918092 | rs1193069  | rs11950533  | rs1196760  | rs11989430  | rs12014762 | rs12030576  |
| rs11903480 | rs11918217 | rs11930943 | rs11950562  | rs11967684 | rs11989744  | rs12016871 | rs12030598  |
| rs11903494 | rs11918240 | rs11931074 | rs11950815  | rs11967850 | rs11989898  | rs12018053 | rs12030690  |
| rs11903757 | rs11919484 | rs11931572 | rs11950938  | rs11967891 | rs11990063  | rs12019136 | rs12030712  |

|            |            |             |            |            |            |            |            |
|------------|------------|-------------|------------|------------|------------|------------|------------|
| rs12030991 | rs12041852 | rs12051906  | rs12069782 | rs12088882 | rs12110721 | rs12123537 | rs12131072 |
| rs12031054 | rs12042107 | rs12051987  | rs12070150 | rs12088990 | rs12111032 | rs12123821 | rs12131108 |
| rs1203109  | rs12042197 | rs12052201  | rs12070203 | rs12089658 | rs12112077 | rs12123922 | rs12131134 |
| rs12031188 | rs12042302 | rs12052206  | rs12070337 | rs12089815 | rs12112262 | rs12124078 | rs12131588 |
| rs1203119  | rs12042319 | rs12052410  | rs12071510 | rs1208984  | rs12112380 | rs12124126 | rs12131636 |
| rs12031518 | rs12042908 | rs12052479  | rs12071912 | rs12090181 | rs12112607 | rs12124234 | rs12131796 |
| rs12031634 | rs12042924 | rs12052539  | rs12072199 | rs12090194 | rs12112638 | rs12124281 | rs12131864 |
| rs12031875 | rs12042938 | rs12052715  | rs12072205 | rs12090714 | rs12113288 | rs12124523 | rs12132088 |
| rs12031946 | rs12042959 | rs12052761  | rs12072311 | rs12090849 | rs12113634 | rs12124533 | rs12132168 |
| rs1203233  | rs12042978 | rs12052908  | rs12072739 | rs12091730 | rs1211375  | rs12124727 | rs12132193 |
| rs12032393 | rs12043260 | rs12053049  | rs12073028 | rs12092641 | rs1211377  | rs12124851 | rs12132349 |
| rs12032422 | rs120434   | rs12053091  | rs12073294 | rs12092768 | rs12114218 | rs12125200 | rs12132412 |
| rs12032643 | rs12043569 | rs12053372  | rs12073420 | rs12092768 | rs12114596 | rs12125200 | rs12132412 |
| rs12032649 | rs12043801 | rs12053868  | rs12073436 | rs12093443 | rs12114596 | rs12125335 | rs12132451 |
| rs12032672 | rs12043841 | rs12053870  | rs12073845 | rs12093576 | rs12115640 | rs12125471 | rs12132598 |
| rs12032969 | rs12044012 | rs12053903  | rs12074166 | rs12093699 | rs12115650 | rs12125543 | rs12132692 |
| rs12032996 | rs12044095 | rs12053903- | rs12074166 | rs12093778 | rs12115663 | rs12125691 | rs12132919 |
| rs12033187 | rs12044149 | C           | rs12074324 | rs1209384  | rs12116637 | rs12125786 | rs12133063 |
| rs12033257 | rs12044156 | rs12054166  | rs12074373 | rs1209413  | rs12116643 | rs12125882 | rs12133576 |
| rs12033311 | rs12044597 | rs12054451  | rs12074528 | rs12094497 | rs12116645 | rs12125942 | rs12133604 |
| rs12033835 | rs12044944 | rs12054750  | rs12074821 | rs1209523  | rs12116935 | rs12125947 | rs12133641 |
| rs12034088 | rs12044963 | rs12054895  | rs12075    | rs12096239 | rs12117480 | rs12126043 | rs12133753 |
| rs12034218 | rs12045101 | rs12054895  | rs12075079 | rs12096438 | rs12117603 | rs12126142 | rs12133860 |
| rs12034319 | rs12045227 | rs12055046  | rs12075255 | rs1209731  | rs12117661 | rs12126231 | rs12134133 |
| rs12034342 | rs12045227 | rs12055151  | rs12076366 | rs12097329 | rs12117826 | rs12126292 | rs12134151 |
| rs12034342 | rs12045356 | rs12055234  | rs12076373 | rs12097329 | rs12117826 | rs12126292 | rs12134151 |
| rs12034347 | rs12045440 | rs12055234  | rs12076373 | rs12097390 | rs12117927 | rs1212642  | rs12134279 |
| rs12034383 | rs12045440 | rs12055409  | rs12076549 | rs12097415 | rs12118238 | rs12126607 | rs12134456 |
| rs12034421 | rs1204552  | rs12055445  | rs12076635 | rs12097596 | rs12118280 | rs12126655 | rs12134493 |
| rs12034598 | rs12045879 | rs12055786  | rs12076771 | rs12097784 | rs12118297 | rs12127002 | rs12134534 |
| rs12034786 | rs12045893 | rs1205593   | rs12076788 | rs12097821 | rs12118303 | rs12127002 | rs12134663 |
| rs12035012 | rs12046278 | rs12055996  | rs12076930 | rs12098132 | rs12118339 | rs12127020 | rs12134854 |
| rs12035565 | rs12046369 | rs12056034  | rs12077210 | rs12098284 | rs12118370 | rs12127195 | rs12135035 |
| rs12035622 | rs12046503 | rs12056338  | rs12077265 | rs12098284 | rs12118370 | rs12127195 | rs12135035 |
| rs12035622 | rs12046534 | rs12056626  | rs12077761 | rs12099358 | rs12118443 | rs12127377 | rs12135062 |
| rs12035750 | rs1204656  | rs12056626  | rs12077761 | rs12100034 | rs12118913 | rs12127588 | rs12135200 |
| rs12036340 | rs12046746 | rs12056768  | rs1207782  | rs12100649 | rs12118928 | rs12127701 | rs12135380 |
| rs12036565 | rs12046746 | rs12057031  | rs12078075 | rs12100668 | rs12119    | rs12127789 | rs12135478 |
| rs12037222 | rs12046867 | rs12058002  | rs12078100 | rs12101183 | rs12119128 | rs12127821 | rs12135881 |
| rs12037261 | rs12047028 | rs1205896   | rs12078363 | rs12101261 | rs12119149 | rs12127928 | rs12135894 |
| rs12037261 | rs1204707  | rs12059495  | rs12078697 | rs12101393 | rs12119179 | rs12127965 | rs12135940 |
| rs12037376 | rs1204708  | rs12059546  | rs12079353 | rs12101393 | rs12119179 | rs12127965 | rs12135940 |
| rs12037659 | rs12047212 | rs12059546  | rs12079353 | rs12101597 | rs12119450 | rs12128108 | rs12136031 |
| rs12037669 | rs12047226 | rs12059956  | rs12079745 | rs12101597 | rs12119450 | rs12128108 | rs12136031 |
| rs12037805 | rs12047226 | rs12059956  | rs12079745 | rs12101888 | rs12119667 | rs12128198 | rs12136083 |
| rs12037861 | rs12047253 | rs12060527  | rs12080074 | rs12101888 | rs12119667 | rs12128198 | rs12136083 |
| rs12037905 | rs12047253 | rs12060527  | rs12080074 | rs12102112 | rs12119849 | rs12128213 | rs12136092 |
| rs12037905 | rs12047563 | rs12060706  | rs12080583 | rs12102112 | rs12119849 | rs12128213 | rs12136092 |
| rs12037987 | rs12047910 | rs1206133   | rs12080886 | rs12102677 | rs12119865 | rs12128261 | rs12136148 |
| rs12038019 | rs12048049 | rs12061601  | rs12081070 | rs12102860 | rs12119893 | rs12128356 | rs12136414 |
| rs12038019 | rs12048493 | rs12061708  | rs12081179 | rs12103    | rs12120070 | rs12128526 | rs12136498 |
| rs12038204 | rs12048582 | rs12061708  | rs12081179 | rs12103229 | rs12120143 | rs12128707 | rs12136600 |
| rs1203833  | rs12048704 | rs12062605  | rs12081541 | rs12104221 | rs12120466 | rs12128766 | rs12136793 |
| rs12038333 | rs12048727 | rs12062871  | rs12082628 | rs12104221 | rs12120466 | rs12128766 | rs12136793 |
| rs1203876  | rs12048743 | rs12063247  | rs12083184 | rs12104272 | rs12120558 | rs12128881 | rs12136856 |
| rs12038888 | rs12048904 | rs12063313  | rs12083196 | rs12104672 | rs12120956 | rs12128945 | rs12136922 |
| rs12039075 | rs12049202 | rs12063313  | rs12083196 | rs12104955 | rs12121180 | rs12129003 | rs12136952 |
| rs1203936  | rs12050260 | rs12064109  | rs12083518 | rs12105411 | rs12121236 | rs12129037 | rs12136973 |
| rs12039431 | rs12050359 | rs12065238  | rs12083537 | rs12105411 | rs12121236 | rs12129037 | rs12136973 |
| rs1203949  | rs12050494 | rs12065331  | rs12083692 | rs12105482 | rs12121387 | rs12129500 | rs12137025 |
| rs12039739 | rs12050628 | rs12065533  | rs12083887 | rs12105701 | rs12121609 | rs12129573 | rs12137231 |
| rs12040029 | rs12050759 | rs12065553  | rs12083887 | rs12105729 | rs12121863 | rs12129649 | rs12137294 |
| rs12040264 | rs12050884 | rs12065585  | rs12083902 | rs12105918 | rs12121950 | rs12129705 | rs12137398 |
| rs12040340 | rs12051    | rs12065624  | rs12083902 | rs12106193 | rs12122060 | rs12129787 | rs12137438 |
| rs12040629 | rs12051124 | rs12066343  | rs12085435 | rs12106274 | rs12122168 | rs12129861 | rs12137465 |
| rs1204083  | rs12051245 | rs12066944  | rs12086130 | rs12107178 | rs12122341 | rs12129889 | rs12137505 |
| rs12040949 | rs12051272 | rs1206751   | rs12086750 | rs12107377 | rs12122584 | rs12129938 | rs12137699 |
| rs12041233 | rs12051443 | rs1206755   | rs12087340 | rs12107379 | rs12122629 | rs12130219 | rs12137699 |
| rs12041243 | rs12051519 | rs12068123  | rs12087575 | rs12108275 | rs12122664 | rs12130298 | rs12137733 |
| rs12041331 | rs12051548 | rs1206825   | rs12087680 | rs12108275 | rs12122664 | rs12130298 | rs12137733 |
| rs12041410 | rs12051698 | rs1206825   | rs12087680 | rs12108623 | rs12122803 | rs12130333 | rs12137833 |
| rs12041600 | rs12051781 | rs12068304  | rs12088284 | rs12108623 | rs12122803 | rs12130333 | rs12137833 |
|            |            | rs12068500  | rs12088448 | rs12109081 | rs12123086 | rs12130426 | rs12137936 |
|            |            | rs12068671  | rs12088448 | rs12109247 | rs12123182 | rs1213048  | rs12138046 |
|            |            | rs12068753  | rs12088543 | rs12109548 | rs12123237 | rs12130660 | rs12138127 |
|            |            | rs12069217  | rs12088601 | rs12110    | rs12123293 | rs12130762 | rs12138136 |
|            |            | rs12069733  | rs12088739 | rs12110303 | rs12123298 | rs12130857 | rs12138486 |
|            |            |             | rs12088813 | rs12110693 | rs12123387 | rs12131063 | rs12138574 |

|              |            |            |             |            |            |            |            |
|--------------|------------|------------|-------------|------------|------------|------------|------------|
| rs12138803   | rs12145183 | rs12151248 | rs1217403   | rs12193102 | rs12202536 | rs12210560 | rs1222216  |
| rs12138917   | rs12145291 | rs12151289 | rs12175475  | rs12193281 | rs12202641 | rs12210733 | rs12222197 |
| rs12138950   | rs12145743 | rs12151613 | rs12183587  | rs12193307 | rs12202969 | rs12210810 | rs12222235 |
| rs12139208   | rs12145922 | rs12151621 | rs12184466  | rs12193446 | rs12203098 | rs12210904 | rs12222526 |
| rs12139351   | rs1214598  | rs12151653 | rs12185233  | rs12193797 | rs12203103 | rs12210905 | rs12223381 |
| rs12139650   | rs12146565 | rs12151862 | rs12185242  | rs12193842 | rs12203179 | rs12211124 | rs12223565 |
| rs12139672   | rs12146566 | rs12152266 | rs12185268  | rs12194000 | rs12203240 | rs12211126 | rs12223803 |
| rs12139692   | rs12146618 | rs12152276 | rs12185519  | rs12194148 | rs12203592 | rs12211228 | rs12223916 |
| rs12139775   | rs12146644 | rs12152370 | rs12185569  | rs12194182 | rs12203760 | rs12211410 | rs12223972 |
| rs12140153   | rs12146713 | rs12152463 | rs12185644  | rs12194247 | rs12204009 | rs1221148  | rs12224170 |
| rs12140275   | rs12146727 | rs12153091 | rs12185725  | rs12194408 | rs12204273 | rs12211582 | rs12224337 |
| rs12140402   | rs12146733 | rs12153248 | rs12185734  | rs12194592 | rs12204413 | rs12211604 | rs12225051 |
| rs12140485   | rs12146804 | rs12153391 | rs1218582   | rs1219460  | rs12204488 | rs12211825 | rs12225068 |
| rs12140498   | rs12147136 | rs12153395 | rs12185822  | rs12194642 | rs12204518 | rs12212034 | rs12225230 |
| rs12140637   | rs12147246 | rs12153596 | rs12185851  | rs12194820 | rs12204590 | rs12212049 | rs12225399 |
| rs12140703   | rs12147342 | rs12153819 | rs12186148  | rs12195114 | rs12204701 | rs12212092 | rs12225683 |
| rs12140898   | rs12147505 | rs12153855 | rs12186244  | rs12195240 | rs12204990 | rs12212193 | rs12225799 |
| rs12141041   | rs12147575 | rs12154055 | rs12186509  | rs12195276 | rs12205083 | rs12212535 | rs12226402 |
| rs12141189   | rs1214759  | rs12154082 | rs12186577  | rs12195582 | rs12205199 | rs12212816 | rs12226697 |
| rs12141365   | rs12147596 | rs12154429 | rs12186662  | rs12195792 | rs12205363 | rs12212870 | rs12226877 |
| rs12141375   | rs1214761  | rs12154446 | rs12186798  | rs12196049 | rs12205405 | rs12213021 | rs12227162 |
| rs12141569   | rs12147642 | rs12154498 | rs12187066  | rs12196123 | rs12205538 | rs12213061 | rs12227529 |
| rs12141575   | rs12147818 | rs12154502 | rs12187112  | rs12196128 | rs12205794 | rs12213392 | rs12228756 |
| rs12141660   | rs12147845 | rs1215461  | rs12187443  | rs12196172 | rs12206087 | rs12213431 | rs1222926  |
| rs12141791   | rs12147852 | rs12154627 | rs12187734  | rs12196306 | rs12206094 | rs12213441 | rs12229372 |
| rs12142017   | rs12147883 | rs1215465  | rs12187824  | rs1219648  | rs12206253 | rs12213612 | rs12229654 |
| rs12142070   | rs12147950 | rs1215468  | rs12187898  | rs12196629 | rs12206316 | rs12213680 | rs12229663 |
| rs12142086   | rs12148    | rs1215469  | rs1218822   | rs12196724 | rs12206376 | rs12213996 | rs12229892 |
| rs12142143   | rs12148050 | rs12154695 | rs1218829   | rs12196740 | rs12206488 | rs12214131 | rs12229918 |
| rs12142193   | rs12148209 | rs12155038 | rs12188300  | rs12196849 | rs12206494 | rs12214204 | rs12230074 |
| rs12142240   | rs12148337 | rs12155039 | rs12188351  | rs12196873 | rs12206516 | rs12214483 | rs12230172 |
| rs12142280   | rs12148399 | rs12155172 | rs12188904  | rs12196896 | rs12206564 | rs12214497 | rs12230367 |
| rs12142296   | rs12148425 | rs12155745 | rs12188917  | rs12197025 | rs12206610 | rs12214617 | rs12230886 |
| rs12142379   | rs12148652 | rs12155874 | rs12188937  | rs12197047 | rs12206662 | rs12214623 | rs1223090  |
| rs12142416   | rs12148769 | rs12156009 | rs12188947  | rs12197100 | rs12206717 | rs12214804 | rs1223117  |
| rs12142474   | rs12148780 | rs12156017 | rs12189146  | rs12197246 | rs12206814 | rs12215015 | rs12231235 |
| rs12142635   | rs12149163 | rs12156243 | rs12189178  | rs12197257 | rs12206890 | rs1221502  | rs12231625 |
| rs12142680   | rs12149363 | rs12156392 | rs12189362  | rs12197264 | rs12207082 | rs12215241 | rs12231737 |
| rs12142815   | rs12149527 | rs1215759  | rs12189452  | rs12197384 | rs12207180 | rs12215332 | rs12231744 |
| rs12143094   | rs12149545 | rs12157998 | rs12189608  | rs12197416 | rs12207325 | rs12215602 | rs12232003 |
| rs12143151   | rs12149608 | rs12158292 | rs12189679  | rs12197818 | rs12207399 | rs12215796 | rs12232375 |
| rs12143237   | rs12149643 | rs1215848  | rs12190067  | rs12197912 | rs12207675 | rs12215808 | rs12232384 |
| rs12143541   | rs12149660 | rs1215886  | rs12190287  | rs12198986 | rs1220779  | rs12215920 | rs12232460 |
| rs12143789   | rs12149673 | rs1216006  | rs12190426  | rs12199003 | rs1220789  | rs1221638  | rs12232497 |
| rs12143791   | rs12149695 | rs12162090 | rs12190495  | rs12199083 | rs12207974 | rs12216497 | rs12232680 |
| rs12143842   | rs12149704 | rs12162221 | rs12190758  | rs12199215 | rs12207986 | rs12216812 | rs12232685 |
| rs12143842-T | rs12149828 | rs12162782 | rs12190777  | rs12199223 | rs12208017 | rs12216886 | rs12232804 |
| rs12143966   | rs12149832 | rs12163971 | rs121907892 | rs12199246 | rs12208103 | rs12216891 | rs1223397  |
| rs12144044   | rs12149862 | rs12164905 | rs121908120 | rs12199720 | rs12208105 | rs12216896 | rs12234108 |
| rs12144049   | rs1215     | rs12165    | rs121908872 | rs12199775 | rs12208192 | rs12217006 | rs12234369 |
| rs12144063   | rs12150045 | rs12165276 | rs12191082  | rs12200266 | rs12208357 | rs12217769 | rs12234576 |
| rs12144094   | rs12150229 | rs12165508 | rs12191243  | rs1220027  | rs12208493 | rs12218358 | rs12235002 |
| rs12144133   | rs12150253 | rs12167144 | rs121912648 | rs12200388 | rs12208753 | rs12218858 | rs12235468 |
| rs12144138   | rs12150263 | rs12167679 | rs121913059 | rs12200498 | rs12208772 | rs12219125 | rs1223585  |
| rs12144319   | rs12150284 | rs12170228 | rs12191307  | rs12201149 | rs12208785 | rs12219246 | rs12236195 |
| rs12144335   | rs12150327 | rs12170305 | rs12191504  | rs1220128  | rs12208834 | rs12219304 | rs12236219 |
| rs12144506   | rs12150495 | rs12170452 | rs121918007 | rs12201437 | rs12208899 | rs12219514 | rs12236727 |
| rs12144610   | rs12150660 | rs1217091  | rs121918019 | rs12201676 | rs12209106 | rs1221976  | rs12236788 |
| rs12144626   | rs12150665 | rs1217105  | rs121918166 | rs12201698 | rs12209223 | rs1221983  | rs12236871 |
| rs12144640   | rs12150672 | rs1217106  | rs121918167 | rs12201899 | rs12209419 | rs12220375 | rs1223791  |
| rs12144655   | rs12150914 | rs12172023 | rs121918170 | rs12201912 | rs12209477 | rs1222063  | rs12237955 |
| rs1214467    | rs12150978 | rs12172847 | rs12191877  | rs12202017 | rs12209641 | rs12220642 | rs1223796  |
| rs12144907   | rs12151021 | rs12173570 | rs12192123  | rs12202055 | rs12209685 | rs12220777 | rs12237961 |
| rs12145078   | rs12151108 | rs1217362  | rs12192275  | rs12202131 | rs12209838 | rs12221107 | rs12238134 |
| rs12145083   | rs12151113 | rs12173787 | rs12192632  | rs12202204 | rs12209887 | rs12221125 | rs12238336 |
| rs12145171   | rs1215112  | rs1217393  | rs12192672  | rs12202314 | rs12210050 | rs12221133 | rs12238587 |
|              | rs12151152 | rs12173930 | rs12192912  | rs12202350 | rs12210538 | rs12221218 | rs12239046 |

|            |             |            |            |            |            |            |            |
|------------|-------------|------------|------------|------------|------------|------------|------------|
| rs12239179 | rs12263288  | rs12286037 | rs12306007 | rs12326005 | rs12343333 | rs12363232 | rs12376674 |
| rs12239736 | rs12263348  | rs1228632  | rs12306290 | rs1232605  | rs12343705 | rs12363369 | rs1237670  |
| rs12239737 | rs12263369  | rs12286929 | rs1230666  | rs12326164 | rs12343737 | rs12363432 | rs12376738 |
| rs12240508 | rs1226412   | rs12287066 | rs12306790 | rs12326871 | rs12343797 | rs12363520 | rs12376870 |
| rs12240572 | rs1226413   | rs12287076 | rs12308065 | rs12327057 | rs1234413  | rs12363672 | rs12377027 |
| rs12240959 | rs12264186  | rs12287212 | rs12308700 | rs12327213 | rs1234418  | rs12363917 | rs12377175 |
| rs12240999 | rs12264252  | rs12288023 | rs12308909 | rs12328241 | rs1234423  | rs12364060 | rs12377606 |
| rs12241008 | rs12264390  | rs12289095 | rs12309    | rs12328348 | rs12344280 | rs12364080 | rs12377624 |
| rs12241029 | rs12265047  | rs12289262 | rs12309133 | rs12328439 | rs12344396 | rs12364432 | rs12377817 |
| rs12241254 | rs12265655  | rs12289583 | rs12309467 | rs12328637 | rs12344562 | rs12364470 | rs12378015 |
| rs12241416 | rs1226574   | rs12289836 | rs12310246 | rs12328675 | rs12344656 | rs12364489 | rs12378064 |
| rs12241932 | rs12265790  | rs12289961 | rs12310367 | rs12329062 | rs12344818 | rs12364620 | rs12378192 |
| rs12242110 | rs12266014  | rs12290253 | rs12310519 | rs12329366 | rs1234598  | rs12364720 | rs12378344 |
| rs12243075 | rs12266954  | rs12290663 | rs12311848 | rs12330007 | rs12346772 | rs12364753 | rs12378446 |
| rs12243326 | rs12267227  | rs12290699 | rs1231206  | rs12330322 | rs12347137 | rs12364964 | rs12378451 |
| rs12243859 | rs12268753  | rs12290811 | rs1231207  | rs12330631 | rs12347191 | rs12365079 | rs12378543 |
| rs12244388 | rs12270310  | rs1229119  | rs12312487 | rs12330713 | rs12348106 | rs12365160 | rs12378573 |
| rs12245149 | rs12270641  | rs12291662 | rs12312693 | rs12331049 | rs12348423 | rs12365432 | rs12379034 |
| rs12245197 | rs12271161  | rs12291789 | rs12313068 | rs12331051 | rs12348523 | rs12365482 | rs12379291 |
| rs12246027 | rs12271225  | rs12292135 | rs12313279 | rs12331700 | rs12349966 | rs12365699 | rs12379417 |
| rs12246276 | rs12271237  | rs12292724 | rs12313306 | rs12331869 | rs12350582 | rs12366339 | rs12379622 |
| rs12246352 | rs12271931  | rs12292911 | rs1231375  | rs12332674 | rs12350739 | rs12367037 | rs12379667 |
| rs12246635 | rs12271964  | rs12293231 | rs12313762 | rs12332731 | rs123509   | rs12367809 | rs12380216 |
| rs12246842 | rs12272004  | rs12293535 | rs12313790 | rs12333599 | rs12351061 | rs1236816  | rs12380242 |
| rs12247028 | rs12272917  | rs12293670 | rs12313946 | rs12333760 | rs12351112 | rs12368181 | rs12380322 |
| rs1224712  | rs12273007  | rs12293898 | rs12314162 | rs1233393  | rs12351118 | rs12368351 | rs12380816 |
| rs12247163 | rs12273363  | rs12294104 | rs12315434 | rs12334659 | rs12351570 | rs12368376 | rs12380852 |
| rs12247397 | rs12273435  | rs12294259 | rs12316047 | rs12334877 | rs12352785 | rs12368401 | rs12384986 |
| rs12249377 | rs12273892  | rs12294479 | rs12316441 | rs1233491  | rs12352863 | rs12368628 | rs12385720 |
| rs12249410 | rs12274192  | rs12294913 | rs12317176 | rs1233493  | rs12353411 | rs12368653 | rs12386061 |
| rs12250150 | rs12274440  | rs1229492  | rs12317268 | rs1233508  | rs12353541 | rs12368865 | rs12386571 |
| rs1225051  | rs12274865  | rs1229498  | rs12318183 | rs12335424 | rs12354486 | rs12368919 | rs12386849 |
| rs1225052  | rs12274984  | rs12295535 | rs12318272 | rs1233556  | rs12354622 | rs12369033 | rs12390237 |
| rs1225053  | rs12275055  | rs12295636 | rs12318598 | rs1233578  | rs12354821 | rs12369123 | rs12392108 |
| rs1225060  | rs12275127  | rs1229605  | rs123187   | rs1233587  | rs12354914 | rs12369179 | rs12392491 |
| rs12250948 | rs12276130  | rs12296050 | rs12319419 | rs12335914 | rs12355784 | rs12369200 | rs1239259  |
| rs12251016 | rs122767751 | rs12296430 | rs1232027  | rs1233595  | rs12356045 | rs12369214 | rs12393627 |
| rs12251299 | 0           | rs12296477 | rs12320328 | rs12336359 | rs12356193 | rs12369228 | rs12395955 |
| rs12251307 | rs12276991  | rs12296530 | rs12320918 | rs12336441 | rs12356492 | rs123698   | rs1239682  |
| rs12251962 | rs12277152  | rs12296850 | rs12320925 | rs12337458 | rs12356821 | rs12369969 | rs1239704  |
| rs12252384 | rs1227734   | rs12296982 | rs12321    | rs123378   | rs12356830 | rs12370487 | rs1239705  |
| rs12253380 | rs12277563  | rs12297049 | rs12321904 | rs12337928 | rs12357239 | rs12370612 | rs1239706  |
| rs12253527 | rs12278023  | rs12297321 | rs12322111 | rs12338076 | rs12357257 | rs12371    | rs1239945  |
| rs12253981 | rs12278461  | rs12297409 | rs12322862 | rs12338283 | rs12357266 | rs12371778 | rs1239948  |
| rs12254582 | rs12278740  | rs1229762  | rs12323184 | rs12338478 | rs12357321 | rs12371805 | rs12400785 |
| rs12255141 | rs12279202  | rs12298351 | rs12323609 | rs12338491 | rs12357890 | rs12371834 | rs12401456 |
| rs12255439 | rs12279250  | rs12298405 | rs12323717 | rs12338765 | rs12357919 | rs12371967 | rs12401656 |
| rs12255761 | rs1227995   | rs12298484 | rs12324079 | rs12338788 | rs12358258 | rs12372180 | rs12401678 |
| rs12256387 | rs1227996   | rs12298541 | rs12324159 | rs12338959 | rs12358504 | rs12372466 | rs12401738 |
| rs12256438 | rs12280075  | rs12298813 | rs12324441 | rs12339113 | rs12358692 | rs12372718 | rs12402227 |
| rs12256551 | rs1228024   | rs12299509 | rs12324750 | rs1233917  | rs12359272 | rs12373006 | rs12402406 |
| rs12256830 | rs12280388  | rs1229978  | rs1232482  | rs12339348 | rs12359372 | rs12373123 | rs12403425 |
| rs12257323 | rs1228044   | rs1229984  | rs12324931 | rs12339388 | rs12359689 | rs12373124 | rs12403568 |
| rs12257568 | rs12280456  | rs1230003  | rs12325113 | rs12339666 | rs12359711 | rs12373142 | rs12403795 |
| rs12257692 | rs12281009  | rs1230005  | rs12325187 | rs12339911 | rs12360537 | rs12373388 | rs12403957 |
| rs12258400 | rs12282107  | rs12300425 | rs12325192 | rs12340775 | rs12360772 | rs12373536 | rs12403994 |
| rs12258451 | rs12282231  | rs1230097  | rs12325238 | rs12340987 | rs12360799 | rs12373539 | rs12404070 |
| rs12258967 | rs12282785  | rs1230106  | rs12325245 | rs1234122  | rs12360997 | rs12374076 | rs12404086 |
| rs12259338 | rs12283611  | rs12301299 | rs12325266 | rs12341303 | rs12361415 | rs12374077 | rs12404660 |
| rs12259842 | rs12283653  | rs1230148  | rs12325273 | rs12342024 | rs12361586 | rs12374220 | rs12404679 |
| rs12260159 | rs12283755  | rs12302895 | rs12325429 | rs12342106 | rs12361673 | rs12374521 | rs12404954 |
| rs12260436 | rs12284404  | rs12303122 | rs12325489 | rs1234214  | rs12361687 | rs12375196 | rs12405132 |
| rs12261266 | rs12284535  | rs12303699 | rs12325508 | rs12342201 | rs1236176  | rs12375949 | rs12405213 |
| rs12261598 | rs12284933  | rs12304188 | rs12325702 | rs12342421 | rs12362593 | rs12375985 | rs12405515 |
| rs12261843 | rs12285074  | rs12305097 | rs12325727 | rs1234251  | rs12362717 | rs12375999 | rs12405558 |
| rs12262629 | rs12285347  | rs12305809 | rs12325861 | rs12342546 | rs12363019 | rs12376113 | rs12405634 |
| rs12263258 | rs12285584  | rs12305866 | rs12325866 | rs12342831 | rs1236309  | rs12376511 | rs12405726 |



|            |            |            |            |            |            |            |            |
|------------|------------|------------|------------|------------|------------|------------|------------|
| rs12405750 | rs12415920 | rs12427254 | rs12438181 | rs12445804 | rs12452064 | rs12459919 | rs12467104 |
| rs12405761 | rs12416116 | rs12427600 | rs12438326 | rs12445820 | rs1245213  | rs12459943 | rs12467175 |
| rs12405776 | rs12416190 | rs12427622 | rs12438542 | rs12446034 | rs1245214  | rs12459965 | rs12467316 |
| rs12405889 | rs12416288 | rs12427685 | rs12438629 | rs12446238 | rs12452314 | rs12459969 | rs12467464 |
| rs12406019 | rs12416331 | rs12427782 | rs12438659 | rs12446275 | rs12452393 | rs12460070 | rs12467812 |
| rs12406089 | rs12416372 | rs1242780  | rs12438742 | rs12446341 | rs12452440 | rs12460389 | rs12467877 |
| rs12406092 | rs12416687 | rs12427846 | rs12439043 | rs12446487 | rs12452505 | rs12460547 | rs12468021 |
| rs12406370 | rs12416741 | rs12428588 | rs12439200 | rs12446492 | rs12452576 | rs12460587 | rs12468040 |
| rs12406439 | rs12416821 | rs12428625 | rs12439212 | rs12446515 | rs12452590 | rs12460849 | rs12468070 |
| rs12406517 | rs12416941 | rs12428857 | rs12439240 | rs12446550 | rs12452789 | rs12460876 | rs12469063 |
| rs12406643 | rs12417519 | rs12428878 | rs12439619 | rs12446554 | rs12452797 | rs12461065 | rs12469284 |
| rs12406721 | rs12417556 | rs12428889 | rs12439798 | rs12446589 | rs12453    | rs12461110 | rs12469306 |
| rs1240697  | rs12417665 | rs12429545 | rs12439829 | rs12446632 | rs12453010 | rs12461144 | rs12469459 |
| rs12407028 | rs12418451 | rs12429765 | rs12440014 | rs12447180 | rs12453125 | rs12461480 | rs1246946  |
| rs1240716  | rs12418559 | rs12429889 | rs12440045 | rs12447206 | rs12453394 | rs12461821 | rs12469628 |
| rs12407717 | rs12418575 | rs1242990  | rs12440086 | rs12447690 | rs12453507 | rs12461856 | rs12469667 |
| rs12408022 | rs12418744 | rs12430303 | rs12440111 | rs12447718 | rs12453576 | rs12461874 | rs12469758 |
| rs1240820  | rs12418948 | rs12430764 | rs12440160 | rs12447804 | rs12453682 | rs12461964 | rs12469973 |
| rs12408576 | rs12419064 | rs12431244 | rs12440605 | rs12447809 | rs12453732 | rs12462111 | rs12470032 |
| rs12408663 | rs12419342 | rs12431415 | rs12440667 | rs12447992 | rs12453988 | rs12462305 | rs12470059 |
| rs12408694 | rs12419690 | rs12431682 | rs12440695 | rs12448028 | rs12454003 | rs12462380 | rs12470439 |
| rs12408934 | rs12419995 | rs1243179  | rs12440800 | rs12448211 | rs12454204 | rs12462428 | rs12470505 |
| rs12408941 | rs12420205 | rs1243180  | rs12440803 | rs12448257 | rs12454487 | rs12462554 | rs12470698 |
| rs12408981 | rs12420422 | rs12431811 | rs12440869 | rs12448368 | rs12454640 | rs1246264  | rs12470864 |
| rs12408993 | rs12420528 | rs1243182  | rs12441073 | rs12448464 | rs1245465  | rs1246265  | rs12470883 |
| rs12409048 | rs12420744 | rs1243188  | rs12441088 | rs12448482 | rs12454712 | rs12462702 | rs12470914 |
| rs12409365 | rs12421148 | rs1243191  | rs12441129 | rs12448528 | rs12454829 | rs12462826 | rs12470949 |
| rs12409479 | rs12421382 | rs12432093 | rs12441130 | rs1244869  | rs12454835 | rs12462959 | rs12470967 |
| rs12409639 | rs12421941 | rs12432176 | rs12441227 | rs12448756 | rs1245485  | rs12462975 | rs12470971 |
| rs12409804 | rs1242198  | rs12432253 | rs12441354 | rs12448902 | rs12454989 | rs12463    | rs12470989 |
| rs12409929 | rs12421995 | rs12432434 | rs12441426 | rs12449066 | rs12455069 | rs12463001 | rs12471183 |
| rs12410063 | rs12422125 | rs12432676 | rs12441495 | rs12449097 | rs1245540  | rs12463212 | rs1247121  |
| rs12410155 | rs12422544 | rs12432697 | rs12441543 | rs12449170 | rs1245547  | rs12463278 | rs12471433 |
| rs12410168 | rs12422552 | rs12432904 | rs12441765 | rs12449192 | rs1245582  | rs12463617 | rs12471554 |
| rs12410239 | rs12422600 | rs12433109 | rs12442008 | rs12449219 | rs12455952 | rs12463645 | rs12471698 |
| rs12410416 | rs12422878 | rs12433335 | rs12442183 | rs12449427 | rs12456222 | rs12463719 | rs12471768 |
| rs12410444 | rs12423247 | rs12433690 | rs12442242 | rs12449442 | rs12456492 | rs12463754 | rs12472089 |
| rs12410532 | rs12423482 | rs12433775 | rs12442330 | rs12449707 | rs12456711 | rs12464355 | rs12472142 |
| rs12411216 | rs12423545 | rs12434023 | rs12442376 | rs12449758 | rs12457128 | rs12464387 | rs12472159 |
| rs12411257 | rs12423664 | rs12434356 | rs12442563 | rs12449792 | rs12457157 | rs12464758 | rs12472274 |
| rs12411277 | rs12423752 | rs12434396 | rs12442649 | rs1244983  | rs12457278 | rs12464832 | rs12472359 |
| rs12411732 | rs12423782 | rs12434433 | rs12442674 | rs12449843 | rs12457342 | rs12465425 | rs12472381 |
| rs12411742 | rs12424086 | rs12434551 | rs12442826 | rs12449852 | rs12457358 | rs12465515 | rs12472555 |
| rs12411809 | rs12424113 | rs12434701 | rs12443170 | rs12449858 | rs12457603 | rs12465526 | rs12472588 |
| rs12411860 | rs12424607 | rs12434998 | rs12443246 | rs12449964 | rs12457812 | rs12465701 | rs12472667 |
| rs12411886 | rs12424620 | rs12435046 | rs12443252 | rs12450017 | rs12457893 | rs12465752 | rs12472790 |
| rs12411959 | rs12424627 | rs12435136 | rs12443279 | rs12450129 | rs12458009 | rs12465778 | rs12472911 |
| rs12412214 | rs1242484  | rs1243572  | rs12443468 | rs12450199 | rs12458015 | rs12465802 | rs12473028 |
| rs12412313 | rs1242490  | rs1243579  | rs12443634 | rs1245035  | rs12458093 | rs12465938 | rs12473635 |
| rs12412959 | rs1242507  | rs12435790 | rs12443745 | rs12450368 | rs12458099 | rs12465974 | rs12473839 |
| rs12413181 | rs1242516  | rs12435797 | rs12443806 | rs12450494 | rs12458127 | rs12466022 | rs12473986 |
| rs12413195 | rs1242518  | rs12435857 | rs12443906 | rs12450577 | rs12458130 | rs12466127 | rs12474050 |
| rs12413409 | rs12425441 | rs12435957 | rs12443928 | rs12450688 | rs1245829  | rs12466146 | rs12474201 |
| rs12413565 | rs12425705 | rs12436    | rs12444040 | rs12450700 | rs12458462 | rs12466227 | rs12474416 |
| rs1241357  | rs12425791 | rs12436039 | rs12444261 | rs12450807 | rs12458491 | rs12466317 | rs12474446 |
| rs12413578 | rs12425835 | rs12436074 | rs12444314 | rs12450841 | rs12458596 | rs12466337 | rs12474507 |
| rs12413624 | rs12425953 | rs12436091 | rs12444539 | rs12450895 | rs12459057 | rs12466434 | rs12474587 |
| rs12413816 | rs12425970 | rs12436555 | rs12444708 | rs1245101  | rs12459174 | rs12466485 | rs12474609 |
| rs12413935 | rs12426113 | rs12436785 | rs1244471  | rs12451109 | rs12459249 | rs12466547 | rs12474669 |
| rs12413946 | rs12426126 | rs12437118 | rs1244475  | rs12451295 | rs12459350 | rs12466604 | rs1247471  |
| rs12414412 | rs12426424 | rs12437151 | rs12444979 | rs12451373 | rs12459368 | rs12466653 | rs12474895 |
| rs12414777 | rs12426511 | rs12437434 | rs12445022 | rs12451471 | rs12459419 | rs12466697 | rs12474906 |
| rs12415148 | rs12426679 | rs12437696 | rs12445050 | rs12451582 | rs12459503 | rs12466865 | rs12475081 |
| rs12415159 | rs12426768 | rs12437714 | rs12445172 | rs12451586 | rs12459507 | rs12466910 | rs12475184 |
| rs12415284 | rs12427047 | rs12437854 | rs12445235 | rs12451715 | rs12459634 | rs12466947 | rs12475467 |
| rs12415421 | rs12427164 | rs12437988 | rs12445547 | rs12451766 | rs12459676 | rs12466950 | rs12475496 |
| rs12415670 | rs12427218 | rs12438177 | rs12445568 | rs12451892 | rs12459847 | rs12467084 | rs12475664 |

|            |            |            |            |            |            |            |            |
|------------|------------|------------|------------|------------|------------|------------|------------|
| rs12475813 | rs12483377 | rs12493607 | rs1250505  | rs12513481 | rs12524795 | rs12534625 | rs12543486 |
| rs12476059 | rs12483853 | rs12493830 | rs12505188 | rs12513616 | rs12524852 | rs12534945 | rs12543555 |
| rs12476132 | rs12483959 | rs12493885 | rs12505328 | rs12513649 | rs12525051 | rs12534970 | rs12543598 |
| rs12476173 | rs12484074 | rs12493901 | rs1250544  | rs12513758 | rs12525220 | rs12535004 | rs12543645 |
| rs12476527 | rs12484232 | rs12494120 | rs1250546  | rs12513896 | rs12525309 | rs12535041 | rs12543725 |
| rs12476693 | rs12484252 | rs12494190 | rs12505498 | rs12514517 | rs12525327 | rs12535226 | rs12543811 |
| rs12476703 | rs12484438 | rs12494304 | rs1250550  | rs12514897 | rs12525417 | rs12535463 | rs1254386  |
| rs12476772 | rs12484466 | rs12494328 | rs1250551  | rs12514956 | rs12525532 | rs12535629 | rs12543924 |
| rs12476923 | rs12484776 | rs12494396 | rs1250552  | rs12515180 | rs12525534 | rs12535854 | rs12544332 |
| rs12477065 | rs12484795 | rs12494424 | rs1250557  | rs12515274 | rs12525668 | rs12536253 | rs12544501 |
| rs12477083 | rs12484809 | rs12494510 | rs1250559  | rs12515392 | rs12526038 | rs12536444 | rs12545053 |
| rs12477088 | rs12484951 | rs12494691 | rs1250562  | rs12515541 | rs12526299 | rs12536500 | rs12545602 |
| rs12477314 | rs12484971 | rs12494693 | rs1250563  | rs12515554 | rs12526453 | rs12536766 | rs12545623 |
| rs12477345 | rs12485003 | rs12494724 | rs1250566  | rs12516070 | rs12526480 | rs1253682  | rs12545733 |
| rs12477385 | rs12485060 | rs12495178 | rs1250567  | rs12516176 | rs12526513 | rs12536836 | rs12545826 |
| rs12477570 | rs12485100 | rs12495674 | rs1250568  | rs12516283 | rs12526675 | rs12537    | rs12545866 |
| rs12477602 | rs12485165 | rs12495832 | rs1250569  | rs12516990 | rs12526696 | rs12537284 | rs12546096 |
| rs1247769  | rs12485168 | rs12496005 | rs1250573  | rs12517140 | rs12527429 | rs12537331 | rs12546327 |
| rs12477810 | rs12485444 | rs12496230 | rs12505942 | rs12517168 | rs12527711 | rs12537376 | rs12546331 |
| rs12477961 | rs12485478 | rs12496412 | rs1250597  | rs12517187 | rs12527712 | rs12537434 | rs12546366 |
| rs12478088 | rs12485738 | rs12496583 | rs1250599  | rs12517200 | rs12528068 | rs12537573 | rs12546399 |
| rs12478119 | rs12485875 | rs12496730 | rs12506122 | rs12517431 | rs12528131 | rs12537870 | rs12546444 |
| rs12478156 | rs12486601 | rs12497115 | rs12506184 | rs12517438 | rs12528656 | rs12538108 | rs12546489 |
| rs12478252 | rs12487131 | rs12497133 | rs12506221 | rs12517876 | rs12528797 | rs12538229 | rs12546755 |
| rs12478285 | rs12487341 | rs12497779 | rs12506688 | rs12518401 | rs12528822 | rs12538407 | rs1254702  |
| rs12478299 | rs12487411 | rs12497850 | rs12506698 | rs12518468 | rs12528886 | rs12538435 | rs12547135 |
| rs12478449 | rs12487626 | rs12498098 | rs12506874 | rs12518552 | rs1252914  | rs12538711 | rs1254725  |
| rs12478529 | rs12487658 | rs12498100 | rs12506899 | rs12518614 | rs12529186 | rs12538763 | rs12547335 |
| rs12478539 | rs12487717 | rs12498742 | rs12507026 | rs12518987 | rs12529361 | rs12538826 | rs1254734  |
| rs12478601 | rs12487736 | rs12499107 | rs12507127 | rs12519073 | rs12529514 | rs12538843 | rs12547406 |
| rs12478916 | rs12487905 | rs12499125 | rs12507197 | rs12519165 | rs12529733 | rs12538988 | rs12547416 |
| rs12478953 | rs12487980 | rs12499182 | rs12507427 | rs12519500 | rs12529766 | rs12539172 | rs12548367 |
| rs12479210 | rs12488237 | rs12499307 | rs12507563 | rs12519613 | rs12529887 | rs1253920  | rs12548560 |
| rs12479238 | rs1248825  | rs12499537 | rs12507628 | rs12519788 | rs1252992  | rs12539264 | rs12548670 |
| rs12479297 | rs12488471 | rs12499685 | rs12507733 | rs12519827 | rs12529923 | rs12539316 | rs12548864 |
| rs12479300 | rs1248855  | rs1250009  | rs12507927 | rs12519859 | rs12530022 | rs12539524 | rs12548874 |
| rs12479355 | rs1248856  | rs12500103 | rs12508714 | rs12520053 | rs12530084 | rs12539707 | rs12548939 |
| rs1247942  | rs1248860  | rs1250023  | rs12508981 | rs12520354 | rs12530388 | rs12539741 | rs1254900  |
| rs1247943  | rs12488721 | rs12500355 | rs12509014 | rs12520489 | rs12530578 | rs12539868 | rs12549025 |
| rs12479469 | rs12489267 | rs12500426 | rs12509218 | rs12520522 | rs12530679 | rs12540011 | rs12549058 |
| rs12479734 | rs12489490 | rs12500531 | rs12509234 | rs12520974 | rs12530709 | rs12540241 | rs12549623 |
| rs12480328 | rs12489590 | rs12500579 | rs12509282 | rs12520984 | rs12530845 | rs12540307 | rs12549761 |
| rs12480408 | rs12489732 | rs12500824 | rs12509311 | rs12521097 | rs12530946 | rs12540388 | rs12549801 |
| rs12480732 | rs12489828 | rs12501032 | rs12509379 | rs12521868 | rs12531458 | rs12540951 | rs12549902 |
| rs1248079  | rs12490036 | rs12501071 | rs12509403 | rs12521993 | rs12531500 | rs12541020 | rs12550199 |
| rs12480824 | rs12490079 | rs1250129  | rs12509485 | rs12522002 | rs12531540 | rs12541121 | rs12550442 |
| rs12481092 | rs12490113 | rs12501332 | rs12509595 | rs12522114 | rs12531645 | rs12541339 | rs12550577 |
| rs12481228 | rs12490148 | rs12501358 | rs12509636 | rs12522289 | rs12531711 | rs12541362 | rs12550612 |
| rs12481262 | rs12490581 | rs12501632 | rs12509976 | rs12522290 | rs12531774 | rs12541381 | rs12550613 |
| rs12481282 | rs1249090  | rs12501884 | rs1251015  | rs12522418 | rs12531804 | rs12541595 | rs12550646 |
| rs12481365 | rs1249096  | rs12502229 | rs12510215 | rs12522465 | rs12531825 | rs12541758 | rs12550650 |
| rs12481408 | rs12491181 | rs1250247  | rs12510382 | rs12522567 | rs12532102 | rs1254194  | rs12550716 |
| rs12481462 | rs12491503 | rs1250248  | rs1251075  | rs12522598 | rs12532143 | rs12542527 | rs12550717 |
| rs12481546 | rs12491785 | rs1250258  | rs12510805 | rs12522670 | rs12532479 | rs1254257  | rs12550729 |
| rs12481572 | rs12491937 | rs1250259  | rs12510916 | rs12522841 | rs12532494 | rs1254276  | rs12551048 |
| rs12481664 | rs12492113 | rs12503491 | rs12511037 | rs12522910 | rs12532625 | rs12542907 | rs12551256 |
| rs12481910 | rs12492180 | rs12503522 | rs12511169 | rs12523094 | rs12533251 | rs1254298  | rs12551834 |
| rs12482088 | rs12492279 | rs12503601 | rs12511230 | rs12523793 | rs12533561 | rs1254299  | rs12551906 |
| rs12482324 | rs12492363 | rs12503643 | rs12511373 | rs12523822 | rs12533568 | rs1254306  | rs12552    |
| rs1248264  | rs1249260  | rs12503971 | rs12511469 | rs12524093 | rs12533596 | rs1254309  | rs1255223  |
| rs12482821 | rs12492784 | rs12504231 | rs12511815 | rs12524110 | rs12534093 | rs1254314  | rs12552288 |
| rs12482831 | rs12492846 | rs12504282 | rs12511880 | rs1252425  | rs12534399 | rs1254319  | rs12552443 |
| rs1248290  | rs12493005 | rs12504628 | rs12511987 | rs12524341 | rs12534421 | rs12543287 | rs12552533 |
| rs12482904 | rs12493107 | rs12504699 | rs12512163 | rs12524378 | rs12534473 | rs12543318 | rs12553064 |
| rs12482947 | rs12493550 | rs12504746 | rs125124   | rs12524487 | rs12534498 | rs1254337  | rs12553324 |
| rs12483051 | rs12493563 | rs12504795 | rs12512883 | rs12524535 | rs12534506 | rs12543430 | rs12554512 |
| rs12483205 | rs12493585 | rs12504954 | rs12513440 | rs12524651 | rs12534570 | rs12543458 | rs12554596 |

|            |            |            |            |            |            |            |            |
|------------|------------|------------|------------|------------|------------|------------|------------|
| rs12554943 | rs12570045 | rs12582170 | rs12595496 | rs12602912 | rs12612750 | rs12621633 | rs1263309  |
| rs12554976 | rs12570134 | rs12582330 | rs12595562 | rs1260294  | rs12612769 | rs12621634 | rs12633090 |
| rs12555241 | rs12570523 | rs12582464 | rs12595786 | rs12602950 | rs12612930 | rs12621844 | rs12633174 |
| rs12555291 | rs12570727 | rs1258267  | rs12596053 | rs12603194 | rs12613243 | rs12622150 | rs12633551 |
| rs12555425 | rs12571093 | rs12583267 | rs12596294 | rs1260326  | rs12613336 | rs1262221  | rs12633613 |
| rs12555870 | rs12571363 | rs12583553 | rs12596466 | rs12603280 | rs12613375 | rs12622667 | rs12633863 |
| rs12555901 | rs12571549 | rs12583637 | rs12596613 | rs1260333  | rs12613485 | rs12622670 | rs1263412  |
| rs12557126 | rs12571664 | rs12583793 | rs12596638 | rs12603355 | rs12613500 | rs12623041 | rs12634152 |
| rs12558081 | rs1257168  | rs12584136 | rs12596920 | rs12603526 | rs12613959 | rs12623165 | rs12634180 |
| rs12558341 | rs1257169  | rs12584323 | rs12597024 | rs12603589 | rs12614    | rs12623170 | rs12634229 |
| rs12558842 | rs12571751 | rs12584892 | rs12597579 | rs1260387  | rs12614091 | rs12623399 | rs12634374 |
| rs1255908  | rs1257192  | rs12584954 | rs12597682 | rs12603885 | rs12614263 | rs12623454 | rs12634709 |
| rs12559140 | rs12572168 | rs12585310 | rs12597975 | rs1260405  | rs12614316 | rs12623456 | rs12634907 |
| rs1256061  | rs1257220  | rs12585794 | rs12598049 | rs12604076 | rs12614369 | rs12623524 | rs12634936 |
| rs12561781 | rs12572486 | rs12585823 | rs12598179 | rs12604546 | rs12614435 | rs12623702 | rs12635066 |
| rs12561869 | rs12572586 | rs12586289 | rs12598357 | rs12604999 | rs12614487 | rs12624244 | rs12635118 |
| rs12561919 | rs12572683 | rs12586317 | rs12598376 | rs12605156 | rs12614491 | rs12624302 | rs12635129 |
| rs12561995 | rs12572775 | rs12586692 | rs12598529 | rs12605642 | rs12614526 | rs12624433 | rs12635303 |
| rs12562037 | rs1257310  | rs12586772 | rs12598569 | rs12605964 | rs12614608 | rs1262476  | rs12635413 |
| rs12562794 | rs12573330 | rs12586987 | rs12598756 | rs1260606  | rs12614829 | rs1262478  | rs12635553 |
| rs1256288  | rs12573695 | rs12587001 | rs12598916 | rs12606230 | rs12614848 | rs12625149 | rs12635574 |
| rs12563071 | rs12573886 | rs12587268 | rs12598978 | rs12606438 | rs12614880 | rs12625256 | rs12635614 |
| rs12563200 | rs12573992 | rs12587457 | rs12599074 | rs12606620 | rs12614923 | rs12625329 | rs12635653 |
| rs12563213 | rs12574073 | rs12588415 | rs12599106 | rs12606816 | rs12614953 | rs12625495 | rs12635946 |
| rs1256328  | rs1257415  | rs12588573 | rs12599260 | rs12607022 | rs12614998 | rs12625546 | rs1263602  |
| rs1256332  | rs12574281 | rs12588969 | rs12599339 | rs12607275 | rs12615081 | rs12625547 | rs12636078 |
| rs1256335  | rs12574332 | rs12589690 | rs12599637 | rs12607356 | rs12615545 | rs1262557  | rs1263618  |
| rs12563365 | rs1257444  | rs12589699 | rs12599777 | rs12607403 | rs12615720 | rs12625671 | rs1263627  |
| rs12563669 | rs12574749 | rs12590163 | rs12599793 | rs12607679 | rs12615742 | rs12625762 | rs12636275 |
| rs12564022 | rs12574893 | rs12590238 | rs12599911 | rs12607758 | rs12615970 | rs12625893 | rs1263629  |
| rs12564153 | rs12575164 | rs12590630 | rs12599918 | rs12607857 | rs12615974 | rs12626147 | rs12636518 |
| rs12564492 | rs12575252 | rs12590654 | rs12599952 | rs12607898 | rs12615999 | rs12626330 | rs12636552 |
| rs12564600 | rs12575459 | rs12590660 | rs12600060 | rs12607903 | rs12616250 | rs12626388 | rs12636560 |
| rs12564602 | rs12575589 | rs12591294 | rs12600062 | rs12608098 | rs12616546 | rs12626657 | rs12636651 |
| rs12564806 | rs12575600 | rs12591359 | rs12600110 | rs12608181 | rs12616772 | rs12626790 | rs12636669 |
| rs12564992 | rs12575636 | rs12591467 | rs12600121 | rs12608455 | rs12616849 | rs1262720  | rs1263671  |
| rs12565727 | rs12575654 | rs12591647 | rs12600132 | rs12608504 | rs12617004 | rs12627254 | rs1263673  |
| rs1256580  | rs12575685 | rs12591736 | rs12600452 | rs12608544 | rs12617233 | rs12627514 | rs12636784 |
| rs12566098 | rs12576144 | rs12591786 | rs12600720 | rs12608697 | rs12617311 | rs12627601 | rs12636984 |
| rs12566232 | rs12576239 | rs12591944 | rs12600751 | rs12608932 | rs12617371 | rs12627651 | rs12637184 |
| rs12566519 | rs12576258 | rs12592015 | rs12600773 | rs12608949 | rs12617392 | rs12627753 | rs12637471 |
| rs12566888 | rs12576326 | rs12592096 | rs12600794 | rs12608995 | rs1261744  | rs12627970 | rs12637791 |
| rs12566910 | rs12576766 | rs12592111 | rs12600856 | rs12609112 | rs12617656 | rs12628032 | rs12637928 |
| rs12566985 | rs12576775 | rs12592259 | rs12600858 | rs12609177 | rs12617659 | rs12628051 | rs12638072 |
| rs12567114 | rs12576996 | rs12592283 | rs12600861 | rs12609373 | rs12617748 | rs12628403 | rs12638085 |
| rs12567136 | rs12577260 | rs12592780 | rs12601029 | rs12609436 | rs12617864 | rs12628473 | rs12638862 |
| rs12567315 | rs12577283 | rs12592845 | rs12601079 | rs12609500 | rs12617922 | rs12628709 | rs12639276 |
| rs12567402 | rs1257763  | rs12592898 | rs12601333 | rs12609706 | rs12618431 | rs12628891 | rs12639523 |
| rs12567744 | rs12577643 | rs12592967 | rs12601380 | rs12609744 | rs12618491 | rs12629034 | rs12639833 |
| rs12567976 | rs12578279 | rs12593    | rs12601412 | rs12610250 | rs1261876  | rs12629247 | rs12639940 |
| rs12568139 | rs12578953 | rs12593036 | rs12601434 | rs12610495 | rs12618898 | rs12629300 | rs12640189 |
| rs12568153 | rs1257920  | rs12593088 | rs12601658 | rs12610645 | rs12618946 | rs12629746 | rs12640250 |
| rs12568187 | rs1257926  | rs12593229 | rs12601665 | rs1261070  | rs12619285 | rs12629751 | rs12640488 |
| rs12568266 | rs12579302 | rs12593477 | rs12601721 | rs12610709 | rs12619354 | rs12629813 | rs12640626 |
| rs12568655 | rs12579350 | rs12593543 | rs12601925 | rs1261078  | rs12619508 | rs12630174 | rs12641188 |
| rs12568728 | rs12579720 | rs12593629 | rs12601968 | rs12610785 | rs12619531 | rs12630209 | rs12641813 |
| rs12568930 | rs12579753 | rs12593656 | rs12601991 | rs12610825 | rs12619604 | rs12630213 | rs1264191  |
| rs12569027 | rs12579775 | rs12593807 | rs12601994 | rs1261093  | rs12619842 | rs12630483 | rs1264194  |
| rs12569204 | rs12579903 | rs12593813 | rs12602    | rs1261114  | rs12620002 | rs1263056  | rs12641981 |
| rs12569232 | rs12580015 | rs12593818 | rs12602010 | rs1261117  | rs12620074 | rs12630663 | rs12642133 |
| rs12569242 | rs12580347 | rs12593950 | rs12602172 | rs12611275 | rs12620249 | rs12631066 | rs12642606 |
| rs12569272 | rs12580543 | rs12593988 | rs12602195 | rs12611472 | rs12620796 | rs12631477 | rs12642639 |
| rs12569355 | rs12580759 | rs12593998 | rs12602286 | rs12611523 | rs12620844 | rs12631733 | rs12642744 |
| rs12569424 | rs12581220 | rs12594627 | rs12602426 | rs12611922 | rs12621220 | rs12631955 | rs12642790 |
| rs12569457 | rs12581511 | rs12594708 | rs12602486 | rs12612325 | rs12621229 | rs12632003 | rs1264322  |
| rs12569971 | rs12581983 | rs12594711 | rs12602834 | rs12612428 | rs12621278 | rs12632898 | rs12643261 |
| rs12570009 | rs12582034 | rs12595025 | rs12602901 | rs12612590 | rs12621445 | rs12632952 | rs1264332  |

|            |            |            |            |            |            |            |            |
|------------|------------|------------|------------|------------|------------|------------|------------|
| rs12643353 | rs12653946 | rs12665537 | rs12676895 | rs1268974  | rs12700186 | rs12710562 | rs12718598 |
| rs1264347  | rs12654031 | rs12665607 | rs12677454 | rs12690320 | rs12700203 | rs12710696 | rs12718730 |
| rs1264351  | rs12654264 | rs12665952 | rs12677618 | rs12690535 | rs12700239 | rs12711271 | rs12718731 |
| rs1264363  | rs12654393 | rs12666117 | rs12677663 | rs12691088 | rs12700667 | rs12711468 | rs12718928 |
| rs12643771 | rs12654442 | rs12666306 | rs12677858 | rs12691307 | rs12700691 | rs12711472 | rs12719025 |
| rs1264419  | rs12654597 | rs12666411 | rs12678226 | rs12691548 | rs12700814 | rs12711473 | rs12719778 |
| rs1264423  | rs12654709 | rs12666466 | rs12678719 | rs12691702 | rs12700888 | rs12711490 | rs12719801 |
| rs12644329 | rs12654812 | rs12666575 | rs12678759 | rs1269175  | rs12701263 | rs12711521 | rs12719932 |
| rs1264457  | rs12655019 | rs12666989 | rs12678919 | rs12692190 | rs12701265 | rs12711680 | rs12720019 |
| rs1264459  | rs1265507  | rs12667032 | rs12679106 | rs12692365 | rs12701310 | rs12711751 | rs12720356 |
| rs12644734 | rs12655091 | rs12667251 | rs12679242 | rs12692387 | rs12701320 | rs12711836 | rs12720796 |
| rs12644772 | rs12655172 | rs12667582 | rs12679528 | rs12692398 | rs12701427 | rs12711846 | rs12720922 |
| rs12644950 | rs12655258 | rs12667832 | rs12679556 | rs12692572 | rs12701709 | rs12712072 | rs12720926 |
| rs12645001 | rs12655443 | rs12667888 | rs12679834 | rs12692596 | rs12701834 | rs12712073 | rs12721025 |
| rs12645070 | rs12655486 | rs12667919 | rs12680028 | rs12692676 | rs12702029 | rs12712127 | rs12721046 |
| rs1264516  | rs1265564  | rs12668101 | rs12680104 | rs12692737 | rs12702087 | rs12712133 | rs12721051 |
| rs12645584 | rs1265565  | rs12668152 | rs12680217 | rs12692738 | rs12702091 | rs12712135 | rs12721052 |
| rs12645801 | rs12656216 | rs12668183 | rs12680442 | rs12693099 | rs12702262 | rs12712161 | rs12721054 |
| rs1264593  | rs12656223 | rs12668436 | rs1268055  | rs12693399 | rs12702271 | rs12712181 | rs12721109 |
| rs12646216 | rs12656497 | rs12668582 | rs12680655 | rs12693403 | rs12702376 | rs12712262 | rs1272131  |
| rs1264622  | rs12656569 | rs12668724 | rs12680692 | rs12693677 | rs12702516 | rs12712269 | rs1272152  |
| rs12646225 | rs1265757  | rs12668837 | rs1268083  | rs12693853 | rs12703989 | rs12712337 | rs1272192  |
| rs12646353 | rs12657776 | rs12668848 | rs12680842 | rs12693854 | rs12704290 | rs12712388 | rs12722013 |
| rs12646447 | rs12657787 | rs12668853 | rs12680855 | rs12693889 | rs12704868 | rs1271272  | rs12722486 |
| rs12646523 | rs12658032 | rs12668855 | rs12680875 | rs12693907 | rs12705095 | rs12712784 | rs12722489 |
| rs12646808 | rs12658172 | rs12669187 | rs1268119  | rs12693954 | rs12705139 | rs12712870 | rs12722495 |
| rs12647126 | rs1265842  | rs12669267 | rs12681366 | rs12693982 | rs12705149 | rs12712928 | rs12722497 |
| rs12647238 | rs12658451 | rs12669378 | rs12681420 | rs12694002 | rs12705389 | rs12712955 | rs12722502 |
| rs12647647 | rs1265883  | rs12669383 | rs1268161  | rs12694012 | rs12705390 | rs12713004 | rs12722515 |
| rs12648063 | rs12658947 | rs12669521 | rs1268162  | rs12694039 | rs12705393 | rs12713007 | rs12722547 |
| rs12648245 | rs12659017 | rs12669911 | rs12681644 | rs12694277 | rs12705595 | rs12713008 | rs12722559 |
| rs12648788 | rs12659266 | rs1267037  | rs1268168  | rs12694450 | rs12705761 | rs12713012 | rs12722588 |
| rs12648849 | rs12659540 | rs12670376 | rs1268176  | rs12694681 | rs12705849 | rs12713037 | rs12722725 |
| rs12649012 | rs12659719 | rs12670403 | rs12681792 | rs12694846 | rs12705894 | rs1271309  | rs12722987 |
| rs12649662 | rs12659737 | rs1267042  | rs12681990 | rs12694861 | rs12705916 | rs12713315 | rs1272351  |
| rs12649804 | rs12659776 | rs1267062  | rs12682033 | rs12694917 | rs12706122 | rs12713370 | rs12724426 |
| rs12650036 | rs12660057 | rs1267068  | rs12682115 | rs12694997 | rs12706298 | rs12713372 | rs12724449 |
| rs12650112 | rs12660096 | rs12670684 | rs12682344 | rs12695307 | rs12706745 | rs12713403 | rs12724450 |
| rs12650244 | rs12660153 | rs12670798 | rs12682352 | rs12695617 | rs12706746 | rs12713404 | rs12724536 |
| rs1265047  | rs1266071  | rs12670854 | rs12682374 | rs12695694 | rs12706861 | rs12713563 | rs12724708 |
| rs1265048  | rs1266078  | rs12670901 | rs12682628 | rs12695894 | rs12707049 | rs12713575 | rs12724990 |
| rs12650590 | rs12661188 | rs12671091 | rs12682765 | rs12696304 | rs12707083 | rs12713889 | rs12725767 |
| rs1265075  | rs12661232 | rs12671694 | rs12682775 | rs12696498 | rs12707087 | rs12713956 | rs12726043 |
| rs1265080  | rs12661281 | rs12671937 | rs12683020 | rs12697352 | rs12707116 | rs12714017 | rs12726443 |
| rs1265081  | rs12661352 | rs12672022 | rs12683159 | rs12698398 | rs12707134 | rs12714144 | rs12727104 |
| rs1265091  | rs12661667 | rs12672451 | rs12683568 | rs12698403 | rs12707240 | rs12714199 | rs12727448 |
| rs1265093  | rs12662189 | rs1267303  | rs12683699 | rs12698418 | rs12707607 | rs12714240 | rs12727543 |
| rs1265096  | rs12662365 | rs12673062 | rs12683776 | rs1269852  | rs12707676 | rs12714332 | rs12727784 |
| rs1265097  | rs12662618 | rs12673167 | rs12683780 | rs12698820 | rs12707691 | rs12714415 | rs12727980 |
| rs1265099  | rs12662631 | rs12673509 | rs12683791 | rs12698877 | rs12708491 | rs12714592 | rs12728355 |
| rs12651106 | rs12662670 | rs12673949 | rs12684047 | rs12698891 | rs12708514 | rs12714757 | rs12729445 |
| rs1265112  | rs12662869 | rs12674017 | rs12684650 | rs12698897 | rs12708515 | rs12715065 | rs12729448 |
| rs12651313 | rs12663230 | rs12674371 | rs12684930 | rs12699131 | rs12708542 | rs12715461 | rs12729914 |
| rs12651314 | rs12663317 | rs12674515 | rs1268527  | rs12699251 | rs12708665 | rs12715478 | rs12730156 |
| rs1265159  | rs12663356 | rs12674916 | rs12685594 | rs12699415 | rs12708715 | rs1271582  | rs1273044  |
| rs1265165  | rs12663498 | rs1267494  | rs12685659 | rs12699477 | rs12708716 | rs12716337 | rs12730607 |
| rs1265181  | rs12663543 | rs12674957 | rs12686004 | rs12699655 | rs1270884  | rs12716641 | rs12730651 |
| rs12651833 | rs12663742 | rs1267499  | rs12686182 | rs12699844 | rs12708980 | rs12716647 | rs12730935 |
| rs12651896 | rs12664092 | rs12675159 | rs12686364 | rs12699921 | rs1270901  | rs12716871 | rs1273108  |
| rs12652072 | rs12664139 | rs12675621 | rs12686569 | rs12699929 | rs12709013 | rs12716977 | rs12731208 |
| rs12652543 | rs12664873 | rs12675687 | rs12686771 | rs12699999 | rs12709173 | rs12716979 | rs12731372 |
| rs12652687 | rs12664956 | rs12675715 | rs12686780 | rs12700001 | rs12709186 | rs12718244 | rs12731646 |
| rs12652692 | rs12665054 | rs12675862 | rs12687599 | rs12700002 | rs1270942  | rs12718421 | rs12731740 |
| rs12652726 | rs12665247 | rs12675921 | rs1268789  | rs12700003 | rs12709669 | rs12718444 | rs12731981 |
| rs12652920 | rs12665339 | rs12676105 | rs12688091 | rs12700019 | rs12710011 | rs12718465 | rs12732056 |
| rs12653308 | rs12665366 | rs12676145 | rs12688220 | rs12700058 | rs12710327 | rs12718488 | rs12732181 |
| rs12653396 | rs12665391 | rs12676304 | rs12688558 | rs12700059 | rs1271040  | rs12718597 | rs12732806 |

|            |            |            |            |            |            |            |            |
|------------|------------|------------|------------|------------|------------|------------|------------|
| rs12733060 | rs12746898 | rs1275957  | rs12774134 | rs12788072 | rs12803256 | rs12820863 | rs12845470 |
| rs12733073 | rs12747143 | rs1275978  | rs12774577 | rs12788073 | rs12803281 | rs12820906 | rs12845494 |
| rs12733256 | rs12747432 | rs1275980  | rs12775091 | rs12788099 | rs12803321 | rs12821008 | rs12847061 |
| rs12733544 | rs12747719 | rs1275982  | rs12775431 | rs12788102 | rs12803463 | rs12821256 | rs12847546 |
| rs12734260 | rs12747763 | rs1275984  | rs12775438 | rs12788104 | rs12803635 | rs12821310 | rs128494   |
| rs12734374 | rs12748152 | rs1275985  | rs12775501 | rs12788343 | rs12804411 | rs12821416 | rs12850857 |
| rs12734458 | rs12748433 | rs1275986  | rs12775535 | rs12788387 | rs12804787 | rs1282146  | rs1285245  |
| rs12735006 | rs12748436 | rs1275988  | rs12775879 | rs12788404 | rs12805133 | rs12822123 | rs1285284  |
| rs12735232 | rs12748751 | rs12760036 | rs12775980 | rs12788968 | rs12805422 | rs12822416 | rs1285285  |
| rs12735458 | rs12748895 | rs12760039 | rs12776318 | rs12789028 | rs12805664 | rs12822507 | rs12853498 |
| rs12735613 | rs12748961 | rs12760107 | rs12776510 | rs12789313 | rs1280622  | rs12822620 | rs12853508 |
| rs12735657 | rs12749227 | rs12760251 | rs12777    | rs12790196 | rs1280632  | rs12822662 | rs12855717 |
| rs12736195 | rs1274955  | rs12760606 | rs12777211 | rs12790427 | rs12806498 | rs12822733 | rs1285582  |
| rs12736457 | rs12749691 | rs12760654 | rs1277723  | rs12790660 | rs12806645 | rs12822755 | rs12855887 |
| rs12736461 | rs12750027 | rs12760882 | rs12777258 | rs12790943 | rs12806663 | rs12823128 | rs1285594  |
| rs12736689 | rs12750430 | rs12761399 | rs12777288 | rs12791153 | rs12806687 | rs12823194 | rs12856169 |
| rs12737245 | rs12750688 | rs12761729 | rs1277733  | rs1279143  | rs12806763 | rs12823424 | rs12856221 |
| rs12737539 | rs12751530 | rs12761761 | rs12777823 | rs12791447 | rs12807063 | rs12823620 | rs1285678  |
| rs12737669 | rs12751675 | rs12762034 | rs12778014 | rs12791699 | rs12807220 | rs12823740 | rs12857658 |
| rs12737805 | rs12751807 | rs12762379 | rs12778018 | rs12791990 | rs12807250 | rs12824058 | rs1285841  |
| rs12737859 | rs1275186  | rs1276250  | rs1277840  | rs12792379 | rs12807809 | rs12824685 | rs12858483 |
| rs12738340 | rs1275189  | rs12762783 | rs12778514 | rs12792396 | rs12807999 | rs12824957 | rs1285850  |
| rs127384   | rs1275221  | rs12762934 | rs12778662 | rs12792431 | rs12808303 | rs12824973 | rs1285875  |
| rs1273884  | rs12752223 | rs1276296  | rs12779263 | rs12792460 | rs12808544 | rs12825098 | rs1285879  |
| rs1273886  | rs12752290 | rs12762973 | rs12779301 | rs12793173 | rs12808601 | rs12825376 | rs1285885  |
| rs12739181 | rs12752552 | rs12763794 | rs12779388 | rs12793175 | rs12808959 | rs1282545  | rs1285886  |
| rs12739243 | rs12752809 | rs12764057 | rs12779675 | rs12793348 | rs12809354 | rs12825669 | rs1285997  |
| rs12739596 | rs12752838 | rs12764378 | rs12779790 | rs1279403  | rs12810346 | rs12825748 | rs1286063  |
| rs12739999 | rs12752888 | rs12764388 | rs12779954 | rs12794347 | rs12810587 | rs12826178 | rs1286075  |
| rs12740    | rs12752990 | rs12764498 | rs12780111 | rs12794371 | rs12810788 | rs12826248 | rs1286079  |
| rs12740061 | rs12753193 | rs12764593 | rs12780845 | rs12794570 | rs12810864 | rs12826749 | rs1286083  |
| rs12740374 | rs12753251 | rs12764880 | rs1278092  | rs12794618 | rs12811046 | rs12826964 | rs1286127  |
| rs12740679 | rs12753280 | rs12764899 | rs12782078 | rs12794714 | rs12811171 | rs12827555 | rs1286138  |
| rs12740789 | rs12753865 | rs12765002 | rs1278259  | rs12794886 | rs12811301 | rs12827988 | rs1286150  |
| rs12740790 | rs1275411  | rs12765185 | rs12783396 | rs12794995 | rs12811407 | rs12828016 | rs12861824 |
| rs12740837 | rs1275468  | rs12765365 | rs12783467 | rs12795042 | rs12811512 | rs12828063 | rs1286289  |
| rs12740865 | rs12754946 | rs12765878 | rs12783726 | rs12795471 | rs1281154  | rs12828220 | rs1286290  |
| rs12740969 | rs12755266 | rs12765914 | rs12783782 | rs12795957 | rs12811685 | rs12828318 | rs12863103 |
| rs12741113 | rs1275539  | rs12766208 | rs1278402  | rs12796488 | rs12811814 | rs12828693 | rs12863981 |
| rs12741141 | rs12755398 | rs12767022 | rs12784396 | rs1279682  | rs12813035 | rs12828755 | rs12864658 |
| rs12741294 | rs12755606 | rs1276720  | rs12784542 | rs1279683  | rs12813125 | rs12828944 | rs12866570 |
| rs12741781 | rs12755632 | rs12767525 | rs1278493  | rs12797204 | rs12813347 | rs12829457 | rs1286662  |
| rs12741825 | rs12755933 | rs12767583 | rs12784963 | rs12797557 | rs12813389 | rs12829468 | rs12867032 |
| rs12741884 | rs1275600  | rs12767683 | rs12784975 | rs12797706 | rs12814021 | rs12829524 | rs1286771  |
| rs12741980 | rs1275609  | rs12768205 | rs12785018 | rs12797960 | rs12814301 | rs12829682 | rs12868881 |
| rs12742376 | rs12756110 | rs12768310 | rs1278526  | rs12798028 | rs12814443 | rs12829704 | rs12868938 |
| rs12742404 | rs12756209 | rs12768641 | rs1278530  | rs12798333 | rs12814794 | rs12830284 | rs12869776 |
| rs12742531 | rs12756329 | rs12769006 | rs12785387 | rs12798346 | rs12815397 | rs1283104  | rs12869810 |
| rs12742784 | rs12756373 | rs12769128 | rs12785878 | rs12798851 | rs12815523 | rs12831617 | rs12870942 |
| rs12742796 | rs1275679  | rs12769745 | rs12785905 | rs12799126 | rs12815671 | rs1283198  | rs12871092 |
| rs12743520 | rs12756886 | rs12769962 | rs12785939 | rs12799529 | rs12817055 | rs12832171 | rs12871550 |
| rs12743648 | rs12756922 | rs12770172 | rs12786200 | rs12799722 | rs12817488 | rs12832436 | rs12871645 |
| rs12743883 | rs12757183 | rs12770228 | rs12786914 | rs12799746 | rs12817542 | rs12832728 | rs12872801 |
| rs12744222 | rs12757214 | rs12770245 | rs12787112 | rs12800049 | rs12817549 | rs1283298  | rs12873378 |
| rs12744310 | rs12757307 | rs12770479 | rs12787182 | rs12800438 | rs12818673 | rs12833832 | rs128738   |
| rs12744534 | rs12757404 | rs1277060  | rs12787251 | rs12800440 | rs12818766 | rs1283686  | rs12874278 |
| rs1274475  | rs12757436 | rs12771452 | rs12787285 | rs12800450 | rs12818938 | rs1283696  | rs12874404 |
| rs12744757 | rs12757461 | rs12771562 | rs12787293 | rs1280049  | rs12819124 | rs1283705  | rs12874827 |
| rs12745121 | rs1275824  | rs12771973 | rs12787511 | rs12800954 | rs12819172 | rs12837147 | rs12875139 |
| rs12745191 | rs12758407 | rs12772169 | rs1278766  | rs12801188 | rs1281955  | rs12837203 | rs12875339 |
| rs12745411 | rs12759042 | rs12772375 | rs1278768  | rs12801635 | rs1281962  | rs1283935  | rs12876143 |
| rs12745791 | rs1275922  | rs12772424 | rs1278769  | rs12801636 | rs12819689 | rs12839542 | rs12876365 |
| rs12745935 | rs1275923  | rs12772945 | rs12787709 | rs12802112 | rs1281978  | rs1284200  | rs12876545 |
| rs12746073 | rs12759273 | rs12772959 | rs12787765 | rs12802128 | rs12819994 | rs12842575 | rs12878001 |
| rs12746551 | rs12759327 | rs12773625 | rs12787909 | rs12802200 | rs12820413 | rs12844850 | rs12878369 |
| rs12746673 | rs12759477 | rs12773747 | rs12787945 | rs12802244 | rs12820720 | rs12845396 | rs12878451 |
| rs12746703 | rs1275955  | rs12773994 | rs12787996 | rs12802960 | rs12820818 | rs12845465 | rs12878807 |

|            |            |            |            |            |            |            |            |
|------------|------------|------------|------------|------------|------------|------------|------------|
| rs12879423 | rs12893790 | rs12902958 | rs12910910 | rs12919036 | rs12925631 | rs12933120 | rs12942267 |
| rs12879529 | rs12893887 | rs12902973 | rs12910916 | rs12919058 | rs12925761 | rs12933292 | rs12942379 |
| rs12879626 | rs12894153 | rs12903078 | rs12911273 | rs12919083 | rs12925872 | rs12933772 | rs12942547 |
| rs12879697 | rs12894354 | rs12903146 | rs12911407 | rs12919084 | rs12925972 | rs12934042 | rs12942645 |
| rs12879819 | rs12894531 | rs12903205 | rs12911761 | rs12919133 | rs12925999 | rs12935169 | rs12942736 |
| rs12880291 | rs12894780 | rs12903285 | rs12911832 | rs12919509 | rs12926024 | rs12935276 | rs12942811 |
| rs12880339 | rs12894902 | rs12903295 | rs12911981 | rs12920022 | rs12926107 | rs12935413 | rs12942897 |
| rs12880341 | rs12894936 | rs12903563 | rs12912010 | rs1292011  | rs12926226 | rs12935418 | rs12942923 |
| rs12881376 | rs12895330 | rs12903573 | rs12912029 | rs12920150 | rs12926311 | rs12935539 | rs12943131 |
| rs12881735 | rs12895406 | rs12903590 | rs12912045 | rs12920176 | rs12926327 | rs12935567 | rs12943365 |
| rs12881760 | rs12896104 | rs12903656 | rs12912192 | rs12920255 | rs12926477 | rs12935589 | rs12943370 |
| rs12881869 | rs12896360 | rs12903859 | rs12912292 | rs1292034  | rs12926506 | rs12935657 | rs12943464 |
| rs12882    | rs12896393 | rs12903896 | rs12912299 | rs1292035  | rs12926540 | rs12935701 | rs12943517 |
| rs12882688 | rs12896399 | rs12903987 | rs12912342 | rs1292041  | rs12926704 | rs12935775 | rs12943566 |
| rs12882946 | rs12897    | rs12904234 | rs12912380 | rs1292048  | rs12926791 | rs12935890 | rs12943633 |
| rs12883091 | rs12897108 | rs12904669 | rs12912427 | rs1292053  | rs12926803 | rs12936050 | rs12943783 |
| rs12883151 | rs1289736  | rs12905032 | rs12912465 | rs12920553 | rs12926804 | rs12936113 | rs1294404  |
| rs12883788 | rs12897414 | rs12905213 | rs12912777 | rs1292058  | rs12926854 | rs12936319 | rs12944041 |
| rs12884468 | rs12897422 | rs12905223 | rs12913015 | rs1292059  | rs12927162 | rs12936409 | rs1294409  |
| rs12884741 | rs12897542 | rs12905253 | rs12913243 | rs1292061  | rs12927351 | rs12936529 | rs1294410  |
| rs12885071 | rs12897637 | rs12905509 | rs12913259 | rs1292065  | rs12927355 | rs12936587 | rs1294411  |
| rs12885099 | rs12897672 | rs12905525 | rs1291326  | rs1292067  | rs12927360 | rs12936645 | rs1294417  |
| rs12885183 | rs12897763 | rs12905672 | rs12913266 | rs1292069  | rs12927792 | rs1293672  | rs1294420  |
| rs12885221 | rs12897841 | rs12905673 | rs12913324 | rs12920732 | rs12927956 | rs12936934 | rs1294421  |
| rs12885251 | rs12898000 | rs12905847 | rs12913547 | rs12920764 | rs12927959 | rs12937088 | rs1294432  |
| rs12885454 | rs12898295 | rs12906125 | rs12913657 | rs12920772 | rs12928036 | rs12937411 | rs1294436  |
| rs12885458 | rs12898315 | rs12906163 | rs12913832 | rs12920969 | rs12928099 | rs12937692 | rs12944377 |
| rs12885642 | rs12898341 | rs12906447 | rs12914084 | rs12921005 | rs12928131 | rs12937755 | rs1294438  |
| rs12885878 | rs12898361 | rs12906474 | rs12914385 | rs12921170 | rs12928404 | rs12937767 | rs1294448  |
| rs12885977 | rs12898370 | rs12906493 | rs12914489 | rs12921187 | rs12928482 | rs12937989 | rs12944712 |
| rs12885981 | rs12898460 | rs12906552 | rs12914495 | rs12921195 | rs12928503 | rs12938    | rs12944783 |
| rs12886000 | rs12898558 | rs12906662 | rs12914590 | rs12921383 | rs12928520 | rs12938-C  | rs12945254 |
| rs12886310 | rs1289861  | rs12906962 | rs12914623 | rs12921392 | rs12928725 | rs12938031 | rs12945299 |
| rs12886365 | rs1289863  | rs12907068 | rs12914977 | rs12921562 | rs12928822 | rs12938040 | rs12945403 |
| rs1288649  | rs12898729 | rs12907106 | rs12915052 | rs12921670 | rs12928842 | rs12938061 | rs1294554  |
| rs1288650  | rs12898755 | rs12907323 | rs12915659 | rs12921916 | rs12928852 | rs12938235 | rs12945575 |
| rs12886584 | rs12898855 | rs12907384 | rs12915704 | rs12922061 | rs12928897 | rs12938273 | rs12945601 |
| rs12886625 | rs12898856 | rs12907605 | rs12915708 | rs12922098 | rs12929087 | rs12938449 | rs12945708 |
| rs12886628 | rs12899135 | rs1290784  | rs12915841 | rs12922127 | rs12929884 | rs12938581 | rs12945803 |
| rs12887573 | rs12899351 | rs1290786  | rs12915845 | rs12922346 | rs12929950 | rs12938775 | rs12945851 |
| rs12887631 | rs1289939  | rs12907887 | rs12916    | rs12922541 | rs12930096 | rs12938803 | rs12945855 |
| rs12887636 | rs12899430 | rs1290790  | rs1291602  | rs12922615 | rs12930239 | rs12938899 | rs12945870 |
| rs12887734 | rs12899618 | rs12908004 | rs12916023 | rs12922678 | rs12930346 | rs12938956 | rs12945974 |
| rs12887759 | rs12899680 | rs12908161 | rs12916091 | rs12922711 | rs12930452 | rs12939457 | rs12946082 |
| rs12888615 | rs12899811 | rs12908437 | rs12916300 | rs12922822 | rs12930459 | rs12939549 | rs12946146 |
| rs12888678 | rs12899850 | rs12908474 | rs12916360 | rs12923013 | rs12930481 | rs12940030 | rs12946216 |
| rs12888948 | rs12899905 | rs12908766 | rs12916630 | rs12923090 | rs12930743 | rs12940268 | rs12946454 |
| rs12889006 | rs12900061 | rs12908794 | rs12916801 | rs12923319 | rs12930815 | rs12940610 | rs12946510 |
| rs12889085 | rs12900430 | rs12908814 | rs12916871 | rs1292335  | rs12930834 | rs12940622 | rs12946563 |
| rs12889267 | rs12900471 | rs1290898  | rs12916872 | rs12923438 | rs12930850 | rs12940626 | rs12946844 |
| rs12889665 | rs12900609 | rs12909047 | rs12917120 | rs12923444 | rs12931014 | rs12940636 | rs12946942 |
| rs1289011  | rs12900736 | rs12909095 | rs12917376 | rs12923739 | rs12931267 | rs12940701 | rs12947281 |
| rs12890750 | rs1290083  | rs12909502 | rs12917449 | rs12923751 | rs12931497 | rs12940709 | rs1294804  |
| rs12890849 | rs12900860 | rs12909505 | rs12917612 | rs12923795 | rs12931642 | rs12940887 | rs12948233 |
| rs12890924 | rs12901071 | rs12909519 | rs12917707 | rs12923918 | rs12931792 | rs12940923 | rs12948283 |
| rs12890931 | rs12901297 | rs12909646 | rs12917712 | rs12923943 | rs1293202  | rs12941038 | rs12948299 |
| rs12891042 | rs12901372 | rs12909648 | rs12917722 | rs12923991 | rs12932219 | rs12941068 | rs12948326 |
| rs12891191 | rs12901379 | rs12910301 | rs12917944 | rs12924275 | rs12932337 | rs12941318 | rs12948394 |
| rs12891477 | rs12901682 | rs12910361 | rs12918140 | rs12924434 | rs12932445 | rs12941354 | rs12948439 |
| rs12891581 | rs12901789 | rs12910403 | rs1291817  | rs12924536 | rs12932673 | rs12941356 | rs12948940 |
| rs12892257 | rs12901913 | rs12910459 | rs1291818  | rs12924604 | rs12932885 | rs12941469 | rs12949115 |
| rs12892722 | rs12902050 | rs12910525 | rs12918191 | rs12924729 | rs1293292  | rs12941509 | rs12949119 |
| rs1289273  | rs12902421 | rs12910627 | rs1291821  | rs12924783 | rs12932970 | rs12941598 | rs12949256 |
| rs12893151 | rs12902602 | rs12910644 | rs1291823  | rs12924872 | rs1293298  | rs12941811 | rs12949468 |
| rs12893484 | rs12902636 | rs12910825 | rs12918331 | rs12924886 | rs1293303  | rs12942059 | rs12949545 |
| rs12893623 | rs12902680 | rs12910872 | rs12918462 | rs12925026 | rs12933070 | rs12942088 | rs12949587 |
| rs12893668 | rs12902690 | rs12910902 | rs12918782 | rs12925612 | rs12933086 | rs12942207 | rs12949918 |

|            |            |            |            |            |            |            |            |
|------------|------------|------------|------------|------------|------------|------------|------------|
| rs12949956 | rs12960928 | rs12971383 | rs12979860 | rs12991495 | rs13006480 | rs13016963 | rs13024606 |
| rs12950047 | rs12961264 | rs12971645 | rs12980063 | rs12991555 | rs13006483 | rs13017116 | rs13024657 |
| rs12950422 | rs12961565 | rs12971909 | rs12980151 | rs12991815 | rs13006489 | rs13017143 | rs13024765 |
| rs12950562 | rs1296171  | rs12971970 | rs12980251 | rs12991836 | rs13006529 | rs13017199 | rs13024876 |
| rs12950586 | rs12961799 | rs12972028 | rs12980262 | rs12992152 | rs13006587 | rs13017207 | rs13024996 |
| rs12950717 | rs12961969 | rs1297211  | rs12980275 | rs12992267 | rs13006682 | rs13017230 | rs13025126 |
| rs12950756 | rs12962334 | rs12972156 | rs12980348 | rs12992412 | rs130067   | rs13017251 | rs13025717 |
| rs12950923 | rs12962504 | rs12972345 | rs12980600 | rs12992672 | rs13006833 | rs13017455 | rs13026081 |
| rs12951067 | rs12962523 | rs12972366 | rs12980641 | rs12992747 | rs130071   | rs13017599 | rs13026128 |
| rs12951079 | rs12962538 | rs12972476 | rs12980849 | rs12992995 | rs13007211 | rs13017777 | rs13026220 |
| rs12951372 | rs12962555 | rs1297255  | rs12980879 | rs12993249 | rs13007361 | rs13017811 | rs13026245 |
| rs12951408 | rs12962845 | rs1297258  | rs12980942 | rs12993696 | rs13007371 | rs13017846 | rs13026414 |
| rs12951622 | rs12962951 | rs12972609 | rs12981033 | rs12993989 | rs13007705 | rs13018007 | rs13026471 |
| rs12951632 | rs12962980 | rs1297265  | rs12981405 | rs1299403  | rs13008230 | rs13018106 | rs13026565 |
| rs12951741 | rs12963186 | rs12972800 | rs12981683 | rs12994997 | rs13008334 | rs13018210 | rs13026611 |
| rs12951993 | rs12963231 | rs12972849 | rs12982233 | rs12995439 | rs13008603 | rs1301838  | rs13026826 |
| rs12952051 | rs1296328  | rs12972970 | rs12982298 | rs12995480 | rs13008687 | rs13018407 | rs13026837 |
| rs12952191 | rs12963463 | rs12972995 | rs12982744 | rs12996631 | rs13008855 | rs13018640 | rs13027102 |
| rs12952262 | rs12963741 | rs12973055 | rs12982781 | rs12996953 | rs13009008 | rs13018813 | rs13027103 |
| rs12952267 | rs12963831 | rs12973192 | rs12982903 | rs12997015 | rs13009582 | rs13019188 | rs13027159 |
| rs12952286 | rs12963943 | rs12973221 | rs12982956 | rs12997023 | rs13009915 | rs13019227 | rs13027161 |
| rs1295236  | rs12964    | rs12973353 | rs12983010 | rs12997100 | rs13010010 | rs13019313 | rs13027493 |
| rs12952376 | rs12964116 | rs12973524 | rs12983032 | rs12997235 | rs13010104 | rs13019803 | rs13027546 |
| rs12952581 | rs12964248 | rs12973608 | rs12983038 | rs12997242 | rs13010285 | rs13019832 | rs13027560 |
| rs12952729 | rs12964689 | rs12973655 | rs12983058 | rs12997266 | rs13010288 | rs13019859 | rs13027919 |
| rs12952884 | rs12965067 | rs12973672 | rs12983109 | rs12997449 | rs13010566 | rs13020003 | rs13028240 |
| rs12953096 | rs1296535  | rs12973760 | rs12983238 | rs12997617 | rs13010577 | rs13020178 | rs13028246 |
| rs12953422 | rs12965577 | rs12973981 | rs12983339 | rs12997625 | rs13010713 | rs1302019  | rs13028366 |
| rs12953529 | rs12965607 | rs12974234 | rs12983546 | rs12998038 | rs13011058 | rs13020210 | rs13028479 |
| rs12954356 | rs12965763 | rs12974377 | rs12983578 | rs12998046 | rs13011075 | rs13020322 | rs13028787 |
| rs12954372 | rs12966052 | rs12974440 | rs12983728 | rs12998475 | rs13011109 | rs13020391 | rs13028903 |
| rs12954483 | rs12966114 | rs12974458 | rs12983897 | rs12998513 | rs13011157 | rs13020428 | rs13028968 |
| rs12954782 | rs12966221 | rs12974537 | rs12984737 | rs12998806 | rs13011260 | rs13020432 | rs13029144 |
| rs12954824 | rs12966547 | rs12974711 | rs12984770 | rs12999373 | rs13011264 | rs13020443 | rs13029395 |
| rs12955584 | rs12966569 | rs12974777 | rs12984831 | rs12999542 | rs13011472 | rs13020553 | rs13029501 |
| rs12955614 | rs12966571 | rs12974991 | rs12984886 | rs12999687 | rs13011556 | rs13020845 | rs13029602 |
| rs12955644 | rs1296685  | rs12975319 | rs12985    | rs12999907 | rs13011615 | rs13020883 | rs13029742 |
| rs12955791 | rs12967010 | rs12975366 | rs12985029 | rs12999972 | rs13011751 | rs13020935 | rs13029918 |
| rs12955983 | rs12967019 | rs12975577 | rs12985107 | rs13000644 | rs13011842 | rs13020949 | rs1303     |
| rs12956009 | rs12967135 | rs12975762 | rs12985346 | rs13001130 | rs13012070 | rs13021035 | rs13030106 |
| rs12956324 | rs12967143 | rs1297597  | rs12985393 | rs13001283 | rs13012916 | rs13021222 | rs13030174 |
| rs12956326 | rs1296720  | rs12976094 | rs12985771 | rs13001304 | rs13013195 | rs13021222 | rs13030651 |
| rs12956729 | rs12967678 | rs1297620  | rs12985850 | rs13001325 | rs13013209 | rs13021718 | rs13030978 |
| rs1295685  | rs12967725 | rs12976386 | rs12986064 | rs13001372 | rs13013264 | rs13021737 | rs13031064 |
| rs1295686  | rs12967828 | rs12976395 | rs12986231 | rs130017   | rs13013349 | rs13021948 | rs13031237 |
| rs12956892 | rs12967831 | rs12976411 | rs12986413 | rs13002088 | rs13013484 | rs13021985 | rs13031996 |
| rs12956924 | rs12967855 | rs12976574 | rs12986417 | rs13002158 | rs13013705 | rs13022088 | rs13032049 |
| rs12957175 | rs12967878 | rs12976598 | rs12986742 | rs13002470 | rs13013909 | rs13022107 | rs13032103 |
| rs12957463 | rs12968012 | rs12976652 | rs12987286 | rs13002567 | rs13014029 | rs13022141 | rs13032148 |
| rs12957470 | rs12968116 | rs12976739 | rs12987470 | rs13002573 | rs13014235 | rs13022164 | rs13032333 |
| rs12957516 | rs12968338 | rs12976810 | rs12987661 | rs13002630 | rs13014371 | rs13022407 | rs13032427 |
| rs12957987 | rs12968428 | rs12977062 | rs12987662 | rs13002735 | rs13014521 | rs13022414 | rs13032454 |
| rs12958048 | rs12968652 | rs12977104 | rs12987956 | rs13002862 | rs13014644 | rs13022438 | rs13032656 |
| rs12958173 | rs12968719 | rs12977417 | rs12987977 | rs13002867 | rs13014796 | rs13022699 | rs13032786 |
| rs12958467 | rs12969453 | rs12977770 | rs12988231 | rs13002946 | rs13014982 | rs13022873 | rs13032879 |
| rs12959099 | rs12969480 | rs12977787 | rs12988520 | rs13003198 | rs13015496 | rs13022913 | rs13032971 |
| rs1295927  | rs12969597 | rs12978327 | rs12988804 | rs13003334 | rs13015604 | rs13023088 | rs13033060 |
| rs12959642 | rs12969657 | rs12978472 | rs1298934  | rs13003464 | rs13015619 | rs13023277 | rs13033310 |
| rs12959775 | rs12969709 | rs12978678 | rs12989076 | rs13003683 | rs13015698 | rs13023533 | rs13033444 |
| rs12959823 | rs12969848 | rs12978807 | rs12989250 | rs13003975 | rs13015714 | rs13023601 | rs13033467 |
| rs12959908 | rs12970    | rs12979    | rs12989701 | rs13004083 | rs13015798 | rs13023735 | rs13033531 |
| rs12960082 | rs12970066 | rs12979014 | rs12990177 | rs13004237 | rs13015823 | rs13023767 | rs13033576 |
| rs12960235 | rs12970134 | rs12979186 | rs12990266 | rs13004345 | rs13015993 | rs13024140 | rs13033725 |
| rs1296042  | rs12970264 | rs12979278 | rs12990503 | rs13004882 | rs13016316 | rs13024268 | rs13033745 |
| rs12960505 | rs12970649 | rs12979428 | rs12990777 | rs13005282 | rs13016665 | rs13024279 | rs13034294 |
| rs12960829 | rs12970816 | rs12979620 | rs12990959 | rs13005841 | rs13016703 | rs13024541 | rs13034349 |
| rs12960889 | rs12971201 | rs12979813 | rs12991188 | rs13006079 | rs13016883 | rs13024567 | rs13034890 |

|            |            |            |            |            |            |            |            |
|------------|------------|------------|------------|------------|------------|------------|------------|
| rs13035244 | rs13054095 | rs13069553 | rs13082026 | rs13095565 | rs13107347 | rs13124508 | rs1313996  |
| rs13035328 | rs13054099 | rs13069734 | rs13082048 | rs13095889 | rs13107461 | rs13124563 | rs13140176 |
| rs13035366 | rs13054355 | rs13070110 | rs13082532 | rs13096142 | rs13107612 | rs13124827 | rs13140464 |
| rs13035389 | rs13054609 | rs13070180 | rs13082569 | rs13096176 | rs13107665 | rs13125101 | rs13141    |
| rs13035834 | rs13054904 | rs13070279 | rs13082711 | rs13096210 | rs13108043 | rs13125240 | rs13141053 |
| rs13036495 | rs13054906 | rs13070517 | rs13082914 | rs13096357 | rs13108218 | rs13125329 | rs13141124 |
| rs13036662 | rs13055979 | rs13070614 | rs13082924 | rs13096480 | rs13108245 | rs13125440 | rs1314114  |
| rs13037010 | rs13056137 | rs13070844 | rs13083046 | rs13096529 | rs13108419 | rs13125694 | rs13141641 |
| rs13037209 | rs13056435 | rs13070996 | rs13083406 | rs13096683 | rs13109404 | rs131263   | rs13142439 |
| rs13037502 | rs13056506 | rs13071002 | rs1308362  | rs13096731 | rs13109426 | rs13126505 | rs13142500 |
| rs13037515 | rs13056562 | rs13071190 | rs13083798 | rs13096760 | rs13109457 | rs13127398 | rs13142776 |
| rs13038292 | rs13056815 | rs13071423 | rs13084037 | rs13097150 | rs13109974 | rs13127730 | rs13142879 |
| rs13038351 | rs13057133 | rs1307145  | rs13084317 | rs13097248 | rs13109980 | rs13127906 | rs13142920 |
| rs13038717 | rs13057281 | rs13072536 | rs13084363 | rs13097314 | rs13110073 | rs13128377 | rs13143189 |
| rs13038765 | rs13057352 | rs13072552 | rs13085136 | rs13097316 | rs13110266 | rs13128814 | rs13143308 |
| rs13038866 | rs13057446 | rs13072623 | rs13085139 | rs13097407 | rs13110416 | rs13128896 | rs13143477 |
| rs13038869 | rs13058451 | rs13072665 | rs13085379 | rs13097727 | rs13110699 | rs13129280 | rs13143677 |
| rs13039273 | rs13058527 | rs1307274  | rs13085429 | rs13097947 | rs13110736 | rs13129401 | rs13143759 |
| rs13039563 | rs13058615 | rs13072744 | rs13085461 | rs13097957 | rs13111293 | rs13129662 | rs13143871 |
| rs13040088 | rs13059311 | rs13072940 | rs13085791 | rs13097965 | rs13111442 | rs13129697 | rs13144151 |
| rs13040225 | rs13059382 | rs13073161 | rs13086331 | rs13098180 | rs13111599 | rs13129779 | rs131444   |
| rs13040275 | rs13059636 | rs13073466 | rs13086611 | rs13098327 | rs13111638 | rs13129838 | rs13144478 |
| rs13040437 | rs13060333 | rs13073544 | rs13086864 | rs13098866 | rs13111850 | rs13130457 | rs13144764 |
| rs13040446 | rs13060816 | rs13073683 | rs13087    | rs13098911 | rs13112725 | rs13130484 | rs13144869 |
| rs13040449 | rs13061117 | rs13073817 | rs13087058 | rs13098914 | rs13113067 | rs13130548 | rs13145146 |
| rs13040716 | rs13061424 | rs13074711 | rs13087765 | rs13099165 | rs13113518 | rs13130741 | rs13145650 |
| rs13041    | rs13061521 | rs13075101 | rs13088093 | rs13099267 | rs13113577 | rs13130765 | rs13145825 |
| rs13041126 | rs13061527 | rs1307540  | rs13088281 | rs13099273 | rs13113591 | rs13130794 | rs13146355 |
| rs13041173 | rs13061596 | rs13075471 | rs13088318 | rs13099581 | rs13114738 | rs13131350 | rs13146981 |
| rs13041213 | rs13061869 | rs13075615 | rs13088399 | rs13100104 | rs13114851 | rs13131421 | rs13147189 |
| rs13041247 | rs13062093 | rs13076052 | rs13088462 | rs13100114 | rs13114988 | rs13131656 | rs13147758 |
| rs13041756 | rs13062095 | rs13076253 | rs13089287 | rs13100173 | rs13115025 | rs13131930 | rs13148010 |
| rs13041834 | rs13062241 | rs13076312 | rs13089552 | rs13100186 | rs131155   | rs13132085 | rs13148031 |
| rs13042148 | rs13062354 | rs13076366 | rs13089722 | rs13100344 | rs13115570 | rs13132308 | rs13148153 |
| rs13042367 | rs13062635 | rs13076468 | rs13089785 | rs13100619 | rs13115636 | rs13132420 | rs13148728 |
| rs13042504 | rs13062809 | rs13076500 | rs13089906 | rs13100823 | rs13115763 | rs13132430 | rs1314911  |
| rs13042756 | rs13063291 | rs13076750 | rs13089920 | rs13100903 | rs13116036 | rs13132681 | rs1314913  |
| rs13042885 | rs13063312 | rs13076861 | rs13089972 | rs13101202 | rs13116227 | rs13132853 | rs13149359 |
| rs13043176 | rs13063578 | rs13076933 | rs13090173 | rs13101237 | rs13116270 | rs13133213 | rs1314940  |
| rs13043599 | rs13063635 | rs13077048 | rs13090388 | rs13101482 | rs13116306 | rs13133548 | rs13149756 |
| rs13043612 | rs13063979 | rs13077400 | rs13090448 | rs13101508 | rs13116355 | rs13133642 | rs13149993 |
| rs13043754 | rs13064267 | rs13077520 | rs13090803 | rs13101632 | rs13116718 | rs13133952 | rs13150068 |
| rs13044144 | rs13064760 | rs13077895 | rs13090941 | rs13101719 | rs13116809 | rs13134008 | rs13150272 |
| rs13044225 | rs13064915 | rs13078081 | rs13091206 | rs13101828 | rs13116999 | rs13134327 | rs13151178 |
| rs13044413 | rs13065007 | rs13078384 | rs13091704 | rs13102162 | rs13117    | rs13134500 | rs13151374 |
| rs13044683 | rs13065394 | rs13078509 | rs13091933 | rs13102822 | rs13117281 | rs13134598 | rs13151961 |
| rs13044825 | rs13065463 | rs13078687 | rs13092193 | rs13103322 | rs13117307 | rs13134800 | rs13152154 |
| rs13044899 | rs13065626 | rs13078720 | rs13092272 | rs13103534 | rs13117519 | rs13134992 | rs13153019 |
| rs13045492 | rs13065698 | rs13078774 | rs13092376 | rs13103663 | rs13117856 | rs13135092 | rs13153393 |
| rs13045590 | rs13065854 | rs13078807 | rs13092573 | rs13103813 | rs13118306 | rs13135566 | rs13153453 |
| rs13045764 | rs13066050 | rs13078949 | rs13092705 | rs13104078 | rs13118519 | rs13135792 | rs13153816 |
| rs13045827 | rs13066322 | rs13078960 | rs13092876 | rs13104545 | rs13118687 | rs13135934 | rs13154066 |
| rs1304739  | rs13066362 | rs13078967 | rs13093086 | rs13104584 | rs13118820 | rs13136052 | rs13154197 |
| rs13047406 | rs13066454 | rs13079175 | rs13093110 | rs13104866 | rs13118928 | rs13136239 | rs13154429 |
| rs13047416 | rs13066686 | rs13079221 | rs13093352 | rs13104911 | rs13119433 | rs13136295 | rs13154629 |
| rs13048019 | rs13066753 | rs13079368 | rs13093385 | rs13105210 | rs13120076 | rs13136820 | rs13154718 |
| rs13050131 | rs13066789 | rs13079741 | rs13093886 | rs13105581 | rs13120254 | rs13136968 | rs13155003 |
| rs13050142 | rs13066793 | rs13079869 | rs13093889 | rs13105878 | rs13120301 | rs13137008 | rs13155259 |
| rs13050325 | rs13067731 | rs13080163 | rs13094615 | rs13105921 | rs13120371 | rs13137594 | rs13155345 |
| rs13050728 | rs13068138 | rs13080281 | rs13094887 | rs13105983 | rs13120565 | rs1313766  | rs13155750 |
| rs13051496 | rs13068318 | rs1308048  | rs13094915 | rs13106087 | rs13120717 | rs13137667 | rs13155752 |
| rs130516   | rs13068893 | rs13080835 | rs13094957 | rs13106448 | rs131213   | rs13138355 | rs13156231 |
| rs13052418 | rs13068899 | rs13081203 | rs13095117 | rs13106834 | rs13122250 | rs13138431 | rs13156646 |
| rs13053308 | rs13069000 | rs13081778 | rs1309531  | rs13106975 | rs13122305 | rs13138995 | rs13157057 |
| rs13053505 | rs13069049 | rs13081855 | rs1309546  | rs13107091 | rs13122357 | rs13139100 | rs13157159 |
| rs13053850 | rs13069244 | rs13081990 | rs1309550  | rs13107186 | rs13122395 | rs13139571 | rs13157168 |
| rs13054052 | rs13069365 | rs13082002 | rs1309551  | rs13107325 | rs13122790 | rs13139941 | rs13157326 |



|            |            |            |            |            |            |            |            |
|------------|------------|------------|------------|------------|------------|------------|------------|
| rs13157551 | rs13170975 | rs13183434 | rs13194053 | rs13203830 | rs1321535  | rs13228847 | rs13238568 |
| rs13157656 | rs1317140  | rs13183901 | rs13194133 | rs13203948 | rs13215566 | rs132289   | rs132390   |
| rs13158375 | rs13171669 | rs13184643 | rs1319435  | rs13204048 | rs13216391 | rs13229255 | rs13239186 |
| rs13158665 | rs13172043 | rs13184707 | rs13194491 | rs1320448  | rs13216468 | rs13229395 | rs13239238 |
| rs13158670 | rs1317209  | rs13184801 | rs13194504 | rs13204501 | rs13216785 | rs1322944  | rs13239597 |
| rs13159123 | rs13172141 | rs13184816 | rs13194508 | rs13204572 | rs13217239 | rs13229619 | rs1323971  |
| rs13159135 | rs13172324 | rs13184921 | rs13194636 | rs13204742 | rs13217285 | rs13229622 | rs13239736 |
| rs13159365 | rs1317286  | rs13185488 | rs13194702 | rs13204927 | rs13217619 | rs13229637 | rs13239969 |
| rs13159523 | rs13173241 | rs13185520 | rs13194781 | rs13204965 | rs13217620 | rs13229701 | rs13240040 |
| rs13160204 | rs1317349  | rs13185595 | rs13195040 | rs13205180 | rs13218383 | rs1322985  | rs13240065 |
| rs13160735 | rs13173682 | rs13185787 | rs13195149 | rs1320551  | rs1321859  | rs13230111 | rs13240401 |
| rs13160801 | rs1317415  | rs13185930 | rs13195251 | rs13205533 | rs13218591 | rs13230181 | rs13240464 |
| rs13161115 | rs13174179 | rs1318606  | rs13195401 | rs1320562  | rs13218875 | rs13230191 | rs13240994 |
| rs13162062 | rs13174383 | rs13186299 | rs13195459 | rs13205804 | rs1321917  | rs13230421 | rs1324110  |
| rs13162653 | rs13174776 | rs13186320 | rs13195723 | rs13206405 | rs13219206 | rs13230509 | rs13241165 |
| rs13163062 | rs13174863 | rs1318638  | rs13196010 | rs13207171 | rs13219291 | rs13230519 | rs13241235 |
| rs13163173 | rs1317507  | rs1318653  | rs13196329 | rs13207588 | rs13219424 | rs13230583 | rs13241538 |
| rs13163314 | rs1317538  | rs13186637 | rs13196360 | rs1320761  | rs13219432 | rs13230625 | rs13241670 |
| rs13163336 | rs13175566 | rs13186646 | rs13196561 | rs13208164 | rs13219546 | rs13230842 | rs1324183  |
| rs13163533 | rs13176429 | rs13187105 | rs13196629 | rs13208234 | rs13219787 | rs13230845 | rs13241955 |
| rs13163538 | rs13176815 | rs13187289 | rs13196792 | rs13208248 | rs13219893 | rs13231262 | rs13242233 |
| rs13163845 | rs13176921 | rs13187428 | rs13197257 | rs13208701 | rs13220141 | rs1323129  | rs13242758 |
| rs1316386  | rs13176930 | rs13187922 | rs13197384 | rs13208886 | rs13220206 | rs13231367 | rs13242809 |
| rs13163891 | rs1317701  | rs13187930 | rs13197514 | rs13208950 | rs13220261 | rs13231516 | rs13242816 |
| rs13164092 | rs13177031 | rs13188386 | rs13197574 | rs1320903  | rs13220323 | rs1323168  | rs13243267 |
| rs13164188 | rs13177365 | rs13188458 | rs13197622 | rs13209418 | rs1322045  | rs13231718 | rs13243553 |
| rs13164259 | rs131777   | rs1318862  | rs13197633 | rs1320959  | rs13220495 | rs13231886 | rs13243640 |
| rs13164294 | rs13177718 | rs13188633 | rs13197753 | rs13209747 | rs13220570 | rs1323230  | rs13243883 |
| rs13164506 | rs13177755 | rs1318878  | rs13198081 | rs1320976  | rs1322060  | rs13232403 | rs13243921 |
| rs13164684 | rs13177784 | rs13188817 | rs13198298 | rs1320977  | rs13220662 | rs1323292  | rs13244268 |
| rs13164740 | rs131780   | rs13188819 | rs13198304 | rs13209872 | rs13220896 | rs13232979 | rs13244629 |
| rs13164785 | rs131781   | rs13188960 | rs13198474 | rs13209911 | rs1322131  | rs13233131 | rs13244654 |
| rs13164856 | rs13178130 | rs13189192 | rs13198641 | rs13210143 | rs1322148  | rs13233308 | rs1324481  |
| rs13165004 | rs131785   | rs13189275 | rs13198656 | rs13210323 | rs13221560 | rs13233322 | rs13245024 |
| rs13165038 | rs13178677 | rs13189284 | rs13198716 | rs13210325 | rs13221668 | rs13233438 | rs13245206 |
| rs131654   | rs1317885  | rs1318947  | rs13198761 | rs13210511 | rs13221852 | rs13233571 | rs13245690 |
| rs13165403 | rs13178866 | rs13189678 | rs13199524 | rs13211166 | rs13222543 | rs13233604 | rs13245899 |
| rs13165419 | rs13179048 | rs1318995  | rs13199610 | rs13211313 | rs1322278  | rs13233706 | rs13246220 |
| rs13165424 | rs1317931  | rs13189957 | rs13199649 | rs13211463 | rs13223036 | rs13233747 | rs13246286 |
| rs1316543  | rs131794   | rs13189973 | rs13199764 | rs13211840 | rs13223152 | rs13233916 | rs13246546 |
| rs13165478 | rs13179411 | rs13190036 | rs1319994  | rs13211947 | rs13223303 | rs13234131 | rs13246732 |
| rs13165531 | rs13179413 | rs1319012  | rs13200150 | rs13211972 | rs13223890 | rs13234269 | rs13247119 |
| rs13165542 | rs13179493 | rs1319017  | rs13200245 | rs13212041 | rs13223928 | rs13234378 | rs13247236 |
| rs131656   | rs13179617 | rs13190235 | rs13200335 | rs13212044 | rs13224082 | rs1323438  | rs13247499 |
| rs131657   | rs131798   | rs13190379 | rs13200531 | rs13212093 | rs13224108 | rs13234407 | rs13247777 |
| rs131658   | rs1317983  | rs13190880 | rs13200569 | rs1321247  | rs13224222 | rs13234490 | rs13247874 |
| rs131660   | rs13180    | rs13190932 | rs13200945 | rs13212534 | rs13224557 | rs13234724 | rs13248423 |
| rs13166360 | rs131801   | rs13191038 | rs13200993 | rs13212562 | rs13224947 | rs13234909 | rs13248499 |
| rs13166557 | rs13180294 | rs13191296 | rs13201081 | rs1321257  | rs13225158 | rs13234914 | rs13248650 |
| rs13166766 | rs13180395 | rs13191343 | rs13201294 | rs13212651 | rs13225333 | rs13235131 | rs13248757 |
| rs13167280 | rs13180399 | rs13191362 | rs13201341 | rs13212846 | rs1322537  | rs13235246 | rs13249022 |
| rs1316739  | rs131804   | rs13191376 | rs1320139  | rs13212930 | rs13225723 | rs13235319 | rs1324913  |
| rs1316753  | rs131805   | rs13191445 | rs13201430 | rs1321308  | rs1322599  | rs13235365 | rs13249447 |
| rs13167610 | rs131806   | rs13191450 | rs13201459 | rs1321309  | rs13226049 | rs13235543 | rs13249843 |
| rs1316776  | rs131807   | rs13191659 | rs1320164  | rs1321310  | rs13226190 | rs1323591  | rs13249975 |
| rs13168136 | rs13180726 | rs13191948 | rs13201681 | rs1321311  | rs13226195 | rs13236223 | rs13250197 |
| rs13168787 | rs131808   | rs13192471 | rs13201764 | rs1321313  | rs1322639  | rs13236526 | rs13250295 |
| rs13168838 | rs13181561 | rs13192476 | rs13201782 | rs13213152 | rs13226583 | rs13236689 | rs13250583 |
| rs13169    | rs13181748 | rs13192566 | rs13201877 | rs13213536 | rs13226650 | rs13236827 | rs13250871 |
| rs13169187 | rs1318175  | rs13192569 | rs13202295 | rs13213884 | rs13226653 | rs13237518 | rs1325118  |
| rs13169267 | rs13181874 | rs13192740 | rs1320251  | rs13213957 | rs13226841 | rs13237637 | rs13251292 |
| rs13169274 | rs13182141 | rs13192841 | rs13203101 | rs13213986 | rs13227393 | rs13237750 | rs13251458 |
| rs13169290 | rs13182155 | rs13192976 | rs13203140 | rs13214023 | rs13227497 | rs13238203 | rs1325273  |
| rs13169378 | rs1318236  | rs13192994 | rs13203153 | rs13214027 | rs132275   | rs13238352 | rs13253111 |
| rs1316979  | rs13182402 | rs13193176 | rs1320330  | rs1321419  | rs1322774  | rs132384   | rs13253288 |
| rs1316982  | rs13182707 | rs13193227 | rs13203384 | rs13214992 | rs13227860 | rs13238404 | rs13253290 |
| rs1317082  | rs1318322  | rs13193887 | rs1320344  | rs1321512  | rs1322842  | rs13238550 | rs13253358 |

|            |            |            |            |            |             |            |            |
|------------|------------|------------|------------|------------|-------------|------------|------------|
| rs13253386 | rs13264586 | rs1327646  | rs13288021 | rs13300663 | rs13320485  | rs13334473 | rs13361335 |
| rs1325339  | rs13264759 | rs13276516 | rs13288130 | rs13300853 | rs13320646  | rs13334558 | rs13361438 |
| rs13253502 | rs13264909 | rs13276692 | rs13288470 | rs13300927 | rs13320959  | rs13334594 | rs1336149  |
| rs13254598 | rs13265017 | rs13276735 | rs132889   | rs13301002 | rs1332099   | rs13335236 | rs13361548 |
| rs13254613 | rs13265201 | rs13276769 | rs1328899  | rs1330118  | rs1332101   | rs13335344 | rs13361707 |
| rs13254738 | rs13265333 | rs13277113 | rs13289    | rs133015   | rs13322435  | rs13335497 | rs1336486  |
| rs13254990 | rs1326543  | rs13277237 | rs13289026 | rs1330158  | rs13322873  | rs13335629 | rs13365225 |
| rs13255004 | rs13265769 | rs13277355 | rs13289095 | rs13301660 | rs13323006  | rs13335685 | rs133666   |
| rs13255030 | rs13266066 | rs13277542 | rs13289294 | rs133019   | rs1332328   | rs1333633  | rs1336900  |
| rs13255070 | rs13266183 | rs13277568 | rs1328965  | rs13301969 | rs1332329   | rs1333634  | rs1337281  |
| rs13255193 | rs13266210 | rs13277721 | rs13289810 | rs1330225  | rs13323506  | rs13336378 | rs1337415  |
| rs13255292 | rs13266268 | rs13277801 | rs13290326 | rs13302616 | rs13324323  | rs13336428 | rs13374761 |
| rs1325598  | rs13266287 | rs13277810 | rs1329044  | rs133027   | rs13324482  | rs13336470 | rs13375019 |
| rs13256023 | rs13266463 | rs13277976 | rs13290451 | rs13303    | rs13325613  | rs13336880 | rs1337526  |
| rs13256025 | rs13266634 | rs13278062 | rs13290575 | rs13303004 | rs13326165  | rs13337037 | rs13375749 |
| rs13256214 | rs13267180 | rs1327808  | rs132906   | rs13303010 | rs1332618   | rs13337052 | rs13375942 |
| rs13256357 | rs13267290 | rs1327827  | rs1329101  | rs1330303  | rs13327021  | rs13337177 | rs13376197 |
| rs13256367 | rs13267351 | rs13278849 | rs13291079 | rs13303058 | rs13327482  | rs133383   | rs13376289 |
| rs13256888 | rs13267382 | rs13278931 | rs132911   | rs1330307  | rs1332790   | rs13338621 | rs13376333 |
| rs132570   | rs13267464 | rs13278965 | rs13291234 | rs13303224 | rs1332813   | rs13338946 | rs13376700 |
| rs13257021 | rs1326797  | rs13279104 | rs1329125  | rs13303252 | rs13328187  | rs1333904  | rs13376709 |
| rs132571   | rs13268    | rs1327942  | rs1329128  | rs13303327 | rs13328298  | rs13339074 | rs1337736  |
| rs13257363 | rs13268108 | rs13279799 | rs13291289 | rs13303359 | rs13328356  | rs13339140 | rs13377754 |
| rs132575   | rs13268508 | rs13279820 | rs13291664 | rs1330349  | rs13329140  | rs13339407 | rs13378103 |
| rs13257503 | rs13268621 | rs13280010 | rs13291723 | rs133047   | rs13329271  | rs13339636 | rs13378861 |
| rs13257813 | rs13268738 | rs13280055 | rs13291753 | rs13306194 | rs1332941   | rs1333973  | rs13379043 |
| rs13258410 | rs13269725 | rs1328006  | rs13291798 | rs13306206 | rs1332950   | rs1333991  | rs13379119 |
| rs13258512 | rs13270051 | rs13280442 | rs13292136 | rs13306556 | rs1332957   | rs13340130 | rs13379303 |
| rs13259038 | rs13270182 | rs13280592 | rs13292699 | rs13306561 | rs13329672  | rs13342232 | rs13379337 |
| rs13259125 | rs13270194 | rs13280929 | rs132929   | rs13306575 | rs13329835  | rs1334297  | rs13379794 |
| rs1325920  | rs13270267 | rs13280978 | rs132930   | rs13306728 | rs13329943  | rs1334299  | rs1338009  |
| rs13259407 | rs13270346 | rs13281186 | rs13293465 | rs13306775 | rs13329952  | rs13343081 | rs13380104 |
| rs13259522 | rs13270641 | rs13281294 | rs13294    | rs13306780 | rs13330098  | rs133441   | rs13380185 |
| rs13259607 | rs13270718 | rs13281564 | rs132941   | rs1330745  | rs1333010   | rs13344313 | rs13380251 |
| rs13259933 | rs1327078  | rs13281615 | rs13294100 | rs13308125 | rs13330163  | rs1334456  | rs13380830 |
| rs1325994  | rs13271002 | rs13281988 | rs1329424  | rs1330816  | rs13330176  | rs1334561  | rs13381096 |
| rs13259960 | rs13271228 | rs13282134 | rs1329428  | rs1330826  | rs13330216  | rs13345612 | rs13381557 |
| rs13260    | rs1327123  | rs13282237 | rs13294439 | rs1330887  | rs1333037   | rs1334576  | rs13381817 |
| rs13260434 | rs13271368 | rs13282289 | rs13294734 | rs1330889  | rs1333040   | rs1334577  | rs1338219  |
| rs13260471 | rs13271456 | rs13282477 | rs13294895 | rs1331012  | rs1333042   | rs13346603 | rs13382259 |
| rs13261217 | rs13271489 | rs13283146 | rs13295248 | rs13310449 | rs1333045   | rs1335055  | rs1338227  |
| rs1326122  | rs13271691 | rs13283282 | rs1329572  | rs13311500 | rs1333047   | rs13353194 | rs13382553 |
| rs13261481 | rs1327199  | rs13283416 | rs13295887 | rs1331191  | rs1333049   | rs1335415  | rs1338263  |
| rs13261573 | rs1327235  | rs13283645 | rs1329631  | rs1331308  | rs1333051   | rs13354746 | rs13382811 |
| rs13261635 | rs13272392 | rs1328369  | rs13296345 | rs1331309  | rs1333054   | rs1335482  | rs13383034 |
| rs13261666 | rs13272451 | rs1328371  | rs1329650  | rs13313261 | rs13330552  | rs13355228 | rs13383265 |
| rs13261773 | rs1327259  | rs13283933 | rs13296519 | rs13313564 | rs1333062   | rs1335532  | rs1338356  |
| rs13261848 | rs13272659 | rs13284054 | rs13296664 | rs13313639 | rs13331     | rs13355364 | rs13383994 |
| rs1326201  | rs1327301  | rs13284106 | rs13297246 | rs13313741 | rs13331259  | rs1335540  | rs13384448 |
| rs13262031 | rs13273123 | rs1328412  | rs13297267 | rs13313995 | rs13331491  | rs13355485 | rs13384711 |
| rs13262595 | rs1327315  | rs13284142 | rs13297295 | rs13314114 | rs13332     | rs13355543 | rs13384756 |
| rs13262617 | rs13273454 | rs13284170 | rs1329733  | rs13314271 | rs13332145  | rs1335645  | rs13384903 |
| rs1326269  | rs13273654 | rs13284516 | rs1329767  | rs13314892 | rs1333220   | rs13357015 | rs13384908 |
| rs13262861 | rs13273810 | rs1328454  | rs13297831 | rs13314993 | rs13332432  | rs13357230 | rs13385171 |
| rs13263073 | rs13274067 | rs13284665 | rs13298062 | rs13315174 | rs13332522  | rs13357820 | rs1338547  |
| rs13263338 | rs13274146 | rs13284787 | rs13298297 | rs13315469 | rs13332649  | rs13358334 | rs1338549  |
| rs13263376 | rs13274191 | rs13284900 | rs132985   | rs13315649 | rs13333054  | rs13358657 | rs1338552  |
| rs13263508 | rs13274594 | rs132850   | rs13299074 | rs13315871 | rs13333062  | rs13358767 | rs1338554  |
| rs13263601 | rs13274806 | rs1328599  | rs13299293 | rs13316620 | rs13333226  | rs1335927  | rs13385593 |
| rs13263674 | rs1327494  | rs13286210 | rs13299342 | rs1331698  | rs13333358  | rs13359291 | rs13385731 |
| rs13263709 | rs13275502 | rs13286845 | rs13299380 | rs13317    | rs1333348   | rs13359742 | rs13386282 |
| rs13263821 | rs13275517 | rs13287061 | rs13299788 | rs13318853 | rs13333522  | rs13360007 | rs13386347 |
| rs13263909 | rs13275869 | rs13287066 | rs1330     | rs13318870 | rs13333637  | rs13360092 | rs13386673 |
| rs13264172 | rs1327589  | rs1328757  | rs13300004 | rs13318932 | rs13333659  | rs13360902 | rs13387042 |
| rs132644   | rs13276026 | rs13287724 | rs13300056 | rs13318986 | rs13333747  | rs13361043 | rs1338721  |
| rs13264524 | rs13276212 | rs13287938 | rs13300218 | rs13319205 | rs1333342   | rs13361131 | rs13387221 |
| rs13264580 | rs13276309 | rs13288002 | rs13300483 | rs13319916 | rs133334364 | rs13361189 | rs13387240 |

|            |            |            |            |           |             |           |             |
|------------|------------|------------|------------|-----------|-------------|-----------|-------------|
| rs13387347 | rs13401064 | rs13413443 | rs13430258 | rs134639  | rs1353910   | rs1362546 | rs1370063   |
| rs13387838 | rs13401104 | rs13413639 | rs13430465 | rs1346408 | rs1354034   | rs1362622 | rs13702     |
| rs13388333 | rs13401281 | rs13413838 | rs13430745 | rs1346720 | rs1354053   | rs1362623 | rs137079    |
| rs13388394 | rs13401333 | rs13413953 | rs13430823 | rs1346749 | rs1354106   | rs1362739 | rs13708     |
| rs133885   | rs13401630 | rs13414105 | rs13431149 | rs1346786 | rs1354115   | rs1362756 | rs137091    |
| rs13388996 | rs13401703 | rs13414140 | rs13431529 | rs1346841 | rs1354674   | rs1362800 | rs1371044   |
| rs1338907  | rs13401811 | rs13414156 | rs13431652 | rs13469   | rs1354774   | rs1362910 | rs1371045   |
| rs13389219 | rs13402    | rs13414381 | rs13432055 | rs1346972 | rs1355146   | rs136293  | rs1371182   |
| rs13389408 | rs13402475 | rs13414393 | rs13432332 | rs1347188 | rs1355459   | rs1362931 | rs1371187   |
| rs13389563 | rs13402497 | rs13414440 | rs13432340 | rs1347345 | rs1355619   | rs13631   | rs1371325   |
| rs13389599 | rs13402560 | rs13415097 | rs13433330 | rs1347767 | rs1355620   | rs1363103 | rs1371467   |
| rs13390019 | rs13402561 | rs13415288 | rs13434089 | rs1347901 | rs135563    | rs1363119 | rs137156    |
| rs133902   | rs13402783 | rs13415465 | rs13434116 | rs1348005 | rs1355642   | rs1363232 | rs1371614   |
| rs13390610 | rs13402908 | rs13415550 | rs13434265 | rs1348049 | rs1356334   | rs1363605 | rs1371619   |
| rs13390641 | rs13403122 | rs13416322 | rs13434277 | rs1348206 | rs1356493   | rs1363695 | rs1371794   |
| rs13390936 | rs13403127 | rs13416449 | rs1343605  | rs134837  | rs1356506   | rs1363907 | rs1371799   |
| rs13391004 | rs13403656 | rs13416555 | rs13436243 | rs1348371 | rs1356798   | rs1363919 | rs1371810   |
| rs13391128 | rs13403657 | rs13416665 | rs1343676  | rs1348526 | rs1357051   | rs136402  | rs1371951   |
| rs13391332 | rs134041   | rs13416733 | rs1343700  | rs1348557 | rs1357318   | rs1364063 | rs13720     |
| rs1339139  | rs13404250 | rs13416992 | rs13437082 | rs1348581 | rs1357531   | rs1364077 | rs1372072   |
| rs13391552 | rs13405158 | rs13417036 | rs13437088 | rs1348693 | rs1357651   | rs136422  | rs1372288   |
| rs13391754 | rs13405173 | rs13417156 | rs13437326 | rs134879  | rs1357685   | rs1364229 | rs13723     |
| rs13391980 | rs13405699 | rs13417165 | rs13437444 | rs1349140 | rs1357798   | rs1364344 | rs1372330   |
| rs13392139 | rs13405728 | rs13417287 | rs1343775  | rs1349265 | rs1358023   | rs1364422 | rs1372343   |
| rs13392222 | rs13405741 | rs1341729  | rs1343776  | rs1349359 | rs1358391   | rs1364745 | rs1372518   |
| rs1339227  | rs13405815 | rs13417487 | rs13437771 | rs1349405 | rs1358453   | rs1364934 | rs1372691   |
| rs13392272 | rs13406280 | rs13417564 | rs13438494 | rs1349471 | rs1358684   | rs1365120 | rs1372797   |
| rs13392494 | rs13406302 | rs13417750 | rs1343874  | rs1349497 | rs1358836   | rs136528  | rs1372876   |
| rs13392670 | rs1340653  | rs13417783 | rs13438897 | rs1349520 | rs1358980   | rs1365297 | rs1373004   |
| rs13392977 | rs13406620 | rs13418577 | rs1343920  | rs1349596 | rs1359062   | rs1365303 | rs1373067   |
| rs13393068 | rs13407401 | rs13419021 | rs13439415 | rs1349852 | rs1359232   | rs136534  | rs1373129   |
| rs13393256 | rs13407583 | rs13419716 | rs1344035  | rs135009  | rs1359239   | rs1365505 | rs1373178   |
| rs13393304 | rs134077   | rs13419763 | rs1344293  | rs1350100 | rs1359328   | rs136554  | rs1373349   |
| rs13393577 | rs13407913 | rs13420463 | rs1344374  | rs1350193 | rs1359543   | rs1365658 | rs13734     |
| rs13393656 | rs1340817  | rs13421039 | rs1344490  | rs1350559 | rs1359602   | rs1365975 | rs1373692   |
| rs13393800 | rs1340818  | rs13421971 | rs1344533  | rs1350723 | rs1359624   | rs1366045 | rs13737     |
| rs1339382  | rs1340819  | rs1342228  | rs1344555  | rs1351164 | rs1359688   | rs1366594 | rs1373851   |
| rs13394092 | rs13408433 | rs13422522 | rs1344603  | rs1351266 | rs1359742   | rs1366689 | rs1373866   |
| rs13394343 | rs13408514 | rs13422673 | rs1344632  | rs1351394 | rs1359790   | rs1366691 | rs1373921   |
| rs13394619 | rs13408661 | rs1342326  | rs1344642  | rs135150  | rs1359849   | rs1366883 | rs1374117   |
| rs13394970 | rs13409142 | rs13423444 | rs1344645  | rs1351592 | rs1360123   | rs1367023 | rs1374204   |
| rs13395010 | rs13409360 | rs1342391  | rs1344653  | rs1351623 | rs136029    | rs1367117 | rs1374326   |
| rs13395129 | rs13409371 | rs13423972 | rs1344672  | rs1351637 | rs1360379   | rs1367187 | rs1374329   |
| rs13395141 | rs13409636 | rs13424410 | rs1344674  | rs1351682 | rs1360380   | rs1367217 | rs1375131   |
| rs13395354 | rs13409705 | rs13424581 | rs13447324 | rs1351848 | rs136047    | rs1367226 | rs1375311   |
| rs13395467 | rs1340981  | rs13424612 | rs13447390 | rs1351880 | rs1360485   | rs1367228 | rs1375493   |
| rs1339552  | rs13409819 | rs13424740 | rs13447455 | rs1352014 | rs1360589   | rs1367233 | rs1375561   |
| rs13395777 | rs13409834 | rs13425585 | rs1344762  | rs1352557 | rs1360692   | rs1367469 | rs1375631   |
| rs13395911 | rs13410155 | rs1342586  | rs1344852  | rs1352714 | rs1360950   | rs1367633 | rs1375647   |
| rs13396091 | rs13410232 | rs13425999 | rs1344981  | rs1352724 | rs1360983   | rs1367693 | rs1375694   |
| rs13396259 | rs13410318 | rs13426445 | rs1345202  | rs1352755 | rs1361108   | rs1367858 | rs1375961   |
| rs13396415 | rs13410389 | rs13426680 | rs1345203  | rs1352809 | rs1361277   | rs1368250 | rs137603    |
| rs13396935 | rs13410405 | rs13426947 | rs1345229  | rs1352846 | rs13615     | rs1368546 | rs1376216   |
| rs13397    | rs13410783 | rs13427672 | rs1345259  | rs1352887 | rs1361686   | rs1368549 | rs1376289   |
| rs13397529 | rs13411140 | rs13427822 | rs1345278  | rs1352890 | rs1361728   | rs1368550 | rs1376303   |
| rs1339759  | rs13411363 | rs13427957 | rs1345417  | rs1352982 | rs1361739   | rs1368652 | rs137631    |
| rs13397985 | rs13411625 | rs1342831  | rs1345467  | rs1353171 | rs1361754-G | rs136872  | rs137686    |
| rs133980   | rs13411858 | rs13428598 | rs134551   | rs1353248 | rs1361831   | rs1368737 | rs1376935   |
| rs13398147 | rs13412    | rs13428770 | rs134557   | rs1353286 | rs1361907   | rs1368748 | rs1377164   |
| rs13398233 | rs13412001 | rs13428812 | rs134567   | rs1353394 | rs1362104   | rs1368888 | rs1377454   |
| rs13398375 | rs13412022 | rs13428823 | rs1345777  | rs13534   | rs136211    | rs1368928 | rs1377807   |
| rs1339847  | rs1341215  | rs13428870 | rs134593   | rs1353545 | rs136213    | rs1369127 | rs1377889   |
| rs13398860 | rs13412194 | rs13428910 | rs134594   | rs1353649 | rs1362212   | rs1369128 | rs1378214   |
| rs13399758 | rs13412535 | rs13429049 | rs1346     | rs1353747 | rs1362227   | rs1369159 | rs1378358   |
| rs13400297 | rs1341267  | rs13429458 | rs1346004  | rs1353778 | rs136233    | rs1369429 | rs1378363   |
| rs1340044  | rs13412757 | rs13429599 | rs1346081  | rs1353792 | rs1362376   | rs13695   | rs137853120 |
| rs1340102  | rs1341278  | rs13430227 | rs134613   | rs13538   | rs1362404   | rs1369862 | rs1378552   |

|             |             |             |             |             |             |             |             |
|-------------|-------------|-------------|-------------|-------------|-------------|-------------|-------------|
| rs1378559   | rs138060088 | rs138283229 | rs138485827 | rs1386625   | rs138843352 | rs139029488 | rs139229209 |
| rs137858393 | rs138060871 | rs138284316 | rs138488080 | rs138665726 | rs138843544 | rs139030    | rs139236208 |
| rs137858877 | rs138061710 | rs138284624 | rs138488218 | rs138672638 | rs1388479   | rs1390401   | rs139237746 |
| rs137867987 | rs138062971 | rs138285687 | rs138489947 | rs138678612 | rs138850297 | rs139043764 | rs139239158 |
| rs137874109 | rs1380646   | rs1382879   | rs138491068 | rs138680343 | rs138852655 | rs139045492 | rs1392428   |
| rs1378835   | rs1380703   | rs138288642 | rs138491296 | rs138681421 | rs138854355 | rs139047235 | rs139244147 |
| rs137885341 | rs138074335 | rs1382894   | rs138492110 | rs138682554 | rs138857    | rs139051778 | rs139244745 |
| rs137886986 | rs138084129 | rs13829     | rs138493184 | rs138689397 | rs1388585   | rs139052240 | rs139246187 |
| rs137888851 | rs138088171 | rs138294113 | rs1384974   | rs138692741 | rs138864366 | rs139053146 | rs139247810 |
| rs1378892   | rs138090420 | rs138295924 | rs138501911 | rs138692864 | rs138866907 | rs139055942 | rs1392502   |
| rs137891020 | rs138090874 | rs138296890 | rs138510303 | rs138696382 | rs138870727 | rs13906     | rs139252537 |
| rs137893155 | rs138096085 | rs138303849 | rs1385108   | rs138698575 | rs138871903 | rs139063750 | rs139253024 |
| rs1378938   | rs138096147 | rs138308793 | rs1385167   | rs138699938 | rs138876904 | rs139066356 | rs139262716 |
| rs1378942   | rs1381010   | rs13831     | rs138519360 | rs138700403 | rs138877676 | rs1390712   | rs139266382 |
| rs137901696 | rs138107037 | rs138310191 | rs138525217 | rs138701026 | rs1388785   | rs139077481 | rs139271800 |
| rs137902590 | rs138108628 | rs138311480 | rs1385253   | rs138705    | rs1388786   | rs139087387 | rs139273519 |
| rs137904686 | rs138108930 | rs1383116   | rs138529890 | rs138708    | rs138879113 | rs139088362 | rs139276089 |
| rs1379096   | rs138118674 | rs138315285 | rs138532692 | rs138712481 | rs138879185 | rs139089160 | rs1392816   |
| rs137909720 | rs1381247   | rs138319634 | rs138534124 | rs138712596 | rs138885196 | rs139090700 | rs1392817   |
| rs137912555 | rs1381274   | rs1383258   | rs138535374 | rs138714031 | rs138885312 | rs139092879 | rs139285835 |
| rs137913153 | rs1381287   | rs138326449 | rs138535856 | rs1387153   | rs138887197 | rs139097404 | rs139292688 |
| rs137916697 | rs138133138 | rs138329430 | rs1385374   | rs138715366 | rs138887682 | rs139099016 | rs1392935   |
| rs1379192   | rs1381335   | rs138331350 | rs138538714 | rs138717729 | rs138895122 | rs139110493 | rs139293840 |
| rs137919848 | rs138137383 | rs138335    | rs138538719 | rs138723628 | rs138898092 | rs139113145 | rs1392949   |
| rs137922381 | rs1381486   | rs138337556 | rs138539707 | rs138723875 | rs138903557 | rs139113505 | rs1392953   |
| rs1379227   | rs138151052 | rs138341189 | rs138541467 | rs138726443 | rs138903843 | rs139114659 | rs139299350 |
| rs137923903 | rs138151712 | rs138346219 | rs138544659 | rs138727422 | rs1389044   | rs139120857 | rs139299944 |
| rs137926455 | rs1381556   | rs13835     | rs1385499   | rs138727949 | rs138909    | rs139121778 | rs139300217 |
| rs137926936 | rs138156467 | rs138351    | rs1385504   | rs138730    | rs138910098 | rs139124820 | rs139301764 |
| rs1379281   | rs138157424 | rs138352    | rs138550853 | rs138730454 | rs138915921 | rs139129572 | rs139314951 |
| rs137928907 | rs138158    | rs138354    | rs138551969 | rs138741635 | rs138916004 | rs139130389 | rs139314969 |
| rs137929115 | rs138158275 | rs138354839 | rs138553394 | rs138742290 | rs138916184 | rs139136389 | rs139316391 |
| rs137933720 | rs1381660   | rs138358301 | rs138556413 | rs138745417 | rs1389171   | rs1391371   | rs139320396 |
| rs137933779 | rs138166261 | rs1383592   | rs138559094 | rs138747    | rs138918    | rs139137459 | rs139326808 |
| rs137948794 | rs1381666   | rs138364069 | rs138560548 | rs138747966 | rs138919787 | rs139141104 | rs139331653 |
| rs137952017 | rs138171347 | rs138385919 | 8           | rs138748649 | rs138922864 | rs139141690 | rs139332374 |
| rs137955    | rs138171634 | rs138389495 | rs138569214 | rs138750    | rs1389271   | rs1391438   | rs1393347   |
| rs13796     | rs1381775   | rs1383930   | rs138570705 | rs138751626 | rs138934745 | rs1391439   | rs1393350   |
| rs137962487 | rs138177673 | rs138394556 | rs138572223 | rs138753323 | rs138937927 | rs1391440   | rs139341533 |
| rs137969593 | rs138186803 | rs138395523 | rs138572433 | rs138760312 | rs138942288 | rs1391441   | rs139344622 |
| rs137969745 | rs138190086 | rs138396859 | rs138584487 | rs138766446 | rs1389473   | rs1391513   | rs139352934 |
| rs137976953 | rs138191615 | rs138407416 | rs138587317 | rs138767389 | rs138952514 | rs139153935 | rs139354822 |
| rs1379828   | rs138191773 | rs138414234 | rs138591554 | rs138770460 | rs138957616 | rs139155492 | rs139355991 |
| rs1379871   | rs138191809 | rs138420028 | rs138595256 | rs138771    | rs138958276 | rs139156536 | rs139356207 |
| rs137991431 | rs1381928   | rs138420351 | rs138602842 | rs138777    | rs138958811 | rs139157021 | rs1393578   |
| rs137993948 | rs138194593 | rs1384236   | rs138607350 | rs138778943 | rs138962052 | rs139157944 | rs139368489 |
| rs137994137 | rs138196264 | rs138423884 | rs1386075   | rs138780918 | rs1389663   | rs139162753 | rs139371    |
| rs137997194 | rs138204164 | rs138425259 | rs138610068 | rs138788    | rs138973557 | rs139164185 | rs139374    |
| rs138004030 | rs138213197 | rs138426338 | rs1386119   | rs138788250 | rs1389742   | rs1391659   | rs139380    |
| rs138009610 | rs138214306 | rs138428123 | rs138612106 | rs138793296 | rs138977514 | rs139168847 | rs1393824   |
| rs138014257 | rs138216499 | rs138430382 | rs138616686 | rs138796740 | rs138978821 | rs139178017 | rs139384    |
| rs138014720 | rs138218528 | rs138436155 | rs138621699 | rs138804487 | rs1389799   | rs1391790   | rs1393840   |
| rs138015091 | rs138222355 | rs138440928 | rs138625771 | 3           | rs138981058 | rs139192229 | rs139385870 |
| rs138017112 | rs138226373 | rs138446732 | rs138628047 | rs138804614 | rs138983180 | rs139196246 | rs139386986 |
| rs138024639 | rs1382358   | rs138449027 | rs138635727 | rs138808037 | rs138984909 | rs139197261 | rs139395    |
| rs1380294   | rs138243320 | rs138453996 | rs138636117 | rs138809270 | rs138987090 | rs139197649 | rs139402    |
| rs138038919 | rs1382470   | rs1384590   | rs138641402 | rs1388100   | rs138987744 | rs139199585 | rs139407    |
| rs138042437 | rs1382568   | rs1384598   | rs138643143 | rs138811446 | rs138994828 | rs139203625 | rs1394088   |
| rs138044103 | rs138257199 | rs1384660   | rs138643189 | rs138818878 | rs1389976   | rs139204327 | rs1394125   |
| rs138044297 | rs138259061 | rs138466039 | rs138645114 | rs1388242   | rs138998340 | rs139213493 | rs139414522 |
| rs138045331 | rs138263    | rs1384687   | rs138645938 | rs1388251   | rs1389993   | rs1392140   | rs139418552 |
| rs138049    | rs138267314 | rs138468809 | rs138647241 | rs138828258 | rs139012450 | rs139214174 | rs139420    |
| rs138050288 | rs138267591 | rs138472821 | rs138650910 | rs1388295   | rs139012944 | rs139214349 | rs139424    |
| rs138052480 | rs138271349 | rs138475089 | rs13866     | rs138832179 | rs139016349 | rs139215025 | rs139424826 |
| rs138053699 | rs138273386 | rs1384781   | rs1386622   | rs138834    | rs139025277 | rs139215104 | rs139425113 |
| rs138056327 | rs138273782 | rs138483078 | rs138662258 | rs138837919 | rs139025869 | rs139224132 | rs139427417 |
| rs138059525 | rs138274479 | rs138484388 | rs1386623   | rs138841053 | rs139028709 | rs139226993 | rs139429176 |

|             |             |             |             |             |             |             |             |
|-------------|-------------|-------------|-------------|-------------|-------------|-------------|-------------|
| rs139434818 | rs139643250 | rs139878170 | rs1400745   | rs140244541 | rs140473396 | rs140668749 | rs140908948 |
| rs139435405 | rs139644567 | rs139879640 | rs140079792 | rs1402538   | rs140480140 | rs140668832 | rs1409123   |
| rs139438618 | rs1396514   | rs139880002 | rs140081212 | rs140254647 | rs140484951 | rs140676308 | rs140914107 |
| rs139441335 | rs1396515   | rs139884001 | rs140082972 | rs140262548 | rs140486316 | rs1406778   | rs140914450 |
| rs139441768 | rs1396517   | rs139887111 | rs1400867   | rs140267842 | rs140488081 | rs140677890 | rs1409158   |
| rs139446049 | rs1396609   | rs1398899   | rs1400868   | rs140271614 | rs140491239 | rs140680370 | rs140916001 |
| rs1394461   | rs139675748 | rs139892606 | rs140087759 | rs140272046 | rs140496    | rs140681455 | rs140920627 |
| rs139447106 | rs139681378 | rs139895727 | rs140088379 | rs140272884 | rs140498234 | rs140688232 | rs140924844 |
| rs1394491   | rs139681633 | rs139896    | rs140088599 | rs140273453 | rs140498714 | rs1406948   | rs1409338   |
| rs139453187 | rs1396836   | rs139897186 | rs140089442 | rs140278703 | rs1405      | rs140696582 | rs140934622 |
| rs139459946 | rs139689864 | rs139898952 | rs140089781 | rs1402796   | rs140501712 | rs1406967   | rs140935700 |
| rs139460294 | rs139695917 | rs139900206 | rs140091    | rs140281723 | rs1405024   | rs1406982   | rs140936696 |
| rs1394678   | rs139696728 | rs139901282 | rs140092241 | rs1402837   | rs140502984 | rs140701484 | rs1409379   |
| rs139470886 | rs139699952 | rs139906208 | rs1400974   | rs1402860   | rs140505938 | rs1407040   | rs140945396 |
| rs139472    | rs139703184 | rs139906758 | rs140099016 | rs140288    | rs140507754 | rs140707533 | rs140948272 |
| rs139472942 | rs139703972 | rs139910405 | rs140102162 | rs140291958 | rs140508453 | rs140708629 | rs140948517 |
| rs139473150 | rs139707092 | rs139911    | rs140104536 | rs140294987 | rs140509440 | rs140711597 | rs140953793 |
| rs139474987 | rs139711323 | rs139911703 | rs140104968 | rs140295727 | rs1405108   | rs140713122 | rs140959946 |
| rs139480376 | rs139711584 | rs139913    | rs140107293 | rs140297755 | rs1405130   | rs140721383 | rs140962713 |
| rs139481    | rs139713000 | rs139915396 | rs140108497 | rs1402989   | rs140520944 | rs1407243   | rs140966444 |
| rs139487692 | rs139719552 | rs139915535 | 0           | rs140302625 | rs140522    | rs1407256   | rs140970962 |
| rs1394877   | rs139727704 | rs139917442 | rs140120    | rs140302846 | rs140522418 | rs140727637 | rs140976226 |
| rs1394879   | rs139730988 | rs1399180   | rs140126992 | rs140307022 | rs1405238   | rs140733155 | rs1409818   |
| rs139491786 | rs1397318   | rs139919    | rs140130028 | rs140312320 | rs140526216 | rs140740457 | rs140983998 |
| rs139496    | rs139735451 | rs139919599 | rs1401327   | rs1403155   | rs140529657 | rs140756892 | rs140991990 |
| rs139497    | rs139735807 | rs139920    | rs140133294 | rs140316257 | rs140543491 | rs140760578 | rs140999406 |
| rs139497546 | rs139739387 | rs139921635 | rs140135    | rs1403174   | rs140545087 | rs140767284 | rs1410054   |
| rs139497601 | rs1397427   | rs139932136 | rs140142103 | rs140326681 | rs140546855 | rs1407855   | rs1410071   |
| rs139498    | rs139744105 | rs139939228 | rs140142658 | rs140329088 | rs1405552   | rs1408      | rs141007801 |
| rs139499211 | rs139745911 | rs139939994 | rs1401444   | rs140330585 | rs140557441 | rs140802894 | rs141008923 |
| rs1394998   | rs139746351 | rs139945697 | rs140144628 | rs140334114 | rs140564516 | rs140814701 | rs141012826 |
| rs1395      | rs139757732 | rs139948644 | rs1401454   | rs140336684 | rs140567266 | rs140817150 | rs141015398 |
| rs1395221   | rs1397610   | rs139952834 | rs140150    | rs140339215 | rs14057     | rs140817157 | rs141016381 |
| rs139525508 | rs139761834 | rs139953331 | rs140152038 | rs140348140 | rs140570886 | rs140820592 | rs141030989 |
| rs139528938 | rs139763690 | rs139954761 | rs140159717 | rs140355542 | rs140572498 | rs1408221   | rs141043717 |
| rs139530473 | rs1397764   | rs1399562   | rs140164052 | rs140355816 | rs1405747   | rs1408224   | rs141046527 |
| rs139531404 | rs139777717 | rs139960758 | rs1401735   | rs140357247 | rs140574883 | rs140824606 | rs1410492   |
| rs1395360   | rs139784759 | rs139961185 | rs140174    | rs140357883 | rs140578741 | rs140824699 | rs141050978 |
| rs139537302 | rs139789464 | rs139963642 | rs140177540 | rs140364877 | rs140581634 | rs140825531 | rs141052845 |
| rs139542826 | rs1397899   | rs139967528 | rs140179402 | rs140367586 | rs140581697 | rs1408270   | rs141053179 |
| rs1395455   | rs139790892 | rs139974673 | rs1401795   | rs140369217 | rs140582693 | rs1408272   | rs141060172 |
| rs139547629 | rs139791219 | rs139978687 | rs1401796   | rs1403694   | rs1405833   | rs1408284   | rs141062196 |
| rs139550538 | rs139795227 | rs139978857 | rs140179699 | rs140371183 | rs140584594 | rs140830767 | rs1410656   |
| rs139551207 | rs1398060   | rs139980871 | rs140185670 | rs140371629 | rs1405876   | rs1408345   | rs141066394 |
| rs139557015 | rs139811700 | rs139989095 | rs140185678 | rs1403767   | rs140588099 | rs140840556 | rs141072786 |
| rs139561776 | rs139814429 | rs139989857 | rs140185879 | rs140386498 | rs140588606 | rs1408416   | rs141078219 |
| rs139562989 | rs1398148   | rs139996880 | rs1401884   | rs140395831 | rs140594952 | rs1408430   | rs141084774 |
| rs139563996 | rs1398217   | rs140000161 | rs140189131 | rs140397066 | rs140596460 | rs140843301 | rs141086701 |
| rs139571703 | rs139828053 | rs140002913 | rs140190628 | rs140402167 | rs140604942 | rs140849564 | rs141089639 |
| rs139574809 | rs139829677 | rs140003438 | rs140191063 | rs1404098   | rs140607780 | rs140850326 | rs141094656 |
| rs139582054 | rs139832438 | rs140018774 | rs140195698 | rs140410685 | rs140608390 | rs140855736 | rs1410986   |
| rs139596721 | rs1398346   | rs1400190   | rs140198067 | rs1404154   | rs140613174 | rs1408579   | rs1410996   |
| rs139603701 | rs139840563 | rs140019196 | rs1401982   | rs140418154 | rs140620086 | rs140858719 | rs1411017   |
| rs139604259 | rs139846391 | rs140026735 | rs1401999   | rs140426714 | rs1406225   | rs140865314 | rs141115006 |
| rs1396046   | rs139847855 | rs1400283   | rs140201358 | rs140429100 | rs140625215 | rs140867372 | rs1411153   |
| rs139606545 | rs139850091 | rs140031044 | rs1402025   | rs1404300   | rs140628616 | rs140867630 | rs141116113 |
| rs139612538 | rs139851768 | rs140032935 | rs1402121   | rs140436199 | rs140645847 | rs140868651 | rs141119689 |
| rs139612658 | rs139855605 | rs1400362   | rs140216208 | rs140439280 | rs140646675 | rs140869992 | rs1411262   |
| rs1396141   | rs139858043 | rs1400482   | rs140218129 | rs140440467 | rs140647145 | rs140874911 | rs141126950 |
| rs1396190   | rs1398607   | rs140054334 | rs140220748 | rs1404417   | rs140647181 | rs140876547 | rs141128804 |
| rs13962     | rs139860835 | rs140056884 | rs140221307 | rs140446749 | rs140647239 | rs1408799   | rs141133926 |
| rs1396206   | rs139862824 | rs140058837 | rs140221313 | rs140448673 | rs140651163 | rs1408814   | rs1411350   |
| rs139629585 | rs1398651   | rs140064750 | rs140222672 | rs140450540 | rs140654574 | rs140884840 | rs1411424   |
| rs139630683 | rs139866833 | rs140068132 | rs140224167 | rs1404549   | rs140658666 | rs140887381 | rs1411431   |
| rs139634939 | rs139868495 | rs140068907 | rs140239378 | rs140456847 | rs140663152 | rs140893634 | rs1411432   |
| rs139636218 | rs139874813 | rs140072408 | rs1402398   | rs140466045 | rs140664623 | rs140902008 | rs141143931 |
| rs139641769 | rs139876400 | rs140074    | rs140242150 | rs140471203 | rs140664762 | rs140907835 | rs141147061 |

|             |             |             |             |             |             |             |             |
|-------------|-------------|-------------|-------------|-------------|-------------|-------------|-------------|
| rs1411478   | rs141405779 | rs1416218   | rs1418752   | rs1420601   | rs142252570 | rs1424760   | rs142696785 |
| rs141152635 | rs141410014 | rs141622900 | rs141876325 | rs1420607   | rs142261172 | rs142483589 | rs142698558 |
| rs141154688 | rs141413113 | rs141625685 | rs141884613 | rs142065594 | rs1422673   | rs1424864   | rs142700748 |
| rs141158222 | rs141413202 | rs141627694 | rs141885450 | rs142072330 | rs142267802 | rs142488468 | rs142702217 |
| rs141160611 | rs1414154   | rs1416288   | rs141885537 | rs142076278 | rs142274555 | rs142493909 | rs1427027   |
| rs141161671 | rs141415719 | rs141635364 | rs141887296 | rs1420791   | rs142276437 | rs142499028 | rs1427039   |
| rs141165119 | rs141424017 | rs141640975 | rs1418884   | rs142079905 | rs142278384 | rs142500391 | rs1427041   |
| rs141166527 | rs141428049 | rs141644443 | rs141889567 | rs142085340 | rs1422798   | rs142502288 | rs142706617 |
| rs141173114 | rs141428740 | rs14165     | rs141891247 | rs142088680 | rs142286129 | rs142503022 | rs142708984 |
| rs141174645 | rs141430271 | rs141651106 | rs141892754 | rs142092405 | rs142286142 | rs142503704 | rs142710267 |
| rs141175086 | rs141440048 | rs141651520 | rs141892937 | rs142093111 | rs142288236 | rs1425053   | rs142711513 |
| rs141190925 | rs141441332 | rs141661483 | rs141900298 | rs142093337 | rs1423056   | rs142505866 | rs1427200   |
| rs141207816 | rs141447235 | rs141663665 | rs141901413 | rs142094630 | rs1423096   | rs142508281 | rs142720800 |
| rs141208451 | rs1414506   | rs1416685   | rs141903485 | rs142097791 | rs142315514 | rs142515962 | rs142723961 |
| rs141212865 | rs1414517   | rs141669515 | rs141903557 | rs1420993   | rs142316985 | rs142516820 | rs1427298   |
| rs141216986 | rs141455341 | rs1416706   | rs141908043 | rs1420996   | rs142324371 | rs142518269 | rs142736021 |
| rs141219707 | rs141463285 | rs141678366 | rs141910407 | rs142101835 | rs1423269   | rs142520578 | rs142739979 |
| rs1412234   | rs1414660   | rs141682172 | rs1419114   | rs142105922 | rs142328051 | rs1425252   | rs1427407   |
| rs1412239   | rs141469619 | rs1416822   | rs141917145 | rs1421085   | rs1423352   | rs142529006 | rs142740991 |
| rs141232332 | rs141474441 | rs141691178 | rs141925739 | rs142108859 | rs142336524 | rs142530265 | rs142744034 |
| rs141232514 | rs141478056 | rs141704717 | rs141930488 | rs142111559 | rs142338804 | rs142536810 | rs1427445   |
| rs1412337   | rs141490673 | rs141715080 | rs1419311   | rs142117234 | rs14234     | rs142536918 | rs142747148 |
| rs141234028 | rs141490781 | rs1417210   | rs141936164 | rs142118720 | rs142343672 | rs142550007 | rs1427499   |
| rs141236451 | rs1414909   | rs141724389 | rs1419392   | rs142122062 | rs142343894 | rs142550358 | rs142750344 |
| rs141237278 | rs141491217 | rs141724470 | rs141942982 | rs142126734 | rs142344547 | rs1425522   | rs1427506   |
| rs141243103 | rs141493439 | rs141724981 | rs141949189 | rs1421304   | rs142346759 | rs142552223 | rs142754383 |
| rs1412444   | rs141498473 | rs141729694 | rs141949220 | rs142130958 | rs14235     | rs1425598   | rs142754384 |
| rs1412445   | rs141498524 | rs141737681 | rs141952974 | rs1421334   | rs142351272 | rs142564732 | rs142754737 |
| rs141260127 | rs141498685 | rs141738059 | rs141954845 | rs142138455 | rs1423516   | rs142568031 | rs142756290 |
| rs1412633   | rs141498873 | rs141743914 | rs141960938 | rs1421418   | rs1423527   | rs142576422 | rs1427593   |
| rs141265106 | rs141500328 | rs1417488   | rs141961318 | rs142143628 | rs142367408 | rs142583374 | rs1427604   |
| rs141270935 | rs141501074 | rs141749350 | rs141962260 | rs142151479 | rs142368394 | rs142586351 | rs142765183 |
| rs1412710   | rs1415069   | rs141751376 | rs141962517 | rs142151894 | rs142385484 | rs1425869   | rs142765674 |
| rs141274831 | rs141509569 | rs141753469 | rs141968321 | rs1421567   | rs142395395 | rs1425872   | rs1427669   |
| rs141279119 | rs141510569 | rs141759085 | rs141973904 | rs142158911 | rs1424077   | rs142587718 | rs142769246 |
| rs1412829   | rs141512860 | rs141760764 | rs141977720 | rs142161979 | rs142410722 | rs142589036 | rs142770866 |
| rs1412834   | rs141514755 | rs1417665   | rs141979279 | rs142163225 | rs1424114   | rs142592088 | rs142771187 |
| rs1412957   | rs141515844 | rs141767077 | rs141979783 | rs142169094 | rs142412517 | rs142592509 | rs142773536 |
| rs141297994 | rs141518190 | rs141767645 | rs1419856   | rs142174523 | rs142414016 | rs142601889 | rs142773928 |
| rs141301223 | rs141520461 | rs141772609 | rs1419859   | rs142177694 | rs1424144   | rs142601917 | rs142780001 |
| rs141303173 | rs1415212   | rs141773786 | rs1419881   | rs142177774 | rs142415097 | rs142602868 | rs1427829   |
| rs141306206 | rs141521721 | rs141783576 | rs141990161 | rs142180737 | rs142416231 | rs142603322 | rs142783062 |
| rs141308595 | rs1415221   | rs1417922   | rs141992399 | rs142183293 | rs142419423 | rs142607265 | rs142786982 |
| rs141310123 | rs1415259   | rs141793746 | rs1419980   | rs142186557 | rs1424233   | rs1426107   | rs142787485 |
| rs1413119   | rs141526427 | rs1418004   | rs141999530 | rs142186653 | rs1424241   | rs142613662 | rs142790902 |
| rs141314120 | rs1415293   | rs141807517 | rs142003765 | rs142193658 | rs142425863 | rs142618987 | rs142798523 |
| rs141322890 | rs141530233 | rs141811210 | rs142004400 | rs142198257 | rs142427110 | rs142626656 | rs142799378 |
| rs141325867 | rs141536087 | rs141819830 | rs142005327 | rs142200419 | rs142436749 | rs142627190 | rs142808087 |
| rs141328146 | rs1415364   | rs141826247 | rs142008161 | rs142201367 | rs142439069 | rs142627977 | rs142808708 |
| rs1413299   | rs1415451   | rs141828605 | rs142008911 | rs142204688 | rs142444269 | rs142628781 | rs1428121   |
| rs141332218 | rs141545107 | rs141829833 | rs1420098   | rs1422067   | rs142444346 | rs1426371   | rs142815441 |
| rs141332233 | rs141547796 | rs1418333   | rs1420101   | rs1422070   | rs142449193 | rs142644146 | rs142815467 |
| rs141332418 | rs141550222 | rs1418334   | rs1420103   | rs142209628 | rs142449754 | rs142647267 | rs142818680 |
| rs1413422   | rs141554673 | rs141834426 | rs1420106   | rs142209667 | rs142450006 | rs142647938 | rs142823282 |
| rs141342723 | rs1415701   | rs1418351   | rs142014154 | rs142214173 | rs142453120 | rs142651386 | rs142827533 |
| rs141343442 | rs141573810 | rs141839244 | rs142014757 | rs142215530 | rs142456437 | rs142653378 | rs142832080 |
| rs141344917 | rs141577316 | rs14184     | rs142016905 | rs1422189   | rs142456823 | rs1426619   | rs142834685 |
| rs1413536   | rs1415802   | rs141842046 | rs142020459 | rs1422191   | rs142457531 | rs1426652   | rs142838100 |
| rs1413573   | rs141583966 | rs141845046 | rs142021700 | rs1422192   | rs142460927 | rs1426654   | rs142844348 |
| rs141360540 | rs141586924 | rs141853578 | rs142024445 | rs142220572 | rs142461330 | rs142665966 | rs142846886 |
| rs141361278 | rs141588480 | rs141854486 | rs1420253   | rs142226072 | rs142462188 | rs142670696 | rs142864856 |
| rs141365045 | rs141600123 | rs1418549   | rs142032045 | rs1422278   | rs1424636   | rs142673685 | rs142865135 |
| rs141379002 | rs141600568 | rs141860517 | rs142034933 | rs1422279   | rs142463603 | rs142674134 | rs142872577 |
| rs141379009 | rs141601939 | rs141862746 | rs1420466   | rs142228984 | rs1424638   | rs142680548 | rs142874124 |
| rs141379129 | rs141604861 | rs141864196 | rs1420476   | rs142239370 | rs142469003 | rs142686179 | rs142874192 |
| rs141385558 | rs141610938 | rs1418652   | rs142050326 | rs142242702 | rs142469837 | rs142688505 | rs142874203 |
| rs141389097 | rs141620750 | rs141870697 | rs142058842 | rs142246099 | rs142472947 | rs142695226 | rs142876825 |

|             |             |             |             |             |             |             |             |
|-------------|-------------|-------------|-------------|-------------|-------------|-------------|-------------|
| rs142890050 | rs143082869 | rs143231463 | rs143407796 | rs143653036 | rs143858253 | rs144067939 | rs144232229 |
| rs142893386 | rs143083071 | rs143233814 | rs143409503 | rs143654430 | rs143860577 | rs1440703   | rs1442330   |
| rs142895115 | rs143083812 | rs143243230 | rs143411887 | rs143661929 | rs143864773 | rs144073138 | rs144233266 |
| rs1428968   | rs143088266 | rs143244591 | rs1434206   | rs143665477 | rs1438660   | rs14408     | rs144241592 |
| rs142900233 | rs143092959 | rs1432457   | rs143423902 | rs143665849 | rs1438673   | rs1440802   | rs144242131 |
| rs142903734 | rs143093668 | rs143246821 | rs143424675 | rs143665886 | rs1438682   | rs144080386 | rs144245804 |
| rs1429139   | rs143094271 | rs143251085 | rs143425049 | rs143668036 | rs143875052 | rs144084486 | rs144247761 |
| rs1429141   | rs143106299 | rs1432559   | rs143427404 | rs143668283 | rs143879787 | rs144089176 | rs144250387 |
| rs142916219 | rs1431071   | rs143257534 | rs1434282   | rs143669790 | rs143887446 | rs144092339 | rs144251460 |
| rs142927863 | rs1431093   | rs1432639   | rs143430880 | rs143669862 | rs1438896   | rs1440930   | rs144254157 |
| rs142938197 | rs143111788 | rs143264468 | rs143432496 | rs143670081 | rs143894582 | rs144094653 | rs144256094 |
| rs142945276 | rs143112823 | rs143265819 | rs143437112 | rs143674995 | rs143896995 | rs1440978   | rs144261139 |
| rs142953140 | rs143113301 | rs1432679   | rs143439747 | rs143683645 | rs1439112   | rs144097927 | rs144261754 |
| rs142958146 | rs1431181   | rs1432688   | rs143442432 | rs1436904   | rs143916866 | rs144098432 | rs144270286 |
| rs142963458 | rs143118162 | rs143269342 | rs143448563 | rs143691392 | rs143918452 | rs144100226 | rs144284241 |
| rs142965311 | rs143118954 | rs143270813 | rs1434513   | rs143692029 | rs1439211   | rs144101543 | rs1442875   |
| rs142971131 | rs1431196   | rs143273199 | rs143456058 | rs1436931   | rs1439253   | rs1441043   | rs1442877   |
| rs142972412 | rs143119709 | rs143273561 | rs143458892 | rs143699161 | rs143925775 | rs144109344 | rs1442883   |
| rs142973694 | rs143119940 | rs143277812 | rs143459388 | rs143699489 | rs143926538 | rs144109569 | rs144288546 |
| rs142979264 | rs143122441 | rs143282724 | rs143461983 | rs143699509 | rs143928419 | rs144110170 | rs144290781 |
| rs142980456 | rs143123127 | rs143283473 | rs1434630   | rs143702978 | rs1439287   | rs14411102  | rs144293483 |
| rs142981556 | rs143125561 | rs143283559 | rs143465123 | rs1437055   | rs1439321   | rs144115184 | rs144296676 |
| rs1429891   | rs143130444 | rs143288026 | rs143474489 | rs143705939 | rs143933372 | rs1441165   | rs144299400 |
| rs142989458 | rs143132975 | rs143289410 | rs143474978 | rs143709408 | rs143934543 | rs1441169   | rs144301783 |
| rs142990325 | rs143138242 | rs143290289 | rs143475242 | rs143709973 | rs143937055 | rs144120533 | rs144304366 |
| rs142992315 | rs14314     | rs143290435 | rs143477080 | rs143721880 | rs143942614 | rs1441207   | rs144309021 |
| rs142992586 | rs143141511 | rs143290532 | rs143478537 | rs143722364 | rs143951742 | rs144124553 | rs144311425 |
| rs142997491 | rs143145866 | rs143293600 | rs143490035 | rs143733871 | rs143955190 | rs1441264   | rs144311893 |
| rs142997686 | rs143146694 | rs1432952   | rs143504748 | rs1437370   | rs1439656   | rs144126567 | rs144314390 |
| rs142998071 | rs143149578 | rs143296685 | rs143524414 | rs143737784 | rs143965725 | rs144127155 | rs144317085 |
| rs143002957 | rs1431545   | rs143297173 | rs143528679 | rs1437394   | rs143968955 | rs144131194 | rs144319869 |
| rs143003898 | rs143155169 | rs143303199 | rs143532828 | rs1437396   | rs143975070 | rs1441357   | rs144322196 |
| rs1430039   | rs1431659   | rs143312104 | rs143547391 | rs143741106 | rs143981324 | rs1441358   | rs144328717 |
| rs1430055   | rs143167197 | rs143312364 | rs1435479   | rs143741275 | rs143981846 | rs144136543 | rs144336753 |
| rs1430065   | rs143175787 | rs1433130   | rs143554274 | rs143743568 | rs143985986 | rs144137329 | rs144338997 |
| rs143008696 | rs143178398 | rs1433210   | rs143554698 | rs143745938 | rs14399     | rs144141547 | rs144339224 |
| rs143010088 | rs143178528 | rs143321598 | rs143558304 | rs143750586 | rs143993772 | rs144144855 | rs1443438   |
| rs143011636 | rs1431819   | rs143321615 | rs1435672   | rs143755874 | rs1439965   | rs144147445 | rs144344009 |
| rs143012756 | rs143186028 | rs143325653 | rs143570368 | rs143756010 | rs144001526 | rs144147880 | rs144344067 |
| rs1430191   | rs143189023 | rs143326447 | rs143571077 | rs143756708 | rs144005882 | rs144148436 | rs144346736 |
| rs1430193   | rs143190635 | rs1433265   | rs143573049 | rs143759545 | rs1440063   | rs144149795 | rs1443512   |
| rs143020224 | rs143190905 | rs143329057 | rs1435741   | rs143765411 | rs144008029 | rs144158419 | rs144352333 |
| rs1430205   | rs143193096 | rs1433309   | rs1435742   | rs1437683   | rs144009594 | rs144158892 | rs144360241 |
| rs143021546 | rs1431965   | rs143331139 | rs143581991 | rs143768697 | rs144017103 | rs144171632 | rs144360277 |
| rs143024324 | rs1432007   | rs143332484 | rs143583842 | rs143773045 | rs144018888 | rs144173    | rs144360625 |
| rs143029752 | rs143200968 | rs143333049 | rs1435867   | rs143773583 | rs144019485 | rs1441756   | rs144363312 |
| rs143032062 | rs143201630 | rs143334143 | rs143590040 | rs143778001 | rs144023540 | rs1441759   | rs144364340 |
| rs143034248 | rs143203352 | rs143334396 | rs143593369 | rs1437842   | rs144026674 | rs1441770   | rs144366639 |
| rs1430346   | rs1432052   | rs143335233 | rs143599985 | rs143793852 | rs1440277   | rs1441778   | rs144369129 |
| rs143035740 | rs143205344 | rs1433375   | rs143602646 | rs143794540 | rs14403     | rs144184641 | rs144369599 |
| rs143038218 | rs1432054   | rs143344227 | rs1436109   | rs143796540 | rs144030363 | rs1441850   | rs144370238 |
| rs143043662 | rs143210163 | rs143351962 | rs143611734 | rs1437971   | rs144033177 | rs144188464 | rs144373461 |
| rs143048919 | rs143211693 | rs143353512 | rs143612100 | rs143800403 | rs144033370 | rs1441911   | rs144373891 |
| rs143049324 | rs143212632 | rs1433578   | rs1436138   | rs1438026   | rs1440371   | rs144198753 | rs1443749   |
| rs143049891 | rs143213207 | rs143360647 | rs143614067 | rs143811622 | rs1440372   | rs1442      | rs144374908 |
| rs143055445 | rs1432133   | rs143361672 | rs143614383 | rs143812851 | rs1440374   | rs1442029   | rs1443750   |
| rs143058637 | rs143214539 | rs143365361 | rs143615986 | rs1438153   | rs1440411   | rs144204502 | rs144376234 |
| rs1430609   | rs143215670 | rs143365597 | rs1436206   | rs143819087 | rs144041302 | rs1442118   | rs144376466 |
| rs1430611   | rs143219228 | rs143370804 | rs143626010 | rs143825439 | rs144041441 | rs144215134 | rs144387335 |
| rs143063381 | rs143219430 | rs143373756 | rs1436344   | rs143830108 | rs144042126 | rs144216645 | rs1443914   |
| rs143073646 | rs143221246 | rs143378367 | rs143634417 | rs1438356   | rs144045260 | rs144216834 | rs144391488 |
| rs1430740   | rs1432262   | rs143378550 | rs1436345   | rs143836544 | rs1440476   | rs1442190   | rs1443926   |
| rs1430742   | rs143228326 | rs143379756 | rs1436348   | rs143840904 | rs144048300 | rs144219190 | rs144393202 |
| rs143076454 | rs1432295   | rs143383    | rs1436351   | rs143843429 | rs144052331 | rs144223004 | rs144398877 |
| rs143077495 | rs1432296   | rs143384    | rs143636430 | rs143845082 | rs144053467 | rs144225905 | rs144403523 |
| rs1430780   | rs143229677 | rs143393480 | rs143638193 | rs143846972 | rs144057587 | rs144226500 | rs144406819 |
| rs1430797   | rs14323     | rs143399767 | rs1436501   | rs1438479   | rs1440581   | rs144229896 | rs144412371 |

|             |             |             |             |             |             |             |             |
|-------------|-------------|-------------|-------------|-------------|-------------|-------------|-------------|
| rs144417742 | rs144647926 | rs1448602   | rs145029810 | rs145214406 | rs145470632 | rs1456297   | rs145908530 |
| rs144428416 | rs144648477 | rs144861591 | rs145037750 | rs145215398 | rs145470851 | rs1456315   | rs145910606 |
| rs144432213 | rs144649399 | rs144864205 | rs145043452 | rs1452201   | rs145477191 | rs145644385 | rs1459180   |
| rs144433536 | rs1446516   | rs144869587 | rs145044531 | rs145224266 | rs1454776   | rs145646262 | rs1459192   |
| rs144434404 | rs144658219 | rs144870397 | rs145044782 | rs145225702 | rs145482150 | rs145648894 | rs145919520 |
| rs144436375 | rs1446585   | rs144870624 | rs145048495 | rs145225781 | rs1454836   | rs1456522   | rs1459219   |
| rs144438880 | rs144660248 | rs144874692 | rs145049847 | rs145226407 | rs145485557 | rs145658364 | rs145925847 |
| rs144442782 | rs144662465 | rs144875739 | rs1450522   | rs145236316 | rs145489195 | rs145662369 | rs145929329 |
| rs144443116 | rs144667340 | rs144876213 | rs145054295 | rs145242567 | rs145489304 | rs145669495 | rs145931056 |
| rs144444211 | rs144667737 | rs144878061 | rs145056736 | rs145246577 | rs1454934   | rs145678014 | rs1459385   |
| rs144447022 | rs144670711 | rs144878971 | rs145057384 | rs145249240 | rs1454984   | rs145682704 | rs145944004 |
| rs144449115 | rs144673025 | rs144887234 | rs145060708 | rs145258459 | rs145498856 | rs1456893   | rs145945174 |
| rs144461822 | rs144691710 | rs1448903   | rs145063132 | rs145259294 | rs145501595 | rs1456896   | rs145946844 |
| rs144467962 | rs144699115 | rs1448938   | rs145069606 | rs1452628   | rs145503185 | rs1456906   | rs145947882 |
| rs144474740 | rs144703049 | rs144894688 | rs1450741   | rs145267792 | rs145504297 | rs145697747 | rs145952040 |
| rs144475339 | rs144706112 | rs144898130 | rs145076406 | rs145268310 | rs145510090 | rs1456988   | rs145952310 |
| rs1444766   | rs144706539 | rs144899207 | rs145076523 | rs145269503 | rs1455114   | rs1457115   | rs145954018 |
| rs1444768   | rs144713920 | rs1449012   | rs145077631 | rs145273332 | rs145514852 | rs145718079 | rs145954970 |
| rs144477852 | rs144714606 | rs144902713 | rs1450786   | rs145273360 | rs145517055 | rs145719494 | rs145955280 |
| rs1444782   | rs144721045 | rs144903947 | rs1450807   | rs145276599 | rs145527611 | rs1457231   | rs145959269 |
| rs144478515 | rs144721899 | rs144911693 | rs145081564 | rs1452787   | rs145530718 | rs145725232 | rs145965241 |
| rs1444789   | rs1447295   | rs144915398 | rs1450832   | rs1452789   | rs145530953 | rs1457257   | rs145965565 |
| rs1444849   | rs144731721 | rs144916876 | rs1450833   | rs145279960 | rs1455343   | rs145726161 | rs145966800 |
| rs144488974 | rs144733372 | rs144918786 | rs1450851   | rs1452822   | rs1455344   | rs145729347 | rs14597     |
| rs1445011   | rs144736172 | rs144919949 | rs145085227 | rs145282902 | rs1455349   | rs145730801 | rs145976521 |
| rs144504271 | rs144737537 | rs1449245   | rs145085279 | rs145283874 | rs1455350   | rs145734812 | rs145976573 |
| rs144507626 | rs144738419 | rs144926207 | rs145090930 | rs145287362 | rs145535174 | rs145743542 | rs145979116 |
| rs144511092 | rs144740330 | rs1449263   | rs145096717 | rs1452909   | rs145535796 | rs1457436   | rs145980981 |
| rs144515162 | rs144741369 | rs144926613 | rs145097508 | rs145294512 | rs145541733 | rs145743887 | rs145981104 |
| rs1445155   | rs144744357 | rs144928556 | rs145104523 | rs1452987   | rs145542470 | rs145746079 | rs145986476 |
| rs1445171   | rs1447523   | rs144933108 | rs145106904 | rs1452991   | rs1455434   | rs1457489   | rs145987658 |
| rs144517871 | rs144753588 | rs1449348   | rs1451077   | rs1453007   | rs145546625 | rs1457532   | rs145987962 |
| rs144527861 | rs144755950 | rs1449386   | rs145108385 | rs145308728 | rs145547914 | rs145761614 | rs145990041 |
| rs144528474 | rs144762289 | rs1449403   | rs1451109   | rs145333308 | rs145548600 | rs145764789 | rs146008976 |
| rs144532965 | rs144763902 | rs144942570 | rs1451192   | rs145334570 | rs145548733 | rs145766673 | rs146009840 |
| rs144538541 | rs144765000 | rs144942718 | rs1451193   | rs145339349 | rs145554793 | rs145775785 | rs146024367 |
| rs144542704 | rs144776264 | rs144942726 | rs145119400 | rs145343339 | rs145556679 | rs145778816 | rs146030699 |
| rs1445591   | rs144780051 | rs144943143 | rs1451240   | rs145350287 | rs145562694 | rs145781730 | rs146030737 |
| rs144562456 | rs144787122 | rs1449435   | rs145125135 | rs145358377 | rs145563085 | rs145787127 | rs146033545 |
| rs144563201 | rs144788267 | rs1449544   | rs145126703 | rs145363329 | rs145564694 | rs1457908   | rs146046988 |
| rs1445649   | rs144789148 | rs144959042 | rs145127301 | rs145364311 | rs145565113 | rs145793613 | rs146047330 |
| rs1445653   | rs144794875 | rs144959664 | rs1451486   | rs145364349 | rs145570960 | rs1458038   | rs146055611 |
| rs144567740 | rs1448039   | rs144961211 | rs1451488   | rs145364999 | rs145571377 | rs1458046   | rs146061372 |
| rs144573130 | rs144809193 | rs144962376 | rs1451506   | rs145365164 | rs145580088 | rs145807285 | rs1460676   |
| rs1445760   | rs1448133   | rs1449630   | rs145151767 | rs1453660   | rs145583519 | rs145812241 | rs1460678   |
| rs144578168 | rs144814361 | rs1449631   | rs145152209 | rs145367119 | rs145586115 | rs145812773 | rs146075547 |
| rs144579321 | rs1448187   | rs144965899 | rs1451533   | rs145375166 | rs145589901 | rs1458146   | rs146078716 |
| rs144579705 | rs1448190   | rs144970957 | rs145153320 | rs145375841 | rs145589976 | rs1458156   | rs1460816   |
| rs14458     | rs1448203   | rs1449727   | rs1451538   | rs1453858   | rs145590108 | rs1458247   | rs146083697 |
| rs144581120 | rs1448213   | rs144972973 | rs145158522 | rs1453873   | rs145590578 | rs145827824 | rs146086561 |
| rs144582188 | rs1448290   | rs144976070 | rs145158867 | rs145389767 | rs145593029 | rs145827860 | rs146087803 |
| rs1445866   | rs144829310 | rs144979264 | rs145161642 | rs145406238 | rs145593549 | rs145832854 | rs146091102 |
| rs144587740 | rs144830084 | rs144983009 | rs145162854 | rs145410455 | rs1455942   | rs145835664 | rs146091982 |
| rs144593359 | rs1448318   | rs144984216 | rs145163454 | rs145411783 | rs145594822 | rs145838709 | rs146092501 |
| rs144596626 | rs144832051 | rs144984465 | rs145169535 | rs1454256   | rs145598309 | rs145843487 | rs1460939   |
| rs144600858 | rs144832584 | rs144991069 | rs145171179 | rs145430844 | rs145600547 | rs145855729 | rs146095395 |
| rs144609065 | rs1448355   | rs144991356 | rs145171343 | rs145432346 | rs145601829 | rs145859971 | rs146097282 |
| rs144610116 | rs144840848 | rs144991697 | rs1451724   | rs145432915 | rs145602600 | rs145863291 | rs146099759 |
| rs144613238 | rs144843136 | rs144994089 | rs145178147 | rs145435498 | rs1456031   | rs145864106 | rs146104952 |
| rs144613541 | rs144843366 | rs144994126 | rs145184406 | rs145445141 | rs1456038   | rs145867342 | rs146109634 |
| rs144614991 | rs144843919 | rs144996521 | rs145186303 | rs145448563 | rs145605569 | rs145878042 | rs1461102   |
| rs144617947 | rs144844453 | rs145007659 | rs145188037 | rs145452708 | rs145606348 | rs145882729 | rs146110680 |
| rs144625846 | rs144847043 | rs145013566 | rs1452000   | rs145464906 | rs145607970 | rs1458831   | rs146112277 |
| rs144641731 | rs144847051 | rs145018899 | rs145204399 | rs1454687   | rs145611121 | rs145886884 | rs146121210 |
| rs144645644 | rs1448484   | rs145023077 | rs1452075   | rs145469380 | rs145613835 | rs1458979   | rs146127221 |
| rs1446468   | rs1448489   | rs1450270   | rs1452102   | rs145470028 | rs145618127 | rs145898511 | rs146128209 |
| rs144647275 | rs144851691 | rs1450271   | rs145211473 | rs145470583 | rs145629243 | rs145904381 | rs146128753 |



|             |             |             |             |             |             |             |             |
|-------------|-------------|-------------|-------------|-------------|-------------|-------------|-------------|
| rs146129930 | rs1463034   | rs146551666 | rs1467627   | rs1469921   | rs147212971 | rs147427629 | rs147642358 |
| rs146132285 | rs146306986 | rs146554560 | rs146764950 | rs146992477 | rs147215801 | rs147428040 | rs1476454   |
| rs146138775 | rs146306989 | rs1465618   | rs146771786 | rs147005258 | rs1472226   | rs147428054 | rs147647315 |
| rs146140960 | rs146309381 | rs146562173 | rs1467737   | rs1470106   | rs147224860 | rs147430042 | rs147647466 |
| rs1461503   | rs1463103   | rs146563863 | rs146776010 | rs147010904 | rs1472259   | rs147431626 | rs147649347 |
| rs1461583   | rs1463104   | rs1465685   | rs146783254 | rs147011441 | rs147225968 | rs1474348   | rs1476512   |
| rs1461584   | rs146310930 | rs1465697   | rs1467847   | rs1470121   | rs1472265   | rs1474419   | rs147652399 |
| rs146158951 | rs146311723 | rs1465702   | rs146788033 | rs1470260   | rs1472267   | rs147445198 | rs1476535   |
| rs146161311 | rs146312    | rs1465788   | rs1468102   | rs147026698 | rs1472302   | rs147445322 | rs1476569   |
| rs146163318 | rs146317210 | rs146582756 | rs146812806 | rs147028191 | rs147233090 | rs147450666 | rs147656985 |
| rs146167147 | rs146318841 | rs1465841   | rs146817970 | rs147032017 | rs1472360   | rs1474518   | rs1476570   |
| rs1461672   | rs146326248 | rs1465875   | rs146818600 | rs147032946 | rs147242034 | rs147451859 | rs1476576   |
| rs1461674   | rs146327939 | rs146587548 | rs146820337 | rs1470375   | rs147245086 | rs147453535 | rs147659883 |
| rs1461677   | rs146328612 | rs146597587 | rs1468252   | rs1470475   | rs147247472 | rs147458259 | rs147662640 |
| rs1461680   | rs146331657 | rs1466      | rs146827975 | rs147048550 | rs147253843 | rs1474698   | rs1476679   |
| rs146169233 | rs146333943 | rs146601862 | rs1468333   | rs147049568 | rs1472565   | rs147472287 | rs1476698   |
| rs1461695   | rs1463342   | rs146605626 | rs146836668 | rs147050753 | rs1472631   | rs1474754   | rs147670940 |
| rs146170154 | rs146342974 | rs146607495 | rs146851087 | rs1470516   | rs147264084 | rs147477118 | rs1476754   |
| rs146171833 | rs146354218 | rs1466118   | rs1468520   | rs147052174 | rs147268199 | rs147482218 | rs147676232 |
| rs146172211 | rs146358093 | rs146612591 | rs146853253 | rs1470545   | rs147269950 | rs1474865   | rs147678983 |
| rs1461729   | rs1463598   | rs1466181   | rs1468572   | rs147055617 | rs1472721   | rs1474920   | rs147680653 |
| rs1461741   | rs1463657   | rs146618240 | rs146859437 | rs1470560   | rs1472750   | rs1474921   | rs1476835   |
| rs146179438 | rs146368412 | rs146618443 | rs146859528 | rs1470579   | rs1472822   | rs147496940 | rs147689733 |
| rs146182298 | rs1463727   | rs1466225   | rs1468602   | rs147058474 | rs147283716 | rs147499178 | rs147694761 |
| rs146188897 | rs146374310 | rs1466226   | rs146860658 | rs147065162 | rs1472852   | rs147499485 | rs147696085 |
| rs146196583 | rs146377491 | rs146624211 | rs1468642   | rs147068659 | rs147287428 | rs147499554 | rs147697812 |
| rs1461990   | rs146378021 | rs146628426 | rs146865992 | rs147072329 | rs147301839 | rs147502994 | rs147699531 |
| rs146199923 | rs146380793 | rs146636673 | rs1468663   | rs1470764   | rs147307766 | rs1475064   | rs147701520 |
| rs146200153 | rs146381464 | rs146644295 | rs146870654 | rs147077988 | rs147310751 | rs1475065   | rs147707292 |
| rs146201400 | rs146385050 | rs146650065 | rs146871152 | rs147081589 | rs147324178 | rs147510742 | rs147707926 |
| rs146201420 | rs146390073 | rs1466535   | rs146874451 | rs1470895   | rs147324647 | rs1475120   | rs147711004 |
| rs146203232 | rs146396094 | rs146657690 | rs1468758   | rs147097402 | rs1473247   | rs1475125   | rs147711594 |
| rs146206119 | rs146396423 | rs146662075 | rs146875993 | rs147104235 | rs147327821 | rs1475130   | rs147711952 |
| rs146206942 | rs1464015   | rs1466684   | rs1468788   | rs1471093   | rs147330708 | rs147514708 | rs147719227 |
| rs146207376 | rs146402667 | rs146668528 | rs1468790   | rs147110080 | rs147333341 | rs147517486 | rs1477199   |
| rs146207734 | rs146418897 | rs146669915 | rs146879198 | rs147110934 | rs147340715 | rs147518833 | rs147720516 |
| rs146209416 | rs146421862 | rs146671954 | rs146879704 | rs147116709 | rs1473474   | rs147519028 | rs147722442 |
| rs146209479 | rs1464297   | rs1466733   | rs1468810   | rs147117699 | rs147350405 | rs147522398 | rs147725790 |
| rs146213057 | rs146433259 | rs146675384 | rs146886108 | rs147119990 | rs147352336 | rs147525344 | rs147728054 |
| rs146213062 | rs146437551 | rs146677409 | rs1468869   | rs147120681 | rs1473526   | rs147525635 | rs1477290   |
| rs1462151   | rs1464419   | rs146678232 | rs146890554 | rs147121091 | rs147355776 | rs1475267   | rs147730268 |
| rs1462163   | rs146447930 | rs1466788   | rs1468945   | rs1471212   | rs1473594   | rs147530811 | rs1477341   |
| rs146216907 | rs146447986 | rs1466802   | rs146896516 | rs147122512 | rs1473634   | rs147537141 | rs147735245 |
| rs146216988 | rs1464510   | rs146681214 | rs146898186 | rs1471251   | rs147368169 | rs147537311 | rs147739461 |
| rs146220228 | rs146458111 | rs146682150 | rs1468993   | rs147133967 | rs1473702   | rs147538848 | rs147747231 |
| rs146221974 | rs146459536 | rs1466848   | rs146901797 | rs1471403   | rs147371771 | rs147539187 | rs147751337 |
| rs146222044 | rs146464922 | rs146685629 | rs1469039   | rs147140551 | rs1473720   | rs1475417   | rs147753572 |
| rs146222776 | rs146471968 | rs1466887   | rs146906133 | rs147141470 | rs147372871 | rs147543128 | rs147755126 |
| rs146223307 | rs146471969 | rs146689548 | rs146910503 | rs147144681 | rs147375394 | rs147549871 | rs147764722 |
| rs146225865 | rs146474788 | rs146690225 | rs1469149   | rs147148763 | rs147376510 | rs1475502   | rs147765058 |
| rs1462268   | rs1464841   | rs146690913 | rs146918648 | rs147151648 | rs1473781   | rs147553474 | rs147766666 |
| rs146231194 | rs146490475 | rs146693166 | rs1469217   | rs147153202 | rs147380181 | rs1475543   | rs147767607 |
| rs1462372   | rs146497684 | rs146699004 | rs146939415 | rs1471539   | rs147387328 | rs147555597 | rs147772407 |
| rs146250839 | rs146512116 | rs1467026   | rs146948889 | rs147154109 | rs147396945 | rs1475655   | rs147786161 |
| rs146253696 | rs146513610 | rs146706984 | rs146949893 | rs147154263 | rs147399060 | rs147570790 | rs1477887   |
| rs146254843 | rs146514659 | rs146716733 | rs146950370 | rs1471633   | rs147399732 | rs1475718   | rs1477890   |
| rs146258447 | 1           | rs146717710 | rs146958176 | rs147170006 | rs1474011   | rs1475783   | rs147792504 |
| rs146261845 | rs1465160   | rs146718236 | rs146970669 | rs1471740   | rs147402310 | rs147590351 | rs147793969 |
| rs146266174 | rs146518726 | rs146723115 | rs1469713   | rs147176253 | rs147403447 | rs147598882 | rs147804508 |
| rs146268058 | rs146524044 | rs146727601 | rs146972365 | rs147176673 | rs147404945 | rs147599379 | rs147817028 |
| rs146268882 | rs1465305   | rs146746174 | rs146974314 | rs1471786   | rs1474055   | rs1476096   | rs147817069 |
| rs146278291 | rs146534110 | rs1467464   | rs146975914 | rs147188206 | rs1474107   | rs1476097   | rs1478173   |
| rs1462813   | rs1465370   | rs146750254 | rs146976071 | rs147197357 | rs147412694 | rs1476098   | rs147819275 |
| rs146287838 | rs146541367 | rs1467510   | rs146980124 | rs147202915 | rs147412900 | rs147613212 | rs147828466 |
| rs146291102 | rs146542417 | rs1467512   | rs146983744 | rs147203669 | rs147413364 | rs1476171   | rs147829649 |
| rs1462977   | rs146543016 | rs146753195 | rs146984623 | rs147204125 | rs147420422 | rs147622113 | rs147829960 |
| rs146301099 | rs146550789 | rs146754848 | rs1469908   | rs147206302 | rs147424714 | rs147640352 | rs147834269 |

|             |             |             |             |             |             |             |             |
|-------------|-------------|-------------|-------------|-------------|-------------|-------------|-------------|
| rs1478364   | rs148060340 | rs148294058 | rs148540016 | rs148742710 | rs1489502   | rs149165215 | rs149388997 |
| rs147840525 | rs148064265 | rs148297846 | rs148541866 | rs1487439   | rs148966811 | rs149168595 | rs149389640 |
| rs147846168 | rs148065054 | rs148300465 | rs148544378 | rs1487441   | rs148969528 | rs149169037 | rs149389676 |
| rs147855116 | rs148067775 | rs148303016 | rs148546399 | rs1487445   | rs1489759   | rs1491744   | rs1493914   |
| rs147856773 | rs148075685 | rs148311724 | rs148549648 | rs148750727 | rs1489760   | rs149180914 | rs1493935   |
| rs147858478 | rs148076010 | rs1483121   | rs148550456 | rs148753499 | rs1489761   | rs149183129 | rs149394327 |
| rs147859257 | rs1480795   | rs148316037 | rs148553336 | rs148753653 | rs1489762   | rs1491850   | rs149396351 |
| rs147859411 | rs148082013 | rs1483186   | rs148553452 | rs148753885 | rs1489763   | rs149187988 | rs149396823 |
| rs147859879 | rs148083940 | rs148319899 | rs1485554   | rs148753960 | rs1489765   | rs1491905   | rs149400260 |
| rs1478604   | rs148084229 | rs148323035 | rs148558396 | rs148757321 | rs148979203 | rs1491942   | rs149401382 |
| rs147861665 | rs148092711 | rs1483245   | rs148560125 | rs148758034 | rs148982377 | rs149194562 | rs149401731 |
| rs147866228 | rs148099564 | rs148328786 | rs148566631 | rs148760487 | rs148992522 | rs1491958   | rs149410244 |
| rs147870440 | rs1481012   | rs148330006 | rs1485741   | rs1487630   | rs149000560 | rs1492014   | rs149416017 |
| rs147872814 | rs148101639 | rs148330122 | rs1485745   | rs148763909 | rs149005978 | rs149205188 | rs149418433 |
| rs147875011 | rs1481045   | rs148331983 | rs1485768   | rs148766287 | rs149007767 | rs1492057   | rs149418624 |
| rs147877018 | rs148104667 | rs148332376 | rs148580205 | rs148768383 | rs149014416 | rs149206763 | rs1494204   |
| rs147880316 | rs148106383 | rs148334351 | rs148586495 | rs148770227 | rs1490151   | rs149211171 | rs1494205   |
| rs147881000 | rs148108087 | rs148342778 | rs148586547 | rs148771016 | rs1490176   | rs149211860 | rs1494209   |
| rs147881598 | rs148114281 | rs148347825 | rs148586558 | rs148771817 | rs1490191   | rs149211972 | rs149422861 |
| rs147885583 | rs148121703 | rs1483573   | rs148589938 | rs148772934 | rs149024142 | rs149212747 | rs149432766 |
| rs147886588 | rs148125759 | rs148371753 | rs148593140 | rs148775298 | rs149024257 | rs149217485 | rs149437411 |
| rs147891151 | rs148131694 | rs148376933 | rs148594123 | rs148783236 | rs1490265   | rs14922     | rs149447188 |
| rs147899239 | rs1481345   | rs148377198 | rs148597850 | rs148786069 | rs149027146 | rs149225394 | rs1494502   |
| rs147899431 | rs148136154 | rs148382129 | rs148598389 | rs148788848 | rs1490276   | rs149232047 | rs149453951 |
| rs147906392 | rs148137046 | rs148387718 | rs148601586 | rs148791220 | rs149029090 | rs1492348   | rs149454410 |
| rs1479073   | rs148137538 | rs1483890   | rs148604553 | rs148799368 | rs1490320   | rs1492436   | rs149457    |
| rs147910466 | rs148139592 | rs148389026 | rs148608463 | rs148803332 | rs149033263 | rs149249559 | rs149460172 |
| rs1479119   | rs148139847 | rs148389913 | rs1486091   | rs148808672 | rs149037075 | rs149253773 | rs149467613 |
| rs147913210 | rs148143917 | rs148394396 | rs148609498 | rs148812496 | rs1490384   | rs149254521 | rs149472274 |
| rs147924298 | rs148147734 | rs148396952 | rs1486134   | rs148815882 | rs149039920 | rs1492546   | rs1494836   |
| rs147929970 | rs148149124 | rs148397151 | rs148614065 | rs148822459 | rs149045797 | rs149257976 | rs149483638 |
| rs147934515 | rs148153072 | rs148397504 | rs1486195   | rs148823241 | rs149049023 | rs149265787 | rs1494858   |
| rs147938208 | rs148172770 | rs148405458 | rs1486236   | rs148828648 | rs149053406 | rs149273410 | rs149487184 |
| rs147943615 | rs148173313 | rs148410779 | rs148627238 | rs148833559 | rs149053776 | rs149274654 | rs149489081 |
| rs147948988 | rs1481801   | rs1484144   | rs148636479 | rs148838714 | rs149055315 | rs149281955 | rs149492745 |
| rs1479492   | rs1481814   | rs148415900 | rs148636776 | rs148844282 | rs149057881 | rs1492820   | rs1494961   |
| rs147954272 | rs1481853   | rs1484246   | rs148637595 | rs148844907 | rs1490612   | rs149282647 | rs149496329 |
| rs1479559   | rs148189116 | rs148427769 | rs148639156 | rs148845971 | rs149064151 | rs149288352 | rs1494989   |
| rs1479567   | rs148189294 | rs1484372   | rs148639588 | rs148847194 | rs149064544 | rs149288838 | rs1495017   |
| rs147957154 | rs1481950   | rs1484375   | rs148639908 | rs148849317 | rs149066340 | rs149290349 | rs149504726 |
| rs1479595   | rs148200221 | rs1484399   | rs148640443 | rs148851593 | rs149066790 | rs149290585 | rs149506335 |
| rs147964682 | rs148200394 | rs148440689 | rs1486471   | rs148861668 | rs149082597 | rs149291347 | rs1495099   |
| rs147968    | rs148204274 | rs1484559   | rs148648822 | rs148871069 | rs149082847 | rs1492914   | rs149514089 |
| rs147974484 | rs1482099   | rs148461253 | rs148652266 | rs148872875 | rs149083189 | rs149300040 | rs149518362 |
| rs147976543 | rs148212596 | rs148462165 | rs148655558 | rs148874568 | rs149092047 | rs149302195 | rs149518483 |
| rs147991290 | rs148213707 | rs148463354 | rs148657405 | rs148874756 | rs149092986 | rs149313    | rs149520992 |
| rs1479924   | rs148215228 | rs148466862 | rs148663950 | rs148880716 | rs149096812 | rs149315186 | rs149523036 |
| rs147997200 | rs148222927 | rs1484680   | rs148664256 | rs148883465 | rs149104283 | rs149317277 | rs149534615 |
| rs1480029   | rs148228241 | rs148470213 | rs148665432 | rs148885520 | rs149110519 | rs1493209   | rs149535568 |
| rs148004436 | rs148231617 | rs148474705 | rs148669811 | rs148906333 | rs1491106   | rs149333699 | rs149543464 |
| rs1480152   | rs148235292 | rs148485005 | rs148672458 | rs148906978 | rs149128771 | rs149336329 | rs149544731 |
| rs148015593 | rs148238535 | rs1484873   | rs148678804 | rs1489081   | rs149130226 | rs149344982 | rs149544854 |
| rs148015825 | rs148240484 | rs1484878   | rs148681119 | rs148910659 | rs149131600 | rs149344987 | rs149549354 |
| rs148020424 | rs1482465   | rs148490292 | rs1486826   | rs1489110   | rs149131629 | rs149351591 | rs1495509   |
| rs1480380   | rs148261157 | rs148490894 | rs148683230 | rs148911629 | rs149133270 | rs149354459 | rs1495525   |
| rs148041301 | rs148262335 | rs148495678 | rs148685782 | rs148912074 | rs149133391 | rs149354778 | rs149553138 |
| rs1480432   | rs148266530 | rs148505069 | rs1486900   | rs148912436 | rs149136588 | rs149364428 | rs149562316 |
| rs148043289 | rs148268781 | rs148514005 | rs148690811 | rs148913805 | rs149136706 | rs149364745 | rs149563809 |
| rs148046772 | rs1482698   | rs148521650 | rs148696809 | rs148916504 | rs149142    | rs149369311 | rs149564412 |
| rs148046963 | rs148274477 | rs148524322 | rs148697518 | rs148918599 | rs149142052 | rs149369377 | rs149565105 |
| rs1480470   | rs148280884 | rs148526428 | rs148703751 | rs148928116 | rs149142833 | rs1493694   | rs149566421 |
| rs1480474   | rs148281243 | rs1485272   | rs1487241   | rs1489288   | rs149148360 | rs149371970 | rs149567432 |
| rs148048756 | rs148283070 | rs1485292   | rs148725943 | rs148929820 | rs149151450 | rs149372871 | rs1495741   |
| rs1480496   | rs148285156 | rs1485300   | rs148727829 | rs148933445 | rs149153680 | rs149379258 | rs1495743   |
| rs148050755 | rs1482852   | rs1485303   | rs148734725 | rs148934699 | rs149154820 | rs149380977 | rs1495745   |
| rs148051196 | rs1482853   | rs148534175 | rs148738891 | rs148942046 | rs149155892 | rs149386674 | rs149578709 |
| rs148059420 | rs148285494 | rs148535477 | rs148739261 | rs1489486   | rs149163995 | rs149388702 | rs149580368 |

|             |             |             |             |             |             |             |             |
|-------------|-------------|-------------|-------------|-------------|-------------|-------------|-------------|
| rs149580590 | rs149843442 | rs150059308 | rs150262789 | rs150452493 | rs150600356 | rs150856817 | rs151062078 |
| rs149580940 | rs149847328 | rs150065955 | rs1502644   | rs1504549   | rs150605723 | rs150858838 | rs151067434 |
| rs149590260 | rs1498507   | rs150068736 | rs150264463 | rs1504550   | rs150608359 | rs150860676 | rs151084487 |
| rs1495965   | rs149851565 | rs150072875 | rs150266139 | rs150457564 | rs150611042 | rs1508608   | rs151102833 |
| rs149600208 | rs149859024 | rs150090623 | rs150268548 | rs150462856 | rs150616068 | rs150861794 | rs151105710 |
| rs149604913 | rs149864795 | rs150090666 | rs150273160 | rs150466745 | rs150616616 | rs150869154 | rs151106468 |
| rs149611468 | rs149866169 | rs150092813 | rs150278509 | rs150466852 | rs150621    | rs1508750   | rs151114485 |
| rs149613931 | rs1498694   | rs150095649 | rs150280972 | rs150470677 | rs150622725 | rs150876292 | rs1511159   |
| rs149615216 | rs149870361 | rs150096    | rs150282133 | rs1504721   | rs150626020 | rs1508798   | rs151120610 |
| rs149615348 | rs149870557 | rs150100144 | rs150282530 | rs150474434 | rs150627184 | rs150881176 | rs151125960 |
| rs149617956 | rs149871701 | rs150104728 | rs150284736 | rs150477134 | rs150628574 | rs150886752 | rs1511299   |
| rs149624078 | rs149877182 | rs150106684 | rs150289149 | rs150478785 | rs150640087 | rs150895667 | rs151130336 |
| rs1496255   | rs1498776   | rs150107870 | rs150289443 | rs150483923 | rs150641967 | rs150907907 | rs151132887 |
| rs149628744 | rs1498785   | rs1501086   | rs150293444 | rs1504841   | rs1506431   | rs150909339 | rs151133986 |
| rs149639773 | rs149881318 | rs150110    | rs150293538 | rs150489034 | rs150647904 | rs1509117   | rs151134704 |
| rs149641852 | rs149900590 | rs150110852 | rs150294    | rs150489241 | rs150649461 | rs1509123   | rs151136305 |
| rs149647262 | rs149903077 | rs150112597 | rs150295122 | rs150491901 | rs150649471 | rs1509141   | rs1511394   |
| rs149647582 | rs149906873 | rs150115323 | rs1502987   | rs150493080 | rs1506505   | rs150918492 | rs1511395   |
| rs1496532   | rs149908820 | rs150122016 | rs150300    | rs150493199 | rs150653367 | rs150919590 | rs1511412   |
| rs149663666 | rs149913955 | rs1501357   | rs150300171 | rs150497606 | rs150658557 | rs150921465 | rs1511550   |
| rs1496653   | rs149914551 | rs1501361   | rs150302    | rs150498232 | rs150658949 | rs150924516 | rs1511589   |
| rs149670286 | rs149914843 | rs150138294 | rs150304    | rs150500834 | rs1506636   | rs150926226 | rs151159962 |
| rs149675684 | rs149915948 | rs150138734 | rs150304133 | rs150502290 | rs150664883 | rs150929054 | rs151161966 |
| rs149678861 | rs149921263 | rs1501411   | rs1503043   | rs150505258 | rs150665764 | rs150933152 | rs151165225 |
| rs149685227 | rs149924309 | rs150141688 | rs150305233 | rs150507409 | rs1506662   | rs1509378   | rs151168737 |
| rs149687130 | rs1499280   | rs150144185 | rs150317881 | rs150510736 | rs1506719   | rs150939368 | rs151173222 |
| rs1496876   | rs149934734 | rs1501466   | rs150318825 | rs150511909 | rs1506724   | rs1509406   | rs151174000 |
| rs149689033 | rs149935213 | rs150147150 | rs150319166 | rs150518861 | rs150674717 | rs150946191 | rs1511754   |
| rs149691914 | rs1499363   | rs150151289 | rs150320659 | rs15052     | rs150678371 | rs150949191 | rs151178549 |
| rs149698066 | rs149936356 | rs150151341 | rs150327271 | rs150522999 | rs150680405 | rs150949450 | rs1511802   |
| rs149698681 | rs1499364   | rs150153921 | rs150330648 | rs150523349 | rs150684763 | rs150954567 | rs151181    |
| rs149702363 | rs149940960 | rs150155092 | rs1503351   | rs1505272   | rs150685861 | rs150956780 | rs151181359 |
| rs149708665 | rs1499428   | rs150157076 | rs150338507 | rs150527451 | rs1506871   | rs1509569   | rs151183316 |
| rs149711393 | rs149943    | rs150164120 | rs150340932 | rs1505307   | rs150694678 | rs1509605   | rs151184436 |
| rs149717948 | rs149944146 | rs1501673   | rs150341456 | rs150532297 | rs1507010   | rs150962800 | rs151186597 |
| rs149721896 | rs149948521 | rs150169808 | rs1503526   | rs150534    | rs150707349 | rs1509637   | rs151193009 |
| rs149722479 | rs149949    | rs150175599 | rs150353    | rs150535953 | rs150712926 | rs150969    | rs151193107 |
| rs1497266   | rs1499510   | rs150176269 | rs150355695 | rs150537045 | rs1507151   | rs150980669 | rs151193598 |
| rs149727694 | rs149951341 | rs150180633 | rs150356358 | rs150537577 | rs1507220   | rs1509820   | rs151205200 |
| rs149727843 | rs149952891 | rs150187724 | rs150359563 | rs150539196 | rs150728296 | rs150985681 | rs1512065   |
| rs149735550 | rs149957    | rs150188352 | rs150359707 | rs150540276 | rs150732434 | rs150986675 | rs1512102   |
| rs1497401   | rs149957269 | rs1501908   | rs150365073 | rs150540391 | rs150741403 | rs150988192 | rs1512144   |
| rs1497406   | rs149961934 | rs150194324 | rs150370599 | rs150543164 | rs1507462   | rs1509922   | rs151216    |
| rs149742777 | rs149962328 | rs150194832 | rs1503729   | rs150545244 | rs150768229 | rs151006058 | rs1512226   |
| rs149753617 | rs149963466 | rs150202082 | rs1503738   | rs150547671 | rs150772085 | rs151009319 | rs151226    |
| rs149757596 | rs149979    | rs150209695 | rs150377334 | rs150547831 | rs150781447 | rs151010045 | rs1512268   |
| rs149757663 | rs149979052 | rs150213942 | rs150377363 | rs15055490  | rs150784178 | rs151014938 | rs1512281   |
| rs149763434 | rs149984502 | rs150215901 | rs150380031 | rs150555765 | rs150790650 | rs1510224   | rs1512282   |
| rs149764880 | rs149990982 | rs150216791 | rs150383292 | rs150561664 | rs150793926 | rs151022760 | rs1512283   |
| rs149765041 | rs149992277 | rs150217538 | rs150385410 | rs150564454 | rs150797    | rs151026328 | rs1512285   |
| rs149771513 | rs149997688 | rs1502199   | rs150393409 | rs1505676   | rs150799695 | rs1510272   | rs1512288   |
| rs149772317 | rs149998036 | rs150220651 | rs150396451 | rs1505677   | rs150801101 | rs151027268 | rs151231    |
| rs149774458 | rs149998495 | rs150221602 | rs150399044 | rs150568286 | rs150803770 | rs151029532 | rs151232    |
| rs149777351 | rs149999468 | rs150221884 | rs150403348 | rs150568717 | rs150812083 | rs1510386   | rs151233    |
| rs149778057 | rs150007273 | rs150221903 | rs150414227 | rs150571318 | rs150813342 | rs151041509 | rs151233628 |
| rs149778459 | rs150011851 | rs1502233   | rs150420714 | rs150573149 | rs150814685 | rs151041685 | rs151234    |
| rs149787317 | rs150013448 | rs1502249   | rs1504215   | rs1505766   | rs150816167 | rs151044971 | rs151235402 |
| rs149787529 | rs150015846 | rs150226882 | rs150421637 | rs1505770   | rs150817755 | rs151049317 | rs1512450   |
| rs149787889 | rs150018970 | rs1502284   | rs150423652 | rs150584036 | rs150820726 | rs151050381 | rs151247099 |
| rs149793040 | rs150021439 | rs150236091 | rs150425398 | rs150585703 | rs150821390 | rs151053159 | rs151252883 |
| rs149794144 | rs150025731 | rs150237291 | rs150425699 | rs150596060 | rs150832462 | rs151053941 | rs151267808 |
| rs149801367 | rs150032261 | rs150239618 | rs150430679 | rs150596337 | rs150841499 | rs151054210 | rs151268686 |
| rs149804345 | rs150036324 | rs150248456 | rs150434627 | rs150597413 | rs150844304 | rs151057105 | rs151269177 |
| rs1498126   | rs150037652 | rs150252215 | rs150445982 | rs150597587 | rs150845610 | rs151058    | rs151269874 |
| rs1498232   | rs150046733 | rs150254607 | rs150446942 | rs150597688 | rs150850722 | rs151059019 | rs151283    |
| rs149823406 | rs150057262 | rs150260796 | rs150448650 | rs1505992   | rs150852956 | rs1510593   | rs151286246 |
| rs149829837 | rs150058248 | rs150260898 | rs150449635 | rs1506      | rs150854910 | rs151060196 | rs151288400 |

|             |             |           |           |           |           |           |           |
|-------------|-------------|-----------|-----------|-----------|-----------|-----------|-----------|
| rs15129     | rs1518393   | rs1527878 | rs1534025 | rs1539844 | rs1547247 | rs1552458 | rs1558275 |
| rs151302046 | rs1518395   | rs1528204 | rs1534112 | rs1539871 | rs1547287 | rs1552641 | rs1558318 |
| rs151305167 | rs1518890   | rs1528287 | rs1534166 | rs154001  | rs1547308 | rs1552759 | rs1558324 |
| rs151305324 | rs1519102   | rs152839  | rs1534430 | rs1540283 | rs154735  | rs1552994 | rs1558327 |
| rs151305716 | rs1519104   | rs1528435 | rs1534454 | rs1540293 | rs1547374 | rs1553091 | rs1558328 |
| rs151313170 | rs151912    | rs1528439 | rs1534696 | rs1540299 | rs1547550 | rs1553132 | rs1558344 |
| rs151315594 | rs1519224   | rs15285   | rs1534796 | rs1540687 | rs1547629 | rs1553212 | rs1558375 |
| rs151317021 | rs1519480   | rs1528624 | rs1534881 | rs1540771 | rs1547651 | rs1553318 | rs1558519 |
| rs151326733 | rs1519522   | rs1528632 | rs1535    | rs154081  | rs1547669 | rs1553477 | rs1558643 |
| rs1513272   | rs1519799   | rs1528683 | rs1535-G  | rs1540825 | rs1548306 | rs1553668 | rs1558648 |
| rs151329883 | rs151980    | rs1528706 | rs1535099 | rs1540926 | rs1548457 | rs1553754 | rs1558655 |
| rs151329939 | rs1519978   | rs1528838 | rs1535179 | rs1541102 | rs1548476 | rs1553877 | rs1558744 |
| rs151330263 | rs1520      | rs1529583 | rs1535464 | rs1541160 | rs1548607 | rs1554006 | rs1558801 |
| rs151330264 | rs1520115   | rs1529597 | rs1535500 | rs154121  | rs1548654 | rs1554194 | rs1558803 |
| rs151336    | rs1520194   | rs1529672 | rs1535669 | rs1541254 | rs1548714 | rs1554533 | rs1558804 |
| rs1513475   | rs1520195   | rs1529675 | rs1535758 | rs1541374 | rs1548770 | rs1554597 | rs1558861 |
| rs1513481   | rs1520325   | rs1529711 | rs1535770 | rs1541495 | rs1548817 | rs1554600 | rs1558902 |
| rs151349    | rs1520455   | rs1529883 | rs1535822 | rs1541597 | rs1548881 | rs155465  | rs1559040 |
| rs151352    | rs15205     | rs1529897 | rs1536014 | rs1541777 | rs1548942 | rs1554654 | rs1559253 |
| rs151361    | rs1520524   | rs15303   | rs1536053 | rs1541937 | rs1548945 | rs1554715 | rs1559278 |
| rs1513670   | rs152075    | rs1530439 | rs1536057 | rs1541995 | rs1549063 | rs1554798 | rs1559422 |
| rs151381    | rs1520919   | rs1530440 | rs1536166 | rs1542212 | rs1549143 | rs1554929 | rs155943  |
| rs1513890   | rs1521      | rs1530455 | rs1536225 | rs1542321 | rs1549212 | rs1555021 | rs155949  |
| rs151411    | rs1521047   | rs1530559 | rs1536304 | rs1542354 | rs1549287 | rs1555050 | rs1559535 |
| rs151412    | rs1521470   | rs1530687 | rs1536457 | rs154254  | rs1549293 | rs1555075 | rs1559677 |
| rs1514134   | rs1521478   | rs1530938 | rs1536478 | rs1542652 | rs1549306 | rs1555089 | rs1559903 |
| rs1514174   | rs1521516   | rs1531022 | rs1536482 | rs15427   | rs1549318 | rs1555091 | rs1559964 |
| rs1514175   | rs1521624   | rs153103  | rs1536609 | rs1542725 | rs1549319 | rs155511  | rs1560117 |
| rs1514176   | rs1521908   | rs1531070 | rs153662  | rs1542726 | rs1549320 | rs1555132 | rs1560124 |
| rs1514177   | rs152234    | rs1531094 | rs1536622 | rs154275  | rs1549426 | rs1555133 | rs1560197 |
| rs151449    | rs1522554   | rs1531140 | rs1536760 | rs1542756 | rs1549519 | rs1555136 | rs1560208 |
| rs151450    | rs1522569   | rs1531188 | rs1536907 | rs1542829 | rs1549733 | rs155524  | rs1560312 |
| rs1514895   | rs152271219 | rs1531343 | rs1537061 | rs1542924 | rs1549922 | rs1555272 | rs1560489 |
| rs1515020   | rs1522744   | rs1531404 | rs1537132 | rs1543238 | rs1549979 | rs1555399 | rs1560633 |
| rs1515098   | rs1522803   | rs1531447 | rs1537370 | rs1543438 | rs1550094 | rs1555405 | rs1560707 |
| rs1515100   | rs1522811   | rs1531517 | rs1537371 | rs154346  | rs1550117 | rs1555406 | rs1560710 |
| rs1515108   | rs1522838   | rs1531518 | rs1537372 | rs1543927 | rs1550162 | rs1555445 | rs1560833 |
| rs1515464   | rs1522931   | rs1531554 | rs1537373 | rs1544    | rs1550270 | rs1555530 | rs1561029 |
| rs1516179   | rs1523041   | rs1531576 | rs1537377 | rs1544167 | rs1550532 | rs1555543 | rs1561073 |
| rs1516180   | rs1523048   | rs1531583 | rs1537415 | rs1544301 | rs1550536 | rs155563  | rs1561105 |
| rs1516187   | rs1523178   | rs1531638 | rs1537424 | rs1544387 | rs1550623 | rs155583  | rs1561112 |
| rs1516527   | rs1523707   | rs1531903 | rs153750  | rs1544432 | rs1550816 | rs1555839 | rs1561139 |
| rs1516725   | rs1523766   | rs1532085 | rs1537504 | rs1544459 | rs1550870 | rs1555926 | rs1561198 |
| rs1516773   | rs1523768   | rs1532127 | rs1537638 | rs1544474 | rs1550972 | rs1556124 | rs156126  |
| rs1516883   | rs1523787   | rs1532170 | rs1537656 | rs1544861 | rs1550973 | rs1556500 | rs1561277 |
| rs1516886   | rs1524058   | rs1532276 | rs15380   | rs1544905 | rs1551042 | rs1556516 | rs1561369 |
| rs1516971   | rs1524065   | rs1532278 | rs1538138 | rs1544935 | rs1551210 | rs1556562 | rs1561554 |
| rs1517006   | rs1524445   | rs1532312 | rs1538170 | rs1545071 | rs155123  | rs1556659 | rs1561570 |
| rs1517036   | rs152446    | rs1532331 | rs1538171 | rs1545161 | rs1551337 | rs1556751 | rs1561589 |
| rs1517037   | rs1524920   | rs1532423 | rs1538389 | rs1545223 | rs1551355 | rs1556867 | rs1561924 |
| rs1517215   | rs1524927   | rs1532501 | rs1538482 | rs1545300 | rs1551398 | rs1557219 | rs1561927 |
| rs1517284   | rs1525164   | rs1532624 | rs1538658 | rs1545524 | rs1551399 | rs1557336 | rs1561928 |
| rs1517352   | rs1525362   | rs1532675 | rs1538774 | rs1545536 | rs1551486 | rs1557339 | rs1561958 |
| rs1517480   | rs152555    | rs1533015 | rs1538859 | rs1545552 | rs155149  | rs1557341 | rs1562064 |
| rs1517500   | rs1525735   | rs1533059 | rs1538881 | rs1545562 | rs1551568 | rs15574   | rs1562242 |
| rs1517572   | rs1525886   | rs1533096 | rs1538970 | rs1545837 | rs1551570 | rs1557550 | rs1562308 |
| rs1517586   | rs1525892   | rs1533246 | rs1539009 | rs1546231 | rs1551720 | rs1557570 | rs1562309 |
| rs151770    | rs152599    | rs1533269 | rs1539019 | rs154656  | rs1551840 | rs1557765 | rs1562396 |
| rs1517810   | rs152603    | rs1533299 | rs153909  | rs154657  | rs1551891 | rs1557779 | rs1562398 |
| rs1518072   | rs1526061   | rs1533320 | rs153916  | rs1546721 | rs1551943 | rs155779  | rs1562430 |
| rs1518086   | rs1526070   | rs1533378 | rs1539172 | rs1546723 | rs1552074 | rs1557848 | rs1562445 |
| rs1518111   | rs1526123   | rs1533426 | rs1539174 | rs1546924 | rs1552172 | rs155797  | rs1562523 |
| rs1518142   | rs1526194   | rs1533495 | rs153920  | rs1546954 | rs1552193 | rs1558001 | rs1562612 |
| rs1518146   | rs1526549   | rs1533584 | rs1539414 | rs1547014 | rs1552224 | rs1558067 | rs1562686 |
| rs1518159   | rs1526692   | rs1533688 | rs1539508 | rs1547026 | rs1552272 | rs1558172 | rs1562975 |
| rs1518170   | rs1526896   | rs1533988 | rs1539581 | rs1547088 | rs1552286 | rs1558225 | rs1562986 |
| rs1518367   | rs1527649   | rs1533992 | rs153960  | rs1547205 | rs1552330 | rs1558251 | rs1562990 |

|           |           |           |           |           |           |           |           |
|-----------|-----------|-----------|-----------|-----------|-----------|-----------|-----------|
| rs1563245 | rs1569328 | rs157572  | rs15881   | rs160282  | rs1616534 | rs1633266 | rs1641548 |
| rs1563278 | rs1569414 | rs157577  | rs1588265 | rs1602827 | rs1616727 | rs1633267 | rs1641549 |
| rs1563304 | rs1569419 | rs157580  | rs1588366 | rs160283  | rs1617208 | rs163327  | rs1642294 |
| rs1563317 | rs1569496 | rs157581  | rs1588635 | rs160335  | rs1617333 | rs1633418 | rs1642762 |
| rs1563352 | rs1569534 | rs157582  | rs1589423 | rs1603460 | rs1617640 | rs1633352 | rs1642764 |
| rs1563355 | rs1569723 | rs157588  | rs1589526 | rs160354  | rs1618689 | rs1633768 | rs1644039 |
| rs1563390 | rs1569780 | rs157595  | rs1589652 | rs1603705 | rs1619120 | rs163433  | rs1644331 |
| rs1563486 | rs1569979 | rs1575972 | rs159029  | rs160380  | rs1619179 | rs1634350 | rs1645784 |
| rs156353  | rs1569980 | rs1576101 | rs159032  | rs160451  | rs1619249 | rs1634517 | rs1645788 |
| rs156355  | rs1570032 | rs1576159 | rs1590534 | rs160452  | rs1619661 | rs1634718 | rs1646010 |
| rs1563553 | rs1570106 | rs1576263 | rs159058  | rs160458  | rs1619667 | rs1634738 | rs1646019 |
| rs156356  | rs1570203 | rs1576655 | rs1590594 | rs160459  | rs1620013 | rs1634769 | rs164632  |
| rs156357  | rs1570204 | rs157678  | rs1591726 | rs160468  | rs1620668 | rs1634791 | rs164640  |
| rs1563646 | rs1570221 | rs1577218 | rs1591734 | rs1605070 | rs1620977 | rs1634794 | rs1646555 |
| rs1563786 | rs1570247 | rs1577515 | rs1591805 | rs1605750 | rs162159  | rs163494  | rs1647381 |
| rs1563788 | rs1570249 | rs1577857 | rs1592365 | rs160593  | rs162171  | rs1634951 | rs1647396 |
| rs1563894 | rs1570255 | rs1577948 | rs1592485 | rs1606045 | rs162185  | rs1635    | rs164745  |
| rs156394  | rs1570350 | rs1578060 | rs1592757 | rs160631  | rs162227  | rs1635168 | rs164746  |
| rs1564120 | rs1570360 | rs1578407 | rs1593    | rs1606492 | rs1622406 | rs1635182 | rs164748  |
| rs1564282 | rs1570516 | rs157845  | rs1593022 | rs160659  | rs1622638 | rs163524  | rs164749  |
| rs1564347 | rs1570521 | rs1578741 | rs1593205 | rs1606708 | rs1622797 | rs1635281 | rs1648707 |
| rs1564348 | rs1570649 | rs1578862 | rs1593304 | rs1606803 | rs1623003 | rs1635291 | rs1648855 |
| rs1564641 | rs1570669 | rs1578957 | rs159365  | rs160697  | rs162332  | rs1635404 | rs1649053 |
| rs1564892 | rs1570694 | rs1579036 | rs159368  | rs1606974 | rs162366  | rs163546  | rs1649068 |
| rs1564981 | rs1570868 | rs1579050 | rs159411  | rs1607227 | rs1624259 | rs1635474 | rs1649078 |
| rs1565001 | rs1570884 | rs157934  | rs159428  | rs1607644 | rs1624295 | rs1635501 | rs1649081 |
| rs1565186 | rs1570926 | rs157935  | rs1594318 | rs1607741 | rs162445  | rs1635506 | rs164926  |
| rs1565228 | rs1571217 | rs1579381 | rs1594829 | rs1608113 | rs1624963 | rs1635550 | rs164938  |
| rs1565330 | rs1571235 | rs1579557 | rs1594996 | rs1608400 | rs162531  | rs163563  | rs1650007 |
| rs1565568 | rs1571401 | rs1579641 | rs1595029 | rs1608945 | rs1625427 | rs163574  | rs1650132 |
| rs1565716 | rs1571536 | rs1580004 | rs1595217 | rs160919  | rs1625579 | rs1635851 | rs1650146 |
| rs1565735 | rs1571583 | rs1580006 | rs1595260 | rs1609375 | rs1625895 | rs1635852 | rs1650505 |
| rs1565818 | rs1571590 | rs1580019 | rs159540  | rs1609391 | rs1626067 | rs1635853 | rs1650507 |
| rs1565909 | rs157165  | rs1580083 | rs159544  | rs1609652 | rs1626340 | rs1636250 | rs1650527 |
| rs1566039 | rs157170  | rs1580099 | rs1595693 | rs1609712 | rs1626441 | rs1636251 | rs1650911 |
| rs1566045 | rs1571790 | rs1580173 | rs1595810 | rs1609783 | rs1627804 | rs1636744 | rs1651274 |
| rs1566085 | rs1571878 | rs1580278 | rs1595824 | rs1609829 | rs1627854 | rs1637571 | rs165149  |
| rs1566129 | rs1571911 | rs1580347 | rs1596747 | rs1609860 | rs1628323 | rs1637659 | rs165160  |
| rs1566497 | rs1571956 | rs1581630 | rs1596854 | rs1609909 | rs1628427 | rs1637742 | rs165177  |
| rs1567084 | rs1571967 | rs1581717 | rs1597598 | rs1610095 | rs1628768 | rs1637770 | rs1651886 |
| rs1567154 | rs157198  | rs15818   | rs1598121 | rs1610096 | rs162890  | rs163790  | rs165199  |
| rs1567168 | rs1572072 | rs1581803 | rs1598207 | rs1610265 | rs1629083 | rs163803  | rs1652376 |
| rs1567224 | rs1572381 | rs158186  | rs1598656 | rs1610401 | rs1629168 | rs1638556 | rs1652752 |
| rs1567353 | rs1572411 | rs1582763 | rs159868  | rs1610601 | rs1629212 | rs1638665 | rs16531   |
| rs1567398 | rs1572604 | rs1582874 | rs1598856 | rs1610660 | rs1629862 | rs1638703 | rs165316  |
| rs1567558 | rs1572605 | rs1582919 | rs1598927 | rs1610707 | rs1630266 | rs163879  | rs1654425 |
| rs15676   | rs1572668 | rs1582931 | rs1599166 | rs1610943 | rs1630500 | rs163897  | rs1654439 |
| rs1567668 | rs1572982 | rs1583333 | rs1599180 | rs1611124 | rs1630688 | rs1639122 | rs1654723 |
| rs1567854 | rs1572995 | rs1583700 | rs1599374 | rs1611141 | rs1630736 | rs1639429 | rs1655296 |
| rs1567865 | rs1573036 | rs1583974 | rs1599473 | rs1611579 | rs1630848 | rs163951  | rs1655300 |
| rs156795  | rs1573090 | rs1584063 | rs1599491 | rs1611637 | rs1630916 | rs164009  | rs1655557 |
| rs1568003 | rs1573178 | rs1584324 | rs159960  | rs1611719 | rs1631022 | rs164011  | rs1655558 |
| rs1568072 | rs1573296 | rs1584899 | rs159963  | rs1612092 | rs1631026 | rs1640267 | rs1655901 |
| rs1568079 | rs1573576 | rs1585213 | rs1599750 | rs1612735 | rs163149  | rs1640269 | rs165633  |
| rs1568450 | rs1573643 | rs1585364 | rs1599795 | rs1612904 | rs163160  | rs1640272 | rs1656369 |
| rs1568452 | rs1573819 | rs1585453 | rs16003   | rs1612986 | rs1631677 | rs1640273 | rs1656404 |
| rs1568488 | rs1573891 | rs1586059 | rs160045  | rs1613662 | rs163171  | rs1640299 | rs165655  |
| rs1568672 | rs15739   | rs1586068 | rs1600831 | rs1614170 | rs163182  | rs1640875 | rs1656614 |
| rs1568679 | rs1574220 | rs1586274 | rs1601409 | rs1614377 | rs163184  | rs1641025 | rs1656794 |
| rs1568799 | rs1574277 | rs158629  | rs1601817 | rs1614625 | rs163229  | rs164103  | rs1656966 |
| rs1568923 | rs1574430 | rs158638  | rs160183  | rs1614887 | rs1632631 | rs1641155 | rs165722  |
| rs1569011 | rs1574587 | rs158639  | rs160184  | rs1614972 | rs1632862 | rs164133  | rs1657346 |
| rs1569092 | rs157512  | rs1586459 | rs160189  | rs1615350 | rs1632887 | rs1641457 | rs1657408 |
| rs1569135 | rs157518  | rs158653  | rs1601933 | rs1615504 | rs1632941 | rs1641511 | rs1657621 |
| rs1569171 | rs1575223 | rs1587103 | rs1601934 | rs1616065 | rs1633005 | rs1641523 | rs1657863 |
| rs1569209 | rs1575667 | rs1587335 | rs1601935 | rs1616289 | rs1633063 | rs1641537 | rs1657880 |
| rs1569266 | rs1575676 | rs1587704 | rs1602580 | rs161645  | rs1633096 | rs1641546 | rs1657930 |

|           |            |            |            |            |            |            |            |
|-----------|------------|------------|------------|------------|------------|------------|------------|
| rs1658319 | rs1672992  | rs1683587  | rs16851438 | rs16867528 | rs16892494 | rs16909859 | rs16932777 |
| rs1658323 | rs167365   | rs16836338 | rs16851483 | rs16867574 | rs16892523 | rs16909898 | rs16932958 |
| rs1658441 | rs167374   | rs16837000 | rs16851720 | rs16867576 | rs16892766 | rs16909902 | rs16932966 |
| rs1658469 | rs1674589  | rs16837021 | rs16851779 | rs16868036 | rs16892892 | rs16909922 | rs16933011 |
| rs1658471 | rs1674777  | rs16837171 | rs1685191  | rs16868246 | rs16893344 | rs16909978 | rs16933084 |
| rs1658820 | rs167479   | rs16837641 | rs16853043 | rs16869834 | rs16893543 | rs16910193 | rs16933812 |
| rs165895  | rs167549   | rs16837754 | rs16853173 | rs16870458 | rs16893717 | rs16911180 | rs1693456  |
| rs1658972 | rs1676062  | rs16838527 | rs16853637 | rs16871807 | rs16894116 | rs16912921 | rs1693457  |
| rs1659127 | rs1676712  | rs16839578 | rs16853722 | rs16871902 | rs16894234 | rs16913221 | rs16935073 |
| rs1659258 | rs167684   | rs16839682 | rs16853958 | rs16872571 | rs1689437  | rs16913594 | rs16935279 |
| rs165944  | rs1677490  | rs16839832 | rs16854009 | rs16873402 | rs16894959 | rs1691483  | rs16935416 |
| rs1659684 | rs1677498  | rs16839841 | rs16854020 | rs16873418 | rs1689510  | rs16914980 | rs16935432 |
| rs165975  | rs167769   | rs1684041  | rs16854023 | rs16873715 | rs16895130 | rs16914997 | rs1693560  |
| rs1660131 | rs1678981  | rs1684053  | rs16854048 | rs1687391  | rs16895802 | rs16915102 | rs1693567  |
| rs1660237 | rs1679013  | rs168407   | rs16854051 | rs16874052 | rs1689583  | rs16916303 | rs1693576  |
| rs1660322 | rs1679014  | rs16840719 | rs16855026 | rs16874060 | rs16895831 | rs16916544 | rs1693584  |
| rs1660830 | rs167915   | rs16841741 | rs16856139 | rs16874073 | rs16895888 | rs16916548 | rs16936765 |
| rs1660839 | rs167924   | rs16841904 | rs16856247 | rs1687479  | rs16896068 | rs16916639 | rs16936870 |
| rs1660958 | rs1679426  | rs16842320 | rs16856332 | rs16876394 | rs16896276 | rs16917043 | rs16937003 |
| rs1661052 | rs1679971  | rs16842559 | rs168565   | rs16877320 | rs16896398 | rs16917237 | rs16937390 |
| rs1661725 | rs1680005  | rs16843346 | rs16856823 | rs16878091 | rs16896742 | rs16917522 | rs16937456 |
| rs1662185 | rs1680446  | rs16843350 | rs16856838 | rs16878236 | rs16896999 | rs16917546 | rs16937474 |
| rs166232  | rs1680845  | rs16843412 | rs16856846 | rs16878812 | rs16897515 | rs1691799  | rs16937956 |
| rs1662835 | rs168144   | rs16843629 | rs16856859 | rs16878921 | rs1689788  | rs16918024 | rs169382   |
| rs1662837 | rs1681464  | rs16843742 | rs16856911 | rs16879552 | rs1689791  | rs16918167 | rs16938437 |
| rs1663564 | rs1681630  | rs16844296 | rs16857021 | rs16879765 | rs1689797  | rs16918254 | rs16939126 |
| rs1663626 | rs1681739  | rs16844364 | rs16857031 | rs1688031  | rs1689800  | rs16918636 | rs16939162 |
| rs1663687 | rs1681743  | rs16844401 | rs16857609 | rs1688043  | rs1689803  | rs16920206 | rs16939607 |
| rs166418  | rs1681817  | rs16844417 | rs168578   | rs16880442 | rs16898037 | rs1692120  | rs16939881 |
| rs1664789 | rs168189   | rs1684466  | rs16858082 | rs16880831 | rs16898508 | rs16921209 | rs1693997  |
| rs1665272 | rs1681967  | rs16844839 | rs16858093 | rs16881063 | rs16898691 | rs16921385 | rs16940170 |
| rs1665901 | rs16822665 | rs16845091 | rs16858210 | rs16881572 | rs16898823 | rs1692144  | rs16940186 |
| rs16661   | rs16823124 | rs16845301 | rs16858456 | rs16881971 | rs16899524 | rs16921914 | rs16940202 |
| rs1666132 | rs16823566 | rs16845383 | rs16858573 | rs16882001 | rs16900528 | rs16921981 | rs16940212 |
| rs1666839 | rs16823866 | rs16845580 | rs16858768 | rs16882447 | rs16900846 | rs16922097 | rs16940672 |
| rs1667255 | rs16823886 | rs1684583  | rs16858828 | rs16882450 | rs16901689 | rs16922576 | rs1694068  |
| rs1667392 | rs16824134 | rs1684600  | rs16858868 | rs16883128 | rs16901814 | rs16922724 | rs16940823 |
| rs1667394 | rs16825008 | rs1684608  | rs16859232 | rs16884025 | rs16901979 | rs16923189 | rs1694112  |
| rs1667633 | rs16825181 | rs1684621  | rs16859517 | rs16884402 | rs16902086 | rs169235   | rs1694123  |
| rs1667747 | rs16825267 | rs16846351 | rs16860328 | rs16884419 | rs16902094 | rs16923637 | rs16942194 |
| rs1668091 | rs16826069 | rs16846410 | rs16860332 | rs16885018 | rs16902104 | rs16923647 | rs16942323 |
| rs166820  | rs16826757 | rs16846499 | rs16860342 | rs16885512 | rs16902871 | rs16924144 | rs16942341 |
| rs1668331 | rs16826827 | rs16846735 | rs16860928 | rs16885581 | rs16902900 | rs16926246 | rs16942421 |
| rs166835  | rs16827201 | rs16846805 | rs16860974 | rs16886034 | rs16902946 | rs16926249 | rs16942585 |
| rs1668357 | rs16827466 | rs16846938 | rs16860992 | rs16886113 | rs16903122 | rs16926778 | rs16942713 |
| rs166840  | rs16828019 | rs16847364 | rs16861209 | rs16886181 | rs16903275 | rs16926842 | rs16942751 |
| rs1668871 | rs1682806  | rs16847402 | rs16861329 | rs16886287 | rs16903285 | rs16927253 | rs16942887 |
| rs1668873 | rs16828074 | rs16848284 | rs16861990 | rs16886364 | rs16903574 | rs16927927 | rs16942927 |
| rs1669025 | rs16828263 | rs16848425 | rs16862069 | rs16886397 | rs16904123 | rs1692799  | rs16942944 |
| rs166906  | rs16828607 | rs16849211 | rs168622   | rs16886448 | rs16904181 | rs16928078 | rs16943246 |
| rs1669340 | rs16828799 | rs16849225 | rs16862425 | rs16886790 | rs16905190 | rs16928079 | rs16943520 |
| rs166976  | rs168290   | rs16849542 | rs16862512 | rs16887244 | rs16905212 | rs16928084 | rs1694367  |
| rs167024  | rs16829174 | rs16849728 | rs16862676 | rs16887442 | rs16905753 | rs1692819  | rs1694369  |
| rs167025  | rs16829649 | rs16849932 | rs16862729 | rs16887604 | rs16905897 | rs16928280 | rs1694379  |
| rs1670533 | rs16829840 | rs16850049 | rs16862780 | rs16888184 | rs16906252 | rs16928297 | rs16944    |
| rs167096  | rs16830188 | rs16850073 | rs16863633 | rs16888428 | rs16906548 | rs169285   | rs16944244 |
| rs1671135 | rs16830728 | rs16850360 | rs16863765 | rs16889666 | rs1690667  | rs169287   | rs1694456  |
| rs1671152 | rs16831132 | rs16850408 | rs16863925 | rs16890057 | rs16906845 | rs16928809 | rs16945612 |
| rs1671269 | rs16832246 | rs168505   | rs16864081 | rs16890334 | rs16906991 | rs16928927 | rs16946539 |
| rs1671476 | rs16832798 | rs16850592 | rs168643   | rs1689040  | rs16907058 | rs16929097 | rs16947005 |
| rs1671753 | rs16832995 | rs16850767 | rs16864515 | rs16890979 | rs16907277 | rs16929368 | rs16947122 |
| rs1671770 | rs16833934 | rs16850772 | rs16865262 | rs16891077 | rs16907751 | rs16930370 | rs16947165 |
| rs167180  | rs16834426 | rs16850864 | rs16866061 | rs16891532 | rs1690789  | rs16930371 | rs16948048 |
| rs167203  | rs16834431 | rs16850885 | rs16866397 | rs16891727 | rs169080   | rs16930542 | rs16948098 |
| rs1672658 | rs16834743 | rs16851151 | rs16866933 | rs16891867 | rs1690816  | rs16930589 | rs16948101 |
| rs1672811 | rs16835093 | rs16851203 | rs16867300 | rs16891982 | rs16908520 | rs16931769 | rs16948200 |
| rs1672908 | rs16835819 | rs16851397 | rs16867384 | rs16892260 | rs16909256 | rs16932455 | rs16948305 |

|            |            |            |            |            |            |            |            |
|------------|------------|------------|------------|------------|------------|------------|------------|
| rs16948744 | rs16967103 | rs16983616 | rs17003752 | rs17021683 | rs17034641 | rs1704773  | rs1706821  |
| rs16948876 | rs16967755 | rs16983844 | rs170041   | rs17021918 | rs17034666 | rs17047804 | rs17068810 |
| rs1694933  | rs1696803  | rs1698403  | rs17004869 | rs17022006 | rs17034687 | rs17048367 | rs17069206 |
| rs16949418 | rs16968739 | rs16986508 | rs17004922 | rs17022427 | rs17034876 | rs17048801 | rs17069646 |
| rs16949788 | rs16969681 | rs16986825 | rs17005118 | rs17022444 | rs1703492  | rs17048855 | rs17070072 |
| rs16949899 | rs16969968 | rs16986864 | rs17005647 | rs17022539 | rs17035181 | rs17048879 | rs1707302  |
| rs16949934 | rs16970664 | rs16986953 | rs17005891 | rs17022808 | rs17035289 | rs17049085 | rs1707308  |
| rs1695     | rs16970664 | rs16987303 | rs17005892 | rs1702294  | rs17035323 | rs17049185 | rs1707322  |
| rs16950101 | rs16971217 | rs16988208 | rs17005934 | rs17023073 | rs17035378 | rs17049244 | rs1707334  |
| rs16950303 | rs16971241 | rs16988333 | rs17006028 | rs17023131 | rs17035390 | rs17049270 | rs1707336  |
| rs16950305 | rs16971669 | rs16988381 | rs17006038 | rs17023134 | rs17035437 | rs17049478 | rs17073715 |
| rs169504   | rs16971802 | rs16988410 | rs17006292 | rs17023135 | rs17035646 | rs17049487 | rs17073759 |
| rs16951001 | rs16971895 | rs16988991 | rs17006441 | rs17023223 | rs17035917 | rs17049502 | rs17074093 |
| rs16951275 | rs16971976 | rs16989138 | rs17006576 | rs17023276 | rs17036085 | rs17049509 | rs17074143 |
| rs16951547 | rs16972050 | rs16989232 | rs17007761 | rs17023457 | rs17036152 | rs17049548 | rs17074145 |
| rs16951622 | rs16972222 | rs16989483 | rs17008482 | rs17023459 | rs17036160 | rs17049722 | rs17074575 |
| rs16951626 | rs16972296 | rs16989541 | rs1700874  | rs170239   | rs17036170 | rs17049820 | rs17074987 |
| rs16951805 | rs16972308 | rs16989695 | rs17008851 | rs17023900 | rs17036326 | rs17049905 | rs17075438 |
| rs16951879 | rs16972495 | rs16989724 | rs17008951 | rs170240   | rs17036328 | rs17049926 | rs17075682 |
| rs16952362 | rs16972552 | rs16989763 | rs17008972 | rs17024258 | rs17036350 | rs17050072 | rs17075855 |
| rs16952522 | rs16973225 | rs16990169 | rs17008991 | rs17024393 | rs17037148 | rs17050272 | rs17075898 |
| rs16952939 | rs169738   | rs16990210 | rs17009288 | rs17024437 | rs17037388 | rs17050452 | rs17076671 |
| rs16953002 | rs16973982 | rs16990641 | rs17009315 | rs17024684 | rs17037390 | rs17051321 | rs17076724 |
| rs1695315  | rs1697405  | rs16991615 | rs1700943  | rs17025117 | rs17037452 | rs17051932 | rs17076726 |
| rs16953305 | rs16974196 | rs16992204 | rs17010957 | rs17025198 | rs1703755  | rs17052058 | rs17076896 |
| rs16953475 | rs1697421  | rs16992647 | rs17010961 | rs17025388 | rs17038164 | rs17052419 | rs17079653 |
| rs16953685 | rs16974263 | rs16992771 | rs17011002 | rs17025736 | rs17038182 | rs1705263  | rs17079745 |
| rs16953946 | rs16975080 | rs16993221 | rs17011141 | rs17026114 | rs17038564 | rs17052708 | rs17079875 |
| rs16954078 | rs16975275 | rs1699337  | rs17011373 | rs17026148 | rs17038846 | rs17053607 | rs17079881 |
| rs16954106 | rs16975388 | rs16993461 | rs17011715 | rs17026156 | rs17038861 | rs17053711 | rs17080089 |
| rs16954120 | rs16975758 | rs16993864 | rs17011726 | rs17026212 | rs17039171 | rs17053931 | rs17080091 |
| rs16954688 | rs16975768 | rs16994583 | rs17011903 | rs17026452 | rs17040190 | rs17054136 | rs17080093 |
| rs16954698 | rs16975792 | rs1699462  | rs170121   | rs17027607 | rs17040284 | rs17054300 | rs17080102 |
| rs16955886 | rs16975921 | rs16995255 | rs17012216 | rs17027633 | rs17040481 | rs17055178 | rs17081933 |
| rs16956273 | rs1697593  | rs16995450 | rs17012234 | rs17027750 | rs17040773 | rs17055818 | rs17081935 |
| rs16956707 | rs16976004 | rs16995626 | rs17012334 | rs17028556 | rs17041333 | rs17056278 | rs17082301 |
| rs16956811 | rs1697692  | rs16995681 | rs17013212 | rs17028615 | rs17041417 | rs17056301 | rs17082391 |
| rs16957304 | rs16976932 | rs16996066 | rs17013314 | rs1702877  | rs17041439 | rs1705694  | rs1708299  |
| rs16957408 | rs16976954 | rs16996148 | rs17014375 | rs17028973 | rs17041868 | rs17057164 | rs1708302  |
| rs16957893 | rs16977635 | rs16996185 | rs17014873 | rs17029006 | rs17041869 | rs17057285 | rs17083079 |
| rs16958292 | rs16977972 | rs16996277 | rs170149   | rs17029090 | rs1704190  | rs17057718 | rs17083297 |
| rs16958445 | rs16978075 | rs16996644 | rs17014913 | rs17029206 | rs17042098 | rs1705773  | rs17083533 |
| rs16958559 | rs16978162 | rs16996657 | rs17015169 | rs17029445 | rs17042102 | rs17057868 | rs17083590 |
| rs16958610 | rs16978165 | rs16996700 | rs17015865 | rs17029573 | rs17042171 | rs17057975 | rs17083718 |
| rs16958642 | rs16978167 | rs16996942 | rs17016673 | rs17029617 | rs17042591 | rs17059534 | rs17083838 |
| rs16958751 | rs16978240 | rs16997087 | rs1701704  | rs17030394 | rs17042691 | rs17059596 | rs17084051 |
| rs16959063 | rs16978339 | rs16997125 | rs17017911 | rs17030453 | rs17043233 | rs17059668 | rs17084143 |
| rs16959442 | rs16978350 | rs16998073 | rs1701829  | rs17030613 | rs17043393 | rs1706003  | rs17084283 |
| rs16959783 | rs16978474 | rs16998583 | rs170183   | rs17030818 | rs17043570 | rs17060290 | rs17085007 |
| rs16959955 | rs16978854 | rs16999103 | rs17018311 | rs17030845 | rs1704413  | rs17060460 | rs17085106 |
| rs1696058  | rs16978956 | rs16999165 | rs17018482 | rs17031323 | rs17044565 | rs17060705 | rs17085633 |
| rs16961828 | rs169797   | rs16999497 | rs17018786 | rs17031671 | rs1704528  | rs17061048 | rs17085775 |
| rs16961974 | rs16979901 | rs1700048  | rs17019336 | rs17031683 | rs1704529  | rs17061453 | rs17086188 |
| rs16962399 | rs16980027 | rs17000918 | rs17019340 | rs17032400 | rs17046036 | rs17061503 | rs17086692 |
| rs16962650 | rs16980679 | rs17001095 | rs17019354 | rs17032696 | rs17046097 | rs17061696 | rs17086702 |
| rs16962845 | rs16980741 | rs17001561 | rs17019365 | rs17032980 | rs17046216 | rs17061975 | rs17086772 |
| rs1696361  | rs16981326 | rs1700159  | rs17019602 | rs17033015 | rs17046259 | rs17062411 | rs17087007 |
| rs16963833 | rs1698135  | rs17001654 | rs17020055 | rs17033059 | rs17046310 | rs17062711 | rs17087971 |
| rs1696390  | rs16981598 | rs17001868 | rs17020122 | rs17033112 | rs17046344 | rs170634   | rs17088512 |
| rs16964211 | rs16982345 | rs17001943 | rs17020136 | rs17033114 | rs17046380 | rs1706497  | rs17089026 |
| rs16964720 | rs1698237  | rs17001974 | rs17020139 | rs17033321 | rs17046596 | rs17065323 | rs1709     |
| rs16965217 | rs16982520 | rs17001977 | rs17020193 | rs17033324 | rs1704668  | rs17065417 | rs17090055 |
| rs16966161 | rs16982655 | rs17002025 | rs17020436 | rs17033621 | rs17046767 | rs17066096 | rs17090300 |
| rs16966212 | rs1698268  | rs17002069 | rs17020634 | rs17033702 | rs1704700  | rs17066875 | rs17090881 |
| rs16966271 | rs16982707 | rs17002460 | rs17020762 | rs17034046 | rs17047200 | rs1706708  | rs17091116 |
| rs16966292 | rs16982907 | rs17003427 | rs17020993 | rs17034274 | rs17047574 | rs17067102 | rs17091269 |
| rs16966555 | rs16983329 | rs17003488 | rs17021463 | rs17034615 | rs17047703 | rs17067481 | rs17091786 |

|            |            |            |            |            |            |            |            |
|------------|------------|------------|------------|------------|------------|------------|------------|
| rs17091891 | rs17112580 | rs17133587 | rs17149709 | rs171697   | rs17189000 | rs17208215 | rs17236529 |
| rs17091905 | rs17113689 | rs17133680 | rs17150537 | rs1716983  | rs17189452 | rs1720825  | rs17236800 |
| rs17092148 | rs17113730 | rs17133698 | rs17150703 | rs1716990  | rs17189482 | rs17208368 | rs17236969 |
| rs170934   | rs17113878 | rs17133805 | rs17150996 | rs17170187 | rs17190106 | rs17209837 | rs17237465 |
| rs17093831 | rs17113882 | rs1713450  | rs17151229 | rs1717027  | rs17190166 | rs17209866 | rs17237537 |
| rs17093914 | rs17114036 | rs17134531 | rs17151318 | rs17170333 | rs17190418 | rs17210179 | rs17238775 |
| rs1709393  | rs17114046 | rs17134585 | rs17151377 | rs17170519 | rs17190618 | rs1721043  | rs17240160 |
| rs17094148 | rs17114641 | rs1713460  | rs17151565 | rs17171238 | rs17191004 | rs17210692 | rs17240268 |
| rs17094188 | rs17114671 | rs17134767 | rs17151637 | rs17171670 | rs17191491 | rs17210898 | rs172404   |
| rs17094222 | rs17114699 | rs17135357 | rs17151684 | rs17171703 | rs17191520 | rs172111   | rs1724088  |
| rs17094393 | rs17115088 | rs17135399 | rs17151739 | rs17171818 | rs17191797 | rs17212014 | rs17241253 |
| rs17094448 | rs17115145 | rs17135437 | rs17151763 | rs1717204  | rs17192134 | rs17212146 | rs1724184  |
| rs17094983 | rs17115310 | rs17135875 | rs17151854 | rs17172621 | rs1719271  | rs17212223 | rs17242358 |
| rs17095    | rs17115481 | rs1713616  | rs17151908 | rs17172647 | rs1719272  | rs1721447  | rs17242380 |
| rs17095079 | rs17116149 | rs17136324 | rs17151919 | rs17172739 | rs1719285  | rs17215231 | rs1724298  |
| rs17095355 | rs17116384 | rs17136561 | rs17152083 | rs17173238 | rs17192932 | rs17215781 | rs1724409  |
| rs17095830 | rs17116670 | rs17136627 | rs17152408 | rs17173637 | rs17193122 | rs17216525 | rs1724411  |
| rs17096089 | rs17116710 | rs1713675  | rs17153559 | rs17173698 | rs17193211 | rs17216573 | rs1724422  |
| rs17096107 | rs1711731  | rs1713676  | rs17153585 | rs171748   | rs17193410 | rs17216707 | rs1724425  |
| rs17096758 | rs17117817 | rs17137004 | rs17153734 | rs17174870 | rs17193922 | rs17216820 | rs1724429  |
| rs17096778 | rs17118088 | rs17137412 | rs17153755 | rs17175227 | rs17194468 | rs17217098 | rs1724438  |
| rs17097461 | rs17118739 | rs17137805 | rs1715429  | rs17175643 | rs17194474 | rs17218161 | rs17244416 |
| rs17097464 | rs17119    | rs17137933 | rs17154511 | rs17175830 | rs17194490 | rs17218455 | rs1724557  |
| rs17097556 | rs17119370 | rs17138199 | rs1715460  | rs17175860 | rs17196295 | rs17220241 | rs17245822 |
| rs17097744 | rs17119461 | rs17138358 | rs17154889 | rs17177078 | rs17196752 | rs17220352 | rs17246129 |
| rs170986   | rs17119973 | rs17138435 | rs17155242 | rs1717720  | rs17197116 | rs17220872 | rs17246404 |
| rs17099623 | rs17120257 | rs17138476 | rs17156195 | rs1717731  | rs17197663 | rs17221124 | rs17246599 |
| rs17099893 | rs17120351 | rs17138478 | rs17156360 | rs17178006 | rs17198990 | rs1722133  | rs1724725  |
| rs17100142 | rs17121881 | rs17138703 | rs17156577 | rs17178139 | rs17199328 | rs1722136  | rs17247838 |
| rs17100759 | rs17122278 | rs17138723 | rs17157266 | rs17178527 | rs17199331 | rs1722141  | rs17248169 |
| rs17101241 | rs1712240  | rs17138749 | rs17157825 | rs17179670 | rs1719934  | rs17221417 | rs17248377 |
| rs17101394 | rs17122772 | rs17138751 | rs17157836 | rs17179798 | rs1719983  | rs17221725 | rs17248480 |
| rs17101456 | rs17122812 | rs1713984  | rs17158386 | rs17180132 | rs17199964 | rs17223387 | rs17248751 |
| rs17101520 | rs17123039 | rs1713985  | rs17158413 | rs17180489 | rs17200067 | rs17223714 | rs17248840 |
| rs17101804 | rs17123289 | rs17140201 | rs1715919  | rs17181170 | rs1720035  | rs17223841 | rs1724888  |
| rs17101923 | rs17123349 | rs17140672 | rs17159338 | rs17181171 | rs17200543 | rs17223841 | rs17248887 |
| rs171021   | rs17123518 | rs171408   | rs17160151 | rs1718188  | rs17200698 | rs17224476 | rs1724889  |
| rs17102884 | rs17123764 | rs17140875 | rs17160804 | rs17181956 | rs17201143 | rs17224527 | rs17248895 |
| rs17103186 | rs17124112 | rs17141120 | rs17161026 | rs17182090 | rs17201148 | rs1722558  | rs17249128 |
| rs17103286 | rs17124679 | rs17141483 | rs17161045 | rs1718302  | rs17201192 | rs1722666  | rs17249141 |
| rs1710354  | rs17125093 | rs17142067 | rs17161076 | rs1718309  | rs17201704 | rs17226898 | rs17249398 |
| rs17103572 | rs17125457 | rs17142462 | rs1716162  | rs17183295 | rs17201864 | rs17227210 | rs17249754 |
| rs17105232 | rs17125651 | rs17142630 | rs17161692 | rs171835   | rs17201923 | rs17227231 | rs17250080 |
| rs17105272 | rs17125924 | rs17142799 | rs1716180  | rs17183628 | rs17202341 | rs17228058 | rs17250196 |
| rs17106184 | rs17125944 | rs17143387 | rs17161827 | rs17183814 | rs17203016 | rs1722845  | rs17250392 |
| rs17106447 | rs1712606  | rs17144046 | rs1716183  | rs17184007 | rs172032   | rs1722846  | rs17250853 |
| rs17106817 | rs1712652  | rs17144467 | rs17162190 | rs17184083 | rs17203687 | rs1722850  | rs17250872 |
| rs17106852 | rs17126556 | rs1714507  | rs17162854 | rs17184180 | rs17205170 | rs1722883  | rs17250977 |
| rs17106896 | rs17126672 | rs1714510  | rs17163154 | rs17184313 | rs17205463 | rs1722886  | rs17251    |
| rs17107803 | rs17126879 | rs17145188 | rs17163397 | rs17184382 | rs17205528 | rs17229044 | rs17251221 |
| rs17108260 | rs17127170 | rs1714521  | rs1716393  | rs17184549 | rs17205640 | rs17229285 | rs17251689 |
| rs17108344 | rs17127481 | rs1714524  | rs17164    | rs17185038 | rs17205908 | rs17229679 | rs17252936 |
| rs17109221 | rs171277   | rs17145713 | rs17164067 | rs17185536 | rs17205951 | rs17229943 | rs17253010 |
| rs17109256 | rs17127816 | rs17145717 | rs1716409  | rs17185657 | rs17205972 | rs1723016  | rs172531   |
| rs17109512 | rs17128091 | rs17145738 | rs17164894 | rs17185996 | rs17205986 | rs1723018  | rs17253658 |
| rs17109875 | rs17128425 | rs17145750 | rs17164954 | rs17186024 | rs17205993 | rs1723022  | rs17253672 |
| rs17110990 | rs17129031 | rs171460   | rs1716505  | rs17186084 | rs17206055 | rs17231212 | rs17254118 |
| rs17110109 | rs17129265 | rs17146964 | rs17165136 | rs17186106 | rs17206075 | rs17231390 | rs17254387 |
| rs17110321 | rs17129789 | rs17147036 | rs17165295 | rs17186335 | rs17206736 | rs17231506 | rs1725452  |
| rs17110447 | rs17130220 | rs17148090 | rs17165769 | rs17186366 | rs17206973 | rs17231520 | rs17254590 |
| rs17111495 | rs17130567 | rs17148127 | rs17166182 | rs17186681 | rs17207042 | rs17232687 | rs17256211 |
| rs17111503 | rs17130631 | rs17148514 | rs17167034 | rs17187854 | rs17207368 | rs17233066 | rs17257349 |
| rs1711161  | rs17131123 | rs17148926 | rs17167170 | rs17188434 | rs17207524 | rs17234657 | rs17257827 |
| rs17111684 | rs1713222  | rs17148998 | rs17167210 | rs1718845  | rs17207890 | rs17234745 | rs1725788  |
| rs17111697 | rs17132259 | rs17149197 | rs17167945 | rs1718849  | rs17207986 | rs17234749 | rs17258166 |
| rs1711171  | rs17133297 | rs17149254 | rs17168486 | rs1718859  | rs17208030 | rs1723480  | rs172586   |
| rs17112252 | rs17133347 | rs17149632 | rs17168815 | rs1718860  | rs17208187 | rs17236206 | rs17259045 |



|            |            |            |            |            |            |            |            |
|------------|------------|------------|------------|------------|------------|------------|------------|
| rs17260689 | rs17285646 | rs17309930 | rs17346452 | rs17372140 | rs17405635 | rs17428810 | rs174545   |
| rs17261138 | rs17286052 | rs17310879 | rs17346473 | rs17372936 | rs17405722 | rs17428931 | rs17454517 |
| rs17261179 | rs17286411 | rs17311264 | rs173466   | rs1737329  | rs17405819 | rs17428945 | rs17454584 |
| rs1726140  | rs17287293 | rs17311976 | rs1734787  | rs17373621 | rs17405885 | rs17429745 | rs174546   |
| rs17262815 | rs17287504 | rs1731243  | rs17348216 | rs17373738 | rs17405916 | rs1742982  | rs174547   |
| rs17262885 | rs17287714 | rs1731249  | rs17348299 | rs17374439 | rs17406680 | rs17430287 | rs174548   |
| rs172629   | rs1728785  | rs1731259  | rs17348528 | rs17375167 | rs17407658 | rs1743083  | rs174549   |
| rs17263666 | rs17287978 | rs17313732 | rs17348586 | rs17376456 | rs17408037 | rs17430897 | rs174550   |
| rs172639   | rs17288108 | rs17313971 | rs17348614 | rs17377218 | rs17408150 | rs17431641 | rs174551   |
| rs17263917 | rs17288409 | rs17315037 | rs1734907  | rs17377951 | rs1740828  | rs17431717 | rs17455138 |
| rs172642   | rs17288588 | rs17315501 | rs1734911  | rs17378539 | rs17408550 | rs17431820 | rs174554   |
| rs17264332 | rs1728918  | rs17315646 | rs17349283 | rs1737889  | rs17408832 | rs17432675 | rs174555   |
| rs17264736 | rs172906   | rs17318596 | rs1734958  | rs1737893  | rs17409101 | rs17432979 | rs17455577 |
| rs17264866 | rs17291497 | rs1731951  | rs1734959  | rs1737894  | rs17409588 | rs17433710 | rs174556   |
| rs17265513 | rs17291908 | rs17319721 | rs17350191 | rs17379561 | rs1741     | rs17435    | rs174557   |
| rs17265703 | rs17292733 | rs1731993  | rs17351518 | rs17379854 | rs17410008 | rs17435937 | rs17455862 |
| rs17266097 | rs17292804 | rs17321041 | rs17352892 | rs1738050  | rs17410962 | rs174373   | rs174559   |
| rs1726625  | rs17293240 | rs17321073 | rs173539   | rs1738074  | rs17411031 | rs17437657 | rs174560   |
| rs17266357 | rs17293443 | rs17321108 | rs17354348 | rs17380837 | rs17411061 | rs17437668 | rs174561   |
| rs17266519 | rs17293632 | rs17321432 | rs17354370 | rs17381294 | rs17411339 | rs17437814 | rs174562   |
| rs17266887 | rs1729407  | rs17321447 | rs17354650 | rs17381406 | rs17412403 | rs17439448 | rs174564   |
| rs1726866  | rs1729412  | rs17321482 | rs1735546  | rs17381664 | rs17412738 | rs17439799 | rs174565   |
| rs17268785 | rs1729413  | rs17321515 | rs17355629 | rs17381914 | rs17412833 | rs17440885 | rs174566   |
| rs17268829 | rs17294280 | rs17321999 | rs17356664 | rs17382202 | rs1741288  | rs17441816 | rs174567   |
| rs17269348 | rs17294565 | rs17322191 | rs17356907 | rs17382303 | rs17413015 | rs17442317 | rs174568   |
| rs17270169 | rs17295246 | rs17322313 | rs17357122 | rs17382981 | rs1741314  | rs17442910 | rs174570   |
| rs17270216 | rs17295394 | rs17322427 | rs17357954 | rs1738386  | rs1741318  | rs17442937 | rs174572   |
| rs17270446 | rs1729549  | rs17324331 | rs1736013  | rs1738434  | rs1741344  | rs1744297  | rs17457340 |
| rs17271340 | rs1729578  | rs17324524 | rs1736020  | rs17384381 | rs17413465 | rs17443541 | rs174574   |
| rs17271883 | rs17296501 | rs1732579  | rs1736057  | rs1738475  | rs17414302 | rs17444059 | rs17457561 |
| rs17272637 | rs172966   | rs1732664  | rs1736060  | rs17386684 | rs1741464  | rs174448   | rs174576   |
| rs17272694 | rs17297226 | rs17326656 | rs1736089  | rs17386987 | rs17415296 | rs174455   | rs17457613 |
| rs1727284  | rs1729799  | rs17326895 | rs1736135  | rs17387279 | rs17416284 | rs17445665 | rs17457629 |
| rs17272847 | rs17298829 | rs173269   | rs1736147  | rs17387330 | rs17416285 | rs17445774 | rs174577   |
| rs1727294  | rs1729951  | rs17327362 | rs1736148  | rs17387886 | rs1741640  | rs17445836 | rs174578   |
| rs1727307  | rs1730008  | rs17328201 | rs1736150  | rs17388568 | rs1741663  | rs174464   | rs17457880 |
| rs1727313  | rs17300141 | rs17329170 | rs1736157  | rs17388803 | rs1741684  | rs17446418 | rs174580   |
| rs1727319  | rs1730028  | rs1732924  | rs17361668 | rs17389284 | rs17416934 | rs174465   | rs174581   |
| rs1727324  | rs173003   | rs17329882 | rs1736179  | rs17389644 | rs17417046 | rs174468   | rs174583   |
| rs1727326  | rs1730040  | rs17331151 | rs1736213  | rs17391694 | rs17417252 | rs17447211 | rs174584   |
| rs17274130 | rs1730054  | rs17331332 | rs17362588 | rs17391905 | rs17417407 | rs174473   | rs174590   |
| rs17274750 | rs17300741 | rs17331777 | rs17362923 | rs17393065 | rs17417989 | rs174476   | rs17459015 |
| rs17274880 | rs17300770 | rs17332320 | rs17363282 | rs17393344 | rs17420551 | rs174479   | rs174592   |
| rs17275866 | rs17302005 | rs17332376 | rs17363566 | rs17393468 | rs17420654 | rs17448682 | rs174594   |
| rs17276464 | rs17302081 | rs17333822 | rs1736426  | rs17395416 | rs17420882 | rs17448885 | rs174599   |
| rs17276527 | rs17302143 | rs17334002 | rs17364832 | rs17396055 | rs174213   | rs17449280 | rs174601   |
| rs17277127 | rs17302154 | rs17334919 | rs17365498 | rs17396340 | rs17421410 | rs1744947  | rs1746048  |
| rs17277546 | rs17302236 | rs17336368 | rs17365948 | rs17396357 | rs17421627 | rs1744947  | rs1746049  |
| rs17277932 | rs17302855 | rs173365   | rs17366139 | rs173964   | rs17421787 | rs17450122 | rs17460657 |
| rs17278406 | rs17303831 | rs17336718 | rs17366568 | rs17398137 | rs17421899 | rs17450273 | rs17461925 |
| rs17278665 | rs17304079 | rs1733724  | rs17366643 | rs17398575 | rs17422688 | rs17450294 | rs174621   |
| rs17278798 | rs173048   | rs1733760  | rs17367504 | rs17398913 | rs17423390 | rs17450430 | rs174621   |
| rs17279437 | rs17305573 | rs17338318 | rs17367725 | rs17399739 | rs17423748 | rs17450716 | rs17462354 |
| rs1727949  | rs17305868 | rs17339357 | rs17367750 | rs17400325 | rs17424286 | rs17451107 | rs17462448 |
| rs17280180 | rs17307280 | rs17339836 | rs17368443 | rs17400427 | rs17424324 | rs17451754 | rs17462630 |
| rs17280293 | rs173076   | rs17340351 | rs17368582 | rs17400517 | rs17424324 | rs174528   | rs17462641 |
| rs1728118  | rs17308476 | rs17340752 | rs173686   | rs17400517 | rs17424999 | rs174529   | rs17462893 |
| rs17281245 | rs1730851  | rs1734197  | rs173686   | rs1740073  | rs17425189 | rs174530   | rs17464221 |
| rs1728367  | rs1730859  | rs17342242 | rs17368659 | rs17401449 | rs17425572 | rs174532   | rs1746437  |
| rs1728380  | rs1730862  | rs17342717 | rs17368814 | rs17401735 | rs17425622 | rs174533   | rs17464492 |
| rs1728407  | rs1730865  | rs17343290 | rs17368890 | rs17401875 | rs17425707 | rs174534   | rs17464525 |
| rs17284524 | rs1730872  | rs1734370  | rs1736904  | rs17401966 | rs17426174 | rs174535   | rs17464772 |
| rs17284573 | rs17309350 | rs17345563 | rs17369123 | rs1740260  | rs17426269 | rs174536   | rs1746483  |
| rs17284587 | rs17309741 | rs17345800 | rs17369215 | rs17404153 | rs17427318 | rs174537   | rs17464835 |
| rs17284622 | rs17309825 | rs17346077 | rs17369400 | rs17404163 | rs1742741  | rs174538   | rs17465422 |
| rs17284876 | rs17309827 | rs17346300 | rs17369927 | rs174048   | rs17428076 | rs17453832 | rs17465637 |
| rs17284969 | rs17309874 | rs17346310 | rs17371253 | rs17405217 | rs17428393 | rs174541   | rs17465982 |
|            |            |            | rs17371926 | rs17405319 | rs17428471 | rs174544   | rs17466257 |

|            |            |            |            |              |            |            |            |
|------------|------------|------------|------------|--------------|------------|------------|------------|
| rs17466626 | rs17489282 | rs17520265 | rs17561950 | rs17589603   | rs17610395 | rs17632159 | rs17658908 |
| rs17467140 | rs17489300 | rs1752165  | rs17562391 | rs17590046   | rs17610659 | rs17632217 | rs17659437 |
| rs17467825 | rs17489373 | rs1752169  | rs1756281  | rs17591030   | rs17611770 | rs17632542 | rs17659514 |
| rs17470137 | rs17489649 | rs17522122 | rs17563    | rs17592366   | rs17612444 | rs17633311 | rs17659543 |
| rs17470924 | rs17490701 | rs17523008 | rs17563464 | rs17592462   | rs17612648 | rs17633959 | rs17659798 |
| rs17471509 | rs1749167  | rs17523630 | rs17563683 | rs17592479   | rs17612693 | rs1763398  | rs17659990 |
| rs17471974 | rs17492154 | rs17525033 | rs17563986 | rs17592552   | rs17612742 | rs17635778 | rs1766     |
| rs17472350 | rs17492269 | rs17525605 | rs17564336 | rs17594321   | rs17613287 | rs17636031 | rs17660708 |
| rs17472426 | rs1749268  | rs17526078 | rs17564829 | rs1759433    | rs17613339 | rs1763604  | rs17660913 |
| rs17472529 | rs1749352  | rs17526367 | rs17565975 | rs17594358   | rs17613465 | rs17636328 | rs17660992 |
| rs17472998 | rs1749405  | rs17527016 | rs17566828 | rs17595156   | rs17613838 | rs17636351 | rs17661015 |
| rs17473412 | rs17496249 | rs17528077 | rs17567417 | rs1759645    | rs17615090 | rs17637472 | rs17661137 |
| rs17474001 | rs17496332 | rs17529111 | rs17568389 | rs17596617   | rs17615220 | rs17638167 | rs17661843 |
| rs17474406 | rs174964   | rs17529509 | rs17568628 | rs17596722   | rs17615494 | rs17638867 | rs17661862 |
| rs17474942 | rs1749792  | rs17530068 | rs17568725 | rs17596995   | rs17616063 | rs1763908  | rs17662402 |
| rs1747522  | rs17498550 | rs17530191 | rs17569    | rs17597065   | rs1761617  | rs17639215 | rs17662822 |
| rs1747551  | rs17499351 | rs17530976 | rs175705   | rs17597230   | rs1761622  | rs17639982 | rs17663165 |
| rs17476364 | rs17499741 | rs17531405 | rs17570669 | rs17597773   | rs17616243 | rs17640804 | rs17663182 |
| rs1747714  | rs17500359 | rs17532098 | rs17570807 | rs17598132   | rs17616316 | rs176411   | rs17663555 |
| rs17477177 | rs17501002 | rs17532301 | rs17571122 | rs17598306   | rs17616365 | rs176413   | rs1766362  |
| rs174775   | rs17501007 | rs175325   | rs175714   | rs17598579   | rs17616434 | rs17641524 | rs17663869 |
| rs17477923 | rs17501090 | rs1753294  | rs17572109 | rs17598658   | rs17616464 | rs17641673 | rs176644   |
| rs1747817  | rs17501292 | rs17533219 | rs1757216  | rs17598675   | rs17616633 | rs17641971 | rs176647   |
| rs17478570 | rs17501820 | rs17533903 | rs17573010 | rs17598729   | rs17616642 | rs17642632 | rs17664743 |
| rs17479000 | rs17502934 | rs17533945 | rs17574007 | rs17598910   | rs17616661 | rs17643057 | rs17665139 |
| rs17479393 | rs175040   | rs17534001 | rs17574271 | rs17599026   | rs17616687 | rs17643207 | rs17665188 |
| rs17479566 | rs17504041 | rs17534004 | rs17574378 | rs17599071   | rs17617068 | rs17643262 | rs17666332 |
| rs17479840 | rs17504333 | rs17534048 | rs17574571 | rs17599599   | rs17617337 | rs17643634 | rs17666927 |
| rs1748041  | rs17504614 | rs17534202 | rs1757463  | rs17599629   | rs17618450 | rs17643734 | rs17667540 |
| rs17480616 | rs17504622 | rs17535749 | rs17574650 | rs1759977    | rs17618598 | rs17644283 | rs1766786  |
| rs17480656 | rs17505102 | rs17536    | rs1757471  | rs17600346   | rs1761870  | rs17645325 | rs17667932 |
| rs17481131 | rs17505589 | rs17536059 | rs1757476  | rs1760125    | rs1761875  | rs17645813 | rs1766803  |
| rs17481621 | rs17507216 | rs17536328 | rs17575798 | rs17601612   | rs17619012 | rs17646258 | rs17668272 |
| rs17481869 | rs17507300 | rs17536527 | rs17576323 | rs17601876   | rs17619860 | rs17646402 | rs17668356 |
| rs1748195  | rs17507554 | rs17536732 | rs17576589 | rs17602038   | rs17619973 | rs17646466 | rs17668708 |
| rs1748197  | rs17507577 | rs17537246 | rs17576594 | rs1760217    | rs17620999 | rs17646946 | rs17668846 |
| rs17482078 | rs17507636 | rs17539620 | rs17576688 | rs17602253   | rs17621345 | rs17647863 | rs17669032 |
| rs17482310 | rs1750785  | rs17539875 | rs17577073 | rs17602572   | rs176217   | rs17648524 | rs17669311 |
| rs17482472 | rs17508332 | rs17542254 | rs17577094 | rs17603856   | rs17621729 | rs17649553 | rs17669337 |
| rs17482753 | rs17508548 | rs175426   | rs17577369 | rs17603933   | rs176218   | rs17649609 | rs176694   |
| rs174829   | rs17509001 | rs1754349  | rs1757915  | rs17603945   | rs1762188  | rs1764975  | rs17669415 |
| rs17483466 | rs17510339 | rs17543668 | rs17580    | rs17604349   | rs17622152 | rs17649913 | rs17669543 |
| rs17483548 | rs17510563 | rs17543752 | rs17580614 | rs17604480   | rs17622378 | rs1765003  | rs17669546 |
| rs17483686 | rs17511102 | rs1754541  | rs17581137 | rs17604670   | rs17622379 | rs1765006  | rs17669584 |
| rs17483721 | rs1751242  | rs17546153 | rs17581525 | rs17605455   | rs17622517 | rs17650301 | rs17670280 |
| rs17483929 | rs1751287  | rs17547610 | rs17581728 | rs17605615   | rs17622606 | rs17650569 | rs17671611 |
| rs17484235 | rs1751299  | rs17548938 | rs17581884 | rs17606561   | rs17622656 | rs17650634 | rs17673793 |
| rs17484292 | rs17513135 | rs17550549 | rs1758205  | rs17606864   | rs17623373 | rs17650792 | rs1767447  |
| rs17484524 | rs17513503 | rs1755056  | rs1758206  | rs17607234   | rs1762509  | rs17650842 | rs17674580 |
| rs17484848 | rs17513613 | rs175510   | rs17582206 | rs17607347   | rs17625587 | rs17651119 | rs17675734 |
| rs17484960 | rs17513684 | rs17551064 | rs17582262 | rs17607589   | rs17625845 | rs1765139  | rs17676191 |
| rs17485347 | rs17514375 | rs17551090 | rs17582416 | rs17607787   | rs17626412 | rs17651507 | rs17676662 |
| rs17485419 | rs17514738 | rs17551974 | rs17583459 | rs1760801    | rs17626434 | rs1765174  | rs17677603 |
| rs17485664 | rs17514846 | rs17552787 | rs17583539 | rs17608150   | rs17626617 | rs17652394 | rs17677991 |
| rs17486195 | rs1751492  | rs17553262 | rs17583875 | rs17608413   | rs17627309 | rs17652520 | rs17678527 |
| rs17486278 | rs17515225 | rs17554326 | rs17584499 | rs17608459   | rs17628095 | rs17652784 | rs17678683 |
| rs17487    | rs17515485 | rs17554720 | rs17584626 | rs17608649   | rs17629735 | rs17653445 | rs17679259 |
| rs17487223 | rs17516020 | rs17554906 | rs17585072 | rs17608766   | rs17629956 | rs17653487 | rs17679410 |
| rs17487383 | rs17516256 | rs1755618  | rs17585295 | rs17608766-C | rs17630235 | rs17654410 | rs17680229 |
| rs17487484 | rs17516287 | rs17556717 | rs17585887 |              | rs17630248 | rs17654742 | rs17680712 |
| rs174877   | rs17516329 | rs17556750 | rs17585915 | rs17609108   | rs17630293 | rs17655548 | rs17680741 |
| rs17487792 | rs17516457 | rs1755685  | rs1758632  | rs17609240   | rs17630466 | rs17655730 | rs17680862 |
| rs17488036 | rs17517578 | rs17557610 | rs17587029 | rs17609255   | rs17630640 | rs17656017 | rs176813   |
| rs17488316 | rs17517928 | rs17559044 | rs17587226 | rs1760928    | rs17630758 | rs17656204 | rs17681353 |
| rs17488728 | rs17518584 | rs17559144 | rs1758747  | rs1760940    | rs17631303 | rs17656349 | rs17681451 |
| rs17489259 | rs17520121 | rs17561351 | rs17587609 | rs176095     | rs17631394 | rs17658229 | rs17681615 |
| rs17489268 | rs17520254 | rs17561924 | rs17588356 | rs17609940   | rs17631783 | rs1765871  | rs17681684 |

|            |            |            |            |                  |            |            |            |
|------------|------------|------------|------------|------------------|------------|------------|------------|
| rs1768208  | rs17706320 | rs1772719  | rs17756204 | rs17776482       | rs1780100  | rs1782170  | rs17843966 |
| rs17682575 | rs17706790 | rs1772720  | rs17756712 | rs17776547       | rs17801257 | rs1782179  | rs17844003 |
| rs17682747 | rs17707300 | rs17727474 | rs17757676 | rs17776563       | rs17801525 | rs17822102 | rs17844461 |
| rs17683011 | rs17708574 | rs17727765 | rs17757975 | rs17776719       | rs17802111 | rs17822114 | rs17844666 |
| rs17683430 | rs17708984 | rs17728    | rs17758391 | rs17776795       | rs17802375 | rs17822214 | rs17844492 |
| rs17683353 | rs17709034 | rs17728338 | rs17758695 | rs17779355       | rs17802463 | rs17822257 | rs17846866 |
| rs17684074 | rs17709487 | rs17728834 | rs17759083 | rs17779747       | rs1780324  | rs17823089 | rs1784692  |
| rs17684427 | rs17710008 | rs17729447 | rs17759204 | rs17779747-<br>T | rs1780329  | rs17823642 | rs17847676 |
| rs17685    | rs17710386 | rs1772976  | rs17759355 | rs17780048       | rs17803620 | rs17823744 | rs1784775  |
| rs17685306 | rs17711053 | rs17730281 | rs17759796 | rs17780086       | rs17803780 | rs17824247 | rs1784776  |
| rs1768584  | rs1771149  | rs17730436 | rs1776029  | rs17780086       | rs17804358 | rs17824620 | rs17849148 |
| rs17686238 | rs17711722 | rs17731    | rs1776050  | rs17780256       | rs1780437  | rs17824933 | rs17849501 |
| rs17686649 | rs17711997 | rs17732878 | rs17761723 | rs17780981       | rs17804499 | rs1782508  | rs17849502 |
| rs17687067 | rs1771200  | rs17733713 | rs17761864 | rs17781283       | rs17804660 | rs17825134 | rs1784987  |
| rs17687519 | rs1771201  | rs17733784 | rs1776209  | rs17781645       | rs17804800 | rs17825630 | rs17850433 |
| rs17687539 | rs17712080 | rs17734073 | rs17762342 | rs17782313       | rs17805214 | rs17826201 | rs17850756 |
| rs17688076 | rs17712705 | rs17736589 | rs17762452 | rs17782464       | rs1780617  | rs17826219 | rs17851970 |
| rs17688188 | rs17712720 | rs17737336 | rs17762454 | rs17782474       | rs17806224 | rs17826255 | rs17853159 |
| rs17688601 | rs17712835 | rs17737404 | rs1776270  | rs17783165       | rs17806299 | rs1782645  | rs17853284 |
| rs17688827 | rs17712868 | rs17737449 | rs17762811 | rs17783304       | rs17806888 | rs17826468 | rs1785418  |
| rs17688839 | rs17713040 | rs17737768 | rs17763769 | rs17783630       | rs1780706  | rs1782652  | rs17854357 |
| rs17688916 | rs17713514 | rs17737857 | rs17764067 | rs1778377        | rs17807116 | rs17826816 | rs17854914 |
| rs17689007 | rs17713729 | rs17738166 | rs17764723 | rs17784127       | rs17807185 | rs1782763  | rs17855177 |
| rs17689040 | rs17713879 | rs17739167 | rs17764730 | rs1778477        | rs17807624 | rs1782810  | rs17855611 |
| rs17689159 | rs17714046 | rs17739187 | rs17764831 | rs17784882       | rs17807909 | rs178282   | rs17855988 |
| rs17689595 | rs17714252 | rs17739590 | rs17764935 | rs17785077       | rs1780813  | rs17828731 | rs17857135 |
| rs17689879 | rs17714860 | rs17739820 | rs17765088 | rs17785382       | rs17808190 | rs17830011 | rs178597   |
| rs17689882 | rs17715065 | rs17740942 | rs17765311 | rs17785991       | rs17810229 | rs17830069 | rs17860282 |
| rs17689966 | rs1771582  | rs17741049 | rs17765344 | rs17786744       | rs17810376 | rs17830558 | rs17860428 |
| rs17690703 | rs17716179 | rs1774222  | rs17765610 | rs17786957       | rs17810415 | rs17831251 | rs1786070  |
| rs17691584 | rs17716331 | rs17742342 | rs17765886 | rs1778830        | rs17810546 | rs17831500 | rs17860955 |
| rs17691888 | rs17716478 | rs1774241  | rs17766168 | rs17788930       | rs17811450 | rs17831525 | rs17860967 |
| rs17691999 | rs17716502 | rs177430   | rs17766287 | rs17788937       | rs17812823 | rs17831536 | rs17861031 |
| rs17692129 | rs17716942 | rs17743054 | rs1776631  | rs1778904        | rs17813294 | rs17831815 | rs178618   |
| rs17692629 | rs17717583 | rs17743415 | rs17766692 | rs17789218       | rs17813412 | rs17832737 | rs17862367 |
| rs17692648 | rs17718288 | rs17743593 | rs17767210 | rs17789506       | rs17813588 | rs17833704 | rs1786263  |
| rs17692864 | rs17718387 | rs17744051 | rs17767392 | rs17789520       | rs17814604 | rs17833752 | rs17862875 |
| rs17693325 | rs17718444 | rs17744603 | rs17767398 | rs17789629       | rs17814633 | rs17833789 | rs17863107 |
| rs17693945 | rs17718586 | rs17747324 | rs17767419 | rs17790352       | rs17816356 | rs17834014 | rs1786313  |
| rs17693963 | rs17718828 | rs17747544 | rs17767445 | rs17790482       | rs17816465 | rs17834032 | rs17863787 |
| rs17694108 | rs17718831 | rs17747955 | rs17767662 | rs17790804       | rs178165   | rs17834080 | rs17864701 |
| rs17694493 | rs17719345 | rs17748153 | rs17767678 | rs17791208       | rs17816693 | rs17834140 | rs1786573  |
| rs17694933 | rs17720193 | rs17748165 | rs17767742 | rs17791483       | rs17817004 | rs17834563 | rs1786595  |
| rs17695092 | rs17720293 | rs17748359 | rs1776776  | rs17791513       | rs17817077 | rs1783541  | rs17866443 |
| rs17695127 | rs17720594 | rs17749155 | rs1776883  | rs177917         | rs17817288 | rs17835714 | rs17868256 |
| rs17695224 | rs17720922 | rs17749202 | rs1776884  | rs177918         | rs17817449 | rs1783591  | rs1787003  |
| rs17696696 | rs1772143  | rs17749561 | rs1776897  | rs17794023       | rs17817600 | rs17836088 | rs1787013  |
| rs17696736 | rs17721822 | rs1775118  | rs17769552 | rs1779427        | rs17817628 | rs17836155 | rs1787087  |
| rs1769758  | rs1772189  | rs1775148  | rs17770336 | rs1779431        | rs17817964 | rs17836662 | rs178710   |
| rs17698176 | rs17722107 | rs17752199 | rs17770672 | rs1779549        | rs17817995 | rs17836934 | rs1787200  |
| rs17698580 | rs17722795 | rs17752365 | rs17770675 | rs17795934       | rs17818197 | rs1783803  | rs1787267  |
| rs17698823 | rs17723470 | rs1775255  | rs17770752 | rs17796225       | rs17818263 | rs1783827  | rs1787328  |
| rs17699030 | rs17724467 | rs177529   | rs17771137 | rs17796777       | rs178183   | rs1783835  | rs17875533 |
| rs17699089 | rs17724508 | rs17753641 | rs1777242  | rs17796783       | rs17818393 | rs17838698 | rs17876031 |
| rs17699658 | rs17724534 | rs1775370  | rs17772583 | rs17796831       | rs178184   | rs17838730 | rs17876044 |
| rs1770     | rs17724992 | rs17753769 | rs1777277  | rs17797222       | rs17819222 | rs1783978  | rs178761   |
| rs17700028 | rs17724993 | rs17754    | rs17772814 | rs17797603       | rs17819300 | rs17841547 | rs1787663  |
| rs17700144 | rs177251   | rs17754109 | rs17773169 | rs1779774        | rs17819328 | rs17841683 | rs17878498 |
| rs17700436 | rs17725170 | rs177542   | rs17773190 | rs1779809        | rs17819597 | rs1784203  | rs178785   |
| rs17700466 | rs17725246 | rs17754780 | rs17773370 | rs177992         | rs17819973 | rs17842602 | rs1787864  |
| rs17700884 | rs17725600 | rs17754910 | rs17773430 | rs17799476       | rs17820119 | rs17843569 | rs17878931 |
| rs17700977 | rs1772570  | rs17755079 | rs17773630 | rs17799796       | rs178203   | rs17843577 | rs17879961 |
| rs17702602 | rs1772572  | rs1775550  | rs17773854 | rs178004         | rs1782032  | rs17843580 | rs1788030  |
| rs17702912 | rs17726276 | rs1775553  | rs17773903 | rs17800640       | rs17820549 | rs17843604 | rs1788097  |
| rs17703354 | rs17726337 | rs1775554  | rs17775170 | rs17800727       | rs17820772 | rs17843626 | rs17880989 |
| rs17703883 | rs17726577 | rs17755849 | rs17775184 | rs17800987       | rs17820943 | rs17843707 | rs178810   |
| rs177045   | rs17727049 | rs17756073 | rs17776015 | rs178010         | rs17821159 | rs17843797 | rs17881016 |

## Supplemental Online Material

|            |           |             |             |             |             |             |             |
|------------|-----------|-------------|-------------|-------------|-------------|-------------|-------------|
| rs1788103  | rs1794849 | rs1800472   | rs180242    | rs180868838 | rs181288    | rs181823181 | rs1822298   |
| rs1788105  | rs1795061 | rs1800562   | rs180253    | rs180869103 | rs181292    | rs1818275   | rs182234180 |
| rs17881575 | rs1795379 | rs1800566   | rs1802575   | rs180874045 | rs1813006   | rs181831514 | rs1822365   |
| rs1788161  | rs179570  | rs1800574   | rs180326    | rs1809051   | rs181309710 | rs181832503 | rs182244780 |
| rs17881696 | rs1796330 | rs1800588   | rs1803274   | rs180908923 | rs181325352 | rs181837942 | rs1822489   |
| rs17882603 | rs1796419 | rs1800594   | rs1803275   | rs180912    | rs181331502 | rs1818444   | rs1822518   |
| rs17882753 | rs1796518 | rs1800601   | rs180349    | rs180913    | rs1813337   | rs181846593 | rs1822534   |
| rs17882802 | rs1797052 | rs1800615   | rs180360    | rs180921974 | rs1813353   | rs181853315 | rs182264490 |
| rs17883331 | rs1797081 | rs1800625   | rs1804080   | rs180930492 | rs1813375   | rs1818690   | rs182265848 |
| rs178835   | rs179744  | rs1800629   | rs1804182   | rs1809357   | rs181337907 | rs181869920 | rs182271072 |
| rs17883557 | rs179771  | rs1800634   | rs180435    | rs180936053 | rs181347    | rs1818782   | rs1822841   |
| rs17884405 | rs1797849 | rs180067    | rs180438    | rs180940    | rs181359    | rs181880988 | rs182298754 |
| rs17884466 | rs179785  | rs1800674   | rs1804527   | rs180940944 | rs181360    | rs181881383 | rs1823068   |
| rs17884691 | rs1797885 | rs1800682   | rs1805005   | rs180941    | rs181361    | rs1818917   | rs182311061 |
| rs1788493  | rs1797912 | rs1800692   | rs1805006   | rs180942    | rs181361216 | rs1819008   | rs1823125   |
| rs17884930 | rs1799068 | rs1800693   | rs1805007   | rs180943    | rs181362    | rs1819033   | rs182314334 |
| rs17885785 | rs1799123 | rs1800715   | rs1805008   | rs1809498   | rs1813760   | rs1819043   | rs182317    |
| rs1788641  | rs1799247 | rs1800730   | rs1805009   | rs180950758 | rs181383036 | rs181908897 | rs1823289   |
| rs17887074 | rs1799464 | rs1800754   | rs1805017   | rs180956060 | rs1813903   | rs1819154   | rs182337697 |
| rs17887160 | rs1799507 | rs1800759   | rs1805096   | rs180958289 | rs1813937   | rs181929163 | rs182346790 |
| rs1788783  | rs1799777 | rs180077    | rs1805106   | rs180958337 | rs181394846 | rs1819333   | rs182355396 |
| rs1788784  | rs1799802 | rs1800775   | rs1805123   | rs180963    | rs1814032   | rs181937009 | rs182363    |
| rs1788799  | rs1799805 | rs1800777   | rs1805123-G | rs180977001 | rs181404049 | rs1819436   | rs182375344 |
| rs1788808  | rs1799807 | rs1800788   | rs1805126   | rs1809803   | rs1814175   | rs181946711 | rs1823778   |
| rs1788820  | rs1799810 | rs1800789   | rs1805128   | rs1809889   | rs181438735 | rs181948526 | rs182387400 |
| rs1789     | rs1799815 | rs1800795   | rs1805207   | rs180994755 | rs181451002 | rs1819564   | rs182420    |
| rs1789063  | rs1799831 | rs1800797   | rs1805248   | rs181000569 | rs1814576   | rs1819575   | rs182429    |
| rs1789166  | rs1799852 | rs1800813   | rs1805313   | rs1810193   | rs1814701   | rs1819658   | rs182429465 |
| rs1789567  | rs1799853 | rs1800828   | rs1805404   | rs181026394 | rs1814813   | rs181969679 | rs182451845 |
| rs1789882  | rs1799864 | rs1800871   | rs1805419   | rs1810396   | rs181481353 | rs181977858 | rs182472492 |
| rs1789891  | rs1799884 | rs1800888   | rs1805508   | rs181042823 | rs1814982   | rs181978376 | rs182480358 |
| rs1789892  | rs1799895 | rs1800907   | rs1805740   | rs181043390 | rs181508347 | rs1819844   | rs182484222 |
| rs1789953  | rs1799899 | rs1800919   | rs1805741   | rs1810502   | rs1815198   | rs181986557 | rs182491379 |
| rs1790086  | rs179992  | rs1800932   | rs1806153   | rs1810868   | rs1815314   | rs1819953   | rs182498200 |
| rs1790089  | rs1799922 | rs1800947   | rs1806236   | rs1811069   | rs181534489 | rs182002046 | rs182518743 |
| rs1790105  | rs179994  | rs1800961   | rs1806269   | rs1811197   | rs181534711 | rs1820083   | rs182520855 |
| rs1790165  | rs1799941 | rs1800973   | rs1806559   | rs181124723 | rs181553    | rs1820177   | rs1825307   |
| rs1790187  | rs1799945 | rs1800977   | rs1806656   | rs1811371   | rs1815532   | rs1820351   | rs182543447 |
| rs1790373  | rs1799949 | rs1800978   | rs180682174 | rs181143083 | rs1815591   | rs182043430 | rs182546302 |
| rs1790534  | rs1799955 | rs1801020   | rs180686303 | rs181157443 | rs181559417 | rs182049218 | rs182549    |
| rs1790576  | rs1799958 | rs180107    | rs1806895   | rs181170661 | rs1815614   | rs182050989 | rs182552482 |
| rs1790588  | rs1799962 | rs1801085   | rs1806980   | rs1811711   | rs181563076 | rs182052    | rs182552845 |
| rs1790607  | rs1799963 | rs1801133   | rs180712105 | rs181173530 | rs1815739   | rs182055959 | rs182557857 |
| rs1790761  | rs1799964 | rs1801144   | rs1807214   | rs1811739   | rs1815823   | rs182059586 | rs1825733   |
| rs1790946  | rs1799969 | rs1801212   | rs1807304   | rs181179170 | rs181598957 | rs1820789   | rs1825734   |
| rs1790963  | rs1799971 | rs1801214   | rs180751906 | rs181179291 | rs181601681 | rs182082076 | rs1826063   |
| rs179145   | rs1799983 | rs1801222   | rs1807582   | rs181181625 | rs181609621 | rs182087722 | rs182616603 |
| rs179146   | rs1799990 | rs1801239   | rs180758259 | rs1811899   | rs181616813 | rs182089148 | rs182622154 |
| rs1791679  | rs180001  | rs1801248   | rs1807586   | rs181203    | rs181617194 | rs1820934   | rs1826347   |
| rs1792354  | rs1800024 | rs1801251   | rs180762722 | rs181205    | rs1816173   | rs182095422 | rs182636083 |
| rs179256   | rs1800056 | rs1801253   | rs180765625 | rs181206    | rs181631645 | rs1820989   | rs182638776 |
| rs1792602  | rs1800057 | rs1801265   | rs1807675   | rs181207    | rs1816522   | rs1821002   | rs182662555 |
| rs1792709  | rs180009  | rs1801272   | rs1807726   | rs181209    | rs1816537   | rs182102769 | rs182665950 |
| rs1792722  | rs1800189 | rs1801274   | rs180776515 | rs181214    | rs181669    | rs182103652 | rs182668686 |
| rs1793636  | rs180020  | rs1801282   | rs180778602 | rs1812175   | rs1816959   | rs182120    | rs1826787   |
| rs1793639  | rs1800282 | rs1801516   | rs1807797   | rs181220614 | rs181698387 | rs1821295   | rs182679717 |
| rs1793889  | rs1800347 | rs1801591   | rs180803    | rs1812264   | rs181703235 | rs182152244 | rs1826947   |
| rs1793911  | rs1800389 | rs1801645   | rs1808056   | rs1812329   | rs181705462 | rs182175540 | rs182700961 |
| rs1793937  | rs1800404 | rs1801689   | rs180807105 | rs181253980 | rs181718607 | rs182185394 | rs182714900 |
| rs1793958  | rs1800407 | rs1801690   | rs1808192   | rs181255261 | rs181732329 | rs182187235 | rs182720683 |
| rs179405   | rs1800435 | rs1801706   | rs180819997 | rs1812587   | rs181743661 | rs182193570 | rs182722517 |
| rs1794275  | rs1800437 | rs1801725   | rs180825777 | rs1812594   | rs181745297 | rs182197129 | rs1827293   |
| rs1794280  | rs1800440 | rs1801725-T | rs1808333   | rs181269956 | rs181752889 | rs1822067   | rs182734535 |
| rs1794282  | rs1800449 | rs1802127   | rs1808382   | rs1812707   | rs181768270 | rs1822105   | rs182740066 |
| rs179468   | rs1800451 | rs1802295   | rs1808579   | rs181275126 | rs181771244 | rs1822201   | rs1827510   |
| rs1794735  | rs1800469 | rs180238    | rs1808596   | rs1812755   | rs181798723 | rs1822246   | rs1827540   |
| rs1794818  | rs1800470 | rs180239    | rs1808629   | rs1812835   | rs181807530 | rs1822273   | rs182765975 |

|             |             |             |             |             |             |             |             |
|-------------|-------------|-------------|-------------|-------------|-------------|-------------|-------------|
| rs182770070 | rs183203602 | rs183757472 | rs1842076   | rs1846946   | rs185122378 | rs185616    | rs186021206 |
| rs182776276 | rs183207557 | rs1837636   | rs1842202   | rs184694823 | rs185128671 | rs1856293   | rs1860302   |
| rs182782800 | rs183208454 | rs1837680   | rs1842413   | rs1846967   | rs1851292   | rs185630440 | rs1860380   |
| rs182788815 | rs183211    | rs183772362 | rs184243355 | rs1846974   | rs185139895 | rs185639574 | rs1860509   |
| rs182795071 | rs183218863 | rs183783019 | rs184260005 | rs184700722 | rs185146    | rs185645716 | rs186053156 |
| rs182797772 | rs183228067 | rs183790625 | rs184265581 | rs184701424 | rs185155428 | rs185649211 | rs1860545   |
| rs182804464 | rs183230709 | rs1837988   | rs184267824 | rs1847053   | rs185177474 | rs1856502   | rs186065533 |
| rs182812355 | rs183241934 | rs1838105   | rs1842713   | rs184710845 | rs185182198 | rs185658283 | rs1860661   |
| rs1828385   | rs1832777   | rs183811190 | rs184277845 | rs1847134   | rs1851823   | rs1856765   | rs1860826   |
| rs1828481   | rs1832871   | rs1838149   | rs184278183 | rs1847202   | rs1852006   | rs185686655 | rs1861026   |
| rs1828590   | rs1832886   | rs183815186 | rs1842896   | rs184721335 | rs185206099 | rs185689480 | rs1861072   |
| rs1828591   | rs183295481 | rs183816209 | rs184291421 | rs184723794 | rs185207145 | rs185689513 | rs1861090   |
| rs182879407 | rs1833070   | rs183819925 | rs184297073 | rs184728178 | rs1852148   | rs185690892 | rs1861100   |
| rs1828803   | rs183312687 | rs183821586 | rs184314239 | rs1847331   | rs185244    | rs185693786 | rs186110295 |
| rs1828853   | rs183315407 | rs183826639 | rs184330259 | rs184739375 | rs185253449 | rs185695143 | rs1861116   |
| rs1828911   | rs183321458 | rs183831772 | rs184332034 | rs1847472   | rs185254058 | rs1857066   | rs1861145   |
| rs182891158 | rs1833288   | rs1838337   | rs184334219 | rs184765639 | rs1852599   | rs1857095   | rs1861148   |
| rs182894584 | rs1833289   | rs1838420   | rs184339396 | rs184803346 | rs185262229 | rs185717927 | rs1861151   |
| rs182898363 | rs183335240 | rs183843320 | rs184340784 | rs184829860 | rs1852679   | rs1857237   | rs1861245   |
| rs182902112 | rs183347927 | rs1838564   | rs184354242 | rs1848347   | rs1852684   | rs185765    | rs1861246   |
| rs182908437 | rs183350    | rs183856666 | rs184371102 | rs1848460   | rs185281125 | rs1857859   | rs186127900 |
| rs182911102 | rs183360145 | rs183869217 | rs184374109 | rs184847416 | rs185285034 | rs1857901   | rs186129480 |
| rs182917452 | rs183360924 | rs183882582 | rs1843815   | rs1848510   | rs185291    | rs185799410 | rs186131752 |
| rs1829276   | rs183373024 | rs183890038 | rs184384746 | rs184853555 | rs185291443 | rs1858001   | rs1861353   |
| rs182948919 | rs183393610 | rs1839069   | rs1843888   | rs184859844 | rs1852922   | rs1858036   | rs1861386   |
| rs1829526   | rs183400320 | rs183906992 | rs184389714 | rs1848599   | rs1852985   | rs1858037   | rs1861398   |
| rs182968886 | rs183401583 | rs1839261   | rs184392414 | rs1848793   | rs185299109 | rs1858074   | rs1861410   |
| rs182973285 | rs183403564 | rs1839266   | rs184392658 | rs1848797   | rs185308415 | rs1858111   | rs1861412   |
| rs182975328 | rs1834144   | rs183937294 | rs1843935   | rs184901441 | rs1853207   | rs185819    | rs1861435   |
| rs1829813   | rs183421746 | rs183966199 | rs1843938   | rs184904296 | rs185350    | rs18582     | rs1861628   |
| rs182981601 | rs183424609 | rs183975233 | rs184395229 | rs184907858 | rs185355701 | rs1858242   | rs186166891 |
| rs1829838   | rs183427010 | rs183978373 | rs184405367 | rs184909362 | rs1853573   | rs185827463 | rs186167801 |
| rs182996269 | rs1834306   | rs183978498 | rs184409696 | rs184920307 | rs185361    | rs185829646 | rs1861760   |
| rs182996728 | rs1834481   | rs183979857 | rs184412496 | rs184926585 | rs1853655   | rs185838353 | rs1861777   |
| rs1830035   | rs1834640   | rs183995738 | rs184457    | rs1849275   | rs1853665   | rs185853718 | rs1861786   |
| rs1830074   | rs183464040 | rs184017    | rs1844594   | rs1849496   | rs185373991 | rs1858610   | rs186183604 |
| rs1830079   | rs1834650   | rs1840221   | rs184469050 | rs184950714 | rs185374745 | rs185862045 | rs1861881   |
| rs1830084   | rs183511413 | rs184024562 | rs184472829 | rs184953495 | rs185378533 | rs1858800   | rs186192004 |
| rs183015141 | rs183522757 | rs184024600 | rs184474769 | rs184956398 | rs1853837   | rs1858889   | rs1861979   |
| rs183018167 | rs1835339   | rs184033703 | rs1844776   | rs184958517 | rs185386680 | rs185898    | rs1862069   |
| rs1830298   | rs1835346   | rs184065563 | rs184479020 | rs184962666 | rs185387034 | rs185900616 | rs1862162   |
| rs1830321   | rs183553104 | rs1840660   | rs184488658 | rs184964366 | rs185392832 | rs185901280 | rs186218230 |
| rs183032784 | rs1835740   | rs184069239 | rs1844983   | rs1849685   | rs185398268 | rs185903930 | rs1862205   |
| rs183034862 | rs1835873   | rs184079650 | rs1845018   | rs184977442 | rs185402687 | rs1859100   | rs186222325 |
| rs183041    | rs1835874   | rs184081583 | rs1845034   | rs184981897 | rs185403618 | rs185912594 | rs186229361 |
| rs1830610   | rs183600932 | rs1840847   | rs184509201 | rs184989294 | rs185405908 | rs1859161   | rs186230002 |
| rs183066049 | rs1836229   | rs184088518 | rs184521656 | rs185004002 | rs185414370 | rs1859164   | rs1862362   |
| rs183078    | rs183657985 | rs1840969   | rs184538485 | rs185004749 | rs185433896 | rs1859165   | rs1862451   |
| rs1830790   | rs183661447 | rs184099286 | rs1845529   | rs185030778 | rs185449237 | rs1859168   | rs1862499   |
| rs183091609 | rs183669222 | rs1841023   | rs184562466 | rs185031519 | rs1854671   | rs1859259   | rs186255824 |
| rs183093970 | rs183671    | rs1841025   | rs184575290 | rs185038874 | rs185470895 | rs1859270   | rs1862626   |
| rs1830951   | rs183672138 | rs184112086 | rs184587444 | rs1850421   | rs1854788   | rs1859279   | rs186268843 |
| rs1831031   | rs183677610 | rs1841128   | rs184589612 | rs185044544 | rs185481756 | rs185934663 | rs1862719   |
| rs183113788 | rs183686    | rs184123737 | rs1845900   | rs185048405 | rs1854853   | rs1859434   | rs186272630 |
| rs1831149   | rs183686347 | rs184128865 | rs1846158   | rs185053056 | rs185511413 | rs1859440   | rs186278057 |
| rs183117027 | rs1837016   | rs184140292 | rs184621768 | rs185065    | rs185511771 | rs185949673 | rs186278890 |
| rs1831282   | rs183708046 | rs1841436   | rs184622626 | rs185071033 | rs185515630 | rs1859601   | rs186291940 |
| rs183130    | rs1837095   | rs1841439   | rs184634289 | rs185073199 | rs185523698 | rs185963    | rs186298790 |
| rs183131780 | rs1837164   | rs184145372 | rs184639867 | rs185073832 | rs185566659 | rs1859690   | rs1863114   |
| rs183139656 | rs183716729 | rs184148048 | rs184640919 | rs1850751   | rs185570139 | rs1859728   | rs1863115   |
| rs1831405   | rs183717966 | rs184151713 | rs184650103 | rs1850756   | rs185575165 | rs1859788   | rs1863127   |
| rs1831539   | rs183725    | rs184153866 | rs1846593   | rs1850890   | rs185580150 | rs1859962   | rs1863161   |
| rs183159852 | rs1837253   | rs1841625   | rs1846594   | rs1851024   | rs185581    | rs1859979   | rs1863176   |
| rs1831733   | rs1837269   | rs1841677   | rs184660829 | rs185111230 | rs185596670 | rs186001783 | rs1863190   |
| rs1831902   | rs183736659 | rs1841695   | rs184689679 | rs185115434 | rs185597083 | rs186005582 | rs1863219   |
| rs1831977   | rs1837372   | rs184183165 | rs1846899   | rs185120584 | rs185598871 | rs186006155 | rs1863244   |
| rs1832007   | rs1837495   | rs1842024   | rs184694238 | rs185120612 | rs185601339 | rs1860129   | rs1863245   |

|             |             |             |             |             |             |             |             |
|-------------|-------------|-------------|-------------|-------------|-------------|-------------|-------------|
| rs1863329   | rs186699271 | rs187104447 | rs1874458   | rs1878668   | rs188284312 | rs188539274 | rs1889312   |
| rs186344461 | rs186725382 | rs187112398 | rs1874467   | rs1878825   | rs1882961   | rs188539658 | rs1889571   |
| rs186351547 | rs1867312   | rs1871131   | rs187449369 | rs1878905   | rs1883025   | rs1885429   | rs188967368 |
| rs186356272 | rs186739251 | rs1871190   | rs187453635 | rs1879154   | rs188303909 | rs1885486   | rs1889714   |
| rs186357284 | rs1867409   | rs187119650 | rs1874581   | rs187918276 | rs1883067   | rs1885525   | rs188973463 |
| rs1863600   | rs186749    | rs187130073 | rs1874832   | rs1879250   | rs188310489 | rs188575585 | rs188974863 |
| rs1863622   | rs186757318 | rs1871329   | rs1874886   | rs187925403 | rs1883133   | rs1885949   | rs188975460 |
| rs186369938 | rs1867598   | rs187136683 | rs1874942   | rs187941554 | rs188315257 | rs1885983   | rs188982745 |
| rs1863716   | rs1867624   | rs1871395   | rs1874984   | rs1879454   | rs1883215   | rs1886008   | rs1889921   |
| rs1863758   | rs186768855 | rs187150787 | rs187503377 | rs1879529   | rs1883216   | rs188608977 | rs1890010   |
| rs186380042 | rs1867708   | rs1871541   | rs187509276 | rs187955356 | rs1883282   | rs1886205   | rs189007515 |
| rs186386113 | rs186781917 | rs187163948 | rs1875102   | rs1879586   | rs1883414   | rs188631178 | rs1890132   |
| rs186399184 | rs1867877   | rs1871665   | rs1875140   | rs187961334 | rs1883415   | rs1886450   | rs1890184   |
| rs1864046   | rs1868069   | rs1871674   | rs1875163   | rs187968503 | rs1883638   | rs1886512   | rs1890262   |
| rs186407552 | rs186806998 | rs187171029 | rs1875263   | rs187971642 | rs188370147 | rs1886512-A | rs1890408   |
| rs1864132   | rs186808413 | rs1871729   | rs187548445 | rs1879752   | rs1883711   | rs1886603   | rs1890426   |
| rs1864163   | rs1868175   | rs1871742   | rs187555279 | rs187976596 | rs1883730   | rs1886605   | rs189043356 |
| rs1864167   | rs1868274   | rs1871744   | rs1875560   | rs1879877   | rs1883758   | rs1886654   | rs189049    |
| rs1864216   | rs1868289   | rs187174553 | rs1875632   | rs1879888   | rs1883783   | rs1886700   | rs189052    |
| rs186430430 | rs1868346   | rs187175740 | rs187568415 | rs187996666 | rs188378669 | rs188671617 | rs189060489 |
| rs1864309   | rs1868385   | rs1871859   | rs1875763   | rs188004381 | rs1883801   | rs1886748   | rs1890683   |
| rs1864325   | rs1868513   | rs1871946   | rs187580    | rs1880088   | rs188380356 | rs1886764   | rs189071385 |
| rs1864400   | rs186854840 | rs1872167   | rs187585530 | rs188015    | rs1883832   | rs1886773   | rs1890946   |
| rs186441690 | rs186856025 | rs187222839 | rs1875968   | rs1880241   | rs1883932   | rs1886914   | rs1890995   |
| rs186454026 | rs1868582   | rs187255127 | rs1876      | rs188028380 | rs188393352 | rs1887004   | rs1891002   |
| rs186456786 | rs1868583   | rs1872552   | rs1876001   | rs1880381   | rs1883991   | rs188709583 | rs1891058   |
| rs1864585   | rs1868673   | rs1872556   | rs187607506 | rs188060308 | rs188402627 | rs1887103   | rs189107782 |
| rs186459505 | rs186872766 | rs187256434 | rs187620717 | rs1880692   | rs188403275 | rs188714751 | rs1891110   |
| rs1864729   | rs186873296 | rs1872632   | rs1876258   | rs188074962 | rs1884051   | rs1887252   | rs1891196   |
| rs1864774   | rs1868752   | rs1872635   | rs1876281   | rs188076989 | rs188411183 | rs1887316   | rs1891198   |
| rs1864896   | rs186876435 | rs1872636   | rs187630    | rs1880842   | rs188411703 | rs1887318   | rs1891215   |
| rs186493621 | rs186881826 | rs1872691   | rs1876359   | rs1880887   | rs1884123   | rs1887320   | rs1891248   |
| rs1865063   | rs1868912   | rs187270959 | rs1876487   | rs1880889   | rs1884139   | rs188740444 | rs189126230 |
| rs1865065   | rs186897112 | rs187282666 | rs187649293 | rs1880909   | rs188420713 | rs1887407   | rs1891273   |
| rs186507655 | rs186897198 | rs1872930   | rs187651195 | rs188092014 | rs188427350 | rs1887428   | rs1891275   |
| rs186513784 | rs186905936 | rs187293782 | rs1876518   | rs188092667 | rs188428283 | rs1887430   | rs189129074 |
| rs1865223   | rs1869073   | rs1872981   | rs187653072 | rs188099135 | rs1884302   | rs1887489   | rs1891392   |
| rs1865249   | rs186915841 | rs1872992   | rs187673688 | rs1881193   | rs1884352   | rs188761057 | rs189152021 |
| rs1865341   | rs1869165   | rs1873027   | rs187680191 | rs188132769 | rs188437955 | rs188761458 | rs1891556   |
| rs1865343   | rs1869244   | rs1873128   | rs1876829   | rs188137993 | rs1884389   | rs1887639   | rs1891621   |
| rs186544372 | rs186933756 | rs187319357 | rs1876905   | rs1881396   | rs1884429   | rs1887704   | rs189162117 |
| rs186558953 | rs186975    | rs1873212   | rs187696124 | rs1881396   | rs1884429   | rs1887704   | rs189162117 |
| rs186561556 | rs1869800   | rs187325356 | rs1876985   | rs188140481 | rs1884507   | rs188775815 | rs1891730   |
| rs186567375 | rs1869862   | rs187327935 | rs1877030   | rs1881492   | rs1884589   | rs188778252 | rs1891732   |
| rs1865680   | rs186987935 | rs187328863 | rs1877031   | rs188149780 | rs188460188 | rs188779336 | rs1891906   |
| rs186568031 | rs1869959   | rs1873379   | rs1877075   | rs1881502   | rs188468174 | rs188789342 | rs1891946   |
| rs1865719   | rs186996510 | rs1873465   | rs1877139   | rs1881505   | rs188475040 | rs1887917   | rs1892094   |
| rs1865760   | rs1870028   | rs187355703 | rs1877312   | rs1881668   | rs1884762   | rs1888072   | rs189213544 |
| rs1865761   | rs1870071   | rs1873625   | rs187744216 | rs188172955 | rs188480917 | rs188810024 | rs1892171   |
| rs1865803   | rs1870123   | rs1873665   | rs1877558   | rs1881878   | rs188482600 | rs188810925 | rs1892172   |
| rs186586197 | rs1870125   | rs187368135 | rs187766969 | rs188190243 | rs188488867 | rs1888341   | rs189218934 |
| rs1865955   | rs1870140   | rs187370584 | rs187768945 | rs188192    | rs1884897   | rs188837888 | rs1892203   |
| rs186606513 | rs187021028 | rs187370584 | rs18777712  | rs1881973   | rs1884902   | rs188838036 | rs189223547 |
| rs1866188   | rs187028    | rs187370608 | rs18777712  | rs1882      | rs1884903   | rs188839109 | rs1892249   |
| rs186658310 | rs1870293   | rs1873774   | rs1877723   | rs1882206   | rs1884953   | rs188845491 | rs1892250   |
| rs1866706   | rs1870571   | rs187386252 | rs187786174 | rs188225138 | rs1885013   | rs1888488   | rs1892252   |
| rs186673610 | rs1870634   | rs1873958   | rs1877875   | rs188227250 | rs1885041   | rs1888560   | rs189231963 |
| rs1866745   | rs187067151 | rs1873982   | rs187799739 | rs1882289   | rs1885073   | rs1888562   | rs1892350   |
| rs1866750   | rs1870676   | rs187404828 | rs1877998   | rs1882419   | rs1885120   | rs1888693   | rs1892419   |
| rs1866755   | rs1870735   | rs1874124   | rs1878036   | rs188247550 | rs188512985 | rs1888765   | rs1892423   |
| rs1866758   | rs187084    | rs1874142   | rs1878406   | rs1882510   | rs188514326 | rs188878307 | rs1892490   |
| rs186675820 | rs1870927   | rs187416346 | rs187843643 | rs188251563 | rs1885194   | rs1888909   | rs1892534   |
| rs186680008 | rs1870931   | rs1874202   | rs187848990 | rs1882538   | rs188522023 | rs188911122 | rs1892548   |
| rs1866823   | rs1870940   | rs187429064 | rs187852559 | rs188255148 | rs1885234   | rs188911996 | rs189263035 |
| rs186689484 | rs1870940   | rs1874344   | rs1878526   | rs188255466 | rs1885245   | rs1889124   | rs189267552 |
| rs186692714 | rs187097936 | rs187437    | rs1878528   | rs188263039 | rs1885290   | rs188915802 | rs189268208 |
| rs186696265 | rs187100239 | rs187443429 | rs187856913 | rs1882642   | rs188533234 | rs188917216 | rs1892954   |
|             |             | rs187443664 | rs187857589 | rs188274086 | rs1885376   | rs188926264 | rs189298483 |

|             |             |             |             |             |             |             |             |
|-------------|-------------|-------------|-------------|-------------|-------------|-------------|-------------|
| rs189309686 | rs189798425 | rs1903002   | rs190853916 | rs1913808   | rs1919309   | rs192386132 | rs192822960 |
| rs1893217   | rs189806022 | rs1903003   | rs1908557   | rs191392302 | rs1919346   | rs192412418 | rs1928243   |
| rs1893224   | rs1898165   | rs190303734 | rs190865136 | rs1914037   | rs191945075 | rs192425108 | rs1928244   |
| rs1893261   | rs1898198   | rs1903068   | rs1908671   | rs191448232 | rs1919480   | rs192427471 | rs192829047 |
| rs1893323   | rs189821701 | rs190361203 | rs1908795   | rs191448950 | rs191960441 | rs192436652 | rs1928295   |
| rs1893351   | rs189857927 | rs190379045 | rs1908814   | rs191449639 | rs1919621   | rs1924399   | rs192841644 |
| rs189335278 | rs189861387 | rs1903844   | rs190889494 | rs191451841 | rs1919703   | rs192446476 | rs1928496   |
| rs1893380   | rs1898671   | rs1903845   | rs190927291 | rs191466475 | rs191982371 | rs192463896 | rs192849769 |
| rs189339    | rs1898711   | rs190431955 | rs190930099 | rs1914711   | rs1919865   | rs1924696   | rs1928529   |
| rs189349094 | rs1898841   | rs190432524 | rs1909350   | rs191494905 | rs1920116   | rs192489212 | rs192879075 |
| rs1893592   | rs189889864 | rs190434396 | rs190940054 | rs191497052 | rs1920130   | rs1924917   | rs192899375 |
| rs1893907   | rs1898931   | rs1904398   | rs1909436   | rs1915146   | rs192020759 | rs1924929   | rs192906039 |
| rs189392453 | rs189918701 | rs1904522   | rs190945295 | rs191516412 | rs192021326 | rs1924930   | rs192913879 |
| rs1893958   | rs1899227   | rs190452743 | rs190948096 | rs191518756 | rs192022    | rs1925113   | rs192917960 |
| rs1893989   | rs189937867 | rs1904823   | rs190948281 | rs191540449 | rs1920296   | rs1925148   | rs192923361 |
| rs1893993   | rs189943417 | rs1905014   | rs1909527   | rs191555775 | rs192042440 | rs192514996 | rs192929104 |
| rs189402769 | rs1899492   | rs1905041   | rs1909590   | rs1915724   | rs1920606   | rs192522312 | rs1929447   |
| rs1894071   | rs1899543   | rs190506411 | rs190970900 | rs191572726 | rs1920610   | rs1925282   | rs192944990 |
| rs1894100   | rs1899546   | rs1905186   | rs190982    | rs191578827 | rs1920650   | rs192534763 | rs192955957 |
| rs1894116   | rs1899689   | rs190528931 | rs1909960   | rs191591035 | rs192079295 | rs1925408   | rs192963808 |
| rs189421534 | rs1899692   | rs190536880 | rs1910005   | rs1915930   | rs192096194 | rs192543598 | rs192975004 |
| rs1894292   | rs189972056 | rs190537336 | rs191010498 | rs191597583 | rs192098482 | rs1925576   | rs1929848   |
| rs1894299   | rs189973909 | rs1905376   | rs191018606 | rs191605295 | rs1921087   | rs192560487 | rs1929863   |
| rs189434316 | rs189988997 | rs190542992 | rs191021045 | rs1916257   | rs192111487 | rs1925690   | rs1929883   |
| rs1894400   | rs1899896   | rs190543502 | rs191022259 | rs191631370 | rs192115356 | rs1925950   | rs192989810 |
| rs1894401   | rs189992044 | rs1905505   | rs1910236   | rs1916333   | rs192123848 | rs1925953   | rs1929922   |
| rs1894474   | rs1899951   | rs190557485 | rs191024636 | rs1916334   | rs192134906 | rs1926026   | rs1929933   |
| rs189448695 | rs1900004   | rs1905616   | rs191060451 | rs191633940 | rs192139693 | rs1926030   | rs1930169   |
| rs1894544   | rs1900005   | rs190581995 | rs191064657 | rs191643352 | rs1921445   | rs1926032   | rs1930244   |
| rs1894633   | rs1900016   | rs190595610 | rs191065629 | rs191655746 | rs1921622   | rs192613545 | rs1930290   |
| rs189468016 | rs190052446 | rs1905976   | rs1910738   | rs191674933 | rs1921673   | rs192622883 | rs193029098 |
| rs1894709   | rs190058083 | rs190609436 | rs191146367 | rs1916799   | rs192170963 | rs1926320   | rs1930326   |
| rs189478926 | rs190065944 | rs1906136   | rs191147097 | rs1916801   | rs192186653 | rs192642798 | rs1930371   |
| rs189479531 | rs1900719   | rs190613886 | rs191148279 | rs191692776 | rs1921910   | rs1926446   | rs1930380   |
| rs189480455 | rs190073    | rs1906223   | rs1911740   | rs1916977   | rs1921911   | rs1926447   | rs193042029 |
| rs1895062   | rs1900761   | rs1906252   | rs1911746   | rs191699156 | rs192191487 | rs192655202 | rs1930781   |
| rs189511080 | rs1900769   | rs1906412   | rs191175118 | rs1917008   | rs1922003   | rs192659474 | rs1930785   |
| rs1895270   | rs1900920   | rs1906436   | rs191177147 | rs191705561 | rs1922005   | rs192668    | rs193084249 |
| rs1895407   | rs1901013   | rs1906457   | rs1911908   | rs1917058   | rs1922018   | rs192672328 | rs1930941   |
| rs1895408   | rs190102446 | rs1906458   | rs191209518 | rs191719058 | rs192210727 | rs1926736   | rs1930955   |
| rs1895471   | rs190103771 | rs1906599   | rs191212334 | rs191729664 | rs192224341 | rs1926739   | rs1930991   |
| rs189555401 | rs190104    | rs190666382 | rs1912286   | rs1917368   | rs1922291   | rs1926872   | rs193099203 |
| rs1895582   | rs1901167   | rs1906672   | rs191239160 | rs191739273 | rs192230665 | rs192707516 | rs193101985 |
| rs1895585   | rs190118115 | rs190671241 | rs1912403   | rs191751273 | rs1922332   | rs192716    | rs193104780 |
| rs1895595   | rs190121281 | rs190688847 | rs1912409   | rs1917534   | rs192239286 | rs192716315 | rs193107685 |
| rs189583    | rs1901259   | rs1906953   | rs191245241 | rs191755093 | rs192260456 | rs1927355   | rs193112415 |
| rs189585165 | rs1901282   | rs1907067   | rs1912461   | rs1917780   | rs192264    | rs192735598 | rs193114076 |
| rs189593992 | rs190139255 | rs190712692 | rs191252491 | rs191780    | rs192268857 | rs1927358   | rs1931247   |
| rs1895941   | rs190144    | rs1907220   | rs1912528   | rs191780890 | rs192277252 | rs192754985 | rs1931255   |
| rs1895994   | rs1901440   | rs1907240   | rs1912580   | rs191784289 | rs192282539 | rs192755027 | rs1931259   |
| rs189600472 | rs1901442   | rs190726239 | rs191268001 | rs191785584 | rs1922879   | rs1927625   | rs1931263   |
| rs189601688 | rs1901477   | rs1907310   | rs191269336 | rs191814839 | rs1923031   | rs1927729   | rs193131030 |
| rs189602139 | rs190148485 | rs190733142 | rs191270678 | rs1918202   | rs1923032   | rs192775394 | rs1931386   |
| rs1896295   | rs190159566 | rs1907343   | rs191275341 | rs1918394   | rs192312544 | rs1927790   | rs1931391   |
| rs1896297   | rs190160997 | rs1907350   | rs191280542 | rs191843781 | rs1923216   | rs1927820   | rs1931408   |
| rs1896312   | rs190175998 | rs1907352   | rs1912826   | rs191865    | rs1923243   | rs1927855   | rs193141147 |
| rs1896313   | rs190194639 | rs1907462   | rs191291494 | rs1918690   | rs192324744 | rs192785674 | rs1931431   |
| rs189637610 | rs190197089 | rs190748049 | rs191305096 | rs191884522 | rs1923367   | rs1927860   | rs193149448 |
| rs1896539   | rs1902066   | rs1907604   | rs191306205 | rs1918865   | rs192339095 | rs1927898   | rs1931656   |
| rs1896797   | rs1902070   | rs1907631   | rs1913191   | rs191896574 | rs1923409   | rs1927901   | rs1931814   |
| rs1896995   | rs1902177   | rs1907702   | rs1913329   | rs1918973   | rs1923539   | rs1927902   | rs1932133   |
| rs189715677 | rs190245578 | rs1907703   | rs191336361 | rs1918978   | rs1923587   | rs1928082   | rs193220    |
| rs189724396 | rs1902661   | rs190775685 | rs1913517   | rs191903670 | rs192361383 | rs192812    | rs193236081 |
| rs189740529 | rs1902800   | rs190775951 | rs1913657   | rs1919128   | rs192364644 | rs1928168   | rs193239997 |
| rs1897468   | rs1902801   | rs190783615 | rs1913707   | rs1919159   | rs1923767   | rs1928175   | rs193243426 |
| rs1897495   | rs1902859   | rs1907989   | rs191379475 | rs191916038 | rs1923770   | rs192818565 | rs193267147 |
| rs189767158 | rs190298731 | rs190807041 | rs191380121 | rs191927852 | rs192383543 | rs1928191   | rs193280350 |

|             |           |           |           |           |           |           |           |
|-------------|-----------|-----------|-----------|-----------|-----------|-----------|-----------|
| rs193281485 | rs1938492 | rs1947988 | rs1958078 | rs1966323 | rs1973765 | rs1980251 | rs1985601 |
| rs193292177 | rs1938526 | rs194809  | rs195810  | rs1966479 | rs1973776 | rs1980413 | rs1985671 |
| rs193292207 | rs1938566 | rs194827  | rs1958113 | rs1966662 | rs197379  | rs1980422 | rs1985732 |
| rs1932945   | rs1938598 | rs194834  | rs1958560 | rs1966690 | rs1973791 | rs1980493 | rs1985927 |
| rs1932952   | rs1938679 | rs1948759 | rs1958801 | rs1966836 | rs1974004 | rs1980532 | rs1985951 |
| rs1933064   | rs1938790 | rs1948760 | rs195932  | rs1966865 | rs1974062 | rs1980655 | rs1986009 |
| rs1933199   | rs1939012 | rs1948783 | rs1959351 | rs1967017 | rs197412  | rs1980663 | rs1986116 |
| rs1933264   | rs1939252 | rs1948915 | rs1959356 | rs1967109 | rs197422  | rs1980781 | rs1986252 |
| rs1933270   | rs1939769 | rs1948948 | rs1959440 | rs1967115 | rs1974435 | rs1980854 | rs1986405 |
| rs1933295   | rs1939800 | rs1949072 | rs1960493 | rs1967256 | rs1974459 | rs1980992 | rs198645  |
| rs1933437   | rs1940377 | rs1949076 | rs196052  | rs1967279 | rs1974619 | rs1981224 | rs1986599 |
| rs1933440   | rs1940597 | rs1949226 | rs1960603 | rs1967309 | rs1974620 | rs1981331 | rs198663  |
| rs1933488   | rs1940709 | rs1949481 | rs196064  | rs1967334 | rs197482  | rs1981405 | rs198665  |
| rs1933683   | rs1940728 | rs1949542 | rs1960918 | rs1967604 | rs1975190 | rs1981525 | rs1986656 |
| rs1933717   | rs1940751 | rs1949633 | rs1961102 | rs1967639 | rs1975197 | rs1981627 | rs1986734 |
| rs1933720   | rs1941    | rs1949651 | rs1961162 | rs1967721 | rs1975474 | rs1981660 | rs1986868 |
| rs1933721   | rs1941355 | rs1949804 | rs1961220 | rs1967772 | rs1975487 | rs1981680 | rs1986971 |
| rs1933736   | rs1941367 | rs1950039 | rs1961266 | rs1967840 | rs1975514 | rs1981919 | rs1986972 |
| rs1933801   | rs1941685 | rs1950357 | rs1961456 | rs1968014 | rs1975802 | rs1981997 | rs1987070 |
| rs1933802   | rs1941687 | rs1950500 | rs1961468 | rs196807  | rs1975822 | rs1982072 | rs198716  |
| rs1934036   | rs1941697 | rs1950781 | rs1961579 | rs1968109 | rs1976403 | rs1982094 | rs1987471 |
| rs1934057   | rs1941706 | rs1950829 | rs1961639 | rs196814  | rs1976423 | rs1982151 | rs1987596 |
| rs1934074   | rs1941749 | rs1950835 | rs1961839 | rs1968204 | rs1976451 | rs1982173 | rs1987628 |
| rs1934100   | rs1941954 | rs1950897 | rs1961952 | rs1968252 | rs1976671 | rs1982277 | rs1987960 |
| rs1934102   | rs1941955 | rs1951121 | rs1962047 | rs1968294 | rs1976704 | rs1982350 | rs1987989 |
| rs1934179   | rs1941961 | rs1951167 | rs1962104 | rs1968470 | rs1976714 | rs1982353 | rs198800  |
| rs1934268   | rs1942    | rs1951202 | rs1962127 | rs1968514 | rs1976748 | rs1982386 | rs198801  |
| rs1934363   | rs1942094 | rs1951389 | rs1962310 | rs1968956 | rs197678  | rs1982441 | rs198805  |
| rs1934915   | rs1942262 | rs1951455 | rs1962390 | rs1969026 | rs1976859 | rs1982564 | rs198806  |
| rs1934955   | rs1942462 | rs1951459 | rs1962392 | rs1969091 | rs1977080 | rs198262  | rs198811  |
| rs1934963   | rs1942863 | rs1951627 | rs1962508 | rs1969097 | rs1977081 | rs1982774 | rs198812  |
| rs1935      | rs1942880 | rs1951716 | rs1962545 | rs1969213 | rs1977199 | rs1982796 | rs198813  |
| rs1935157   | rs1943199 | rs1951722 | rs1962666 | rs1969355 | rs1977200 | rs1982963 | rs198825  |
| rs1935354   | rs1943226 | rs1951742 | rs1962709 | rs196941  | rs197722  | rs1983170 | rs198833  |
| rs193538    | rs194369  | rs1952183 | rs1962883 | rs1969539 | rs1977289 | rs1983189 | rs198839  |
| rs193549    | rs1943973 | rs1952652 | rs1962929 | rs1969668 | rs1977512 | rs1983546 | rs198846  |
| rs1935571   | rs1944068 | rs1953012 | rs1963304 | rs196973  | rs1977658 | rs1983554 | rs198847  |
| rs1935581   | rs1944129 | rs1953126 | rs1963381 | rs1969796 | rs197770  | rs198358  | rs198851  |
| rs1935891   | rs1944386 | rs1953354 | rs1963456 | rs1969949 | rs1977821 | rs1983610 | rs1988552 |
| rs1935949   | rs1944688 | rs1953522 | rs1963497 | rs1970365 | rs1977900 | rs1983614 | rs198856  |
| rs1936211   | rs1944689 | rs1953535 | rs1963676 | rs1970546 | rs1978060 | rs1983753 | rs1989147 |
| rs1936246   | rs1944708 | rs1954494 | rs1963689 | rs1970606 | rs1978082 | rs198379  | rs1989223 |
| rs193628    | rs1945139 | rs1954735 | rs196376  | rs1970811 | rs1978102 | rs198384  | rs1989803 |
| rs1936361   | rs1945166 | rs1954761 | rs1963869 | rs197084  | rs1978117 | rs1983853 | rs1990101 |
| rs1936637   | rs1945213 | rs1955163 | rs1964272 | rs1971136 | rs1978304 | rs1983864 | rs1990573 |
| rs1936792   | rs1945391 | rs1955250 | rs1964356 | rs1971218 | rs1978374 | rs198389  | rs1990622 |
| rs1936797   | rs1945392 | rs195542  | rs1964390 | rs1971256 | rs1978427 | rs1983890 | rs1990634 |
| rs1936799   | rs1945393 | rs1955512 | rs1964516 | rs1971378 | rs1978459 | rs1983891 | rs1990657 |
| rs1936800   | rs1945397 | rs1955540 | rs1964678 | rs1971655 | rs1978573 | rs1983949 | rs1990760 |
| rs1936805   | rs194608  | rs1955614 | rs1964699 | rs1971762 | rs1978730 | rs1984076 | rs1990774 |
| rs1936806   | rs1946225 | rs1956002 | rs196477  | rs1972041 | rs1978968 | rs1984119 | rs1990950 |
| rs1936807   | rs1946265 | rs1956152 | rs1964859 | rs1972044 | rs1979033 | rs198426  | rs1990975 |
| rs1936811   | rs1946473 | rs1956218 | rs1964926 | rs1972100 | rs197907  | rs1984389 | rs1991042 |
| rs193686    | rs1946612 | rs1956334 | rs1964927 | rs1972176 | rs197922  | rs198442  | rs1991083 |
| rs1937171   | rs194679  | rs1956373 | rs1964995 | rs1972460 | rs1979527 | rs198443  | rs1991110 |
| rs193735    | rs1947075 | rs1956419 | rs1965024 | rs197261  | rs1979541 | rs1984481 | rs1991228 |
| rs1937436   | rs194714  | rs1956456 | rs1965029 | rs1972627 | rs1979654 | rs198457  | rs1991370 |
| rs1937443   | rs1947198 | rs1956529 | rs1965049 | rs1972809 | rs1979679 | rs1984571 | rs1991371 |
| rs1937447   | rs1947213 | rs1956589 | rs1965132 | rs1972860 | rs1979835 | rs1984658 | rs1991401 |
| rs1937450   | rs1947228 | rs1957021 | rs1965139 | rs1972863 | rs1979837 | rs1984775 | rs1991431 |
| rs1937455   | rs194730  | rs1957078 | rs1965148 | rs1972994 | rs1980056 | rs1984870 | rs1991492 |
| rs1937529   | rs194740  | rs1957111 | rs1965629 | rs1973019 | rs1980057 | rs1985157 | rs1991545 |
| rs193778    | rs194741  | rs195720  | rs1965800 | rs1973095 | rs1980080 | rs1985162 | rs1991556 |
| rs1937883   | rs194742  | rs1957429 | rs1966136 | rs1973284 | rs1980099 | rs1985205 | rs1991585 |
| rs1937999   | rs1947457 | rs1957819 | rs1966203 | rs1973325 | rs1980119 | rs198535  | rs1991601 |
| rs1938376   | rs194749  | rs1957830 | rs1966248 | rs1973612 | rs1980129 | rs1985378 | rs1991651 |
| rs1938434   | rs1947798 | rs1957894 | rs1966265 | rs197374  | rs1980235 | rs1985511 | rs1991797 |



|             |             |             |             |             |             |             |             |
|-------------|-------------|-------------|-------------|-------------|-------------|-------------|-------------|
| rs1991866   | rs199607859 | rs1998358   | rs2001209   | rs200368423 | rs200572016 | rs200777151 | rs200975846 |
| rs1991867   | rs1996120   | rs199839547 | rs200123836 | rs200373    | rs200576292 | rs200779045 | rs200980971 |
| rs1991976   | rs199619373 | rs1998418   | rs200124419 | rs200383755 | rs2005827   | rs200779223 | rs200982668 |
| rs1992011   | rs1996277   | rs1998422   | rs200127094 | rs200392270 | rs2005950   | rs200787930 | rs200984644 |
| rs1992381   | rs1996371   | rs199844134 | rs200130057 | rs200392536 | rs200595745 | rs200793698 | rs200986    |
| rs1992382   | rs1996422   | rs1998459   | rs2001337   | rs200400638 | rs2005974   | rs2007960   | rs200988    |
| rs1992383   | rs199646819 | rs199849618 | rs200138078 | rs2004038   | rs200603803 | rs200800380 | rs200990    |
| rs1992661   | rs1996617   | rs1998547   | rs2001461   | rs200411784 | rs200608253 | rs200801362 | rs200990725 |
| rs1992721   | rs199663871 | rs199858224 | rs2001480   | rs2004187   | rs2006092   | rs2008018   | rs200991    |
| rs199281    | rs199666144 | rs1998598   | rs2001523   | rs200426909 | rs2006094   | rs2008027   | rs200992198 |
| rs1993373   | rs199669276 | rs199861415 | rs200154182 | rs2004318   | rs2006112   | rs2008258   | rs200994    |
| rs1993408   | rs199670311 | rs1998697   | rs200154334 | rs200433550 | rs200611641 | rs200830364 | rs200995285 |
| rs199347    | rs1996719   | rs1998710   | rs2001546   | rs200434675 | rs2006122   | rs200830867 | rs200995462 |
| rs1993484   | rs199673881 | rs199880074 | rs200162716 | rs2004359   | rs2006141   | rs200837337 | rs200997557 |
| rs199351    | rs199681604 | rs1998811   | rs2001628   | rs200436316 | rs200622087 | rs2008387   | rs200998194 |
| rs1993709   | rs1996866   | rs199883506 | rs2001707   | rs200437269 | rs2006227   | rs200840970 | rs200998494 |
| rs1993838   | rs1996880   | rs199883643 | rs2001732   | rs200447114 | rs2006281   | rs200841050 | rs200999181 |
| rs1993875   | rs199691861 | rs1998848   | rs200173452 | rs200448    | rs200632716 | rs2008411   | rs201003839 |
| rs1993876   | rs1996928   | rs199897763 | rs200174418 | rs200454003 | rs200634877 | rs200848    | rs2010054   |
| rs1993878   | rs199694726 | rs199897813 | rs200181073 | rs200457388 | rs200637013 | rs200851194 | rs2010099   |
| rs1994016   | rs199695765 | rs1999066   | rs2001846   | rs200457494 | rs200638392 | rs2008514   | rs201011002 |
| rs1994089   | rs199696982 | rs199910997 | rs2001945   | rs200461307 | rs200639793 | rs2008560   | rs201013030 |
| rs1994090   | rs199699082 | rs1999124   | rs200201338 | rs2004640   | rs200641845 | rs200856670 | rs201014064 |
| rs1994125   | rs1996992   | rs199913382 | rs2002094   | rs2004649   | rs200644307 | rs200857348 | rs201015026 |
| rs1994135   | rs1997111   | rs199921354 | rs200210041 | rs200469773 | rs200647710 | rs2008603   | rs201018682 |
| rs1994147   | rs199717050 | rs199928    | rs200210321 | rs200476    | rs200648189 | rs2008675   | rs201019882 |
| rs199441    | rs1997243   | rs199930025 | rs200216644 | rs200476039 | rs200651966 | rs200868824 | rs201022770 |
| rs199443    | rs199727692 | rs1999323   | rs200226143 | rs2004776   | rs200662204 | rs200870675 | rs201026476 |
| rs199447    | rs199727998 | rs199933    | rs200229291 | rs200480363 | rs2006771   | rs200873572 | rs201028157 |
| rs199453    | rs1997280   | rs199938283 | rs200235318 | rs200482500 | rs200678690 | rs200879388 | rs2010352   |
| rs199456    | rs1997404   | rs199950405 | rs200240998 | rs200484    | rs2006788   | rs200880    | rs201035844 |
| rs199470    | rs199741557 | rs1999512   | rs200243292 | rs2004851   | rs2006810   | rs200883214 | rs2010390   |
| rs1994712   | rs199745043 | rs1999537   | rs200243293 | rs200489612 | rs200682696 | rs2008845   | rs201043192 |
| rs1994721   | rs199746610 | rs199955185 | rs200247723 | rs200491113 | rs200683443 | rs200885092 | rs201045437 |
| rs1994840   | rs199749272 | rs199957050 | rs200249085 | rs200491743 | rs200688233 | rs200888398 | rs2010476   |
| rs1994887   | rs199749638 | rs199957421 | rs200252353 | rs2004925   | rs200688856 | rs2008891   | rs201048567 |
| rs199491    | rs1997502   | rs1999594   | rs200253706 | rs2004930   | rs200688949 | rs200895399 | rs201048650 |
| rs1994969   | rs1997529   | rs1999613   | rs200255906 | rs200495339 | rs2006950   | rs200895692 | rs2010491   |
| rs199497    | rs1997571   | rs199964216 | rs200256983 | rs2004962   | rs200699082 | rs200911786 | rs201052613 |
| rs199498    | rs1997572   | rs199975542 | rs2002574   | rs2005078   | rs2006996   | rs2009130   | rs201058905 |
| rs199500    | rs1997577   | rs199978639 | rs200260400 | rs200508662 | rs2007022   | rs200913165 | rs2010672   |
| rs199505    | rs1997595   | rs1999805   | rs2002664   | rs200510190 | rs2007044   | rs200917013 | rs201072423 |
| rs199508432 | rs199768142 | rs199987224 | rs200267038 | rs2005108   | rs2007084   | rs200918659 | rs201074739 |
| rs199512    | rs199771582 | rs1999874   | rs200267040 | rs200513066 | rs200712209 | rs200921911 | rs201078918 |
| rs199515    | rs1997719   | rs1999930   | rs2002675   | rs200516372 | rs2007154   | rs2009262   | rs201085401 |
| rs1995181   | rs1997797   | rs199995491 | rs200279    | rs2005172   | rs200721207 | rs200930495 | rs2010921   |
| rs199522    | rs199779881 | rs200000734 | rs200279226 | rs200519383 | rs200722509 | rs2009310   | rs2011009   |
| rs1995245   | rs1997814   | rs200006483 | rs200291097 | rs2005199   | rs200724327 | rs200932296 | rs201104642 |
| rs199525    | rs1997833   | rs200014787 | rs200292835 | rs200520095 | rs200725404 | rs200933617 | rs201105853 |
| rs199527736 | rs199787521 | rs2000228   | rs200293726 | rs200520431 | rs200726463 | rs2009382   | rs2011077   |
| rs199528    | rs199791    | rs200025476 | rs200296776 | rs2005277   | rs2007272   | rs2009416   | rs2011082   |
| rs199528644 | rs199795230 | rs200034829 | rs200298074 | rs200528    | rs2007403   | rs200943612 | rs2011092   |
| rs199529    | rs199795985 | rs200037216 | rs200299716 | rs200528994 | rs200742198 | rs200949    | rs201111036 |
| rs199530775 | rs199796575 | rs200039274 | rs2003241   | rs200534    | rs200744777 | rs200950799 | rs201112509 |
| rs199533    | rs1997995   | rs2000538   | rs2003253   | rs2005396   | rs200746495 | rs200954687 | rs201113322 |
| rs199545687 | rs199799668 | rs2000614   | rs200329634 | rs200540247 | rs2007471   | rs200956582 | rs201117888 |
| rs199560986 | rs199800298 | rs2000813   | rs2003313   | rs200541    | rs2007481   | rs2009581   | rs201123820 |
| rs199562446 | rs1998013   | rs200087953 | rs200337503 | rs200541723 | rs2007483   | rs2009598   | rs201128688 |
| rs199564443 | rs1998076   | rs200088103 | rs200342067 | rs2005455   | rs200748895 | rs200959874 | rs201129973 |
| rs199565725 | rs199808714 | rs200092657 | rs2003476   | rs200548390 | rs200749956 | rs2009624   | rs201131773 |
| rs1995812   | rs1998122   | rs200096953 | rs2003485   | rs200549504 | rs200751500 | rs200964    | rs201133964 |
| rs199585654 | rs199816133 | rs2000999   | rs2003490   | rs200550939 | rs200752500 | rs200964278 | rs201140091 |
| rs199588110 | rs1998174   | rs200104800 | rs200349593 | rs200560025 | rs200760632 | rs200965    | rs2011425   |
| rs199592697 | rs199823    | rs200105536 | rs200351414 | rs200560216 | rs2007632   | rs200966    | rs201143466 |
| rs1996023   | rs199825459 | rs200110162 | rs200357845 | rs200560717 | rs2007655   | rs2009733   | rs201148465 |
| rs199602655 | rs1998266   | rs2001129   | rs2003585   | rs2005638   | rs200773990 | rs200974175 | rs2011528   |
| rs199605734 | rs199834894 | rs200119412 | rs200367988 | rs2005682   | rs200775911 | rs2009746   | rs2011567   |

|             |             |             |             |             |           |           |           |
|-------------|-------------|-------------|-------------|-------------|-----------|-----------|-----------|
| rs201158093 | rs201333164 | rs201541427 | rs2017759   | rs202056061 | rs2023335 | rs2029466 | rs2034650 |
| rs201158957 | rs201335410 | rs2015580   | rs2017760   | rs202057889 | rs2023346 | rs2029582 | rs2034669 |
| rs2011603   | rs2013515   | rs2015599   | rs2017765   | rs202059056 | rs2023463 | rs2029605 | rs203470  |
| rs2011614   | rs2013603   | rs201561    | rs201777573 | rs202062355 | rs2023472 | rs202970  | rs2034768 |
| rs201165754 | rs2013671   | rs201561609 | rs201778907 | rs202063506 | rs2023634 | rs2029865 | rs203481  |
| rs201166461 | rs2013674   | rs201562238 | rs2017811   | rs202070282 | rs2023703 | rs2029899 | rs2034963 |
| rs2011689   | rs2013701   | rs201563    | rs2017858   | rs202071545 | rs2023792 | rs2029999 | rs20354   |
| rs201170069 | rs2013717   | rs201563658 | rs2017905   | rs202075571 | rs2023843 | rs2030030 | rs2035403 |
| rs2011767   | rs2013724   | rs2015637   | rs201794747 | rs202087577 | rs2023844 | rs2030114 | rs2035562 |
| rs201178535 | rs201375651 | rs2015708   | rs201794926 | rs2020921   | rs2024050 | rs2030121 | rs2035647 |
| rs201184533 | rs201381116 | rs201571    | rs201796    | rs2020942   | rs2024070 | rs2030237 | rs2035806 |
| rs201184664 | rs2013837   | rs201589481 | rs201796065 | rs202099525 | rs2024092 | rs2030291 | rs2035816 |
| rs201192867 | rs201384443 | rs201593    | rs201798    | rs202099642 | rs2024115 | rs2030323 | rs2035835 |
| rs201193    | rs201385366 | rs2015971   | rs201801    | rs202100735 | rs2024211 | rs2030401 | rs2035837 |
| rs201194591 | rs201386833 | rs201597274 | rs201811265 | rs202102042 | rs2024219 | rs2030500 | rs2035838 |
| rs201196042 | rs201390621 | rs201601317 | rs201814405 | rs2021092   | rs2024348 | rs2030519 | rs2035935 |
| rs2011962   | rs201393666 | rs2016034   | rs2018199   | rs202110867 | rs2024385 | rs2030520 | rs2035936 |
| rs201198    | rs201394051 | rs201604542 | rs201831100 | rs202110996 | rs2024449 | rs2030672 | rs2036226 |
| rs2012011   | rs201397736 | rs201605619 | rs201837958 | rs202126107 | rs2024568 | rs2030705 | rs2036321 |
| rs201202118 | rs201399927 | rs201611143 | rs201838815 | rs202126283 | rs2024586 | rs2030746 | rs2036465 |
| rs201204531 | rs2014004   | rs201613983 | rs2018420   | rs202127176 | rs2024595 | rs2030839 | rs2036527 |
| rs201205018 | rs201402819 | rs2016151   | rs201847125 | rs202128511 | rs2024618 | rs2030971 | rs2036534 |
| rs201205097 | rs201408539 | rs2016266   | rs2018490   | rs202135714 | rs2024825 | rs2031316 | rs2036914 |
| rs2012071   | rs201412517 | rs201628016 | rs2018519   | rs202136005 | rs2025096 | rs2031496 | rs2036916 |
| rs201210393 | rs201416723 | rs201629990 | rs201851995 | rs202138115 | rs2025151 | rs2031522 | rs203709  |
| rs201215552 | rs2014265   | rs201631095 | rs201852005 | rs202139281 | rs2025424 | rs2031595 | rs203710  |
| rs201216548 | rs2014300   | rs201634149 | rs201865685 | rs2021407   | rs2025758 | rs203183  | rs2037511 |
| rs201220420 | rs2014355   | rs2016358   | rs2018659   | rs202144190 | rs2026037 | rs2031847 | rs2037955 |
| rs201220830 | rs2014408   | rs2016366   | rs201874364 | rs2021511   | rs2026174 | rs2031998 | rs2037977 |
| rs201226733 | rs2014441   | rs2016394   | rs201874554 | rs202157    | rs2026194 | rs2032217 | rs2037978 |
| rs201226914 | rs2014444   | rs2016409   | rs201875709 | rs202157095 | rs2026263 | rs2032231 | rs2037979 |
| rs201233223 | rs201445483 | rs201643157 | rs201878571 | rs202159835 | rs202637  | rs2032314 | rs2038158 |
| rs2012444   | rs2014490   | rs2016444   | rs2018860   | rs2021638   | rs2026428 | rs2032447 | rs2038210 |
| rs2012453   | rs201450565 | rs2016469   | rs2018916   | rs202170712 | rs202645  | rs2032451 | rs2038255 |
| rs2012502   | rs2014511   | rs201647884 | rs201894973 | rs2021708   | rs2026679 | rs2032463 | rs2038479 |
| rs201253367 | rs201452941 | rs201648240 | rs201897810 | rs2021722   | rs2026749 | rs2032528 | rs2038480 |
| rs201257518 | rs201458284 | rs201650162 | rs2018980   | rs2021783   | rs202676  | rs2032624 | rs203869  |
| rs201259422 | rs2014590   | rs201655553 | rs2019065   | rs202180552 | rs2026805 | rs2032631 | rs2038695 |
| rs201259497 | rs201459901 | rs2016572   | rs2019090   | rs202183059 | rs2026937 | rs2032658 | rs2038700 |
| rs2012627   | rs2014604   | rs2016575   | rs201910565 | rs202184555 | rs2027061 | rs203273  | rs2038726 |
| rs201263987 | rs201466262 | rs201661014 | rs2019137   | rs2021885   | rs2027442 | rs2032887 | rs2038823 |
| rs201267172 | rs201468966 | rs201666051 | rs2019185   | rs202190491 | rs2027515 | rs2032890 | rs2039004 |
| rs201269048 | rs201470250 | rs201667812 | rs201922257 | rs2022003   | rs2027518 | rs2032905 | rs2039100 |
| rs2012709   | rs2014712   | rs201669710 | rs201935337 | rs202200760 | rs2027605 | rs2032912 | rs2039204 |
| rs2012714   | rs201473667 | rs2016698   | rs201936061 | rs202203062 | rs2027761 | rs2032915 | rs2039424 |
| rs201272561 | rs201475383 | rs201673768 | rs201938902 | rs2022051   | rs2027798 | rs2033054 | rs2040406 |
| rs2012736   | rs201479143 | rs201687269 | rs201941874 | rs2022065   | rs2027939 | rs2033149 | rs2040445 |
| rs201274146 | rs201481721 | rs201697372 | rs2019472   | rs2022130   | rs2027982 | rs2033159 | rs2040494 |
| rs2012809   | rs2014830   | rs2017058   | rs201950044 | rs202217993 | rs2027993 | rs2033195 | rs2040498 |
| rs201285129 | rs2014850   | rs201710157 | rs2019562   | rs202220108 | rs2027995 | rs2033351 | rs2040571 |
| rs2012888   | rs2014896   | rs201718356 | rs201970744 | rs202224378 | rs2028122 | rs2033529 | rs2040666 |
| rs201289551 | rs2014912   | rs201719697 | rs2019790   | rs2022272   | rs2028150 | rs2033531 | rs204068  |
| rs201295667 | rs201495    | rs201737825 | rs201981153 | rs202227463 | rs2028151 | rs2033562 | rs204070  |
| rs201297151 | rs201497780 | rs201738837 | rs201993980 | rs2022309   | rs2028155 | rs2033732 | rs2040704 |
| rs2013002   | rs2014998   | rs201740279 | rs2019960   | rs2022330   | rs2028269 | rs2033784 | rs204073  |
| rs2013105   | rs201501563 | rs2017404   | rs202001822 | rs202233001 | rs2028299 | rs2033887 | rs2040732 |
| rs201314303 | rs2015086   | rs201742937 | rs202007714 | rs202234992 | rs2028383 | rs2033939 | rs2040771 |
| rs2013158   | rs201514157 | rs2017445   | rs202011557 | rs202237966 | rs2028386 | rs2033988 | rs2040786 |
| rs201316070 | rs201517563 | rs2017500   | rs202020787 | rs202240051 | rs2028550 | rs203425  | rs2040792 |
| rs201319146 | rs2015210   | rs201753350 | rs202021413 | rs202243137 | rs2028900 | rs2034310 | rs2040862 |
| rs2013208   | rs2015244   | rs201753992 | rs2020222   | rs202244335 | rs202904  | rs203450  | rs2040879 |
| rs2013231   | rs201528345 | rs201759487 | rs202032561 | rs2022464   | rs202906  | rs203452  | rs2040944 |
| rs201323148 | rs201530    | rs201760694 | rs202045005 | rs2022542   | rs202927  | rs203456  | rs2041027 |
| rs201323554 | rs2015333   | rs201761378 | rs202049448 | rs2022945   | rs2029362 | rs2034604 | rs2041073 |
| rs201324539 | rs2015352   | rs201764793 | rs202049562 | rs2022959   | rs2029401 | rs2034618 | rs2041144 |
| rs201326893 | rs201536174 | rs201766101 | rs202054440 | rs2023016   | rs202941  | rs203462  | rs2041475 |
| rs201327451 | rs201540352 | rs201773321 | rs202055764 | rs2023263   | rs2029458 | rs2034631 | rs2041570 |

|           |           |           |           |           |           |           |             |
|-----------|-----------|-----------|-----------|-----------|-----------|-----------|-------------|
| rs2041670 | rs2048061 | rs2053079 | rs2059352 | rs2065152 | rs2069568 | rs2071379 | rs207299    |
| rs2041733 | rs2048080 | rs2053316 | rs2059427 | rs2065206 | rs2069639 | rs2071382 | rs2073006   |
| rs2042011 | rs2048161 | rs2053457 | rs2059489 | rs206528  | rs206965  | rs2071390 | rs2073081   |
| rs2042012 | rs2048240 | rs2053500 | rs2059614 | rs2065418 | rs206966  | rs2071403 | rs2073236   |
| rs2042329 | rs2048523 | rs2053682 | rs2059752 | rs2065500 | rs2069757 | rs2071407 | rs2073267   |
| rs2042395 | rs2048524 | rs2053797 | rs2059780 | rs2065504 | rs2069763 | rs2071410 | rs2073307   |
| rs2042400 | rs2048651 | rs2054095 | rs2059807 | rs2065603 | rs2069772 | rs2071426 | rs2073323   |
| rs204247  | rs204881  | rs20541   | rs2059846 | rs2065633 | rs2069832 | rs2071444 | rs2073398   |
| rs2042477 | rs204883  | rs2054117 | rs2060199 | rs2065883 | rs2069833 | rs2071449 | rs2073498   |
| rs2042555 | rs2048830 | rs205434  | rs2060285 | rs2066107 | rs2069837 | rs2071454 | rs2073499   |
| rs2042608 | rs204888  | rs2054349 | rs2060296 | rs2066108 | rs2069884 | rs2071466 | rs2073526   |
| rs204295  | rs204893  | rs205438  | rs2060337 | rs2066152 | rs2069901 | rs2071473 | rs2073547   |
| rs2042995 | rs2048997 | rs2054434 | rs2060457 | rs2066361 | rs2069945 | rs2071479 | rs2073643   |
| rs2043007 | rs2049045 | rs2054468 | rs2060546 | rs2066362 | rs2070074 | rs2071518 | rs2073668   |
| rs2043027 | rs204907  | rs2054576 | rs2060597 | rs2066363 | rs2070107 | rs2071533 | rs2073721   |
| rs2043040 | rs204914  | rs2054903 | rs2060675 | rs2066496 | rs2070118 | rs2071536 | rs2073748   |
| rs2043082 | rs2049604 | rs2055101 | rs2060779 | rs2066590 | rs2070197 | rs2071538 | rs2073820   |
| rs2043085 | rs2049741 | rs2055145 | rs2060793 | rs2066596 | rs2070203 | rs2071543 | rs2073829   |
| rs2043187 | rs2049805 | rs2055375 | rs2061026 | rs2066702 | rs2070235 | rs2071550 | rs2073867   |
| rs2043280 | rs2049814 | rs2055576 | rs2061027 | rs2066710 | rs2070274 | rs2071590 | rs2073869   |
| rs2043443 | rs2049865 | rs2055710 | rs2061071 | rs2066714 | rs2070341 | rs2071591 | rs2073872   |
| rs2043539 | rs204990  | rs2055727 | rs2061343 | rs2066790 | rs2070389 | rs2071596 | rs2073963   |
| rs2043549 | rs204993  | rs2055901 | rs2061425 | rs2066807 | rs2070433 | rs2071646 | rs2074038   |
| rs2043581 | rs204995  | rs2055940 | rs2061456 | rs2066808 | rs2070464 | rs2071699 | rs2074120   |
| rs2043671 | rs204999  | rs2055975 | rs2061538 | rs2066819 | rs2070578 | rs2071732 | rs2074158   |
| rs2043675 | rs2049992 | rs2055981 | rs2061543 | rs2066827 | rs2070596 | rs2071754 | rs2074164   |
| rs2043970 | rs2050011 | rs2055997 | rs2061640 | rs2066844 | rs2070598 | rs2071769 | rs2074188   |
| rs2044062 | rs2050058 | rs2056475 | rs2061679 | rs2066845 | rs2070600 | rs2071802 | rs2074204   |
| rs2044148 | rs2050114 | rs2056477 | rs2061705 | rs2066847 | rs2070632 | rs2071887 | rs2074227   |
| rs2044387 | rs2050122 | rs2056492 | rs2061708 | rs2066861 | rs2070633 | rs2072081 | rs2074238   |
| rs2044469 | rs2050185 | rs2056625 | rs2061831 | rs2066864 | rs2070665 | rs2072113 | rs2074238-T |
| rs2044479 | rs2050188 | rs2056626 | rs2062010 | rs2066865 | rs2070667 | rs2072114 | rs2074302   |
| rs204469  | rs205024  | rs2056857 | rs2062078 | rs2066905 | rs2070669 | rs2072117 | rs2074310   |
| rs204474  | rs2050256 | rs2056860 | rs2062113 | rs2066938 | rs2070699 | rs2072130 | rs2074314   |
| rs2044753 | rs2050265 | rs2056923 | rs2062204 | rs2067004 | rs2070715 | rs2072134 | rs2074356   |
| rs204480  | rs2050392 | rs2057052 | rs2062225 | rs206705  | rs2070722 | rs2072153 | rs2074404   |
| rs2045147 | rs2050462 | rs2057053 | rs2062250 | rs2067079 | rs2070729 | rs2072183 | rs2074442   |
| rs2045180 | rs2050568 | rs2057069 | rs2062305 | rs206708  | rs2070745 | rs2072209 | rs2074453   |
| rs2045258 | rs2050663 | rs205711  | rs2062316 | rs2067082 | rs2070762 | rs2072327 | rs2074478   |
| rs2045323 | rs2050691 | rs2057149 | rs2062331 | rs2067087 | rs2070776 | rs2072412 | rs2074488   |
| rs2045457 | rs2050866 | rs2057178 | rs2062375 | rs2067615 | rs2070803 | rs2072413 | rs2074518   |
| rs2045517 | rs2051105 | rs2057222 | rs2062377 | rs2067663 | rs2070850 | rs2072438 | rs2074518-A |
| rs2045629 | rs2051211 | rs2057291 | rs2062432 | rs2067783 | rs2070856 | rs2072448 | rs2074551   |
| rs2045966 | rs2051293 | rs2057388 | rs2062479 | rs2067919 | rs2070895 | rs2072449 | rs2074585   |
| rs2046045 | rs2051407 | rs2057413 | rs2062528 | rs2068012 | rs2070901 | rs2072490 | rs2074611   |
| rs2046210 | rs2051484 | rs2057655 | rs2062541 | rs2068229 | rs2070902 | rs2072499 | rs2074613   |
| rs2046301 | rs2051549 | rs2057656 | rs2062591 | rs2068428 | rs2070904 | rs2072510 | rs2074636   |
| rs2046411 | rs2051559 | rs2057681 | rs2062708 | rs2068625 | rs2070929 | rs2072518 | rs2074639   |
| rs2046602 | rs2051773 | rs2057763 | rs2062882 | rs2068756 | rs2070959 | rs2072590 | rs2074683   |
| rs2046850 | rs2051809 | rs2057805 | rs2063177 | rs2068886 | rs2070971 | rs2072596 | rs2074686   |
| rs2047007 | rs2051935 | rs2057869 | rs2063643 | rs2068888 | rs2071044 | rs2072597 | rs2074733   |
| rs2047036 | rs2052015 | rs2057884 | rs2063724 | rs2069035 | rs2071047 | rs2072633 | rs2074735   |
| rs2047076 | rs2052188 | rs2058024 | rs2063730 | rs2069117 | rs2071058 | rs2072659 | rs2074755   |
| rs2047134 | rs2052263 | rs2058122 | rs2063976 | rs2069126 | rs2071167 | rs2072671 | rs2074881   |
| rs2047198 | rs2052284 | rs2058176 | rs2064009 | rs206913  | rs2071199 | rs2072696 | rs2074919   |
| rs2047202 | rs2052285 | rs2058382 | rs2064074 | rs206916  | rs2071206 | rs207270  | rs2074977   |
| rs2047229 | rs2052354 | rs2058527 | rs2064163 | rs2069213 | rs2071213 | rs2072713 | rs2075060   |
| rs2047293 | rs2052480 | rs2058575 | rs2064219 | rs2069235 | rs2071243 | rs2072727 | rs2075064   |
| rs2047408 | rs2052536 | rs2058622 | rs2064251 | rs206936  | rs2071277 | rs2072732 | rs2075066   |
| rs2047409 | rs205260  | rs2058625 | rs2064317 | rs2069408 | rs2071278 | rs2072735 | rs2075067   |
| rs2047429 | rs205262  | rs2058660 | rs2064431 | rs2069416 | rs2071286 | rs207277  | rs2075171   |
| rs2047568 | rs2052670 | rs2058742 | rs206447  | rs2069418 | rs2071288 | rs2072806 | rs2075230   |
| rs20478   | rs2052690 | rs2058787 | rs2064482 | rs2069426 | rs2071299 | rs2072860 | rs2075251   |
| rs2047803 | rs2052702 | rs2058804 | rs2064495 | rs2069442 | rs2071303 | rs2072895 | rs2075252   |
| rs2047866 | rs2052868 | rs2058898 | rs2064853 | rs2069443 | rs2071305 | rs2072899 | rs2075290   |
| rs2047898 | rs2052964 | rs2058914 | rs2064933 | rs2069456 | rs2071342 | rs2072910 | rs2075291   |
| rs2047937 | rs2053005 | rs2059308 | rs2065065 | rs2069556 | rs2071348 | rs2072945 | rs2075292   |

|           |           |           |           |           |           |           |           |
|-----------|-----------|-----------|-----------|-----------|-----------|-----------|-----------|
| rs2075302 | rs2078555 | rs2089979 | rs2100944 | rs2108268 | rs2115014 | rs212389  | rs2133037 |
| rs2075371 | rs2078825 | rs2089983 | rs2101289 | rs2108321 | rs211510  | rs212400  | rs2133086 |
| rs2075375 | rs2079227 | rs2090408 | rs210131  | rs2108622 | rs2115107 | rs212401  | rs2133189 |
| rs2075423 | rs2079742 | rs2090409 | rs210134  | rs2108635 | rs2115536 | rs212402  | rs2133204 |
| rs2075432 | rs2079795 | rs2091041 | rs210135  | rs2108706 | rs2115563 | rs2124034 | rs2133319 |
| rs2075466 | rs2079796 | rs2091084 | rs210138  | rs2108753 | rs2115630 | rs212405  | rs2133450 |
| rs2075633 | rs2079987 | rs209126  | rs210142  | rs2108864 | rs2115691 | rs212407  | rs2133480 |
| rs2075650 | rs2080090 | rs2091329 | rs210143  | rs2108967 | rs2115740 | rs212408  | rs2133593 |
| rs2075665 | rs208015  | rs2091378 | rs210148  | rs210899  | rs2115763 | rs212409  | rs2133896 |
| rs2075671 | rs2080208 | rs2091513 | rs210152  | rs2109045 | rs2115780 | rs212417  | rs2134025 |
| rs2075672 | rs2080227 | rs2091624 | rs2101521 | rs2109069 | rs2115885 | rs2124373 | rs2134046 |
| rs2075677 | rs2080303 | rs2091921 | rs210155  | rs210914  | rs2116093 | rs2124440 | rs2134063 |
| rs2075679 | rs2080346 | rs2092172 | rs210156  | rs210915  | rs2116290 | rs2124616 | rs2134223 |
| rs2075710 | rs2080401 | rs2092248 | rs210157  | rs210938  | rs2116308 | rs2124910 | rs2134417 |
| rs2075746 | rs2080454 | rs2092524 | rs210183  | rs210946  | rs211644  | rs2124969 | rs2134443 |
| rs2075799 | rs2080487 | rs2092733 | rs2101975 | rs210950  | rs2116709 | rs2125067 | rs2134479 |
| rs2075801 | rs2080512 | rs2093210 | rs2102027 | rs2109505 | rs2116830 | rs212517  | rs213462  |
| rs2075803 | rs208054  | rs2093623 | rs2102128 | rs2109514 | rs2116922 | rs212524  | rs2134814 |
| rs2075822 | rs208079  | rs2093657 | rs2102191 | rs210962  | rs2116941 | rs212526  | rs213483  |
| rs2075876 | rs2080870 | rs2093760 | rs2102278 | rs2109648 | rs2116942 | rs2125345 | rs213485  |
| rs2075915 | rs2080957 | rs2093816 | rs2102341 | rs210966  | rs2117009 | rs2125716 | rs2134858 |
| rs2075968 | rs2081048 | rs2093847 | rs2102418 | rs210977  | rs2117029 | rs2125799 | rs2134937 |
| rs2075995 | rs2081209 | rs2094247 | rs2102503 | rs2109984 | rs2117032 | rs2125948 | rs213494  |
| rs2075998 | rs2081493 | rs2094580 | rs2102506 | rs2110001 | rs2117137 | rs2126069 | rs2134964 |
| rs2076028 | rs2081545 | rs209474  | rs2102649 | rs2110070 | rs2117149 | rs2126076 | rs2135116 |
| rs2076085 | rs2081651 | rs2094889 | rs2102808 | rs2110073 | rs211718  | rs2126165 | rs2135232 |
| rs2076086 | rs2081652 | rs209489  | rs2102923 | rs2110281 | rs2117234 | rs2126259 | rs2135452 |
| rs2076168 | rs2081687 | rs2094920 | rs2102949 | rs2110690 | rs2117243 | rs2126263 | rs2135745 |
| rs2076211 | rs2082123 | rs2095044 | rs2103132 | rs2110748 | rs2117512 | rs2126264 | rs2135831 |
| rs2076295 | rs2082317 | rs2095092 | rs210314  | rs2110927 | rs211762  | rs2126643 | rs2135880 |
| rs2076308 | rs2082382 | rs2095484 | rs2103655 | rs2110944 | rs2117762 | rs2126736 | rs2135963 |
| rs2076309 | rs2082395 | rs2095921 | rs2103656 | rs2110994 | rs2118022 | rs2127128 | rs2136016 |
| rs2076328 | rs2082412 | rs2095931 | rs210374  | rs2111082 | rs2118138 | rs2127162 | rs213624  |
| rs2076346 | rs2082498 | rs2096219 | rs210381  | rs2111216 | rs2118140 | rs212765  | rs2137234 |
| rs2076363 | rs2082881 | rs2096468 | rs2103901 | rs2111449 | rs2118193 | rs212772  | rs2137277 |
| rs2076421 | rs2082923 | rs2096507 | rs2104038 | rs2111485 | rs211829  | rs2127870 | rs2137283 |
| rs2076438 | rs2083197 | rs2096522 | rs2104047 | rs2111490 | rs2118308 | rs2127965 | rs2137289 |
| rs2076460 | rs2083212 | rs2097247 | rs2104286 | rs2111530 | rs211839  | rs2128344 | rs2137364 |
| rs2076463 | rs2083226 | rs2097282 | rs2104598 | rs2111567 | rs2118611 | rs212837  | rs2137683 |
| rs2076523 | rs2083323 | rs2097326 | rs2104724 | rs2111622 | rs2119137 | rs212857  | rs2137897 |
| rs2076530 | rs2083458 | rs2097352 | rs2105054 | rs2111691 | rs2119151 | rs2128673 | rs2138042 |
| rs2076559 | rs208346  | rs2097442 | rs2105092 | rs2111703 | rs211917  | rs2128739 | rs2138062 |
| rs2076586 | rs2083637 | rs2097677 | rs2105325 | rs2111705 | rs2119260 | rs2128814 | rs2138157 |
| rs2076603 | rs2084007 | rs2097719 | rs2105808 | rs2111807 | rs2119503 | rs2128941 | rs2138161 |
| rs2076674 | rs2084131 | rs2098112 | rs2105841 | rs2111816 | rs2119568 | rs2128944 | rs2138759 |
| rs2076751 | rs2084312 | rs2098226 | rs2105903 | rs2112347 | rs211959  | rs2129561 | rs2138793 |
| rs2076756 | rs2084448 | rs2098297 | rs2105943 | rs211257  | rs2119690 | rs2129869 | rs2138852 |
| rs2077114 | rs2084533 | rs2098321 | rs210621  | rs2112801 | rs2119696 | rs2129977 | rs2139034 |
| rs2077177 | rs2084600 | rs2098322 | rs2106261 | rs2113006 | rs2119704 | rs2129979 | rs2139049 |
| rs2077218 | rs2084607 | rs2098414 | rs210632  | rs2113036 | rs211988  | rs213024  | rs2139376 |
| rs2077224 | rs2085277 | rs2098526 | rs2106450 | rs2113038 | rs211997  | rs2130339 | rs2139559 |
| rs2077235 | rs2085422 | rs2098651 | rs2106525 | rs211315  | rs2120019 | rs2130392 | rs2139629 |
| rs2077316 | rs2085423 | rs2098771 | rs2106727 | rs2113453 | rs2120335 | rs2130499 | rs2139634 |
| rs2077502 | rs2085501 | rs2098918 | rs2106785 | rs2113792 | rs212100  | rs2130604 | rs2139709 |
| rs2077551 | rs2085600 | rs209901  | rs2106786 | rs2113812 | rs2121266 | rs2131167 | rs2139841 |
| rs2077586 | rs2086641 | rs2099052 | rs2106854 | rs2113814 | rs2121279 | rs2131311 | rs2140046 |
| rs2077934 | rs2086945 | rs2099171 | rs2107118 | rs2113818 | rs2121324 | rs2131354 | rs2140316 |
| rs2078064 | rs2087160 | rs2099637 | rs2107135 | rs2113944 | rs2121278 | rs2131371 | rs2140364 |
| rs2078179 | rs2088138 | rs2099684 | rs2107139 | rs2114033 | rs2121875 | rs2131570 | rs2140440 |
| rs2078267 | rs208829  | rs2099744 | rs2107449 | rs2114039 | rs2122113 | rs2131755 | rs2140480 |
| rs2078282 | rs2088913 | rs2100073 | rs2107482 | rs2114210 | rs2122127 | rs2131877 | rs2140483 |
| rs2078317 | rs2089111 | rs2100139 | rs2107538 | rs2114273 | rs2122823 | rs2131919 | rs214053  |
| rs2078339 | rs2089162 | rs2100249 | rs2107595 | rs211433  | rs2122982 | rs2131925 | rs214054  |
| rs2078371 | rs2089164 | rs2100382 | rs2107732 | rs211440  | rs2123340 | rs2132029 | rs214056  |
| rs2078383 | rs2089358 | rs2100651 | rs2107801 | rs2114511 | rs2123536 | rs2132049 | rs214058  |
| rs2078387 | rs2089657 | rs2100692 | rs2107828 | rs2114685 | rs2123685 | rs2132489 | rs2140629 |
| rs2078539 | rs2089848 | rs2100888 | rs2107964 | rs2114718 | rs212388  | rs213273  | rs2140773 |

|           |           |           |           |           |           |           |           |
|-----------|-----------|-----------|-----------|-----------|-----------|-----------|-----------|
| rs214080  | rs2146641 | rs2153304 | rs2160348 | rs2165328 | rs2173650 | rs2181540 | rs2187955 |
| rs214084  | rs2146778 | rs2153463 | rs2160387 | rs2165557 | rs2173714 | rs2181622 | rs2188092 |
| rs2140875 | rs2146819 | rs2153515 | rs2160442 | rs2165670 | rs2173737 | rs2181743 | rs2188151 |
| rs2140910 | rs2146959 | rs2153535 | rs2160514 | rs2165934 | rs217381  | rs2181804 | rs2188177 |
| rs214099  | rs2147112 | rs2153615 | rs2160515 | rs2166181 | rs217386  | rs2181834 | rs2188179 |
| rs2141004 | rs2147141 | rs2153672 | rs2160525 | rs2166365 | rs2173934 | rs2182066 | rs2188380 |
| rs2141247 | rs2147161 | rs2153827 | rs2160588 | rs2166529 | rs217396  | rs2182139 | rs2188554 |
| rs2141284 | rs2147190 | rs2153904 | rs2160669 | rs2166559 | rs2174135 | rs218237  | rs2188717 |
| rs2141746 | rs2147278 | rs2153960 | rs2160729 | rs2166706 | rs2174633 | rs218238  | rs2188836 |
| rs2142141 | rs2147324 | rs2154035 | rs2160783 | rs2166807 | rs217470  | rs2182380 | rs2188848 |
| rs2142308 | rs2147419 | rs215411  | rs2160860 | rs2166811 | rs217514  | rs218239  | rs2188851 |
| rs214246  | rs2147744 | rs215412  | rs2160994 | rs2166862 | rs2175171 | rs2182398 | rs2188962 |
| rs2142672 | rs214782  | rs2154187 | rs216101  | rs2167006 | rs2175177 | rs218240  | rs2188974 |
| rs2142694 | rs214785  | rs2154319 | rs2161037 | rs2167115 | rs2175207 | rs218241  | rs2189008 |
| rs2142718 | rs2147896 | rs2154384 | rs2161097 | rs2167177 | rs2175238 | rs2182410 | rs2189012 |
| rs2143017 | rs2147904 | rs2155076 | rs2161199 | rs2167364 | rs2175420 | rs218243  | rs2189203 |
| rs214310  | rs214803  | rs2155216 | rs2161228 | rs2167750 | rs2175740 | rs218246  | rs2189234 |
| rs2143103 | rs2148200 | rs2155219 | rs2161374 | rs2168101 | rs2175766 | rs218247  | rs2189336 |
| rs2143109 | rs2148204 | rs2155220 | rs216158  | rs2168368 | rs2175824 | rs218251  | rs2189373 |
| rs2143178 | rs2148254 | rs2155243 | rs216172  | rs2168443 | rs2176040 | rs2182517 | rs2189435 |
| rs214321  | rs2148299 | rs2155281 | rs216181  | rs2168518 | rs2176082 | rs218256  | rs2189521 |
| rs2143396 | rs2148307 | rs2155290 | rs2161877 | rs2168711 | rs2176182 | rs218264  | rs2189806 |
| rs2143491 | rs214831  | rs2155292 | rs216191  | rs2168784 | rs2176263 | rs218265  | rs2189965 |
| rs2143571 | rs2148404 | rs2155413 | rs216195  | rs2168855 | rs2176546 | rs2182761 | rs2190097 |
| rs2143583 | rs2148710 | rs215543  | rs2161967 | rs2168889 | rs2176598 | rs2182885 | rs2190500 |
| rs2143606 | rs2149085 | rs2155572 | rs216199  | rs2169033 | rs217669  | rs2183246 | rs2190504 |
| rs2143607 | rs2149108 | rs2155645 | rs2162003 | rs2169282 | rs217672  | rs2183271 | rs2190809 |
| rs2143635 | rs2149150 | rs2155646 | rs2162034 | rs2169287 | rs2176732 | rs2183573 | rs2190864 |
| rs2143668 | rs214934  | rs215600  | rs216205  | rs2169323 | rs2177095 | rs2183745 | rs2190872 |
| rs2143918 | rs2149345 | rs215603  | rs2162137 | rs2169387 | rs217719  | rs2183824 | rs2190989 |
| rs2143919 | rs2149351 | rs215607  | rs2162488 | rs2169642 | rs2177223 | rs2183825 | rs2191130 |
| rs2143950 | rs2149354 | rs215614  | rs2162500 | rs2169762 | rs217727  | rs2183947 | rs2191348 |
| rs2143975 | rs2149355 | rs215628  | rs2162893 | rs2169838 | rs2177535 | rs2184103 | rs2191349 |
| rs2144023 | rs2149841 | rs215632  | rs216303  | rs2169849 | rs2177843 | rs2184364 | rs219140  |
| rs2144184 | rs2149954 | rs215634  | rs2163048 | rs2169955 | rs2178077 | rs2184464 | rs2192158 |
| rs2144300 | rs2150052 | rs215639  | rs216311  | rs2170311 | rs2178197 | rs2184513 | rs2192159 |
| rs2144366 | rs215011  | rs2156552 | rs2163167 | rs2170382 | rs2178452 | rs2184540 | rs2192287 |
| rs2144530 | rs2150165 | rs2156664 | rs2163188 | rs217053  | rs2178487 | rs218476  | rs2192338 |
| rs214467  | rs2150458 | rs2156804 | rs2163226 | rs2171126 | rs2178575 | rs2184968 | rs2192527 |
| rs2144683 | rs2150462 | rs2156805 | rs2163413 | rs217116  | rs2178658 | rs2184971 | rs2192528 |
| rs214475  | rs2150562 | rs2157337 | rs2163503 | rs217120  | rs2178899 | rs2185027 | rs2192768 |
| rs2144827 | rs2150649 | rs215747  | rs2163548 | rs2171690 | rs2179070 | rs2185570 | rs2192932 |
| rs2144940 | rs2150702 | rs2157691 | rs2163761 | rs217179  | rs2179129 | rs2185601 | rs2193054 |
| rs214502  | rs2150864 | rs2157719 | rs2163832 | rs217181  | rs2179152 | rs2185602 | rs2193062 |
| rs2145263 | rs2150879 | rs2157770 | rs2163950 | rs217184  | rs2179372 | rs2185756 | rs2193172 |
| rs2145265 | rs2150968 | rs2157840 | rs2163951 | rs2171973 | rs2179452 | rs2185798 | rs2193255 |
| rs2145270 | rs2150999 | rs2157999 | rs2163971 | rs2171974 | rs2179490 | rs2185913 | rs2193352 |
| rs2145271 | rs2151131 | rs2158007 | rs2164064 | rs2172131 | rs2179593 | rs2186037 | rs2193551 |
| rs2145272 | rs2151280 | rs215815  | rs2164068 | rs2172252 | rs2179687 | rs2186122 | rs2193596 |
| rs2145274 | rs2152090 | rs215816  | rs2164273 | rs217227  | rs2179723 | rs2186245 | rs2193635 |
| rs2145275 | rs215224  | rs2158239 | rs2164300 | rs2172362 | rs2179744 | rs2186369 | rs2193749 |
| rs2145394 | rs2152240 | rs2158379 | rs2164360 | rs2172448 | rs2179795 | rs2186370 | rs2193790 |
| rs2145451 | rs215225  | rs2158507 | rs2164536 | rs217256  | rs2179920 | rs2186607 | rs2193873 |
| rs2145587 | rs215226  | rs2158712 | rs2164552 | rs217287  | rs2180086 | rs2186709 | rs2194025 |
| rs2145598 | rs2152261 | rs2158799 | rs2164553 | rs217289  | rs2180231 | rs2186710 | rs2194027 |
| rs2145600 | rs2152318 | rs2158915 | rs216466  | rs2172935 | rs2180314 | rs2186800 | rs2194028 |
| rs2145623 | rs2152701 | rs2159042 | rs216472  | rs217300  | rs2180341 | rs2186945 | rs2194067 |
| rs2145839 | rs2152735 | rs2159100 | rs2164950 | rs2173019 | rs2180369 | rs2187114 | rs2194178 |
| rs2145943 | rs2152924 | rs2159311 | rs2164968 | rs2173030 | rs2180414 | rs2187375 | rs2194285 |
| rs2145998 | rs2152962 | rs2159544 | rs2164983 | rs2173039 | rs2180439 | rs2187416 | rs2194316 |
| rs2146098 | rs2153101 | rs2159607 | rs2165046 | rs2173201 | rs2180454 | rs2187449 | rs2194411 |
| rs2146180 | rs2153127 | rs2159676 | rs2165107 | rs2173208 | rs2180691 | rs2187642 | rs2194888 |
| rs2146192 | rs2153155 | rs2159778 | rs2165109 | rs2173244 | rs2180769 | rs2187668 | rs2194899 |
| rs214626  | rs2153157 | rs2159935 | rs2165197 | rs217331  | rs2180870 | rs2187670 | rs219493  |
| rs2146324 | rs2153271 | rs2160077 | rs2165239 | rs217339  | rs2181190 | rs2187689 | rs2195041 |
| rs2146423 | rs2153283 | rs2160114 | rs2165241 | rs2173534 | rs2181223 | rs2187692 | rs2195086 |
| rs2146595 | rs2153288 | rs2160203 | rs2165252 | rs217358  | rs2181346 | rs2187953 | rs2195224 |

|           |           |           |           |           |           |           |           |
|-----------|-----------|-----------|-----------|-----------|-----------|-----------|-----------|
| rs2195240 | rs2206271 | rs2215893 | rs2223621 | rs2229616 | rs2234167 | rs2236951 | rs2239222 |
| rs2195525 | rs2206277 | rs2216063 | rs2223745 | rs2229712 | rs2234458 | rs2236952 | rs2239296 |
| rs2195526 | rs2206310 | rs2216084 | rs2223853 | rs2229741 | rs2234675 | rs2236971 | rs2239346 |
| rs2195817 | rs2206437 | rs2216099 | rs2224003 | rs2229742 | rs2234693 | rs2236974 | rs2239347 |
| rs2195987 | rs2206556 | rs2216144 | rs2224202 | rs2229768 | rs2234694 | rs2236989 | rs2239354 |
| rs2196072 | rs2206656 | rs2216153 | rs2224234 | rs2229790 | rs2234711 | rs2237025 | rs2239547 |
| rs2196150 | rs2206734 | rs221616  | rs2224309 | rs2229840 | rs223489  | rs2237028 | rs2239549 |
| rs2196356 | rs2206815 | rs2216405 | rs2224492 | rs2229868 | rs2234922 | rs2237029 | rs2239612 |
| rs2196618 | rs2206925 | rs2216427 | rs222452  | rs2229882 | rs2234962 | rs2237035 | rs2239619 |
| rs2196792 | rs2206929 | rs2216707 | rs2224538 | rs2229961 | rs223498  | rs2237045 | rs2239620 |
| rs2196983 | rs2206940 | rs2216949 | rs2224539 | rs2230061 | rs2235056 | rs2237078 | rs2239626 |
| rs2197012 | rs2207132 | rs2217127 | rs2224797 | rs2230194 | rs2235148 | rs2237149 | rs2239630 |
| rs2197089 | rs2207136 | rs2217170 | rs2224873 | rs2230195 | rs2235215 | rs2237199 | rs2239633 |
| rs2197131 | rs2207139 | rs221721  | rs2224976 | rs2230199 | rs2235229 | rs2237234 | rs2239635 |
| rs2197271 | rs2207173 | rs2217250 | rs222518  | rs2230203 | rs2235302 | rs2237318 | rs2239647 |
| rs2197415 | rs2207195 | rs2217257 | rs2225986 | rs2230278 | rs2235320 | rs2237336 | rs2239668 |
| rs2197585 | rs2207227 | rs2217560 | rs2226284 | rs2230288 | rs2235363 | rs2237402 | rs2239681 |
| rs2197706 | rs2207790 | rs221774  | rs2226683 | rs2230365 | rs2235367 | rs2237403 | rs2239701 |
| rs2197771 | rs2207791 | rs221781  | rs2226970 | rs2230578 | rs2235371 | rs2237422 | rs2239704 |
| rs219778  | rs2207793 | rs221790  | rs2227312 | rs223058  | rs2235485 | rs2237467 | rs2239705 |
| rs219779  | rs2207894 | rs221792  | rs2227336 | rs2230590 | rs2235505 | rs2237474 | rs2239708 |
| rs219780  | rs2207944 | rs221796  | rs2227401 | rs2230600 | rs2235529 | rs2237572 | rs2239748 |
| rs219781  | rs2208338 | rs221797  | rs2227492 | rs2230604 | rs2235544 | rs2237579 | rs2239760 |
| rs2197901 | rs2208368 | rs221798  | rs2227543 | rs2230624 | rs2235571 | rs2237687 | rs2239785 |
| rs2197973 | rs2208395 | rs2218001 | rs2227551 | rs2230641 | rs2235573 | rs2237738 | rs2239805 |
| rs219818  | rs2208397 | rs2218069 | rs2227564 | rs2230657 | rs2235649 | rs2237739 | rs2239815 |
| rs2199036 | rs2208568 | rs2218260 | rs2227607 | rs2230694 | rs2235776 | rs2237886 | rs2239854 |
| rs2199333 | rs2208589 | rs2218650 | rs2227631 | rs2230926 | rs2235826 | rs2237892 | rs2239897 |
| rs2199409 | rs2208590 | rs2218793 | rs2227827 | rs223103  | rs2235874 | rs2237895 | rs2239908 |
| rs2199936 | rs2208649 | rs2218868 | rs2227831 | rs2231142 | rs2235920 | rs2237896 | rs2239923 |
| rs2200019 | rs2209098 | rs221902  | rs2227901 | rs223116  | rs2235932 | rs2237897 | rs2239943 |
| rs2200155 | rs2209440 | rs221907  | rs2227930 | rs2231265 | rs2235989 | rs2238109 | rs2240060 |
| rs2200225 | rs2209457 | rs2219143 | rs2227948 | rs2231495 | rs2235997 | rs2238126 | rs2240128 |
| rs2200583 | rs220970  | rs2219320 | rs2227955 | rs2231884 | rs2236007 | rs2238151 | rs2240147 |
| rs2200733 | rs2209760 | rs2219538 | rs2228015 | rs2232016 | rs2236033 | rs2238153 | rs2240239 |
| rs2201003 | rs2210054 | rs2219647 | rs2228079 | rs2232193 | rs223604  | rs2238162 | rs2240276 |
| rs2201150 | rs221013  | rs221988  | rs2228100 | rs2232326 | rs2236074 | rs223819  | rs2240278 |
| rs2201453 | rs2210366 | rs2219939 | rs2228139 | rs2232346 | rs2236164 | rs2238199 | rs224029  |
| rs2201584 | rs2210903 | rs2219968 | rs2228145 | rs2232359 | rs2236180 | rs2238280 | rs2240294 |
| rs2201637 | rs2211595 | rs2220024 | rs2228213 | rs2232423 | rs2236212 | rs2238300 | rs2240328 |
| rs2201841 | rs2212333 | rs2220051 | rs2228243 | rs2232613 | rs2236256 | rs2238366 | rs2240335 |
| rs2201862 | rs2212430 | rs2220243 | rs222826  | rs2232710 | rs2236262 | rs2238368 | rs2240336 |
| rs220193  | rs2212434 | rs2220253 | rs2228273 | rs2232831 | rs2236263 | rs2238435 | rs2240339 |
| rs2202237 | rs2212450 | rs222026  | rs2228445 | rs2232839 | rs2236293 | rs2238464 | rs224045  |
| rs2202282 | rs2212597 | rs2220427 | rs2228467 | rs223290  | rs2236295 | rs2238529 | rs2240466 |
| rs2202454 | rs2212617 | rs222047  | rs2228468 | rs2232967 | rs2236313 | rs2238641 | rs2240533 |
| rs220249  | rs2212656 | rs2220599 | rs2228479 | rs223308  | rs2236379 | rs2238647 | rs2240621 |
| rs2202509 | rs2212723 | rs2220856 | rs222852  | rs2233152 | rs2236407 | rs2238651 | rs224063  |
| rs2202572 | rs2212930 | rs2220926 | rs2228547 | rs2233154 | rs2236496 | rs2238675 | rs2240715 |
| rs220262  | rs2212931 | rs2220970 | rs2228552 | rs2233159 | rs2236497 | rs2238686 | rs2240716 |
| rs2202895 | rs2213020 | rs2221119 | rs222857  | rs2233253 | rs2236498 | rs2238689 | rs2240736 |
| rs2203098 | rs2213169 | rs2221310 | rs2228570 | rs2233278 | rs2236507 | rs2238691 | rs2240751 |
| rs2203197 | rs221326  | rs2221516 | rs2228603 | rs2233287 | rs2236519 | rs2238732 | rs2240775 |
| rs2203452 | rs2213290 | rs2221534 | rs2228671 | rs2233324 | rs2236521 | rs2238754 | rs2240781 |
| rs220358  | rs2213581 | rs2221593 | rs2229092 | rs2233424 | rs2236553 | rs2238776 | rs224082  |
| rs2203644 | rs2213751 | rs2221641 | rs2229094 | rs2233434 | rs2236582 | rs2238781 | rs2240857 |
| rs2203949 | rs2214107 | rs2221651 | rs2229116 | rs2233580 | rs2236653 | rs2238782 | rs2240885 |
| rs2204008 | rs2214214 | rs2222016 | rs2229188 | rs223361  | rs2236659 | rs2238783 | rs224090  |
| rs2204015 | rs2214258 | rs2222018 | rs2229330 | rs2233688 | rs2236688 | rs2238787 | rs2240919 |
| rs2204886 | rs2214302 | rs2222543 | rs2229331 | rs2233713 | rs2236708 | rs2238792 | rs2240920 |
| rs2204928 | rs2214442 | rs2222544 | rs2229357 | rs2233956 | rs2236744 | rs2238799 | rs2241003 |
| rs2205129 | rs2214683 | rs2222746 | rs2229383 | rs2233974 | rs2236836 | rs223889  | rs2241024 |
| rs2205260 | rs2215184 | rs2223043 | rs2229437 | rs2233980 | rs2236918 | rs2239017 | rs2241047 |
| rs220558  | rs2215535 | rs2223089 | rs2229450 | rs223401  | rs2236939 | rs2239030 | rs2241058 |
| rs2205895 | rs2215590 | rs2223286 | rs2229498 | rs2234052 | rs2236941 | rs2239063 | rs2241059 |
| rs2205960 | rs2215810 | rs2223303 | rs2229542 | rs2234067 | rs2236947 | rs2239196 | rs2241069 |
| rs2205986 | rs221584  | rs2223620 | rs2229586 | rs2234161 | rs2236950 | rs2239200 | rs2241106 |

|           |           |           |           |           |           |           |           |
|-----------|-----------|-----------|-----------|-----------|-----------|-----------|-----------|
| rs224111  | rs2243857 | rs2247856 | rs2251963 | rs2256183 | rs2266782 | rs2270431 | rs2273558 |
| rs2241116 | rs2243873 | rs2247870 | rs2252003 | rs2256191 | rs2266788 | rs2270445 | rs2273573 |
| rs2241153 | rs2243930 | rs2247876 | rs2252074 | rs2256332 | rs2266925 | rs227051  | rs2273640 |
| rs2241170 | rs2244012 | rs2248116 | rs2252115 | rs2256339 | rs2266928 | rs2270518 | rs2273647 |
| rs2241173 | rs2244020 | rs2248137 | rs2252220 | rs2256368 | rs2266959 | rs227079  | rs2273653 |
| rs2241208 | rs2244133 | rs2248179 | rs2252221 | rs2256459 | rs2266961 | rs227080  | rs2273669 |
| rs2241210 | rs2244237 | rs2248244 | rs2252225 | rs2256460 | rs2266963 | rs2270812 | rs2273684 |
| rs2241212 | rs224424  | rs2248300 | rs2252281 | rs2256464 | rs2267137 | rs2270813 | rs2273699 |
| rs2241261 | rs2244352 | rs2248325 | rs2252383 | rs2256609 | rs2267158 | rs2270860 | rs227370  |
| rs2241339 | rs2244404 | rs2248359 | rs2252397 | rs2256752 | rs2267160 | rs2270894 | rs2273720 |
| rs224136  | rs2244461 | rs2248372 | rs225245  | rs2256814 | rs2267161 | rs2270927 | rs2273736 |
| rs2241382 | rs2244479 | rs2248393 | rs2252641 | rs2256923 | rs2267370 | rs2270968 | rs2273799 |
| rs2241384 | rs2244503 | rs2248462 | rs2252686 | rs2256965 | rs2267372 | rs2271025 | rs2273833 |
| rs2241388 | rs2244552 | rs2248551 | rs2252725 | rs2256974 | rs2267373 | rs2271049 | rs2273844 |
| rs2241399 | rs2244592 | rs2248699 | rs2252790 | rs2257011 | rs2267375 | rs2271176 | rs2273898 |
| rs2241420 | rs2244608 | rs2248799 | rs225285  | rs2257081 | rs2267407 | rs2271194 | rs2273905 |
| rs2241423 | rs2244625 | rs2248863 | rs2252865 | rs2257129 | rs2267442 | rs2271266 | rs2273979 |
| rs224143  | rs2244643 | rs2248894 | rs225289  | rs2257167 | rs2267630 | rs2271293 | rs2273991 |
| rs2241432 | rs2244894 | rs2248979 | rs225295  | rs225717  | rs2267633 | rs2271316 | rs2274096 |
| rs2241443 | rs2244956 | rs2249105 | rs2253017 | rs2257212 | rs2267708 | rs2271329 | rs2274115 |
| rs2241584 | rs2245133 | rs2249193 | rs2253118 | rs2257791 | rs2267846 | rs2271352 | rs2274116 |
| rs2241714 | rs2245214 | rs2249195 | rs2253201 | rs2257883 | rs2267958 | rs2271400 | rs2274159 |
| rs2241738 | rs2245310 | rs2249250 | rs2253204 | rs2257906 | rs2268078 | rs2271483 | rs2274223 |
| rs2241743 | rs2245368 | rs2249325 | rs2253310 | rs2258238 | rs2268118 | rs2271494 | rs2274224 |
| rs224187  | rs2245460 | rs2249350 | rs2253717 | rs2258404 | rs2268127 | rs2271543 | rs227425  |
| rs2241880 | rs2245477 | rs2249498 | rs2253736 | rs225847  | rs2268176 | rs2271613 | rs227426  |
| rs2241883 | rs2245569 | rs2249581 | rs2253762 | rs2259243 | rs2268361 | rs227163  | rs2274273 |
| rs2241894 | rs2245586 | rs2249742 | rs2253823 | rs2259305 | rs2268382 | rs227178  | rs2274316 |
| rs2241899 | rs2245601 | rs2249825 | rs2253837 | rs2259384 | rs2268575 | rs227179  | rs2274319 |
| rs2241950 | rs2245611 | rs2249872 | rs2253918 | rs2259816 | rs2268607 | rs2271804 | rs2274351 |
| rs2242000 | rs2245698 | rs2249935 | rs2253944 | rs2259855 | rs2268667 | rs2271893 | rs2274432 |
| rs2242090 | rs2245737 | rs2249989 | rs2254050 | rs2259857 | rs2268695 | rs2271928 | rs2274465 |
| rs2242116 | rs2245793 | rs2250010 | rs2254069 | rs2259858 | rs2268719 | rs227199  | rs227448  |
| rs2242195 | rs2245801 | rs2250065 | rs2254075 | rs2259883 | rs2268748 | rs2272007 | rs2274538 |
| rs2242241 | rs2245867 | rs2250067 | rs2254240 | rs2260051 | rs2268762 | rs2272030 | rs2274558 |
| rs2242258 | rs2245899 | rs2250106 | rs2254303 | rs226007  | rs2268796 | rs2272046 | rs2274611 |
| rs2242285 | rs2245901 | rs2250127 | rs2254458 | rs2260230 | rs2268840 | rs227206  | rs2274685 |
| rs2242288 | rs2246012 | rs225014  | rs2254479 | rs2260850 | rs2268894 | rs2272095 | rs2274700 |
| rs2242313 | rs2246208 | rs2250301 | rs2254537 | rs226090  | rs2268967 | rs2272111 | rs2274780 |
| rs2242420 | rs2246221 | rs2250320 | rs2254546 | rs2260997 | rs2268981 | rs2272163 | rs2274782 |
| rs2242449 | rs2246223 | rs2250322 | rs2254594 | rs2261003 | rs2269060 | rs2272205 | rs2274784 |
| rs2242500 | rs2246363 | rs2250417 | rs2254681 | rs2261033 | rs2269188 | rs2272224 | rs2274793 |
| rs2242508 | rs2246434 | rs2250430 | rs2254690 | rs2261092 | rs2269233 | rs2272313 | rs2274910 |
| rs2242511 | rs2246438 | rs2250598 | rs2254710 | rs2261181 | rs2269245 | rs2272402 | rs2275003 |
| rs2242517 | rs2246469 | rs2250635 | rs2254958 | rs2261201 | rs2269247 | rs2272443 | rs2275004 |
| rs2242522 | rs2246623 | rs2250644 | rs2255088 | rs2261360 | rs2269368 | rs2272461 | rs227507  |
| rs2242602 | rs2246661 | rs2250660 | rs2255141 | rs2261434 | rs2269372 | rs2272566 | rs2275085 |
| rs2242652 | rs2246662 | rs2250802 | rs2255158 | rs2261608 | rs2269420 | rs2272719 | rs2275180 |
| rs2242653 | rs2246754 | rs2250889 | rs2255214 | rs2261980 | rs2269426 | rs227275  | rs2275241 |
| rs224278  | rs2246828 | rs2251069 | rs2255221 | rs2262207 | rs2269434 | rs2272774 | rs2275244 |
| rs2242886 | rs2246832 | rs2251086 | rs2255280 | rs2262535 | rs2269476 | rs2272783 | rs2275247 |
| rs2242892 | rs2246873 | rs2251171 | rs2255293 | rs2262536 | rs2269486 | rs2272790 | rs2275372 |
| rs2242900 | rs2246941 | rs2251188 | rs2255336 | rs2263122 | rs2269497 | rs227283  | rs2275426 |
| rs2242944 | rs2246942 | rs2251219 | rs2255424 | rs2263298 | rs2269530 | rs2272900 | rs2275516 |
| rs2243086 | rs2246943 | rs2251244 | rs2255531 | rs2263321 | rs2269615 | rs2273017 | rs2275558 |
| rs2243103 | rs2247015 | rs2251250 | rs2255591 | rs2263329 | rs2269705 | rs2273042 | rs2275560 |
| rs224329  | rs2247056 | rs2251260 | rs2255624 | rs2263608 | rs2269710 | rs2273085 | rs2275565 |
| rs2243297 | rs224709  | rs2251361 | rs2255703 | rs2264306 | rs2269822 | rs2273113 | rs2275606 |
| rs224331  | rs2247213 | rs2251396 | rs2255735 | rs2264750 | rs2269841 | rs2273121 | rs2275641 |
| rs224333  | rs2247314 | rs2251468 | rs2255811 | rs2264901 | rs2269906 | rs2273171 | rs2275652 |
| rs2243389 | rs2247341 | rs2251499 | rs2255927 | rs2265097 | rs2269936 | rs2273215 | rs2275707 |
| rs2243517 | rs2247355 | rs2251551 | rs2256027 | rs2265146 | rs2269954 | rs2273291 | rs2275806 |
| rs2243547 | rs2247396 | rs2251655 | rs2256036 | rs2265155 | rs2269957 | rs2273368 | rs227584  |
| rs2243558 | rs2247523 | rs2251732 | rs2256040 | rs2265158 | rs2269996 | rs2273446 | rs2275902 |
| rs2243602 | rs2247607 | rs2251746 | rs2256086 | rs2265179 | rs2269997 | rs2273475 | rs2275984 |
| rs2243616 | rs2247627 | rs2251830 | rs2256126 | rs2265189 | rs2270204 | rs2273500 | rs2276016 |
| rs2243834 | rs2247744 | rs2251844 | rs2256175 | rs2265978 | rs2270368 | rs2273555 | rs2276066 |

|           |           |           |           |           |           |           |           |
|-----------|-----------|-----------|-----------|-----------|-----------|-----------|-----------|
| rs2276074 | rs2279008 | rs2281845 | rs2285703 | rs2288789 | rs2291133 | rs2293607 | rs2296610 |
| rs2276109 | rs2279183 | rs2282040 | rs2285803 | rs2288874 | rs2291160 | rs2293616 | rs2296618 |
| rs2276118 | rs2279238 | rs2282064 | rs2285810 | rs2288904 | rs2291241 | rs2293688 | rs2296624 |
| rs227618  | rs2279337 | rs2282143 | rs2285912 | rs2288926 | rs2291256 | rs2293751 | rs229674  |
| rs2276209 | rs227934  | rs2282248 | rs2285947 | rs2288937 | rs2291266 | rs2293847 | rs2296740 |
| rs2276267 | rs2279351 | rs2282326 | rs228595  | rs2289002 | rs2291317 | rs2293871 | rs2296793 |
| rs2276390 | rs2279415 | rs2282377 | rs2285951 | rs2289047 | rs2291347 | rs2293888 | rs2297066 |
| rs2276405 | rs2279434 | rs2282456 | rs228611  | rs2289057 | rs2291428 | rs2293889 | rs2297067 |
| rs2276449 | rs2279463 | rs2282526 | rs2286149 | rs228907  | rs2291429 | rs2293922 | rs2297236 |
| rs227646  | rs2279469 | rs2282546 | rs2286200 | rs2289081 | rs2291435 | rs2293941 | rs2297293 |
| rs2276543 | rs2279516 | rs2282655 | rs2286241 | rs228910  | rs2291437 | rs2293947 | rs2297363 |
| rs2276559 | rs2279561 | rs2282679 | rs2286276 | rs2289124 | rs2291467 | rs2294008 | rs2297374 |
| rs2276724 | rs2279574 | rs2282718 | rs2286351 | rs2289125 | rs2291477 | rs2294025 | rs2297402 |
| rs2276749 | rs2279590 | rs2282802 | rs2286466 | rs228916  | rs2291506 | rs2294081 | rs2297412 |
| rs2276815 | rs2279681 | rs2282867 | rs2286490 | rs228917  | rs2291542 | rs2294086 | rs2297433 |
| rs2276823 | rs2279699 | rs2282930 | rs2286503 | rs228918  | rs2291589 | rs2294120 | rs2297440 |
| rs2276824 | rs2279743 | rs2282978 | rs2286525 | rs2289187 | rs2291609 | rs2294195 | rs2297441 |
| rs2276825 | rs2279829 | rs2282979 | rs2286526 | rs2289195 | rs2291652 | rs2294196 | rs2297508 |
| rs2276834 | rs2279830 | rs2282990 | rs228654  | rs2289198 | rs229168  | rs2294203 | rs2297550 |
| rs2276838 | rs2279948 | rs2283    | rs2286599 | rs228922  | rs2291681 | rs2294214 | rs2297559 |
| rs2276854 | rs2279965 | rs2283076 | rs2286664 | rs228925  | rs2291813 | rs2294239 | rs2297605 |
| rs2277027 | rs2279974 | rs2283079 | rs2286672 | rs2289252 | rs2291900 | rs2294256 | rs2297644 |
| rs2277083 | rs2279990 | rs2283102 | rs2286729 | rs2289261 | rs2292056 | rs2294261 | rs2297792 |
| rs227724  | rs2280011 | rs2283163 | rs2286798 | rs2289276 | rs2292096 | rs2294358 | rs2297797 |
| rs227727  | rs2280018 | rs2283220 | rs2286870 | rs2289278 | rs2292111 | rs2294405 | rs2297909 |
| rs227728  | rs2280028 | rs2283228 | rs2286963 | rs2289300 | rs2292123 | rs2294426 | rs2297987 |
| rs2277283 | rs2280104 | rs2283274 | rs2286965 | rs2289308 | rs2292239 | rs2294433 | rs2297991 |
| rs227731  | rs2280141 | rs2283335 | rs2286974 | rs2289328 | rs2292305 | rs2294450 | rs2298058 |
| rs227733  | rs2280195 | rs2283487 | rs2286975 | rs2289379 | rs2292318 | rs2294664 | rs2298117 |
| rs2277339 | rs2280231 | rs2283760 | rs2287002 | rs2289511 | rs2292327 | rs2294693 | rs2298214 |
| rs2277383 | rs2280235 | rs2283790 | rs2287019 | rs228953  | rs2292334 | rs2294736 | rs2298396 |
| rs2277413 | rs2280301 | rs2283792 | rs2287037 | rs2289583 | rs2292342 | rs2294861 | rs2298428 |
| rs227745  | rs2280302 | rs2283824 | rs2287051 | rs2289635 | rs2292462 | rs2294871 | rs2298489 |
| rs2277458 | rs2280334 | rs2283847 | rs2287173 | rs2289702 | rs2292533 | rs2294875 | rs2298527 |
| rs2277499 | rs2280401 | rs2283865 | rs2287197 | rs2289731 | rs2292553 | rs2294915 | rs2298585 |
| rs2277509 | rs2280405 | rs2283873 | rs2287198 | rs2289739 | rs2292572 | rs229492  | rs2298624 |
| rs2277598 | rs2280406 | rs2284033 | rs2287226 | rs2289743 | rs2292604 | rs2295094 | rs2298632 |
| rs2277788 | rs2280447 | rs2284063 | rs2287254 | rs2289746 | rs2292626 | rs2295124 | rs2298656 |
| rs2277834 | rs2280470 | rs2284174 | rs228726  | rs2289790 | rs2292662 | rs2295125 | rs2298711 |
| rs2277844 | rs2280503 | rs2284178 | rs2287283 | rs2289791 | rs2292664 | rs229527  | rs2298716 |
| rs2277862 | rs2280530 | rs2284265 | rs2287322 | rs2289833 | rs2292759 | rs229533  | rs2298720 |
| rs2277899 | rs2280543 | rs2284344 | rs2287327 | rs2289863 | rs2292804 | rs2295334 | rs2298755 |
| rs2277972 | rs2280711 | rs2284367 | rs2287348 | rs2289933 | rs2292852 | rs2295363 | rs2298807 |
| rs2277989 | rs2280774 | rs2284378 | rs2287528 | rs2289976 | rs2292884 | rs2295366 | rs2298850 |
| rs2277998 | rs228081  | rs2284550 | rs2287541 | rs2290159 | rs2292910 | rs229540  | rs2298952 |
| rs227808  | rs2280861 | rs2284553 | rs2287571 | rs2290199 | rs2292959 | rs229541  | rs2298969 |
| rs2278089 | rs2280870 | rs2284665 | rs2287621 | rs2290202 | rs2292982 | rs2295463 | rs2298989 |
| rs227819  | rs2280885 | rs2284706 | rs2287622 | rs2290203 | rs2292989 | rs2295499 | rs2298995 |
| rs2278236 | rs2281097 | rs2284746 | rs2287623 | rs2290263 | rs2293010 | rs2295545 | rs2299012 |
| rs2278243 | rs2281135 | rs2284801 | rs2287644 | rs2290273 | rs2293018 | rs2295602 | rs2299055 |
| rs2278271 | rs2281148 | rs2284871 | rs228769  | rs2290395 | rs2293088 | rs2295786 | rs2299098 |
| rs227833  | rs2281226 | rs2284878 | rs2287838 | rs2290400 | rs2293093 | rs2295888 | rs2299156 |
| rs2278426 | rs2281276 | rs2285002 | rs2287842 | rs2290547 | rs2293152 | rs229591  | rs2299247 |
| rs2278428 | rs2281279 | rs2285005 | rs2287878 | rs2290572 | rs2293256 | rs2296028 | rs229925  |
| rs2278464 | rs2281288 | rs2285170 | rs2287921 | rs2290601 | rs2293259 | rs2296065 | rs229932  |
| rs227847  | rs2281293 | rs2285198 | rs2287922 | rs2290608 | rs2293289 | rs2296172 | rs2299346 |
| rs2278483 | rs2281388 | rs2285248 | rs2287926 | rs2290610 | rs2293304 | rs2296173 | rs2299379 |
| rs2278524 | rs2281525 | rs2285261 | rs2287997 | rs2290669 | rs2293370 | rs2296285 | rs2299383 |
| rs2278557 | rs2281603 | rs2285340 | rs2288004 | rs2290707 | rs229340  | rs2296311 | rs2299409 |
| rs2278600 | rs2281718 | rs2285394 | rs2288158 | rs2290758 | rs2293400 | rs2296316 | rs2299502 |
| rs2278609 | rs2281719 | rs2285440 | rs2288276 | rs2290769 | rs2293445 | rs2296322 | rs2299864 |
| rs2278613 | rs2281721 | rs2285450 | rs2288278 | rs2290846 | rs2293476 | rs229635  | rs2300092 |
| rs2278668 | rs2281727 | rs2285627 | rs2288327 | rs2290850 | rs2293576 | rs2296483 | rs2300149 |
| rs2278796 | rs2281808 | rs2285640 | rs228836  | rs2290893 | rs2293579 | rs2296573 | rs2300206 |
| rs2278806 | rs2281819 | rs2285644 | rs2288419 | rs229100  | rs2293581 | rs2296576 | rs2300290 |
| rs2278832 | rs2281827 | rs2285657 | rs2288634 | rs2291079 | rs2293582 | rs2296580 | rs2300441 |
| rs2278907 | rs2281841 | rs228568  | rs2288706 | rs2291120 | rs2293606 | rs229660  | rs2300478 |



|           |           |           |           |           |           |           |           |
|-----------|-----------|-----------|-----------|-----------|-----------|-----------|-----------|
| rs2300481 | rs2303384 | rs2305929 | rs2313571 | rs2321993 | rs2331978 | rs2340688 | rs2350818 |
| rs2300519 | rs2303566 | rs2305948 | rs231361  | rs2322192 | rs2332035 | rs2340727 | rs2350892 |
| rs2300598 | rs2303597 | rs2306022 | rs231362  | rs2322549 | rs2332036 | rs2340902 | rs2351491 |
| rs2300603 | rs2303635 | rs2306027 | rs231398  | rs2322599 | rs2332050 | rs2340911 | rs2351774 |
| rs2300668 | rs2303696 | rs2306032 | rs2314338 | rs2322605 | rs2332058 | rs2341108 | rs2351959 |
| rs2300669 | rs2303700 | rs2306050 | rs2314670 | rs2322622 | rs2332175 | rs2341264 | rs2352036 |
| rs2300747 | rs2303751 | rs2306061 | rs2314686 | rs2322633 | rs2332179 | rs2341459 | rs2352723 |
| rs2300775 | rs2303759 | rs2306180 | rs2315008 | rs2323183 | rs2332328 | rs2341599 | rs2352744 |
| rs2300861 | rs2303790 | rs2306191 | rs2315024 | rs2323458 | rs2332462 | rs2341780 | rs2352767 |
| rs2301216 | rs2303865 | rs2306216 | rs2315065 | rs2323533 | rs2332700 | rs2341873 | rs2352795 |
| rs2301249 | rs2303907 | rs2306272 | rs2315646 | rs2324229 | rs2332719 | rs2342371 | rs2352800 |
| rs2301271 | rs2303929 | rs2306363 | rs2315837 | rs2324499 | rs2333024 | rs2342406 | rs2352886 |
| rs2301274 | rs2303931 | rs2306374 | rs2316121 | rs232464  | rs2333321 | rs2342502 | rs2352974 |
| rs2301275 | rs2303948 | rs2306486 | rs2316172 | rs2324873 | rs2333469 | rs2342776 | rs2352975 |
| rs2301287 | rs2304058 | rs2306547 | rs2316205 | rs232496  | rs2333496 | rs234280  | rs2353082 |
| rs2301343 | rs2304088 | rs2306556 | rs2316515 | rs232499  | rs2333604 | rs2342883 | rs235314  |
| rs2301436 | rs2304098 | rs2306589 | rs2316793 | rs2324999 | rs2333607 | rs2342892 | rs2353398 |
| rs2301522 | rs2304128 | rs2306590 | rs2316806 | rs2325036 | rs2334232 | rs2343506 | rs2353663 |
| rs2301551 | rs2304130 | rs2306593 | rs231708  | rs2325291 | rs233438  | rs2343551 | rs235374  |
| rs2301573 | rs2304176 | rs2306700 | rs2317230 | rs2325788 | rs233449  | rs2343592 | rs2353940 |
| rs2301597 | rs2304192 | rs2306786 | rs2317231 | rs2325885 | rs2335    | rs2343593 | rs2353984 |
| rs2301613 | rs2304206 | rs2306791 | rs231725  | rs2326005 | rs2335077 | rs2343616 | rs2354167 |
| rs2301680 | rs2304256 | rs2306847 | rs231726  | rs2326100 | rs2335235 | rs2343681 | rs2354413 |
| rs2301696 | rs2304269 | rs2306848 | rs231735  | rs2326124 | rs2335236 | rs2344121 | rs235485  |
| rs2301712 | rs2304300 | rs2306866 | rs2317440 | rs2326201 | rs2335418 | rs2344205 | rs2354862 |
| rs2301718 | rs2304336 | rs2306969 | rs2317497 | rs2326420 | rs2335455 | rs2344686 | rs2355125 |
| rs2301790 | rs2304340 | rs2307019 | rs231770  | rs2326451 | rs2335534 | rs2344704 | rs2355182 |
| rs2301813 | rs2304456 | rs2307022 | rs231775  | rs2326458 | rs2335708 | rs2344744 | rs2355235 |
| rs2301888 | rs2304467 | rs2307024 | rs231779  | rs2326524 | rs2335859 | rs2344825 | rs2355237 |
| rs2301889 | rs2304527 | rs2307111 | rs231793  | rs232660  | rs2336384 | rs2344965 | rs2355433 |
| rs2301984 | rs2304595 | rs2307121 | rs2317961 | rs2326788 | rs2336670 | rs2344976 | rs2355610 |
| rs2302006 | rs2304607 | rs2307246 | rs231804  | rs2326837 | rs2336713 | rs2345404 | rs2356369 |
| rs2302011 | rs2304608 | rs2307394 | rs2318131 | rs2326838 | rs2336714 | rs2345443 | rs2356864 |
| rs230203  | rs2304615 | rs2307449 | rs2318350 | rs2326842 | rs2336721 | rs2345667 | rs2357176 |
| rs2302061 | rs2304645 | rs2307561 | rs2318540 | rs2327121 | rs2336725 | rs2345701 | rs2357623 |
| rs230218  | rs2304655 | rs2307823 | rs2318543 | rs2327129 | rs2336897 | rs2345872 | rs235770  |
| rs2302189 | rs2304667 | rs2307857 | rs2318763 | rs2327222 | rs2336938 | rs2345941 | rs2357760 |
| rs2302237 | rs2304693 | rs2308217 | rs231878  | rs2327429 | rs2337033 | rs2346066 | rs2358067 |
| rs2302264 | rs2304776 | rs2308219 | rs231889  | rs2327436 | rs2337106 | rs2346133 | rs2358073 |
| rs2302367 | rs230489  | rs2308253 | rs231906  | rs2327527 | rs2337143 | rs2346264 | rs2358443 |
| rs2302417 | rs2304987 | rs2309426 | rs2319280 | rs2327528 | rs2337157 | rs2346268 | rs2358483 |
| rs2302429 | rs230501  | rs2309752 | rs2319516 | rs2327531 | rs233716  | rs2346449 | rs2358581 |
| rs2302464 | rs2305013 | rs2309753 | rs2319545 | rs2327586 | rs233721  | rs2346605 | rs2358628 |
| rs2302465 | rs230503  | rs2309757 | rs2319626 | rs2327650 | rs2337699 | rs234709  | rs2358740 |
| rs2302524 | rs230504  | rs2309812 | rs231976  | rs2327777 | rs2338016 | rs234714  | rs235887  |
| rs2302588 | rs230509  | rs2309957 | rs231977  | rs2327832 | rs2338021 | rs2347498 | rs2358954 |
| rs2302593 | rs230511  | rs2309996 | rs231988  | rs2327958 | rs2338104 | rs2347694 | rs2358994 |
| rs2302612 | rs2305144 | rs2310173 | rs232001  | rs2327990 | rs233811  | rs2347696 | rs2359171 |
| rs2302621 | rs2305196 | rs2310313 | rs2320118 | rs2328223 | rs2338115 | rs2347699 | rs2359180 |
| rs2302643 | rs230523  | rs2310357 | rs2320125 | rs2328370 | rs2338224 | rs2347729 | rs2359239 |
| rs2302757 | rs230525  | rs2310752 | rs2320163 | rs2328530 | rs2338701 | rs2347784 | rs2359324 |
| rs2302758 | rs230533  | rs2310792 | rs2320172 | rs2328546 | rs2338747 | rs2347808 | rs23595   |
| rs2302759 | rs230534  | rs2311380 | rs232054  | rs2328765 | rs2338796 | rs2347867 | rs2359536 |
| rs2302774 | rs230539  | rs2311412 | rs2320549 | rs2328887 | rs2338823 | rs2347923 | rs2359644 |
| rs2302776 | rs230540  | rs2311597 | rs2320587 | rs2328945 | rs2338971 | rs2348072 | rs2359714 |
| rs2302783 | rs2305411 | rs2311837 | rs2320588 | rs2329086 | rs2339171 | rs2348180 | rs2359936 |
| rs2302832 | rs230542  | rs2312064 | rs2320925 | rs2329483 | rs2339219 | rs2348418 | rs2360675 |
| rs2302898 | rs2305479 | rs2312147 | rs232094  | rs2329567 | rs2339234 | rs234853  | rs2360742 |
| rs2302900 | rs2305480 | rs2312193 | rs2321157 | rs2329877 | rs233937  | rs234864  | rs2360748 |
| rs2302904 | rs2305482 | rs231237  | rs2321235 | rs233042  | rs2339515 | rs2349073 | rs2360806 |
| rs2302976 | rs2305489 | rs2312491 | rs2321236 | rs2330627 | rs2339519 | rs2349648 | rs2360962 |
| rs2303040 | rs2305710 | rs2313211 | rs2321388 | rs2330634 | rs233953  | rs2350064 | rs2360970 |
| rs2303100 | rs2305742 | rs231349  | rs2321503 | rs2330783 | rs2339717 | rs2350085 | rs2361017 |
| rs2303108 | rs2305743 | rs2313526 | rs2321536 | rs2330809 | rs2339938 | rs2350479 | rs236114  |
| rs2303149 | rs2305769 | rs231353  | rs232159  | rs2331174 | rs2340403 | rs2350578 | rs2361151 |
| rs2303361 | rs2305771 | rs2313532 | rs2321706 | rs2331841 | rs234043  | rs2350782 | rs2361274 |
| rs2303369 | rs2305814 | rs231356  | rs2321882 | rs2331964 | rs234051  | rs2350809 | rs2361355 |

|           |           |           |           |           |           |           |           |
|-----------|-----------|-----------|-----------|-----------|-----------|-----------|-----------|
| rs2361478 | rs236911  | rs2380472 | rs2389643 | rs2395792 | rs2408224 | rs2414072 | rs242132  |
| rs2361502 | rs2369135 | rs2380606 | rs2389880 | rs2395811 | rs2408252 | rs2414073 | rs2421326 |
| rs2361710 | rs236918  | rs238073  | rs2389919 | rs2395906 | rs2408436 | rs2414095 | rs2421332 |
| rs2361715 | rs2369280 | rs2380937 | rs2389922 | rs2395943 | rs2408508 | rs2414098 | rs2421552 |
| rs2361755 | rs2369391 | rs2381145 | rs2390124 | rs2396004 | rs2408766 | rs2414178 | rs2421556 |
| rs2361763 | rs2369633 | rs238135  | rs2390258 | rs2396083 | rs2408955 | rs241428  | rs2421647 |
| rs2361796 | rs2369842 | rs238136  | rs2390314 | rs2396084 | rs2409095 | rs241443  | rs2421648 |
| rs2361797 | rs236996  | rs2381416 | rs2390536 | rs2396133 | rs240955  | rs2414577 | rs2421667 |
| rs2362290 | rs2370515 | rs238164  | rs2390669 | rs2396315 | rs240963  | rs2414679 | rs2421822 |
| rs2362529 | rs2370794 | rs2381712 | rs2390793 | rs2396359 | rs2409652 | rs2414718 | rs2421897 |
| rs2362541 | rs2370823 | rs2381759 | rs2390982 | rs2396497 | rs2409691 | rs2414739 | rs2421986 |
| rs2362775 | rs2370901 | rs2381760 | rs2391139 | rs2396502 | rs2409701 | rs2414884 | rs2422073 |
| rs2362965 | rs2370983 | rs2381977 | rs2391388 | rs2396625 | rs2409721 | rs2415038 | rs2422134 |
| rs236318  | rs2371108 | rs2382562 | rs2391448 | rs2396719 | rs2409722 | rs2415130 | rs2422136 |
| rs2363340 | rs2371220 | rs2382817 | rs2391540 | rs2396726 | rs2409742 | rs2415140 | rs2422137 |
| rs236346  | rs2371447 | rs2382818 | rs2391734 | rs239677  | rs2409743 | rs2415142 | rs2422141 |
| rs236349  | rs2371627 | rs2382825 | rs2391769 | rs2397112 | rs2409749 | rs2415209 | rs2422254 |
| rs236352  | rs2371767 | rs238295  | rs239198  | rs2398113 | rs2409764 | rs241558  | rs2422276 |
| rs2363719 | rs2372671 | rs2383101 | rs2392186 | rs2398144 | rs2409780 | rs2415725 | rs2422277 |
| rs2363956 | rs2372716 | rs2383207 | rs2392239 | rs2398227 | rs2409781 | rs2415984 | rs2422286 |
| rs2364349 | rs2372785 | rs2383208 | rs239245  | rs2398629 | rs2409797 | rs2416114 | rs2422320 |
| rs2364368 | rs2373000 | rs2383377 | rs239260  | rs2398861 | rs2409836 | rs2416214 | rs2422321 |
| rs2364400 | rs2373078 | rs2383531 | rs2392780 | rs2398893 | rs240993  | rs2416465 | rs2422345 |
| rs2364482 | rs2373115 | rs2384034 | rs2392929 | rs2399510 | rs2410205 | rs2416528 | rs2422377 |
| rs2364484 | rs2373124 | rs2384046 | rs2392971 | rs2399626 | rs241036  | rs2416564 | rs2422442 |
| rs2364485 | rs2373353 | rs2384054 | rs2393455 | rs239980  | rs2410616 | rs2416699 | rs2422468 |
| rs2364543 | rs2373459 | rs2384060 | rs2393717 | rs239996  | rs2410767 | rs2416759 | rs242269  |
| rs2364544 | rs2373962 | rs2384319 | rs2393730 | rs2399972 | rs2410948 | rs2416804 | rs2422935 |
| rs2364708 | rs2374155 | rs2384322 | rs2393735 | rs2400171 | rs2411192 | rs2416845 | rs2423082 |
| rs2364717 | rs2374456 | rs2384407 | rs2393775 | rs2400414 | rs2411218 | rs2416898 | rs2423151 |
| rs2364723 | rs237485  | rs238449  | rs2393778 | rs2400509 | rs2411233 | rs2416963 | rs2423279 |
| rs2364754 | rs2374916 | rs2384506 | rs2393780 | rs240051  | rs2411247 | rs2417054 | rs2423294 |
| rs2364921 | rs2375636 | rs2384550 | rs2393791 | rs2400940 | rs2411453 | rs2417125 | rs2423852 |
| rs2364972 | rs2375683 | rs2384575 | rs2393794 | rs2401171 | rs2411822 | rs2417589 | rs2423958 |
| rs236500  | rs2375980 | rs2384933 | rs2393831 | rs2401924 | rs2411884 | rs2417612 | rs2424    |
| rs236523  | rs2375981 | rs2384952 | rs2393843 | rs2402273 | rs2411984 | rs241771  | rs2424248 |
| rs2365286 | rs2376015 | rs2384955 | rs2393923 | rs2402341 | rs2412099 | rs241775  | rs2424399 |
| rs236530  | rs2376263 | rs2385094 | rs2393967 | rs2402446 | rs2412138 | rs2417823 | rs2424590 |
| rs2365376 | rs2376280 | rs238522  | rs2393969 | rs2402857 | rs241215  | rs2417940 | rs2424880 |
| rs2365384 | rs2376468 | rs2385263 | rs2394146 | rs2403221 | rs2412208 | rs2417957 | rs2424908 |
| rs2365389 | rs2376549 | rs2385394 | rs2394186 | rs2403254 | rs2412544 | rs2417966 | rs2424952 |
| rs236539  | rs2376584 | rs2385395 | rs2394250 | rs2403274 | rs2412587 | rs2417998 | rs2424961 |
| rs236541  | rs2376585 | rs238544  | rs2394392 | rs2403907 | rs2412608 | rs241809  | rs2424995 |
| rs236570  | rs2376600 | rs2385450 | rs2394982 | rs2404324 | rs2412653 | rs241812  | rs2425020 |
| rs2365715 | rs2376999 | rs2386584 | rs2395022 | rs2404340 | rs2412710 | rs2418130 | rs2425024 |
| rs2365726 | rs2377058 | rs2386886 | rs2395029 | rs2404602 | rs2412771 | rs2418135 | rs2425025 |
| rs2365731 | rs237706  | rs2387280 | rs2395045 | rs2404715 | rs2412776 | rs2418568 | rs2425026 |
| rs2365763 | rs237727  | rs2387397 | rs2395128 | rs2405522 | rs2412970 | rs241890  | rs2425044 |
| rs236586  | rs2377339 | rs238763  | rs2395141 | rs2405942 | rs2412971 | rs2419075 | rs2425048 |
| rs236597  | rs237743  | rs2388148 | rs2395148 | rs240619  | rs2412972 | rs2419313 | rs2425051 |
| rs2366264 | rs2377585 | rs2388298 | rs2395158 | rs2406253 | rs2412973 | rs2419407 | rs2425068 |
| rs236660  | rs2378017 | rs2388334 | rs2395163 | rs2406255 | rs2412974 | rs2419605 | rs2425070 |
| rs2366643 | rs2378078 | rs2388594 | rs2395179 | rs2406256 | rs2412975 | rs2419607 | rs2425143 |
| rs2366858 | rs2378253 | rs2388639 | rs2395185 | rs2406916 | rs2413052 | rs2419626 | rs2425156 |
| rs2366907 | rs2378255 | rs2388669 | rs2395191 | rs240702  | rs2413143 | rs2419835 | rs2425157 |
| rs2366929 | rs2378280 | rs2388714 | rs2395192 | rs2407064 | rs2413151 | rs2419903 | rs2425161 |
| rs2366964 | rs2378331 | rs2388840 | rs2395201 | rs240707  | rs2413323 | rs242016  | rs2425163 |
| rs236710  | rs2378518 | rs2388854 | rs2395209 | rs2407513 | rs2413399 | rs2420178 | rs2425192 |
| rs2367177 | rs2378662 | rs238896  | rs2395258 | rs240764  | rs2413450 | rs2420371 | rs2425224 |
| rs2367277 | rs2378715 | rs2389016 | rs2395340 | rs240769  | rs2413493 | rs2420477 | rs2425241 |
| rs2367724 | rs2378824 | rs238910  | rs2395400 | rs2407746 | rs2413583 | rs2420551 | rs2425256 |
| rs2367970 | rs2378870 | rs238913  | rs2395607 | rs240788  | rs2413590 | rs2420915 | rs242557  |
| rs2368178 | rs2378873 | rs238914  | rs2395617 | rs2408014 | rs2413631 | rs2420946 | rs242559  |
| rs2368196 | rs2379120 | rs238925  | rs2395622 | rs2408058 | rs2413685 | rs2421016 | rs242562  |
| rs2368577 | rs2379829 | rs2389499 | rs2395642 | rs2408111 | rs2413983 | rs2421028 | rs2425670 |
| rs2368831 | rs238027  | rs2389606 | rs2395655 | rs240817  | rs2413994 | rs242105  | rs2425731 |
| rs236907  | rs2380274 | rs2389631 | rs2395668 | rs2408175 | rs2414016 | rs2421200 | rs2425752 |

|             |           |           |           |           |           |           |           |
|-------------|-----------|-----------|-----------|-----------|-----------|-----------|-----------|
| rs2425819   | rs2432236 | rs2441380 | rs2452000 | rs2461286 | rs2469226 | rs2477674 | rs2487294 |
| rs2425840   | rs2432539 | rs2442599 | rs2452141 | rs2461333 | rs2469434 | rs2477686 | rs2487628 |
| rs2425847   | rs2433025 | rs2442604 | rs2452170 | rs2461475 | rs246973  | rs2477826 | rs2487818 |
| rs2425848   | rs2433143 | rs2442730 | rs2452877 | rs246179  | rs246978  | rs2477923 | rs2487928 |
| rs2425856   | rs243332  | rs2442735 | rs2453042 | rs246180  | rs2469903 | rs2478208 | rs2488002 |
| rs2425857   | rs2433414 | rs2442749 | rs2453051 | rs246185  | rs2469933 | rs247826  | rs2488010 |
| rs2426132   | rs2433610 | rs2442776 | rs2453237 | rs246192  | rs2469991 | rs247827  | rs2488075 |
| rs2426338   | rs2433611 | rs244293  | rs2453441 | rs246196  | rs2469997 | rs2478281 | rs248831  |
| rs2426439   | rs2433634 | rs2443064 | rs2453533 | rs2462015 | rs2470102 | rs2478286 | rs2488389 |
| rs2427308   | rs2433733 | rs2443065 | rs2453580 | rs2462017 | rs2470180 | rs2478295 | rs2488393 |
| rs2427345   | rs2434264 | rs2443066 | rs2453583 | rs246234  | rs2470397 | rs247830  | rs2488397 |
| rs2427394   | rs2434467 | rs2443718 | rs2453584 | rs246242  | rs2470548 | rs247831  | rs2488398 |
| rs2427538   | rs2434529 | rs2443723 | rs2453849 | rs2462506 | rs2470581 | rs247833  | rs2488401 |
| rs2427539   | rs2434582 | rs2443724 | rs2453868 | rs2462661 | rs2470893 | rs2478333 | rs2488786 |
| rs2427667   | rs2434612 | rs244415  | rs2454138 | rs2463097 | rs2470961 | rs2478539 | rs2488808 |
| rs2427852   | rs2434672 | rs244418  | rs2454205 | rs2463523 | rs2470966 | rs2478543 | rs2488813 |
| rs2427964   | rs2434708 | rs244420  | rs2454206 | rs2463652 | rs2471032 | rs247870  | rs248912  |
| rs2428      | rs2434885 | rs244423  | rs2454352 | rs2463822 | rs2471711 | rs2478777 | rs2489201 |
| rs2428247   | rs243505  | rs2444770 | rs2454478 | rs246395  | rs2471738 | rs2478981 | rs2489245 |
| rs24283     | rs2435200 | rs2445284 | rs2454703 | rs2464195 | rs2471739 | rs247910  | rs2489279 |
| rs2428362   | rs2435201 | rs2445575 | rs2454846 | rs2464469 | rs2471960 | rs2479106 | rs2489623 |
| rs2428362â? | rs2435207 | rs2445584 | rs2454897 | rs2464522 | rs2472297 | rs247911  | rs2489629 |
|             | rs2435210 | rs2445610 | rs2455069 | rs246478  | rs2472386 | rs247929  | rs2489940 |
| rs2428494   | rs2435307 | rs2445704 | rs2455101 | rs2465037 | rs2472493 | rs2479409 | rs2490128 |
| rs2428507   | rs2435349 | rs2445752 | rs2455425 | rs2465281 | rs2472494 | rs2479548 | rs2490272 |
| rs2428548   | rs2435355 | rs2445762 | rs2455561 | rs2465283 | rs2472496 | rs2479717 | rs249038  |
| rs2428549   | rs2435357 | rs2445922 | rs2455569 | rs2465404 | rs2472591 | rs2479724 | rs2490391 |
| rs2428939   | rs2435373 | rs2445949 | rs2455793 | rs2465410 | rs2472610 | rs247975  | rs2490395 |
| rs242912    | rs2435378 | rs2446065 | rs2455799 | rs246562  | rs2472640 | rs2479868 | rs2491105 |
| rs242934    | rs2435907 | rs2446066 | rs2455821 | rs2465936 | rs2472649 | rs2479958 | rs2491124 |
| rs242942    | rs2436396 | rs2446422 | rs2455848 | rs246600  | rs2472670 | rs2480171 | rs2491244 |
| rs242947    | rs2436508 | rs244656  | rs2456015 | rs2466029 | rs2472682 | rs2480712 | rs2491251 |
| rs242949    | rs2436760 | rs244672  | rs2456020 | rs2466035 | rs2473140 | rs2480930 | rs2491383 |
| rs2429511   | rs2436845 | rs244676  | rs2456162 | rs2466074 | rs2473181 | rs2480952 | rs2491392 |
| rs2429657   | rs2436962 | rs244688  | rs2456181 | rs2466075 | rs2473234 | rs2481061 | rs2491441 |
| rs242997    | rs2437145 | rs244689  | rs2456449 | rs2466076 | rs2473248 | rs2481065 | rs2491646 |
| rs243018    | rs2437258 | rs244690  | rs2456530 | rs2466077 | rs2473290 | rs248160  | rs2492286 |
| rs243019    | rs2437689 | rs2447091 | rs2456722 | rs2466103 | rs2473446 | rs2481665 | rs2492301 |
| rs243021    | rs2437780 | rs2447094 | rs2456827 | rs2466120 | rs247345  | rs2482506 | rs2492863 |
| rs243024    | rs2437812 | rs2447097 | rs2456973 | rs2466212 | rs2473808 | rs2482508 | rs2492906 |
| rs2430307   | rs2437819 | rs2447098 | rs2457192 | rs246628  | rs247420  | rs248252  | rs249293  |
| rs2430356   | rs2437927 | rs244711  | rs2457333 | rs2466446 | rs2474283 | rs248276  | rs2493134 |
| rs2430386   | rs2438086 | rs2447198 | rs2457480 | rs2466572 | rs2474370 | rs2482819 | rs2493135 |
| rs243063    | rs2438109 | rs244723  | rs2457574 | rs2466920 | rs2474470 | rs2482826 | rs2493136 |
| rs243066    | rs2438150 | rs244760  | rs2457660 | rs2467099 | rs2474619 | rs2482963 | rs2493137 |
| rs2430689   | rs2438197 | rs2447828 | rs245768  | rs2467109 | rs247463  | rs2483280 | rs2493141 |
| rs2430690   | rs2438206 | rs2447832 | rs245769  | rs2467146 | rs2474720 | rs2483509 | rs2493151 |
| rs243070    | rs2438321 | rs2447853 | rs245774  | rs246723  | rs2474724 | rs248381  | rs2493291 |
| rs243072    | rs243866  | rs2448    | rs245775  | rs246776  | rs2474937 | rs248386  | rs2493292 |
| rs243074    | rs2439042 | rs2448241 | rs2458167 | rs2467853 | rs247520  | rs2484294 | rs2493296 |
| rs243077    | rs2439202 | rs2448490 | rs2458280 | rs2467992 | rs247546  | rs2484314 | rs2493298 |
| rs243088    | rs2439302 | rs2449511 | rs2458370 | rs2468024 | rs2475553 | rs2485371 | rs2493340 |
| rs2430926   | rs2439355 | rs2449611 | rs2458413 | rs246814  | rs247556  | rs2485376 | rs2493394 |
| rs2431023   | rs2439423 | rs2450083 | rs2458493 | rs2468184 | rs2475787 | rs2485630 | rs2493661 |
| rs2431098   | rs2439649 | rs2450115 | rs2458604 | rs2468186 | rs2476023 | rs2485713 | rs249394  |
| rs2431108   | rs2439737 | rs2450128 | rs2459732 | rs2468307 | rs247616  | rs2485953 | rs2494015 |
| rs2431112   | rs2439823 | rs2450333 | rs2460    | rs2468506 | rs247617  | rs2486012 | rs2494097 |
| rs2431115   | rs2439843 | rs2450444 | rs2460186 | rs2468511 | rs2476322 | rs2486272 | rs2494114 |
| rs2431320   | rs2439958 | rs2450445 | rs2460187 | rs2468531 | rs2476601 | rs2486288 | rs2494184 |
| rs2431696   | rs2439998 | rs2450448 | rs2460382 | rs2468532 | rs2476729 | rs2486294 | rs2494196 |
| rs2431697   | rs2440012 | rs245051  | rs2460448 | rs2468789 | rs2476733 | rs248653  | rs2494250 |
| rs2431752   | rs2440154 | rs2451258 | rs2460449 | rs2468832 | rs2477059 | rs2486695 | rs249429  |
| rs2431830   | rs2440164 | rs2451279 | rs2460451 | rs2468947 | rs2477425 | rs248682  | rs2494429 |
| rs243192    | rs2440165 | rs2451500 | rs2460457 | rs2468964 | rs2477432 | rs248686  | rs2494663 |
| rs2432132   | rs244017  | rs2451729 | rs2460488 | rs2469082 | rs2477467 | rs2486950 | rs2494668 |
| rs2432142   | rs2440907 | rs2451948 | rs246073  | rs2469096 | rs247749  | rs2487032 | rs2494747 |
| rs2432195   | rs2441026 | rs2451951 | rs2460882 | rs2469184 | rs2477664 | rs2487048 | rs2494748 |

|           |           |           |           |           |           |            |           |
|-----------|-----------|-----------|-----------|-----------|-----------|------------|-----------|
| rs2494938 | rs2504235 | rs2512376 | rs2518022 | rs2523802 | rs2529218 | rs2540513  | rs2548280 |
| rs2494979 | rs2504236 | rs2512412 | rs2518049 | rs2523809 | rs2529369 | rs2540641  | rs2548496 |
| rs2494997 | rs2504671 | rs2512519 | rs2518134 | rs2523815 | rs2529411 | rs2540647  | rs2548498 |
| rs2495239 | rs2504716 | rs251253  | rs2518136 | rs2523822 | rs2529471 | rs2540766  | rs2548499 |
| rs2495477 | rs2504776 | rs2513369 | rs2518142 | rs2523864 | rs2529703 | rs2540917  | rs2548879 |
| rs2495504 | rs2504791 | rs2513505 | rs2518489 | rs2523933 | rs252991  | rs2540945  | rs2548992 |
| rs2495707 | rs2504797 | rs2513877 | rs2518491 | rs2523946 | rs2530225 | rs2540948  | rs2548998 |
| rs2495739 | rs2505083 | rs251398  | rs2518564 | rs2523961 | rs2530241 | rs2540949  | rs2549722 |
| rs2496022 | rs2505084 | rs2513987 | rs2518683 | rs2523978 | rs2530394 | rs2540950  | rs2549732 |
| rs2496024 | rs250517  | rs2513993 | rs2518907 | rs2523987 | rs2530459 | rs2540951  | rs2549794 |
| rs249612  | rs250518  | rs2514022 | rs2519093 | rs2523989 | rs2530482 | rs2540953  | rs2549803 |
| rs2496411 | rs2505292 | rs2514032 | rs2519673 | rs2523990 | rs2530660 | rs2541138  | rs2550298 |
| rs2496482 | rs2505447 | rs2514214 | rs2519796 | rs2524035 | rs2531360 | rs2541312  | rs2550374 |
| rs2496632 | rs2505507 | rs2514218 | rs2519961 | rs2524054 | rs2531875 | rs2541381  | rs255049  |
| rs2496689 | rs2505535 | rs2514226 | rs2520096 | rs2524067 | rs253197  | rs2541638  | rs255052  |
| rs2496694 | rs2505994 | rs2514594 | rs2520099 | rs2524079 | rs2531992 | rs2541639  | rs255053  |
| rs249677  | rs2505998 | rs251464  | rs2520258 | rs2524081 | rs2531995 | rs2541640  | rs255054  |
| rs249681  | rs2506    | rs251466  | rs2520402 | rs2524082 | rs2532004 | rs2541677  | rs255056  |
| rs2497296 | rs2506028 | rs251468  | rs2520698 | rs2524084 | rs2532111 | rs2542148  | rs2551181 |
| rs2497304 | rs2506089 | rs2514805 | rs2521230 | rs2524095 | rs2532240 | rs2542151  | rs2551347 |
| rs2497306 | rs2506142 | rs2514841 | rs2521269 | rs2524105 | rs2532253 | rs2542170  | rs2551641 |
| rs2497318 | rs2506149 | rs2514882 | rs252128  | rs2524108 | rs2532263 | rs2542573  | rs2551769 |
| rs249733  | rs2506889 | rs2514923 | rs2521295 | rs2524139 | rs2532345 | rs2542582  | rs2551778 |
| rs2497414 | rs2506942 | rs2515055 | rs2521349 | rs2524142 | rs2532349 | rs2542615  | rs2551802 |
| rs249756  | rs250727  | rs251526  | rs2521501 | rs2524143 | rs2532353 | rs2542673  | rs2551980 |
| rs249767  | rs2507804 | rs2515616 | rs2521572 | rs2524163 | rs2532386 | rs2542710  | rs255292  |
| rs2497833 | rs2507838 | rs2515629 | rs2521602 | rs2524204 | rs2532389 | rs2543029  | rs255299  |
| rs2497911 | rs2507948 | rs2515919 | rs2521765 | rs2524236 | rs2532497 | rs2543154  | rs255303  |
| rs2497938 | rs2507968 | rs2516049 | rs252195  | rs2524277 | rs2532655 | rs2543489  | rs2553100 |
| rs2498020 | rs2507971 | rs2516392 | rs2522051 | rs2524280 | rs2532718 | rs2543513  | rs2553772 |
| rs2498323 | rs2507978 | rs2516399 | rs2522056 | rs2524292 | rs2532972 | rs254370   | rs2553773 |
| rs2498381 | rs2507989 | rs2516448 | rs2522061 | rs2524299 | rs2533148 | rs2544026  | rs2553974 |
| rs2498527 | rs2507999 | rs2516466 | rs2522184 | rs252491  | rs2533200 | rs2544027  | rs2554835 |
| rs2498589 | rs2508362 | rs2516470 | rs2522188 | rs2524982 | rs2533291 | rs254415   | rs2555019 |
| rs2498786 | rs2508490 | rs2516471 | rs2522490 | rs2525098 | rs2533449 | rs2544221  | rs2555502 |
| rs2498796 | rs2508655 | rs2516482 | rs2522545 | rs2525565 | rs253412  | rs2544390  | rs2555515 |
| rs2499468 | rs2508713 | rs2516513 | rs2522825 | rs2525570 | rs253440  | rs2544448  | rs2556094 |
| rs2499472 | rs2509049 | rs2516568 | rs2522831 | rs2525776 | rs253443  | rs2544536  | rs2556097 |
| rs2499760 | rs2509353 | rs2516599 | rs2523393 | rs2525795 | rs2534596 | rs2544654  | rs2556375 |
| rs2499797 | rs25095   | rs2516667 | rs2523443 | rs2526099 | rs2534674 | rs2544673  | rs2556378 |
| rs2500220 | rs250959  | rs2516686 | rs2523496 | rs2526101 | rs2534681 | rs2544676  | rs255694  |
| rs2500406 | rs2509805 | rs2516703 | rs2523501 | rs2526358 | rs2535296 | rs2544681  | rs255773  |
| rs2500430 | rs2509814 | rs2516726 | rs2523515 | rs2526359 | rs2535392 | rs2544920  | rs255774  |
| rs2500535 | rs2509851 | rs2516739 | rs2523517 | rs2526376 | rs2535393 | rs2544559  | rs2558096 |
| rs250100  | rs2509902 | rs2516839 | rs2523548 | rs2526377 | rs2535627 | rs2544560  | rs255877  |
| rs2501285 | rs2509961 | rs2516928 | rs2523552 | rs2526385 | rs2535629 | rs2544562  | rs255892  |
| rs2501309 | rs2509963 | rs2517086 | rs2523557 | rs2526388 | rs2535633 | rs2544563  | rs255896  |
| rs2501324 | rs2509967 | rs251733  | rs2523562 | rs2526390 | rs2535918 | rs2544570  | rs2559509 |
| rs2501426 | rs2509973 | rs2517388 | rs2523570 | rs2526398 | rs2536149 | rs25445795 | rs2559658 |
| rs2501571 | rs2509985 | rs2517473 | rs2523573 | rs2526399 | rs2536150 | rs25445797 | rs2559728 |
| rs2501574 | rs2510044 | rs2517481 | rs2523578 | rs2526622 | rs2536172 | rs25445798 | rs2559856 |
| rs2502136 | rs2510078 | rs2517510 | rs2523587 | rs2526626 | rs2536189 | rs25458    | rs2560787 |
| rs2502815 | rs2510344 | rs2517521 | rs2523589 | rs2526639 | rs2536195 | rs2545801  | rs2561477 |
| rs2502994 | rs2510375 | rs2517532 | rs2523590 | rs2526882 | rs2537584 | rs2546057  | rs2561530 |
| rs2502995 | rs2510376 | rs2517582 | rs2523591 | rs2526886 | rs2537594 | rs2546095  | rs2561566 |
| rs250302  | rs2510396 | rs2517601 | rs2523607 | rs2526932 | rs2537854 | rs2546890  | rs2561758 |
| rs250303  | rs2510405 | rs2517602 | rs2523608 | rs2526952 | rs2538054 | rs2546976  | rs2562152 |
| rs250308  | rs2510897 | rs2517611 | rs2523614 | rs2527042 | rs2538470 | rs2546979  | rs2562181 |
| rs2503099 | rs2510902 | rs2517622 | rs2523616 | rs252716  | rs2539679 | rs2546984  | rs2562456 |
| rs2503100 | rs2511158 | rs2517664 | rs2523625 | rs2527166 | rs2539692 | rs2546986  | rs2562754 |
| rs2503111 | rs2511162 | rs2517678 | rs2523650 | rs252746  | rs2539706 | rs2547231  | rs2562781 |
| rs2503715 | rs2511241 | rs2517690 | rs2523673 | rs252749  | rs2540028 | rs2547274  | rs2563332 |
| rs2503775 | rs251130  | rs2517713 | rs2523677 | rs2527617 | rs2540034 | rs2547497  | rs256377  |
| rs2503776 | rs2511504 | rs2517720 | rs2523696 | rs2528531 | rs254023  | rs254779   | rs256438  |
| rs2504063 | rs2511713 | rs2517873 | rs2523710 | rs2528787 | rs254024  | rs254781   | rs25645   |
| rs2504069 | rs2511847 | rs2517887 | rs2523719 | rs2529069 | rs2540431 | rs2547950  | rs2564906 |
| rs2504101 | rs251216  | rs2517959 | rs2523722 | rs2529090 | rs2540435 | rs2548257  | rs2564921 |

|           |           |           |           |           |           |           |            |
|-----------|-----------|-----------|-----------|-----------|-----------|-----------|------------|
| rs2564923 | rs2576159 | rs2584350 | rs2593855 | rs2601007 | rs2608895 | rs2618566 | rs263017   |
| rs2564942 | rs2576221 | rs2584351 | rs2594136 | rs2601191 | rs2608913 | rs2618567 | rs2630445  |
| rs2565059 | rs2576452 | rs2584462 | rs2594220 | rs2601701 | rs2608953 | rs2618568 | rs2630445a |
| rs2565164 | rs2576576 | rs2584597 | rs2594495 | rs2601777 | rs2609255 | rs2618601 | rs2630709  |
| rs2565688 | rs257677  | rs2584625 | rs2594714 | rs2601791 | rs2609279 | rs2618647 | rs263071   |
| rs2565722 | rs2576835 | rs25849   | rs2594716 | rs2601825 | rs2609280 | rs261909  | rs2630761  |
| rs256602  | rs2576975 | rs258494  | rs2594836 | rs2602431 | rs2609352 | rs261910  | rs2630765  |
| rs2566752 | rs2577134 | rs2585    | rs2594867 | rs2602556 | rs260995  | rs261940  | rs2630788  |
| rs2566755 | rs2577326 | rs2585061 | rs2594948 | rs2602680 | rs2610528 | rs261967  | rs2631043  |
| rs2566774 | rs2577531 | rs2585073 | rs2594950 | rs2602813 | rs2610701 | rs2619976 | rs2631360  |
| rs2567241 | rs2577595 | rs2585398 | rs2594992 | rs2602856 | rs2610974 | rs2620709 | rs2631367  |
| rs25673   | rs2577831 | rs2585442 | rs2594994 | rs2603151 | rs2610990 | rs2621322 | rs263137   |
| rs256741  | rs2577947 | rs2585447 | rs2595004 | rs2603192 | rs2611206 | rs2621363 | rs263156   |
| rs2567614 | rs257832  | rs2585668 | rs2595041 | rs2603458 | rs2611215 | rs2621416 | rs2631669  |
| rs256837  | rs2578377 | rs2585810 | rs2595104 | rs2603807 | rs2611742 | rs2622167 | rs2631676  |
| rs2568464 | rs2578384 | rs2585817 | rs2595255 | rs260399  | rs2611774 | rs2622237 | rs2631738  |
| rs2568494 | rs2578652 | rs2585897 | rs2595389 | rs2604217 | rs261179  | rs2622274 | rs263179   |
| rs2568565 | rs2578673 | rs2586222 | rs2595507 | rs2604263 | rs2612581 | rs2622276 | rs2631864  |
| rs2568569 | rs2579040 | rs2586392 | rs2595508 | rs2604264 | rs2612585 | rs2622590 | rs2632516  |
| rs2568928 | rs2579136 | rs2586457 | rs2595583 | rs2604268 | rs2612614 | rs2622608 | rs2633310  |
| rs2568955 | rs2579162 | rs2586786 | rs2595644 | rs2604271 | rs2612765 | rs2622629 | rs2633311  |
| rs2568956 | rs2579500 | rs2586886 | rs2596449 | rs26046   | rs261290  | rs2622873 | rs2633725  |
| rs2568958 | rs2579503 | rs2587070 | rs2596464 | rs2604861 | rs261291  | rs2623079 | rs2634047  |
| rs256903  | rs2579506 | rs2587410 | rs2596465 | rs2604877 | rs2613129 | rs2623168 | rs2634074  |
| rs256904  | rs2579519 | rs2587505 | rs2596466 | rs2604894 | rs2613197 | rs26232   | rs2634447  |
| rs2569075 | rs2579753 | rs2587507 | rs2596472 | rs2604909 | rs261332  | rs26233   | rs2634675  |
| rs2569191 | rs2579762 | rs258753  | rs2596473 | rs2604911 | rs261334  | rs2623325 | rs2635119  |
| rs2569400 | rs2579989 | rs2587534 | rs2596492 | rs2604988 | rs261336  | rs2623365 | rs263527   |
| rs2569444 | rs258     | rs258756  | rs2596493 | rs260508  | rs261342  | rs262338  | rs2635383  |
| rs2569454 | rs2580009 | rs258796  | rs2596500 | rs2605082 | rs2613458 | rs26234   | rs2635727  |
| rs2569491 | rs2580160 | rs25884   | rs2596505 | rs2605088 | rs2613496 | rs2624021 | rs263575   |
| rs2569702 | rs2580315 | rs2588704 | rs2596542 | rs2605097 | rs2613498 | rs2624816 | rs263598   |
| rs2569703 | rs2580764 | rs2588785 | rs2596544 | rs2605098 | rs2613499 | rs2624818 | rs2636060  |
| rs2569842 | rs2580779 | rs2588791 | rs2596565 | rs2605100 | rs2613500 | rs2624825 | rs263645   |
| rs2569882 | rs2580816 | rs2588809 | rs2596820 | rs2605101 | rs2613503 | rs2624834 | rs2636649  |
| rs2569993 | rs2580820 | rs258888  | rs2596902 | rs2605110 | rs2613505 | rs2624839 | rs2636699  |
| rs257009  | rs2580821 | rs2588959 | rs2597193 | rs2605134 | rs2613522 | rs2624842 | rs2637030  |
| rs2570495 | rs2581260 | rs2588978 | rs2597305 | rs2605281 | rs2613765 | rs2624847 | rs2637125  |
| rs2570497 | rs2581348 | rs2589113 | rs2597513 | rs2605490 | rs2614258 | rs2624881 | rs2637254  |
| rs2570541 | rs2581357 | rs2589138 | rs2597979 | rs2605603 | rs2614266 | rs2625004 | rs2637294  |
| rs257056  | rs2581468 | rs2589161 | rs2598095 | rs2606146 | rs2614463 | rs26251   | rs2637317  |
| rs257063  | rs2581624 | rs2589341 | rs25981   | rs2606227 | rs2614471 | rs2625312 | rs2637678  |
| rs2571249 | rs2581761 | rs258951  | rs2598107 | rs2606228 | rs2614546 | rs2625322 | rs263771   |
| rs2571391 | rs2581787 | rs2589561 | rs2598293 | rs260643  | rs2614847 | rs2625529 | rs2637869  |
| rs2571392 | rs2581817 | rs2589850 | rs259842  | rs2606432 | rs2614993 | rs2625672 | rs2638314  |
| rs2571445 | rs2581820 | rs259035  | rs2598420 | rs2606558 | rs2615061 | rs2625972 | rs2638315  |
| rs2571571 | rs2581825 | rs2590438 | rs259919  | rs260658  | rs2615333 | rs2625973 | rs2638953  |
| rs2571573 | rs2581828 | rs2590440 | rs2599459 | rs26067   | rs2615510 | rs2627019 | rs2639099  |
| rs2572207 | rs2582300 | rs2590466 | rs2599469 | rs2606725 | rs2616132 | rs2627237 | rs2639935  |
| rs2572353 | rs2582405 | rs2590499 | rs2599510 | rs2606736 | rs2616143 | rs2627308 | rs2639953  |
| rs2572431 | rs2582974 | rs2590816 | rs259958  | rs260692  | rs2616534 | rs2627646 | rs2639990  |
| rs2572440 | rs258317  | rs2590838 | rs259960  | rs2607006 | rs2616673 | rs2627761 | rs264      |
| rs2573081 | rs258321  | rs2590990 | rs259964  | rs26074   | rs2616830 | rs262823  | rs2640017  |
| rs257309  | rs258322  | rs2590996 | rs259967  | rs2607426 | rs2617170 | rs2628317 | rs264038   |
| rs2573210 | rs2583223 | rs2591125 | rs2599711 | rs2607505 | rs2617178 | rs262890  | rs2640564  |
| rs2573566 | rs258324  | rs2591388 | rs2599713 | rs2607748 | rs2617439 | rs2629046 | rs2640717  |
| rs2573625 | rs2583410 | rs2591392 | rs259981  | rs2607903 | rs2617515 | rs2629047 | rs2641224  |
| rs2573652 | rs2583839 | rs2591453 | rs259983  | rs2607948 | rs2617802 | rs2629103 | rs2641348  |
| rs257377  | rs2583921 | rs2591576 | rs259990  | rs2608029 | rs2618039 | rs2629540 | rs2641438  |
| rs2574727 | rs2583934 | rs2592199 | rs2600196 | rs2608052 | rs2618070 | rs2629542 | rs2642192  |
| rs2574974 | rs2583938 | rs2592831 | rs260020  | rs2608073 | rs2618152 | rs262956  | rs2642365  |
| rs2575286 | rs2583939 | rs2592902 | rs2600223 | rs2608291 | rs2618444 | rs2629665 | rs2642438  |
| rs2575570 | rs2583948 | rs2593014 | rs2600605 | rs2608604 | rs2618451 | rs2629745 | rs2642442  |
| rs2575725 | rs2583949 | rs2593017 | rs2600667 | rs2608625 | rs2618476 | rs262986  | rs2642587  |
| rs2575876 | rs258415  | rs2593235 | rs26008   | rs2608639 | rs2618515 | rs2629881 | rs2642588  |
| rs2576035 | rs2584240 | rs2593487 | rs2600959 | rs2608652 | rs2618516 | rs263001  | rs2642608  |
| rs2576135 | rs2584242 | rs2593704 | rs2601006 | rs2608894 | rs2618521 | rs263013  | rs264299   |

|           |           |           |           |           |           |           |           |
|-----------|-----------|-----------|-----------|-----------|-----------|-----------|-----------|
| rs26431   | rs2651369 | rs2661794 | rs2673803 | rs2683687 | rs2695237 | rs2704050 | rs2712341 |
| rs2643672 | rs2651804 | rs2661796 | rs2673908 | rs2683696 | rs2695294 | rs27041   | rs2712381 |
| rs2643826 | rs2651823 | rs2661797 | rs2674078 | rs2684249 | rs2695458 | rs270417  | rs2712412 |
| rs2644111 | rs2651899 | rs2661798 | rs2675149 | rs26845   | rs2695478 | rs270418  | rs2712417 |
| rs2644128 | rs2652110 | rs2662368 | rs267517  | rs2684777 | rs2696187 | rs2704188 | rs2712667 |
| rs2644135 | rs2652430 | rs2662390 | rs2675336 | rs2684788 | rs2696264 | rs27044   | rs27130   |
| rs26442   | rs2652434 | rs2662411 | rs2675345 | rs2685056 | rs2696457 | rs2704589 | rs2713206 |
| rs26443   | rs2652452 | rs2663052 | rs267539  | rs2685130 | rs2696466 | rs2705366 | rs2713536 |
| rs2644307 | rs2652460 | rs2663054 | rs267540  | rs2685131 | rs2696497 | rs2705608 | rs2713557 |
| rs2644312 | rs26528   | rs2663124 | rs267543  | rs2685416 | rs2696500 | rs2705616 | rs2713573 |
| rs264527  | rs2652806 | rs2663339 | rs2675568 | rs2685799 | rs2696524 | rs2705619 | rs2713579 |
| rs2645289 | rs2652813 | rs2663842 | rs2675611 | rs2686335 | rs2696532 | rs2705789 | rs2713602 |
| rs2645294 | rs2652822 | rs2663924 | rs2675638 | rs2686544 | rs2696557 | rs270601  | rs2713604 |
| rs2645302 | rs2652834 | rs2664035 | rs2675662 | rs2686555 | rs2696579 | rs270602  | rs2713650 |
| rs2645430 | rs2653343 | rs2664170 | rs2675669 | rs2686600 | rs2696589 | rs2706110 | rs2713933 |
| rs2645453 | rs2653344 | rs266428  | rs267567  | rs2686631 | rs2696625 | rs2706345 | rs2713936 |
| rs2645463 | rs2653349 | rs2664299 | rs2675952 | rs26868   | rs2696658 | rs270636  | rs2713939 |
| rs2645466 | rs2653559 | rs2664521 | rs2675956 | rs2686802 | rs2696668 | rs2706362 | rs2714338 |
| rs2645477 | rs2653772 | rs2664726 | rs267689  | rs2686876 | rs2696685 | rs2706505 | rs2714486 |
| rs2645492 | rs2653889 | rs2665103 | rs2677102 | rs268717  | rs2696694 | rs2706702 | rs2714658 |
| rs2645694 | rs2654189 | rs2665397 | rs2677108 | rs2687201 | rs269696  | rs2706710 | rs2715026 |
| rs2645775 | rs26543   | rs2665405 | rs267733  | rs2687202 | rs269704  | rs2706762 | rs2715093 |
| rs2645979 | rs2654670 | rs2665558 | rs267734  | rs2687507 | rs2697329 | rs2706770 | rs2715135 |
| rs2646421 | rs2654980 | rs2665668 | rs267738  | rs268771  | rs269771  | rs2706785 | rs2715147 |
| rs2646424 | rs2655268 | rs2665838 | rs2677770 | rs2687729 | rs2697806 | rs270689  | rs2715157 |
| rs2646425 | rs2655327 | rs2665962 | rs2678204 | rs2687812 | rs269790  | rs270694  | rs2715274 |
| rs2647003 | rs2655438 | rs2666218 | rs2678210 | rs268794  | rs269791  | rs2707238 | rs2715275 |
| rs2647006 | rs265548  | rs2666504 | rs2678379 | rs2687950 | rs2697920 | rs2707450 | rs2715423 |
| rs2647012 | rs2656052 | rs2666747 | rs2678670 | rs2688194 | rs2697963 | rs2707466 | rs2716036 |
| rs2647025 | rs2656065 | rs2667004 | rs2678892 | rs2688220 | rs2698737 | rs2707518 | rs271620  |
| rs2647044 | rs2656523 | rs2667011 | rs2678897 | rs2688325 | rs2699805 | rs2708081 | rs2716214 |
| rs2647045 | rs2656918 | rs266717  | rs2678904 | rs2688326 | rs269985  | rs2708146 | rs271637  |
| rs2647051 | rs265721  | rs2667360 | rs2678915 | rs2688412 | rs2699869 | rs2708377 | rs2716579 |
| rs2647062 | rs2657283 | rs2667376 | rs2678949 | rs2688608 | rs2699887 | rs2708597 | rs2716613 |
| rs2647074 | rs2657375 | rs2667477 | rs267939  | rs2688619 | rs2699905 | rs2708632 | rs271679  |
| rs2647116 | rs26578   | rs2667648 | rs2679531 | rs2688708 | rs2699907 | rs2708914 | rs271681  |
| rs2647187 | rs2657879 | rs2667684 | rs2679617 | rs268891  | rs2700010 | rs2708916 | rs271695  |
| rs2647234 | rs2657880 | rs2667761 | rs267963  | rs2689216 | rs2700068 | rs2708977 | rs2717018 |
| rs2647249 | rs26579   | rs2668196 | rs2679745 | rs2689282 | rs2700201 | rs2709062 | rs2717033 |
| rs2647256 | rs2657910 | rs2668244 | rs2679894 | rs2690034 | rs2700297 | rs2709505 | rs2717036 |
| rs2647257 | rs2658689 | rs266849  | rs268     | rs2690083 | rs27003   | rs2709646 | rs2717041 |
| rs2647261 | rs2658746 | rs2668537 | rs2680340 | rs269051  | rs2700892 | rs2709821 | rs2717043 |
| rs2647263 | rs2658797 | rs2668602 | rs2680344 | rs2690837 | rs2700902 | rs2709865 | rs2717046 |
| rs2647286 | rs2658799 | rs2668637 | rs268067  | rs2690935 | rs2700937 | rs2710119 | rs2717063 |
| rs2647462 | rs2659009 | rs266868  | rs2680706 | rs2690937 | rs2700938 | rs2710251 | rs2717071 |
| rs264758  | rs2659051 | rs2668680 | rs2680707 | rs2691217 | rs2700983 | rs2710323 | rs2717329 |
| rs2647873 | rs2659052 | rs2668767 | rs2680708 | rs2691254 | rs2700987 | rs271043  | rs2717547 |
| rs2647929 | rs2659067 | rs2668776 | rs2681035 | rs2691273 | rs2701110 | rs2710606 | rs2717685 |
| rs2647978 | rs2659124 | rs2669170 | rs268120  | rs2691475 | rs2701184 | rs2710619 | rs2718058 |
| rs2647995 | rs2659187 | rs2669902 | rs2681312 | rs2691586 | rs2701523 | rs2710634 | rs2718146 |
| rs2648721 | rs2659207 | rs2670014 | rs268134  | rs2692219 | rs2701524 | rs2710642 | rs2718277 |
| rs2648725 | rs26595   | rs2670139 | rs2681417 | rs2692519 | rs2701863 | rs2710651 | rs2718717 |
| rs2649044 | rs2659582 | rs2670714 | rs2681424 | rs2692530 | rs2702533 | rs2710691 | rs2718791 |
| rs264923  | rs2659584 | rs2670747 | rs2681472 | rs2692533 | rs2702575 | rs2710804 | rs27190   |
| rs264952  | rs2660241 | rs2670854 | rs2681485 | rs2692685 | rs2702576 | rs2710872 | rs2719209 |
| rs26496   | rs2660302 | rs2671245 | rs2681492 | rs2692947 | rs2702912 | rs2710889 | rs271936  |
| rs264962  | rs2660304 | rs2671427 | rs2681616 | rs269324  | rs2702945 | rs2710956 | rs2720024 |
| rs2649666 | rs266053  | rs2671692 | rs2681780 | rs2693560 | rs2702968 | rs2711111 | rs2720044 |
| rs2649734 | rs2660566 | rs267190  | rs2682049 | rs2693672 | rs2703129 | rs2711117 | rs2720378 |
| rs264974  | rs266060  | rs2672083 | rs2682051 | rs2693686 | rs27033   | rs2711144 | rs2720429 |
| rs264979  | rs266067  | rs2672092 | rs2682053 | rs2693698 | rs2703479 | rs2711170 | rs2720460 |
| rs2650000 | rs266069  | rs26722   | rs2682204 | rs2694047 | rs2703485 | rs2711977 | rs2720659 |
| rs2650492 | rs2660753 | rs267239  | rs2682302 | rs2694528 | rs2703486 | rs2711981 | rs2721051 |
| rs2650965 | rs2660824 | rs2672852 | rs2682406 | rs2694633 | rs2703593 | rs2712056 | rs2721173 |
| rs2650976 | rs266085  | rs2673085 | rs268263  | rs26949   | rs2703594 | rs2712169 | rs2721195 |
| rs2651205 | rs266095  | rs2673136 | rs2683616 | rs2694917 | rs2703636 | rs2712184 | rs27215   |
| rs2651244 | rs2660971 | rs2673748 | rs2683653 | rs2695234 | rs2703954 | rs2712199 | rs2721796 |

|           |           |           |           |           |           |           |           |
|-----------|-----------|-----------|-----------|-----------|-----------|-----------|-----------|
| rs2721811 | rs2726481 | rs2732708 | rs2737002 | rs2742986 | rs27493   | rs276220  | rs277402  |
| rs2721932 | rs2726491 | rs2732716 | rs2737203 | rs274312  | rs2749418 | rs276226  | rs2774316 |
| rs2721936 | rs2726492 | rs2732730 | rs2737207 | rs27432   | rs274943  | rs2762339 | rs2774430 |
| rs2721938 | rs2726513 | rs2732814 | rs2737212 | rs27434   | rs274945  | rs2762353 | rs2774952 |
| rs2721940 | rs2726518 | rs2732860 | rs2737216 | rs2743461 | rs274947  | rs2762461 | rs27757   |
| rs2721953 | rs2726519 | rs2732861 | rs2737217 | rs2743465 | rs2749534 | rs2762465 | rs2776288 |
| rs2721954 | rs2726528 | rs2732875 | rs2737218 | rs2743467 | rs274966  | rs2762662 | rs2776348 |
| rs2721965 | rs2726548 | rs2732895 | rs2737219 | rs274369  | rs2749732 | rs2762942 | rs2776353 |
| rs27220   | rs2726550 | rs2733201 | rs2737226 | rs27438   | rs2749806 | rs2762943 | rs277727  |
| rs2722012 | rs2726554 | rs2733289 | rs2737229 | rs2744038 | rs2749870 | rs2763041 | rs2777768 |
| rs2722176 | rs2726629 | rs2733310 | rs2737240 | rs2744132 | rs2750030 | rs2763193 | rs2777795 |
| rs2722406 | rs2727013 | rs27336   | rs2737245 | rs2744133 | rs2750411 | rs2763263 | rs2777803 |
| rs2722425 | rs2727040 | rs2733739 | rs2737252 | rs2744228 | rs2750482 | rs2763265 | rs2777832 |
| rs2722885 | rs2727195 | rs2734031 | rs2737263 | rs2744267 | rs275177  | rs2763895 | rs2777888 |
| rs2723005 | rs2727260 | rs2734037 | rs2737265 | rs2744294 | rs27524   | rs2763979 | rs2777895 |
| rs2723063 | rs2727270 | rs2734221 | rs2737273 | rs2744427 | rs27529   | rs2763981 | rs2777899 |
| rs2723064 | rs2727271 | rs2734331 | rs2737339 | rs2744475 | rs2752914 | rs2764043 | rs2777926 |
| rs2723065 | rs2727365 | rs2734390 | rs2738048 | rs2744726 | rs2753411 | rs2764204 | rs2778031 |
| rs2723067 | rs2727464 | rs2734419 | rs2738058 | rs2744801 | rs2753462 | rs2764209 | rs2779071 |
| rs2723152 | rs2727943 | rs2734424 | rs2738176 | rs2744874 | rs275350  | rs2764261 | rs2779116 |
| rs2723154 | rs2728104 | rs2734442 | rs2738265 | rs2744939 | rs2753884 | rs2764264 | rs2779165 |
| rs2723197 | rs2728107 | rs2734583 | rs2738413 | rs2744948 | rs2753960 | rs2764265 | rs2780215 |
| rs2723242 | rs2728125 | rs2734741 | rs2738446 | rs2744968 | rs27540   | rs27643   | rs2780226 |
| rs2723261 | rs272869  | rs2734837 | rs2738447 | rs2744971 | rs275401  | rs2764627 | rs278064  |
| rs2723334 | rs272889  | rs2734838 | rs2738452 | rs2744977 | rs2754084 | rs2764684 | rs2780701 |
| rs2723357 | rs2728901 | rs2734849 | rs2738464 | rs2745106 | rs2754087 | rs2764766 | rs2780841 |
| rs2723509 | rs2729284 | rs2734950 | rs2738696 | rs2745349 | rs2754171 | rs2764771 | rs2781377 |
| rs2723510 | rs27293   | rs2734971 | rs2738744 | rs2745353 | rs2754511 | rs2764772 | rs2781379 |
| rs2723514 | rs2729354 | rs273504  | rs273909  | rs274546  | rs2755237 | rs27648   | rs2781656 |
| rs2723517 | rs2729450 | rs273505  | rs273913  | rs274555  | rs2755253 | rs2765041 | rs2781668 |
| rs2723519 | rs2729707 | rs273510  | rs273914  | rs2745572 | rs2755256 | rs2765042 | rs2782    |
| rs2723552 | rs2729788 | rs273512  | rs2739156 | rs2745599 | rs2755459 | rs2765496 | rs2782225 |
| rs2723555 | rs2729827 | rs2735421 | rs2739157 | rs274567  | rs2756119 | rs2765539 | rs2782639 |
| rs2723572 | rs2729984 | rs2735556 | rs2739330 | rs2745803 | rs27565   | rs2765974 | rs2782640 |
| rs2723889 | rs2730075 | rs273558  | rs2739419 | rs2745826 | rs2756892 | rs2766547 | rs2782643 |
| rs2724013 | rs2730260 | rs273573  | rs2739430 | rs2745924 | rs2757041 | rs2766594 | rs2782652 |
| rs2724374 | rs2730276 | rs2735839 | rs273945  | rs2745953 | rs2757117 | rs276666  | rs2782653 |
| rs2724375 | rs27303   | rs273593  | rs2739472 | rs2745959 | rs2757524 | rs2766664 | rs2782980 |
| rs2724384 | rs2730806 | rs273594  | rs273957  | rs2745980 | rs2757564 | rs2766666 | rs2782982 |
| rs2724475 | rs2730827 | rs2735940 | rs273958  | rs2746089 | rs2758605 | rs2766667 | rs2783019 |
| rs2724564 | rs2730985 | rs2735948 | rs273966  | rs2746115 | rs2758886 | rs2766678 | rs2783130 |
| rs2724616 | rs2731218 | rs2736098 | rs273990  | rs274632  | rs2758994 | rs2766679 | rs2783441 |
| rs2724625 | rs2731340 | rs2736099 | rs2740    | rs274640  | rs2759301 | rs2766680 | rs2784255 |
| rs2724862 | rs2731439 | rs2736100 | rs2740476 | rs2746427 | rs2759308 | rs2766979 | rs2784598 |
| rs2725117 | rs2731553 | rs2736108 | rs2740479 | rs2746432 | rs2759315 | rs2767036 | rs2784867 |
| rs2725211 | rs2731646 | rs2736109 | rs2740480 | rs2746438 | rs275945  | rs2767322 | rs2785152 |
| rs2725220 | rs2731664 | rs2736154 | rs2740488 | rs2746646 | rs2759663 | rs2767365 | rs2785202 |
| rs2725261 | rs2731670 | rs2736176 | rs2740594 | rs2746995 | rs2760061 | rs2767482 | rs278541  |
| rs2725308 | rs2731672 | rs2736182 | rs2740795 | rs2747399 | rs2760215 | rs2767486 | rs2785638 |
| rs2725370 | rs2731673 | rs2736186 | rs2741012 | rs2747503 | rs2760545 | rs2767627 | rs2785980 |
| rs2725371 | rs2731674 | rs2736201 | rs2741027 | rs274760  | rs2760751 | rs2767713 | rs2785988 |
| rs2725391 | rs2731880 | rs2736208 | rs2741120 | rs2747652 | rs2760975 | rs2768551 | rs2785990 |
| rs2725405 | rs2732151 | rs2736318 | rs2741181 | rs2747716 | rs2760981 | rs2769071 | rs2786098 |
| rs272564  | rs2732317 | rs2736332 | rs2741351 | rs274794  | rs2760995 | rs2769264 | rs2786107 |
| rs272570  | rs2732469 | rs2736336 | rs274136  | rs2748297 | rs2761235 | rs2769438 | rs2786802 |
| rs2725797 | rs2732480 | rs2736337 | rs2741441 | rs2748424 | rs2761311 | rs2769441 | rs2787352 |
| rs2726032 | rs2732481 | rs2736340 | rs2741856 | rs2748425 | rs2761336 | rs2769468 | rs2787394 |
| rs2726034 | rs2732549 | rs2736345 | rs2741884 | rs2748427 | rs2761436 | rs276961  | rs2787486 |
| rs2726036 | rs2732552 | rs2736346 | rs27419   | rs2748444 | rs2761438 | rs2769884 | rs2787594 |
| rs2726040 | rs273259  | rs2736373 | rs2741991 | rs2748666 | rs2761589 | rs2769976 | rs2788093 |
| rs2726052 | rs2732596 | rs2736378 | rs2742112 | rs2748809 | rs2761679 | rs2771011 | rs2788223 |
| rs272607  | rs2732631 | rs2736429 | rs2742234 | rs2748952 | rs2761843 | rs2771046 | rs2788493 |
| rs272617  | rs2732650 | rs2736600 | rs2742540 | rs2748985 | rs2761882 | rs2771316 | rs2788524 |
| rs2726292 | rs2732655 | rs2736609 | rs2742552 | rs2749008 | rs2761884 | rs2772163 | rs278853  |
| rs2726453 | rs2732677 | rs2736750 | rs2742690 | rs2749029 | rs2762049 | rs2772233 | rs2788612 |
| rs2726478 | rs2732699 | rs2736752 | rs2742972 | rs2749097 | rs2762060 | rs2773285 | rs2789111 |
| rs2726479 | rs2732703 | rs2736990 | rs2742973 | rs2749153 | rs2762137 | rs2773469 | rs2789422 |

|           |           |           |             |           |            |            |            |
|-----------|-----------|-----------|-------------|-----------|------------|------------|------------|
| rs2789514 | rs2799573 | rs28081   | rs2815116   | rs2823096 | rs2834655  | rs28366179 | rs2838338  |
| rs278981  | rs2799849 | rs2808290 | rs2815358   | rs2823139 | rs2834670  | rs2836618  | rs2838339  |
| rs2789845 | rs2800281 | rs2808454 | rs2815374   | rs2823140 | rs2834684  | rs28366255 | rs28383454 |
| rs2790    | rs2800445 | rs2808474 | rs28157     | rs2823141 | rs2834705  | rs28366266 | rs28383487 |
| rs2790052 | rs2800703 | rs2808510 | rs2815752   | rs2823253 | rs2834707  | rs28366301 | rs28383634 |
| rs2790102 | rs2800704 | rs2808514 | rs2815757   | rs2823265 | rs2834710  | rs28366362 | rs28384181 |
| rs2790103 | rs2800709 | rs2808519 | rs2815765   | rs2823270 | rs2834711  | rs28367132 | rs28384349 |
| rs2790126 | rs2800711 | rs2808628 | rs2816177   | rs2823272 | rs2834712  | rs28367493 | rs2838519  |
| rs2790208 | rs2800712 | rs2808634 | rs2816316   | rs2823286 | rs2834734  | rs2836754  | rs28385609 |
| rs2790216 | rs2800713 | rs2808772 | rs2816648   | rs2823288 | rs2834735  | rs28367631 | rs28386853 |
| rs2790457 | rs2800733 | rs2809969 | rs2816916   | rs2823376 | rs283477   | rs2836768  | rs28387148 |
| rs2791459 | rs2800778 | rs2810489 | rs2816938   | rs2824138 | rs2834787  | rs28367727 | rs2838771  |
| rs2791547 | rs2800847 | rs2810491 | rs2816958   | rs2824981 | rs2834839  | rs2836779  | rs2838774  |
| rs2791550 | rs2800883 | rs2810587 | rs2816967   | rs282587  | rs28350    | rs28367832 | rs2838787  |
| rs2791559 | rs2801191 | rs2810650 | rs2816992   | rs2825968 | rs2835349  | rs2836789  | rs2838834  |
| rs2791622 | rs2801270 | rs2811366 | rs2817144   | rs28265   | rs2835435  | rs28368105 | rs2838986  |
| rs2791643 | rs2801439 | rs2811387 | rs2817145   | rs2826851 | rs283558   | rs2836878  | rs2839082  |
| rs2791655 | rs2801578 | rs2811403 | rs2817160   | rs2827352 | rs2835718  | rs2836882  | rs2839127  |
| rs2791733 | rs2802292 | rs2811415 | rs2817188   | rs2827879 | rs2835731  | rs2836883  | rs28391274 |
| rs2791736 | rs2802295 | rs2811434 | rs2817399   | rs2828478 | rs2835742  | rs2836884  | rs283914   |
| rs2791737 | rs2802372 | rs2811484 | rs2817419   | rs2828529 | rs2835750  | rs28368872 | rs28391580 |
| rs2791738 | rs2802729 | rs2811487 | rs2817441   | rs28296   | rs2835872  | rs2836921  | rs2839186  |
| rs2792735 | rs2802770 | rs2811518 | rs2817461   | rs2829784 | rs2835985  | rs2836950  | rs28392847 |
| rs2792751 | rs2802867 | rs2811525 | rs28176     | rs2829786 | rs28360612 | rs28370549 | rs28393149 |
| rs2792796 | rs2802993 | rs2811640 | rs281768    | rs283     | rs28360615 | rs28370664 | rs28393318 |
| rs2792990 | rs280322  | rs2811708 | rs2817866   | rs2830472 | rs28360642 | rs28371400 | rs28393360 |
| rs2793109 | rs2803298 | rs2811710 | rs281862010 | rs28305   | rs28360656 | rs28371438 | rs28394864 |
| rs2793112 | rs2803316 | rs2811972 | rs281868    | rs2830500 | rs28360848 | rs28371678 | rs28395178 |
| rs2793351 | rs2803328 | rs2811974 | rs2818766   | rs2830581 | rs28360899 | rs28372698 | rs28395882 |
| rs2793688 | rs2803462 | rs2812    | rs2818988   | rs2830585 | rs28361034 | rs28372734 | rs2839633  |
| rs2793827 | rs2803606 | rs2812197 | rs2819184   | rs2830586 | rs28361325 | rs28372789 | rs28396798 |
| rs2793829 | rs2803621 | rs2812208 | rs2819336   | rs2830913 | rs2836162  | rs28373063 | rs28397663 |
| rs2793925 | rs2803841 | rs2812238 | rs2819438   | rs2830965 | rs2836171  | rs28373428 | rs2839812  |
| rs2794520 | rs2804301 | rs2812378 | rs2819574   | rs2831758 | rs2836179  | rs28373672 | rs28398409 |
| rs2794658 | rs2804362 | rs281296  | rs2819598   | rs2832227 | rs28361986 | rs2837398  | rs28399271 |
| rs2794681 | rs2804414 | rs281297  | rs2819860   | rs2832232 | rs28362263 | rs28374519 | rs28399442 |
| rs2794682 | rs280471  | rs281302  | rs2819861   | rs2832283 | rs28362286 | rs28374715 | rs28399513 |
| rs27947   | rs2804732 | rs281303  | rs2820223   | rs2832402 | rs28362459 | rs28375303 | rs28399607 |
| rs2795315 | rs2804800 | rs281320  | rs2820290   | rs283274  | rs28362590 | rs28375469 | rs28399637 |
| rs2795502 | rs2804804 | rs281323  | rs2820292   | rs2833098 | rs2836262  | rs28377268 | rs28399664 |
| rs2795507 | rs2804894 | rs281324  | rs2820295   | rs283324  | rs28362672 | rs28377357 | rs28400013 |
| rs2796003 | rs2805062 | rs2813297 | rs2820299   | rs283338  | rs28362709 | rs28377390 | rs28400014 |
| rs279619  | rs2805064 | rs28133   | rs2820312   | rs283342  | rs28362721 | rs28377509 | rs28401288 |
| rs2796441 | rs280519  | rs2813495 | rs2820313   | rs2833483 | rs28362901 | rs28377676 | rs28403253 |
| rs2796457 | rs2805495 | rs2813608 | rs2820315   | rs2833522 | rs28362950 | rs28377694 | rs28404134 |
| rs2796793 | rs2806029 | rs2813711 | rs2820426   | rs2833908 | rs28362951 | rs28378811 | rs28404308 |
| rs2796808 | rs2806044 | rs281377  | rs2820436   | rs2833971 | rs2836411  | rs2837992  | rs28404523 |
| rs2797160 | rs2806048 | rs281379  | rs2820441   | rs2834011 | rs2836422  | rs2837999  | rs28404733 |
| rs2797288 | rs28061   | rs281380  | rs2820443   | rs2834081 | rs2836425  | rs2838006  | rs28404798 |
| rs2797305 | rs2806356 | rs281392  | rs2820444   | rs283412  | rs2836427  | rs2838011  | rs28405309 |
| rs279744  | rs2806424 | rs281408  | rs2820446   | rs2834167 | rs2836430  | rs2838012  | rs28406364 |
| rs2797560 | rs2806519 | rs2814080 | rs2820464   | rs2834188 | rs28364331 | rs28380327 | rs28406917 |
| rs2797570 | rs2806561 | rs2814331 | rs2820468   | rs2834253 | rs2836438  | rs28380386 | rs28407950 |
| rs2797685 | rs2806934 | rs281437  | rs2820501   | rs2834256 | rs28364406 | rs28380833 | rs28408270 |
| rs2798224 | rs2806985 | rs281439  | rs2821116   | rs2834257 | rs2836441  | rs283810   | rs28408315 |
| rs2798269 | rs2807031 | rs281440  | rs2821231   | rs2834259 | rs2836444  | rs283811   | rs28408562 |
| rs2798287 | rs2807264 | rs2814471 | rs2821248   | rs2834288 | rs28364531 | rs28381344 | rs28408682 |
| rs2798297 | rs2807303 | rs2814707 | rs2821260   | rs2834310 | rs28364580 | rs28381350 | rs28409621 |
| rs2798304 | rs2807319 | rs2814778 | rs2821332   | rs2834312 | rs28364668 | rs283815   | rs28410307 |
| rs2798334 | rs2807337 | rs2814864 | rs2821357   | rs2834317 | rs28364831 | rs28381684 | rs28410513 |
| rs2798355 | rs2807510 | rs2814944 | rs2821388   | rs2834318 | rs28365587 | rs28383224 | rs2841102  |
| rs2798421 | rs2807740 | rs2814949 | rs2821391   | rs2834319 | rs28365964 | rs28383228 | rs28411166 |
| rs2798603 | rs2807742 | rs2814973 | rs2821411   | rs2834442 | rs28365970 | rs28383254 | rs28411352 |
| rs2798641 | rs2807743 | rs2814982 | rs2822258   | rs2834512 | rs28366013 | rs28383264 | rs28411770 |
| rs2799081 | rs2807834 | rs2814993 | rs2822999   | rs2834591 | rs28366036 | rs28383314 | rs28411823 |
| rs2799098 | rs2807854 | rs2814998 | rs2823002   | rs2834613 | rs28366119 | rs28383322 | rs28411862 |
| rs2799399 | rs2808062 | rs2815114 | rs2823093   | rs2834618 | rs2836613  | rs28383364 | rs28411867 |



|            |            |            |            |            |            |            |            |
|------------|------------|------------|------------|------------|------------|------------|------------|
| rs28412032 | rs28435135 | rs28455964 | rs28482886 | rs28507491 | rs2853333  | rs2855655  | rs28576195 |
| rs28412066 | rs28435470 | rs28456    | rs28483039 | rs28507905 | rs2853336  | rs28556884 | rs28576226 |
| rs28412751 | rs28435578 | rs28456360 | rs28483633 | rs28508297 | rs28533432 | rs28557115 | rs28576256 |
| rs2841277  | rs28436726 | rs28457046 | rs284843   | rs2850979  | rs28533540 | rs2855772  | rs28576490 |
| rs28412876 | rs28436846 | rs2845705  | rs284844   | rs28510415 | rs2853387  | rs2855811  | rs2857693  |
| rs2841329  | rs2843700  | rs28457693 | rs28484580 | rs28510484 | rs28534575 | rs2855812  | rs28576953 |
| rs28413626 | rs28437878 | rs28457763 | rs2848479  | rs28510513 | rs28535078 | rs28558138 | rs28577186 |
| rs28414612 | rs2843800  | rs28458177 | rs28485305 | rs28510563 | rs2853579  | rs28558491 | rs28577594 |
| rs28414958 | rs2843809  | rs28458311 | rs28485535 | rs2851156  | rs2853667  | rs28558559 | rs28577986 |
| rs28415135 | rs28438420 | rs2845847  | rs284859   | rs28512356 | rs2853669  | rs28558845 | rs28578007 |
| rs28415528 | rs28438856 | rs2845871  | rs284860   | rs28512361 | rs2853676  | rs28559758 | rs28578016 |
| rs2841572  | rs28439930 | rs2845885  | rs2848649  | rs28512462 | rs2853677  | rs2855983  | rs28578546 |
| rs28415845 | rs28440013 | rs28458909 | rs2848657  | rs28513081 | rs2853694  | rs28559870 | rs28578714 |
| rs28415942 | rs2844016  | rs28459049 | rs28487964 | rs28513325 | rs28537499 | rs28561542 | rs28580373 |
| rs28416520 | rs28441558 | rs28459406 | rs28488    | rs2851341  | rs2853779  | rs28561649 | rs2858088  |
| rs28416651 | rs28441684 | rs28459838 | rs28488643 | rs28513670 | rs28537805 | rs28561769 | rs28581202 |
| rs28416859 | rs28444102 | rs28459916 | rs2848901  | rs28513882 | rs28538173 | rs28562046 | rs28581225 |
| rs28417201 | rs2844456  | rs28460464 | rs28489187 | rs2851391  | rs2853880  | rs28562483 | rs28581385 |
| rs28418580 | rs2844479  | rs2846072  | rs28489620 | rs28513927 | rs28539243 | rs28562485 | rs28581706 |
| rs28418927 | rs2844480  | rs28461437 | rs28490139 | rs2851435  | rs2853928  | rs28562532 | rs28582096 |
| rs28419375 | rs2844482  | rs28462076 | rs2849017  | rs2851436  | rs28539372 | rs2856321  | rs28583049 |
| rs284200   | rs28444975 | rs28462342 | rs2849018  | rs2851437  | rs2853946  | rs2856437  | rs2858310  |
| rs2842083  | rs2844511  | rs28463783 | rs28491433 | rs2851447  | rs28539528 | rs2856451  | rs2858317  |
| rs28420834 | rs2844519  | rs2846444  | rs28491529 | rs28514730 | rs2853953  | rs28564890 | rs2858330  |
| rs2842126  | rs2844531  | rs28464741 | rs2849225  | rs2851487  | rs2853961  | rs2856650  | rs2858331  |
| rs28421305 | rs28445639 | rs28465008 | rs2849322  | rs28514893 | rs2853977  | rs2856653  | rs28583508 |
| rs28421540 | rs2844584  | rs284651   | rs28493229 | rs28515082 | rs2853989  | rs2856656  | rs28583644 |
| rs28421666 | rs2844606  | rs28465175 | rs28493251 | rs28516445 | rs2854001  | rs2856661  | rs28583837 |
| rs2842176  | rs2844623  | rs28465436 | rs28495254 | rs28516534 | rs2854008  | rs2856674  | rs28584391 |
| rs2842188  | rs28446321 | rs284660   | rs28495552 | rs28516750 | rs28540102 | rs2856687  | rs28584580 |
| rs2842189  | rs2844649  | rs284663   | rs28495625 | rs28517733 | rs28540500 | rs2856698  | rs2858483  |
| rs2842192  | rs28446722 | rs2846630  | rs28495639 | rs285186   | rs2854108  | rs28567061 | rs28584904 |
| rs2842198  | rs28446899 | rs2846667  | rs28495851 | rs28519449 | rs28541419 | rs2856717  | rs28585071 |
| rs284227   | rs28446901 | rs2846714  | rs28496034 | rs28520003 | rs2854160  | rs2856718  | rs28587205 |
| rs28423374 | rs28447194 | rs28468565 | rs28498002 | rs28520091 | rs2854207  | rs2856721  | rs28587776 |
| rs2842352  | rs28447319 | rs2846894  | rs28498086 | rs28520411 | rs2854223  | rs2856723  | rs28588142 |
| rs2842385  | rs28447467 | rs28469095 | rs28498264 | rs28521457 | rs2854275  | rs28567375 | rs2858829  |
| rs284262   | rs28447549 | rs28469124 | rs28498283 | rs2852151  | rs2854277  | rs28567725 | rs28588430 |
| rs28426374 | rs28447555 | rs28470717 | rs28498618 | rs28521571 | rs2854322  | rs28567906 | rs28588745 |
| rs2842638  | rs2844790  | rs28470843 | rs28498859 | rs28521954 | rs2854334  | rs2856816  | rs2858884  |
| rs2842659  | rs28448745 | rs2847224  | rs28498976 | rs28522005 | rs2854355  | rs2856821  | rs2858919  |
| rs2842700  | rs284489   | rs28472312 | rs28499085 | rs28522673 | rs28544074 | rs2856830  | rs2858931  |
| rs284273   | rs284491   | rs2847273  | rs28499105 | rs28522747 | rs28544343 | rs285685   | rs2858942  |
| rs28427480 | rs28449485 | rs2847278  | rs28499138 | rs28522849 | rs28544888 | rs28568568 | rs2858996  |
| rs284277   | rs28449958 | rs2847281  | rs28500514 | rs2852349  | rs2854528  | rs28569936 | rs28591486 |
| rs2842870  | rs28450134 | rs2847293  | rs285006   | rs285245   | rs2854536  | rs2857009  | rs28592650 |
| rs2842873  | rs28450181 | rs28472955 | rs28500712 | rs28525422 | rs285460   | rs28570522 | rs28592811 |
| rs28428925 | rs28450192 | rs2847297  | rs28500790 | rs28526086 | rs2854746  | rs2857078  | rs2859337  |
| rs2842895  | rs28450349 | rs28473022 | rs285012   | rs28526098 | rs2854747  | rs2857151  | rs28594215 |
| rs28429148 | rs28451064 | rs28473232 | rs28501371 | rs28526159 | rs28549    | rs2857204  | rs28594379 |
| rs28429420 | rs284511   | rs28473311 | rs28502318 | rs28526212 | rs2854925  | rs28572127 | rs28594464 |
| rs28429458 | rs28451337 | rs28474889 | rs28502438 | rs2852635  | rs28549862 | rs2857249  | rs28594922 |
| rs28429551 | rs28451436 | rs2847500  | rs2850245  | rs28526575 | rs28550009 | rs2857281  | rs28595628 |
| rs28429906 | rs28451864 | rs28475137 | rs2850248  | rs28528287 | rs28550029 | rs28573110 | rs2859612  |
| rs28430325 | rs28452995 | rs28475163 | rs285026   | rs28528763 | rs28550327 | rs28573806 | rs2859621  |
| rs28430759 | rs28453237 | rs28475438 | rs28503222 | rs2852931  | rs28550561 | rs28573826 | rs2859659  |
| rs28431130 | rs28453815 | rs2847603  | rs28503451 | rs28529476 | rs28550626 | rs2857464  | rs2859661  |
| rs284312   | rs28453840 | rs28476539 | rs2850368  | rs28529655 | rs28551472 | rs28574727 | rs28597716 |
| rs2843152  | rs28454198 | rs28478252 | rs28503706 | rs28530618 | rs2855167  | rs28574812 | rs28597732 |
| rs284316   | rs2845466  | rs28479182 | rs28503795 | rs28530689 | rs28551708 | rs2857482  | rs2859814  |
| rs284317   | rs28455602 | rs28479481 | rs28503877 | rs28530750 | rs28552587 | rs28575268 | rs2859868  |
| rs28432336 | rs2845572  | rs28479767 | rs28504650 | rs28531809 | rs28552810 | rs2857594  | rs28599724 |
| rs28433345 | rs2845573  | rs28480230 | rs28505285 | rs2853203  | rs28552840 | rs2857595  | rs2859977  |
| rs28433586 | rs28455731 | rs28480494 | rs2850542  | rs28532037 | rs2855446  | rs2857598  | rs28599782 |
| rs2843401  | rs28455815 | rs284816   | rs28505555 | rs28532161 | rs2855469  | rs2857599  | rs28599891 |
| rs28434172 | rs28455852 | rs28481863 | rs28505677 | rs28533072 | rs28555129 | rs2857602  | rs286      |
| rs28434767 | rs28455953 | rs28482086 | rs28505901 | rs28533147 | rs2855530  | rs2857605  | rs28600082 |

|            |            |            |            |            |            |            |            |
|------------|------------|------------|------------|------------|------------|------------|------------|
| rs2860049  | rs28627461 | rs28657002 | rs28687325 | rs2871632  | rs2875087  | rs2880192  | rs2886671  |
| rs28600710 | rs28627463 | rs28657585 | rs28687557 | rs28717373 | rs28751879 | rs28802424 | rs2887218  |
| rs28600726 | rs28628397 | rs28658282 | rs28687655 | rs2871865  | rs28752520 | rs2880301  | rs28872512 |
| rs28601761 | rs2862851  | rs28658452 | rs28687756 | rs2871876  | rs28752523 | rs2880345  | rs28873836 |
| rs2860183  | rs2862954  | rs28659908 | rs28688110 | rs28718978 | rs28752534 | rs2880364  | rs2887399  |
| rs2860199  | rs2862961  | rs28659953 | rs2868829  | rs2871960  | rs287527   | rs28807105 | rs28874286 |
| rs28602288 | rs28629903 | rs28660345 | rs28688305 | rs2871974  | rs28754290 | rs28813180 | rs28874920 |
| rs2860235  | rs28629923 | rs2866209  | rs28688440 | rs28719775 | rs28755170 | rs2881425  | rs28874975 |
| rs28602385 | rs2862996  | rs28663144 | rs28688825 | rs28719835 | rs28755358 | rs2881493  | rs2887571  |
| rs2860284  | rs28629977 | rs28663442 | rs2868975  | rs2871993  | rs28757157 | rs28815022 | rs288762   |
| rs2860300  | rs2863081  | rs2866466  | rs2868996  | rs2872041  | rs2875762  | rs28817415 | rs2887623  |
| rs28603130 | rs28631087 | rs28664709 | rs28690449 | rs28720928 | rs28758542 | rs288175   | rs28876383 |
| rs28603236 | rs28631169 | rs28664826 | rs2869045  | rs28721375 | rs28758902 | rs2881756  | rs28880687 |
| rs2860457  | rs28631485 | rs28664852 | rs28690953 | rs28721484 | rs2875907  | rs28817902 | rs2888526  |
| rs2860482  | rs2863171  | rs28665337 | rs28691713 | rs28722029 | rs28759486 | rs288183   | rs2888540  |
| rs2860511  | rs28632066 | rs28665356 | rs28692966 | rs2872246  | rs2875973  | rs2881854  | rs28886334 |
| rs2860517  | rs2863244  | rs28665840 | rs28693003 | rs287227   | rs28760377 | rs28819459 | rs28886684 |
| rs28605724 | rs28633576 | rs2866611  | rs28693921 | rs28722705 | rs287606   | rs2881955  | rs2888814  |
| rs2860580  | rs28633718 | rs28667150 | rs28693939 | rs28723417 | rs28761289 | rs28819812 | rs28888764 |
| rs28606370 | rs28634184 | rs2866720  | rs28694217 | rs28724212 | rs2876167  | rs28819846 | rs28891214 |
| rs28607014 | rs28634469 | rs2866724  | rs28694735 | rs28724231 | rs2876301  | rs2882049  | rs28891973 |
| rs28607641 | rs28634651 | rs2866745  | rs28695210 | rs28724242 | rs2876354  | rs28820925 | rs28892005 |
| rs28607662 | rs28634972 | rs28667801 | rs2869529  | rs28724898 | rs28763977 | rs28822480 | rs28892332 |
| rs2860773  | rs28635831 | rs28669119 | rs28695458 | rs2872507  | rs2876520  | rs288230   | rs28893517 |
| rs28607847 | rs28636815 | rs2866947  | rs2869548  | rs2872615  | rs2876586  | rs2882325  | rs28894080 |
| rs28608151 | rs2863714  | rs28669886 | rs2869566  | rs28726372 | rs2876643  | rs28823280 | rs28894691 |
| rs28608203 | rs28637706 | rs28669908 | rs286965   | rs28727880 | rs2876694  | rs28824216 | rs28895001 |
| rs28608599 | rs28637873 | rs286701   | rs2869669  | rs28727898 | rs28767468 | rs2882485  | rs28895016 |
| rs28608630 | rs28637892 | rs2867112  | rs28696943 | rs28727938 | rs28768122 | rs28827913 | rs28895057 |
| rs28608644 | rs28637922 | rs28671232 | rs28698732 | rs2872812  | rs2876826  | rs2882877  | rs28895243 |
| rs28608872 | rs28638318 | rs2867125  | rs28699126 | rs28729182 | rs28768427 | rs28830565 | rs2889535  |
| rs2860911  | rs28639492 | rs28672845 | rs286996   | rs28729203 | rs28768973 | rs2883217  | rs2889657  |
| rs28609654 | rs2863957  | rs2867296  | rs2869966  | rs28730491 | rs28768976 | rs28832309 | rs28896784 |
| rs2861089  | rs2863979  | rs28673647 | rs2869967  | rs28730837 | rs28771425 | rs288326   | rs28898590 |
| rs28611065 | rs28639817 | rs28673728 | rs287      | rs28731356 | rs2877561  | rs28833542 | rs28898617 |
| rs28611339 | rs2864034  | rs2867461  | rs28701841 | rs2873195  | rs2877569  | rs28833881 | rs2889874  |
| rs2861139  | rs28641468 | rs28675079 | rs28701981 | rs28732100 | rs28777    | rs28834106 | rs2889896  |
| rs28612075 | rs28641793 | rs28675349 | rs2870238  | rs28732143 | rs2877716  | rs28834970 | rs2889964  |
| rs28612284 | rs28642213 | rs28675386 | rs28702684 | rs28732145 | rs28778940 | rs28835002 | rs2890013  |
| rs28612945 | rs28642252 | rs2867566  | rs287028   | rs28732148 | rs28780086 | rs28836469 | rs28903073 |
| rs28613002 | rs28642975 | rs2867570  | rs2870281  | rs28732162 | rs28780100 | rs28836541 | rs2890364  |
| rs28613267 | rs2864419  | rs2867673  | rs2870308  | rs28732173 | rs28780111 | rs2883723  | rs2890652  |
| rs28613416 | rs28645201 | rs286768   | rs28703878 | rs28732180 | rs2878172  | rs2883821  | rs28906671 |
| rs28613487 | rs28645341 | rs2867690  | rs28705704 | rs28732201 | rs2878349  | rs28839214 | rs2890772  |
| rs28613963 | rs28646156 | rs28678108 | rs28707003 | rs28732213 | rs28784969 | rs28840750 | rs28908768 |
| rs2861422  | rs28646179 | rs28678152 | rs2870710  | rs28733161 | rs2878628  | rs28840973 | rs28910273 |
| rs28615248 | rs28646281 | rs28678167 | rs2870784  | rs28735056 | rs2878677  | rs28844285 | rs2891168  |
| rs28615996 | rs28647734 | rs28678518 | rs28708888 | rs28735420 | rs28787109 | rs2884442  | rs2891403  |
| rs28616142 | rs28647808 | rs28678897 | rs28709068 | rs28735993 | rs287879   | rs2884593  | rs2891431  |
| rs2861685  | rs28647874 | rs2867933  | rs2870933  | rs28736584 | rs287883   | rs2884691  | rs2891546  |
| rs2861690  | rs28648707 | rs28679452 | rs28709375 | rs28737193 | rs287884   | rs28847046 | rs2891677  |
| rs28617673 | rs2864915  | rs2867972  | rs28710106 | rs28738966 | rs2878889  | rs28847895 | rs2892347  |
| rs2861819  | rs28649190 | rs28680305 | rs28710957 | rs28740872 | rs2878902  | rs2884836  | rs2892512  |
| rs28619038 | rs28649231 | rs28680325 | rs28711392 | rs28741121 | rs28789690 | rs28849176 | rs28925904 |
| rs28619302 | rs28649910 | rs286808   | rs28711442 | rs2874367  | rs28790585 | rs28850104 | rs28926173 |
| rs28620532 | rs28650012 | rs28680850 | rs28711761 | rs28744551 | rs28791905 | rs2885034  | rs28927680 |
| rs2862064  | rs28651018 | rs286809   | rs28711886 | rs2874490  | rs28792186 | rs2885056  | rs2892827  |
| rs28620926 | rs2865116  | rs2868095  | rs28712435 | rs2874670  | rs28792187 | rs28851880 | rs2892838  |
| rs28621435 | rs2865376  | rs28680958 | rs28712486 | rs28746814 | rs287932   | rs2885198  | rs28928597 |
| rs28621809 | rs28654182 | rs28681284 | rs28712547 | rs28746950 | rs28795989 | rs2885296  | rs28928907 |
| rs2862183  | rs28654350 | rs28681372 | rs28712821 | rs28747027 | rs28797500 | rs2885521  | rs28929470 |
| rs28624558 | rs28655023 | rs28681431 | rs2871289  | rs2874800  | rs287982   | rs2885697  | rs28929474 |
| rs28624578 | rs2865505  | rs2868194  | rs28714278 | rs28748079 | rs28798705 | rs28857569 | rs28930677 |
| rs28624681 | rs2865531  | rs2868346  | rs2871473  | rs28749114 | rs2879910  | rs2885928  | rs28932178 |
| rs28624974 | rs28655666 | rs2868371  | rs28715    | rs28749130 | rs2880058  | rs2886444  | rs2893787  |
| rs28626308 | rs28656273 | rs28686893 | rs28715540 | rs28749131 | rs2880099  | rs28866311 | rs2893907  |
| rs28626624 | rs28656344 | rs2868708  | rs28716319 | rs28749551 | rs2880119  | rs28866344 | rs2893910  |

|            |            |           |           |           |           |           |           |
|------------|------------|-----------|-----------|-----------|-----------|-----------|-----------|
| rs2893916  | rs29001570 | rs2908279 | rs2916184 | rs29232   | rs2934510 | rs2943653 | rs2952286 |
| rs2893919  | rs2900177  | rs2908282 | rs2916193 | rs29234   | rs2934679 | rs2943656 | rs2952289 |
| rs289394   | rs2900180  | rs2908286 | rs2916247 | rs2923402 | rs2934701 | rs2943657 | rs2952293 |
| rs2894204  | rs2900208  | rs2908290 | rs2916251 | rs2923403 | rs2934744 | rs2943658 | rs295258  |
| rs2894207  | rs2900333  | rs2908425 | rs2916490 | rs2923411 | rs2934844 | rs2943660 | rs2952615 |
| rs2894254  | rs2900478  | rs2908522 | rs2916577 | rs2923424 | rs2934849 | rs294381  | rs295268  |
| rs2894257  | rs2900528  | rs290857  | rs291671  | rs2923427 | rs2934952 | rs2944542 | rs295273  |
| rs2894281  | rs2901000  | rs2908574 | rs2916733 | rs2923437 | rs2934956 | rs2944590 | rs2952858 |
| rs2894381  | rs2901008  | rs2908889 | rs2917568 | rs2923447 | rs2935057 | rs2944591 | rs2952863 |
| rs28945068 | rs2901184  | rs2908972 | rs2917677 | rs2924251 | rs2935072 | rs294468  | rs2953013 |
| rs2894586  | rs2901286  | rs2909034 | rs2917949 | rs2924321 | rs293526  | rs2944772 | rs2953060 |
| rs28946889 | rs2901381  | rs290904  | rs291821  | rs2924328 | rs2935303 | rs2944822 | rs2953196 |
| rs2894802  | rs2901460  | rs2909218 | rs2918300 | rs2924767 | rs293561  | rs2944823 | rs295322  |
| rs2894808  | rs2901656  | rs2909443 | rs2918302 | rs2924808 | rs2935618 | rs2944831 | rs2953235 |
| rs2894837  | rs2901761  | rs2909455 | rs2918307 | rs2924810 | rs293566  | rs2944839 | rs2953329 |
| rs2894889  | rs2901785  | rs2909457 | rs2918308 | rs2925033 | rs2936512 | rs2945091 | rs2953511 |
| rs289515   | rs2901796  | rs2909678 | rs2918738 | rs2925049 | rs2936681 | rs2945232 | rs2953761 |
| rs289519   | rs2902065  | rs290995  | rs2919290 | rs2925128 | rs2936938 | rs2945247 | rs2953796 |
| rs28952024 | rs2902142  | rs2910032 | rs2919451 | rs2925339 | rs2937071 | rs2945400 | rs2953805 |
| rs2895249  | rs290227   | rs2910162 | rs2919691 | rs2925345 | rs2937124 | rs2945412 | rs2953898 |
| rs2895526  | rs2902548  | rs291040  | rs291970  | rs2925635 | rs2937336 | rs2945731 | rs2954017 |
| rs2895747  | rs290268   | rs2910580 | rs2919869 | rs2925677 | rs2937371 | rs2945816 | rs2954021 |
| rs2895811  | rs2902940  | rs2910583 | rs2919917 | rs2925763 | rs2937582 | rs2945858 | rs2954022 |
| rs2895917  | rs2902941  | rs2910644 | rs2919932 | rs2925979 | rs2937859 | rs2945874 | rs2954026 |
| rs2896019  | rs2903385  | rs2910686 | rs292026  | rs2926585 | rs2938134 | rs2946005 | rs2954027 |
| rs2896175  | rs2903386  | rs2910823 | rs2920281 | rs2926614 | rs2938670 | rs2946164 | rs2954029 |
| rs2896526  | rs2903421  | rs2910949 | rs2920283 | rs2926702 | rs2938697 | rs2946179 | rs2954031 |
| rs2896635  | rs2903492  | rs2910996 | rs2920293 | rs2926743 | rs293914  | rs2946653 | rs2954032 |
| rs2897048  | rs2903517  | rs2911268 | rs2920503 | rs2926772 | rs293916  | rs2946994 | rs2954033 |
| rs2897075  | rs2903578  | rs2911280 | rs2920505 | rs2926799 | rs2939523 | rs2947080 | rs2954038 |
| rs28971169 | rs2903692  | rs2911463 | rs2920879 | rs2926864 | rs2939756 | rs2947349 | rs2954111 |
| rs289713   | rs2903995  | rs2911645 | rs2920880 | rs2926999 | rs2939931 | rs2947411 | rs2954114 |
| rs289715   | rs2904155  | rs2911971 | rs2920899 | rs2927176 | rs2941428 | rs294775  | rs2955083 |
| rs289718   | rs2904259  | rs2911987 | rs2920917 | rs2927439 | rs2941432 | rs294777  | rs2955088 |
| rs289719   | rs2904270  | rs2912054 | rs2920939 | rs2927447 | rs2941465 | rs294778  | rs2955117 |
| rs28972181 | rs2904552  | rs2912062 | rs2920940 | rs2927468 | rs2941471 | rs2948094 | rs2955382 |
| rs28972590 | rs2904758  | rs2912063 | rs2921036 | rs2927482 | rs2941484 | rs2948097 | rs2955587 |
| rs289727   | rs2904789  | rs2912522 | rs2921041 | rs2927608 | rs2941487 | rs2948149 | rs2955821 |
| rs289742   | rs2904880  | rs291269  | rs2921042 | rs2928140 | rs2941488 | rs29482   | rs2955982 |
| rs2897442  | rs2904967  | rs2912774 | rs2921051 | rs2928148 | rs2941505 | rs2948276 | rs2956092 |
| rs289752   | rs2904978  | rs2912778 | rs2921053 | rs2928166 | rs2941509 | rs2948294 | rs2956278 |
| rs2897754  | rs2905064  | rs2913436 | rs2921057 | rs2928167 | rs2941522 | rs2948566 | rs2956287 |
| rs2897790  | rs2905343  | rs2913445 | rs2921059 | rs2928601 | rs2941551 | rs2949006 | rs2956605 |
| rs2897807  | rs2905424  | rs291367  | rs2921060 | rs2928679 | rs2941580 | rs294914  | rs2956633 |
| rs2898191  | rs2905425  | rs2913873 | rs2921064 | rs2929032 | rs2941740 | rs2949661 | rs2957128 |
| rs2898245  | rs2905426  | rs2913962 | rs2921071 | rs2929122 | rs2941741 | rs2949669 | rs2957137 |
| rs289828   | rs2905427  | rs2913974 | rs2921098 | rs2929184 | rs2941954 | rs2949785 | rs2957471 |
| rs2898290  | rs2905432  | rs2913980 | rs2921378 | rs2929282 | rs2942168 | rs2949833 | rs2957582 |
| rs28986170 | rs2905582  | rs2913995 | rs2921421 | rs2929308 | rs2942194 | rs2949837 | rs2957658 |
| rs28986304 | rs2905736  | rs2914119 | rs2921447 | rs2929392 | rs2942202 | rs295     | rs2957664 |
| rs28986310 | rs2905801  | rs2914228 | rs2921552 | rs2929451 | rs2942216 | rs2950015 | rs2957666 |
| rs28986317 | rs2905804  | rs2914276 | rs2921604 | rs2929508 | rs294227  | rs2950218 | rs2957683 |
| rs28986343 | rs290601   | rs291447  | rs292168  | rs2929511 | rs2942375 | rs2950387 | rs2957692 |
| rs2898883  | rs2906140  | rs2914598 | rs292172  | rs2929860 | rs2942884 | rs2950389 | rs2957740 |
| rs2898885  | rs2906153  | rs2914609 | rs2921759 | rs2930047 | rs2943031 | rs2950390 | rs2957742 |
| rs28989231 | rs2906455  | rs291468  | rs2922755 | rs2930191 | rs2943252 | rs2950393 | rs2957933 |
| rs28990715 | rs290671   | rs2915023 | rs292285  | rs2930456 | rs2943539 | rs2950706 | rs2958130 |
| rs28991009 | rs2906856  | rs2915025 | rs2922895 | rs2930537 | rs2943559 | rs2950835 | rs2958137 |
| rs2899297  | rs2907272  | rs2915251 | rs2922966 | rs2930575 | rs2943634 | rs295114  | rs2958162 |
| rs2899319  | rs29073    | rs2915293 | rs2922994 | rs2930883 | rs2943636 | rs2951398 | rs2958182 |
| rs28993469 | rs2907384  | rs2915594 | rs2922996 | rs2932513 | rs2943637 | rs295140  | rs2958183 |
| rs2899463  | rs290773   | rs2915607 | rs2923008 | rs2932536 | rs2943640 | rs295145  | rs2958184 |
| rs2899472  | rs2907794  | rs2915766 | rs2923078 | rs2932538 | rs2943641 | rs2951833 | rs295849  |
| rs2899663  | rs2907948  | rs2915859 | rs2923093 | rs2932878 | rs2943645 | rs2951842 | rs2958540 |
| rs28998802 | rs2908004  | rs2915875 | rs2923097 | rs2933211 | rs2943646 | rs2952110 | rs2958542 |
| rs28999107 | rs2908007  | rs2916142 | rs2923125 | rs2933451 | rs2943650 | rs2952156 | rs2958557 |
| rs28999676 | rs2908274  | rs2916148 | rs2923177 | rs293428  | rs2943652 | rs2952251 | rs2959011 |

|           |           |           |           |           |           |           |           |
|-----------|-----------|-----------|-----------|-----------|-----------|-----------|-----------|
| rs2959025 | rs2967668 | rs2973350 | rs29797   | rs2991973 | rs3002417 | rs3014240 | rs3024321 |
| rs2959084 | rs2967676 | rs297343  | rs2979862 | rs2991996 | rs3002433 | rs3014242 | rs3024493 |
| rs2959356 | rs2967677 | rs297346  | rs2980423 | rs2992037 | rs3002598 | rs3014707 | rs3024505 |
| rs2960151 | rs2967678 | rs2973732 | rs2980436 | rs2992262 | rs3003    | rs3014807 | rs3024589 |
| rs2960306 | rs296790  | rs2974312 | rs2980439 | rs2992327 | rs3003137 | rs3014860 | rs3024619 |
| rs2960422 | rs296797  | rs2974314 | rs2980478 | rs2992333 | rs3003333 | rs3015455 | rs3024622 |
| rs2960578 | rs29681   | rs2974322 | rs2980505 | rs2992632 | rs3003334 | rs3015497 | rs3024655 |
| rs2960659 | rs2968426 | rs2974366 | rs2980512 | rs2992649 | rs3003574 | rs3015501 | rs3024664 |
| rs2961111 | rs296847  | rs2974389 | rs2980752 | rs2992753 | rs3003612 | rs3016018 | rs3024665 |
| rs2961544 | rs2968478 | rs2974438 | rs2980755 | rs2992756 | rs3004063 | rs3016175 | rs3024713 |
| rs2961693 | rs2968487 | rs2974454 | rs2980769 | rs2992836 | rs3004071 | rs3016235 | rs3024739 |
| rs2961761 | rs296880  | rs2974550 | rs2980813 | rs2993047 | rs3004316 | rs3016797 | rs3024921 |
| rs2961816 | rs2968863 | rs2974609 | rs2980853 | rs2993262 | rs3004929 | rs301696  | rs3024971 |
| rs2961817 | rs2968864 | rs2974751 | rs2980858 | rs2993263 | rs3006584 | rs3017049 | rs3025020 |
| rs2961831 | rs296887  | rs2974760 | rs2980869 | rs2993426 | rs3006593 | rs3017106 | rs3025033 |
| rs2961853 | rs296888  | rs2974929 | rs2980875 | rs2993481 | rs3006802 | rs3017289 | rs3025047 |
| rs2961900 | rs296889  | rs2975009 | rs2980876 | rs2993535 | rs3006917 | rs3017621 | rs3025049 |
| rs2961914 | rs2968973 | rs2975059 | rs2980879 | rs299371  | rs300703  | rs3017756 | rs3025053 |
| rs2961920 | rs2969037 | rs2975187 | rs298088  | rs29938   | rs3007163 | rs301793  | rs30252   |
| rs2962082 | rs2969070 | rs2975734 | rs2980884 | rs29939   | rs3007364 | rs301795  | rs3025312 |
| rs2962246 | rs2969072 | rs297578  | rs2980885 | rs299397  | rs3007421 | rs301797  | rs3025316 |
| rs2962378 | rs2969076 | rs297587  | rs2980888 | rs2994007 | rs300751  | rs301798  | rs3025327 |
| rs2962383 | rs2969180 | rs297589  | rs2981027 | rs29941   | rs300756  | rs301799  | rs3025343 |
| rs2962438 | rs2969903 | rs297593  | rs2981329 | rs29943   | rs3008034 | rs301800  | rs3025360 |
| rs2962466 | rs2970015 | rs2976178 | rs2981575 | rs2994326 | rs3008452 | rs301801  | rs3025383 |
| rs2962508 | rs2970332 | rs2976388 | rs2981578 | rs2994651 | rs3008629 | rs301802  | rs3025387 |
| rs2963463 | rs2970356 | rs2976394 | rs2981579 | rs2994672 | rs3008705 | rs301803  | rs3025388 |
| rs2963468 | rs2970358 | rs2976397 | rs2981582 | rs2994813 | rs3008713 | rs301804  | rs3025678 |
| rs2963469 | rs2970581 | rs2976442 | rs2982360 | rs2995264 | rs3008812 | rs301805  | rs3026096 |
| rs2963471 | rs2970592 | rs2976530 | rs2982521 | rs299615  | rs3008870 | rs301806  | rs3026101 |
| rs2963472 | rs2970610 | rs2976842 | rs2982552 | rs2996428 | rs3008892 | rs301807  | rs3026389 |
| rs296360  | rs2970818 | rs2976932 | rs2982570 | rs2997084 | rs300903  | rs301816  | rs3026393 |
| rs296363  | rs2970854 | rs2976944 | rs2982573 | rs2997325 | rs300917  | rs301817  | rs3026401 |
| rs296369  | rs2970870 | rs2976958 | rs2982694 | rs2997341 | rs300934  | rs301819  | rs3026445 |
| rs296381  | rs2970871 | rs2977046 | rs2982708 | rs299741  | rs3009947 | rs3018362 | rs30266   |
| rs296391  | rs2970876 | rs2977064 | rs2982712 | rs2997447 | rs3009958 | rs3018667 | rs3026629 |
| rs296396  | rs2970877 | rs2977303 | rs2983511 | rs2997995 | rs301     | rs3018695 | rs302686  |
| rs2964007 | rs2970901 | rs2977324 | rs2983514 | rs2998286 | rs3010106 | rs30187   | rs3026968 |
| rs2964049 | rs2970989 | rs2977329 | rs2983533 | rs2998299 | rs3010239 | rs3018712 | rs3026996 |
| rs2964199 | rs2970991 | rs2977464 | rs2984348 | rs2998314 | rs3010276 | rs301901  | rs3027001 |
| rs2964252 | rs2971609 | rs2977479 | rs2984613 | rs2998333 | rs301043  | rs3019536 | rs3027003 |
| rs2964255 | rs2971640 | rs2977562 | rs2984644 | rs2998949 | rs301127  | rs3019885 | rs302714  |
| rs2965030 | rs2971669 | rs2977799 | rs2985    | rs2999052 | rs3011549 | rs3019885 | rs302719  |
| rs2965072 | rs2971670 | rs2978098 | rs298601  | rs2999076 | rs301157  | rs3020331 | rs3027234 |
| rs2965164 | rs2971672 | rs2978277 | rs2986010 | rs2999090 | rs301161  | rs3020332 | rs3027279 |
| rs2965169 | rs2971879 | rs2978362 | rs2986669 | rs2999157 | rs3011641 | rs3020333 | rs3027476 |
| rs2965183 | rs2971880 | rs2978382 | rs2986736 | rs2999158 | rs3011644 | rs3020359 | rs3027933 |
| rs2965185 | rs2971887 | rs29784   | rs2987390 | rs2999159 | rs3011685 | rs3020372 | rs302864  |
| rs2965199 | rs2971963 | rs2978456 | rs2988004 | rs299938  | rs3011823 | rs3020418 | rs3029439 |
| rs2965205 | rs2971970 | rs2978895 | rs2988114 | rs2999422 | rs3012053 | rs3020429 | rs302953  |
| rs2965298 | rs2972138 | rs2978981 | rs2988277 | rs2999987 | rs3012060 | rs3020619 | rs303084  |
| rs296547  | rs2972140 | rs2979025 | rs2989476 | rs30000   | rs301218  | rs3020623 | rs303183  |
| rs2965667 | rs2972143 | rs2979139 | rs2989736 | rs3000038 | rs3012434 | rs3020736 | rs3032555 |
| rs2965812 | rs2972144 | rs2979151 | rs2989751 | rs3000073 | rs3012439 | rs3020781 | rs3032928 |
| rs2966090 | rs2972145 | rs2979162 | rs2989868 | rs3000528 | rs3012455 | rs30208-T | rs303343  |
| rs2966114 | rs2972146 | rs2979181 | rs2989871 | rs300053  | rs3012465 | rs3020811 | rs30351   |
| rs2966157 | rs2972147 | rs29792   | rs2990220 | rs3000790 | rs3012850 | rs302101  | rs30353   |
| rs2966422 | rs2972155 | rs2979204 | rs2990223 | rs3001032 | rs3013105 | rs3021058 | rs30371   |
| rs2966440 | rs2972164 | rs2979253 | rs2990245 | rs3001115 | rs3013252 | rs3021304 | rs30372   |
| rs2966450 | rs2972166 | rs2979256 | rs2990246 | rs3001189 | rs3013274 | rs3021338 | rs30373   |
| rs2966858 | rs2972207 | rs297937  | rs2990535 | rs300132  | rs3013431 | rs3021416 | rs303752  |
| rs2967374 | rs2972210 | rs2979469 | rs2990657 | rs3001426 | rs3013439 | rs302153  | rs303753  |
| rs2967383 | rs2972228 | rs2979470 | rs2990870 | rs300143  | rs3013733 | rs30226   | rs303760  |
| rs2967516 | rs2972516 | rs2979472 | rs299118  | rs3001723 | rs301385  | rs30227   | rs30380   |
| rs2967595 | rs2972581 | rs2979488 | rs299163  | rs3001860 | rs301395  | rs302321  | rs303937  |
| rs2967602 | rs2972770 | rs2979489 | rs2991716 | rs3002284 | rs3014195 | rs30233   | rs303948  |
| rs2967605 | rs2973155 | rs29795   | rs2991971 | rs3002416 | rs3014201 | rs302395  | rs303949  |

|           |           |           |           |           |           |           |           |
|-----------|-----------|-----------|-----------|-----------|-----------|-----------|-----------|
| rs303968  | rs308403  | rs3094013 | rs3101341 | rs3110641 | rs3118252 | rs3127084 | rs3130040 |
| rs304001  | rs308439  | rs309403  | rs3101471 | rs3110697 | rs3118359 | rs3127166 | rs3130048 |
| rs304023  | rs308499  | rs3094067 | rs3101725 | rs3110823 | rs3118365 | rs312722  | rs3130116 |
| rs304132  | rs308521  | rs3094078 | rs3101742 | rs311103  | rs3118469 | rs312729  | rs3130127 |
| rs304136  | rs3085271 | rs3094084 | rs3101823 | rs3111251 | rs3118470 | rs3127344 | rs3130141 |
| rs304137  | rs3085826 | rs3094092 | rs310231  | rs3111316 | rs3118471 | rs3127447 | rs3130160 |
| rs304138  | rs3086168 | rs3094097 | rs310244  | rs3111414 | rs3118515 | rs312750  | rs3130169 |
| rs304151  | rs308690  | rs3094127 | rs3102560 | rs3111637 | rs3118519 | rs312755  | rs313021  |
| rs304296  | rs308705  | rs3094128 | rs310291  | rs3112090 | rs3118520 | rs3127553 | rs3130218 |
| rs3043    | rs3087054 | rs3094188 | rs3102960 | rs3112255 | rs3118663 | rs3127573 | rs3130253 |
| rs3047739 | rs3087243 | rs3094212 | rs3103267 | rs3112612 | rs3118667 | rs3127574 | rs3130269 |
| rs3047819 | rs3087253 | rs3094222 | rs3103310 | rs3112643 | rs3118754 | rs312824  | rs3130283 |
| rs3049697 | rs3087367 | rs3094339 | rs310333  | rs3112681 | rs3118903 | rs3128341 | rs3130288 |
| rs305068  | rs3087523 | rs3094448 | rs3103602 | rs3113037 | rs3118905 | rs3128384 | rs3130320 |
| rs305077  | rs3087591 | rs3094604 | rs3103933 | rs3113262 | rs3118906 | rs3128438 | rs3130342 |
| rs305082  | rs3087595 | rs3094622 | rs310405  | rs3113281 | rs3118910 | rs3128900 | rs3130379 |
| rs305083  | rs3087657 | rs3094650 | rs3104154 | rs3113509 | rs3118914 | rs3128967 | rs3130427 |
| rs305092  | rs3087660 | rs3094669 | rs310421  | rs3113767 | rs3118917 | rs3128981 | rs3130482 |
| rs3052071 | rs3087686 | rs3094682 | rs3104222 | rs3114018 | rs31196   | rs3129055 | rs3130486 |
| rs3052195 | rs308774  | rs3094772 | rs3104361 | rs3114020 | rs3119837 | rs3129109 | rs3130490 |
| rs305221  | rs3087852 | rs3094893 | rs3104367 | rs3114045 | rs3120047 | rs3129119 | rs3130491 |
| rs30526   | rs3087888 | rs3094901 | rs3104369 | rs3114670 | rs3120124 | rs3129120 | rs3130501 |
| rs3053061 | rs3087967 | rs3095075 | rs3104373 | rs3114908 | rs3120139 | rs3129137 | rs3130507 |
| rs3053386 | rs3087968 | rs3095089 | rs3104376 | rs3114910 | rs312023  | rs3129157 | rs3130542 |
| rs305418  | rs3087969 | rs3095122 | rs3104389 | rs3114914 | rs312030  | rs3129171 | rs3130544 |
| rs305426  | rs308805  | rs3095208 | rs3104394 | rs311500  | rs3120630 | rs3129178 | rs3130559 |
| rs305437  | rs3088050 | rs3095254 | rs3104402 | rs3115418 | rs312068  | rs3129205 | rs3130564 |
| rs3055140 | rs3088186 | rs3095318 | rs3104412 | rs3115524 | rs3120852 | rs312924  | rs3130573 |
| rs3055240 | rs3088220 | rs3095340 | rs3104413 | rs3115573 | rs31209   | rs312925  | rs3130582 |
| rs3055861 | rs3088258 | rs3095508 | rs3104435 | rs3115574 | rs31211   | rs312927  | rs3130614 |
| rs3055915 | rs3091242 | rs309556  | rs3104767 | rs3115631 | rs3121419 | rs3129399 | rs3130618 |
| rs305686  | rs3091244 | rs3095602 | rs3104778 | rs3115663 | rs3121567 | rs3129430 | rs3130631 |
| rs3057314 | rs3091307 | rs3095605 | rs3104783 | rs3115670 | rs3121672 | rs312945  | rs3130662 |
| rs3058046 | rs3091309 | rs309563  | rs3105056 | rs3115672 | rs3121685 | rs3129500 | rs3130682 |
| rs3060    | rs3091315 | rs309571  | rs3105176 | rs3116139 | rs3121779 | rs3129682 | rs3130683 |
| rs306005  | rs3091316 | rs309584  | rs310528  | rs3116162 | rs3121830 | rs3129716 | rs3130696 |
| rs3060245 | rs3091338 | rs3095844 | rs3105593 | rs3116168 | rs3122163 | rs3129720 | rs3130725 |
| rs306106  | rs3091653 | rs309587  | rs3105749 | rs311629  | rs3122231 | rs3129757 | rs3130740 |
| rs306173  | rs309185  | rs309588  | rs3105793 | rs3116590 | rs3122424 | rs312976  | rs3130783 |
| rs3063286 | rs309190  | rs309589  | rs310614  | rs3116602 | rs31226   | rs3129763 | rs3130820 |
| rs30641   | rs3091995 | rs309591  | rs3106166 | rs3116613 | rs3122605 | rs3129769 | rs3130825 |
| rs306755  | rs3092018 | rs309596  | rs310630  | rs3116614 | rs3122929 | rs3129787 | rs3130834 |
| rs3068249 | rs3092073 | rs3096150 | rs310631  | rs3116625 | rs3123078 | rs3129788 | rs3130895 |
| rs306890  | rs30922   | rs3096277 | rs3106323 | rs3116989 | rs3123543 | rs3129791 | rs3130901 |
| rs3069003 | rs3092364 | rs3096380 | rs310642  | rs3116994 | rs3123636 | rs3129797 | rs3130931 |
| rs3071328 | rs3092517 | rs3096644 | rs3106666 | rs3116995 | rs3124017 | rs3129817 | rs3130941 |
| rs3072094 | rs3092566 | rs3096697 | rs3106836 | rs3117006 | rs31243   | rs3129843 | rs3130968 |
| rs307359  | rs3092781 | rs3096698 | rs310749  | rs3117097 | rs3124377 | rs312985  | rs3130976 |
| rs3074190 | rs3093018 | rs3096702 | rs310755  | rs3117098 | rs3124405 | rs3129859 | rs3130991 |
| rs307558  | rs3093023 | rs3097644 | rs310763  | rs3117242 | rs3124426 | rs3129860 | rs3131018 |
| rs307575  | rs3093024 | rs3097670 | rs310796  | rs3117245 | rs3124514 | rs3129868 | rs3131043 |
| rs3076896 | rs3093030 | rs3097937 | rs3108077 | rs3117318 | rs312457  | rs3129871 | rs3131057 |
| rs3077    | rs3093059 | rs3098272 | rs3108430 | rs3117334 | rs3124592 | rs3129882 | rs3131060 |
| rs3078352 | rs3093068 | rs3098527 | rs3108680 | rs3117340 | rs3124594 | rs3129887 | rs3131064 |
| rs307913  | rs30934   | rs3098576 | rs3108962 | rs3117425 | rs3124596 | rs3129889 | rs3131085 |
| rs307914  | rs3093479 | rs3098871 | rs3109083 | rs3117426 | rs3124758 | rs3129890 | rs3131103 |
| rs3079633 | rs3093539 | rs3098950 | rs3109109 | rs3117427 | rs3124761 | rs3129891 | rs3131296 |
| rs3079637 | rs3093664 | rs3099439 | rs3109167 | rs3117582 | rs3124762 | rs3129897 | rs3131336 |
| rs3079677 | rs3093679 | rs3099557 | rs3109841 | rs3117600 | rs3124998 | rs3129900 | rs3131337 |
| rs307984  | rs3093692 | rs3099769 | rs3110081 | rs3117602 | rs31251   | rs3129934 | rs3131378 |
| rs308     | rs3093733 | rs3099844 | rs3110291 | rs3117603 | rs3125326 | rs3129939 | rs3131379 |
| rs3081219 | rs309375  | rs3100052 | rs3110417 | rs3117604 | rs3125734 | rs3129942 | rs313146  |
| rs3081227 | rs309392  | rs3100609 | rs3110493 | rs3117738 | rs3125847 | rs3129943 | rs3131560 |
| rs308202  | rs309394  | rs3101017 | rs3110494 | rs3118008 | rs3125918 | rs3129950 | rs3131586 |
| rs3083275 | rs3093988 | rs3101336 | rs3110496 | rs3118077 | rs3126085 | rs3129960 | rs3131610 |
| rs308359  | rs3094005 | rs3101338 | rs3110609 | rs3118119 | rs3126258 | rs3129962 | rs3131621 |
| rs308361  | rs3094006 | rs3101340 | rs3110628 | rs3118233 | rs312691  | rs3129977 | rs3131623 |

|           |           |             |           |           |          |          |            |
|-----------|-----------|-------------|-----------|-----------|----------|----------|------------|
| rs3131631 | rs3135359 | rs316617    | rs3190930 | rs3213758 | rs323509 | rs32940  | rs33638    |
| rs3131638 | rs3135363 | rs31674     | rs3191402 | rs3213764 | rs323610 | rs329645 | rs33674    |
| rs3131643 | rs3135364 | rs3168135   | rs31916   | rs3213787 | rs323620 | rs329648 | rs336970   |
| rs3131703 | rs3135388 | rs3169166   | rs31918   | rs3213794 | rs323726 | rs329651 | rs337100   |
| rs3131749 | rs3135394 | rs3170      | rs319277  | rs3213847 | rs323740 | rs329672 | rs337606   |
| rs3131781 | rs3135461 | rs3170167   | rs31940   | rs3213849 | rs323759 | rs329923 | rs337623   |
| rs3131856 | rs3135506 | rs317021    | rs3194051 | rs3213958 | rs323877 | rs330042 | rs337637   |
| rs3132303 | rs3135718 | rs317050    | rs319564  | rs321404  | rs324012 | rs330050 | rs337705   |
| rs3132306 | rs3135724 | rs317056    | rs3195944 | rs321406  | rs324014 | rs330054 | rs337711   |
| rs3132307 | rs3135877 | rs3170740   | rs319690  | rs3214606 | rs324017 | rs33042  | rs337718   |
| rs3132309 | rs3135890 | rs317162    | rs3197153 | rs3215395 | rs32410  | rs33063  | rs337853   |
| rs3132374 | rs3135911 | rs3171692   | rs3197597 | rs3215401 | rs32421  | rs330937 | rs337939   |
| rs3132440 | rs3135913 | rs317194    | rs3197999 | rs3215645 | rs324768 | rs330939 | rs337940   |
| rs3132451 | rs3135967 | rs3172469   | rs3198587 | rs3215853 | rs324769 | rs330942 | rs33807    |
| rs3132461 | rs3135977 | rs3172494   | rs3198697 | rs321586  | rs324775 | rs330946 | rs338070   |
| rs3132468 | rs3136247 | rs3173420   | rs320203  | rs3216008 | rs324776 | rs331    | rs33823    |
| rs3132510 | rs3136272 | rs3173615   | rs320337  | rs3216034 | rs324780 | rs331044 | rs3383     |
| rs3132524 | rs3136302 | rs3173805   | rs320369  | rs321610  | rs324801 | rs331446 | rs338364   |
| rs3132535 | rs3136354 | rs3174352   | rs3204689 | rs3216123 | rs324885 | rs331500 | rs338419   |
| rs3132556 | rs3136441 | rs3174808   | rs3205718 | rs3216233 | rs324899 | rs331949 | rs33842    |
| rs3132565 | rs3136448 | rs3175      | rs3206824 | rs3216306 | rs325    | rs332040 | rs338533   |
| rs3132580 | rs3136516 | rs3176123   | rs320696  | rs3216676 | rs3252   | rs332105 | rs338587   |
| rs3132584 | rs3136559 | rs317630    | rs320700  | rs3216778 | rs325220 | rs332117 | rs338598   |
| rs3132613 | rs3136630 | rs3176326   | rs3207555 | rs3216780 | rs3253   | rs332165 | rs339057   |
| rs3132645 | rs3136674 | rs3176336   | rs3208007 | rs3216799 | rs325384 | rs332185 | rs339095   |
| rs3132681 | rs3136739 | rs3176459   | rs3208305 | rs3217198 | rs325393 | rs332194 | rs339099   |
| rs3132682 | rs313732  | rs3176466   | rs3208787 | rs3217354 | rs325442 | rs332371 | rs33911740 |
| rs3132685 | rs313734  | rs3176471   | rs3208856 | rs3217415 | rs325485 | rs332388 | rs33912345 |
| rs3132687 | rs313741  | rs317656    | rs3209441 | rs3217673 | rs325500 | rs332389 | rs33915496 |
| rs3132940 | rs3138036 | rs317660    | rs3210043 | rs3217772 | rs325501 | rs332426 | rs33921462 |
| rs3132947 | rs3138141 | rs3176789   | rs3210186 | rs3217792 | rs325506 | rs332507 | rs33930165 |
| rs3132954 | rs3138142 | rs3176792   | rs3210400 | rs3217810 | rs32566  | rs332516 | rs33932084 |
| rs3132972 | rs3138144 | rs31768     | rs3211166 | rs3217860 | rs325712 | rs332529 | rs339331   |
| rs3133285 | rs313829  | rs317685    | rs3211620 | rs3217874 | rs32578  | rs332530 | rs339351   |
| rs3133370 | rs3138490 | rs3176878   | rs3211719 | rs3217978 | rs32579  | rs332827 | rs33941127 |
| rs3133435 | rs3138493 | rs317688    | rs3211744 | rs3217986 | rs325925 | rs332828 | rs33942080 |
| rs3133577 | rs3138512 | rs31770     | rs3211770 | rs3218036 | rs326    | rs33284  | rs33944729 |
| rs3133683 | rs314251  | rs31771     | rs3211851 | rs3218051 | rs326214 | rs333    | rs33946267 |
| rs3133731 | rs314253  | rs3177609   | rs3211931 | rs3218092 | rs326222 | rs333078 | rs33949355 |
| rs3133941 | rs314261  | rs31778     | rs3211932 | rs3218097 | rs326341 | rs333288 | rs33951980 |
| rs3133974 | rs314262  | rs3177928   | rs3211938 | rs3218116 | rs32658  | rs333613 | rs33954106 |
| rs3134012 | rs314263  | rs3178327   | rs3211958 | rs3218160 | rs326845 | rs333891 | rs33954608 |
| rs3134095 | rs314276  | rs317911    | rs3211960 | rs3218164 | rs327    | rs333947 | rs33957528 |
| rs3134133 | rs314277  | rs3179865   | rs3211995 | rs3218192 | rs327098 | rs334    | rs33958791 |
| rs3134353 | rs314280  | rs3180018   | rs3212018 | rs3218221 | rs327102 | rs33429  | rs33959228 |
| rs3134358 | rs314281  | rs3180279   | rs3212240 | rs3218248 | rs327200 | rs33431  | rs33959421 |
| rs3134605 | rs314283  | rs3180509   | rs3212308 | rs3218251 | rs327636 | rs334353 | rs33959428 |
| rs3134693 | rs314289  | rs3180887   | rs321232  | rs3218455 | rs327712 | rs334354 | rs33959587 |
| rs3134745 | rs314311  | rs318095    | rs3212350 | rs3218477 | rs327716 | rs33439  | rs33964027 |
| rs3134792 | rs314313  | rs3181077   | rs3212371 | rs3218502 | rs32793  | rs334563 | rs33966350 |
| rs3134900 | rs314349  | rs3181215   | rs3212880 | rs3219104 | rs328    | rs334699 | rs33966734 |
| rs3134906 | rs314370  | rs3181238   | rs3212891 | rs3219175 | rs328301 | rs334725 | rs33968174 |
| rs3134931 | rs314460  | rs3181269   | rs3213094 | rs3219489 | rs328491 | rs334782 | rs33969048 |
| rs3134942 | rs314478  | rs3181348   | rs3213122 | rs322     | rs32881  | rs33485  | rs33969351 |
| rs3134945 | rs31465   | rs31837     | rs3213180 | rs322144  | rs3289   | rs335171 | rs33972805 |
| rs3134950 | rs314675  | rs3184470   | rs3213225 | rs322329  | rs328902 | rs335206 | rs33980500 |
| rs3134954 | rs31487   | rs3184504   | rs3213250 | rs322351  | rs328996 | rs335214 | rs33981001 |
| rs3134963 | rs314879  | rs318473    | rs3213282 | rs322353  | rs329007 | rs335424 | rs33984059 |
| rs3134986 | rs31489   | rs318481    | rs3213545 | rs322396  | rs329117 | rs335426 | rs33984773 |
| rs3134995 | rs31490   | rs318493    | rs3213567 | rs322458  | rs329118 | rs335433 | rs33988101 |
| rs3135001 | rs315145  | rs3185010   | rs3213572 | rs322614  | rs329120 | rs335629 | rs33988592 |
| rs3135002 | rs3152    | rs3185378   | rs3213591 | rs322692  | rs329121 | rs335650 | rs33995560 |
| rs3135044 | rs316009  | rs31864     | rs3213636 | rs322744  | rs329122 | rs33590  | rs33996239 |
| rs3135063 | rs316019  | rs318735    | rs3213658 | rs322776  | rs329124 | rs33599  | rs339969   |
| rs3135064 | rs316020  | rs3187964   | rs3213661 | rs323167  | rs329125 | rs336033 | rs33998475 |
| rs3135296 | rs31612   | rs3189030-A | rs3213716 | rs323169  | rs329272 | rs336247 | rs33998651 |
| rs3135338 | rs316341  | rs3190923   | rs3213737 | rs323299  | rs329319 | rs336248 | rs339995   |

|            |            |            |            |            |            |            |            |
|------------|------------|------------|------------|------------|------------|------------|------------|
| rs339998   | rs34039593 | rs34083426 | rs34128150 | rs34179455 | rs34218707 | rs34249834 | rs342989   |
| rs34000    | rs340397   | rs340839   | rs34128886 | rs34180096 | rs34219605 | rs34252038 | rs34298980 |
| rs34000440 | rs34039852 | rs34084772 | rs34129834 | rs34180132 | rs34220678 | rs34254072 | rs343      |
| rs340005   | rs34040779 | rs340849   | rs34130368 | rs34180494 | rs34220720 | rs34254518 | rs34301845 |
| rs34000926 | rs34040804 | rs34084957 | rs34131062 | rs34180575 | rs34221241 | rs34255408 | rs34302357 |
| rs340025   | rs34041421 | rs34086233 | rs34131245 | rs34181358 | rs342213   | rs34255979 | rs34303684 |
| rs34002682 | rs34042070 | rs340874   | rs34133263 | rs34181610 | rs34221642 | rs342563   | rs34304273 |
| rs34002784 | rs34042186 | rs34088420 | rs341338   | rs34182778 | rs34221980 | rs34257361 | rs34305371 |
| rs340029   | rs34042385 | rs34089598 | rs34133817 | rs34182956 | rs342221   | rs34257409 | rs343057   |
| rs340030   | rs34042421 | rs34090858 | rs34134374 | rs34183224 | rs34222435 | rs34258073 | rs34305872 |
| rs34003015 | rs34042475 | rs34091203 | rs34135146 | rs34183666 | rs34223321 | rs34258265 | rs34306087 |
| rs34003290 | rs34043159 | rs34091558 | rs34136481 | rs34184414 | rs34223626 | rs34259390 | rs343064   |
| rs34004019 | rs34043654 | rs34091656 | rs34136796 | rs34184867 | rs34223701 | rs34259616 | rs34307719 |
| rs34004493 | rs34044188 | rs34091862 | rs34138141 | rs34184910 | rs342242   | rs34259893 | rs34308190 |
| rs34005289 | rs34045288 | rs34091987 | rs34138206 | rs34186074 | rs34224566 | rs34260097 | rs343086   |
| rs34005590 | rs34045601 | rs340934   | rs34138479 | rs34186148 | rs34224666 | rs34261036 | rs34309    |
| rs34005627 | rs34046483 | rs34093919 | rs34138930 | rs34186890 | rs34226052 | rs34262244 | rs343092   |
| rs34005895 | rs34050011 | rs34095326 | rs34138960 | rs34186918 | rs34226255 | rs34262657 | rs34309238 |
| rs34006614 | rs34052104 | rs34095745 | rs34141697 | rs34187268 | rs34226552 | rs34265141 | rs34309753 |
| rs34006916 | rs34052773 | rs34096175 | rs34142155 | rs34187696 | rs342275   | rs34265667 | rs34310778 |
| rs34006994 | rs34052812 | rs34096281 | rs34143602 | rs34188294 | rs342287   | rs34265761 | rs34311235 |
| rs34008669 | rs34053174 | rs34096978 | rs34143604 | rs34191159 | rs34228820 | rs34265962 | rs34311866 |
| rs34008761 | rs34054660 | rs34097030 | rs34144801 | rs34192341 | rs34229152 | rs34266312 | rs34311906 |
| rs34009962 | rs340561   | rs34097149 | rs34145995 | rs34192637 | rs342292   | rs34268928 | rs34312154 |
| rs34010125 | rs34057264 | rs34097386 | rs34148222 | rs34192788 | rs342293   | rs34269292 | rs34312547 |
| rs34010237 | rs34058206 | rs34097461 | rs34148588 | rs34193069 | rs342294   | rs34269469 | rs34312605 |
| rs34011394 | rs34059679 | rs34097845 | rs34148685 | rs341937   | rs342295   | rs34269793 | rs34313099 |
| rs34011672 | rs340600   | rs34098770 | rs34149579 | rs34194998 | rs342296   | rs34269918 | rs34314    |
| rs34012755 | rs34060248 | rs34099733 | rs34149660 | rs34195470 | rs342299   | rs342702   | rs34314354 |
| rs34013988 | rs34060476 | rs34101855 | rs34149821 | rs34196215 | rs34229995 | rs342706   | rs34316    |
| rs34015134 | rs34061204 | rs34102154 | rs34150222 | rs34196306 | rs34230287 | rs34270626 | rs34316274 |
| rs34016308 | rs34061361 | rs34102936 | rs341504   | rs34197769 | rs34231037 | rs34271465 | rs34316562 |
| rs34016701 | rs34061534 | rs34103191 | rs341508   | rs34197800 | rs34232196 | rs34276187 | rs34317    |
| rs34018670 | rs34061913 | rs341038   | rs34151584 | rs34198449 | rs34232231 | rs34276468 | rs34317837 |
| rs34019140 | rs34062580 | rs34104395 | rs34151819 | rs34200313 | rs34232444 | rs34277166 | rs34318965 |
| rs34020101 | rs340630   | rs34104805 | rs341521   | rs34200710 | rs34233420 | rs34277475 | rs34319926 |
| rs34020413 | rs34063378 | rs34105297 | rs34153025 | rs34201467 | rs34233878 | rs34281554 | rs34320230 |
| rs34021161 | rs34063670 | rs34105345 | rs34154818 | rs34202026 | rs34234296 | rs34282584 | rs34320498 |
| rs34022431 | rs340637   | rs34106693 | rs34155847 | rs34202212 | rs34234656 | rs34283568 | rs34320898 |
| rs34022779 | rs34064757 | rs34107459 | rs34156328 | rs34203781 | rs34234711 | rs34284056 | rs34321437 |
| rs34023161 | rs34065661 | rs34107769 | rs34156428 | rs34204798 | rs34234989 | rs34284209 | rs34322    |
| rs34024632 | rs34067374 | rs34108746 | rs34156429 | rs34205992 | rs34236350 | rs34285816 | rs34322452 |
| rs34025077 | rs34067381 | rs34112166 | rs34158728 | rs34206285 | rs34237612 | rs3428592  | rs34322845 |
| rs34025316 | rs34067580 | rs34112413 | rs34158769 | rs34207738 | rs34237618 | rs34286836 | rs34322928 |
| rs34025520 | rs34069391 | rs34113929 | rs34160346 | rs34208226 | rs34239319 | rs34287    | rs34324    |
| rs34025766 | rs34070242 | rs34114713 | rs34160920 | rs34208856 | rs34240339 | rs34287227 | rs34324145 |
| rs34025894 | rs34070447 | rs34115320 | rs34161718 | rs34208856 | rs34240669 | rs34288539 | rs34324219 |
| rs34026587 | rs34070949 | rs34116314 | rs34161789 | rs34210653 | rs34241101 | rs34289079 | rs34324867 |
| rs34026809 | rs34071646 | rs34116853 | rs34162196 | rs34211052 | rs34241101 | rs34289250 | rs34324915 |
| rs34028053 | rs34071734 | rs34117943 | rs34163044 | rs34211119 | rs34241305 | rs34289250 | rs34324925 |
| rs34028624 | rs34071855 | rs34118017 | rs34164109 | rs34212866 | rs34242338 | rs34289553 | rs34324971 |
| rs34028848 | rs34072608 | rs34119086 | rs34164888 | rs342130   | rs34242364 | rs34290285 | rs34324971 |
| rs34029390 | rs34072724 | rs34119086 | rs34164888 | rs34213683 | rs34242990 | rs34290760 | rs34325    |
| rs34030778 | rs34072724 | rs34119525 | rs34165383 | rs34213753 | rs34243039 | rs34291892 | rs34325511 |
| rs34030812 | rs34072752 | rs34119551 | rs34166467 | rs34214423 | rs342437   | rs34292685 | rs34326966 |
| rs34030880 | rs34073492 | rs34119581 | rs34166561 | rs34214527 | rs34244947 | rs34292822 | rs34327    |
| rs34031061 | rs34074270 | rs34120329 | rs34166762 | rs34214571 | rs34245505 | rs34293316 | rs34328494 |
| rs34031601 | rs34074875 | rs34121753 | rs34171147 | rs34214868 | rs34245511 | rs34293609 | rs34328549 |
| rs34032610 | rs34075341 | rs34121855 | rs34172480 | rs34215066 | rs34245545 | rs34293785 | rs34328930 |
| rs34032897 | rs340762   | rs34121942 | rs34172651 | rs34215892 | rs34245846 | rs34294937 | rs34329895 |
| rs34034915 | rs34077344 | rs34122915 | rs34172963 | rs34215985 | rs34246082 | rs34295474 | rs34329963 |
| rs34036083 | rs34077745 | rs34123233 | rs34172992 | rs34216058 | rs34246472 | rs34296038 | rs34330    |
| rs34036147 | rs34078361 | rs34124816 | rs34173062 | rs34216151 | rs342467   | rs34296249 | rs34330476 |
| rs34038797 | rs34078567 | rs34124863 | rs34177026 | rs34216340 | rs34246861 | rs34297248 | rs34331204 |
| rs34038917 | rs34080181 | rs34125199 | rs34177044 | rs34216521 | rs34247110 | rs34297856 | rs34331965 |
| rs34038940 | rs34080972 | rs34125516 | rs34178379 | rs34216701 | rs34247753 | rs34298584 | rs34331968 |
| rs34039488 | rs34081316 | rs34127110 | rs341785   | rs34217484 | rs34248373 | rs342988   | rs34331990 |
|            | rs34081637 | rs34127175 | rs34178687 | rs34217772 | rs34248912 | rs34298851 | rs34332679 |

|            |            |            |            |            |            |            |            |
|------------|------------|------------|------------|------------|------------|------------|------------|
| rs34333163 | rs34380167 | rs34427075 | rs34477738 | rs34536858 | rs34579442 | rs34623288 | rs34658078 |
| rs34334323 | rs343812   | rs34427173 | rs34477782 | rs34538000 | rs34580448 | rs34623301 | rs34658409 |
| rs34335526 | rs34382015 | rs34427491 | rs34479964 | rs34538877 | rs34580810 | rs34623699 | rs346588   |
| rs34336071 | rs34382598 | rs34429926 | rs34480284 | rs34539062 | rs34581681 | rs346240   | rs346592   |
| rs34337122 | rs34382739 | rs34430548 | rs34480822 | rs34539187 | rs34582191 | rs34624408 | rs34659651 |
| rs34338164 | rs343829   | rs34430710 | rs34480931 | rs34539435 | rs34582942 | rs34624527 | rs34660448 |
| rs34339006 | rs34383631 | rs34430945 | rs34481141 | rs34540877 | rs34583040 | rs34624793 | rs34661125 |
| rs34339117 | rs343849   | rs34433004 | rs344812   | rs34542080 | rs34583478 | rs34625560 | rs34661691 |
| rs34339938 | rs34385891 | rs34433793 | rs34481890 | rs34542489 | rs34584018 | rs34626661 | rs34662054 |
| rs34340407 | rs34386017 | rs34435227 | rs34482346 | rs34542531 | rs34584161 | rs34627    | rs34662244 |
| rs34340810 | rs34386380 | rs34435647 | rs34483452 | rs34542576 | rs34584334 | rs34628728 | rs34664    |
| rs34341    | rs34387644 | rs34436026 | rs34483751 | rs34544423 | rs34587452 | rs34629349 | rs34664047 |
| rs34341044 | rs34388845 | rs34436644 | rs34487851 | rs34544996 | rs34587586 | rs34629622 | rs34664079 |
| rs34341922 | rs34389480 | rs34436714 | rs34488670 | rs34545342 | rs34587622 | rs34630031 | rs34664138 |
| rs34342129 | rs34390044 | rs34437050 | rs34489224 | rs34546498 | rs34588274 | rs34631529 | rs34664882 |
| rs34342646 | rs34390319 | rs34437079 | rs34490121 | rs34548043 | rs34588551 | rs34631598 | rs34664889 |
| rs34343198 | rs34390431 | rs34437781 | rs34490570 | rs34548197 | rs34588821 | rs34631960 | rs34666276 |
| rs34343821 | rs34390795 | rs34438057 | rs34490907 | rs34548930 | rs34589210 | rs34632254 | rs34667100 |
| rs34344642 | rs34392107 | rs34438249 | rs34492353 | rs34550543 | rs34591112 | rs34632394 | rs34668346 |
| rs34344826 | rs34394051 | rs34439695 | rs34495    | rs34550591 | rs34591181 | rs34633411 | rs34668726 |
| rs34344888 | rs34394231 | rs34440547 | rs34495106 | rs34552401 | rs34591253 | rs34634095 | rs34670419 |
| rs34345560 | rs34397770 | rs34440628 | rs34495436 | rs34553872 | rs34591516 | rs34634548 | rs34670443 |
| rs34346379 | rs343949   | rs34441268 | rs34496773 | rs34553878 | rs34591978 | rs34635    | rs34670506 |
| rs34346558 | rs34395537 | rs34445740 | rs34497506 | rs34554744 | rs34592089 | rs34635363 | rs34670647 |
| rs34346645 | rs34396314 | rs34445998 | rs34499031 | rs34555420 | rs34592828 | rs34635462 | rs34671475 |
| rs34346867 | rs34396520 | rs34447302 | rs34500    | rs34555832 | rs34593439 | rs34635504 | rs34674487 |
| rs343473   | rs34396633 | rs34447435 | rs34500063 | rs34556183 | rs34594059 | rs34635744 | rs34675278 |
| rs343476   | rs343968   | rs34447926 | rs34500224 | rs34556611 | rs34594435 | rs34636594 | rs34675318 |
| rs343478   | rs34397747 | rs34448954 | rs34503352 | rs34556895 | rs34595852 | rs34637584 | rs34675408 |
| rs34349689 | rs343994   | rs34449214 | rs34503709 | rs34557236 | rs34597048 | rs34637964 | rs346757   |
| rs34350610 | rs34399458 | rs3445     | rs34505104 | rs34557412 | rs34597645 | rs34638591 | rs34676223 |
| rs34351088 | rs34399476 | rs34451538 | rs34506349 | rs34557926 | rs34598164 | rs34638654 | rs346763   |
| rs34351630 | rs34399632 | rs34451818 | rs34507830 | rs34559316 | rs345985   | rs34638686 | rs34676687 |
| rs34351848 | rs34400020 | rs34452566 | rs34509057 | rs34559440 | rs34598529 | rs34638952 | rs34676698 |
| rs34352176 | rs34400381 | rs34452960 | rs34509141 | rs34560261 | rs34599082 | rs34640359 | rs34678053 |
| rs34352510 | rs34401930 | rs34452993 | rs34509786 | rs34560923 | rs34599909 | rs34640360 | rs34678368 |
| rs34352794 | rs344024   | rs34453673 | rs34509802 | rs34561714 | rs34600126 | rs34641928 | rs3468     |
| rs34354040 | rs34403018 | rs34453858 | rs34510004 | rs34561875 | rs34601376 | rs34642    | rs34680120 |
| rs34354104 | rs34404554 | rs34454109 | rs34510405 | rs34562254 | rs34602454 | rs34642455 | rs34681481 |
| rs34355066 | rs34404753 | rs34454320 | rs34511467 | rs34562262 | rs34603233 | rs34642578 | rs34681760 |
| rs34356419 | rs34405347 | rs34454426 | rs34511941 | rs34563280 | rs34603396 | rs34642662 | rs346835   |
| rs34356467 | rs34406510 | rs34454966 | rs34514836 | rs34563311 | rs34603401 | rs34642857 | rs34683740 |
| rs34356831 | rs34406563 | rs344560   | rs34514973 | rs34564463 | rs34604401 | rs34643605 | rs34684276 |
| rs34356918 | rs344078   | rs34456333 | rs34515576 | rs34564655 | rs34605102 | rs34644694 | rs34686164 |
| rs34357008 | rs344081   | rs34457140 | rs34516251 | rs34564977 | rs34606703 | rs34644791 | rs34686587 |
| rs34357090 | rs344083   | rs34459162 | rs34516933 | rs34565004 | rs346068   | rs34645101 | rs34687052 |
| rs34357723 | rs34409187 | rs34459814 | rs34517207 | rs34565142 | rs346073   | rs34645479 | rs34687215 |
| rs34360    | rs34409923 | rs34460487 | rs34517439 | rs34565370 | rs34607745 | rs34646035 | rs34687269 |
| rs34361    | rs34410    | rs34460569 | rs34517613 | rs34568880 | rs34608    | rs34646035 | rs34687326 |
| rs34363155 | rs34410689 | rs34463936 | rs34517663 | rs34568892 | rs34610286 | rs34647824 | rs34687326 |
| rs34363414 | rs34413141 | rs34464850 | rs34517852 | rs34569203 | rs34611    | rs34647936 | rs34687569 |
| rs34363861 | rs34414056 | rs344650   | rs34518086 | rs34570306 | rs34611049 | rs34648    | rs34689332 |
| rs34365165 | rs34414349 | rs34465541 | rs34518736 | rs34571451 | rs34611728 | rs34649675 | rs34690033 |
| rs34366173 | rs34414754 | rs34466956 | rs34518860 | rs34571768 | rs34613202 | rs346508   | rs34691181 |
| rs34366705 | rs34415150 | rs34467919 | rs34521402 | rs34572839 | rs34613612 | rs34651    | rs34694416 |
| rs34367533 | rs34415530 | rs34467936 | rs34522012 | rs34572943 | rs34614532 | rs346522   | rs34694866 |
| rs34370185 | rs34415768 | rs34468415 | rs34523089 | rs34573045 | rs34614773 | rs34652660 | rs34695471 |
| rs34370440 | rs34416364 | rs344687   | rs34524896 | rs345736   | rs34614995 | rs34652781 | rs34695601 |
| rs34370846 | rs34416903 | rs34468831 | rs34528081 | rs34573869 | rs34615715 | rs34653192 | rs34695944 |
| rs34372369 | rs34417222 | rs344693   | rs34528912 | rs34574525 | rs34615736 | rs34654885 | rs34696181 |
| rs34372695 | rs34417600 | rs34469351 | rs345297   | rs34574566 | rs34615879 | rs34654942 | rs34696509 |
| rs34372836 | rs34418941 | rs34470277 | rs34531385 | rs34575204 | rs34616741 | rs34655123 | rs34697127 |
| rs34373881 | rs34419890 | rs34470581 | rs34533962 | rs34575265 | rs34617913 | rs34655126 | rs34698639 |
| rs34375271 | rs34421088 | rs34471628 | rs34534844 | rs34578041 | rs34618286 | rs34655300 | rs34698825 |
| rs34375635 | rs34421297 | rs34471784 | rs34536198 | rs34578339 | rs34619    | rs34656141 | rs34699    |
| rs34377763 | rs34426467 | rs34476593 | rs34536443 | rs34579268 | rs34619169 | rs34656657 | rs34699899 |
| rs34378330 | rs34426618 | rs34477097 | rs34536594 | rs34579290 | rs34621310 | rs34657012 | rs34700861 |
|            |            |            |            |            |            | rs34657911 | rs34701787 |



|            |            |            |            |            |            |            |            |
|------------|------------|------------|------------|------------|------------|------------|------------|
| rs34702488 | rs34754113 | rs34792580 | rs34836421 | rs34881399 | rs34933611 | rs34977459 | rs35018800 |
| rs34704    | rs34754277 | rs34793310 | rs34838577 | rs34881728 | rs34933909 | rs34977907 | rs35018855 |
| rs34705151 | rs347551   | rs34794623 | rs34838763 | rs34884023 | rs34934281 | rs34978076 | rs35018941 |
| rs34705275 | rs34756862 | rs34794906 | rs34839878 | rs34884217 | rs349345   | rs34978289 | rs35020077 |
| rs34705855 | rs34757410 | rs34795510 | rs34840245 | rs34884906 | rs34934920 | rs34978822 | rs35020541 |
| rs34706136 | rs34759087 | rs34796300 | rs34840745 | rs34884999 | rs34935520 | rs34979551 | rs35020808 |
| rs34706883 | rs347591   | rs34796896 | rs34841551 | rs34885610 | rs349356   | rs34979631 | rs35021474 |
| rs34708625 | rs34759135 | rs34796998 | rs34841991 | rs34886151 | rs34935660 | rs34980052 | rs35021943 |
| rs34710064 | rs34760444 | rs34797592 | rs34845373 | rs34886460 | rs349359   | rs34980849 | rs35022307 |
| rs34711194 | rs34761529 | rs34797640 | rs34845616 | rs34887403 | rs34936342 | rs34981078 | rs35024086 |
| rs34712273 | rs34761644 | rs34797797 | rs34846236 | rs34888828 | rs34936836 | rs34983651 | rs350251   |
| rs34712979 | rs34761731 | rs34798274 | rs34846688 | rs34888832 | rs34937552 | rs34983854 | rs35025195 |
| rs34714188 | rs34761973 | rs34799682 | rs34848191 | rs34889159 | rs34937911 | rs34985304 | rs35026308 |
| rs34714364 | rs34762051 | rs34800162 | rs34848742 | rs34889187 | rs34939651 | rs34985965 | rs35026726 |
| rs34714686 | rs34762579 | rs34801597 | rs34849029 | rs34889541 | rs34939984 | rs34986765 | rs35026927 |
| rs34715063 | rs34762852 | rs34801745 | rs34849253 | rs34890793 | rs34940191 | rs34987019 | rs35028061 |
| rs34715615 | rs34762923 | rs34802460 | rs348495   | rs34890846 | rs34940240 | rs34987743 | rs350281   |
| rs34716573 | rs34764015 | rs34803179 | rs34850578 | rs34891368 | rs34940374 | rs34990153 | rs35028368 |
| rs34716983 | rs34765661 | rs34804116 | rs34850939 | rs34891900 | rs34940743 | rs34990159 | rs35028939 |
| rs34717228 | rs347661   | rs34804482 | rs34851490 | rs34893217 | rs34941092 | rs34990336 | rs35030093 |
| rs34717629 | rs34766442 | rs34805060 | rs34851999 | rs34894420 | rs34942359 | rs34991172 | rs35030851 |
| rs34717889 | rs34767118 | rs34805185 | rs34852333 | rs34894487 | rs34942426 | rs34991606 | rs35031042 |
| rs34718559 | rs34767236 | rs34806615 | rs34853064 | rs34894639 | rs34943133 | rs34991781 | rs35031873 |
| rs34720006 | rs34768269 | rs34806762 | rs34855406 | rs34895689 | rs34944131 | rs34991888 | rs35031964 |
| rs34720245 | rs347685   | rs34807077 | rs34855922 | rs34896088 | rs34945223 | rs34991912 | rs35032408 |
| rs34720381 | rs34768785 | rs34809912 | rs34856868 | rs34897497 | rs34947566 | rs34991987 | rs35032874 |
| rs34721455 | rs34769088 | rs34811474 | rs34857077 | rs34898535 | rs34949187 | rs34992808 | rs35033136 |
| rs34722008 | rs34769775 | rs34813495 | rs34857974 | rs34900354 | rs34950321 | rs34993178 | rs35033748 |
| rs34722895 | rs34770253 | rs34813609 | rs34858520 | rs34900740 | rs34950733 | rs34994596 | rs35034355 |
| rs34723276 | rs34770628 | rs34813910 | rs34858588 | rs34903090 | rs34951274 | rs34994986 | rs35037868 |
| rs34723331 | rs34770920 | rs34814382 | rs34858804 | rs349045   | rs34952285 | rs34995648 | rs35038739 |
| rs34723659 | rs34771269 | rs34815962 | rs34861192 | rs34904684 | rs34952318 | rs34997829 | rs35039172 |
| rs34725069 | rs34772376 | rs34817112 | rs34861762 | rs34905321 | rs34953090 | rs34997977 | rs35039341 |
| rs34725611 | rs34773007 | rs34817779 | rs34862067 | rs34906439 | rs34954997 | rs35000415 | rs35039375 |
| rs34726119 | rs34773350 | rs34818942 | rs34862123 | rs34906836 | rs34955534 | rs35000814 | rs35040684 |
| rs34726834 | rs34774090 | rs34818954 | rs34862421 | rs349071   | rs34955778 | rs35001362 | rs35040843 |
| rs347272   | rs34774377 | rs34819186 | rs34862454 | rs34907385 | rs34956586 | rs35003605 | rs35041402 |
| rs34727469 | rs34775014 | rs348196   | rs34863300 | rs34907608 | rs34956804 | rs35003893 | rs35041900 |
| rs34728056 | rs34775460 | rs34820711 | rs34864022 | rs34908328 | rs34958196 | rs35004261 | rs35042034 |
| rs34728133 | rs34776209 | rs34821177 | rs34864445 | rs34908430 | rs34958982 | rs35004449 | rs35042446 |
| rs34729    | rs34777570 | rs34821335 | rs34864796 | rs34908476 | rs34961350 | rs35004890 | rs35043490 |
| rs34731055 | rs34778241 | rs34823076 | rs34866095 | rs349088   | rs34961555 | rs35005436 | rs35043804 |
| rs347313   | rs34778348 | rs34823645 | rs34866621 | rs34912216 | rs34962991 | rs35006008 | rs35043843 |
| rs34731408 | rs34778574 | rs34825241 | rs34866937 | rs34912238 | rs34963268 | rs35006130 | rs35045014 |
| rs34731969 | rs34778589 | rs34825443 | rs34868291 | rs34914463 | rs34963977 | rs35006844 | rs35045881 |
| rs34732995 | rs34779708 | rs34825470 | rs34868542 | rs34914771 | rs34964486 | rs35006907 | rs35048193 |
| rs34733715 | rs34780507 | rs34825628 | rs34869    | rs34914832 | rs34965774 | rs35007880 | rs35049342 |
| rs34734335 | rs34780702 | rs348258   | rs34869093 | rs34914954 | rs34966560 | rs35008345 | rs35049778 |
| rs34734847 | rs34780912 | rs34825830 | rs34872471 | rs34916030 | rs34967069 | rs35008691 | rs35051311 |
| rs34737303 | rs34781    | rs34826479 | rs34872474 | rs34916901 | rs34967082 | rs35009641 | rs35051342 |
| rs347413   | rs34781085 | rs34826779 | rs34872892 | rs34917861 | rs34967119 | rs35011184 | rs35052883 |
| rs34742008 | rs34782298 | rs34827544 | rs34874107 | rs34919878 | rs34967120 | rs35011283 | rs35054791 |
| rs34744311 | rs34782622 | rs348276   | rs34874378 | rs34920465 | rs34968716 | rs35011804 | rs35054928 |
| rs34744948 | rs34782870 | rs34827707 | rs34875023 | rs34920939 | rs34968964 | rs35012435 | rs35055419 |
| rs34745815 | rs34783010 | rs34829163 | rs34875178 | rs34922454 | rs34969    | rs35012806 | rs35056343 |
| rs34745873 | rs34783466 | rs34830321 | rs34875688 | rs34923414 | rs34969716 | rs35012903 | rs35056722 |
| rs34746747 | rs34784490 | rs34830788 | rs34877519 | rs34923683 | rs34970111 | rs35013231 | rs35057862 |
| rs34746889 | rs34786000 | rs34831171 | rs34877957 | rs34924059 | rs34970894 | rs35014268 | rs35057908 |
| rs34748029 | rs34786826 | rs34831515 | rs34877991 | rs34924388 | rs34971252 | rs35014541 | rs35058689 |
| rs34748838 | rs34787105 | rs34831921 | rs34878803 | rs34925593 | rs34972443 | rs35014657 | rs35060063 |
| rs34749125 | rs34787248 | rs34832585 | rs34879158 | rs34927946 | rs34972666 | rs35016036 | rs35060985 |
| rs34749698 | rs34787918 | rs348330   | rs34879232 | rs34929759 | rs34972832 | rs35016816 | rs35061193 |
| rs34750263 | rs34788172 | rs34834004 | rs34879831 | rs34930172 | rs34973462 | rs35017113 | rs35061496 |
| rs34750410 | rs34788230 | rs34834119 | rs34880628 | rs34930419 | rs34974290 | rs35017208 | rs35061832 |
| rs34750569 | rs3478903  | rs34834842 | rs34880821 | rs349306   | rs34974495 | rs35017470 | rs35062406 |
| rs347519   | rs34791043 | rs34835598 | rs348809   | rs34931195 | rs34976449 | rs35017964 | rs35062987 |
| rs34753522 | rs34791963 | rs34836    | rs34881325 | rs34931250 | rs34976846 | rs35018144 | rs35063026 |

|            |            |            |            |            |            |            |             |
|------------|------------|------------|------------|------------|------------|------------|-------------|
| rs35063109 | rs35108541 | rs35148850 | rs35193668 | rs35233301 | rs35284775 | rs35327499 | rs35370188  |
| rs35065479 | rs35110063 | rs35148853 | rs35194383 | rs35233638 | rs35285321 | rs35329209 | rs35371013  |
| rs35066740 | rs351101   | rs35149360 | rs35194449 | rs35233997 | rs35285455 | rs35330522 | rs35372182  |
| rs35067979 | rs35110281 | rs35149731 | rs35194537 | rs35234337 | rs35285683 | rs35332062 | rs35373084  |
| rs35068223 | rs35110517 | rs35150201 | rs35194812 | rs35236676 | rs35286154 | rs35333770 | rs35374532  |
| rs35068491 | rs35110721 | rs35150875 | rs35195    | rs35237252 | rs35286446 | rs353339   | rs35374984  |
| rs35069269 | rs35110958 | rs35151606 | rs35195586 | rs35237755 | rs35286811 | rs35333999 | rs35375032  |
| rs35069969 | rs351111   | rs35152618 | rs35196838 | rs35237909 | rs35286975 | rs35335033 | rs35375873  |
| rs35070799 | rs35111506 | rs35152987 | rs351973   | rs35240333 | rs35287272 | rs35335867 | rs35377646  |
| rs35071165 | rs35112940 | rs35153287 | rs351976   | rs35240997 | rs35287509 | rs35336243 | rs35377660  |
| rs35072105 | rs35113840 | rs35154032 | rs35198068 | rs35242582 | rs35287743 | rs35337335 | rs35380582  |
| rs350729   | rs35114152 | rs35154268 | rs35198725 | rs35246381 | rs35287888 | rs35337422 | rs35381162  |
| rs35074907 | rs35115269 | rs35154409 | rs351988   | rs35246838 | rs35288294 | rs35340377 | rs35381200  |
| rs35075866 | rs35115423 | rs35154717 | rs35199222 | rs35246909 | rs35289216 | rs35342371 | rs35383270  |
| rs35076622 | rs35115993 | rs35155027 | rs35199395 | rs35249079 | rs35290534 | rs35342892 | rs35383388  |
| rs35077430 | rs35116560 | rs35156457 | rs35199438 | rs35249183 | rs35292035 | rs35343344 | rs35383942  |
| rs35079125 | rs35118033 | rs35157100 | rs351995   | rs35250297 | rs35292876 | rs35343437 | rs35384579  |
| rs35079454 | rs35118522 | rs35157500 | rs35200015 | rs35251008 | rs35293660 | rs35344256 | rs35388001  |
| rs35079605 | rs35119396 | rs35158675 | rs35201538 | rs35251247 | rs35295665 | rs35344466 | rs35388084  |
| rs35080475 | rs35119871 | rs35158734 | rs35202981 | rs35251378 | rs35297201 | rs35344761 | rs353884    |
| rs35081008 | rs35119987 | rs35158985 | rs35203608 | rs35251485 | rs35297613 | rs35344864 | rs353891    |
| rs35081743 | rs35120633 | rs35161626 | rs35204956 | rs35251997 | rs353      | rs35345753 | rs35389258  |
| rs350818   | rs35121057 | rs35162296 | rs35205878 | rs35254359 | rs35300112 | rs35346340 | rs35389394  |
| rs35081913 | rs35122479 | rs35162472 | rs35206230 | rs35254404 | rs35300242 | rs35346733 | rs35390852  |
| rs35081954 | rs35122942 | rs35163651 | rs35206989 | rs35255016 | rs35301188 | rs353474   | rs35391     |
| rs350823   | rs351237   | rs35164067 | rs35207189 | rs35255138 | rs35301423 | rs35348663 | rs35391898  |
| rs35082390 | rs351242   | rs35164294 | rs35207557 | rs35255404 | rs35301716 | rs353490   | rs35391917  |
| rs35082559 | rs35124400 | rs35164803 | rs35209475 | rs35255819 | rs35303804 | rs35349053 | rs35392886  |
| rs35082717 | rs35124509 | rs35166255 | rs35210477 | rs35256080 | rs35304300 | rs35349146 | rs35392904  |
| rs35084376 | rs35124980 | rs35167234 | rs35212593 | rs35256261 | rs35305150 | rs35349325 | rs35393419  |
| rs35084382 | rs35125553 | rs35168133 | rs352126   | rs35256947 | rs35305377 | rs35349669 | rs35394392  |
| rs35085068 | rs35127411 | rs35169606 | rs35213086 | rs35257667 | rs35306388 | rs35350651 | rs35394453  |
| rs35086835 | rs35129652 | rs35169799 | rs35213789 | rs35258073 | rs35306767 | rs35351529 | rs35394656  |
| rs35087390 | rs35130225 | rs35173156 | rs352140   | rs35258156 | rs35307761 | rs35351985 | rs35394824  |
| rs35087492 | rs35130743 | rs35173225 | rs35214871 | rs35258188 | rs35307904 | rs35352013 | rs35395     |
| rs35087650 | rs35130793 | rs35174414 | rs35215132 | rs35258872 | rs35308216 | rs35352112 | rs35395347  |
| rs35088218 | rs35131895 | rs35175632 | rs35215502 | rs35259020 | rs35308250 | rs35352346 | rs35395352  |
| rs350889   | rs35132512 | rs35175834 | rs35216196 | rs35260072 | rs35309068 | rs35352645 | rs35396326  |
| rs35090721 | rs35132791 | rs35176054 | rs35218683 | rs35261357 | rs35311109 | rs35352848 | rs35397     |
| rs350908   | rs35134    | rs35176381 | rs35219418 | rs35261542 | rs35311556 | rs35353426 | rs35397738  |
| rs35090903 | rs35134647 | rs35177116 | rs35219595 | rs35261719 | rs353116   | rs353547   | rs35397826  |
| rs350912   | rs35135458 | rs35179000 | rs35221132 | rs35264875 | rs35311767 | rs35354907 | rs35398779  |
| rs35091253 | rs351364   | rs35179196 | rs35221880 | rs35264941 | rs35311980 | rs35355140 | rs35399441  |
| rs35091490 | rs35136575 | rs35179352 | rs35221977 | rs35265117 | rs35313529 | rs35355295 | rs3540      |
| rs35091702 | rs35136921 | rs35181    | rs35222429 | rs35267052 | rs35313547 | rs35355673 | rs35400166  |
| rs35092495 | rs35136957 | rs35182026 | rs35222808 | rs35267182 | rs35315125 | rs35358275 | rs35401268  |
| rs35093463 | rs351370   | rs35182096 | rs35223184 | rs35267807 | rs35316276 | rs35358414 | rs35402690  |
| rs35094235 | rs351374   | rs35183041 | rs35223785 | rs35268627 | rs35316912 | rs353592   | rs35403253  |
| rs35094522 | rs351376   | rs35183060 | rs35224956 | rs35269301 | rs35317163 | rs35359468 | rs354033    |
| rs35096409 | rs35137994 | rs35184771 | rs35225048 | rs35269676 | rs35317214 | rs35359588 | rs35405209  |
| rs35096708 | rs351407   | rs35184820 | rs35225200 | rs35270284 | rs35317317 | rs35360328 | rs35406259  |
| rs35098703 | rs35140707 | rs35185444 | rs35225290 | rs35270497 | rs35317979 | rs35360964 | rs35406919  |
| rs35099106 | rs35141569 | rs351855   | rs35225488 | rs35270792 | rs35318627 | rs35361042 | rs35407     |
| rs35099186 | rs35142265 | rs351862   | rs35225944 | rs35271870 | rs35318931 | rs35362007 | rs35407591  |
| rs35099767 | rs35142429 | rs35186465 | rs35226131 | rs35272197 | rs35318942 | rs35362712 | rs35407642  |
| rs35101890 | rs35142762 | rs35186877 | rs35228488 | rs35272691 | rs35319517 | rs35362746 | rs35407685  |
| rs35102205 | rs35142847 | rs35188261 | rs35228837 | rs35273932 | rs35319653 | rs35362819 | rs35408430  |
| rs35102285 | rs35143187 | rs35188965 | rs35229050 | rs35274053 | rs35320439 | rs35362908 | rs35408611  |
| rs35104374 | rs35143646 | rs35189091 | rs35229181 | rs35274748 | rs35320690 | rs35363078 | rs35408848  |
| rs35104491 | rs35144506 | rs35189173 | rs35229468 | rs35275482 | rs35320790 | rs353634   | rs35409523  |
| rs35105391 | rs35144767 | rs35189230 | rs35230100 | rs35275911 | rs35322542 | rs35363532 | rs35409891  |
| rs35106244 | rs35144922 | rs35190411 | rs35230453 | rs35275997 | rs35322724 | rs35364449 | rs35410017  |
| rs35107139 | rs35146811 | rs35191248 | rs35231275 | rs35277540 | rs35324223 | rs35365035 | rs35410524  |
| rs35107435 | rs35147325 | rs35192107 | rs35232147 | rs35277578 | rs35324266 | rs35365539 | rs35412     |
| rs35107470 | rs35147679 | rs35192697 | rs35232605 | rs35277959 | rs35326378 | rs35367489 | rs354113307 |
| rs35107973 | rs35148461 | rs351930   | rs35233014 | rs35284403 | rs35327014 | rs35368205 | rs35414396  |
| rs35108384 | rs35148638 | rs35193497 | rs35233100 | rs35284526 | rs35327298 | rs35368417 | rs35414672  |

|            |            |            |            |            |            |            |             |
|------------|------------|------------|------------|------------|------------|------------|-------------|
| rs35416333 | rs35461065 | rs35504893 | rs35543418 | rs35583073 | rs356219   | rs35679149 | rs35731967  |
| rs35416548 | rs35461662 | rs35505    | rs35544454 | rs355838   | rs356220   | rs35679777 | rs35732522  |
| rs35417399 | rs35462537 | rs35505390 | rs35544841 | rs35584079 | rs356228   | rs35680304 | rs35733169  |
| rs35417517 | rs35463377 | rs35505705 | rs35546571 | rs35585881 | rs35623509 | rs35681505 | rs35733856  |
| rs35417544 | rs35463868 | rs35505893 | rs35546597 | rs35587371 | rs35624680 | rs35681675 | rs35734242  |
| rs35417702 | rs35464031 | rs35506    | rs35547463 | rs35587648 | rs35624710 | rs35682716 | rs35735140  |
| rs35419826 | rs35466244 | rs35506085 | rs35547687 | rs35587819 | rs35625885 | rs35683183 | rs35735865  |
| rs35419901 | rs35467189 | rs35506206 | rs35548284 | rs35588936 | rs356265   | rs356833   | rs35736272  |
| rs35420030 | rs35468074 | rs35507944 | rs35548455 | rs35589149 | rs35628589 | rs35685453 | rs35736414  |
| rs354202   | rs35469118 | rs35509282 | rs35548551 | rs35589428 | rs35629566 | rs35686232 | rs35736498  |
| rs35423927 | rs35469344 | rs35510613 | rs35548690 | rs35589574 | rs35630910 | rs35688236 | rs35737316  |
| rs35424224 | rs35469349 | rs35511257 | rs35549608 | rs35589824 | rs35631117 | rs35688352 | rs35738294  |
| rs35424364 | rs35470271 | rs35513223 | rs35550815 | rs35590005 | rs35633876 | rs35689231 | rs35738585  |
| rs35424804 | rs354703   | rs35513757 | rs35551468 | rs35590487 | rs35636169 | rs356907   | rs35739012  |
| rs35424856 | rs354707   | rs35513824 | rs35551616 | rs35590725 | rs35636653 | rs35690712 | rs35740288  |
| rs35427    | rs35471408 | rs35514224 | rs35551703 | rs35590893 | rs35638197 | rs35690864 | rs35740963  |
| rs35427507 | rs35471498 | rs35514852 | rs35553410 | rs355911   | rs35638230 | rs35692233 | rs35741360  |
| rs35428899 | rs354719   | rs35518073 | rs35554443 | rs355914   | rs35638741 | rs356926   | rs35741362  |
| rs35429    | rs35472514 | rs35518360 | rs35554486 | rs35592    | rs35639661 | rs35692677 | rs35741374  |
| rs35430475 | rs35472615 | rs35518690 | rs355546   | rs35592432 | rs35640778 | rs35693910 | rs35742417  |
| rs35430653 | rs35472707 | rs35518693 | rs35554786 | rs35592645 | rs35641442 | rs35694396 | rs35742750  |
| rs35430872 | rs35473591 | rs35519228 | rs35555695 | rs35593046 | rs35643003 | rs35694679 | rs357438    |
| rs35430985 | rs35473622 | rs35519908 | rs35555795 | rs35593106 | rs35643216 | rs35695070 | rs35744461  |
| rs35431118 | rs35473710 | rs35520373 | rs35558461 | rs35593442 | rs35643768 | rs35695997 | rs35745455  |
| rs35432    | rs35475471 | rs35521277 | rs35559328 | rs355938   | rs35643925 | rs35696875 | rs35745507  |
| rs35432452 | rs35478252 | rs35521383 | rs35559831 | rs35595052 | rs35649801 | rs35697587 | rs35745826  |
| rs35433309 | rs35478572 | rs35522344 | rs35559984 | rs35595751 | rs35650976 | rs35697782 | rs35746112  |
| rs35434    | rs35479618 | rs35522438 | rs35560038 | rs35596    | rs35653190 | rs35698268 | rs35746342  |
| rs35436    | rs35480293 | rs35524223 | rs35560431 | rs35596070 | rs35653278 | rs35698456 | rs35747     |
| rs35436409 | rs35480566 | rs35524229 | rs35561078 | rs35596561 | rs35654783 | rs356992   | rs35747824  |
| rs35436838 | rs35481633 | rs35524242 | rs35561531 | rs35597318 | rs35654957 | rs35699219 | rs35748495  |
| rs35438341 | rs354820   | rs35524253 | rs35562567 | rs35597970 | rs35655122 | rs356999   | rs35748596  |
| rs35438712 | rs35482321 | rs35524515 | rs35562935 | rs35598889 | rs35656245 | rs35700159 | rs357489    |
| rs35440220 | rs35483183 | rs35525401 | rs35563099 | rs35599367 | rs35657711 | rs35700460 | rs35749011  |
| rs35440906 | rs35483288 | rs35526088 | rs35563401 | rs35600242 | rs35658582 | rs35702515 | rs35749332  |
| rs35441    | rs35483362 | rs35526343 | rs35564315 | rs35601156 | rs35658696 | rs35702851 | rs35750745  |
| rs35441874 | rs35483388 | rs35526541 | rs35565381 | rs35601737 | rs35659126 | rs35703629 | rs357508    |
| rs35443    | rs35483681 | rs35526560 | rs35565533 | rs35602316 | rs35660843 | rs35703946 | rs35751     |
| rs35443777 | rs35483733 | rs35528310 | rs35565630 | rs35602605 | rs35661464 | rs35705950 | rs357512    |
| rs35443929 | rs35484123 | rs35528533 | rs35565902 | rs35602868 | rs35661734 | rs35706812 | rs35751669  |
| rs35444    | rs35484700 | rs35529250 | rs35565997 | rs35604463 | rs35662245 | rs35708060 | rs35751693  |
| rs35446926 | rs35485741 | rs35529421 | rs35567312 | rs35606437 | rs35662416 | rs35708913 | rs35752015  |
| rs35446936 | rs35485933 | rs35531047 | rs35568738 | rs35607894 | rs35662434 | rs35709627 | rs35752700  |
| rs35447133 | rs35486093 | rs35531439 | rs35568851 | rs35608075 | rs35662455 | rs35710320 | rs35753840  |
| rs35447162 | rs35487709 | rs35531607 | rs35569312 | rs35608584 | rs35664695 | rs35711462 | rs35754645  |
| rs35447933 | rs35487869 | rs35532423 | rs35569628 | rs35608616 | rs35665085 | rs35712872 | rs35754740  |
| rs35448214 | rs35488337 | rs35532491 | rs3557     | rs35609705 | rs35665093 | rs35713211 | rs35755011  |
| rs35449046 | rs35488709 | rs35532684 | rs35570272 | rs35609938 | rs35665738 | rs35714695 | rs35755165  |
| rs35449774 | rs35489971 | rs35533339 | rs35570395 | rs35610040 | rs35667547 | rs35715058 | rs35755513  |
| rs35449889 | rs35490268 | rs35533905 | rs35570576 | rs35610290 | rs35667731 | rs35715914 | rs35755865  |
| rs35450617 | rs35492837 | rs35534130 | rs35570672 | rs356105   | rs35667974 | rs35716097 | rs3575564   |
| rs35450692 | rs35493131 | rs35534179 | rs35571080 | rs35610898 | rs35668054 | rs35717469 | rs3575565   |
| rs354508   | rs35493868 | rs35534776 | rs35571646 | rs35611929 | rs35669853 | rs35717986 | rs357556579 |
| rs35450971 | rs35493937 | rs35535570 | rs35572189 | rs35612722 | rs35669975 | rs35720761 | rs357556741 |
| rs35451331 | rs35494336 | rs35535898 | rs35574015 | rs35612982 | rs35671561 | rs35720801 | rs357558634 |
| rs35452727 | rs35494566 | rs35537543 | rs355748   | rs35613836 | rs35672256 | rs35720900 | rs357559345 |
| rs354530   | rs35494829 | rs35538052 | rs355754   | rs35614134 | rs35672602 | rs35722701 | rs357559703 |
| rs35453021 | rs35495014 | rs35538083 | rs355772   | rs35614264 | rs35673026 | rs35722835 | rs357559773 |
| rs35453391 | rs35495115 | rs35538465 | rs35577563 | rs35614773 | rs35673167 | rs35723031 | rs357560656 |
| rs35453575 | rs35495505 | rs35539500 | rs355777   | rs35617250 | rs35673255 | rs357253   | rs357560956 |
| rs354540   | rs35495893 | rs35539723 | rs35577967 | rs356179   | rs35675064 | rs35725652 | rs3575613   |
| rs354543   | rs35497503 | rs35539975 | rs35578035 | rs356182   | rs35675096 | rs35727810 | rs357561479 |
| rs35455419 | rs35498021 | rs35540156 | rs35578928 | rs35618688 | rs35675302 | rs357282   | rs357561782 |
| rs35457250 | rs35501037 | rs35540610 | rs35580429 | rs35620248 | rs35675666 | rs35729384 | rs3575618   |
| rs35457431 | rs35502373 | rs35541465 | rs35580606 | rs356203   | rs35676364 | rs35730213 | rs357561891 |
| rs35458154 | rs35502919 | rs35542019 | rs35582239 | rs35620480 | rs35677470 | rs357303   | rs357561930 |
| rs35458538 | rs35504735 | rs35542031 | rs35582280 | rs35621564 | rs35678078 | rs357304   | rs357562459 |

|              |            |            |            |            |            |            |            |
|--------------|------------|------------|------------|------------|------------|------------|------------|
| rs35763039   | rs35810240 | rs35871176 | rs35917342 | rs35957135 | rs36004974 | rs36044436 | rs36085856 |
| rs35763270   | rs35810840 | rs35872193 | rs35917376 | rs35957220 | rs36005340 | rs36045143 | rs36086195 |
| rs35763383   | rs35811586 | rs35872768 | rs35917528 | rs35957544 | rs36006259 | rs36045594 | rs36086366 |
| rs35763415   | rs35812910 | rs35873233 | rs35918296 | rs35957722 | rs36006409 | rs36046591 | rs36086577 |
| rs35763419   | rs35814191 | rs35873531 | rs35919256 | rs35958438 | rs36006524 | rs36046942 | rs36088520 |
| rs35763453   | rs35814619 | rs35874463 | rs35920692 | rs35958630 | rs36007635 | rs36047283 | rs36088869 |
| rs35764600   | rs35814746 | rs35874523 | rs35921795 | rs35958868 | rs36008198 | rs36049560 | rs36089024 |
| rs35764675   | rs35816040 | rs35875065 | rs3592233  | rs35959395 | rs36010659 | rs36050540 | rs36089182 |
| rs35765032   | rs35816125 | rs35876590 | rs359234   | rs35959442 | rs36010924 | rs36051354 | rs36090449 |
| rs35765401   | rs35816571 | rs35879612 | rs35923643 | rs35960711 | rs36010930 | rs36051450 | rs36092527 |
| rs35767      | rs35816944 | rs35879747 | rs359237   | rs35961074 | rs36011282 | rs36052053 | rs36092669 |
| rs35768130   | rs35817541 | rs35880221 | rs35924188 | rs35963943 | rs360124   | rs36052336 | rs36093393 |
| rs35768595   | rs35817974 | rs35880697 | rs359243   | rs35964477 | rs36012880 | rs36053309 | rs36093924 |
| rs35770472   | rs35822372 | rs35881094 | rs35924503 | rs35966827 | rs36013391 | rs36053385 | rs36094398 |
| rs35770984   | rs358228   | rs35881190 | rs359247   | rs35967351 | rs36013629 | rs36055153 | rs36094783 |
| rs35771425   | rs35822882 | rs35881303 | rs359248   | rs35968570 | rs36013981 | rs36055559 | rs36095784 |
| rs35771468   | rs358231   | rs35882350 | rs359252   | rs35968670 | rs36014035 | rs36055714 | rs36096196 |
| rs35771849   | rs35823191 | rs35883536 | rs359253   | rs35968884 | rs36014129 | rs36056263 | rs36096231 |
| rs35771878   | rs35824797 | rs35883965 | rs35925637 | rs35969387 | rs360142   | rs36056437 | rs36096257 |
| rs35772238   | rs35825582 | rs35884319 | rs35925872 | rs35969972 | rs360153   | rs36057735 | rs36096780 |
| rs35774141   | rs35826760 | rs35885398 | rs359260   | rs35971149 | rs360155   | rs36058533 | rs36100854 |
| rs35774874   | rs35827475 | rs35887108 | rs35926495 | rs35971989 | rs36015615 | rs36061333 | rs36101491 |
| rs35775580   | rs35828350 | rs35888008 | rs35927132 | rs35972789 | rs360158   | rs36061463 | rs36103164 |
| rs35776863   | rs35828463 | rs35889496 | rs35928002 | rs35975139 | rs36016056 | rs36061810 | rs36103835 |
| rs35777071   | rs35828909 | rs35889520 | rs35928531 | rs35975406 | rs36016753 | rs36061954 | rs36104871 |
| rs35779991   | rs35832626 | rs35891966 | rs35929    | rs35977166 | rs36018387 | rs36062310 | rs36105360 |
| rs35780153   | rs35832694 | rs35892197 | rs35929052 | rs35978510 | rs36019311 | rs36062478 | rs36106412 |
| rs35782676   | rs35833281 | rs35892873 | rs35929108 | rs35979828 | rs36020010 | rs36063234 | rs36108764 |
| rs35783704   | rs35835131 | rs35893164 | rs35929659 | rs35979968 | rs36020076 | rs36063247 | rs36109883 |
| rs35783812   | rs35835168 | rs35894069 | rs35929923 | rs35980001 | rs36020612 | rs36063579 | rs36109901 |
| rs35786299   | rs35837297 | rs35894137 | rs35930927 | rs35980751 | rs36022132 | rs360639   | rs36110641 |
| rs35786788   | rs35837782 | rs35894886 | rs35931837 | rs35981664 | rs36022378 | rs36064799 | rs36111056 |
| rs35787829   | rs35840966 | rs35895680 | rs35933007 | rs35982802 | rs36023246 | rs36065733 | rs36112366 |
| rs35788208   | rs35841477 | rs35896134 | rs35934    | rs35982947 | rs36023390 | rs36066545 | rs36114380 |
| rs35788479   | rs35841741 | rs35897051 | rs35934224 | rs35983033 | rs36023504 | rs36067918 | rs36115365 |
| rs35789010   | rs35844144 | rs35897671 | rs35935052 | rs35984974 | rs36023701 | rs36068213 | rs36116147 |
| rs35789108   | rs35845166 | rs35899183 | rs35935752 | rs35985639 | rs36023901 | rs36068923 | rs36116239 |
| rs35789132   | rs35846197 | rs35900609 | rs35936182 | rs35986780 | rs36023980 | rs36069724 | rs36117464 |
| rs35789178   | rs35846768 | rs35901985 | rs35936358 | rs35986807 | rs36024104 | rs36070911 | rs36118723 |
| rs35789607   | rs35847463 | rs35902169 | rs35937215 | rs35986908 | rs36025258 | rs36071027 | rs36119120 |
| rs35789697   | rs35847492 | rs359027   | rs35937742 | rs35987657 | rs36026517 | rs36071136 | rs36119825 |
| rs35790189   | rs35847895 | rs35903783 | rs35937770 | rs35988618 | rs36026923 | rs36071802 | rs36120341 |
| rs35791045   | rs35848200 | rs35904419 | rs35940156 | rs35989399 | rs36027134 | rs36072132 | rs36120387 |
| rs35791293   | rs35849525 | rs35904471 | rs35941349 | rs35990176 | rs36027301 | rs36072155 | rs36120499 |
| rs35791340   | rs35850753 | rs35906288 | rs35942390 | rs35991354 | rs36029218 | rs36073657 | rs36120534 |
| rs35792458   | rs35851103 | rs35906730 | rs35942569 | rs35991856 | rs36029372 | rs36075092 | rs361212   |
| rs357925     | rs35851183 | rs35908158 | rs359431   | rs35992941 | rs36030660 | rs36075906 | rs36122125 |
| rs35792732   | rs35851551 | rs35908703 | rs35943712 | rs35993073 | rs36032232 | rs36077346 | rs36125859 |
| rs35794310/r | rs35852935 | rs35909029 | rs359443   | rs35993099 | rs36032338 | rs36078151 | rs36127550 |
| s147955325/  | rs35853021 | rs35909109 | rs35945472 | rs359935   | rs36032647 | rs36079165 | rs36130286 |
| rs11415565   | rs35853157 | rs35909544 | rs359457   | rs35994028 | rs36032941 | rs36079233 | rs36131051 |
| rs35795877   | rs35855035 | rs35910339 | rs35946026 | rs35994060 | rs36033    | rs36079436 | rs36131420 |
| rs35796750   | rs35855737 | rs35911461 | rs35946544 | rs35994626 | rs36034102 | rs36080062 | rs36132109 |
| rs357974     | rs35858192 | rs35911902 | rs359466   | rs35995169 | rs36034473 | rs360801   | rs36138353 |
| rs35797651   | rs35859536 | rs35912034 | rs35947132 | rs35995292 | rs36035825 | rs360804   | rs36138811 |
| rs35797675   | rs35860194 | rs35912128 | rs35947542 | rs35995659 | rs36038176 | rs36080575 | rs36139342 |
| rs35797862   | rs35860234 | rs35913393 | rs359477   | rs35997243 | rs36038307 | rs36081020 | rs36142511 |
| rs35799005   | rs35861321 | rs35913461 | rs35951    | rs35998080 | rs36039672 | rs36081056 | rs36146269 |
| rs35799012   | rs35861938 | rs35914442 | rs35951924 | rs35998524 | rs36040403 | rs36081664 | rs36147593 |
| rs35801460   | rs35862435 | rs35914801 | rs35952400 | rs35999103 | rs360408   | rs36082205 | rs36153567 |
| rs35807109   | rs35864014 | rs35914833 | rs35952432 | rs35999162 | rs36041454 | rs36082259 | rs36160616 |
| rs35807116   | rs35864494 | rs35915391 | rs35954307 | rs36000080 | rs36041727 | rs36083386 | rs36162392 |
| rs35808169   | rs35866622 | rs35915890 | rs35954730 | rs36000545 | rs36042294 | rs36083909 | rs3617     |
| rs35808767   | rs35867    | rs35917007 | rs35955110 | rs36001488 | rs36043200 | rs36084354 | rs36171610 |
| rs35809007   | rs35867629 | rs35917062 | rs35955747 | rs360017   | rs36043408 | rs36084521 | rs361725   |
| rs35809595   | rs35870583 | rs35917071 | rs35956082 | rs36003065 | rs36043959 | rs36084697 | rs36174733 |
| rs35809608   | rs35870709 | rs35917214 | rs35956093 | rs36004190 | rs36044402 | rs36085849 | rs36179992 |

|             |             |             |             |             |             |             |             |
|-------------|-------------|-------------|-------------|-------------|-------------|-------------|-------------|
| rs36181864  | rs367804438 | rs370189685 | rs372073489 | rs3732378   | rs3736030   | rs3740393   | rs3742785   |
| rs36182456  | rs367917283 | rs370221402 | rs372085772 | rs3732386   | rs373607110 | rs3740394   | rs374292503 |
| rs36194177  | rs367983479 | rs370222    | rs372091    | rs3732421   | rs3736164   | rs374039502 | rs3742970   |
| rs36194942  | rs368001049 | rs370248141 | rs372125612 | rs373244060 | rs3736166   | rs3740397   | rs3743044   |
| rs36196656  | rs368031913 | rs370248933 | rs372149781 | rs3732508   | rs3736206   | rs3740405   | rs3743063   |
| rs36198109  | rs368082223 | rs370387    | rs372193935 | rs3732530   | rs3736228   | rs3740422   | rs3743078   |
| rs36198324  | rs368110163 | rs370462350 | rs372212227 | rs3732837   | rs3736290   | rs3740471   | rs3743103   |
| rs36205178  | rs368123    | rs370545    | rs372229746 | rs3732869   | rs3736313   | rs3740607   | rs3743104   |
| rs36205397  | rs368187    | rs370569753 | rs372272284 | rs373288921 | rs3736403   | rs3740685   | rs3743157   |
| rs36206512  | rs368222845 | rs370591186 | rs372314521 | rs3733018   | rs3736485   | rs3740688   | rs3743266   |
| rs36207871  | rs368280815 | rs37060     | rs372321    | rs3733125   | rs3736594   | rs3740689   | rs3743347   |
| rs36209093  | rs368287    | rs370612    | rs372323640 | rs3733159   | rs3736675   | rs3740699   | rs374335    |
| rs36212732  | rs368332850 | rs37062     | rs372362333 | rs3733164   | rs3736712   | rs3740781   | rs3743392   |
| rs36225153  | rs368417629 | rs370654105 | rs372370600 | rs3733215   | rs3736802   | rs3740861   | rs3743553   |
| rs36226649  | rs368427206 | rs370718489 | rs372371648 | rs3733235   | rs37369     | rs3740909   | rs3743588   |
| rs362275    | rs368433    | rs370763    | rs372391934 | rs3733309   | rs3736947   | rs3740977   | rs3743609   |
| rs36229146  | rs368447685 | rs370771    | rs372411283 | rs3733321   | rs3737      | rs3741148   | rs374372356 |
| rs36229204  | rs368465    | rs370778863 | rs372460062 | rs3733345   | rs37370     | rs3741156   | rs3743748   |
| rs362307    | rs368503    | rs370802342 | rs372476640 | rs3733349   | rs373703160 | rs3741205   | rs3743794   |
| rs36232     | rs368506132 | rs370820588 | rs372518971 | rs3733402   | rs3737178   | rs3741210   | rs3743860   |
| rs36233537  | rs368507952 | rs370838138 | rs372529987 | rs3733409   | rs3737276   | rs3741240   | rs3743861   |
| rs36234     | rs368510    | rs370865377 | rs372532055 | rs3733526   | rs373739034 | rs3741259   | rs374387539 |
| rs362649    | rs368540015 | rs370868556 | rs372539308 | rs3733588   | rs3737516   | rs3741280   | rs3743879   |
| rs363066    | rs368699386 | rs370869951 | rs372543528 | rs3733589   | rs3737577   | rs3741297   | rs374393673 |
| rs363075    | rs368755101 | rs370981115 | rs372562666 | rs3733590   | rs3737611   | rs3741298   | rs3743986   |
| rs363092    | rs368770339 | rs371162363 | rs372750863 | rs3733606   | rs3737665   | rs3741378   | rs3744009   |
| rs363096    | rs368848598 | rs371199618 | rs372767202 | rs3733631   | rs373767    | rs3741380   | rs3744010   |
| rs36350     | rs368865    | rs371212078 | rs372822970 | rs3733632   | rs37377     | rs3741404   | rs3744017   |
| rs363656    | rs368910700 | rs371231344 | rs372883    | rs3733724   | rs3737798   | rs3741411   | rs3744020   |
| rs36423     | rs368919625 | rs371233761 | rs372902    | rs373373    | rs3737801   | rs3741414   | rs3744028   |
| rs364585    | rs368928614 | rs371273023 | rs372936466 | rs373381313 | rs3737815   | rs3741434   | rs3744032   |
| rs364663    | rs368938916 | rs371314787 | rs3729639   | rs3733829   | rs373784744 | rs3741442   | rs3744061   |
| rs364926    | rs368975    | rs371328828 | rs372964153 | rs3733890   | rs3737883   | rs3741472   | rs3744070   |
| rs365032    | rs368977885 | rs371331393 | rs3729986   | rs3733892   | rs3737926   | rs3741475   | rs374409015 |
| rs365060    | rs369062552 | rs371339881 | rs3729989   | rs3733897   | rs3737992   | rs3741499   | rs3744347   |
| rs365132    | rs369081    | rs371347025 | rs3730088   | rs373397275 | rs373810425 | rs3741508   | rs37445     |
| rs365188    | rs369160772 | rs371350765 | rs373023916 | rs3734219   | rs3738182   | rs3741521   | rs3744535   |
| rs365299    | rs369173    | rs371417    | rs373032    | rs373421938 | rs3738200   | rs374153    | rs3744593   |
| rs365309    | rs369186418 | rs371426388 | rs3730556   | rs3734266   | rs3738316   | rs3741651   | rs3744644   |
| rs365552    | rs369194245 | rs371436826 | rs3730590   | rs3734398   | rs373836950 | rs374171962 | rs3744760   |
| rs365663    | rs369230    | rs371454    | rs3730775   | rs373448023 | rs3738476   | rs3741782   | rs3744787   |
| rs365737    | rs369298568 | rs371471055 | rs3731211   | rs3734500   | rs3738487   | rs374179645 | rs3744858   |
| rs365825    | rs369304377 | rs371473603 | rs3731217   | rs3734572   | rs3738676   | rs3741798   | rs374499153 |
| rs365836    | rs369306257 | rs371506    | rs3731249   | rs3734626   | rs3738725   | rs374187209 | rs3745150   |
| rs365865    | rs369307656 | rs371541208 | rs3731267   | rs373465055 | rs3738772   | rs3741884   | rs374528934 |
| rs36599     | rs369328859 | rs371570792 | rs373130365 | rs3734692   | rs3738814   | rs3742003   | rs3745318   |
| rs365990    | rs369386096 | rs371608673 | rs3731570   | rs373496042 | rs3738934   | rs3742015   | rs374532236 |
| rs36600     | rs369386134 | rs371617997 | rs3731600   | rs3735007   | rs373894    | rs3742020   | rs3745348   |
| rs36629     | rs369457490 | rs371633505 | rs3731663   | rs3735025   | rs3738952   | rs3742021   | rs3745367   |
| rs366327    | rs369461388 | rs371638091 | rs3731696   | rs3735026   | rs3739070   | rs3742028   | rs3745473   |
| rs366577    | rs369495964 | rs371642320 | rs3731714   | rs3735080   | rs3739081   | rs3742130   | rs3745516   |
| rs366684    | rs369497605 | rs371672993 | rs3731818   | rs373514022 | rs3739514   | rs3742223   | rs3745540   |
| rs36697     | rs369515117 | rs371673613 | rs3731827   | rs3735167   | rs3739555   | rs3742233   | rs3745542   |
| rs366991    | rs369532258 | rs371681307 | rs3731859   | rs373518068 | rs3739556   | rs3742264   | rs3745548   |
| rs367023    | rs369552432 | rs371802875 | rs3731861   | rs373520633 | rs373962169 | rs3742271   | rs3745567   |
| rs367026    | rs369636044 | rs371824358 | rs3731866   | rs373546979 | rs3739707   | rs3742305   | rs3745621   |
| rs36704     | rs369637    | rs371825    | rs3731890   | rs3735478   | rs3739737   | rs3742321   | rs3745647   |
| rs367068    | rs369670596 | rs371894931 | rs3732102   | rs3735485   | rs3739821   | rs3742365   | rs3745683   |
| rs367070    | rs369762169 | rs371907673 | rs373214016 | rs3735491   | rs3739893   | rs3742366   | rs374588807 |
| rs367166    | rs369805468 | rs371908554 | rs373214284 | rs3735533   | rs3739996   | rs3742445   | rs374598428 |
| rs367543    | rs369837642 | rs371915    | rs373219922 | rs3735567   | rs3739998   | rs3742506   | rs3745992   |
| rs367569    | rs369849874 | rs371918919 | rs3732218   | rs3735607   | rs3740049   | rs3742564   | rs3746038   |
| rs367677    | rs369943525 | rs371923485 | rs3732220   | rs3735609   | rs374017    | rs3742597   | rs3746069   |
| rs367700296 | rs370025470 | rs371929806 | rs3732356   | rs3735634   | rs3740237   | rs3742608   | rs3746072   |
| rs367705866 | rs37004     | rs372002372 | rs3732357   | rs3735656   | rs374035142 | rs3742625   | rs3746101   |
| rs367763803 | rs370120147 | rs372030255 | rs3732359   | rs373579    | rs3740360   | rs3742704   | rs3746159   |
| rs367786013 | rs370158623 | rs372065719 | rs373237642 | rs3735814   | rs3740390   | rs3742716   | rs3746181   |

|             |             |             |             |             |             |             |             |
|-------------|-------------|-------------|-------------|-------------|-------------|-------------|-------------|
| rs3746187   | rs3749228   | rs375287631 | rs3757727   | rs3760954   | rs3765154   | rs376891043 | rs3772912   |
| rs3746420   | rs3749237   | rs3752904   | rs3757771   | rs3760960   | rs3765209   | rs376898975 | rs3773240   |
| rs3746428   | rs3749290   | rs3753394   | rs3757837   | rs376096585 | rs376522078 | rs3769050   | rs377326799 |
| rs3746435   | rs3749376   | rs3753396   | rs3757840   | rs376097536 | rs3765264   | rs376907784 | rs377335397 |
| rs3746446   | rs3749387   | rs3753414   | rs3757853   | rs3760982   | rs3765342   | rs376911010 | rs377343294 |
| rs3746448   | rs3749440   | rs3753581   | rs3757868   | rs3760994   | rs3765350   | rs3769309   | rs377351806 |
| rs3746471   | rs37494924  | rs3753584   | rs375794930 | rs3761123   | rs3765407   | rs3769312   | rs3773777   |
| rs3746472   | rs3749591   | rs375359693 | rs3757966   | rs376117198 | rs3765438   | rs3769528   | rs3773910   |
| rs3746575   | rs3749748   | rs3753639   | rs3757969   | rs3761215   | rs3765459   | rs376967724 | rs3774039   |
| rs3746601   | rs3749759   | rs3753693   | rs3758079   | rs3761376   | rs3765467   | rs3769810   | rs3774063   |
| rs3746615   | rs3749833   | rs375375234 | rs3758086   | rs3761422   | rs3765502   | rs3769818   | rs377424471 |
| rs3746619   | rs3749946   | rs37538     | rs375811360 | rs3761444   | rs3765524   | rs3769821   | rs3774292   |
| rs3746661   | rs374994702 | rs3753841   | rs375818588 | rs3761445   | rs37658     | rs3769823   | rs3774298   |
| rs374673134 | rs3749971   | rs375390883 | rs3758212   | rs3761467   | rs376592364 | rs3769825   | rs3774354   |
| rs3746778   | rs3750081   | rs3754028   | rs375822897 | rs3761704   | rs3765963   | rs3769885   | rs3774355   |
| rs3746915   | rs3750082   | rs3754097   | rs3758253   | rs3761706   | rs3765964   | rs376991420 | rs3774372   |
| rs374704114 | rs3750296   | rs3754140   | rs3758348   | rs3761781   | rs3765967   | rs376993806 | rs3774427   |
| rs3747093   | rs3750310   | rs3754214   | rs3758349   | rs3761846   | rs3765971   | rs3769943   | rs3774442   |
| rs374715536 | rs375034445 | rs3754224   | rs3758413   | rs3761847   | rs3766160   | rs3769949   | rs3774447   |
| rs374716904 | rs3750437   | rs3754260   | rs3758575   | rs3761856   | rs3766186   | rs3769955   | rs3774573   |
| rs3747207   | rs3750631   | rs3754442   | rs3758641   | rs3761959   | rs3766197   | rs3769983   | rs3774589   |
| rs374722    | rs375066    | rs3754512   | rs3758643   | rs3762056   | rs3766370   | rs3770104   | rs3774605   |
| rs3747367   | rs3750846   | rs3754648   | rs3758666   | rs3762220   | rs376649957 | rs3770136   | rs3774702   |
| rs374744684 | rs3750847   | rs3754802   | rs3758667   | rs3762297   | rs376650813 | rs3770253   | rs3774709   |
| rs3747463   | rs3750848   | rs3754829   | rs375873    | rs3762318   | rs3766606   | rs377057    | rs3774723   |
| rs3747481   | rs3750944   | rs3754855   | rs3758927   | rs3762444   | rs3766612   | rs3770585   | rs3774726   |
| rs3747517   | rs3750996   | rs3754970   | rs3758938   | rs3762637   | rs3766673   | rs377062541 | rs3774745   |
| rs3747550   | rs3751006   | rs3755021   | rs3759094   | rs3762672   | rs376684861 | rs3770636   | rs3774749   |
| rs3747570   | rs3751046   | rs3755132   | rs375909657 | rs3762673   | rs3766889   | rs377070    | rs3774751   |
| rs3747577   | rs3751081   | rs3755157   | rs375915173 | rs3762767   | rs3766920   | rs377073464 | rs3774800   |
| rs3747579   | rs3751129   | rs3755189   | rs3759287   | rs376286    | rs3766979   | rs3770770   | rs3774937   |
| rs3747580   | rs3751143   | rs375519927 | rs3759310   | rs3762988   | rs3767199   | rs3770774   | rs3774959   |
| rs3747587   | rs3751198   | rs3755206   | rs375938082 | rs3763236   | rs3767240   | rs3770776   | rs3775058   |
| rs3747630   | rs3751236   | rs3755266   | rs3759549   | rs3763267   | rs3767247   | rs377079849 | rs3775065   |
| rs3747631   | rs3751237   | rs3755319   | rs3759579   | rs376329707 | rs3767248   | rs3770799   | rs3775068   |
| rs3747636   | rs3751239   | rs3755397   | rs3759582   | rs3763305   | rs3767297   | rs377080180 | rs3775150   |
| rs3747647   | rs375125008 | rs375548795 | rs3759584   | rs3763309   | rs3767627   | rs3770890   | rs3775228   |
| rs374783381 | rs3751289   | rs3755605   | rs375968322 | rs3763313   | rs3767742   | rs377110161 | rs3775291   |
| rs3747869   | rs375131378 | rs3755652   | rs3759710   | rs3763317   | rs3767745   | rs3771166   | rs3775298   |
| rs3747957   | rs3751331   | rs3755799   | rs375972689 | rs3763354   | rs3767747   | rs3771167   | rs3775389   |
| rs3747965   | rs375138924 | rs3755879   | rs3759741   | rs376357816 | rs3767809   | rs3771175   | rs3775514   |
| rs3747973   | rs375147469 | rs3755899   | rs3759794   | rs376362701 | rs3767810   | rs3771180   | rs3775519   |
| rs3748022   | rs3751591   | rs3755934   | rs375980630 | rs3763669   | rs3767812   | rs3771243   | rs377556    |
| rs3748034   | rs3751599   | rs3755955   | rs3759809   | rs3763745   | rs3767844   | rs3771258   | rs377560922 |
| rs3748069   | rs3751667   | rs3755967   | rs375984409 | rs3764002   | rs3767846   | rs3771317   | rs3775770   |
| rs374810    | rs3751712   | rs3756008   | rs3760047   | rs3764022   | rs3767848   | rs3771341   | rs377584195 |
| rs3748126   | rs3751745   | rs3756171   | rs376008    | rs3764032   | rs3767876   | rs3771381   | rs3775887   |
| rs3748136   | rs3751812   | rs3756173   | rs3760091   | rs3764147   | rs3767879   | rs377141407 | rs3775932   |
| rs374824710 | rs3751837   | rs3756290   | rs3760128   | rs3764246   | rs3767962   | rs3771498   | rs3775946   |
| rs3748301   | rs3751855   | rs3756309   | rs3760137   | rs3764261   | rs3768013   | rs3771501   | rs3775947   |
| rs3748302   | rs3751859   | rs3756668   | rs3760185   | rs3764351   | rs3768044   | rs377150901 | rs3775948   |
| rs3748387   | rs3751908   | rs3756699   | rs376022098 | rs3764354   | rs376814364 | rs3771529   | rs3775967   |
| rs3748400   | rs3751909   | rs3756703   | rs3760230   | rs3764361   | rs3768307   | rs3771570   | rs377599    |
| rs3748570   | rs3751972   | rs3756766   | rs3760231   | rs3764419   | rs3768321   | rs377181093 | rs3776005   |
| rs3748656   | rs3752102   | rs3756982   | rs3760232   | rs3764512   | rs3768419   | rs3771863   | rs377602035 |
| rs3748784   | rs3752105   | rs3757037   | rs3760318   | rs3764523   | rs3768420   | rs377195216 | rs3776051   |
| rs3748816   | rs3752151   | rs3757130   | rs3760381   | rs3764567   | rs3768469   | rs3772071   | rs3776081   |
| rs3748817   | rs3752231   | rs3757155   | rs3760456   | rs3764613   | rs3768480   | rs3772128   | rs3776089   |
| rs374892365 | rs3752241   | rs3757247   | rs376052817 | rs3764618   | rs3768610   | rs377218055 | rs3776208   |
| rs3749034   | rs3752246   | rs3757318   | rs376054711 | rs3764650   | rs3768617   | rs3772190   | rs3776221   |
| rs37491     | rs3752442   | rs3757322   | rs3760702   | rs3764769   | rs3768644   | rs3772219   | rs377623    |
| rs3749110   | rs375246367 | rs3757354   | rs3760708   | rs376477778 | rs3768684   | rs3772458   | rs3776299   |
| rs3749117   | rs3752531   | rs3757384   | rs3760739   | rs3764824   | rs3768716   | rs3772556   | rs3776414   |
| rs3749147   | rs3752630   | rs3757385   | rs3760744   | rs3764913   | rs3768751   | rs377257008 | rs377648080 |
| rs3749171   | rs3752664   | rs3757387   | rs3760775   | rs3765000   | rs3768792   | rs3772571   | rs3776573   |
| rs3749172   | rs3752728   | rs3757493   | rs3760776   | rs3765041   | rs3768812   | rs3772840   | rs3776712   |
| rs3749180   | rs375286460 | rs3757607   | rs3760782   | rs3765066   | rs3768844   | rs3772882   | rs3776754   |

|             |           |           |           |           |           |             |           |
|-------------|-----------|-----------|-----------|-----------|-----------|-------------|-----------|
| rs3776864   | rs3782652 | rs3786712 | rs3790608 | rs3796028 | rs3801427 | rs38055     | rs3809634 |
| rs3777095   | rs3782679 | rs3786722 | rs3790609 | rs3796051 | rs3801776 | rs3805663   | rs3809646 |
| rs3777184   | rs378273  | rs3786723 | rs3790619 | rs3796133 | rs3801887 | rs3805859   | rs3809770 |
| rs3777189   | rs3782735 | rs3786749 | rs3790672 | rs3796224 | rs3801995 | rs3806114   | rs3809789 |
| rs3777200   | rs3782787 | rs3786800 | rs3790844 | rs3796320 | rs3802173 | rs3806156   | rs3809790 |
| rs3777404   | rs3782860 | rs3786839 | rs3791020 | rs3796386 | rs3802177 | rs3806243   | rs3809822 |
| rs377741153 | rs3782886 | rs3786897 | rs3791033 | rs3796517 | rs3802219 | rs3806308   | rs3809857 |
| rs377763    | rs3782889 | rs3786898 | rs3791221 | rs3796529 | rs3802225 | rs3806315   | rs3809912 |
| rs3777722   | rs3783007 | rs3787030 | rs379123  | rs3796562 | rs3802228 | rs3806400   | rs3809924 |
| rs3777755   | rs3783177 | rs3787073 | rs3791478 | rs3796587 | rs3802230 | rs380654    | rs3810068 |
| rs3778028   | rs3783300 | rs3787075 | rs3791553 | rs3796592 | rs3802457 | rs3806624   | rs3810115 |
| rs3778279   | rs3783350 | rs3787080 | rs379157  | rs3796604 | rs3802517 | rs3806701   | rs3810143 |
| rs3778519   | rs3783436 | rs3787089 | rs3791675 | rs3796606 | rs3802548 | rs3806702   | rs3810291 |
| rs3778523   | rs3783449 | rs3787096 | rs3791679 | rs3796618 | rs3802569 | rs3806843   | rs3810304 |
| rs3778546   | rs378352  | rs3787100 | rs3791686 | rs3796619 | rs3802597 | rs3806932   | rs3810328 |
| rs3778607   | rs3783531 | rs3787112 | rs3791687 | rs3796727 | rs3802604 | rs3806933   | rs3810353 |
| rs3778753   | rs3783553 | rs3787184 | rs3791699 | rs3796822 | rs3802662 | rs3807051   | rs3810354 |
| rs3778872   | rs3783654 | rs3787186 | rs3791702 | rs3796839 | rs380267  | rs3807121   | rs3810449 |
| rs3778934   | rs3783727 | rs3787271 | rs3791760 | rs3796944 | rs3802826 | rs3807306   | rs3810478 |
| rs3779195   | rs3783747 | rs3787317 | rs3791979 | rs3796948 | rs3802842 | rs3807307   | rs3810483 |
| rs3779272   | rs3783782 | rs3787374 | rs3791995 | rs3797051 | rs3802849 | rs3807375   | rs3810496 |
| rs3779273   | rs3783820 | rs3787480 | rs3792016 | rs37972   | rs3802850 | rs380743    | rs3810737 |
| rs3779354   | rs3783890 | rs3787513 | rs3792026 | rs3797390 | rs380286  | rs3807597   | rs3810801 |
| rs3779381   | rs3784099 | rs3787823 | rs3792109 | rs3797535 | rs3802920 | rs3807651   | rs3810818 |
| rs3779420   | rs3784138 | rs3788191 | rs3792142 | rs3797537 | rs3802924 | rs3807865   | rs3810936 |
| rs3779456   | rs3784169 | rs378825  | rs3792188 | rs37976   | rs3802932 | rs3807866   | rs3811038 |
| rs3779505   | rs3784192 | rs3788449 | rs3792366 | rs3797678 | rs3802933 | rs3807931   | rs3811046 |
| rs3780129   | rs378421  | rs3788504 | rs3792751 | rs3797733 | rs3802999 | rs3807945   | rs3811047 |
| rs3780181   | rs3784234 | rs378854  | rs3792752 | rs3797737 | rs3803042 | rs3807989   | rs3811055 |
| rs3780190   | rs3784283 | rs3788556 | rs3792765 | rs3798220 | rs3803070 | rs3807989-A | rs3811125 |
| rs3780204   | rs3784310 | rs3788567 | rs3792783 | rs3798233 | rs3803170 | rs3807997   | rs3811183 |
| rs3780269   | rs3784526 | rs3788568 | rs3792900 | rs3798293 | rs3803266 | rs3808072   | rs3811273 |
| rs3780327   | rs3784589 | rs3788766 | rs3792943 | rs3798345 | rs3803286 | rs3808093   | rs3811444 |
| rs3780378   | rs3784692 | rs3789045 | rs3793079 | rs3798483 | rs38033   | rs380825    | rs3811445 |
| rs3780419   | rs3784710 | rs3789087 | rs3793537 | rs3798519 | rs3803357 | rs3808348   | rs3811473 |
| rs3780474   | rs3784789 | rs3789088 | rs3793577 | rs3798550 | rs3803478 | rs3808426   | rs3811489 |
| rs3780486   | rs3784861 | rs3789129 | rs3793683 | rs379862  | rs3803501 | rs3808439   | rs3811621 |
| rs3780909   | rs3784911 | rs3789134 | rs3793805 | rs3798713 | rs3803522 | rs3808447   | rs3811647 |
| rs3780962   | rs3784924 | rs3789135 | rs3793889 | rs3798722 | rs3803573 | rs3808477   | rs3811935 |
| rs3781058   | rs3785074 | rs3789204 | rs3793917 | rs3798869 | rs3803647 | rs3808502   | rs3811978 |
| rs378108    | rs3785100 | rs3789280 | rs3793947 | rs3798911 | rs3803662 | rs380852    | rs3812035 |
| rs3781085   | rs3785229 | rs3789432 | rs3794060 | rs3799340 | rs3803686 | rs3808520   | rs3812036 |
| rs3781093   | rs3785232 | rs3789577 | rs3794153 | rs3799378 | rs3803689 | rs3808576   | rs3812039 |
| rs3781094   | rs3785234 | rs3789615 | rs379417  | rs3799379 | rs3803700 | rs3808579   | rs3812049 |
| rs3781196   | rs3785237 | rs3789619 | rs3794204 | rs3799380 | rs3803800 | rs3808580   | rs3812111 |
| rs3781262   | rs3785238 | rs3789678 | rs3794205 | rs3799468 | rs3803809 | rs3808609   | rs3812163 |
| rs3781264   | rs3785303 | rs378974  | rs3794620 | rs3799969 | rs3803884 | rs3808645   | rs381218  |
| rs3781291   | rs3785309 | rs3789823 | rs3794621 | rs3800123 | rs380390  | rs3808869   | rs3812275 |
| rs378132    | rs3785356 | rs3789967 | rs3794625 | rs3800227 | rs3803906 | rs3808894   | rs3812281 |
| rs3781339   | rs3785549 | rs3789988 | rs3794695 | rs3800229 | rs3803915 | rs3808942   | rs3812316 |
| rs3781411   | rs3785568 | rs3790076 | rs3794738 | rs3800230 | rs3803956 | rs3808964   | rs3812442 |
| rs3781452   | rs3785574 | rs3790136 | rs3794748 | rs3800283 | rs3804139 | rs3808995   | rs3812479 |
| rs3781454   | rs3785617 | rs3790148 | rs3794752 | rs3800314 | rs3804333 | rs3809060   | rs381254  |
| rs3781458   | rs3785837 | rs3790160 | rs3794809 | rs3800406 | rs3804446 | rs3809095   | rs3812565 |
| rs3781466   | rs3785855 | rs3790163 | rs3794916 | rs3800426 | rs3804476 | rs3809114   | rs3812591 |
| rs3781566   | rs3785856 | rs3790227 | rs3794991 | rs3800461 | rs3804540 | rs3809117   | rs3812594 |
| rs3781619   | rs3785879 | rs3790228 | rs3795046 | rs3800533 | rs3804590 | rs3809128   | rs3812617 |
| rs3781627   | rs3785880 | rs3790286 | rs3795047 | rs3800684 | rs3804610 | rs3809162   | rs381262  |
| rs3781885   | rs3785884 | rs3790315 | rs3795063 | rs3800925 | rs3804640 | rs3809169   | rs3812625 |
| rs3781888   | rs3785961 | rs3790438 | rs3795128 | rs3800963 | rs3804749 | rs3809272   | rs3812828 |
| rs3781913   | rs3786003 | rs3790455 | rs3795310 | rs3800993 | rs3804771 | rs3809297   | rs3812849 |
| rs3781962   | rs3786130 | rs3790553 | rs3795318 | rs3801034 | rs3804772 | rs3809547   | rs3812945 |
| rs3782086   | rs3786228 | rs3790566 | rs3795445 | rs3801081 | rs3804785 | rs3809565   | rs3812984 |
| rs3782089   | rs3786247 | rs3790567 | rs3795503 | rs3801203 | rs3805    | rs3809566   | rs3813135 |
| rs3782122   | rs3786516 | rs3790598 | rs3795556 | rs3801288 | rs3805221 | rs3809569   | rs3813230 |
| rs3782123   | rs3786586 | rs3790604 | rs3795559 | rs3801387 | rs3805301 | rs3809570   | rs3813308 |
| rs3782181   | rs3786680 | rs3790606 | rs3795569 | rs3801407 | rs3805382 | rs3809627   | rs3813356 |

|           |           |           |            |           |           |           |             |
|-----------|-----------|-----------|------------|-----------|-----------|-----------|-------------|
| rs381349  | rs381815  | rs3822868 | rs3826620  | rs3834976 | rs3847063 | rs3851998 | rs3862030   |
| rs3813498 | rs3818361 | rs3822939 | rs3826656  | rs3835100 | rs3847126 | rs3852018 | rs3862145   |
| rs3813522 | rs3818416 | rs3823036 | rs3826667  | rs3835126 | rs3847223 | rs385240  | rs3862188   |
| rs3813565 | rs3818666 | rs3823355 | rs3826692  | rs3835397 | rs3847225 | rs3852789 | rs3862367   |
| rs3813570 | rs3818717 | rs3823379 | rs3826796  | rs383592  | rs3847228 | rs3853119 | rs386243    |
| rs3813579 | rs3818932 | rs3823427 | rs3827066  | rs383603  | rs3847244 | rs3853291 | rs3862628   |
| rs3813582 | rs3818987 | rs3823536 | rs3827181  | rs3836061 | rs3847261 | rs3853445 | rs3862630   |
| rs3813609 | rs3819179 | rs3823572 | rs3827278  | rs383618  | rs3847302 | rs3853476 | rs3862738   |
| rs381365  | rs3819282 | rs3823612 | rs3827335  | rs3836561 | rs3847402 | rs3853750 | rs3863632   |
| rs3813728 | rs3819299 | rs3823624 | rs3827534  | rs3837412 | rs3847479 | rs3853757 | rs386376482 |
| rs3813735 | rs3819306 | rs3823674 | rs3827592  | rs3837681 | rs3847528 | rs3853824 | rs386378951 |
| rs3813803 | rs3819325 | rs3823871 | rs3827760  | rs3838166 | rs3847554 | rs385417  | rs386379169 |
| rs3813948 | rs3819331 | rs3823878 | rs382784   | rs3839234 | rs3847694 | rs385437  | rs386385565 |
| rs3813961 | rs3819405 | rs3823974 | rs3828002  | rs3839706 | rs3847787 | rs385492  | rs386386678 |
| rs3814113 | rs3819457 | rs3824065 | rs3828058  | rs3840870 | rs3847803 | rs3856205 | rs386388546 |
| rs3814120 | rs381949  | rs3824081 | rs3828069  | rs3840872 | rs3847858 | rs3856240 | rs386390894 |
| rs3814212 | rs3819536 | rs3824200 | rs3828101  | rs3840981 | rs3847988 | rs3856261 | rs386395438 |
| rs3814231 | rs3819677 | rs3824344 | rs3828150  | rs3840984 | rs3848125 | rs3856270 | rs386404029 |
| rs3814244 | rs38197   | rs3824347 | rs3828219  | rs3841064 | rs3848370 | rs3856364 | rs3864106   |
| rs3814284 | rs3819720 | rs3824420 | rs3828242  | rs3841079 | rs3848445 | rs3856395 | rs386418874 |
| rs3814333 | rs3819817 | rs3824430 | rs3828309  | rs3841260 | rs3848474 | rs3856396 | rs3864277   |
| rs3814424 | rs3819946 | rs3824459 | rs3828559  | rs3841946 | rs3848511 | rs3856439 | rs3865014   |
| rs3814570 | rs3820028 | rs3824477 | rs3828591  | rs3842397 | rs3848570 | rs3856447 | rs3865018   |
| rs3814707 | rs3820060 | rs3824488 | rs3828755  | rs3842727 | rs3848600 | rs3856464 | rs3865188   |
| rs3814787 | rs3820068 | rs3824535 | rs3828760  | rs3842763 | rs3848662 | rs3856505 | rs3865314   |
| rs3814881 | rs3820071 | rs38246   | rs3828794  | rs3842770 | rs3848715 | rs3856636 | rs3865444   |
| rs3814883 | rs3820201 | rs3824655 | rs3828805  | rs3842942 | rs3848788 | rs3856850 | rs3865453   |
| rs3814922 | rs3820277 | rs3824660 | rs3828840  | rs3843262 | rs3848873 | rs3856920 | rs3866543   |
| rs3814995 | rs3820282 | rs3824662 | rs3828889  | rs3843467 | rs3849046 | rs3856930 | rs3866568   |
| rs381500  | rs3820337 | rs3824667 | rs3828890  | rs3843480 | rs3849374 | rs3857043 | rs386705174 |
| rs3815145 | rs3820500 | rs3824729 | rs3828919  | rs3843481 | rs3849490 | rs3857067 | rs3867239   |
| rs3815156 | rs3820640 | rs3824754 | rs3828922  | rs3843482 | rs3849531 | rs3857429 | rs3867269   |
| rs3815362 | rs3820706 | rs3824755 | rs3829126  | rs3843503 | rs3849570 | rs3857599 | rs3867466   |
| rs3815455 | rs3820888 | rs3824776 | rs3829241  | rs3843540 | rs3849653 | rs3857776 | rs3867477   |
| rs3815573 | rs3820897 | rs3824867 | rs3829251  | rs3843738 | rs3849710 | rs3857914 | rs3867595   |
| rs3815652 | rs3821169 | rs3824874 | rs3829258  | rs3843751 | rs3849724 | rs3857971 | rs3868005   |
| rs3815700 | rs3821236 | rs3824915 | rs3829388  | rs3843905 | rs3849927 | rs3857977 | rs386821292 |
| rs3815768 | rs3821262 | rs3824949 | rs3829639  | rs3843935 | rs3849942 | rs3858145 | rs3868669   |
| rs3815970 | rs3821300 | rs3824987 | rs3829640  | rs3843954 | rs3849943 | rs3858202 | rs3869109   |
| rs3815983 | rs382140  | rs3824999 | rs3829655  | rs3844    | rs3850093 | rs3858281 | rs3869115   |
| rs3816018 | rs3821705 | rs3825061 | rs3829729  | rs3844143 | rs3850167 | rs3858402 | rs3869132   |
| rs3816157 | rs3821709 | rs3825068 | rs3829835  | rs3844438 | rs3850174 | rs3858461 | rs387027    |
| rs3816183 | rs3821838 | rs3825083 | rs3829849  | rs3844510 | rs3850195 | rs3858607 | rs3870341   |
| rs3816193 | rs3821843 | rs3825199 | rs3830041  | rs3844535 | rs3850300 | rs3858704 | rs387137    |
| rs3816415 | rs3821866 | rs3825214 | rs3830423  | rs384478  | rs3850445 | rs3858722 | rs3872707   |
| rs3816449 | rs3821902 | rs3825243 | rs3830738  | rs3845261 | rs3850610 | rs385884  | rs38748     |
| rs3816455 | rs382196  | rs382534  | rs3830771  | rs3845281 | rs3850625 | rs385893  | rs3874943   |
| rs3816470 | rs3821964 | rs3825430 | rs383091   | rs3845302 | rs3850634 | rs3858954 | rs38752     |
| rs3816472 | rs3822020 | rs3825460 | rs38314    | rs3845534 | rs3850651 | rs3859113 | rs3875283   |
| rs38166   | rs3822030 | rs3825566 | rs3831679  | rs3845624 | rs3850699 | rs3859154 | rs387608    |
| rs3816605 | rs3822072 | rs3825568 | rs3831732  | rs3845780 | rs3850736 | rs3859158 | rs387619    |
| rs3816752 | rs38221   | rs3825615 | rs3831733  | rs3845811 | rs385076  | rs3859192 | rs3877930   |
| rs3816767 | rs382210  | rs3825669 | rs3831804  | rs3845817 | rs3850765 | rs3859523 | rs387859    |
| rs3816804 | rs3822224 | rs3825751 | rs3832016  | rs3845843 | rs3850873 | rs3859588 | rs3879293   |
| rs3816988 | rs3822238 | rs3825761 | rs3832126  | rs3845980 | rs3850986 | rs3859931 | rs387976    |
| rs3817198 | rs3822241 | rs3825762 | rs3832127  | rs3846030 | rs3850997 | rs386000  | rs388340    |
| rs3817246 | rs3822259 | rs3825807 | rs3832181  | rs3846287 | rs3851018 | rs3860432 | rs3883952   |
| rs381732  | rs3822411 | rs3825845 | rs3832325  | rs3846425 | rs3851050 | rs3860444 | rs388430    |
| rs3817334 | rs3822593 | rs3825932 | rs3832566  | rs3846449 | rs3851179 | rs3860537 | rs3884606   |
| rs3817407 | rs3822625 | rs3825942 | rs3833116  | rs3846500 | rs3851186 | rs386056  | rs3884613   |
| rs3817428 | rs3822683 | rs3825977 | rs3833321  | rs3846661 | rs3851227 | rs3861100 | rs388466    |
| rs3817588 | rs3822733 | rs3826008 | rs3833490  | rs3846662 | rs3851228 | rs3861113 | rs388484    |
| rs3817621 | rs3822742 | rs382603  | rs3833517  | rs3846663 | rs3851294 | rs3861818 | rs388485    |
| rs3817923 | rs382280  | rs3826043 | rs3833665  | rs3846706 | rs3851296 | rs3861950 | rs3885274   |
| rs3817928 | rs3822854 | rs3826229 | rs3833788  | rs3846730 | rs3851634 | rs3861957 | rs38853     |
| rs3817963 | rs3822855 | rs3826331 | rs38334458 | rs3846828 | rs3851738 | rs3862005 | rs3885307   |
| rs3818042 | rs3822857 | rs3826559 | rs3833469  | rs3846881 | rs3851820 | rs3862006 | rs38855     |



|           |           |           |           |             |             |           |           |
|-----------|-----------|-----------|-----------|-------------|-------------|-----------|-----------|
| rs3885668 | rs390082  | rs3916164 | rs3929448 | rs394571    | rs397731217 | rs3999089 | rs405697  |
| rs38859   | rs3900833 | rs3916222 | rs3929747 | rs394608    | rs397731840 | rs3999543 | rs4057931 |
| rs3886083 | rs3900856 | rs3917211 | rs3929778 | rs3947      | rs397737647 | rs3999544 | rs4058053 |
| rs3886141 | rs3900989 | rs3917254 | rs3930017 | rs3947609   | rs397741132 | rs399970  | rs406001  |
| rs388649  | rs3901151 | rs3917265 | rs3930044 | rs394819    | rs397750039 | rs39998   | rs40602   |
| rs3887059 | rs3901286 | rs3917339 | rs39302   | rs3948495   | rs397773316 | rs399984  | rs406052  |
| rs3887182 | rs3901523 | rs3917532 | rs3930349 | rs3948714   | rs397778224 | rs39999   | rs4060971 |
| rs3887193 | rs3901638 | rs3917539 | rs3931    | rs394872    | rs397778518 | rs4000279 | rs406123  |
| rs3887753 | rs390195  | rs3917545 | rs3931020 | rs3949301   | rs397780227 | rs4002471 | rs4061659 |
| rs3887925 | rs3902035 | rs3917549 | rs3931036 | rs394945    | rs397801989 | rs4002684 | rs406196  |
| rs3888187 | rs3902080 | rs3917775 | rs39312   | rs3949781   | rs397807524 | rs4003412 | rs406204  |
| rs3888190 | rs3902354 | rs3917912 | rs3931397 | rs3950173   | rs397812377 | rs400345  | rs406315  |
| rs3888722 | rs3902751 | rs3917914 | rs393152  | rs3950296   | rs397816850 | rs4006418 | rs406388  |
| rs3889108 | rs3902934 | rs3917922 | rs3931548 | rs3951016   | rs397826789 | rs40067   | rs406413  |
| rs388916  | rs3902951 | rs3917928 | rs393155  | rs3951242   | rs397831028 | rs4007475 | rs4065321 |
| rs3889199 | rs3902952 | rs3917932 | rs3931702 | rs395138    | rs397851545 | rs40075   | rs4065377 |
| rs3889237 | rs3903005 | rs3918226 | rs3931841 | rs3951468   | rs397852991 | rs4007663 | rs406658  |
| rs3890182 | rs3903032 | rs3918292 | rs3931960 | rs395157    | rs397854207 | rs4008347 | rs4066629 |
| rs38902   | rs3903072 | rs3918298 | rs3932048 | rs3952231   | rs397858888 | rs40087   | rs4067    |
| rs389020  | rs3903239 | rs391851  | rs3932549 | rs3952787   | rs397860393 | rs4008953 | rs406761  |
| rs3890298 | rs3903399 | rs391855  | rs3932738 | rs395498    | rs39790     | rs400942  | rs4068540 |
| rs38904   | rs390387  | rs391875  | rs39328   | rs3955311   | rs397933924 | rs40115   | rs406952  |
| rs3890483 | rs390408  | rs391957  | rs3932815 | rs395564    | rs3979376   | rs4012172 | rs407102  |
| rs38906   | rs3904600 | rs3919583 | rs3933326 | rs3956504   | rs397948882 | rs40136   | rs4072037 |
| rs3890609 | rs3904778 | rs3919627 | rs3933376 | rs3956705   | rs397953818 | rs4014195 | rs4072096 |
| rs3890699 | rs3904941 | rs3920498 | rs3933456 | rs3957147   | rs397954080 | rs4014653 | rs4072296 |
| rs3890745 | rs3905000 | rs392079  | rs3933617 | rs3957165   | rs397964890 | rs401526  | rs4072355 |
| rs3890755 | rs3905510 | rs3921    | rs3933955 | rs3957281   | rs397969    | rs401599  | rs4072402 |
| rs3890771 | rs3905668 | rs392134  | rs3934467 | rs3957316   | rs397975200 | rs4016687 | rs4072669 |
| rs3890907 | rs3905706 | rs3922468 | rs3934487 | rs3957356   | rs3980014   | rs401681  | rs4072705 |
| rs3890984 | rs390677  | rs3922628 | rs3934541 | rs3957357   | rs3980078   | rs401746  | rs4072719 |
| rs3891167 | rs3907022 | rs3922671 | rs3934712 | rs3958046   | rs398014146 | rs401754  | rs4072797 |
| rs3891175 | rs3907703 | rs3922735 | rs3934797 | rs395892    | rs398032702 | rs401775  | rs4072825 |
| rs3891424 | rs3909086 | rs3922844 | rs393488  | rs395897    | rs398034853 | rs4018034 | rs4072910 |
| rs3891585 | rs3909256 | rs3922853 | rs3934939 | rs395908    | rs398036404 | rs4018180 | rs4072917 |
| rs3891620 | rs3909258 | rs3922980 | rs3935148 | rs3959554   | rs398051584 | rs401966  | rs4072932 |
| rs3891783 | rs3909281 | rs3923059 | rs3935182 | rs3959569   | rs398062996 | rs40200   | rs4072980 |
| rs3891955 | rs3909436 | rs3923097 | rs3935190 | rs395962    | rs398070924 | rs40202   | rs4073003 |
| rs3892097 | rs3909452 | rs3923113 | rs3935506 | rs3960788   | rs398073595 | rs4020660 | rs4073054 |
| rs3892355 | rs3909553 | rs3923203 | rs3935685 | rs3962370   | rs398090202 | rs4021186 | rs4073153 |
| rs3892630 | rs3909727 | rs3923387 | rs3935716 | rs3962382   | rs398105120 | rs40245   | rs4073221 |
| rs3892895 | rs3910101 | rs3923564 | rs3935792 | rs3962383   | rs3981101   | rs4026608 | rs4073285 |
| rs3893104 | rs391023  | rs3923566 | rs3935996 | rs3963361   | rs398121251 | rs40270   | rs4073288 |
| rs3893275 | rs3910553 | rs3923776 | rs393600  | rs3963364   | rs398121667 | rs4027217 | rs4073416 |
| rs3893463 | rs3911063 | rs3923783 | rs3936040 | rs396341    | rs398217    | rs402940  | rs4073513 |
| rs3893464 | rs391173  | rs3923809 | rs3936093 | rs39635     | rs39841     | rs4029980 | rs407354  |
| rs3894194 | rs391236  | rs3924048 | rs3936305 | rs396354    | rs398474    | rs4034907 | rs4073566 |
| rs3895736 | rs3912392 | rs3924236 | rs3936510 | rs3964723   | rs3985697   | rs403694  | rs4073582 |
| rs3895874 | rs391268  | rs3924282 | rs3936511 | rs3965156   | rs3985863   | rs403814  | rs4073717 |
| rs3896224 | rs391300  | rs3924389 | rs3936840 | rs39654     | rs39862     | rs403825  | rs4073729 |
| rs3896439 | rs3913007 | rs3924869 | rs3936938 | rs396660    | rs3986805   | rs404256  | rs4073770 |
| rs3896594 | rs3913535 | rs3925    | rs3937015 | rs3966775   | rs3987888   | rs40434   | rs4073778 |
| rs3897102 | rs3914132 | rs3925003 | rs3938236 | rs3966800   | rs3993347   | rs4044321 | rs4073791 |
| rs389725  | rs3914188 | rs3925158 | rs3939286 | rs3967200   | rs3993747   | rs40457   | rs4074082 |
| rs3897379 | rs3914628 | rs3925316 | rs3941888 | rs39674     | rs3995090   | rs40465   | rs4074178 |
| rs3897473 | rs3914956 | rs3925331 | rs394199  | rs396755    | rs399593    | rs4046908 | rs4074283 |
| rs3897478 | rs3915060 | rs3925584 | rs3942352 | rs397052    | rs399604    | rs4047777 | rs4074404 |
| rs3897644 | rs391525  | rs3925681 | rs3942852 | rs3970551   | rs3996329   | rs40480   | rs4074448 |
| rs3897821 | rs3915398 | rs3925830 | rs3943077 | rs3971300   | rs3996330   | rs404860  | rs4074453 |
| rs3897877 | rs3915425 | rs3926279 | rs3943093 | rs3972456   | rs3996350   | rs40504   | rs4074478 |
| rs3898618 | rs391543  | rs3926666 | rs394335  | rs3973397   | rs3996352   | rs4052505 | rs4074536 |
| rs389883  | rs3915470 | rs3927404 | rs3943516 | rs3973896   | rs399657    | rs4052755 | rs4074672 |
| rs389884  | rs3915499 | rs3927496 | rs3943667 | rs39745     | rs3996993   | rs405321  | rs4074723 |
| rs3898938 | rs3915773 | rs3927680 | rs3943782 | rs397637    | rs399711    | rs405343  | rs4074726 |
| rs3899582 | rs3915932 | rs392783  | rs3943933 | rs397690986 | rs3997868   | rs405509  | rs4074747 |
| rs3900053 | rs3916    | rs3927966 | rs3945119 | rs397712573 | rs399821    | rs4055121 | rs4074793 |
| rs3900115 | rs3916027 | rs3929422 | rs394563  | rs397730966 | rs3998628   | rs4055791 | rs4074882 |

|           |            |            |            |            |            |            |            |
|-----------|------------|------------|------------|------------|------------|------------|------------|
| rs4074961 | rs409558   | rs412657   | rs41282153 | rs41297531 | rs4132172  | rs4141671  | rs4147929  |
| rs4074995 | rs409620   | rs412658   | rs41282553 | rs4129767  | rs41321950 | rs41416745 | rs4147940  |
| rs4075018 | rs409645   | rs41265930 | rs41282676 | rs41298085 | rs4132228  | rs4141830  | rs4148005  |
| rs4075154 | rs409696   | rs41266779 | rs41282788 | rs41298087 | rs4132378  | rs4141885  | rs4148008  |
| rs4075225 | rs4097319  | rs41266821 | rs4128297  | rs41298373 | rs4132385  | rs4141973  | rs4148152  |
| rs4075326 | rs4097490  | rs41266839 | rs4128298  | rs41298450 | rs4132462  | rs4142082  | rs4148155  |
| rs4075349 | rs4097679  | rs41267086 | rs41283425 | rs4129858  | rs4132568  | rs4142110  | rs4148191  |
| rs4075350 | rs409801   | rs41267397 | rs4128364  | rs41298997 | rs4132601  | rs41421845 | rs4148247  |
| rs4075464 | rs4098854  | rs41267675 | rs41283642 | rs41299637 | rs4132670  | rs4142248  | rs4148323  |
| rs4075958 | rs4098996  | rs41267807 | rs4128399  | rs41300116 | rs4132748  | rs4142393  | rs4148324  |
| rs4075970 | rs4099209  | rs41267809 | rs41284155 | rs4130023  | rs4132934  | rs4142441  | rs4148325  |
| rs4076118 | rs4099245  | rs41267883 | rs41284294 | rs41300331 | rs4133019  | rs4142591  | rs4148435  |
| rs4076425 | rs409950   | rs41268099 | rs4128436  | rs41300435 | rs4133213  | rs4142889  | rs4148436  |
| rs4076427 | rs409997   | rs41268474 | rs41284366 | rs4130047  | rs41332544 | rs4142967  | rs4148441  |
| rs4076453 | rs4101061  | rs41268753 | rs41284471 | rs41300805 | rs4133395  | rs4142995  | rs4148445  |
| rs4076457 | rs410150   | rs41268896 | rs41284486 | rs41300938 | rs41334545 | rs4143094  | rs41485546 |
| rs4076542 | rs410180   | rs41268905 | rs41284816 | rs41301297 | rs413348   | rs4143175  | rs4148646  |
| rs4076764 | rs4102203  | rs41268928 | rs41284828 | rs41301394 | rs4133529  | rs4143229  | rs4148757  |
| rs4076834 | rs4102217  | rs41269028 | rs4128507  | rs413024   | rs41336052 | rs41432345 | rs4148808  |
| rs4076844 | rs4105144  | rs41269133 | rs41285280 | rs41302559 | rs41337248 | rs41433250 | rs4148812  |
| rs4076852 | rs410671   | rs41269255 | rs4128561  | rs41302673 | rs41337747 | rs4143332  | rs4148826  |
| rs4076877 | rs410867   | rs41270066 | rs41286076 | rs41303343 | rs4134058  | rs4143333  | rs4148856  |
| rs4077093 | rs410876   | rs4127124  | rs41286287 | rs4130344  | rs41341749 | rs4143339  | rs4148863  |
| rs4077129 | rs4109346  | rs41271299 | rs41286548 | rs41303495 | rs41342147 | rs41434449 | rs4148965  |
| rs4077194 | rs4109437  | rs41271357 | rs41286710 | rs41303501 | rs4134466  | rs41434646 | rs4149014  |
| rs4077277 | rs4109837  | rs41271473 | rs41286801 | rs41303899 | rs413474   | rs4143530  | rs4149056  |
| rs4077285 | rs4110517  | rs41271951 | rs41287142 | rs41304257 | rs4134826  | rs4143691  | rs4149067  |
| rs4077410 | rs411079   | rs41272086 | rs4128725  | rs41304550 | rs4134963  | rs4143832  | rs4149080  |
| rs4077450 | rs4112788  | rs41272114 | rs41287280 | rs41305321 | rs4135240  | rs41439051 | rs4149081  |
| rs4077451 | rs411535   | rs41272321 | rs41287361 | rs41305473 | rs4135247  | rs4144027  | rs4149083  |
| rs4077464 | rs411604   | rs41272536 | rs4128744  | rs4130548  | rs41352752 | rs41441744 | rs4149202  |
| rs4077468 | rs4116669  | rs41273040 | rs412884   | rs41305481 | rs41355452 | rs4144266  | rs41492347 |
| rs4077515 | rs41174    | rs41273140 | rs4128868  | rs41306249 | rs41355649 | rs41444048 | rs4149261  |
| rs4077582 | rs41177    | rs41273221 | rs41288885 | rs41306524 | rs41356645 | rs41444548 | rs4149262  |
| rs4077636 | rs411840   | rs41273806 | rs41288889 | rs41306688 | rs41357746 | rs4144502  | rs4149268  |
| rs4077666 | rs41190    | rs41274050 | rs41289512 | rs4130686  | rs41360247 | rs41445146 | rs4149307  |
| rs4077678 | rs411919   | rs41274072 | rs41289586 | rs41307187 | rs41363245 | rs4144686  | rs4149310  |
| rs4077711 | rs411988   | rs41274867 | rs41290100 | rs41307233 | rs41364946 | rs4144782  | rs4149433  |
| rs4078186 | rs412000   | rs4127499  | rs41290108 | rs4130764  | rs41366756 | rs4144797  | rs4149576  |
| rs4078216 | rs412104   | rs41275110 | rs41290120 | rs41308048 | rs41369048 | rs4144829  | rs4149577  |
| rs4078279 | rs412118   | rs41275422 | rs41290289 | rs41308092 | rs41372049 | rs4144892  | rs4149584  |
| rs4078304 | rs41214    | rs41276588 | rs41290587 | rs4130827  | rs41374152 | rs41452950 | rs41497646 |
| rs4078978 | rs4121404  | rs412768   | rs4129073  | rs41308558 | rs41377546 | rs4145394  | rs4149909  |
| rs4079366 | rs4121508  | rs41277236 | rs4129134  | rs41308746 | rs41378347 | rs4145443  | rs414992   |
| rs407954  | rs4121823  | rs412776   | rs41291550 | rs41309367 | rs41379545 | rs414546   | rs41501452 |
| rs4081724 | rs4121827  | rs41277978 | rs4129177  | rs41310053 | rs41384544 | rs4145487  | rs4150196  |
| rs4081747 | rs4121878  | rs41278045 | rs41291770 | rs41310284 | rs41393947 | rs41455947 | rs4150197  |
| rs4081947 | rs4122352  | rs41278174 | rs41291794 | rs41310573 | rs41396445 | rs4145717  | rs4150210  |
| rs4082052 | rs412243   | rs41278232 | rs41292412 | rs41311445 | rs41398344 | rs4145878  | rs4150214  |
| rs4082244 | rs412302   | rs41278571 | rs4129267  | rs41312411 | rs413988   | rs4145952  | rs4150221  |
| rs4082413 | rs412332   | rs41278695 | rs41292776 | rs41312993 | rs4140574  | rs4146003  | rs4150222  |
| rs408243  | rs4123668  | rs41278845 | rs41292808 | rs41313250 | rs4140646  | rs41461152 | rs41503    |
| rs4082793 | rs4123853  | rs41278853 | rs41292864 | rs41313381 | rs4140685  | rs4146336  | rs4150314  |
| rs4082919 | rs412464   | rs41279633 | rs41293013 | rs41313926 | rs4140762  | rs4146385  | rs4150579  |
| rs4083463 | rs41259144 | rs41279716 | rs41293179 | rs413141   | rs4140770  | rs4146429  | rs4150581  |
| rs4084164 | rs41263828 | rs41279732 | rs4129322  | rs41314284 | rs4140799  | rs4146669  | rs415064   |
| rs4085613 | rs41263967 | rs41279738 | rs41293330 | rs41314453 | rs4140962  | rs4146675  | rs4150642  |
| rs4086075 | rs41264207 | rs41280005 | rs41293836 | rs4131568  | rs4141001  | rs4146819  | rs41506447 |
| rs4086116 | rs41264285 | rs41280378 | rs41293864 | rs4131583  | rs41411047 | rs4146922  | rs4150794  |
| rs4086663 | rs41264467 | rs41280463 | rs41293883 | rs41315846 | rs4141153  | rs4146926  | rs41508744 |
| rs408825  | rs41264630 | rs41280733 | rs41294271 | rs41316003 | rs4141194  | rs4147108  | rs4151120  |
| rs4090240 | rs41264869 | rs41281112 | rs41294858 | rs41316204 | rs41412647 | rs4147157  | rs41512448 |
| rs4090390 | rs41264915 | rs41281637 | rs4129585  | rs41316748 | rs4141278  | rs4147359  | rs4151657  |
| rs409125  | rs41264945 | rs41281858 | rs41295912 | rs41317270 | rs4141410  | rs41475048 | rs4151659  |
| rs4092465 | rs41265094 | rs4128205  | rs41295942 | rs41317993 | rs4141463  | rs4147542  | rs4151665  |
| rs4093218 | rs41265133 | rs41282065 | rs4129628  | rs4131987  | rs4141632  | rs41475954 | rs4151667  |
| rs4093840 | rs41265665 | rs41282145 | rs41297163 | rs41320847 | rs4141663  | rs4147915  | rs4151669  |

|            |           |           |           |           |           |           |           |
|------------|-----------|-----------|-----------|-----------|-----------|-----------|-----------|
| rs4151671  | rs42039   | rs42377   | rs4242224 | rs4252665 | rs4264571 | rs4279348 | rs4293803 |
| rs415182   | rs42042   | rs4237798 | rs4242244 | rs4252707 | rs42648   | rs427943  | rs4294134 |
| rs41520844 | rs42043   | rs4237845 | rs424232  | rs425277  | rs4264932 | rs4279944 | rs4294149 |
| rs41520848 | rs42044   | rs4237963 | rs4242382 | rs42528   | rs4265114 | rs4280164 | rs4294422 |
| rs41522849 | rs420957  | rs4238013 | rs4242384 | rs4253238 | rs4265116 | rs428017  | rs42945   |
| rs41523449 | rs421114  | rs4238020 | rs4242470 | rs4253248 | rs4265125 | rs428022  | rs4294610 |
| rs41526344 | rs421168  | rs4238331 | rs42425   | rs4253252 | rs4266144 | rs4280242 | rs4294611 |
| rs41529445 | rs421211  | rs4238428 | rs4242592 | rs4253276 | rs4266290 | rs4280597 | rs4294650 |
| rs41530644 | rs421215  | rs4238585 | rs4242906 | rs4253282 | rs4266430 | rs428073  | rs429479  |
| rs41543314 | rs42125   | rs4238620 | rs4243084 | rs4253283 | rs4266606 | rs4281320 | rs4294980 |
| rs41546314 | rs421284  | rs4238686 | rs4243085 | rs4253305 | rs4266671 | rs4281707 | rs4295    |
| rs41552714 | rs421629  | rs4238755 | rs4243400 | rs4253311 | rs4266763 | rs4281782 | rs429539  |
| rs41552812 | rs421983  | rs4238818 | rs4243617 | rs4253399 | rs4267058 | rs4281874 | rs4295627 |
| rs41553512 | rs422068  | rs4238961 | rs4243971 | rs4253416 | rs4267163 | rs4282028 | rs4295919 |
| rs41556118 | rs42210   | rs4239020 | rs4244029 | rs4253417 | rs426736  | rs4282339 | rs4295981 |
| rs41559    | rs42235   | rs4239060 | rs4244354 | rs4253421 | rs426810  | rs4282438 | rs429608  |
| rs41563    | rs42238   | rs4239072 | rs4244370 | rs4253755 | rs4268544 | rs428308  | rs4296102 |
| rs41563615 | rs422421  | rs4239207 | rs4244457 | rs4253772 | rs4268748 | rs4283754 | rs4296106 |
| rs415651   | rs4227    | rs4239222 | rs4244612 | rs4254438 | rs426975  | rs4284061 | rs4296170 |
| rs415890   | rs42271   | rs4239232 | rs4244804 | rs4254526 | rs4269772 | rs4284600 | rs4296389 |
| rs415895   | rs422951  | rs4239252 | rs4244808 | rs4254591 | rs4269847 | rs4284954 | rs429694  |
| rs415929   | rs42302   | rs423927  | rs4245150 | rs4254917 | rs4269995 | rs4285028 | rs4296977 |
| rs415997   | rs423135  | rs4239275 | rs4245154 | rs425535  | rs4270038 | rs4285654 | rs4297946 |
| rs416223   | rs4233093 | rs4239386 | rs4245255 | rs4255379 | rs427044  | rs4285804 | rs4298514 |
| rs416258   | rs4233168 | rs4239436 | rs4245338 | rs4255510 | rs4270551 | rs4286082 | rs4298601 |
| rs416350   | rs4233210 | rs4239439 | rs424539  | rs4255791 | rs4271063 | rs4286272 | rs4298759 |
| rs416425   | rs4233366 | rs4239440 | rs4245555 | rs4255830 | rs4271249 | rs4286447 | rs4298806 |
| rs416633   | rs4233430 | rs4239504 | rs4245595 | rs4256018 | rs4271693 | rs4286632 | rs4298967 |
| rs416675   | rs4233450 | rs4239538 | rs4245739 | rs4256159 | rs4272    | rs4286946 | rs4299103 |
| rs416867   | rs4233486 | rs423955  | rs4245791 | rs4256842 | rs4272232 | rs4287174 | rs4299116 |
| rs416981   | rs4233567 | rs4239651 | rs4245930 | rs4256980 | rs427230  | rs4287304 | rs4299136 |
| rs417054   | rs4233583 | rs4239702 | rs4246036 | rs4257266 | rs427248  | rs4287436 | rs429921  |
| rs417096   | rs4233710 | rs4239724 | rs4246064 | rs4257287 | rs4272628 | rs4287603 | rs4299301 |
| rs417237   | rs4233789 | rs42398   | rs4246129 | rs4257903 | rs4272720 | rs4287822 | rs4299376 |
| rs417278   | rs4233937 | rs424029  | rs4246167 | rs4257931 | rs4272977 | rs4287972 | rs4299951 |
| rs41741    | rs4233949 | rs4240326 | rs4246215 | rs4257994 | rs4273010 | rs4288197 | rs4300326 |
| rs41748    | rs4234100 | rs4240356 | rs4246224 | rs4258142 | rs4273077 | rs4288356 | rs4300734 |
| rs417743   | rs4234532 | rs4240361 | rs4246242 | rs4258526 | rs4273169 | rs4288413 | rs430096  |
| rs41785    | rs4234589 | rs4240362 | rs4246243 | rs4258599 | rs4273371 | rs4288924 | rs4302451 |
| rs417968   | rs4234633 | rs4240470 | rs4246268 | rs4258701 | rs427370  | rs4289133 | rs4302704 |
| rs418007   | rs4234798 | rs4240520 | rs4246302 | rs425903  | rs4273712 | rs428925  | rs430329  |
| rs418053   | rs4235479 | rs4240561 | rs4246307 | rs4259951 | rs4273729 | rs4289378 | rs4303473 |
| rs418150   | rs4235482 | rs4240624 | rs4246511 | rs4260306 | rs427394  | rs4290163 | rs4303899 |
| rs418464   | rs4235642 | rs4240637 | rs4246529 | rs4260308 | rs4274112 | rs429017  | rs4304077 |
| rs418635   | rs4236237 | rs4240748 | rs4246598 | rs4260345 | rs4274337 | rs4290286 | rs4304216 |
| rs418664   | rs4236274 | rs4240789 | rs4246688 | rs4260523 | rs4274916 | rs42905   | rs430437  |
| rs418939   | rs4236489 | rs4240791 | rs4246793 | rs4261101 | rs4275190 | rs4290852 | rs4304588 |
| rs419010   | rs4236601 | rs4240792 | rs4246905 | rs4261353 | rs4275621 | rs4290977 | rs4304650 |
| rs419076   | rs4236673 | rs4240801 | rs4247364 | rs4261436 | rs4275784 | rs4291    | rs4304924 |
| rs419132   | rs4236709 | rs4240802 | rs4247374 | rs4261897 | rs4275804 | rs4291002 | rs4304932 |
| rs419137   | rs423674  | rs4240895 | rs4248154 | rs4261913 | rs4276264 | rs4291276 | rs4305    |
| rs419208   | rs4236746 | rs4240896 | rs4248166 | rs4262    | rs4276341 | rs4291350 | rs4305019 |
| rs419261   | rs4236926 | rs4240897 | rs42490   | rs4262079 | rs4276421 | rs4291477 | rs4305276 |
| rs419291   | rs4237036 | rs4240927 | rs424971  | rs4262293 | rs4276643 | rs4291487 | rs4305317 |
| rs419392   | rs4237037 | rs4240944 | rs425102  | rs4262465 | rs427691  | rs429150  | rs4305348 |
| rs419595   | rs4237108 | rs4241122 | rs425105  | rs4262520 | rs427731  | rs42916   | rs430549  |
| rs419677   | rs4237133 | rs4241349 | rs4251424 | rs4262652 | rs4277405 | rs4291791 | rs4305701 |
| rs419842   | rs4237150 | rs4241484 | rs4251697 | rs4262739 | rs4277413 | rs4291964 | rs4305732 |
| rs42016    | rs423718  | rs4241505 | rs42517   | rs4262946 | rs427754  | rs429216  | rs4306343 |
| rs420259   | rs4237268 | rs42417   | rs4251739 | rs4263037 | rs4277680 | rs4292285 | rs4306527 |
| rs420271   | rs4237284 | rs4241816 | rs4252109 | rs4263041 | rs4278237 | rs4292955 | rs4307059 |
| rs42032    | rs42374   | rs4241818 | rs4252129 | rs4263475 | rs4278546 | rs4292998 | rs4307239 |
| rs42033    | rs4237540 | rs4241819 | rs4252134 | rs426349  | rs4278628 | rs4293393 | rs430727  |
| rs420332   | rs4237543 | rs4241964 | rs4252185 | rs4263839 | rs4279    | rs429358  | rs4307732 |
| rs42034    | rs4237555 | rs4242099 | rs4252198 | rs4264267 | rs4279114 | rs429360  | rs4307773 |
| rs42035    | rs4237579 | rs4242161 | rs4252505 | rs4264325 | rs4279174 | rs4293777 | rs4308    |
| rs42038    | rs4237643 | rs4242182 | rs4252548 | rs4264433 | rs4279230 | rs42938   | rs4308051 |

|           |           |           |           |           |           |           |           |
|-----------|-----------|-----------|-----------|-----------|-----------|-----------|-----------|
| rs4308124 | rs4325151 | rs434216  | rs4360891 | rs4377898 | rs4391200 | rs440837  | rs442115  |
| rs4308141 | rs4325427 | rs4342163 | rs436090  | rs4378243 | rs4391701 | rs4408495 | rs4421172 |
| rs4308325 | rs4325479 | rs4342312 | rs4360998 | rs4378355 | rs4391797 | rs4408545 | rs4421206 |
| rs4308415 | rs4325706 | rs4342401 | rs4361609 | rs4378600 | rs4391802 | rs4408777 | rs4421280 |
| rs4308464 | rs4325816 | rs4342822 | rs4362    | rs4378601 | rs4393147 | rs4408817 | rs442177  |
| rs4308481 | rs4325907 | rs4342901 | rs4362358 | rs4378729 | rs4393429 | rs440932  | rs4421883 |
| rs4308634 | rs4326010 | rs4343    | rs4362360 | rs4378991 | rs439401  | rs4409764 | rs4422049 |
| rs4309038 | rs4326350 | rs4343858 | rs4362367 | rs4378999 | rs4394488 | rs4409766 | rs4422151 |
| rs4309155 | rs4326656 | rs4343996 | rs4362519 | rs4379175 | rs4394754 | rs4409785 | rs4422272 |
| rs4309187 | rs4326724 | rs4344    | rs4362541 | rs4379368 | rs4394914 | rs4410282 | rs4422723 |
| rs4309622 | rs4327090 | rs4344931 | rs4363059 | rs4379464 | rs4395148 | rs4410607 | rs442291  |
| rs4310653 | rs4327143 | rs4345121 | rs4363285 | rs4379692 | rs4395179 | rs4410636 | rs442309  |
| rs4310804 | rs4327428 | rs434558  | rs4363385 | rs4379706 | rs439523  | rs4410768 | rs4423214 |
| rs4310926 | rs4328149 | rs4345778 | rs4363657 | rs4379723 | rs4395384 | rs4410790 | rs4423373 |
| rs4310973 | rs4328700 | rs434578  | rs4363781 | rs4379840 | rs4395467 | rs4410871 | rs442376  |
| rs4310999 | rs4328703 | rs4345897 | rs4364259 | rs4379896 | rs4395620 | rs4411112 | rs4423856 |
| rs4311080 | rs4328757 | rs4346062 | rs4364717 | rs4380028 | rs4395728 | rs4411129 | rs4424066 |
| rs4311394 | rs4328821 | rs4346064 | rs436483  | rs4380187 | rs4395853 | rs4411173 | rs4424296 |
| rs4311947 | rs4329    | rs4346385 | rs4364959 | rs4380261 | rs4396457 | rs4411227 | rs442439  |
| rs4311997 | rs4329147 | rs4346585 | rs4365199 | rs438035  | rs4396680 | rs4411245 | rs442467  |
| rs4312035 | rs4329504 | rs4347266 | rs4365329 | rs4380442 | rs4396807 | rs4411303 | rs4424705 |
| rs4312081 | rs4330281 | rs4347561 | rs4365348 | rs4380538 | rs4396896 | rs4411675 | rs4424827 |
| rs4312833 | rs433061  | rs4347883 | rs4366055 | rs4380702 | rs4396983 | rs4411786 | rs4424943 |
| rs4313034 | rs433074  | rs434844  | rs436609  | rs4380763 | rs4397467 | rs4411981 | rs442495  |
| rs4313119 | rs4331426 | rs4348675 | rs4366093 | rs4380874 | rs439749  | rs4412150 | rs4425006 |
| rs431329  | rs4331524 | rs434943  | rs4366152 | rs4380895 | rs4397637 | rs4412193 | rs4425224 |
| rs431362  | rs4332037 | rs4349489 | rs4366267 | rs4381172 | rs4397962 | rs4412362 | rs4425734 |
| rs4313803 | rs4332347 | rs4349753 | rs4367880 | rs4381241 | rs4397977 | rs4413223 | rs4425772 |
| rs431420  | rs4332427 | rs4349809 | rs4368253 | rs4381563 | rs4398228 | rs4413345 | rs4426183 |
| rs4314918 | rs4332428 | rs4349859 | rs4368453 | rs4382152 | rs4398538 | rs4413433 | rs4426420 |
| rs4315565 | rs4332760 | rs4350231 | rs4368963 | rs4382480 | rs4398584 | rs4413518 | rs4426644 |
| rs4316067 | rs4333851 | rs4350272 | rs4369416 | rs4382584 | rs4398922 | rs4413606 | rs4426778 |
| rs4316475 | rs4333882 | rs435077  | rs4369638 | rs4382592 | rs4399146 | rs4413619 | rs4427576 |
| rs431699  | rs433402  | rs4351    | rs4369779 | rs4383083 | rs4399402 | rs4413892 | rs4427849 |
| rs431722  | rs4334028 | rs4352658 | rs4369815 | rs438339  | rs4399570 | rs4414016 | rs4427983 |
| rs4317448 | rs4334415 | rs435306  | rs4369924 | rs4383453 | rs4400597 | rs4414033 | rs4428159 |
| rs4317556 | rs4334503 | rs4353250 | rs4370258 | rs4383468 | rs4400599 | rs4414209 | rs4430796 |
| rs4318395 | rs4334972 | rs4353253 | rs4370753 | rs4383974 | rs4400674 | rs441460  | rs4430895 |
| rs4318431 | rs4335    | rs4353638 | rs4370783 | rs4384309 | rs440095  | rs441467  | rs4430933 |
| rs4318510 | rs4335126 | rs4354713 | rs437112  | rs4384608 | rs4401134 | rs4414887 | rs443099  |
| rs4318611 | rs4335155 | rs4354968 | rs437115  | rs4384683 | rs440150  | rs4415084 | rs4431051 |
| rs4318980 | rs4335411 | rs4354991 | rs4371408 | rs4385059 | rs4401606 | rs4415679 | rs4431325 |
| rs431901  | rs4336042 | rs4355178 | rs4371736 | rs4385401 | rs4401911 | rs4416442 | rs4431553 |
| rs431930  | rs4336173 | rs4355273 | rs4372005 | rs4385425 | rs4402166 | rs4416724 | rs443198  |
| rs4319365 | rs4336470 | rs4355757 | rs4372224 | rs4385527 | rs4402323 | rs441695  | rs4432163 |
| rs4319473 | rs4336505 | rs4355801 | rs4372354 | rs438568  | rs4402351 | rs4417256 | rs443222  |
| rs4319547 | rs4336553 | rs4355822 | rs4372836 | rs4385883 | rs4402521 | rs4417704 | rs4432271 |
| rs431978  | rs433704  | rs4356188 | rs4372913 | rs4386084 | rs4402530 | rs4417855 | rs4432367 |
| rs432002  | rs4337088 | rs4356203 | rs4373007 | rs438613  | rs4402589 | rs4418079 | rs4432412 |
| rs4320032 | rs4337252 | rs4356932 | rs4373374 | rs4386139 | rs440277  | rs441810  | rs4432538 |
| rs4320356 | rs433750  | rs4357030 | rs437376  | rs4386322 | rs4402860 | rs4418214 | rs4434138 |
| rs4320361 | rs4338089 | rs4357117 | rs4373814 | rs4386936 | rs440292  | rs4418563 | rs443440  |
| rs4320420 | rs4338381 | rs4357263 | rs4373974 | rs4387163 | rs4402960 | rs4418639 | rs4434553 |
| rs4320563 | rs4338740 | rs4357716 | rs4373984 | rs4387287 | rs4403658 | rs4418728 | rs443459  |
| rs4320727 | rs4338987 | rs435775  | rs4374177 | rs4387871 | rs4404022 | rs441890  | rs4434676 |
| rs4321325 | rs4339163 | rs4357783 | rs4374298 | rs438811  | rs4404097 | rs4419127 | rs4434960 |
| rs4321846 | rs4339281 | rs4357853 | rs4374383 | rs4388249 | rs440446  | rs4419359 | rs4434990 |
| rs432200  | rs4339600 | rs4358081 | rs4374667 | rs4388254 | rs4405620 | rs4419361 | rs4435118 |
| rs4322101 | rs4339993 | rs4358110 | rs4374942 | rs438830  | rs4405857 | rs4419475 | rs4435363 |
| rs432256  | rs4340104 | rs4358358 | rs4375003 | rs4388514 | rs4406147 | rs4420029 | rs4436359 |
| rs4323050 | rs434034  | rs4359033 | rs4375148 | rs4388516 | rs4406273 | rs4420065 | rs4436614 |
| rs4323860 | rs434040  | rs435964  | rs4375492 | rs4388736 | rs4406666 | rs4420291 | rs4436712 |
| rs4324362 | rs4340504 | rs4360170 | rs4375747 | rs438885  | rs4406737 | rs4420311 | rs4436817 |
| rs4324483 | rs4340628 | rs4360309 | rs4376462 | rs4388979 | rs440712  | rs4420522 | rs4437022 |
| rs4324798 | rs4341754 | rs4360450 | rs4377290 | rs4389834 | rs4407350 | rs4420638 | rs4437656 |
| rs4325    | rs4341955 | rs4360494 | rs4377346 | rs4390169 | rs4407483 | rs4420855 | rs4438499 |
| rs4325093 | rs434206  | rs4360524 | rs4377525 | rs4391122 | rs4407894 | rs4421114 | rs443863  |

|           |           |           |           |           |           |           |            |
|-----------|-----------|-----------|-----------|-----------|-----------|-----------|------------|
| rs4440243 | rs4455225 | rs4470077 | rs448008  | rs4494297 | rs4508164 | rs452825  | rs4542449  |
| rs4440481 | rs4455396 | rs4470197 | rs4480339 | rs4494298 | rs4509059 | rs4529173 | rs4542747  |
| rs4440558 | rs4455680 | rs4470295 | rs4480613 | rs449454  | rs4510068 | rs4529254 | rs4542783  |
| rs4440591 | rs4455710 | rs4470328 | rs4480762 | rs4494548 | rs4510419 | rs4529296 | rs45430    |
| rs4441044 | rs4455790 | rs4470366 | rs4480845 | rs4495234 | rs4510639 | rs452932  | rs4543050  |
| rs4441471 | rs4456244 | rs44707   | rs4481150 | rs4495442 | rs4510766 | rs4529677 | rs4543123  |
| rs4441609 | rs4456287 | rs4470745 | rs4481233 | rs4495484 | rs4511431 | rs4529894 | rs4543289  |
| rs4441632 | rs4456769 | rs4470903 | rs4481462 | rs4495740 | rs451157  | rs4529910 | rs4543312  |
| rs444207  | rs4456788 | rs4470914 | rs4481887 | rs4496150 | rs4511593 | rs4530278 | rs4543592  |
| rs444210  | rs445684  | rs4470970 | rs448203  | rs4496284 | rs4511696 | rs4530517 | rs4543739  |
| rs4442212 | rs4457053 | rs447124  | rs4482463 | rs449647  | rs4512652 | rs4530527 | rs45443194 |
| rs4442348 | rs4457242 | rs4471313 | rs4482537 | rs4496693 | rs4512994 | rs4530683 | rs4544423  |
| rs4442541 | rs4457391 | rs4471613 | rs4482636 | rs4496939 | rs4513093 | rs4530754 | rs45444697 |
| rs4442732 | rs445754  | rs4471666 | rs4482863 | rs4497562 | rs4513773 | rs4530873 | rs45445495 |
| rs4442925 | rs4457620 | rs4471670 | rs4483209 | rs449789  | rs451417  | rs4530903 | rs45446698 |
| rs4442975 | rs4458044 | rs4471723 | rs448332  | rs4497915 | rs4514364 | rs4531346 | rs45448095 |
| rs4443016 | rs4458205 | rs4472028 | rs448378  | rs4498196 | rs4514918 | rs4531856 | rs45448191 |
| rs4443100 | rs4458215 | rs4472337 | rs448385  | rs4498258 | rs4514955 | rs4531890 | rs4545054  |
| rs4443403 | rs4458235 | rs4472353 | rs4483990 | rs4498364 | rs4515482 | rs453193  | rs45452892 |
| rs4443656 | rs4458506 | rs4472446 | rs4484214 | rs4498834 | rs4515509 | rs4532315 | rs45453598 |
| rs4443996 | rs4458523 | rs4472504 | rs4484297 | rs4499118 | rs4516268 | rs4532510 | rs4545434  |
| rs4444073 | rs445925  | rs4472734 | rs4484511 | rs4499232 | rs451637  | rs453301  | rs4545476  |
| rs4444227 | rs4459316 | rs4472800 | rs4484922 | rs4499262 | rs451643  | rs4533068 | rs45458192 |
| rs4444235 | rs4459340 | rs447324  | rs4484967 | rs4499304 | rs4516605 | rs4533105 | rs4545921  |
| rs4444866 | rs4459609 | rs4473241 | rs448513  | rs4499342 | rs4516777 | rs453325  | rs4545941  |
| rs4444878 | rs4459895 | rs4473348 | rs4485401 | rs4499344 | rs4517166 | rs4533267 | rs45461499 |
| rs4445406 | rs4459994 | rs4473564 | rs4485425 | rs4499638 | rs4517452 | rs4533474 | rs454615   |
| rs4445544 | rs446001  | rs4473575 | rs4485470 | rs4499830 | rs4517468 | rs4533855 | rs45461791 |
| rs444558  | rs4460127 | rs447361  | rs4485754 | rs4500049 | rs4517475 | rs4534048 | rs45464494 |
| rs444561  | rs4460629 | rs4473651 | rs4486555 | rs4500512 | rs4517716 | rs4534535 | rs45465702 |
| rs4445669 | rs446064  | rs4473902 | rs4486622 | rs450067  | rs4517782 | rs4534613 | rs4546885  |
| rs4446237 | rs4460776 | rs4473914 | rs448671  | rs4500751 | rs4518111 | rs4534926 | rs4546904  |
| rs44466   | rs4460944 | rs4474021 | rs4487258 | rs4500770 | rs4518351 | rs4535048 | rs4547172  |
| rs4446794 | rs4461368 | rs4474229 | rs4487353 | rs4500930 | rs4518515 | rs4535251 | rs4547290  |
| rs4446955 | rs4461738 | rs4474514 | rs4487645 | rs4500960 | rs4518562 | rs4535457 | rs45473509 |
| rs4447398 | rs4462678 | rs4474742 | rs4487717 | rs4500972 | rs4519046 | rs4535497 | rs454741   |
| rs4447843 | rs4462906 | rs4474982 | rs4487720 | rs4501255 | rs4519409 | rs4535583 | rs45474499 |
| rs4448201 | rs4463061 | rs4475146 | rs4488133 | rs450189  | rs4519566 | rs4535700 | rs45474992 |
| rs4448343 | rs4463213 | rs4475250 | rs4488809 | rs4501923 | rs4519779 | rs4535826 | rs45474996 |
| rs4448892 | rs4463416 | rs4475251 | rs4489092 | rs4502008 | rs4520    | rs4536164 | rs4547554  |
| rs4449583 | rs4463516 | rs4475963 | rs448918  | rs4502027 | rs452036  | rs453638  | rs454774   |
| rs4449617 | rs4464040 | rs4476253 | rs4489283 | rs4502156 | rs4520444 | rs453658  | rs4547811  |
| rs4449673 | rs446522  | rs4476718 | rs4489968 | rs4502168 | rs4520607 | rs4536758 | rs45479691 |
| rs4449834 | rs4465231 | rs4476935 | rs4490044 | rs4502401 | rs4520846 | rs453699  | rs4548017  |
| rs445     | rs4465809 | rs4477285 | rs4490092 | rs450244  | rs4521268 | rs4537191 | rs4548095  |
| rs4450131 | rs4465830 | rs447735  | rs4490539 | rs4502545 | rs4521516 | rs4537305 | rs454822   |
| rs4450168 | rs4465929 | rs4477405 | rs4490572 | rs450277  | rs4522069 | rs4537545 | rs4548504  |
| rs4450871 | rs4465966 | rs447749  | rs4490780 | rs4502882 | rs4523230 | rs453755  | rs454854   |
| rs445114  | rs4466200 | rs4477562 | rs4490807 | rs4502920 | rs4523689 | rs4537554 | rs4548546  |
| rs4452060 | rs4466298 | rs4477910 | rs4491070 | rs4503095 | rs4523894 | rs4537697 | rs45486197 |
| rs4452296 | rs4466418 | rs447801  | rs4491180 | rs4503368 | rs4523957 | rs4538155 | rs45487303 |
| rs4452313 | rs4466452 | rs447802  | rs4491239 | rs450373  | rs4524    | rs4538475 | rs45488900 |
| rs4452856 | rs4466675 | rs4478037 | rs4491596 | rs4503880 | rs4524155 | rs4538653 | rs4548913  |
| rs4453027 | rs4466874 | rs4478137 | rs4491709 | rs4504165 | rs4524616 | rs453881  | rs4548995  |
| rs4453579 | rs4467035 | rs4478172 | rs4491723 | rs4504641 | rs4524734 | rs453922  | rs45490496 |
| rs4453725 | rs4467054 | rs4478445 | rs4491726 | rs4505077 | rs4525    | rs4539242 | rs4549095  |
| rs4453791 | rs4467099 | rs447875  | rs4491847 | rs4505759 | rs4525087 | rs4539421 | rs4549300  |
| rs4453827 | rs4467547 | rs4478858 | rs4491851 | rs4505848 | rs4525246 | rs4539969 | rs45495792 |
| rs4453916 | rs4467648 | rs4479056 | rs4491970 | rs4506170 | rs4525526 | rs454095  | rs4549631  |
| rs4454042 | rs4467770 | rs447911  | rs4493049 | rs4506495 | rs4526212 | rs4541111 | rs454968   |
| rs4454139 | rs4468    | rs4479249 | rs4493170 | rs4506565 | rs452629  | rs4541244 | rs4549685  |
| rs4454254 | rs4468251 | rs4479577 | rs449319  | rs450666  | rs4526367 | rs4541821 | rs45497800 |
| rs4454354 | rs4468571 | rs4479686 | rs4493233 | rs4507103 | rs4526442 | rs454185  | rs45498698 |
| rs4454603 | rs4468572 | rs4479849 | rs4493469 | rs4507125 | rs4526443 | rs4541868 | rs45501495 |
| rs4454799 | rs4468717 | rs4479913 | rs4493682 | rs4507181 | rs4526571 | rs454187  | rs45502300 |
| rs4454843 | rs446952  | rs4479915 | rs449394  | rs4507432 | rs4527088 | rs454214  | rs4550384  |
| rs4455005 | rs4469771 | rs4479984 | rs4494114 | rs4507656 | rs4527444 | rs4542427 | rs4550447  |

|            |            |            |           |           |           |           |           |
|------------|------------|------------|-----------|-----------|-----------|-----------|-----------|
| rs45505795 | rs455674   | rs45625438 | rs458017  | rs4594908 | rs4613836 | rs4631439 | rs464605  |
| rs45506201 | rs45567533 | rs45626541 | rs4580194 | rs4594972 | rs4613862 | rs4631704 | rs4646068 |
| rs4550673  | rs45568539 | rs45631563 | rs4580814 | rs4595397 | rs4614003 | rs4631830 | rs464609  |
| rs455073   | rs45569335 | rs45631632 | rs4580854 | rs4595495 | rs4614769 | rs4632195 | rs4646211 |
| rs4550782  | rs45569432 | rs4563182  | rs4580892 | rs459552  | rs4615152 | rs4632203 | rs4646284 |
| rs45508195 | rs4556997  | rs4563785  | rs4580893 | rs459571  | rs4615814 | rs4632228 | rs4646342 |
| rs45509595 | rs4557030  | rs4564007  | rs4580942 | rs459588  | rs4615960 | rs4632248 | rs4646404 |
| rs45509899 | rs4557224  | rs4564803  | rs4580973 | rs4596023 | rs4616071 | rs4632296 | rs4646450 |
| rs45510091 | rs45573936 | rs4565255  | rs4581298 | rs4596195 | rs4616299 | rs4632345 | rs4646650 |
| rs45510500 | rs45575338 | rs4565815  | rs4581486 | rs4596374 | rs4616635 | rs4632532 | rs4646658 |
| rs45512696 | rs4557564  | rs4565819  | rs4581549 | rs4596713 | rs4616688 | rs4632588 | rs4646572 |
| rs4551304  | rs45576433 | rs4565870  | rs4581570 | rs4596736 | rs4616695 | rs4632729 | rs4646705 |
| rs4551307  | rs4557697  | rs4566     | rs4581712 | rs4597218 | rs4616820 | rs4633074 | rs4646776 |
| rs45514798 | rs45577137 | rs4566648  | rs4581878 | rs4597342 | rs4617118 | rs463312  | rs4646947 |
| rs45515895 | rs4557765  | rs4566993  | rs4581940 | rs4597364 | rs4617507 | rs4633669 | rs4646949 |
| rs4551688  | rs4557790  | rs4567409  | rs4582524 | rs4598207 | rs4617614 | rs4633921 | rs4646961 |
| rs4551692  | rs455804   | rs4567411  | rs4582532 | rs4598218 | rs4617975 | rs4634143 | rs4647195 |
| rs4551754  | rs45580931 | rs4567493  | rs4582848 | rs4599029 | rs4618126 | rs4634342 | rs4647728 |
| rs4551851  | rs4558156  | rs4567910  | rs4583201 | rs4599108 | rs4618204 | rs4634827 | rs4647903 |
| rs455213   | rs45587331 | rs4567937  | rs458356  | rs4599658 | rs4618210 | rs4634868 | rs4647959 |
| rs45521740 | rs4558856  | rs4568584  | rs4583848 | rs4599845 | rs4618258 | rs4634932 | rs4648045 |
| rs45522544 | rs4558890  | rs4569100  | rs4584185 | rs4600592 | rs4619105 | rs4635359 | rs4648050 |
| rs4552369  | rs45589338 | rs457      | rs4584622 | rs4600898 | rs4619206 | rs4635383 | rs4648052 |
| rs4552569  | rs4558964  | rs4570961  | rs4585101 | rs460105  | rs4619406 | rs4635400 | rs4648356 |
| rs45527431 | rs4559164  | rs4571283  | rs4585149 | rs4601460 | rs4619651 | rs4635447 | rs4648450 |
| rs45528437 | rs45593736 | rs457134   | rs4585155 | rs4601530 | rs4619804 | rs4635969 | rs4648455 |
| rs4552855  | rs45594632 | rs4571506  | rs458522  | rs4601790 | rs4619875 | rs4636294 | rs4648633 |
| rs45528934 | rs45595831 | rs457161   | rs4585380 | rs460182  | rs4619890 | rs4636447 | rs4648664 |
| rs4553000  | rs45595933 | rs457162   | rs4585442 | rs4601984 | rs4620037 | rs4636654 | rs4648729 |
| rs45530735 | rs45597035 | rs4571715  | rs4585546 | rs4602043 | rs4620141 | rs4637087 | rs4648739 |
| rs45531831 | rs4559942  | rs4571923  | rs4586434 | rs4602255 | rs4620151 | rs4637207 | rs4648819 |
| rs45534736 | rs45599938 | rs4572029  | rs4586493 | rs4602861 | rs4620512 | rs4637303 | rs4648845 |
| rs45535039 | rs45599947 | rs4572134  | rs4586544 | rs4603816 | rs4620534 | rs4637409 | rs4648883 |
| rs4553560  | rs45600936 | rs4572213  | rs4586943 | rs4603973 | rs4620568 | rs4637559 | rs4648888 |
| rs45537841 | rs45600937 | rs4572866  | rs458699  | rs4604142 | rs4621152 | rs4637667 | rs4648892 |
| rs4553849  | rs4560096  | rs4573161  | rs4587178 | rs4604177 | rs4621553 | rs4638289 | rs464901  |
| rs4554007  | rs45601232 | rs4573350  | rs4587207 | rs4605213 | rs4622308 | rs4638568 | rs4649041 |
| rs45541434 | rs45602433 | rs4573745  | rs458741  | rs4605363 | rs4622329 | rs4638719 | rs4649269 |
| rs4554203  | rs4560319  | rs4573764  | rs4587594 | rs4605551 | rs4623326 | rs4639377 | rs465002  |
| rs4554318  | rs45603435 | rs4573996  | rs4587762 | rs4605951 | rs4623781 | rs4639414 | rs4650204 |
| rs45543339 | rs4560439  | rs4574015  | rs4588    | rs4606077 | rs4624119 | rs4639796 | rs4650206 |
| rs45543538 | rs45605540 | rs4574025  | rs4588023 | rs4606347 | rs4624549 | rs4639950 | rs4650277 |
| rs45543740 | rs45607834 | rs4574603  | rs4588384 | rs4606447 | rs4624724 | rs4639966 | rs4650608 |
| rs45544231 | rs45608532 | rs4575098  | rs4588900 | rs4606681 | rs4624820 | rs4640244 | rs4650613 |
| rs4554617  | rs45608936 | rs4575195  | rs4589135 | rs4606752 | rs4625    | rs4640251 | rs4650649 |
| rs4554696  | rs45609335 | rs4575361  | rs4589253 | rs4606774 | rs4625719 | rs464063  | rs4650943 |
| rs4554699  | rs45610037 | rs4575545  | rs4589258 | rs460692  | rs4625756 | rs4641276 | rs4650963 |
| rs4554754  | rs4561025  | rs4575884  | rs4589542 | rs4606978 | rs4625783 | rs4641306 | rs4650994 |
| rs4554778  | rs45610331 | rs4576021  | rs4589746 | rs4607103 | rs4625852 | rs4642101 | rs4651005 |
| rs4554811  | rs45611741 | rs4576334  | rs4589766 | rs4607155 | rs4626664 | rs4642516 | rs4651135 |
| rs4554825  | rs4561177  | rs4576476  | rs459044  | rs4607517 | rs4626924 | rs4642619 | rs4651205 |
| rs455489   | rs45613035 | rs457648   | rs4590691 | rs4608502 | rs4627212 | rs4642942 | rs4651224 |
| rs4554975  | rs4561483  | rs4576754  | rs4590732 | rs460879  | rs4627335 | rs4642960 | rs4651238 |
| rs4555082  | rs4561508  | rs4576809  | rs459078  | rs460888  | rs4627442 | rs4643170 | rs4652135 |
| rs45551835 | rs45617141 | rs4576826  | rs4590800 | rs4609139 | rs4627617 | rs4643373 | rs4652192 |
| rs4555268  | rs4561770  | rs4577206  | rs4590817 | rs460976  | rs462779  | rs4643406 | rs46522   |
| rs455527   | rs4561781  | rs4577244  | rs4590982 | rs4609871 | rs4628086 | rs4643489 | rs4652270 |
| rs45553335 | rs4561819  | rs4577309  | rs4591326 | rs4611251 | rs4629059 | rs4644158 | rs4652291 |
| rs4556142  | rs45619139 | rs4578351  | rs4591347 | rs4611262 | rs4629237 | rs4644350 | rs4652492 |
| rs45563932 | rs45619934 | rs4578769  | rs459193  | rs4611552 | rs4630220 | rs4644624 | rs4652514 |
| rs45563938 | rs456205   | rs4578918  | rs4592416 | rs4611747 | rs4630221 | rs464499  | rs4652560 |
| rs4556405  | rs4562056  | rs4579012  | rs4592425 | rs4612664 | rs463036  | rs4645    | rs4652676 |
| rs455650   | rs45620941 | rs4579095  | rs4592853 | rs4612793 | rs4630562 | rs4645630 | rs465276  |
| rs45565037 | rs4562194  | rs4579388  | rs4593108 | rs4613079 | rs4630591 | rs4645881 | rs4652802 |
| rs45565536 | rs4562281  | rs4579928  | rs4593472 | rs4613239 | rs4630700 | rs4645915 | rs4652875 |
| rs455660   | rs4562328  | rs4580037  | rs4594837 | rs4613561 | rs4630723 | rs4645936 | rs4653015 |
| rs45566333 | rs4562360  | rs4580163  | rs4594881 | rs4613763 | rs4630744 | rs4645995 | rs4653092 |

|           |           |           |           |           |           |           |           |
|-----------|-----------|-----------|-----------|-----------|-----------|-----------|-----------|
| rs4653102 | rs4659520 | rs4665719 | rs4671601 | rs4676901 | rs4684158 | rs4690522 | rs4699720 |
| rs4653218 | rs4659554 | rs4665736 | rs4671686 | rs4676964 | rs4684185 | rs4690538 | rs4699791 |
| rs4653301 | rs465969  | rs4665773 | rs4671789 | rs4677137 | rs4684242 | rs4690727 | rs4699913 |
| rs4653635 | rs4659805 | rs4665830 | rs4671799 | rs4677148 | rs4684433 | rs4690757 | rs4699954 |
| rs4653663 | rs465983  | rs4665896 | rs4671934 | rs4677156 | rs4684833 | rs4690766 | rs4699965 |
| rs4653767 | rs4660128 | rs4665943 | rs4672    | rs467728  | rs4684847 | rs4690774 | rs4700060 |
| rs4653889 | rs4660253 | rs4665972 | rs4672075 | rs4677294 | rs4684848 | rs4690909 | rs4700160 |
| rs465401  | rs4660257 | rs4665978 | rs4672229 | rs4677597 | rs4685090 | rs4690974 | rs4700229 |
| rs4654395 | rs4660293 | rs4665985 | rs4672317 | rs4677611 | rs4685141 | rs4691139 | rs4700347 |
| rs4654748 | rs4660303 | rs4665987 | rs4672338 | rs4677813 | rs4685260 | rs4691379 | rs4700393 |
| rs4654873 | rs4660306 | rs4665988 | rs4672375 | rs4678090 | rs4685282 | rs4691380 | rs4700436 |
| rs4654874 | rs4660387 | rs4666000 | rs4672440 | rs4678145 | rs4685405 | rs4691601 | rs4700486 |
| rs4654897 | rs4660482 | rs4666002 | rs4672458 | rs4678176 | rs4685408 | rs4691666 | rs4700589 |
| rs4654899 | rs4660586 | rs4666012 | rs4672497 | rs4678272 | rs4685448 | rs4691707 | rs4700608 |
| rs4654903 | rs4660749 | rs4666014 | rs4672505 | rs4678406 | rs4685771 | rs4691895 | rs4701031 |
| rs4654906 | rs4660761 | rs4666070 | rs4672507 | rs4678408 | rs4686340 | rs4692190 | rs4701113 |
| rs4654925 | rs4660808 | rs4666343 | rs4672528 | rs4678418 | rs4686392 | rs4692267 | rs4701119 |
| rs4654932 | rs4660861 | rs4666639 | rs4672623 | rs4678506 | rs4686419 | rs4692386 | rs4702    |
| rs4654971 | rs4661096 | rs4666465 | rs4672819 | rs4678552 | rs4686471 | rs4693089 | rs4702099 |
| rs4654975 | rs4662226 | rs4666634 | rs4672862 | rs4678915 | rs4686534 | rs4693167 | rs4702131 |
| rs4655001 | rs4662236 | rs4666682 | rs4673238 | rs4678938 | rs4686671 | rs4693234 | rs4702334 |
| rs4655059 | rs4662344 | rs4666821 | rs4673265 | rs4679081 | rs4686683 | rs4693244 | rs4702961 |
| rs4655215 | rs4662382 | rs4666851 | rs4673528 | rs4679103 | rs4686696 | rs4693327 | rs4703019 |
| rs4655268 | rs4662402 | rs4666990 | rs4673546 | rs4679729 | rs4686739 | rs4693545 | rs4703133 |
| rs465530  | rs4662414 | rs4666992 | rs467369  | rs4679760 | rs4686904 | rs4693741 | rs4703589 |
| rs4655537 | rs4662551 | rs4667029 | rs4673709 | rs4679826 | rs4686908 | rs4693773 | rs4703642 |
| rs4655582 | rs4662711 | rs4667117 | rs4673712 | rs4679955 | rs4686914 | rs469394  | rs4703667 |
| rs4655598 | rs4663105 | rs4667282 | rs467379  | rs4679956 | rs4686952 | rs4693974 | rs4703730 |
| rs4655617 | rs4663199 | rs4667347 | rs4673840 | rs4680    | rs4686991 | rs4693978 | rs4703855 |
| rs4655701 | rs4663213 | rs4667572 | rs4673866 | rs4680046 | rs4687074 | rs4693980 | rs4703881 |
| rs4655719 | rs4663379 | rs4667594 | rs4673905 | rs4680250 | rs4687352 | rs4694429 | rs4703890 |
| rs4655783 | rs4663540 | rs4667600 | rs4673912 | rs4680338 | rs4687477 | rs4694504 | rs4703894 |
| rs4655791 | rs4663580 | rs4668267 | rs4674    | rs4680340 | rs4687552 | rs4694952 | rs4703904 |
| rs4655794 | rs4663617 | rs4668338 | rs4674124 | rs4680392 | rs4687586 | rs4695886 | rs4704171 |
| rs4656180 | rs4663669 | rs4668354 | rs4674280 | rs4680564 | rs4687617 | rs4696108 | rs4704221 |
| rs4656185 | rs4663969 | rs466837  | rs4674406 | rs4680588 | rs4687625 | rs4696256 | rs4704262 |
| rs4656220 | rs4663983 | rs4668585 | rs4674407 | rs4681011 | rs4687662 | rs4696257 | rs4704336 |
| rs4656224 | rs4664048 | rs4668732 | rs4674669 | rs4681200 | rs4687717 | rs4696278 | rs4704389 |
| rs4656236 | rs4664080 | rs4669306 | rs4674676 | rs4681329 | rs4687718 | rs4696314 | rs4704397 |
| rs4656345 | rs4664293 | rs4669413 | rs4674740 | rs4681533 | rs4687735 | rs4696594 | rs4704519 |
| rs465646  | rs4664299 | rs4669522 | rs4674916 | rs4681794 | rs4688013 | rs4697062 | rs4704727 |
| rs4656461 | rs4664304 | rs4669634 | rs4674993 | rs4681821 | rs4688116 | rs469721  | rs4704737 |
| rs4656599 | rs4664308 | rs4669869 | rs467510  | rs4681851 | rs4688359 | rs4697241 | rs4704780 |
| rs465670  | rs4664330 | rs4669875 | rs4675190 | rs4682103 | rs4688370 | rs4697248 | rs4704825 |
| rs4656716 | rs4664346 | rs4669879 | rs4675248 | rs4682671 | rs4688504 | rs469735  | rs4704826 |
| rs4656744 | rs4664442 | rs4670221 | rs4675317 | rs4682816 | rs4688756 | rs4697446 | rs4704834 |
| rs4656748 | rs4664446 | rs4670256 | rs4675360 | rs4682823 | rs4688759 | rs469758  | rs4704835 |
| rs4656784 | rs4664475 | rs4670546 | rs4675365 | rs4682863 | rs4688760 | rs4697584 | rs4704846 |
| rs4656958 | rs4664602 | rs4670629 | rs4675369 | rs4682867 | rs4689    | rs4697714 | rs4704963 |
| rs4657041 | rs4664604 | rs4670759 | rs4675374 | rs4682868 | rs4689388 | rs469772  | rs4705007 |
| rs4657097 | rs4664605 | rs4670779 | rs4675429 | rs4682973 | rs4689592 | rs4697724 | rs4705014 |
| rs4657098 | rs4664698 | rs4670813 | rs4675617 | rs4683148 | rs4689653 | rs4697248 | rs4705059 |
| rs4657172 | rs466477  | rs4670893 | rs4675682 | rs4683184 | rs4690028 | rs469735  | rs4705205 |
| rs4657175 | rs4664962 | rs467093  | rs4675690 | rs4683205 | rs4690029 | rs4697446 | rs4705336 |
| rs4657178 | rs4664976 | rs467095  | rs4675694 | rs4683234 | rs4690085 | rs469758  | rs4705415 |
| rs4657476 | rs4664983 | rs4671050 | rs4675812 | rs468327  | rs4690095 | rs4697584 | rs4705763 |
| rs4657609 | rs4665058 | rs4671137 | rs4675855 | rs4683294 | rs4690098 | rs4697714 | rs4705767 |
| rs4657616 | rs4665083 | rs4671193 | rs4675874 | rs4683346 | rs4690116 | rs4697724 | rs4705938 |
| rs4657825 | rs4665141 | rs4671217 | rs4675894 | rs4683438 | rs4690203 | rs4697248 | rs4705952 |
| rs4657983 | rs4665156 | rs4671222 | rs4676049 | rs4683603 | rs4690219 | rs469735  | rs4705959 |
| rs4658019 | rs4665238 | rs4671319 | rs4676225 | rs4683605 | rs4690222 | rs4697446 | rs4705962 |
| rs4658046 | rs4665244 | rs4671328 | rs4676276 | rs4683632 | rs4690229 | rs469758  | rs4705963 |
| rs4658101 | rs4665390 | rs4671330 | rs4676406 | rs4683701 | rs4690294 | rs4697584 | rs4705986 |
| rs4658234 | rs4665412 | rs4671357 | rs4676408 | rs4683702 | rs4690295 | rs4697714 | rs4706006 |
| rs4658403 | rs4665624 | rs4671379 | rs4676410 | rs4683724 | rs4690326 | rs4697724 | rs4706020 |
| rs4659386 | rs4665630 | rs4671393 | rs4676609 | rs4683900 | rs4690421 | rs4697724 | rs4706108 |
| rs4659415 | rs4665710 | rs4671459 | rs4676893 | rs4683992 | rs4690423 | rs4697724 | rs4706386 |

|           |           |           |           |           |           |           |           |
|-----------|-----------|-----------|-----------|-----------|-----------|-----------|-----------|
| rs4706391 | rs4713693 | rs4720550 | rs4727364 | rs4733724 | rs474030  | rs4747197 | rs4754839 |
| rs4706392 | rs4713841 | rs4720652 | rs4727380 | rs4733725 | rs4740383 | rs4747198 | rs4755202 |
| rs4706831 | rs4713858 | rs472070  | rs4727443 | rs4733727 | rs4740619 | rs4747199 | rs4755334 |
| rs4706938 | rs4713899 | rs4721057 | rs4727449 | rs4733778 | rs4740631 | rs4747616 | rs4755713 |
| rs4707554 | rs4713911 | rs4721089 | rs4727469 | rs4733781 | rs4741343 | rs4747823 | rs4755720 |
| rs4707609 | rs4713940 | rs472109  | rs4727618 | rs4733789 | rs4741351 | rs4747846 | rs4755726 |
| rs4707680 | rs4713978 | rs4721096 | rs4727695 | rs4733817 | rs4741377 | rs4748146 | rs4755737 |
| rs470797  | rs4714001 | rs4721135 | rs4727804 | rs4733823 | rs4741571 | rs4748153 | rs4755851 |
| rs4708620 | rs4714342 | rs4721217 | rs4728071 | rs4733894 | rs4741594 | rs4748463 | rs4756044 |
| rs4708832 | rs4714481 | rs4721295 | rs4728092 | rs4734    | rs4741674 | rs4748466 | rs4756059 |
| rs4709212 | rs4714508 | rs4721442 | rs4728142 | rs47340   | rs4741775 | rs4748734 | rs4756121 |
| rs4709655 | rs4714548 | rs4721457 | rs4728298 | rs47341   | rs4741893 | rs4748779 | rs475616  |
| rs4709741 | rs4714554 | rs4721668 | rs4728302 | rs4734193 | rs4742045 | rs4748813 | rs4756168 |
| rs4709745 | rs4714598 | rs4721802 | rs4728335 | rs4734427 | rs474210  | rs4748969 | rs4756190 |
| rs4709746 | rs4714599 | rs4721823 | rs4728350 | rs4734500 | rs4742151 | rs4748994 | rs4756265 |
| rs4709818 | rs4714633 | rs4721902 | rs4728358 | rs4734619 | rs4742293 | rs4749043 | rs4756856 |
| rs4709819 | rs4714668 | rs4722167 | rs4728638 | rs473464  | rs474240  | rs4749125 | rs4756992 |
| rs4709820 | rs4714677 | rs4722171 | rs472873  | rs4734654 | rs474247  | rs4749126 | rs4757118 |
| rs4710154 | rs4714678 | rs4722172 | rs4729068 | rs4734804 | rs4742700 | rs4749615 | rs4757136 |
| rs4710703 | rs471470  | rs4722398 | rs4729098 | rs4734879 | rs4742903 | rs4749723 | rs4757137 |
| rs4710758 | rs4714726 | rs4722404 | rs4729260 | rs4734972 | rs4743007 | rs4749779 | rs4757142 |
| rs4710971 | rs4714729 | rs4722407 | rs4729303 | rs4735297 | rs4743009 | rs4749894 | rs4757145 |
| rs4711107 | rs4714811 | rs4722530 | rs4729379 | rs4735333 | rs4743033 | rs4750019 | rs4757242 |
| rs4711112 | rs4714896 | rs4722551 | rs4729597 | rs4735451 | rs4743034 | rs475002  | rs4757391 |
| rs4711152 | rs4714955 | rs4722593 | rs4729607 | rs4735677 | rs4743038 | rs4750535 | rs4757417 |
| rs4711171 | rs4714958 | rs4722632 | rs4729854 | rs4735692 | rs4743150 | rs4750833 | rs4757420 |
| rs4711336 | rs4715018 | rs4722665 | rs4730020 | rs4735761 | rs4743151 | rs4751    | rs4757589 |
| rs4711350 | rs4715207 | rs4722669 | rs4730073 | rs4735764 | rs4743311 | rs4751108 | rs4757618 |
| rs4711389 | rs4715208 | rs4722672 | rs4730221 | rs4735769 | rs4743469 | rs4751240 | rs4757774 |
| rs4711416 | rs4715210 | rs4722675 | rs4730387 | rs4736359 | rs4743758 | rs475125  | rs4757788 |
| rs471144  | rs4715221 | rs4722758 | rs473068  | rs4736612 | rs4743771 | rs4751614 | rs4757955 |
| rs4711589 | rs4715316 | rs4722762 | rs4730775 | rs4736916 | rs4743776 | rs4751628 | rs4757956 |
| rs4711689 | rs4715321 | rs4722772 | rs4730954 | rs4736999 | rs4743820 | rs4751648 | rs4757957 |
| rs4711748 | rs4715326 | rs4722843 | rs4731009 | rs4737009 | rs474384  | rs4751697 | rs475796  |
| rs4711750 | rs4715332 | rs4723038 | rs4731052 | rs4737010 | rs4743930 | rs4751996 | rs4758633 |
| rs4711751 | rs4715340 | rs4723263 | rs4731117 | rs4737183 | rs4744    | rs4752018 | rs4758639 |
| rs4711790 | rs4715491 | rs4723276 | rs4731120 | rs4737188 | rs4744239 | rs4752028 | rs4758649 |
| rs4711890 | rs4715517 | rs4723406 | rs4731122 | rs4737395 | rs4744246 | rs4752078 | rs4758675 |
| rs4711961 | rs4716325 | rs4724083 | rs4731207 | rs4737446 | rs4744250 | rs4752116 | rs4758919 |
| rs4712120 | rs4717520 | rs4724125 | rs4731328 | rs4737525 | rs4744295 | rs4752569 | rs4758963 |
| rs4712371 | rs471756  | rs4724452 | rs4731365 | rs4737933 | rs4744369 | rs4752580 | rs4759073 |
| rs4712523 | rs4717827 | rs4724511 | rs4731366 | rs4738094 | rs474442  | rs4752582 | rs4759074 |
| rs4712524 | rs4717905 | rs4724702 | rs4731368 | rs4738141 | rs4744546 | rs4752593 | rs4759076 |
| rs4712528 | rs471811  | rs4724828 | rs4731392 | rs4738285 | rs4744712 | rs4752678 | rs4759228 |
| rs4712614 | rs4718428 | rs472486  | rs4731413 | rs473837  | rs4744899 | rs4752693 | rs4759229 |
| rs4712653 | rs4718886 | rs4724860 | rs4731415 | rs4738679 | rs4744962 | rs4752700 | rs4759247 |
| rs4712656 | rs4718964 | rs472495  | rs4731532 | rs4738684 | rs4745    | rs4752801 | rs4759277 |
| rs4712936 | rs4718976 | rs4725065 | rs4731601 | rs4738817 | rs4745021 | rs4752805 | rs4759316 |
| rs4712953 | rs4719223 | rs4725366 | rs4731674 | rs4738828 | rs474513  | rs4752824 | rs4759319 |
| rs4712970 | rs4719366 | rs4725602 | rs4731699 | rs473902  | rs4745216 | rs4752829 | rs4759320 |
| rs4712976 | rs4719460 | rs4725617 | rs4731701 | rs4739046 | rs4745706 | rs4752845 | rs4759348 |
| rs4713071 | rs4719463 | rs4725792 | rs4731702 | rs4739066 | rs4745723 | rs4752856 | rs4759364 |
| rs4713103 | rs4719486 | rs4725922 | rs4731794 | rs473913  | rs4745729 | rs4752907 | rs4759375 |
| rs4713118 | rs4719497 | rs4725944 | rs4731919 | rs4739134 | rs4745748 | rs4753126 | rs4759434 |
| rs4713145 | rs4719648 | rs4725969 | rs4731925 | rs4739140 | rs4745812 | rs4753209 | rs4759545 |
| rs471315  | rs4719654 | rs4725982 | rs4731992 | rs4739182 | rs4745925 | rs4753251 | rs4759640 |
| rs4713169 | rs4719730 | rs4726070 | rs4732129 | rs4739235 | rs4745982 | rs4753347 | rs4759787 |
| rs4713226 | rs4719841 | rs4726459 | rs4732134 | rs4739249 | rs4746139 | rs4753693 | rs4760    |
| rs4713266 | rs4719884 | rs4726481 | rs473219  | rs4739403 | rs4746140 | rs475377  | rs4760044 |
| rs4713354 | rs4719885 | rs4726575 | rs473224  | rs4739515 | rs4746270 | rs4753772 | rs4760099 |
| rs4713462 | rs471994  | rs4726580 | rs4732339 | rs4739558 | rs4746339 | rs475390  | rs476012  |
| rs4713555 | rs4719944 | rs472660  | rs4732536 | rs4739570 | rs4746372 | rs4754196 | rs4760254 |
| rs4713572 | rs4720058 | rs4726600 | rs4733063 | rs4739697 | rs4746582 | rs4754299 | rs4760355 |
| rs471364  | rs4720118 | rs4727027 | rs4733156 | rs4739736 | rs474671  | rs4754301 | rs4760364 |
| rs4713669 | rs4720244 | rs4727099 | rs4733601 | rs4739738 | rs4746822 | rs4754318 | rs4760384 |
| rs4713675 | rs4720476 | rs4727189 | rs4733613 | rs4739938 | rs4747011 | rs4754687 | rs4760609 |
| rs4713688 | rs4720485 | rs4727338 | rs4733720 | rs4740273 | rs4747090 | rs4754698 | rs4760619 |



|           |           |           |           |           |           |           |           |
|-----------|-----------|-----------|-----------|-----------|-----------|-----------|-----------|
| rs4760674 | rs4766878 | rs4775319 | rs4782351 | rs4785955 | rs4791291 | rs4795397 | rs4802307 |
| rs4760682 | rs4766897 | rs4775348 | rs4782369 | rs4785958 | rs4791331 | rs4795399 | rs4802399 |
| rs4760786 | rs4766898 | rs4775373 | rs4782371 | rs478607  | rs4791641 | rs4795400 | rs4802570 |
| rs4761234 | rs4766960 | rs4775427 | rs4782380 | rs4786084 | rs4791765 | rs4795402 | rs480263  |
| rs4761402 | rs4767027 | rs4775429 | rs4782429 | rs4786286 | rs4791774 | rs4795413 | rs4802779 |
| rs4761517 | rs4767120 | rs4775761 | rs4782568 | rs4786466 | rs4791967 | rs4795416 | rs4802871 |
| rs4761523 | rs4767279 | rs4775769 | rs4782722 | rs4786485 | rs4792250 | rs4795419 | rs4802890 |
| rs4761524 | rs4767293 | rs4775792 | rs4782862 | rs4786488 | rs4792260 | rs4795433 | rs480299  |
| rs4761545 | rs4767327 | rs4775808 | rs4782936 | rs4786525 | rs4792535 | rs4795519 | rs4803221 |
| rs4761587 | rs4767332 | rs4776316 | rs478304  | rs478682  | rs4792558 | rs4795641 | rs4803297 |
| rs4761637 | rs4767364 | rs4776341 | rs4783055 | rs4787028 | rs4792716 | rs4795893 | rs480330  |
| rs4761702 | rs4767366 | rs4776361 | rs4783181 | rs4787294 | rs4792728 | rs4795912 | rs4803331 |
| rs4761976 | rs4767454 | rs4776455 | rs4783183 | rs4787457 | rs4792735 | rs4796089 | rs4803336 |
| rs4761989 | rs4767469 | rs4776477 | rs4783185 | rs4787486 | rs4792800 | rs4796217 | rs4803358 |
| rs4762048 | rs4767550 | rs4776613 | rs4783186 | rs4787491 | rs4792814 | rs4796224 | rs4803373 |
| rs4762080 | rs4767645 | rs4776614 | rs4783187 | rs4787951 | rs4792819 | rs4796334 | rs4803378 |
| rs4762116 | rs4767831 | rs4776793 | rs4783189 | rs4788046 | rs4792831 | rs4796403 | rs4803446 |
| rs4762254 | rs4767902 | rs4776806 | rs4783244 | rs4788084 | rs4792849 | rs4796622 | rs4803451 |
| rs4762284 | rs4767921 | rs4776813 | rs478328  | rs4788099 | rs4792867 | rs4796647 | rs4803455 |
| rs4762293 | rs4767923 | rs4776879 | rs4783443 | rs4788102 | rs4792897 | rs4796724 | rs4803457 |
| rs4762326 | rs4767938 | rs477692  | rs4783581 | rs4788115 | rs4792909 | rs4796791 | rs4803458 |
| rs4762479 | rs4768236 | rs4776970 | rs4783719 | rs4788196 | rs4792953 | rs4796995 | rs4803459 |
| rs4762559 | rs476828  | rs4777230 | rs4783720 | rs4788203 | rs4793022 | rs4797102 | rs4803468 |
| rs4762694 | rs476845  | rs4777232 | rs4783722 | rs4788204 | rs4793062 | rs479744  | rs4803748 |
| rs4762755 | rs4768451 | rs4777245 | rs4783789 | rs4788218 | rs4793090 | rs4797709 | rs4803750 |
| rs4762756 | rs4768642 | rs4777294 | rs4783815 | rs478839  | rs479333  | rs479777  | rs4803764 |
| rs4763    | rs4768672 | rs4777602 | rs4783961 | rs4788415 | rs479336  | rs4798095 | rs4803840 |
| rs4763297 | rs4768698 | rs477771  | rs4783993 | rs4788418 | rs4793393 | rs4798105 | rs4803936 |
| rs476348  | rs4768849 | rs4777825 | rs4783994 | rs4788439 | rs4793397 | rs479844  | rs4803982 |
| rs476382  | rs4768862 | rs4777857 | rs4784054 | rs4788446 | rs4793434 | rs4799176 | rs480400  |
| rs4763832 | rs4768903 | rs4778058 | rs4784165 | rs4788570 | rs4793501 | rs4799295 | rs4804025 |
| rs476386  | rs4768934 | rs4778075 | rs4784223 | rs4788584 | rs4793529 | rs4799450 | rs4804033 |
| rs4763879 | rs4769824 | rs4778087 | rs4784224 | rs4788593 | rs4793531 | rs4799454 | rs4804036 |
| rs4764038 | rs4770057 | rs4778138 | rs4784227 | rs478863  | rs4793788 | rs4799461 | rs4804155 |
| rs4764080 | rs4771122 | rs4778219 | rs4784256 | rs4788676 | rs4793836 | rs4799464 | rs4804181 |
| rs4764133 | rs4771268 | rs4778224 | rs4784323 | rs4788694 | rs4793885 | rs4799541 | rs4804217 |
| rs4764487 | rs4771320 | rs4778249 | rs478438  | rs4788815 | rs4794003 | rs479971  | rs4804311 |
| rs4764623 | rs4771332 | rs4778581 | rs478442  | rs4788867 | rs4794015 | rs4799723 | rs4804312 |
| rs4764683 | rs4771651 | rs477860  | rs4784463 | rs4788913 | rs4794018 | rs4799936 | rs4804411 |
| rs4764725 | rs4771674 | rs4778636 | rs4784464 | rs4789094 | rs4794027 | rs4799949 | rs4804413 |
| rs4764850 | rs4772087 | rs4778639 | rs4784655 | rs4789294 | rs4794033 | rs4799950 | rs4804416 |
| rs4764899 | rs4772092 | rs4778665 | rs4784709 | rs4789452 | rs479404  | rs4800123 | rs4804433 |
| rs4764939 | rs4772094 | rs4778879 | rs478474  | rs4789763 | rs4794048 | rs4800148 | rs4804474 |
| rs4764949 | rs4772189 | rs477895  | rs4784886 | rs4789847 | rs4794058 | rs4800151 | rs4804517 |
| rs4765127 | rs4772201 | rs4778988 | rs4784934 | rs4790076 | rs4794213 | rs4800173 | rs4804540 |
| rs4765219 | rs477224  | rs4779526 | rs4784939 | rs479018  | rs4794283 | rs4800201 | rs4804556 |
| rs4765315 | rs4772303 | rs4779584 | rs4784958 | rs4790231 | rs4794333 | rs4800356 | rs4804562 |
| rs4765352 | rs4772494 | rs477992  | rs4785187 | rs4790292 | rs4794447 | rs4800420 | rs4804573 |
| rs4765353 | rs4772729 | rs478002  | rs4785204 | rs4790323 | rs479445  | rs4800446 | rs4804669 |
| rs4765540 | rs4773140 | rs4780346 | rs4785296 | rs4790332 | rs4794720 | rs4800452 | rs4804732 |
| rs4765541 | rs4773141 | rs4780355 | rs4785384 | rs4790333 | rs4794813 | rs4800490 | rs4804774 |
| rs4765623 | rs4773144 | rs4780401 | rs4785469 | rs4790352 | rs4794814 | rs4800995 | rs4804815 |
| rs4765655 | rs4773173 | rs4780563 | rs4785480 | rs4790355 | rs4794817 | rs4800998 | rs4804833 |
| rs4765663 | rs4773180 | rs4780790 | rs4785495 | rs479051  | rs4794820 | rs4801000 | rs4804951 |
| rs476581  | rs4773860 | rs4780885 | rs4785505 | rs4790714 | rs4794822 | rs4801001 | rs4804980 |
| rs4765913 | rs4774175 | rs478093  | rs4785574 | rs4790870 | rs4794923 | rs4801109 | rs4805129 |
| rs4765914 | rs4774590 | rs4780934 | rs4785587 | rs4790874 | rs4794977 | rs4801131 | rs4805491 |
| rs4765929 | rs4774940 | rs4781072 | rs4785612 | rs4790881 | rs4795067 | rs4801147 | rs4805531 |
| rs4766188 | rs4775006 | rs4781349 | rs4785645 | rs4790887 | rs4795085 | rs4801157 | rs4805566 |
| rs476633  | rs4775033 | rs4781499 | rs4785699 | rs4790930 | rs4795195 | rs4801216 | rs4805681 |
| rs476636  | rs4775041 | rs4781534 | rs4785736 | rs4790941 | rs4795218 | rs4801589 | rs4805755 |
| rs4766424 | rs4775044 | rs4781978 | rs4785742 | rs4790981 | rs4795281 | rs4801605 | rs4805801 |
| rs4766428 | rs4775086 | rs478222  | rs4785752 | rs4790993 | rs4795364 | rs4801751 | rs4805834 |
| rs4766462 | rs477515  | rs4782271 | rs4785763 | rs4791    | rs4795384 | rs4801778 | rs4805881 |
| rs4766566 | rs4775191 | rs4782285 | rs4785767 | rs479105  | rs4795388 | rs4802111 | rs4805885 |
| rs4766578 | rs4775300 | rs4782302 | rs4785781 | rs4791212 | rs4795393 | rs4802112 | rs4805962 |
| rs4766655 | rs4775302 | rs4782318 | rs4785903 | rs4791249 | rs4795395 | rs4802113 | rs4806073 |

|           |           |           |           |           |           |           |           |
|-----------|-----------|-----------|-----------|-----------|-----------|-----------|-----------|
| rs4806103 | rs4809543 | rs4814176 | rs4820829 | rs4830580 | rs4837631 | rs4841569 | rs4845604 |
| rs4806173 | rs480958  | rs4814391 | rs4820830 | rs483082  | rs4837793 | rs4841600 | rs4845617 |
| rs4806469 | rs4809604 | rs4814512 | rs4820885 | rs4831174 | rs4837794 | rs4841662 | rs4845623 |
| rs4806666 | rs4809619 | rs4814656 | rs4820955 | rs4831182 | rs4837827 | rs4841747 | rs4845624 |
| rs4806812 | rs4809706 | rs4814776 | rs4820998 | rs483143  | rs4837886 | rs4841899 | rs4845625 |
| rs4806814 | rs4809728 | rs4814778 | rs4821083 | rs483180  | rs4837892 | rs4842    | rs4845661 |
| rs4806832 | rs4809731 | rs4814779 | rs4821102 | rs4832012 | rs4837905 | rs4842200 | rs4845703 |
| rs4806862 | rs4809866 | rs4814857 | rs4821112 | rs4832290 | rs4838018 | rs4842266 | rs4845774 |
| rs4807000 | rs480989  | rs4814864 | rs4821116 | rs4832298 | rs4838049 | rs4842313 | rs4845875 |
| rs4807003 | rs4809906 | rs4814873 | rs4821124 | rs4832312 | rs4838083 | rs4842316 | rs4845987 |
| rs4807054 | rs4810067 | rs4814884 | rs4821469 | rs4832605 | rs4838097 | rs4842324 | rs4846010 |
| rs4807065 | rs4810145 | rs481519  | rs4821544 | rs4832763 | rs4838147 | rs4842438 | rs4846022 |
| rs4807125 | rs4810316 | rs4815364 | rs4821712 | rs4833079 | rs4838605 | rs4842486 | rs4846044 |
| rs4807203 | rs4810362 | rs4815570 | rs4821764 | rs4833093 | rs4838999 | rs4842509 | rs4846082 |
| rs4807205 | rs4810426 | rs4815605 | rs4821797 | rs4833095 | rs483905  | rs4842610 | rs4846204 |
| rs4807415 | rs4810479 | rs4815606 | rs4821816 | rs4833103 | rs4839155 | rs4842666 | rs4846217 |
| rs4807428 | rs4810485 | rs4815663 | rs4821888 | rs4833111 | rs483916  | rs4842676 | rs4846230 |
| rs4807440 | rs4810580 | rs4815904 | rs4821897 | rs4833236 | rs4839185 | rs4842687 | rs4846476 |
| rs4807455 | rs4810619 | rs4815914 | rs4821935 | rs4833407 | rs4839270 | rs4842700 | rs4846478 |
| rs4807462 | rs481076  | rs4815915 | rs4821939 | rs4833558 | rs4839470 | rs4842786 | rs4846479 |
| rs4807465 | rs4810881 | rs481595  | rs4821940 | rs4833687 | rs483954  | rs4842838 | rs4846480 |
| rs4807467 | rs4810883 | rs4816017 | rs4821995 | rs4834214 | rs4839604 | rs4842918 | rs4846561 |
| rs4807472 | rs4810894 | rs4817505 | rs4822024 | rs4834221 | rs4839680 | rs4842921 | rs4846565 |
| rs4807475 | rs4810896 | rs4817554 | rs482204  | rs4834232 | rs4839712 | rs4842924 | rs4846567 |
| rs4807542 | rs4811020 | rs4817795 | rs4822053 | rs4834272 | rs4839715 | rs4842926 | rs4846580 |
| rs4807612 | rs4811050 | rs4817983 | rs4822102 | rs4834311 | rs4839827 | rs4843040 | rs4846724 |
| rs4807629 | rs4811073 | rs4817984 | rs4822103 | rs4834347 | rs4839955 | rs4843073 | rs4846904 |
| rs4807630 | rs4811076 | rs4817986 | rs4822107 | rs4834497 | rs4840086 | rs4843080 | rs4846910 |
| rs4807633 | rs4811444 | rs4817987 | rs4822108 | rs483450  | rs4840367 | rs4843136 | rs4846913 |
| rs4807942 | rs4811470 | rs4817988 | rs4822112 | rs483465  | rs4840376 | rs4843185 | rs4846914 |
| rs4808047 | rs4811476 | rs4818005 | rs4822191 | rs4834735 | rs4840425 | rs4843227 | rs4846922 |
| rs4808075 | rs4811528 | rs4818008 | rs4822384 | rs4834770 | rs4840514 | rs4843231 | rs4846923 |
| rs4808105 | rs4811601 | rs4818025 | rs4822523 | rs4835000 | rs4840519 | rs4843343 | rs4847127 |
| rs4808136 | rs4811602 | rs481806  | rs4822983 | rs4835097 | rs4840523 | rs4843337 | rs4847240 |
| rs4808154 | rs4811741 | rs4818226 | rs4823006 | rs4835177 | rs4840543 | rs4843418 | rs4847401 |
| rs4808199 | rs4811760 | rs4818281 | rs4823073 | rs4835265 | rs4840572 | rs484353  | rs4847412 |
| rs480823  | rs4812048 | rs481837  | rs4823173 | rs4835266 | rs4840638 | rs4843547 | rs4848100 |
| rs4808272 | rs4812056 | rs4818833 | rs4823178 | rs4835473 | rs4840639 | rs4843549 | rs4848124 |
| rs4808304 | rs481206  | rs481887  | rs4823182 | rs4835637 | rs484084  | rs4843550 | rs4848312 |
| rs4808360 | rs481214  | rs4818988 | rs4823308 | rs4835639 | rs4840913 | rs4843552 | rs4848366 |
| rs480840  | rs4812279 | rs481903  | rs4823309 | rs4835691 | rs4841006 | rs4843555 | rs4848367 |
| rs4808540 | rs4812322 | rs4819084 | rs482339  | rs4835948 | rs4841028 | rs4843560 | rs4848370 |
| rs4808566 | rs4812336 | rs481931  | rs4823878 | rs4836027 | rs4841029 | rs4843576 | rs4848490 |
| rs4808579 | rs4812383 | rs4819388 | rs4823881 | rs4836094 | rs4841072 | rs4843613 | rs4848599 |
| rs4808683 | rs4812405 | rs481940  | rs4824117 | rs4836133 | rs4841097 | rs4843724 | rs4848612 |
| rs4808737 | rs4812447 | rs4819527 | rs482507  | rs4836189 | rs4841132 | rs4843788 | rs4848643 |
| rs4808760 | rs4812448 | rs4819555 | rs482522  | rs4836245 | rs4841133 | rs4843869 | rs4848713 |
| rs4808762 | rs4812449 | rs4819618 | rs4825261 | rs4836373 | rs4841146 | rs4844096 | rs4848924 |
| rs4808766 | rs4812450 | rs4819852 | rs4825323 | rs4836519 | rs4841235 | rs4844177 | rs4848969 |
| rs4808773 | rs4812492 | rs4819855 | rs4825885 | rs4836579 | rs4841237 | rs4844289 | rs4849021 |
| rs4808779 | rs4812501 | rs4820023 | rs4825980 | rs4836591 | rs4841294 | rs4844299 | rs4849121 |
| rs4808801 | rs4812536 | rs4820091 | rs4826508 | rs4836600 | rs4841318 | rs4844390 | rs4849124 |
| rs4808955 | rs4812697 | rs482012  | rs4826594 | rs4836726 | rs4841335 | rs4844392 | rs4849134 |
| rs4808959 | rs4812772 | rs4820216 | rs4826631 | rs4836732 | rs4841356 | rs4844395 | rs4849135 |
| rs4808961 | rs4812818 | rs4820268 | rs4826645 | rs4836789 | rs4841409 | rs4844573 | rs4849147 |
| rs4808962 | rs4812829 | rs4820299 | rs4826685 | rs4836833 | rs4841411 | rs4844622 | rs484915  |
| rs4808964 | rs4812833 | rs4820318 | rs482786  | rs4836845 | rs4841436 | rs4844809 | rs4849169 |
| rs4808965 | rs4812972 | rs4820323 | rs482787  | rs4836906 | rs4841460 | rs4845124 | rs4849294 |
| rs4808981 | rs4813038 | rs4820324 | rs4828043 | rs4836927 | rs4841465 | rs4845140 | rs484943  |
| rs4808983 | rs4813224 | rs4820346 | rs482818  | rs4837104 | rs4841468 | rs4845353 | rs484959  |
| rs4809219 | rs4813371 | rs4820405 | rs4828621 | rs4837118 | rs4841470 | rs4845360 | rs4849701 |
| rs4809221 | rs4813454 | rs4820408 | rs482968  | rs4837181 | rs4841473 | rs4845364 | rs4849748 |
| rs4809324 | rs4813619 | rs4820410 | rs4829750 | rs4837197 | rs4841503 | rs4845402 | rs4849845 |
| rs4809330 | rs4813800 | rs4820425 | rs4829885 | rs4837502 | rs4841504 | rs4845454 | rs4849887 |
| rs4809335 | rs4813802 | rs4820434 | rs4829906 | rs4837565 | rs4841527 | rs4845459 | rs4850047 |
| rs4809361 | rs4813867 | rs4820437 | rs4830360 | rs4837580 | rs4841531 | rs4845570 | rs485030  |
| rs4809369 | rs4814175 | rs4820599 | rs4830411 | rs4837613 | rs4841567 | rs4845586 | rs4850712 |

|           |           |           |           |           |           |           |           |
|-----------|-----------|-----------|-----------|-----------|-----------|-----------|-----------|
| rs4850954 | rs4857855 | rs4868126 | rs4876361 | rs4886100 | rs4890568 | rs4899554 | rs4905794 |
| rs4850959 | rs4857914 | rs4868145 | rs4876400 | rs488614  | rs4890628 | rs4899652 | rs4905875 |
| rs4850980 | rs4857968 | rs4868149 | rs4876611 | rs4886140 | rs4890633 | rs4899737 | rs4905899 |
| rs4851016 | rs4858207 | rs4868180 | rs4876858 | rs4886207 | rs4890887 | rs4899746 | rs4905998 |
| rs4851031 | rs4858241 | rs4868181 | rs4876868 | rs488621  | rs4891780 | rs4899753 | rs4906037 |
| rs4851057 | rs4858253 | rs4868243 | rs4876992 | rs4886217 | rs4891786 | rs4900069 | rs4906048 |
| rs4851221 | rs4858582 | rs4868256 | rs4876993 | rs4886238 | rs489247  | rs4900109 | rs4906190 |
| rs4851250 | rs4858678 | rs4868329 | rs4877080 | rs4886425 | rs489286  | rs4900184 | rs4906234 |
| rs4851251 | rs4858682 | rs4868384 | rs4877152 | rs4886550 | rs489296  | rs4900236 | rs4906259 |
| rs4851253 | rs4858697 | rs4868444 | rs487722  | rs4886579 | rs489337  | rs4900384 | rs4906263 |
| rs4851254 | rs4858708 | rs4868748 | rs4877285 | rs4886580 | rs4894    | rs4900538 | rs4906272 |
| rs4851263 | rs4858757 | rs4868774 | rs4877313 | rs4886591 | rs4894132 | rs4900550 | rs490633  |
| rs4851266 | rs4858758 | rs4869022 | rs487732  | rs4886593 | rs4894192 | rs4900575 | rs4906335 |
| rs4851284 | rs4858802 | rs4869056 | rs4877516 | rs4886640 | rs4894495 | rs4900590 | rs4906364 |
| rs4851287 | rs4858819 | rs4869058 | rs4877815 | rs4886656 | rs4894529 | rs4900591 | rs490647  |
| rs4851300 | rs4858894 | rs4869139 | rs4878008 | rs4886659 | rs4894532 | rs4900715 | rs4906800 |
| rs4851313 | rs4858934 | rs4869314 | rs4878497 | rs4886669 | rs4894535 | rs4900716 | rs4906844 |
| rs4851462 | rs4858940 | rs4869412 | rs4878628 | rs4886696 | rs4894539 | rs4900759 | rs4907230 |
| rs4851529 | rs4859135 | rs4869589 | rs4878639 | rs4886699 | rs4894658 | rs4901012 | rs4907307 |
| rs4851541 | rs4859215 | rs4869723 | rs4878737 | rs4886755 | rs4894715 | rs4901118 | rs4907622 |
| rs4851551 | rs485929  | rs4869739 | rs487915  | rs4886776 | rs4894769 | rs4901308 | rs4908404 |
| rs4851592 | rs4859470 | rs4869742 | rs487952  | rs4886778 | rs4894797 | rs4901350 | rs4908508 |
| rs4851759 | rs4859571 | rs4869744 | rs4879656 | rs4886782 | rs4894803 | rs4901473 | rs4908677 |
| rs4852018 | rs4859610 | rs4869818 | rs487985  | rs4886849 | rs4895110 | rs4901536 | rs4908678 |
| rs4852252 | rs4859682 | rs4869859 | rs487990  | rs4886850 | rs4895120 | rs4901541 | rs4908760 |
| rs4852259 | rs486023  | rs4869893 | rs4880075 | rs4886860 | rs4895231 | rs4901977 | rs4908768 |
| rs4852316 | rs486036  | rs486995  | rs4880192 | rs4886869 | rs489531  | rs4902002 | rs4908769 |
| rs4852324 | rs486055  | rs4869965 | rs4880207 | rs4886920 | rs4895440 | rs4902243 | rs4908776 |
| rs4852567 | rs4860734 | rs4870    | rs488023  | rs4887023 | rs4895441 | rs4902244 | rs4908834 |
| rs4852777 | rs4860797 | rs4870034 | rs4880341 | rs488703  | rs4895455 | rs4902288 | rs4908972 |
| rs4852778 | rs4860987 | rs4870044 | rs4880735 | rs4887030 | rs4895650 | rs4902358 | rs4909017 |
| rs4852780 | rs486142  | rs4870056 | rs4881269 | rs4887057 | rs4895799 | rs4902389 | rs4909296 |
| rs4852785 | rs4862562 | rs4870941 | rs4881316 | rs4887059 | rs4895808 | rs4902407 | rs4909323 |
| rs4853    | rs4862848 | rs4871009 | rs488133  | rs4887067 | rs4895901 | rs4902562 | rs4909338 |
| rs4853283 | rs486349  | rs4871015 | rs4881702 | rs4887072 | rs4895915 | rs4902592 | rs4909561 |
| rs4853525 | rs4863516 | rs487107  | rs488200  | rs4887077 | rs4895927 | rs4902630 | rs490972  |
| rs485425  | rs4863517 | rs4871137 | rs4882315 | rs4887087 | rs4895959 | rs4902632 | rs4909932 |
| rs4854344 | rs4863692 | rs4871180 | rs4882760 | rs4887111 | rs4896038 | rs4902642 | rs4909945 |
| rs4854349 | rs4863875 | rs4871222 | rs4882970 | rs4887113 | rs4896068 | rs4902647 | rs4910165 |
| rs4854446 | rs486394  | rs487127  | rs4883198 | rs4887305 | rs4896104 | rs4902681 | rs4910179 |
| rs4854475 | rs4863988 | rs4871310 | rs4883201 | rs488769  | rs4896110 | rs4902704 | rs4910482 |
| rs4854572 | rs486416  | rs4871397 | rs488321  | rs4887872 | rs4896131 | rs4902741 | rs4910498 |
| rs4854760 | rs4864486 | rs487152  | rs4883263 | rs4888010 | rs4896153 | rs4902750 | rs4910511 |
| rs4854761 | rs4864530 | rs4871582 | rs4883480 | rs4888124 | rs4896199 | rs4902961 | rs491055  |
| rs485497  | rs4864709 | rs4871603 | rs4883481 | rs4888151 | rs4896307 | rs4903064 | rs4910735 |
| rs485499  | rs4864809 | rs4871611 | rs4883482 | rs4888262 | rs4896477 | rs4903199 | rs4910742 |
| rs4855019 | rs4864822 | rs4871624 | rs4883556 | rs4888362 | rs4896504 | rs4903203 | rs491087  |
| rs4855074 | rs4864836 | rs4871827 | rs4883565 | rs4888372 | rs4896582 | rs4903265 | rs4910914 |
| rs4855075 | rs4864847 | rs4871844 | rs4883580 | rs4888378 | rs4896598 | rs4903311 | rs4911180 |
| rs4855530 | rs4864858 | rs4871846 | rs488359  | rs4888379 | rs489693  | rs4903340 | rs4911241 |
| rs485554  | rs4864890 | rs4871849 | rs4883639 | rs4888387 | rs4897010 | rs4903557 | rs4911253 |
| rs4855559 | rs4865473 | rs4871905 | rs4883690 | rs4888411 | rs4897160 | rs490358  | rs4911259 |
| rs4855582 | rs4865512 | rs4871958 | rs4883723 | rs4888420 | rs4897178 | rs4903580 | rs4911268 |
| rs4855804 | rs4865540 | rs4872210 | rs4883777 | rs4888444 | rs4897179 | rs490434  | rs4911382 |
| rs4855838 | rs4865610 | rs4872310 | rs4883958 | rs4889    | rs4897182 | rs490445  | rs4911414 |
| rs4855928 | rs4865656 | rs4872393 | rs4884084 | rs4889016 | rs4897233 | rs4904503 | rs4911442 |
| rs4856019 | rs4865733 | rs487270  | rs4884166 | rs4889341 | rs4898521 | rs4904523 | rs4911466 |
| rs4856268 | rs4865762 | rs487321  | rs4884332 | rs4889345 | rs4898815 | rs4904670 | rs4911477 |
| rs4856278 | rs4865796 | rs4873492 | rs4884400 | rs4889606 | rs4899012 | rs4904738 | rs4911492 |
| rs485642  | rs4865884 | rs4873803 | rs4884468 | rs4889630 | rs4899178 | rs4904744 | rs4911494 |
| rs4856463 | rs4865911 | rs487404  | rs488476  | rs4889799 | rs4899258 | rs4904820 | rs491203  |
| rs4856763 | rs4865956 | rs4875043 | rs4885150 | rs4889891 | rs4899263 | rs4904871 | rs4912085 |
| rs4856961 | rs486650  | rs4875053 | rs4885151 | rs4890293 | rs4899280 | rs4904886 | rs4912090 |
| rs4857055 | rs4866650 | rs4875839 | rs488535  | rs4890355 | rs4899292 | rs4905    | rs4912144 |
| rs4857338 | rs4866846 | rs4875884 | rs4885512 | rs4890357 | rs4899339 | rs4905014 | rs4912182 |
| rs485742  | rs4867699 | rs4875958 | rs488566  | rs4890487 | rs4899412 | rs4905179 | rs4912332 |
| rs4857714 | rs4868125 | rs487624  | rs4885681 | rs4890489 | rs4899502 | rs4905192 | rs4912377 |

|           |           |           |             |           |           |           |           |
|-----------|-----------|-----------|-------------|-----------|-----------|-----------|-----------|
| rs4912440 | rs4919087 | rs4925750 | rs4934494   | rs4940255 | rs4947584 | rs4953256 | rs4961733 |
| rs4912485 | rs4919420 | rs492582  | rs4934609   | rs4940386 | rs4947644 | rs4953269 | rs4961737 |
| rs4912575 | rs4919594 | rs4925825 | rs4934618   | rs4940436 | rs4948088 | rs4953312 | rs4962034 |
| rs4912622 | rs4919624 | rs492594  | rs4934956-T | rs4940525 | rs4948097 | rs4953318 | rs4962035 |
| rs4912763 | rs4919669 | rs492602  | rs493519    | rs4940572 | rs4948100 | rs4953345 | rs4962085 |
| rs4912807 | rs4919683 | rs4926244 | rs4935356   | rs4940576 | rs4948102 | rs4953346 | rs4962104 |
| rs491283  | rs4919686 | rs4926298 | rs493573    | rs4940668 | rs4948106 | rs4953348 | rs4962130 |
| rs4912892 | rs4919687 | rs4926386 | rs4935786   | rs4940730 | rs4948418 | rs4953353 | rs4962144 |
| rs4912938 | rs4919694 | rs4926464 | rs4935884   | rs494091  | rs4948492 | rs495337  | rs4962153 |
| rs4913007 | rs4919695 | rs4926499 | rs4935987   | rs4941038 | rs4948496 | rs4953348 | rs4962223 |
| rs4913077 | rs4919883 | rs4926524 | rs4936043   | rs4941139 | rs4948498 | rs4953549 | rs4962295 |
| rs4913081 | rs4920605 | rs4926611 | rs4936059   | rs4941565 | rs4948523 | rs4953572 | rs4962322 |
| rs4913405 | rs4920608 | rs4926725 | rs4936098   | rs4941735 | rs4948643 | rs495360  | rs4962336 |
| rs4913408 | rs492063  | rs4926726 | rs4936099   | rs4941870 | rs4948645 | rs495366  | rs4962416 |
| rs4914930 | rs4920894 | rs4926854 | rs4936142   | rs494189  | rs4948925 | rs495367  | rs4962424 |
| rs4914984 | rs4921290 | rs4926923 | rs4936175   | rs4942300 | rs494904  | rs4953766 | rs4962461 |
| rs4915076 | rs4921301 | rs492699  | rs4936215   | rs494242  | rs4949146 | rs4954059 | rs4962691 |
| rs4915077 | rs4921482 | rs4927012 | rs4936216   | rs4942471 | rs4949223 | rs4954162 | rs4962692 |
| rs4915136 | rs4921483 | rs4927132 | rs4936277   | rs4942486 | rs4949324 | rs4954174 | rs4962694 |
| rs4915287 | rs4921484 | rs492738  | rs4936279   | rs494268  | rs4949448 | rs4954192 | rs4962699 |
| rs4915382 | rs4921492 | rs4927705 | rs4936290   | rs4942800 | rs4949454 | rs4954218 | rs4962716 |
| rs4915463 | rs4921493 | rs4927858 | rs4936518   | rs4942859 | rs4949459 | rs4954272 | rs4962725 |
| rs4915559 | rs4921542 | rs4928143 | rs4936637   | rs4942883 | rs4949460 | rs4954395 | rs4963128 |
| rs491567  | rs4921790 | rs4928176 | rs4936675   | rs4942889 | rs4949465 | rs4955417 | rs4963153 |
| rs4915735 | rs4921804 | rs492858  | rs4936771   | rs4942901 | rs4949489 | rs4955665 | rs4963156 |
| rs4915928 | rs4921913 | rs492899  | rs4937076   | rs4943305 | rs4949526 | rs4955883 | rs496321  |
| rs4916009 | rs4921914 | rs4929923 | rs4937122   | rs494356  | rs4949874 | rs4955890 | rs4963772 |
| rs4916068 | rs4921915 | rs4929927 | rs4937127   | rs4943729 | rs4950806 | rs4955912 | rs4963776 |
| rs491616  | rs4922591 | rs4929947 | rs4937291   | rs4943794 | rs4950928 | rs495593  | rs4963975 |
| rs4916229 | rs4922771 | rs4929949 | rs4937300   | rs4944062 | rs4950931 | rs4957026 | rs4963998 |
| rs4916253 | rs4922793 | rs4929965 | rs4937323   | rs4944092 | rs4950937 | rs4957048 | rs4964008 |
| rs491626  | rs4923460 | rs4930011 | rs4937324   | rs4944113 | rs4950981 | rs4957325 | rs4964058 |
| rs4916342 | rs4923536 | rs4930103 | rs4937333   | rs494453  | rs4951011 | rs4957528 | rs4964273 |
| rs4916478 | rs4923541 | rs4930152 | rs4937334   | rs494459  | rs4951018 | rs4957727 | rs4964511 |
| rs4916483 | rs4923555 | rs4930352 | rs4937362   | rs4944611 | rs4951022 | rs4958191 | rs4964656 |
| rs4916533 | rs4923556 | rs4930561 | rs4937514   | rs4944612 | rs4951074 | rs4958272 | rs4964677 |
| rs4916723 | rs4923735 | rs493063  | rs4937515   | rs4944662 | rs4951168 | rs495828  | rs496475  |
| rs4916737 | rs4923864 | rs4930718 | rs493786    | rs4944832 | rs4951179 | rs4958316 | rs4965425 |
| rs4916751 | rs4923910 | rs4930724 | rs4937860   | rs4944844 | rs4951254 | rs4958318 | rs4965426 |
| rs4916753 | rs4923914 | rs4930726 | rs4937872   | rs4944940 | rs4951258 | rs4958443 | rs4965430 |
| rs4916831 | rs4923919 | rs4930731 | rs4938021   | rs4945275 | rs4951261 | rs4958568 | rs4965500 |
| rs4916907 | rs492400  | rs4931000 | rs4938174   | rs494562  | rs4951315 | rs4958581 | rs4965529 |
| rs4917014 | rs4924345 | rs4931002 | rs4938230   | rs4945704 | rs4951365 | rs4958586 | rs4965593 |
| rs4917017 | rs4924346 | rs4931005 | rs4938247   | rs4945816 | rs4951377 | rs4958702 | rs4965598 |
| rs4917129 | rs4924410 | rs4931356 | rs4938303   | rs4945829 | rs4951378 | rs4958741 | rs4965869 |
| rs4917131 | rs4924450 | rs493152  | rs4938330   | rs4946087 | rs4951404 | rs4958754 | rs4965897 |
| rs4917168 | rs4924471 | rs493161  | rs4938344   | rs4946256 | rs495146  | rs4958880 | rs4966015 |
| rs4917278 | rs4924487 | rs4932143 | rs4938353   | rs4946689 | rs495203  | rs4958881 | rs4966020 |
| rs4917385 | rs4924525 | rs4932196 | rs4938490   | rs4946713 | rs4952073 | rs4959021 | rs4966024 |
| rs4917404 | rs4924544 | rs4932200 | rs4938534   | rs4946717 | rs4952211 | rs4959053 | rs4966025 |
| rs4917627 | rs4924590 | rs4932265 | rs4938573   | rs4946812 | rs495237  | rs4959106 | rs4966038 |
| rs4917628 | rs4924813 | rs4932370 | rs4938576   | rs4946935 | rs4952499 | rs4959130 | rs49675   |
| rs4917630 | rs492488  | rs4932371 | rs4938637   | rs4946938 | rs4952552 | rs4959193 | rs496783  |
| rs4917766 | rs4924997 | rs4932373 | rs4938642   | rs4947015 | rs4952558 | rs4959207 | rs4967882 |
| rs4917911 | rs4925065 | rs493258  | rs4938815   | rs4947019 | rs4952564 | rs4959406 | rs4967985 |
| rs4917940 | rs4925095 | rs4933152 | rs4938933   | rs4947120 | rs4952611 | rs4959652 | rs496800  |
| rs4918016 | rs4925109 | rs4933236 | rs4939034   | rs4947121 | rs4952632 | rs4959677 | rs4968051 |
| rs4918037 | rs4925114 | rs4933432 | rs4939208   | rs4947257 | rs4952668 | rs4960175 | rs4968127 |
| rs4918072 | rs4925159 | rs4933466 | rs4939490   | rs4947263 | rs4952673 | rs4960188 | rs4968200 |
| rs4918617 | rs4925166 | rs4933627 | rs4939567   | rs4947296 | rs4952896 | rs4960289 | rs4968339 |
| rs4918760 | rs4925184 | rs4933677 | rs493971    | rs4947311 | rs4952979 | rs4960295 | rs4968381 |
| rs4918796 | rs4925335 | rs4934001 | rs4939722   | rs4947340 | rs4953023 | rs4960297 | rs4968736 |
| rs4918798 | rs4925386 | rs4934173 | rs4939821   | rs4947344 | rs4953074 | rs4961252 | rs4968782 |
| rs4918814 | rs492571  | rs4934253 | rs4939827   | rs4947490 | rs4953076 | rs4961398 | rs4968794 |
| rs4918943 | rs4925747 | rs4934311 | rs4939883   | rs494752  | rs4953148 | rs4961485 | rs496907  |
| rs4918970 | rs4925748 | rs4934436 | rs494003    | rs4947534 | rs4953150 | rs4961705 | rs496908  |
| rs4918985 | rs4925749 | rs4934470 | rs4940236   | rs4947581 | rs4953152 | rs4961729 | rs4969141 |

|           |           |           |           |           |          |          |             |
|-----------|-----------|-----------|-----------|-----------|----------|----------|-------------|
| rs4969143 | rs497523  | rs4981245 | rs498872  | rs501942  | rs504217 | rs511875 | rs519790    |
| rs4969145 | rs4975528 | rs4981287 | rs4988781 | rs5019538 | rs504691 | rs51195  | rs519973    |
| rs4969178 | rs4975538 | rs498135  | rs4988900 | rs5019727 | rs504848 | rs511987 | rs519989    |
| rs4969179 | rs4975564 | rs498136  | rs4988958 | rs5019870 | rs504915 | rs512083 | rs520015    |
| rs4969183 | rs4975572 | rs4981370 | rs4989187 | rs5020097 | rs504963 | rs512121 | rs520095    |
| rs4969186 | rs4975616 | rs4981446 | rs4989244 | rs5020545 | rs505058 | rs512244 | rs520354    |
| rs4969373 | rs4975662 | rs4982211 | rs498936  | rs5020792 | rs505102 | rs512482 | rs520461    |
| rs4969386 | rs4976023 | rs4982708 | rs4991925 | rs5020946 | rs505110 | rs512579 | rs520525    |
| rs4969405 | rs4976028 | rs4982712 | rs4992300 | rs5021156 | rs505151 | rs512597 | rs520692    |
| rs4969407 | rs4976033 | rs4982731 | rs499293  | rs5021680 | rs505237 | rs5128   | rs520757    |
| rs4969426 | rs4976265 | rs498275  | rs499368  | rs5021727 | rs505399 | rs512921 | rs520800    |
| rs4969449 | rs4976269 | rs4982753 | rs499594  | rs5021979 | rs505401 | rs512948 | rs520829    |
| rs4969471 | rs4976270 | rs4983559 | rs499600  | rs5022636 | rs505404 | rs5130   | rs520954    |
| rs496954  | rs4976602 | rs4983589 | rs49969   | rs5022942 | rs505802 | rs513150 | rs5213      |
| rs4970485 | rs4976642 | rs4983590 | rs499697  | rs5023755 | rs505837 | rs513242 | rs521484    |
| rs4970634 | rs4976646 | rs4984496 | rs4997081 | rs502410  | rs505922 | rs513349 | rs5215      |
| rs4970658 | rs4976686 | rs4984497 | rs4997370 | rs5024204 | rs506000 | rs513357 | rs5219      |
| rs4970764 | rs4976790 | rs4984541 | rs4999127 | rs5024246 | rs506234 | rs513365 | rs521977    |
| rs4970834 | rs4976976 | rs4984613 | rs4999718 | rs5025401 | rs5063   | rs513374 | rs522110    |
| rs4970835 | rs4977213 | rs4984636 | rs499974  | rs5025564 | rs506338 | rs513953 | rs522162    |
| rs4970836 | rs4977397 | rs4984682 | rs5000565 | rs5025949 | rs506500 | rs513973 | rs522180    |
| rs4970837 | rs4977492 | rs498475  | rs5000944 | rs502627  | rs506585 | rs514192 | rs522308    |
| rs4970846 | rs4977574 | rs4984778 | rs5001409 | rs5026470 | rs506589 | rs514230 | rs522743    |
| rs4970926 | rs4977575 | rs4984815 | rs5001573 | rs5026472 | rs506597 | rs514328 | rs522749    |
| rs4970935 | rs497764  | rs4984820 | rs5002812 | rs502652  | rs506767 | rs514406 | rs522761    |
| rs4970966 | rs4977756 | rs4984890 | rs500321  | rs502716  | rs5068   | rs514438 | rs523066    |
| rs4971044 | rs4977839 | rs4984913 | rs5003492 | rs5027597 | rs507078 | rs514465 | rs523096    |
| rs4971059 | rs4977844 | rs4984916 | rs500359  | rs5029718 | rs507080 | rs514659 | rs523288    |
| rs4971079 | rs4977846 | rs4984922 | rs5004355 | rs5029924 | rs507139 | rs514716 | rs523395    |
| rs4971088 | rs4977858 | rs4984980 | rs5005389 | rs5029937 | rs507392 | rs514924 | rs523522    |
| rs4971089 | rs4977885 | rs4985155 | rs500555  | rs5029939 | rs507403 | rs515071 | rs523583    |
| rs4971091 | rs4978410 | rs4985167 | rs5006548 | rs5029949 | rs507666 | rs515135 | rs523604    |
| rs4971099 | rs4978866 | rs4985417 | rs5006884 | rs5029970 | rs507778 | rs515140 | rs523676    |
| rs4971100 | rs4978874 | rs4985445 | rs5007237 | rs5030044 | rs507856 | rs515186 | rs523865    |
| rs4971155 | rs4978929 | rs4985447 | rs500816  | rs5030049 | rs507964 | rs515385 | rs524137    |
| rs4971239 | rs4979080 | rs498547  | rs500830  | rs5030062 | rs508196 | rs515756 | rs524278    |
| rs4971253 | rs497916  | rs4985555 | rs5008399 | rs5030073 | rs508205 | rs515863 | rs524440    |
| rs4971516 | rs4979235 | rs4985718 | rs500976  | rs5030081 | rs508227 | rs516134 | rs524586    |
| rs4972322 | rs4979341 | rs4985726 | rs501057  | rs5030179 | rs508347 | rs516143 | rs524772    |
| rs4972356 | rs4979372 | rs4985996 | rs5010712 | rs5030241 | rs508419 | rs516246 | rs524859    |
| rs4972505 | rs4979462 | rs4986044 | rs501108  | rs5030283 | rs508487 | rs516316 | rs524903    |
| rs4972593 | rs4979467 | rs4986045 | rs5011100 | rs5030317 | rs508618 | rs516636 | rs524952    |
| rs4972699 | rs4979503 | rs4986080 | rs5011302 | rs503035  | rs508977 | rs5167   | rs525017    |
| rs4972748 | rs4979583 | rs4986167 | rs5011432 | rs5030397 | rs509035 | rs516805 | rs525028    |
| rs4972760 | rs4979590 | rs4986172 | rs5011579 | rs5030594 | rs509047 | rs516902 | rs525444    |
| rs4972805 | rs4979859 | rs4986790 | rs5011652 | rs5030672 | rs509208 | rs516921 | rs525592    |
| rs497309  | rs4979905 | rs4986791 | rs5012553 | rs5030755 | rs509256 | rs516946 | rs525678    |
| rs4973334 | rs4980067 | rs4986894 | rs501298  | rs5030764 | rs509325 | rs516953 | rs525773    |
| rs4973341 | rs4980169 | rs4986970 | rs5013026 | rs5030868 | rs509345 | rs517246 | rs525798    |
| rs497338  | rs4980379 | rs4987082 | rs501444  | rs5030873 | rs509360 | rs517261 | rs525988    |
| rs4973517 | rs4980383 | rs4987094 | rs501461  | rs5030937 | rs509399 | rs5174   | rs526231    |
| rs4973576 | rs4980389 | rs4987353 | rs5014650 | rs5030938 | rs509476 | rs517967 | rs526418    |
| rs4973598 | rs4980470 | rs4987354 | rs501470  | rs503188  | rs509533 | rs518039 | rs526631    |
| rs4973618 | rs4980483 | rs4987358 | rs5015480 | rs503279  | rs509728 | rs518394 | rs5268      |
| rs4973659 | rs4980515 | rs4987719 | rs5015933 | rs503366  | rs510062 | rs518425 | rs526896    |
| rs4973766 | rs4980524 | rs4987802 | rs5016282 | rs503397  | rs510314 | rs518594 | rs526934    |
| rs4973768 | rs4980525 | rs4987852 | rs5016898 | rs503464  | rs510372 | rs518600 | rs527297896 |
| rs4973769 | rs4980532 | rs4987855 | rs5017301 | rs503542  | rs510772 | rs518785 | rs527298592 |
| rs4974186 | rs4980572 | rs4987856 | rs5017302 | rs503598  | rs511041 | rs518839 | rs527320094 |
| rs4974291 | rs4980659 | rs4988135 | rs5017326 | rs5036    | rs511141 | rs518853 | rs527463211 |
| rs4974375 | rs4980661 | rs4988235 | rs5017416 | rs503662  | rs511154 | rs518867 | rs527478501 |
| rs497453  | rs4980662 | rs4988308 | rs501764  | rs503706  | rs5112   | rs519111 | rs527493184 |
| rs4974539 | rs498079  | rs4988321 | rs501791  | rs503734  | rs511217 | rs519113 | rs527504    |
| rs4974633 | rs4980877 | rs4988340 | rs5017948 | rs503905  | rs511515 | rs519238 | rs527528    |
| rs4975012 | rs4981022 | rs4988344 | rs5018269 | rs504045  | rs511651 | rs519417 | rs527543513 |
| rs4975016 | rs4981087 | rs4988362 | rs501916  | rs504082  | rs5117   | rs519464 | rs527582137 |
| rs4975128 | rs4981170 | rs4988483 | rs5019341 | rs504117  | rs511755 | rs519565 | rs527616    |

|             |             |             |             |             |             |             |             |
|-------------|-------------|-------------|-------------|-------------|-------------|-------------|-------------|
| rs527678952 | rs530007800 | rs532446    | rs534754110 | rs537226223 | rs539689071 | rs541815165 | rs544453779 |
| rs527692639 | rs530022    | rs532464664 | rs534767059 | rs537241153 | rs539846    | rs541862    | rs544467681 |
| rs527697748 | rs530130707 | rs532504    | rs534772444 | rs537301220 | rs539857911 | rs541867052 | rs544577047 |
| rs527725    | rs530159671 | rs532515683 | rs534800    | rs537328386 | rs539862993 | rs541889526 | rs544605    |
| rs527760788 | rs530203431 | rs532540191 | rs534840    | rs537404743 | rs539947600 | rs541907913 | rs544622120 |
| rs527825    | rs530210436 | rs532553681 | rs534849558 | rs537508    | rs540182926 | rs541928175 | rs544625    |
| rs527864481 | rs530257728 | rs532569968 | rs534851766 | rs537526354 | rs540188223 | rs541977430 | rs544668    |
| rs527890099 | rs530263367 | rs532591337 | rs534975221 | rs537579467 | rs5402      | rs541989586 | rs544677242 |
| rs527942    | rs530280439 | rs532636967 | rs535040323 | rs537596349 | rs540244401 | rs542036    | rs544722    |
| rs527953512 | rs530418693 | rs532737731 | rs535064984 | rs537626    | rs540254    | rs542220004 | rs544750399 |
| rs527963618 | rs530424960 | rs532749103 | rs535153283 | rs537635    | rs540281247 | rs542221686 | rs544802698 |
| rs528143584 | rs530454918 | rs532782761 | rs535209331 | rs537740323 | rs540315504 | rs542247589 | rs544873    |
| rs528161076 | rs530464314 | rs532797767 | rs535211063 | rs537750491 | rs540350    | rs542340    | rs544957562 |
| rs528167451 | rs530474810 | rs532836473 | rs535241194 | rs537841689 | rs540398642 | rs542418    | rs544978    |
| rs528176153 | rs530580221 | rs532990872 | rs535249    | rs537848612 | rs540400656 | rs542444    | rs545075    |
| rs528259074 | rs530685161 | rs533030436 | rs535263906 | rs537858427 | rs540403    | rs542516077 | rs545105162 |
| rs528266117 | rs530686    | rs533114253 | rs535286942 | rs537871337 | rs540409605 | rs542618547 | rs545160179 |
| rs52826764  | rs530696125 | rs533119559 | rs535305978 | rs537878    | rs540431    | rs542629    | rs545164273 |
| rs528298    | rs530764831 | rs533123    | rs535378844 | rs537879524 | rs540446851 | rs542639033 | rs545206972 |
| rs528301    | rs530803857 | rs533128213 | rs535469909 | rs537920412 | rs540485182 | rs542658159 | rs545261249 |
| rs528350911 | rs530829730 | rs533169403 | rs535520770 | rs537930    | rs540545522 | rs542675489 | rs545275919 |
| rs528352139 | rs530841299 | rs533217053 | rs535521164 | rs537942317 | rs540599    | rs542675670 | rs545317462 |
| rs528400393 | rs530885291 | rs533220    | rs535526948 | rs538021413 | rs540606    | rs542768261 | rs545366210 |
| rs528505236 | rs530894    | rs533229216 | rs535602077 | rs538063388 | rs540639423 | rs542809491 | rs545368698 |
| rs528528    | rs530916    | rs533259    | rs535612879 | rs538069859 | rs540652    | rs542831    | rs545393282 |
| rs528543374 | rs530960    | rs533276421 | rs535680968 | rs538147    | rs540653847 | rs542854259 | rs545435    |
| rs528568705 | rs531019    | rs533281866 | rs535726383 | rs538162817 | rs540671238 | rs542867945 | rs545480577 |
| rs528574314 | rs531025555 | rs5333      | rs535763563 | rs538216963 | rs540691    | rs542883    | rs545608    |
| rs528694087 | rs531034894 | rs533414974 | rs535777    | rs538325438 | rs540694424 | rs542939    | rs545634    |
| rs528718064 | rs531077    | rs533430670 | rs535819    | rs538356182 | rs540730    | rs542982358 | rs545709142 |
| rs528732638 | rs531082420 | rs533451950 | rs535842    | rs538358771 | rs540742    | rs543066687 | rs545776970 |
| rs528738    | rs531117    | rs533483    | rs535888    | rs538387289 | rs540747651 | rs543070    | rs545804325 |
| rs528755197 | rs531184891 | rs533493779 | rs535930    | rs538399    | rs540781594 | rs543143    | rs545833    |
| rs528776789 | rs531282607 | rs533549530 | rs536006581 | rs538498277 | rs540810730 | rs543159    | rs545836323 |
| rs528785443 | rs531302321 | rs533577    | rs536007    | rs538508139 | rs540824    | rs543179    | rs545853    |
| rs528806375 | rs531347476 | rs533614130 | rs536008226 | rs538509310 | rs540860    | rs543226695 | rs545858676 |
| rs528845403 | rs531359831 | rs533617    | rs536070968 | rs538579    | rs540860509 | rs543290203 | rs545968244 |
| rs528855147 | rs531407307 | rs533646    | rs536112833 | rs538605220 | rs540874    | rs543307500 | rs545979    |
| rs528863805 | rs531425523 | rs533649954 | rs536124151 | rs538628    | rs540885    | rs543356    | rs546131    |
| rs528908640 | rs531532863 | rs533650628 | rs536152521 | rs538656    | rs540909    | rs543431433 | rs546173111 |
| rs528927627 | rs531544016 | rs533703709 | rs536199747 | rs538745408 | rs540931816 | rs543503099 | rs546240    |
| rs528981060 | rs531612    | rs533722308 | rs536299    | rs538834286 | rs540948698 | rs543504257 | rs546280079 |
| rs529143892 | rs531639    | rs533883198 | rs536304170 | rs538838915 | rs540973884 | rs543594419 | rs546436080 |
| rs529174107 | rs531660643 | rs533898616 | rs536316182 | rs538845166 | rs541030121 | rs543650    | rs546436456 |
| rs529200    | rs531685993 | rs533946434 | rs536350318 | rs538937281 | rs541041    | rs543678598 | rs546475500 |
| rs529302116 | rs531702210 | rs534019417 | rs536371583 | rs539017487 | rs541092898 | rs543714    | rs546476261 |
| rs529320227 | rs531706    | rs534042887 | rs536397959 | rs539017525 | rs541102729 | rs543776173 | rs546498715 |
| rs529408809 | rs531709987 | rs534043    | rs536403690 | rs539030095 | rs541122270 | rs543811905 | rs546525796 |
| rs529482203 | rs531763    | rs534049724 | rs536522394 | rs539096    | rs541155877 | rs543838540 | rs546541682 |
| rs529541    | rs531864    | rs534076076 | rs536574218 | rs539100    | rs541160    | rs543874    | rs546552332 |
| rs529565    | rs531909210 | rs534141419 | rs536643418 | rs539108    | rs541341417 | rs543893408 | rs5467      |
| rs529602522 | rs531968440 | rs534191    | rs536665    | rs539123094 | rs541373378 | rs543894534 | rs546724    |
| rs529619980 | rs531971847 | rs534222792 | rs536720776 | rs539159088 | rs541464    | rs543895501 | rs546738875 |
| rs529623    | rs532093    | rs534291129 | rs536748263 | rs539206    | rs541524196 | rs543929820 | rs546743016 |
| rs529640451 | rs532201406 | rs534298147 | rs536796893 | rs539212981 | rs541558502 | rs543938798 | rs546810441 |
| rs529790043 | rs532213132 | rs534311    | rs536819065 | rs539218700 | rs541559418 | rs543948889 | rs546829    |
| rs529794364 | rs532246    | rs534342062 | rs536841    | rs539258868 | rs541590799 | rs544012    | rs546941547 |
| rs529850775 | rs532278511 | rs534389389 | rs536857    | rs539286190 | rs541591    | rs544169    | rs546966    |
| rs529866    | rs532279691 | rs534426436 | rs536859514 | rs539299744 | rs541594711 | rs544172318 | rs546979    |
| rs529874871 | rs532303    | rs534455553 | rs536864738 | rs539365473 | rs541601    | rs5442      | rs546982    |
| rs529876593 | rs532308916 | rs534463003 | rs5369      | rs539389645 | rs541650464 | rs544200874 | rs547025    |
| rs529898481 | rs532320857 | rs534541609 | rs5370      | rs539514    | rs5417      | rs544220997 | rs547039428 |
| rs529900    | rs532346435 | rs534567    | rs537005361 | rs539515    | rs541707256 | rs544235145 | rs547055536 |
| rs529954825 | rs532352152 | rs534645300 | rs537026504 | rs539524    | rs541740030 | rs544253    | rs547065676 |
| rs529967    | rs532398216 | rs534666677 | rs537069642 | rs5396      | rs541781976 | rs544274585 | rs5471      |
| rs529967472 | rs532400764 | rs534693155 | rs537120594 | rs539606836 | rs5418      | rs544365289 | rs547116    |
| rs529994558 | rs532436    | rs534698374 | rs537160    | rs539633309 | rs541803504 | rs544436097 | rs547116051 |

|             |             |             |             |             |             |             |             |
|-------------|-------------|-------------|-------------|-------------|-------------|-------------|-------------|
| rs547122663 | rs549596    | rs551833102 | rs553908921 | rs55636108  | rs55678495  | rs55707601  | rs55743011  |
| rs547130337 | rs549640876 | rs551851    | rs553951    | rs55637551  | rs55679363  | rs55708816  | rs55743914  |
| rs547138    | rs549656827 | rs551907009 | rs553962214 | rs55637647  | rs55680021  | rs55709272  | rs557441242 |
| rs547154    | rs549660100 | rs551924    | rs554019    | rs55637757  | rs55680960  | rs55709800  | rs55744193  |
| rs547160925 | rs549664712 | rs551929459 | rs554093579 | rs55639123  | rs55681357  | rs55710213  | rs55744319  |
| rs547171081 | rs549677458 | rs551947583 | rs554129480 | rs55639205  | rs556813706 | rs55710224  | rs55744743  |
| rs547181612 | rs549722413 | rs551980034 | rs554219    | rs55640000  | rs55681655  | rs557129696 | rs55745121  |
| rs547190239 | rs549752    | rs551980123 | rs554243    | rs556412194 | rs55682243  | rs55713716  | rs55745410  |
| rs547195    | rs549752801 | rs552000644 | rs554302100 | rs55641330  | rs55683214  | rs557139647 | rs557462    |
| rs547251    | rs5498      | rs552125    | rs554380258 | rs55641580  | rs55683806  | rs55714120  | rs55747707  |
| rs547320937 | rs549841725 | rs552277422 | rs554552    | rs55641816  | rs55683935  | rs55714647  | rs55747751  |
| rs547353809 | rs549845    | rs552283803 | rs554620424 | rs55642258  | rs55684003  | rs55714927  | rs55748329  |
| rs547364    | rs549853    | rs552304070 | rs554631314 | rs55642704  | rs55684140  | rs55715288  | rs55748921  |
| rs547433428 | rs549888    | rs552305    | rs554632176 | rs55642707  | rs55684236  | rs55715427  | rs55749333  |
| rs547500393 | rs549920468 | rs552414155 | rs554734    | rs556429    | rs55684690  | rs55716188  | rs55749605  |
| rs547509922 | rs549940584 | rs552522200 | rs554743    | rs55644114  | rs556848661 | rs55716899  | rs55750009  |
| rs547545    | rs549956721 | rs552557467 | rs554808052 | rs55644315  | rs55685171  | rs55719924  | rs55750792  |
| rs547595393 | rs549961083 | rs552599526 | rs554853027 | rs556443619 | rs55686445  | rs55720021  | rs557526151 |
| rs547691407 | rs550057    | rs552609473 | rs555018269 | rs55644439  | rs55686925  | rs557210704 | rs55753056  |
| rs547770310 | rs550065584 | rs552633    | rs555025179 | rs55645596  | rs55688536  | rs55721325  | rs55753183  |
| rs547859046 | rs550185027 | rs552649178 | rs555038    | rs55645776  | rs55688751  | rs557213785 | rs55753638  |
| rs547871726 | rs550235164 | rs552668607 | rs555044    | rs55646091  | rs55689260  | rs55722036  | rs55754029  |
| rs547908752 | rs550249321 | rs552693039 | rs555091    | rs55646170  | rs55689442  | rs55722102  | rs55754224  |
| rs547932535 | rs550300074 | rs552707    | rs555123328 | rs55646464  | rs55690609  | rs55722650  | rs55754265  |
| rs547948198 | rs550317996 | rs552708909 | rs555179612 | rs556469092 | rs55691047  | rs55723723  | rs557544    |
| rs548015135 | rs550369338 | rs552743052 | rs555181635 | rs55648125  | rs55691245  | rs55724477  | rs55754532  |
| rs548129723 | rs550436640 | rs552744792 | rs555203107 | rs55648711  | rs55691975  | rs55725278  | rs55754731  |
| rs548145    | rs550463489 | rs552761103 | rs555212    | rs55649226  | rs55692029  | rs557266652 | rs55755259  |
| rs548206459 | rs550477355 | rs552809365 | rs555218597 | rs55649657  | rs55692232  | rs55726687  | rs55756407  |
| rs548223088 | rs550478017 | rs552846225 | rs555222135 | rs55650043  | rs55692303  | rs55726902  | rs55756957  |
| rs548234    | rs550510    | rs552886585 | rs555234816 | rs55650056  | rs55692411  | rs557277320 | rs55757919  |
| rs548235873 | rs550513    | rs552965    | rs555280966 | rs55650691  | rs55692468  | rs55727837  | rs55758160  |
| rs548236486 | rs550530305 | rs552976    | rs555328608 | rs55652051  | rs55692656  | rs55728336  | rs55759218  |
| rs548288    | rs550548705 | rs552988313 | rs555346412 | rs55653563  | rs55693294  | rs55728759  | rs557604438 |
| rs548291389 | rs550600266 | rs552992303 | rs555425887 | rs55657775  | rs55693403  | rs55729107  | rs55760851  |
| rs548304    | rs550612036 | rs553012877 | rs555464135 | rs55657917  | rs55694272  | rs55730005  | rs55761633  |
| rs548451594 | rs550614297 | rs553016583 | rs555520    | rs55658222  | rs55694368  | rs557304297 | rs55762028  |
| rs548466113 | rs550617350 | rs553051    | rs555535764 | rs55658396  | rs55694701  | rs55730499  | rs55762216  |
| rs548487604 | rs550621    | rs553084547 | rs555591583 | rs55658481  | rs55695203  | rs55730982  | rs55762590  |
| rs548488926 | rs550628400 | rs553093210 | rs555594022 | rs55658584  | rs55695634  | rs557311052 | rs55762624  |
| rs548509555 | rs550677    | rs553096047 | rs555625    | rs556587    | rs55696495  | rs55731231  | rs55762977  |
| rs548547376 | rs550685946 | rs553108    | rs555636223 | rs55659150  | rs55696509  | rs55731315  | rs55763037  |
| rs548563531 | rs550767741 | rs553304    | rs555730055 | rs556595229 | rs55697131  | rs55731932  | rs55764512  |
| rs548630    | rs550780826 | rs553314025 | rs555754    | rs55661102  | rs55698046  | rs55731938  | rs55765314  |
| rs548688766 | rs550805650 | rs553316    | rs555754158 | rs556611356 | rs556990    | rs55732192  | rs557657187 |
| rs548732    | rs550937743 | rs553397860 | rs555759341 | rs55661361  | rs556990455 | rs55732421  | rs557660440 |
| rs548785130 | rs5510      | rs553399706 | rs555784    | rs55661368  | rs556992087 | rs55732507  | rs557663478 |
| rs548825905 | rs551011992 | rs553427    | rs555835    | rs55662133  | rs556994851 | rs55733296  | rs55766809  |
| rs548850890 | rs551014092 | rs553470220 | rs555921670 | rs55664157  | rs55700285  | rs557338857 | rs55767272  |
| rs548853    | rs551087    | rs553577764 | rs555925    | rs55664914  | rs55700449  | rs55734382  | rs55767675  |
| rs548873184 | rs551118    | rs553600342 | rs555962557 | rs556651803 | rs55700915  | rs55734480  | rs55767890  |
| rs548897    | rs551125    | rs553616728 | rs556052    | rs556656573 | rs55701159  | rs557350916 | rs55768116  |
| rs548944057 | rs551191707 | rs553620963 | rs556107    | rs55665837  | rs55701306  | rs55735426  | rs55768285  |
| rs548948244 | rs5512      | rs553682607 | rs556161    | rs55665939  | rs55701312  | rs55735727  | rs55768579  |
| rs548987    | rs551225    | rs553685714 | rs556175248 | rs55666429  | rs55702649  | rs55736121  | rs557685919 |
| rs549035841 | rs551238    | rs553701682 | rs556189727 | rs55667203  | rs55702830  | rs55736314  | rs55768819  |
| rs549058    | rs551320013 | rs553725343 | rs556197358 | rs556692495 | rs55703445  | rs55736786  | rs55769038  |
| rs549175319 | rs551353004 | rs553741    | rs556207545 | rs55671930  | rs55703462  | rs55737161  | rs55769264  |
| rs549182    | rs551382282 | rs553749201 | rs556234993 | rs55672249  | rs55703767  | rs55737395  | rs55769542  |
| rs549220260 | rs551473284 | rs553772010 | rs55633163  | rs55672708  | rs55704295  | rs557375932 | rs55770502  |
| rs549258056 | rs551513405 | rs553785    | rs55633823  | rs55673946  | rs55705705  | rs55738054  | rs55770976  |
| rs549280    | rs551517    | rs553827153 | rs556339    | rs55674450  | rs55705857  | rs55738118  | rs55771023  |
| rs549302    | rs551624271 | rs553840798 | rs55633929  | rs55675587  | rs55706246  | rs55738232  | rs55771168  |
| rs549361352 | rs551640889 | rs553844888 | rs55634885  | rs55676755  | rs55706311  | rs55739257  | rs55771535  |
| rs549362382 | rs551672892 | rs553864359 | rs55635148  | rs55676934  | rs55706446  | rs55740552  | rs55771711  |
| rs549435091 | rs551720    | rs553889    | rs556352260 | rs55677225  | rs55707100  | rs557408368 | rs55771809  |
| rs549579958 | rs551831489 | rs553901631 | rs55635402  | rs55678414  | rs557074    | rs55742087  | rs55771973  |

|             |             |             |             |             |             |             |             |
|-------------|-------------|-------------|-------------|-------------|-------------|-------------|-------------|
| rs55772859  | rs55809639  | rs55855238  | rs558830051 | rs55925913  | rs55962409  | rs56003038  | rs56044892  |
| rs55772938  | rs55810204  | rs55856036  | rs55884799  | rs559267    | rs55963623  | rs56004000  | rs56045941  |
| rs55773927  | rs55812705  | rs558560635 | rs55885134  | rs559270    | rs55964818  | rs56005245  | rs56046450  |
| rs55775505  | rs558133    | rs558567978 | rs55885610  | rs55927253  | rs55965054  | rs56006260  | rs56047520  |
| rs55776024  | rs55813438  | rs55857134  | rs55886426  | rs55929207  | rs559651557 | rs56006724  | rs56048141  |
| rs55776147  | rs55813792  | rs55857306  | rs558874116 | rs55929214  | rs55965801  | rs56006730  | rs56049037  |
| rs55776777  | rs55814654  | rs55857387  | rs55888180  | rs55930209  | rs55966114  | rs56007616  | rs56049331  |
| rs55777228  | rs55815151  | rs55857565  | rs558882    | rs55930424  | rs55966194  | rs56007784  | rs56049491  |
| rs55777621  | rs558163186 | rs558577    | rs55888531  | rs55930652  | rs559664    | rs56008802  | rs56050415  |
| rs55778236  | rs558163981 | rs55858457  | rs55888547  | rs55931012  | rs55966607  | rs56009477  | rs56051278  |
| rs55779678  | rs55816619  | rs55859054  | rs55889195  | rs55931203  | rs55966801  | rs56009602  | rs56054109  |
| rs55779933  | rs55817211  | rs55859553  | rs55890339  | rs55932213  | rs55968914  | rs560097346 | rs56054257  |
| rs55780018  | rs55817236  | rs55860526  | rs558908040 | rs55932597  | rs559693545 | rs560102628 | rs56054309  |
| rs55780162  | rs55817891  | rs55861089  | rs558916355 | rs55932951  | rs55970405  | rs56011044  | rs560546550 |
| rs55781197  | rs55818311  | rs558610964 | rs55891665  | rs559351615 | rs55971017  | rs56011263  | rs56055503  |
| rs55781332  | rs55818536  | rs55861694  | rs55892100  | rs55935382  | rs55971426  | rs56011514  | rs56055826  |
| rs55781567  | rs55818584  | rs55862167  | rs55892892  | rs55935482  | rs55971447  | rs560119293 | rs560564311 |
| rs55784307  | rs55819434  | rs55863214  | rs55893317  | rs559355    | rs55972016  | rs56012105  | rs56057703  |
| rs55784630  | rs558199115 | rs55863869  | rs55893771  | rs55935819  | rs55972276  | rs56012466  | rs56058331  |
| rs55785027  | rs55821258  | rs558639320 | rs55894132  | rs559370413 | rs55972630  | rs56013828  | rs56059523  |
| rs55785724  | rs55821517  | rs55864163  | rs55894533  | rs55937634  | rs55974014  | rs56013963  | rs56059702  |
| rs55786114  | rs55823170  | rs55864511  | rs55894859  | rs559377462 | rs55975060  | rs56014906  | rs560600212 |
| rs55786907  | rs55823223  | rs558655224 | rs55895004  | rs55938024  | rs55975541  | rs560152536 | rs56060058  |
| rs557871456 | rs55823627  | rs55865625  | rs55896564  | rs55938136  | rs55975637  | rs56015600  | rs56060724  |
| rs55787537  | rs55824078  | rs558657497 | rs55896900  | rs55938743  | rs55977282  | rs56016333  | rs56062135  |
| rs55787807  | rs55824262  | rs55866012  | rs558971    | rs559390    | rs559777577 | rs56017561  | rs560625443 |
| rs55788912  | rs55826493  | rs55866046  | rs55897509  | rs55939211  | rs559788767 | rs560176773 | rs56062828  |
| rs557899    | rs55827343  | rs55866125  | rs558988054 | rs55939240  | rs55978930  | rs56017932  | rs56062839  |
| rs55791371  | rs55827759  | rs558671668 | rs55899248  | rs55939347  | rs55979457  | rs56018450  | rs560632070 |
| rs55791516  | rs55828716  | rs55867249  | rs55899456  | rs55940034  | rs55980421  | rs56019505  | rs56063440  |
| rs55792153  | rs55829013  | rs55867305  | rs55900829  | rs559401098 | rs559814    | rs56020376  | rs56065557  |
| rs557933    | rs55829085  | rs55868394  | rs55901013  | rs55940342  | rs55981798  | rs560221037 | rs56066681  |
| rs55793313  | rs55829990  | rs55868514  | rs55901436  | rs559406    | rs55981836  | rs56022653  | rs56068469  |
| rs55793580  | rs55831503  | rs55869022  | rs55902013  | rs559407214 | rs55981844  | rs56023709  | rs56068534  |
| rs55794721  | rs55831773  | rs55869023  | rs559047    | rs55940751  | rs55981861  | rs560238897 | rs56068671  |
| rs55794899  | rs55831924  | rs55869368  | rs55905169  | rs559408609 | rs55982282  | rs56024251  | rs56068891  |
| rs557951    | rs55833042  | rs55869381  | rs559054    | rs55941320  | rs55983207  | rs560242923 | rs56069042  |
| rs557951828 | rs55833108  | rs55870008  | rs55905547  | rs55941720  | rs55983424  | rs56024659  | rs56069439  |
| rs55795858  | rs55834529  | rs558702    | rs55905691  | rs55941903  | rs55983731  | rs560276033 | rs56070533  |
| rs557966248 | rs558363983 | rs558710130 | rs55906059  | rs55942317  | rs55984493  | rs56028521  | rs56071466  |
| rs55796722  | rs55836402  | rs55872084  | rs55906289  | rs55942822  | rs55985553  | rs56030824  | rs56072276  |
| rs55796939  | rs55836809  | rs558725158 | rs55908337  | rs55944055  | rs55985730  | rs56031192  | rs560725045 |
| rs55797833  | rs55836957  | rs55872725  | rs55908509  | rs55944129  | rs55985762  | rs56031625  | rs56073406  |
| rs55797987  | rs55837381  | rs55872852  | rs55908605  | rs55944332  | rs55986470  | rs560316793 | rs56073414  |
| rs55798132  | rs55838263  | rs55873183  | rs55909515  | rs55945499  | rs55986493  | rs56032325  | rs56074300  |
| rs55798953  | rs55838622  | rs55874297  | rs55910052  | rs55945853  | rs55986545  | rs56032805  | rs56074687  |
| rs55799208  | rs55839241  | rs55874505  | rs559128832 | rs559462124 | rs55986781  | rs56034708  | rs56075219  |
| rs55799551  | rs55839877  | rs55874708  | rs55913164  | rs55946490  | rs55987409  | rs560350077 | rs560755235 |
| rs558003    | rs55840331  | rs55875066  | rs55913542  | rs55946513  | rs55987642  | rs56036047  | rs56075542  |
| rs55800473  | rs55840414  | rs55875222  | rs55914222  | rs55947051  | rs55988292  | rs56036086  | rs56076326  |
| rs55800572  | rs55841377  | rs55876337  | rs55914958  | rs559474507 | rs55988870  | rs56036119  | rs56076449  |
| rs55800589  | rs55841409  | rs55876360  | rs55916943  | rs55949311  | rs55989340  | rs56036545  | rs56076457  |
| rs558006880 | rs55842281  | rs55876513  | rs55917969  | rs55951234  | rs559902765 | rs560380    | rs56077333  |
| rs55801537  | rs558443    | rs55877758  | rs559181    | rs55951892  | rs55992320  | rs560381515 | rs56077950  |
| rs55801554  | rs55844438  | rs55878006  | rs55918235  | rs55953134  | rs559928    | rs56038322  | rs56078345  |
| rs55802315  | rs55846652  | rs55878063  | rs55918334  | rs55953331  | rs55993110  | rs56038390  | rs560785633 |
| rs55804009  | rs55846845  | rs55879323  | rs55920843  | rs55954001  | rs55993634  | rs56038439  | rs56078812  |
| rs55804343  | rs55848380  | rs55879743  | rs55921103  | rs55954186  | rs55993664  | rs560384646 | rs56079856  |
| rs55804368  | rs55849728  | rs55880046  | rs55921136  | rs55954384  | rs55994220  | rs56040212  | rs56080040  |
| rs55805447  | rs55850027  | rs55881007  | rs55922628  | rs559546873 | rs55995100  | rs560404165 | rs56080166  |
| rs55806728  | rs55851300  | rs558811955 | rs55922880  | rs559555    | rs55996750  | rs560415    | rs56080343  |
| rs55807115  | rs55853354  | rs55881236  | rs559231    | rs55958435  | rs559972    | rs560426    | rs56081191  |
| rs558074929 | rs55853677  | rs55881709  | rs55923289  | rs55958997  | rs55997507  | rs56043070  | rs56081685  |
| rs55807512  | rs55853698  | rs55882075  | rs559233    | rs55961674  | rs55998444  | rs560436873 | rs56081887  |
| rs55807911  | rs55853946  | rs558821319 | rs55924432  | rs55962025  | rs560001710 | rs56044142  | rs56082403  |
| rs55808324  | rs55854228  | rs55882426  | rs55924785  | rs55962158  | rs56000661  | rs56044565  | rs560826864 |
| rs55808472  | rs55854248  | rs55882710  | rs55924855  | rs55962377  | rs560026225 | rs56044682  | rs56084168  |



|             |             |             |             |             |             |             |             |
|-------------|-------------|-------------|-------------|-------------|-------------|-------------|-------------|
| rs56084311  | rs56123029  | rs561619482 | rs56200518  | rs562306828 | rs56267269  | rs56302931  | rs56336338  |
| rs56084662  | rs561241    | rs561623787 | rs56200889  | rs56231335  | rs56267346  | rs56303031  | rs56336520  |
| rs56084922  | rs56125409  | rs56162738  | rs56201652  | rs56232028  | rs56267605  | rs56303487  | rs56336971  |
| rs56085180  | rs561258676 | rs56162812  | rs562022020 | rs56232506  | rs56267624  | rs56304346  | rs56337010  |
| rs56087288  | rs56125973  | rs56163509  | rs56202412  | rs56232812  | rs56268063  | rs56304645  | rs56337033  |
| rs56087321  | rs56125990  | rs56163845  | rs56202902  | rs56233004  | rs56268708  | rs56305452  | rs56337234  |
| rs56088284  | rs561263417 | rs56163935  | rs56203712  | rs56233017  | rs562698611 | rs56306491  | rs56337305  |
| rs56088330  | rs56127672  | rs56164821  | rs56204511  | rs56233205  | rs56270164  | rs563072220 | rs56338130  |
| rs56088557  | rs56129017  | rs56165099  | rs56204594  | rs56233426  | rs56271032  | rs56308324  | rs56338922  |
| rs560887    | rs56129102  | rs561654715 | rs56204645  | rs562338    | rs56271783  | rs56309145  | rs56339059  |
| rs56088754  | rs56129466  | rs56165474  | rs56205282  | rs56233836  | rs56272844  | rs563110    | rs56339712  |
| rs56089836  | rs56129505  | rs561655    | rs56205630  | rs56234707  | rs56273049  | rs56311349  | rs56340041  |
| rs56090699  | rs56130071  | rs56166703  | rs56205728  | rs56235204  | rs56273245  | rs56312905  | rs56340469  |
| rs56090758  | rs56130222  | rs56166763  | rs56205943  | rs56235234  | rs56274609  | rs563132    | rs56340485  |
| rs560920364 | rs56130357  | rs56167332  | rs56206275  | rs56235417  | rs56275179  | rs56313227  | rs56340489  |
| rs56094005  | rs56130739  | rs56167574  | rs56208390  | rs56235845  | rs562752749 | rs56313611  | rs563406543 |
| rs56094641  | rs56131188  | rs56168014  | rs56208656  | rs56236159  | rs562760    | rs56314503  | rs56341938  |
| rs56094667  | rs56131196  | rs56168262  | rs56208677  | rs56236451  | rs56277523  | rs56315139  | rs56343114  |
| rs56095176  | rs561312719 | rs56168640  | rs56208742  | rs56237759  | rs56277911  | rs563151485 | rs56344893  |
| rs56095240  | rs56131490  | rs56168933  | rs56209154  | rs56237852  | rs56278466  | rs56316046  | rs56347314  |
| rs56097173  | rs56131511  | rs56169403  | rs56209921  | rs562386202 | rs56279768  | rs56317071  | rs56348580  |
| rs560977020 | rs56131903  | rs56170783  | rs56211149  | rs56238630  | rs56280896  | rs56318008  | rs56348792  |
| rs56097917  | rs56133113  | rs56171318  | rs56211164  | rs56238684  | rs56280951  | rs56318386  | rs56348932  |
| rs56098450  | rs56133301  | rs56171536  | rs56211325  | rs56238729  | rs56281058  | rs56318666  | rs56349329  |
| rs56099375  | rs56133505  | rs561722    | rs56212732  | rs562398803 | rs56281442  | rs56318916  | rs56349397  |
| rs56100731  | rs56133507  | rs561732    | rs56212745  | rs562408    | rs56281640  | rs56319043  | rs56351202  |
| rs56101042  | rs56133626  | rs56174996  | rs56213322  | rs56240884  | rs56282503  | rs56319620  | rs563519350 |
| rs561024707 | rs56133711  | rs56175115  | rs56213534  | rs562410    | rs562825263 | rs56319902  | rs56352102  |
| rs56103247  | rs56133913  | rs56175671  | rs562138031 | rs56241813  | rs56282717  | rs56320441  | rs56352403  |
| rs56104184  | rs561341    | rs56176327  | rs56214516  | rs56242353  | rs56282762  | rs56320921  | rs56352451  |
| rs56104880  | rs56135405  | rs56177354  | rs56214831  | rs56242843  | rs56283067  | rs56322409  | rs56353819  |
| rs56105022  | rs56135409  | rs56178309  | rs56215311  | rs56243018  | rs562832939 | rs56322472  | rs56354901  |
| rs56106601  | rs56135595  | rs56179458  | rs56216219  | rs56243392  | rs56283745  | rs56322953  | rs563555492 |
| rs56106611  | rs56135662  | rs56179563  | rs56216811  | rs562434    | rs56283750  | rs56323117  | rs56355754  |
| rs561079    | rs56138756  | rs56179616  | rs56217149  | rs56243511  | rs56283944  | rs56323848  | rs56356382  |
| rs56108300  | rs56140069  | rs56180262  | rs56217315  | rs562439614 | rs56284045  | rs56324019  | rs56356600  |
| rs561089333 | rs56140206  | rs56180486  | rs56218501  | rs56244258  | rs56284621  | rs56324858  | rs56357032  |
| rs561089663 | rs56141370  | rs561808962 | rs562189384 | rs56247223  | rs56285369  | rs56324967  | rs56357549  |
| rs56109436  | rs561417389 | rs56181519  | rs56219066  | rs56248155  | rs56287412  | rs56325564  | rs563592774 |
| rs561102    | rs56142708  | rs56181683  | rs56219465  | rs56249413  | rs56287436  | rs56326021  | rs56360320  |
| rs56112115  | rs56143613  | rs561821    | rs56219475  | rs56249585  | rs56287626  | rs56326046  | rs56361048  |
| rs56112137  | rs56144414  | rs561823900 | rs56220231  | rs56249713  | rs56288724  | rs56326811  | rs56361249  |
| rs56112295  | rs56144648  | rs56184018  | rs56220902  | rs56249772  | rs56288844  | rs56326811  | rs56361645  |
| rs561136    | rs561447462 | rs56184305  | rs562212325 | rs56252104  | rs562893740 | rs563290    | rs56361700  |
| rs56113850  | rs56147623  | rs56184400  | rs562213    | rs562526020 | rs56289631  | rs56329057  | rs56363908  |
| rs56114371  | rs56148728  | rs56185013  | rs56221553  | rs56253836  | rs56289821  | rs563290728 | rs56364292  |
| rs56114678  | rs56149994  | rs56185026  | rs56221586  | rs56254331  | rs56290130  | rs56329252  | rs56365029  |
| rs56115013  | rs56150095  | rs56186852  | rs56223081  | rs56255629  | rs56290609  | rs563296    | rs56365317  |
| rs56115971  | rs56150366  | rs56187480  | rs56223526  | rs56256194  | rs56290730  | rs56329702  | rs56365443  |
| rs56116020  | rs561512331 | rs56188194  | rs56223908  | rs56256371  | rs56290975  | rs563299077 | rs56365817  |
| rs56116032  | rs56151722  | rs56188374  | rs56223946  | rs562571184 | rs562920588 | rs56330132  | rs56365914  |
| rs56116382  | rs56151937  | rs56188432  | rs56223983  | rs562573028 | rs56292801  | rs56330207  | rs56366063  |
| rs56116444  | rs561519875 | rs56188862  | rs56224965  | rs56258039  | rs56293029  | rs56330463  | rs56367447  |
| rs56116661  | rs56152251  | rs56188865  | rs56225270  | rs56258221  | rs56293203  | rs563306865 | rs56367474  |
| rs56116740  | rs56153133  | rs56189455  | rs56225285  | rs56259139  | rs56293330  | rs56330886  | rs56368231  |
| rs56116847  | rs56154925  | rs56189574  | rs56225588  | rs562609617 | rs56294784  | rs56331133  | rs56368594  |
| rs56117721  | rs561561    | rs56191141  | rs56225803  | rs56261258  | rs562966    | rs56332871  | rs56369308  |
| rs561177583 | rs56156922  | rs56192752  | rs56225966  | rs56261297  | rs56297224  | rs56333866  | rs563697    |
| rs56117787  | rs56157503  | rs561931    | rs56226325  | rs56261514  | rs562974282 | rs56335290  | rs56369990  |
| rs56117848  | rs56158183  | rs561935387 | rs56226335  | rs56262138  | rs56298917  | rs56335308  | rs56370020  |
| rs56117933  | rs56159016  | rs56194430  | rs56226746  | rs56262607  | rs56299331  | rs56335503  | rs56372231  |
| rs56118554  | rs56159337  | rs56195122  | rs56227024  | rs56262900  | rs56299595  | rs56335522  | rs56372408  |
| rs56118925  | rs56159798  | rs56195338  | rs56228409  | rs56263064  | rs56299741  | rs56335585  | rs56372506  |
| rs56119742  | rs56160221  | rs561968051 | rs56228609  | rs56264193  | rs56300819  | rs56335910  | rs56372821  |
| rs56121005  | rs56160301  | rs56196860  | rs56228832  | rs56264696  | rs56300905  | rs563360564 | rs56373295  |
| rs56121637  | rs56160517  | rs56197624  | rs56228924  | rs56265363  | rs56302494  | rs56336142  | rs563738408 |
| rs561222871 | rs56160518  | rs561980690 | rs56230350  | rs562661763 | rs56302516  | rs56336280  | rs56374431  |

|             |             |             |             |             |             |             |             |
|-------------|-------------|-------------|-------------|-------------|-------------|-------------|-------------|
| rs56374507  | rs56402930  | rs565924    | rs567479228 | rs56861435  | rs56962872  | rs570995629 | rs571930760 |
| rs56374617  | rs56403421  | rs565931739 | rs567508    | rs568617    | rs569635361 | rs571037730 | rs571971615 |
| rs56374641  | rs564036233 | rs566067181 | rs567534295 | rs568624610 | rs56968997  | rs57104699  | rs57199709  |
| rs56375023  | rs56404467  | rs566071263 | rs567544458 | rs568630420 | rs56969212  | rs57107575  | rs57201028  |
| rs56375208  | rs56405138  | rs566125    | rs56755526  | rs568645819 | rs569747736 | rs571084788 | rs57201697  |
| rs56375629  | rs564051400 | rs566192    | rs56757486  | rs568656    | rs569778919 | rs57111852  | rs572017058 |
| rs563763403 | rs56405342  | rs566204    | rs56768485  | rs56868629  | rs56978598  | rs571122175 | rs572017140 |
| rs56376587  | rs564058644 | rs566217606 | rs567730888 | rs568688    | rs56979318  | rs57112968  | rs57204268  |
| rs56376592  | rs56406125  | rs566237    | rs567754    | rs56870864  | rs569795903 | rs571133    | rs572076167 |
| rs56376645  | rs56406311  | rs566405365 | rs56775891  | rs56873913  | rs56981891  | rs57113693  | rs572119521 |
| rs56378716  | rs56407180  | rs566422764 | rs56775982  | rs56875112  | rs56981934  | rs57116599  | rs57212245  |
| rs56378979  | rs56408111  | rs566465    | rs567779929 | rs568754328 | rs569868609 | rs571167884 | rs57213254  |
| rs56379725  | rs56408212  | rs566528532 | rs567805973 | rs568777    | rs56990409  | rs571173399 | rs57214150  |
| rs563807740 | rs56408528  | rs566529    | rs56782495  | rs56881024  | rs569911    | rs57119673  | rs57214277  |
| rs56380902  | rs56409854  | rs566530    | rs56783829  | rs56883673  | rs56994090  | rs571208715 | rs572169    |
| rs56381832  | rs56410424  | rs56654623  | rs56784950  | rs568868093 | rs56995152  | rs57122392  | rs572182531 |
| rs56382357  | rs56410689  | rs566549206 | rs567876843 | rs56887639  | rs56996825  | rs57123607  | rs572186767 |
| rs56382918  | rs56411048  | rs566571310 | rs567880204 | rs56889301  | rs56998314  | rs57126710  | rs57221529  |
| rs56383105  | rs56411466  | rs566629828 | rs567885099 | rs56890592  | rs570013781 | rs57128498  | rs57222984  |
| rs56383622  | rs56411893  | rs56666294  | rs56791590  | rs568925773 | rs57007317  | rs571287458 | rs572243775 |
| rs56383986  | rs564190295 | rs566673    | rs56793596  | rs568938    | rs570074023 | rs57129396  | rs572250570 |
| rs56383987  | rs564244632 | rs56668103  | rs567940591 | rs568986330 | rs570074821 | rs571312    | rs57228624  |
| rs56384862  | rs564309    | rs56671953  | rs56794817  | rs56898654  | rs57008984  | rs571318149 | rs57228804  |
| rs56385951  | rs564310304 | rs56673456  | rs567958    | rs56898944  | rs570124667 | rs57131976  | rs572337598 |
| rs56386186  | rs564343    | rs56673861  | rs56796226  | rs568998724 | rs57016874  | rs571356    | rs57235767  |
| rs56386507  | rs564377207 | rs566752434 | rs56799554  | rs569022307 | rs570223913 | rs57136797  | rs572361305 |
| rs56387295  | rs564403008 | rs566752820 | rs568020    | rs56902258  | rs570238285 | rs571384891 | rs57236717  |
| rs563875    | rs564427867 | rs566764177 | rs56803094  | rs56902655  | rs57024841  | rs57139556  | rs57236847  |
| rs56387622  | rs564473618 | rs56676529  | rs568036    | rs569036944 | rs57026767  | rs57141546  | rs572381265 |
| rs56387835  | rs564512580 | rs566773279 | rs568039055 | rs56903760  | rs57032711  | rs57141708  | rs57242328  |
| rs56388170  | rs564567    | rs566791419 | rs56803995  | rs569086022 | rs570387    | rs57142672  | rs57244888  |
| rs56388355  | rs564626594 | rs56681946  | rs568052023 | rs569117290 | rs570399    | rs57143961  | rs57246240  |
| rs56388530  | rs564636753 | rs566822643 | rs56805921  | rs56912861  | rs57040304  | rs57145876  | rs57246313  |
| rs56389497  | rs564653325 | rs56682471  | rs56807175  | rs56915796  | rs57043009  | rs571461910 | rs572474    |
| rs56389811  | rs564681262 | rs566858049 | rs56810541  | rs56919232  | rs570436    | rs571463591 | rs572474770 |
| rs56390363  | rs564789596 | rs56686215  | rs568110    | rs569207    | rs57044214  | rs57148205  | rs572476245 |
| rs56390486  | rs564799    | rs566865466 | rs568125826 | rs569209    | rs570442571 | rs571484036 | rs57251748  |
| rs56390833  | rs564819152 | rs566867381 | rs56813533  | rs56921221  | rs57045420  | rs57149692  | rs572535663 |
| rs56391074  | rs564864539 | rs56687477  | rs568141201 | rs569214    | rs57049475  | rs571497    | rs57253908  |
| rs56391344  | rs564889095 | rs566921175 | rs56817615  | rs56921855  | rs570524    | rs57153235  | rs572568967 |
| rs56391951  | rs564914    | rs566921725 | rs56818621  | rs569231401 | rs570530    | rs57153895  | rs572578302 |
| rs56392308  | rs564930    | rs56692845  | rs56818816  | rs56923574  | rs570618    | rs571542291 | rs57259994  |
| rs56392746  | rs564932183 | rs566952760 | rs568197028 | rs56923832  | rs57062879  | rs571547192 | rs57263785  |
| rs56393506  | rs564968560 | rs566987463 | rs568201365 | rs569258685 | rs570636990 | rs57155492  | rs572643200 |
| rs56393977  | rs564976    | rs56699372  | rs56821385  | rs56928337  | rs570639864 | rs571567    | rs57265257  |
| rs56394279  | rs564979    | rs567003    | rs56823429  | rs56935123  | rs57067187  | rs57158761  | rs57267144  |
| rs56394994  | rs565021665 | rs56702977  | rs568240689 | rs56937648  | rs570688891 | rs57159061  | rs57268633  |
| rs56395295  | rs565050730 | rs56702993  | rs568250334 | rs56940353  | rs57070010  | rs571613770 | rs572740451 |
| rs563954    | rs565102642 | rs567056    | rs568261561 | rs569405229 | rs57070985  | rs571618690 | rs57274573  |
| rs56395424  | rs565236700 | rs567058829 | rs56826596  | rs56940811  | rs57071336  | rs57163768  | rs572756998 |
| rs56395531  | rs565277381 | rs567068501 | rs568303215 | rs56942085  | rs570714594 | rs571639369 | rs57276302  |
| rs56396408  | rs565335773 | rs567092099 | rs568311635 | rs569421885 | rs570730    | rs571643813 | rs572797    |
| rs56397034  | rs565348    | rs567185    | rs568317811 | rs569429508 | rs57074291  | rs571658566 | rs57281063  |
| rs56397640  | rs565366829 | rs56722963  | rs56837868  | rs569453    | rs57075379  | rs57166795  | rs57286125  |
| rs56397996  | rs565408205 | rs567230078 | rs568396270 | rs569460    | rs570762793 | rs571690420 | rs572907029 |
| rs56398195  | rs565444861 | rs567247008 | rs56841534  | rs56950313  | rs570790548 | rs57170789  | rs57292959  |
| rs56398417  | rs565471584 | rs567292015 | rs568442    | rs569511    | rs57079115  | rs571755931 | rs572954335 |
| rs56398830  | rs565478760 | rs56731455  | rs56844452  | rs569511541 | rs570794153 | rs57176252  | rs57296505  |
| rs56399423  | rs565497590 | rs567318996 | rs56848936  | rs56952027  | rs57079996  | rs57176772  | rs57299708  |
| rs563995    | rs565611618 | rs567333455 | rs56850090  | rs56953221  | rs57081355  | rs571781683 | rs57301765  |
| rs56399737  | rs565653815 | rs567339168 | rs56852527  | rs569550    | rs57083693  | rs57179003  | rs573022400 |
| rs56399780  | rs565720    | rs56734909  | rs568532609 | rs569557    | rs57085915  | rs57180764  | rs573037260 |
| rs56401299  | rs565728    | rs56735597  | rs56853305  | rs56959712  | rs570885979 | rs571835655 | rs57306227  |
| rs56401446  | rs565728741 | rs56740597  | rs568551048 | rs569598265 | rs57091121  | rs571841    | rs57307148  |
| rs56401617  | rs56579340  | rs567415847 | rs56858768  | rs56960368  | rs570942    | rs571848809 | rs57307701  |
| rs56401710  | rs565817433 | rs567474855 | rs568599    | rs56960668  | rs570984510 | rs571893049 | rs573098    |
| rs56401801  | rs565853247 | rs567477027 | rs568613    | rs569620730 | rs57098456  | rs57190680  | rs573113970 |

|             |             |             |             |             |             |             |             |
|-------------|-------------|-------------|-------------|-------------|-------------|-------------|-------------|
| rs57314044  | rs57414300  | rs574686237 | rs5752774   | rs5756482   | rs5759067   | rs5763821   | rs57723803  |
| rs57314245  | rs57414412  | rs5747006   | rs5752776   | rs5756485   | rs5759080   | rs5763825   | rs577267998 |
| rs573155514 | rs574174001 | rs5747308   | rs5752792   | rs5756487   | rs5759088   | rs576416681 | rs577272    |
| rs573158838 | rs574183    | rs5747315   | rs5752866   | rs5756489   | rs57591036  | rs57642905  | rs5772984   |
| rs573195    | rs5742007   | rs5747327   | rs5752882   | rs5756491   | rs57591247  | rs57649467  | rs5773126   |
| rs57323441  | rs574237    | rs574753165 | rs57529360  | rs57565032  | rs5759167   | rs576508114 | rs57731447  |
| rs573246    | rs5742643   | rs57481061  | rs57529409  | rs5756504   | rs57592410  | rs5765229   | rs57732760  |
| rs57327054  | rs5742692   | rs574820692 | rs5752973   | rs5756505   | rs57592469  | rs57652769  | rs57734857  |
| rs57328376  | rs57427081  | rs5748404   | rs5752989   | rs5756506   | rs57594838  | rs57654288  | rs57736976  |
| rs573335    | rs5742904   | rs57486725  | rs57530364  | rs5756519   | rs5760054   | rs57654548  | rs57737646  |
| rs573377651 | rs5742913   | rs57488047  | rs5753037   | rs5756520   | rs5760061   | rs5765524   | rs577381332 |
| rs573380326 | rs5742915   | rs5748926   | rs5753043   | rs5756529   | rs576009056 | rs5765717   | rs577420328 |
| rs57338137  | rs5742933   | rs5749032   | rs5753103   | rs57567837  | rs5760092   | rs576573069 | rs57742792  |
| rs573383551 | rs5743289   | rs5749082   | rs5753111   | rs5756805   | rs5760096   | rs576579    | rs57743625  |
| rs573396813 | rs5743293   | rs5749111   | rs575322    | rs5756813   | rs5760120   | rs576603    | rs577442473 |
| rs57339844  | rs57434655  | rs5749330   | rs5753231   | rs5756825   | rs5760147   | rs57661533  | rs57748895  |
| rs57340203  | rs5743511   | rs5749446   | rs575334    | rs5756894   | rs57601949  | rs576651896 | rs577525    |
| rs573421908 | rs57435966  | rs5749482   | rs5753363   | rs5756931   | rs5760293   | rs5766565   | rs57753335  |
| rs573431210 | rs5743597   | rs5749502   | rs57534651  | rs575705078 | rs5760378   | rs5766576   | rs5775440   |
| rs573432473 | rs5743604   | rs5749697   | rs57535397  | rs5757126   | rs5760425   | rs5766582   | rs57754494  |
| rs57344483  | rs5743618   | rs574977616 | rs5753566   | rs5757133   | rs5760444   | rs5766584   | rs5775584   |
| rs573454216 | rs574367    | rs574992951 | rs575377383 | rs5757222   | rs576062    | rs576660328 | rs577584690 |
| rs573455    | rs57437407  | rs57501596  | rs575403075 | rs5757282   | rs576076    | rs5766632   | rs577660579 |
| rs57346805  | rs57438482  | rs5750184   | rs575404063 | rs5757394   | rs576083050 | rs576668364 | rs57767539  |
| rs57347370  | rs5743890   | rs57502260  | rs5754100   | rs57574422  | rs576111261 | rs5766674   | rs577676    |
| rs573485512 | rs5743894   | rs5750254   | rs5754102   | rs5757584   | rs57611503  | rs576674585 | rs5776993   |
| rs57348955  | rs57440165  | rs575027    | rs5754104   | rs5757602   | rs576124561 | rs576679    | rs577721086 |
| rs57349798  | rs5744168   | rs5750339   | rs5754109   | rs57576544  | rs576132061 | rs57668028  | rs577734383 |
| rs57349855  | rs5744249   | rs5750482   | rs5754111   | rs5757673   | rs57613913  | rs57667109  | rs57779429  |
| rs5735      | rs5744250   | rs5750494   | rs57541197  | rs5757675   | rs57614870  | rs576750965 | rs57779751  |
| rs573521    | rs574440893 | rs5750561   | rs5754120   | rs5757717   | rs57615517  | rs57675369  | rs57783949  |
| rs57352738  | rs5744632   | rs57506017  | rs575416182 | rs5757730   | rs576166    | rs57679537  | rs57785453  |
| rs573536922 | rs5744672   | rs5750643   | rs5754166   | rs5757736   | rs5761793   | rs5767976   | rs5778564   |
| rs573552880 | rs5744680   | rs5750644   | rs57541735  | rs5757748   | rs57618695  | rs57680473  | rs57786342  |
| rs573582724 | rs57448815  | rs5750669   | rs5754198   | rs5757773   | rs576195416 | rs576818999 | rs57788691  |
| rs57359101  | rs574503830 | rs5750671   | rs5754217   | rs57578064  | rs576198199 | rs57684439  | rs577887768 |
| rs57360718  | rs574506011 | rs5750673   | rs5754221   | rs575784488 | rs576236    | rs576859    | rs5778914   |
| rs573617232 | rs5745297   | rs5750691   | rs5754227   | rs5757906   | rs576242124 | rs5768709   | rs5779036   |
| rs573620537 | rs57453217  | rs5750823   | rs5754249   | rs5757946   | rs576247    | rs576872277 | rs57791671  |
| rs573635749 | rs57453590  | rs5750828   | rs5754266   | rs5757973   | rs57624819  | rs57688553  | rs5779197   |
| rs573680085 | rs57453899  | rs5750829   | rs5754283   | rs5758128   | rs5762532   | rs576886612 | rs577924    |
| rs573682388 | rs57454229  | rs5750830   | rs57542984  | rs5758209   | rs5762534   | rs576901188 | rs57792760  |
| rs57368286  | rs574542723 | rs5750847   | rs5754344   | rs5758223   | rs5762746   | rs57690685  | rs577932181 |
| rs573683582 | rs574551002 | rs5750853   | rs5754387   | rs5758265   | rs5762752   | rs576907609 | rs57796453  |
| rs573688    | rs5745568   | rs5750968   | rs5754422   | rs5758268   | rs5762768   | rs57692580  | rs57796856  |
| rs573716401 | rs5745582   | rs5751039   | rs5754445   | rs5758274   | rs5762813   | rs57696383  | rs577997457 |
| rs573778305 | rs5745587   | rs5751061   | rs5754467   | rs5758297   | rs5762862   | rs5769707   | rs57800857  |
| rs57380532  | rs5745687   | rs5751077   | rs5754581   | rs5758311   | rs5762879   | rs576982    | rs5780192   |
| rs57380671  | rs5745695   | rs5751086   | rs57545942  | rs5758324   | rs57629029  | rs57700751  | rs57802047  |
| rs57382675  | rs57457691  | rs575113    | rs5754712   | rs5758343   | rs5762925   | rs57700771  | rs578067251 |
| rs573833    | rs574583    | rs57511663  | rs5754738   | rs57583458  | rs5763079   | rs57707166  | rs578092393 |
| rs57383920  | rs5746017   | rs5751191   | rs5754753   | rs5758364   | rs5763096   | rs5770794   | rs57809726  |
| rs573841223 | rs5746026   | rs57512118  | rs5754762   | rs575840515 | rs57631352  | rs5770820   | rs57810758  |
| rs57384528  | rs574615332 | rs5751229   | rs575505283 | rs57585211  | rs57633152  | rs5770908   | rs5781117   |
| rs573872    | rs5746193   | rs5751348   | rs57550938  | rs57585717  | rs57633475  | rs577095215 | rs578113254 |
| rs57390839  | rs57462170  | rs575138    | rs57556178  | rs5758605   | rs57633992  | rs57709857  | rs5781151   |
| rs57391541  | rs574622007 | rs57514363  | rs5755799   | rs57586289  | rs57634090  | rs577104594 | rs57812022  |
| rs57392722  | rs574622475 | rs575146    | rs5755943   | rs5758651   | rs576345045 | rs5771069   | rs57812361  |
| rs573930512 | rs574645080 | rs57514868  | rs575596509 | rs575866787 | rs5763555   | rs5771118   | rs57812663  |
| rs57396456  | rs5746451   | rs5751901   | rs5756052   | rs5758884   | rs57636386  | rs5771206   | rs57813069  |
| rs573988888 | rs5746495   | rs5751902   | rs5756080   | rs5758888   | rs5763646   | rs57713596  | rs57814325  |
| rs57400569  | rs574661    | rs5751909   | rs57561198  | rs5758891   | rs5763662   | rs57714592  | rs5781651   |
| rs57401290  | rs57466243  | rs575193565 | rs57561676  | rs5758896   | rs576376    | rs57716069  | rs578174    |
| rs57402213  | rs5746638   | rs5752360   | rs575631    | rs5758999   | rs5763767   | rs577185477 | rs57819080  |
| rs574055998 | rs57467915  | rs5752598   | rs5756391   | rs57590313  | rs5763779   | rs5772      | rs57819604  |
| rs574056    | rs5746816   | rs5752754   | rs5756405   | rs57590327  | rs5763790   | rs577217250 | rs57825321  |
| rs574087    | rs57468227  | rs5752773   | rs5756414   | rs5759054   | rs5763800   | rs577236702 | rs57826934  |

|            |            |            |            |            |            |             |            |
|------------|------------|------------|------------|------------|------------|-------------|------------|
| rs57827007 | rs57954239 | rs58097944 | rs58221872 | rs583593   | rs58475265 | rs58658771  | rs58785573 |
| rs57828851 | rs5795634  | rs5810015  | rs58223193 | rs58359565 | rs584768   | rs58662928  | rs58785784 |
| rs57829920 | rs57957974 | rs58101275 | rs5822760  | rs5835988  | rs58477215 | rs58667319  | rs58787138 |
| rs57831591 | rs57960590 | rs58104186 | rs582297   | rs583609   | rs58477839 | rs586699    | rs58788673 |
| rs578347   | rs57960857 | rs5810626  | rs58235267 | rs58360980 | rs5848     | rs586701    | rs58788809 |
| rs57834782 | rs57962177 | rs58106596 | rs58235352 | rs583635   | rs584828   | rs58670779  | rs5879021  |
| rs5783545  | rs579682   | rs58107686 | rs58237393 | rs58365266 | rs58487339 | rs5867818   | rs58791712 |
| rs57837628 | rs57968458 | rs581080   | rs582384   | rs58365910 | rs58489616 | rs5868014   | rs5879422  |
| rs57838764 | rs579728   | rs5811081  | rs58240276 | rs58368959 | rs58489806 | rs5868087   | rs5880     |
| rs57839742 | rs57976196 | rs58112824 | rs58243949 | rs58370486 | rs58494653 | rs58681483  | rs5880046  |
| rs57843631 | rs57977991 | rs58116674 | rs58244401 | rs5837155  | rs584961   | rs586874    | rs5880172  |
| rs5784601  | rs5798300  | rs58117425 | rs58249351 | rs58376408 | rs58499557 | rs58688157  | rs5880242  |
| rs5784657  | rs57985356 | rs58117563 | rs58250641 | rs583769   | rs5850     | rs586936    | rs588061   |
| rs5784945  | rs57988484 | rs58119220 | rs5825114  | rs58383597 | rs58500374 | rs58694847  | rs58806801 |
| rs5785510  | rs57989199 | rs58120505 | rs58253018 | rs58383713 | rs58502974 | rs58695218  | rs58807574 |
| rs5785580  | rs57989216 | rs58120907 | rs582537   | rs58383894 | rs58503347 | rs58696100  | rs5880893  |
| rs57856222 | rs57989581 | rs58122955 | rs58257470 | rs5838506  | rs58507040 | rs58696617  | rs58811733 |
| rs57858280 | rs57989773 | rs58123204 | rs58262369 | rs58389158 | rs5851138  | rs587080    | rs5881307  |
| rs5785903  | rs57994353 | rs5812534  | rs58267004 | rs5839154  | rs585168   | rs5870855   | rs588136   |
| rs5785906  | rs57994514 | rs5812700  | rs58270597 | rs58394161 | rs58521088 | rs587118    | rs58814158 |
| rs578595   | rs57996771 | rs58127077 | rs58270997 | rs5839764  | rs58521262 | rs58713975  | rs58814925 |
| rs57862683 | rs5799921  | rs5813093  | rs58271251 | rs5839768  | rs5852196  | rs58714937  | rs58817659 |
| rs57865802 | rs57999214 | rs581320   | rs582714   | rs58397787 | rs58524310 | rs5871739   | rs588177   |
| rs57866767 | rs57999988 | rs5813220  | rs5827281  | rs5839925  | rs58528939 | rs58721818  | rs588206   |
| rs57869623 | rs58000832 | rs58133635 | rs58272892 | rs584001   | rs58530613 | rs58722170  | rs58823914 |
| rs57874285 | rs58005484 | rs5813399  | rs5827412  | rs58400555 | rs58542926 | rs58722186  | rs58826447 |
| rs578763   | rs580063   | rs5813668  | rs582757   | rs584007   | rs58548501 | rs58723250  | rs5883     |
| rs5787948  | rs58007470 | rs58139454 | rs58279426 | rs58400863 | rs58550282 | rs5872391   | rs5883070  |
| rs57880964 | rs58011745 | rs581400   | rs58280444 | rs584025   | rs585510   | rs587242    | rs5883154  |
| rs57882451 | rs5801512  | rs581411   | rs5828081  | rs58408429 | rs5855544  | rs587259    | rs58831567 |
| rs57884925 | rs58015370 | rs58141407 | rs58283628 | rs584096   | rs585557   | rs58727484  | rs588321   |
| rs57891859 | rs58016561 | rs5814288  | rs58287327 | rs5841107  | rs58558667 | rs587289    | rs58833541 |
| rs5789271  | rs58018068 | rs58143210 | rs58287690 | rs58413676 | rs58560561 | rs58729412  | rs58833930 |
| rs5789783  | rs58022575 | rs58144239 | rs58294838 | rs58415480 | rs58568091 | rs58730668  | rs5883629  |
| rs5790063  | rs58029167 | rs58146172 | rs58296637 | rs58416206 | rs585736   | rs5873567   | rs58839393 |
| rs57901555 | rs58029241 | rs581465   | rs5829676  | rs58418838 | rs58574366 | rs587364    | rs58842463 |
| rs579017   | rs58030288 | rs58148580 | rs58296998 | rs58419446 | rs58574691 | rs5873661   | rs58842569 |
| rs57902545 | rs5803322  | rs58152544 | rs58298943 | rs58419810 | rs58577564 | rs58742730  | rs58843120 |
| rs5790666  | rs58033671 | rs5816513  | rs583077   | rs58426008 | rs58582466 | rs58743367  | rs58847541 |
| rs57908212 | rs5803487  | rs58166386 | rs583104   | rs58429174 | rs58590331 | rs5874421   | rs58847685 |
| rs5791099  | rs58038334 | rs58167401 | rs58310495 | rs58430496 | rs58593843 | rs5874487   | rs58854324 |
| rs57912727 | rs58038553 | rs581694   | rs58310839 | rs58431213 | rs585967   | rs58744877  | rs58854468 |
| rs57913635 | rs5804584  | rs5817082  | rs58312042 | rs58432198 | rs58600253 | rs58745116  | rs58859557 |
| rs5791797  | rs58055674 | rs58174579 | rs5831579  | rs58432776 | rs5860048  | rs58746316  | rs5886095  |
| rs57918684 | rs58056804 | rs58175144 | rs5831600  | rs58434384 | rs58604758 | rs58749137  | rs58862095 |
| rs57920447 | rs58057291 | rs58177382 | rs58317633 | rs584368   | rs58605236 | rs58749629  | rs58862611 |
| rs5792186  | rs58058861 | rs58184964 | rs5831841  | rs58437978 | rs5860563  | rs5875247   | rs588641   |
| rs5792235  | rs58065122 | rs58185614 | rs5831974  | rs5843947  | rs5860730  | rs5875313   | rs58865823 |
| rs5792239  | rs580652   | rs58186411 | rs58321169 | rs58441332 | rs58611096 | rs5875374   | rs5886709  |
| rs57922873 | rs58066158 | rs58190593 | rs58324296 | rs584425   | rs58612760 | rs58754091  | rs588682   |
| rs5792377  | rs58066679 | rs5819600  | rs583269   | rs584438   | rs58612872 | rs5875463   | rs58869521 |
| rs5792449  | rs58068637 | rs58196315 | rs58327496 | rs5844547  | rs586178   | rs5875851   | rs588709   |
| rs57924812 | rs58072681 | rs5819674  | rs58329075 | rs58446129 | rs58618031 | rs5875893   | rs58874647 |
| rs579249   | rs58073039 | rs58198139 | rs5832950  | rs584480   | rs58621819 | rs5875909   | rs58876439 |
| rs57926455 | rs58073046 | rs5819849  | rs58329848 | rs5844832  | rs58622005 | rs5876027   | rs5887674  |
| rs57927100 | rs58074950 | rs5820258  | rs5833013  | rs58452280 | rs58625759 | rs587611953 | rs58879558 |
| rs57928712 | rs580809   | rs5820482  | rs583306   | rs5845323  | rs58629129 | rs587620705 | rs5888     |
| rs57938373 | rs58083390 | rs58204830 | rs58331610 | rs58453446 | rs5863049  | rs58764043  | rs58882293 |
| rs57939424 | rs58084604 | rs5820605  | rs58332211 | rs5845353  | rs586339   | rs587668346 | rs58889466 |
| rs57942103 | rs5808566  | rs58206417 | rs5833486  | rs584564   | rs586346   | rs587670082 | rs58895965 |
| rs5794578  | rs58087925 | rs58209041 | rs58336065 | rs58461606 | rs58646822 | rs5877      | rs5890117  |
| rs579459   | rs58088508 | rs582094   | rs58342051 | rs58466006 | rs58649169 | rs58770366  | rs589030   |
| rs57946797 | rs58089049 | rs58211977 | rs5835068  | rs5846851  | rs58649746 | rs587707823 | rs58904263 |
| rs5794844  | rs5808964  | rs58212910 | rs5835174  | rs58470117 | rs5865     | rs587729126 | rs58906513 |
| rs5794958  | rs5808965  | rs58213422 | rs5835176  | rs58470318 | rs586511   | rs587730493 | rs589092   |
| rs57952229 | rs58090211 | rs5821446  | rs58351927 | rs58470346 | rs58653258 | rs587739738 | rs5891232  |
| rs57954211 | rs58095595 | rs5822105  | rs58356259 | rs58473820 | rs586533   | rs58779949  | rs589135   |

|            |            |            |            |            |            |            |            |
|------------|------------|------------|------------|------------|------------|------------|------------|
| rs5891768  | rs5906709  | rs59212267 | rs59366013 | rs59521405 | rs59652089 | rs59779556 | rs5993499  |
| rs58921703 | rs59068084 | rs59214248 | rs59367532 | rs59521811 | rs59654817 | rs597808   | rs59937473 |
| rs589249   | rs59072058 | rs59218457 | rs5937157  | rs5952223  | rs59655222 | rs59781045 | rs5994176  |
| rs58926146 | rs59072247 | rs5922229  | rs59373415 | rs5952279  | rs5965561  | rs5978985  | rs59944054 |
| rs58926603 | rs59072263 | rs5922761  | rs593742   | rs5952416  | rs596594   | rs59791349 | rs5994479  |
| rs58927807 | rs59072704 | rs59227842 | rs59374417 | rs595244   | rs59660079 | rs59797241 | rs5994578  |
| rs5892942  | rs59073566 | rs5922858  | rs5937507  | rs5952553  | rs59661306 | rs5980369  | rs59950280 |
| rs58933240 | rs59075594 | rs5922945  | rs593767   | rs59527464 | rs59663815 | rs598046   | rs59951000 |
| rs58936256 | rs59081368 | rs592333   | rs59379014 | rs595290   | rs59667935 | rs5980712  | rs5995288  |
| rs5893860  | rs590820   | rs592373   | rs59381142 | rs59532114 | rs59668095 | rs5980809  | rs5995385  |
| rs58942008 | rs59084784 | rs592423   | rs59382200 | rs5953283  | rs5966882  | rs59813324 | rs599550   |
| rs589428   | rs59085061 | rs592483   | rs5938929  | rs59536295 | rs59669681 | rs59813731 | rs5995756  |
| rs589446   | rs590856   | rs59252007 | rs59395276 | rs59537158 | rs59669989 | rs59825600 | rs5995757  |
| rs589448   | rs59086897 | rs59254404 | rs59397130 | rs59543286 | rs59673987 | rs59827721 | rs5995875  |
| rs58953077 | rs59104589 | rs59255055 | rs59397548 | rs5954596  | rs596773   | rs59828823 | rs5995881  |
| rs5895733  | rs59107033 | rs59262126 | rs59399491 | rs59549421 | rs59679367 | rs59837038 | rs5995992  |
| rs58958361 | rs59107435 | rs59263024 | rs59402905 | rs59554899 | rs59682205 | rs59843584 | rs5996631  |
| rs5896     | rs59111563 | rs592656   | rs594039   | rs595551   | rs59682551 | rs59844455 | rs5996665  |
| rs5896088  | rs591118   | rs59271985 | rs5941160  | rs5955543  | rs59683676 | rs5985     | rs599673   |
| rs58964929 | rs591120   | rs59277927 | rs59412811 | rs5955867  | rs59692040 | rs59851826 | rs59967356 |
| rs58965232 | rs591143   | rs592785   | rs59414721 | rs595655   | rs59697075 | rs59852339 | rs59968909 |
| rs58966835 | rs591166   | rs59283948 | rs594153   | rs59571284 | rs5969745  | rs5985471  | rs5996945  |
| rs58967320 | rs59123177 | rs59285107 | rs59420943 | rs5957354  | rs59698324 | rs598561   | rs59970005 |
| rs58969255 | rs59123361 | rs59285639 | rs59424629 | rs59574136 | rs5970021  | rs59865663 | rs599707   |
| rs5896952  | rs5912570  | rs5929166  | rs5942618  | rs59576023 | rs597021   | rs59867004 | rs59972560 |
| rs5896958  | rs5912838  | rs59294613 | rs59428052 | rs595767   | rs5970442  | rs59867199 | rs5997397  |
| rs58972372 | rs59129883 | rs5930     | rs594284   | rs59578880 | rs597045   | rs59867819 | rs59974236 |
| rs58973023 | rs591323   | rs59300999 | rs59428852 | rs59580628 | rs59708846 | rs59868192 | rs5997460  |
| rs58978565 | rs59133824 | rs59302296 | rs5942937  | rs59581968 | rs59708873 | rs598682   | rs5997510  |
| rs58979150 | rs5913634  | rs59302410 | rs5942956  | rs59586387 | rs59712011 | rs5986948  | rs5997534  |
| rs5898146  | rs59137082 | rs59304342 | rs5942965  | rs59586681 | rs59712316 | rs5987027  | rs5997842  |
| rs58981560 | rs5913997  | rs59306092 | rs59430313 | rs595872   | rs59714050 | rs5987107  | rs5997898  |
| rs58984824 | rs5914035  | rs59308963 | rs59431963 | rs59592823 | rs59716545 | rs5987194  | rs5997900  |
| rs58987334 | rs5914101  | rs59310453 | rs5943630  | rs59593577 | rs597167   | rs5987245  | rs5997938  |
| rs58989813 | rs59142272 | rs59311588 | rs59440261 | rs59596477 | rs597205   | rs59874990 | rs5997969  |
| rs5899     | rs59142330 | rs59314616 | rs59443763 | rs59597511 | rs59721556 | rs5987510  | rs5997982  |
| rs58992912 | rs5914340  | rs59316512 | rs5944476  | rs595982   | rs59721702 | rs59876823 | rs59979824 |
| rs589942   | rs59145927 | rs59317344 | rs59450344 | rs5960233  | rs59723374 | rs59878318 | rs59980837 |
| rs58996896 | rs59148743 | rs593179   | rs5945174  | rs59606152 | rs59724122 | rs59882870 | rs599839   |
| rs5899787  | rs5914892  | rs59322    | rs5945324  | rs5960873  | rs59731356 | rs59883166 | rs5998509  |
| rs590013   | rs59150958 | rs59325236 | rs5945326  | rs59611499 | rs597319   | rs59884963 | rs59985166 |
| rs590041   | rs5915287  | rs5932715  | rs5945423  | rs59614433 | rs59732267 | rs59885016 | rs5998517  |
| rs59007384 | rs59156997 | rs59327154 | rs59454355 | rs59614505 | rs597325   | rs5989004  | rs59985551 |
| rs590097   | rs59159185 | rs59328596 | rs59455052 | rs59614634 | rs59733471 | rs59892895 | rs5998599  |
| rs590121   | rs591668   | rs5932886  | rs5945572  | rs59616136 | rs59735493 | rs59893503 | rs59986178 |
| rs59020521 | rs59167614 | rs5933080  | rs5945619  | rs596169   | rs59737081 | rs59893724 | rs5998619  |
| rs59020573 | rs59168178 | rs59333122 | rs59457020 | rs59617050 | rs59737437 | rs598952   | rs59986227 |
| rs59022814 | rs5917     | rs59333573 | rs594585   | rs59621822 | rs59738387 | rs59895994 | rs599881   |
| rs59029981 | rs5918077  | rs5933688  | rs594597   | rs5962597  | rs59739601 | rs5989600  | rs599892   |
| rs59032073 | rs59180873 | rs59337986 | rs59466457 | rs59626274 | rs59739823 | rs59896920 | rs600011   |
| rs59035991 | rs5918137  | rs59341143 | rs59473955 | rs59626664 | rs5974155  | rs59898460 | rs6000329  |
| rs59038405 | rs59183580 | rs59343228 | rs59476292 | rs59631876 | rs59741822 | rs59899220 | rs600038   |
| rs59042687 | rs59185885 | rs5934328  | rs59477460 | rs5963214  | rs59744851 | rs59900779 | rs6000550  |
| rs59043219 | rs59186511 | rs5934505  | rs59480703 | rs59633341 | rs597462   | rs59901009 | rs6000553  |
| rs59043281 | rs59187049 | rs5934507  | rs594821   | rs5963711  | rs597503   | rs59903549 | rs60005573 |
| rs5904818  | rs59189695 | rs59345329 | rs59482735 | rs5963774  | rs59752258 | rs59906301 | rs60005721 |
| rs59050332 | rs59191668 | rs5934683  | rs59484402 | rs59638240 | rs5975438  | rs59909582 | rs6000759  |
| rs5905042  | rs591939   | rs59347135 | rs59489841 | rs59642354 | rs59760856 | rs599134   | rs6000762  |
| rs59051938 | rs5919427  | rs59350108 | rs59491086 | rs59642482 | rs59765118 | rs59916403 | rs6000889  |
| rs5905716  | rs5919432  | rs59352354 | rs5949232  | rs59643265 | rs5977194  | rs59917308 | rs6000890  |
| rs59059615 | rs59194935 | rs59357103 | rs59499156 | rs59643483 | rs59772657 | rs59918340 | rs6000897  |
| rs59060240 | rs591988   | rs5935876  | rs59499656 | rs5964484  | rs59772922 | rs5992106  | rs6001190  |
| rs5906242  | rs59199978 | rs59359598 | rs59500178 | rs59646751 | rs59773154 | rs59921208 | rs6001193  |
| rs5906256  | rs59203590 | rs59360790 | rs59502288 | rs59649211 | rs59774409 | rs59922977 | rs6001199  |
| rs59063082 | rs592037   | rs5936487  | rs595035   | rs596501   | rs59776826 | rs59925771 | rs60015123 |
| rs5906426  | rs59208569 | rs5936526  | rs59508494 | rs5965019  | rs59776887 | rs5992957  | rs6001619  |
| rs5906672  | rs59211589 | rs59365541 | rs595158   | rs5965085  | rs59779307 | rs59932381 | rs60016321 |

|             |            |            |            |            |            |            |            |
|-------------|------------|------------|------------|------------|------------|------------|------------|
| rs60018147  | rs6009583  | rs6016534  | rs6022859  | rs6029626  | rs60388273 | rs6047703  | rs60576102 |
| rs6001817   | rs60095957 | rs6016547  | rs6023383  | rs6029640  | rs603901   | rs6047716  | rs6057612  |
| rs6001831   | rs60096640 | rs601676   | rs6023560  | rs6030     | rs6039211  | rs604781   | rs605765   |
| rs6001834   | rs6009946  | rs6017001  | rs6023633  | rs6030369  | rs6039216  | rs6047844  | rs605783   |
| rs6001864   | rs6010042  | rs6017247  | rs6023649  | rs603061   | rs6039251  | rs6047901  | rs6058067  |
| rs6001872   | rs6010044  | rs6017249  | rs60237566 | rs6030712  | rs60393230 | rs6048     | rs6058078  |
| rs6001930   | rs6010205  | rs6017281  | rs6023897  | rs60307791 | rs6039642  | rs6048205  | rs6058093  |
| rs6001939   | rs6010620  | rs6017317  | rs6023939  | rs6030803  | rs603965   | rs6048216  | rs60580948 |
| rs6001960   | rs6010651  | rs6017342  | rs60239918 | rs6030816  | rs6040006  | rs60485593 | rs60580992 |
| rs6001982   | rs601081   | rs6017427  | rs60240315 | rs6030819  | rs6040063  | rs6049003  | rs6058181  |
| rs60023081  | rs60109456 | rs6017460  | rs60242841 | rs6030992  | rs6040068  | rs60493905 | rs6058227  |
| rs6002333   | rs60109929 | rs6017475  | rs602444   | rs6031036  | rs6040076  | rs60497719 | rs6058303  |
| rs6002386   | rs6011033  | rs60175411 | rs6024459  | rs60312147 | rs6040079  | rs6050     | rs60583266 |
| rs6002655   | rs6011040  | rs6017591  | rs60244988 | rs6031288  | rs6040116  | rs6050091  | rs6058423  |
| rs6002676   | rs6011155  | rs6017713  | rs6024836  | rs6031303  | rs6040283  | rs6050123  | rs6058523  |
| rs6002930   | rs60111777 | rs6017776  | rs6024846  | rs6031307  | rs6040286  | rs6050127  | rs6058613  |
| rs60029395  | rs6011208  | rs60178806 | rs60249166 | rs6031311  | rs6040356  | rs6050333  | rs60586550 |
| rs6002946   | rs6011229  | rs60179514 | rs6025     | rs603140   | rs60403635 | rs6050427  | rs6058684  |
| rs6003      | rs6011278  | rs60180747 | rs602512   | rs6031431  | rs60405594 | rs6050446  | rs60587303 |
| rs60032274  | rs60113019 | rs6018099  | rs60251368 | rs6031435  | rs60409141 | rs6050463  | rs6058750  |
| rs600324    | rs60117481 | rs60181494 | rs6025157  | rs6031444  | rs6041     | rs6050464  | rs6058782  |
| rs6003387   | rs6011779  | rs6018151  | rs6025176  | rs6031598  | rs604126   | rs60505450 | rs6058796  |
| rs6003389   | rs6012052  | rs6018158  | rs602543   | rs60317590 | rs604149   | rs60505738 | rs6058869  |
| rs6003456   | rs6012059  | rs6018424  | rs6025505  | rs6031849  | rs60415085 | rs605066   | rs6058874  |
| rs60037937  | rs60125383 | rs6018432  | rs60255247 | rs6031966  | rs60417486 | rs6051320  | rs60588889 |
| rs6003958   | rs6012542  | rs6018728  | rs6025590  | rs6032067  | rs604183   | rs60515336 | rs60589532 |
| rs6004031   | rs6012558  | rs60188314 | rs6025606  | rs60325252 | rs6041981  | rs60515486 | rs6059412  |
| rs6004124   | rs6012953  | rs60189618 | rs60257661 | rs60325490 | rs60421434 | rs6051836  | rs60594510 |
| rs6004193   | rs60129850 | rs60191654 | rs60262711 | rs60325980 | rs6042507  | rs60519666 | rs60595076 |
| rs60045856  | rs6013     | rs6019378  | rs602633   | rs6032614  | rs604255   | rs605203   | rs60595656 |
| rs60048592  | rs601310   | rs6019386  | rs6026449  | rs6032662  | rs60428870 | rs60520302 | rs6059655  |
| rs6004882   | rs60131261 | rs60194061 | rs602651   | rs6032664  | rs604290   | rs60521023 | rs6059662  |
| rs60049679  | rs60131931 | rs6019483  | rs602652   | rs60327283 | rs6042935  | rs6052122  | rs6059844  |
| rs600518    | rs6013210  | rs6019512  | rs6026578  | rs6032942  | rs60431147 | rs60521849 | rs6059932  |
| rs60054445  | rs60132896 | rs6019535  | rs6026580  | rs6032946  | rs60431337 | rs605228   | rs6059958  |
| rs6005455   | rs601338   | rs6019537  | rs6026584  | rs60329942 | rs6043200  | rs60526088 | rs6059988  |
| rs600550    | rs601339   | rs6019663  | rs602662   | rs6033     | rs60432013 | rs6053030  | rs60600003 |
| rs6005807   | rs6013453  | rs6019826  | rs60267257 | rs6033058  | rs60432162 | rs6054     | rs6060114  |
| rs60058315  | rs6013509  | rs6019860  | rs6026739  | rs6033062  | rs6043409  | rs6054018  | rs6060139  |
| rs6005840   | rs6013806  | rs60199046 | rs6026740  | rs60333767 | rs6043521  | rs6054200  | rs6060288  |
| rs6005843   | rs6013892  | rs6019998  | rs6026748  | rs60334317 | rs6043629  | rs6054308  | rs6060308  |
| rs6005857   | rs6013915  | rs60201196 | rs60269255 | rs6033434  | rs6044100  | rs6054364  | rs6060347  |
| rs6005863   | rs60139334 | rs6020157  | rs6027005  | rs6034019  | rs60441301 | rs6054375  | rs6060355  |
| rs6005930   | rs60146098 | rs6020423  | rs6027072  | rs60341058 | rs6045400  | rs6054383  | rs6060369  |
| rs600619    | rs6014657  | rs6020459  | rs6027138  | rs60341384 | rs604551   | rs6054427  | rs6060373  |
| rs6006310   | rs60146811 | rs6020560  | rs6027394  | rs6034146  | rs6045559  | rs6054441  | rs6060395  |
| rs60063444  | rs6014724  | rs6020624  | rs60275617 | rs603424   | rs6045561  | rs6054471  | rs6060402  |
| rs6006399   | rs6014781  | rs6020636  | rs60276348 | rs60343330 | rs6045612  | rs6054512  | rs6060515  |
| rs60064090  | rs60148718 | rs60210378 | rs6028     | rs60343814 | rs6045615  | rs60545357 | rs6060562  |
| rs6006426   | rs601499   | rs6021191  | rs6028083  | rs603446   | rs6045676  | rs6054572  | rs6060578  |
| rs6006427   | rs6014992  | rs6021247  | rs6028085  | rs6034530  | rs60457263 | rs6054625  | rs60605842 |
| rs60065504  | rs6014993  | rs60212594 | rs6028090  | rs6034539  | rs60461751 | rs60547137 | rs6060627  |
| rs60066732  | rs60152647 | rs6021268  | rs60283548 | rs6034875  | rs60461843 | rs60550942 | rs60606273 |
| rs6006984   | rs60153262 | rs6021270  | rs6028446  | rs60354484 | rs6046226  | rs6055286  | rs6060717  |
| rs600704    | rs60154123 | rs6021276  | rs60286666 | rs6035986  | rs60463810 | rs6055748  | rs6060750  |
| rs60071299  | rs6015450  | rs602133   | rs6028718  | rs6036478  | rs60464047 | rs6055955  | rs6060775  |
| rs60074425  | rs6015543  | rs6021602  | rs602875   | rs6036507  | rs60466842 | rs6056     | rs6060796  |
| rs6007506   | rs60156285 | rs6021798  | rs6028981  | rs6037062  | rs6046818  | rs605642   | rs60609026 |
| rs6007594   | rs60157091 | rs6021889  | rs6029130  | rs60370741 | rs604723   | rs60565673 | rs6060912  |
| rs60078183a | rs60159418 | rs6021914  | rs6029180  | rs60371688 | rs6047287  | rs6056847  | rs6060930  |
| rs600806    | rs6016142  | rs6022039  | rs6029234  | rs60372268 | rs60473185 | rs60570301 | rs6060983  |
| rs60081675  | rs6016252  | rs6022494  | rs60292400 | rs6037443  | rs60473539 | rs60572254 | rs6060986  |
| rs6008259   | rs6016373  | rs60227565 | rs6029242  | rs6037523  | rs60473748 | rs60573766 | rs6060987  |
| rs60084722  | rs6016377  | rs60227577 | rs6029258  | rs6037651  | rs6047481  | rs60573957 | rs60610174 |
| rs60089934  | rs6016381  | rs6022786  | rs602950   | rs60384372 | rs6047620  | rs60574493 | rs60610697 |
| rs60093835  | rs60164552 | rs6022850  | rs6029526  | rs6038491  | rs60476496 | rs60575064 | rs6061081  |
| rs600951    | rs6016505  | rs6022858  | rs6029549  | rs60386053 | rs6047663  | rs6057610  | rs6061162  |

|            |            |            |            |            |            |            |            |
|------------|------------|------------|------------|------------|------------|------------|------------|
| rs6061231  | rs6066043  | rs6072221  | rs60781577 | rs6087579  | rs6092477  | rs61021634 | rs6112307  |
| rs6061244  | rs6066093  | rs6072223  | rs607816   | rs6087607  | rs60925406 | rs61022741 | rs61123157 |
| rs6061548  | rs6066101  | rs6072279  | rs60782127 | rs6087613  | rs60925903 | rs6102322  | rs61123794 |
| rs6061555  | rs6066121  | rs6072343  | rs6078373  | rs6087685  | rs60929339 | rs6102343  | rs61123801 |
| rs60616179 | rs6066131  | rs6072345  | rs6078460  | rs6087709  | rs60929679 | rs61024420 | rs6112527  |
| rs60619538 | rs6066138  | rs60725845 | rs60785803 | rs6087771  | rs609316   | rs61025394 | rs6113382  |
| rs60621493 | rs6066141  | rs60726488 | rs60786079 | rs6087783  | rs60931638 | rs6102913  | rs6113393  |
| rs6062237  | rs6066150  | rs6072971  | rs607900   | rs6087988  | rs60932796 | rs6103254  | rs6113491  |
| rs6062264  | rs6066181  | rs60730    | rs6079065  | rs6087990  | rs6093370  | rs6103271  | rs6113492  |
| rs6062277  | rs6066184  | rs6073074  | rs607929   | rs60882754 | rs6093446  | rs61033544 | rs61134960 |
| rs6062278  | rs6066222  | rs6073075  | rs6079463  | rs6088347  | rs60936317 | rs6103572  | rs6113507  |
| rs6062302  | rs60667919 | rs6073143  | rs6080550  | rs60884546 | rs60936670 | rs6103575  | rs61137716 |
| rs6062304  | rs60668206 | rs6073289  | rs60806638 | rs6088466  | rs60938452 | rs6103666  | rs6114027  |
| rs6062314  | rs6066825  | rs6073293  | rs6080761  | rs60884807 | rs60940178 | rs6103669  | rs6114248  |
| rs6062322  | rs6066835  | rs60733335 | rs6080859  | rs6088528  | rs6094239  | rs6103716  | rs611439   |
| rs6062343  | rs6066861  | rs6073354  | rs60808706 | rs6088575  | rs60942635 | rs61039700 | rs61147618 |
| rs6062344  | rs6066975  | rs607342   | rs6081559  | rs6088580  | rs6094272  | rs61040371 | rs61148001 |
| rs6062380  | rs6067053  | rs6073431  | rs6081569  | rs6088590  | rs60944507 | rs6104052  | rs611499   |
| rs6062486  | rs6067384  | rs6073619  | rs6081613  | rs6088618  | rs60945451 | rs61041384 | rs6115024  |
| rs6062496  | rs6067417  | rs607375   | rs6081819  | rs6088619  | rs6094570  | rs61045038 | rs6115094  |
| rs6062498  | rs6067464  | rs6073782  | rs60820984 | rs6088621  | rs60946162 | rs6104543  | rs61154119 |
| rs6062504  | rs6067645  | rs6073833  | rs60822569 | rs60886478 | rs6094710  | rs61049169 | rs61160081 |
| rs6062509  | rs6068117  | rs6073957  | rs6082354  | rs6088734  | rs6094791  | rs610493   | rs61160187 |
| rs6062510  | rs6068280  | rs6073958  | rs6082358  | rs6088735  | rs6094982  | rs61051952 | rs6116019  |
| rs6062536  | rs6068290  | rs6073966  | rs608236   | rs6088765  | rs6095241  | rs6105452  | rs6116031  |
| rs6062541  | rs60683614 | rs6073972  | rs6082544  | rs6088776  | rs60952428 | rs61055995 | rs61162958 |
| rs6062576  | rs60687267 | rs6074012  | rs6082600  | rs6088793  | rs6095298  | rs610578   | rs6116471  |
| rs6062682  | rs6068729  | rs6074013  | rs60826346 | rs6088813  | rs6095360  | rs610604   | rs61165644 |
| rs60628344 | rs60689780 | rs6074015  | rs608293   | rs6088855  | rs60954078 | rs6106115  | rs61166126 |
| rs6063048  | rs60690028 | rs6074021  | rs6083037  | rs6088882  | rs6095417  | rs6106336  | rs61168554 |
| rs6063050  | rs6069151  | rs6074022  | rs60830908 | rs60890741 | rs60955950 | rs61067109 | rs61169879 |
| rs6063051  | rs60691990 | rs607404   | rs60833045 | rs6089075  | rs6095946  | rs61068276 | rs611704   |
| rs6063085  | rs6069234  | rs6074197  | rs60833441 | rs60891864 | rs60965469 | rs61071861 | rs61171454 |
| rs60633358 | rs60693099 | rs6074203  | rs6083730  | rs6089229  | rs6096886  | rs6107516  | rs6117294  |
| rs60634368 | rs6069325  | rs60743220 | rs6083743  | rs608930   | rs6096939  | rs61076041 | rs6117356  |
| rs60634637 | rs60693488 | rs607472   | rs60839038 | rs6089381  | rs6096947  | rs61077924 | rs611744   |
| rs6063502  | rs6069391  | rs6074798  | rs60839105 | rs6089384  | rs609702   | rs6107845  | rs6117562  |
| rs6063514  | rs606950   | rs60748394 | rs6084309  | rs6089391  | rs6097050  | rs6107848  | rs6117637  |
| rs6063523  | rs60695258 | rs607484   | rs60843830 | rs6089584  | rs60975849 | rs6107855  | rs6117652  |
| rs6063526  | rs60695341 | rs60749569 | rs60843925 | rs608966   | rs6097618  | rs61078946 | rs6117690  |
| rs606393   | rs6069625  | rs60750824 | rs6084574  | rs6089904  | rs60976990 | rs61079096 | rs6117725  |
| rs6063965  | rs6069736  | rs607518   | rs60846313 | rs6089970  | rs60978556 | rs6108168  | rs6117726  |
| rs60640814 | rs60697456 | rs60752752 | rs6084646  | rs6090008  | rs60980157 | rs6108653  | rs61177759 |
| rs60643529 | rs60698178 | rs6075340  | rs6084653  | rs60900293 | rs60980181 | rs6108784  | rs6117779  |
| rs6064518  | rs60699901 | rs6075658  | rs60848348 | rs6090040  | rs60981167 | rs6108787  | rs6117854  |
| rs606452   | rs6070     | rs6075733  | rs6085497  | rs6090101  | rs60984271 | rs6108789  | rs611847   |
| rs60645432 | rs60701    | rs60757417 | rs6085551  | rs6090103  | rs60986682 | rs6108796  | rs61188026 |
| rs6064559  | rs6070139  | rs6075769  | rs6085568  | rs609018   | rs60987133 | rs61088131 | rs6119     |
| rs606458   | rs60701633 | rs60762712 | rs6085649  | rs60902112 | rs60989770 | rs6108881  | rs611916   |
| rs6065     | rs6070625  | rs60764613 | rs6085658  | rs6090583  | rs60990105 | rs61090190 | rs611917   |
| rs6065080  | rs6070664  | rs6076628  | rs6085661  | rs60906625 | rs6099273  | rs610917   | rs61192126 |
| rs6065094  | rs6070696  | rs6076983  | rs6085662  | rs60907808 | rs6099283  | rs610930   | rs61192259 |
| rs6065171  | rs60707923 | rs6077011  | rs60856912 | rs6090919  | rs60992881 | rs610932   | rs6119267  |
| rs6065223  | rs6070941  | rs60772015 | rs60856990 | rs6090940  | rs6099524  | rs61093223 | rs6119279  |
| rs6065254  | rs6071524  | rs6077240  | rs6085728  | rs60909458 | rs6099612  | rs61098410 | rs6119294  |
| rs60652743 | rs6071573  | rs60772526 | rs6085831  | rs6090988  | rs609990   | rs611010   | rs61194703 |
| rs6065311  | rs60716475 | rs607736   | rs6085968  | rs60910901 | rs60999980 | rs61101201 | rs6119510  |
| rs6065325  | rs60717250 | rs6077396  | rs6086143  | rs6091153  | rs6100174  | rs61104616 | rs6119524  |
| rs60654199 | rs60717745 | rs607779   | rs60862347 | rs6091176  | rs6100340  | rs6110524  | rs6119569  |
| rs606552   | rs6071837  | rs60778117 | rs60865046 | rs6091213  | rs610037   | rs61106808 | rs6119628  |
| rs60656193 | rs60718933 | rs6077868  | rs6086540  | rs6091248  | rs61005347 | rs6111174  | rs6119771  |
| rs6065668  | rs607203   | rs6077869  | rs60871711 | rs6091540  | rs61009920 | rs61112052 | rs6119893  |
| rs6065784  | rs6072078  | rs60779155 | rs6087358  | rs6091570  | rs610116   | rs61116130 | rs6119897  |
| rs60658082 | rs6072080  | rs6077999  | rs608736   | rs6091758  | rs6101273  | rs6111715  | rs6120005  |
| rs6065904  | rs6072081  | rs6078002  | rs6087480  | rs60918921 | rs6102059  | rs61117663 | rs61204066 |
| rs6065906  | rs6072084  | rs60780116 | rs60874983 | rs6092179  | rs6102074  | rs611203   | rs6120804  |
| rs6065908  | rs60721377 | rs6078091  | rs6087557  | rs6092194  | rs6102095  | rs6112072  | rs6120815  |

|            |             |            |            |            |            |            |            |
|------------|-------------|------------|------------|------------|------------|------------|------------|
| rs6120848  | rs6128      | rs61360200 | rs61416196 | rs61508189 | rs61678849 | rs61744628 | rs61769193 |
| rs6120849  | rs61280460  | rs6136033  | rs6141652  | rs61509315 | rs61679001 | rs61744929 | rs61769611 |
| rs6120854  | rs61286700  | rs61360336 | rs6141668  | rs61510274 | rs61687445 | rs61745017 | rs61769642 |
| rs6120880  | rs61288291  | rs613614   | rs6141743  | rs61511521 | rs61688134 | rs61745086 | rs61769779 |
| rs6120946  | rs6128857   | rs61361413 | rs6141755  | rs61511922 | rs61693171 | rs617453   | rs61771715 |
| rs6120974  | rs6129229   | rs61361629 | rs6141766  | rs615134   | rs61696028 | rs61745454 | rs61771785 |
| rs6120993  | rs6129493   | rs61361928 | rs6141772  | rs6151429  | rs61698755 | rs61745945 | rs61772132 |
| rs61210140 | rs6129564   | rs6136377  | rs6141779  | rs61523168 | rs617030   | rs61746505 | rs61772578 |
| rs6121038  | rs61296342  | rs6136407  | rs6141781  | rs61524473 | rs61708525 | rs61746970 | rs61772626 |
| rs6121246  | rs6129648   | rs6136437  | rs6141814  | rs61527214 | rs61709988 | rs61747002 | rs61773374 |
| rs6121264  | rs6129653   | rs6136465  | rs61419856 | rs61528333 | rs617117   | rs61747094 | rs61773390 |
| rs6121406  | rs61296613  | rs6136489  | rs61420024 | rs61533748 | rs617119   | rs61747226 | rs61774002 |
| rs6121604  | rs61296728  | rs6136493  | rs6142067  | rs61536380 | rs61712781 | rs61747555 | rs61774743 |
| rs61216514 | rs6129760   | rs61367953 | rs6142068  | rs61537885 | rs617219   | rs61747728 | rs61775135 |
| rs612169   | rs6129767   | rs6137015  | rs6142096  | rs61542570 | rs61729512 | rs61747867 | rs61775180 |
| rs61217499 | rs6129778   | rs6137042  | rs6142137  | rs61542988 | rs61729527 | rs61748094 | rs61775418 |
| rs61219582 | rs6129880   | rs61371450 | rs6142147  | rs61544985 | rs61729990 | rs61748567 | rs61775431 |
| rs6122051  | rs61300392  | rs61372148 | rs61421564 | rs61547234 | rs61730011 | rs61748637 | rs61775910 |
| rs61221361 | rs6130328   | rs6137287  | rs6142206  | rs615477   | rs61731111 | rs61748681 | rs61776255 |
| rs6122248  | rs61303432  | rs61373376 | rs6142381  | rs615567   | rs61731122 | rs61748861 | rs61776295 |
| rs6122579  | rs6130360   | rs6137371  | rs6142416  | rs615568   | rs61732778 | rs61748951 | rs61776403 |
| rs6122735  | rs6130613   | rs6137442  | rs6142422  | rs615632   | rs61733346 | rs61749613 | rs61776663 |
| rs6122773  | rs6130764   | rs6137444  | rs6142618  | rs615672   | rs61733486 | rs61750222 | rs61776678 |
| rs6122906  | rs6130929   | rs6137446  | rs6142630  | rs61572747 | rs61733609 | rs61750370 | rs617767   |
| rs6122940  | rs6130975   | rs61374510 | rs614288   | rs61576608 | rs61733768 | rs61750467 | rs61776719 |
| rs61232477 | rs6131010   | rs613746   | rs6143006  | rs61578235 | rs61734100 | rs61750929 | rs61776840 |
| rs6123359  | rs6131012   | rs6137473  | rs6143009  | rs61578783 | rs61734177 | rs61750953 | rs61777072 |
| rs6123471  | rs6131100   | rs61375854 | rs61433703 | rs61579022 | rs61734341 | rs61751198 | rs61777387 |
| rs6123685  | rs6131281   | rs613808   | rs61433759 | rs61579137 | rs61734410 | rs61751507 | rs61777615 |
| rs6123697  | rs6131703   | rs6138152  | rs61435086 | rs61582735 | rs61734497 | rs61751862 | rs61778000 |
| rs61237505 | rs6131711   | rs61381724 | rs614367   | rs61584523 | rs61734601 | rs61751933 | rs61778068 |
| rs61237993 | rs61317550  | rs61381915 | rs614385   | rs61591132 | rs61734645 | rs61751937 | rs61778082 |
| rs6123874  | rs6131805   | rs61382221 | rs61440199 | rs61595816 | rs61734651 | rs61752561 | rs61778217 |
| rs6123924  | rs61318457  | rs61384251 | rs6144337  | rs61596977 | rs61734696 | rs61752717 | rs61778219 |
| rs61240102 | rs6131942   | rs6138458  | rs61447909 | rs61597598 | rs61735430 | rs61752771 | rs61778692 |
| rs6124077  | rs6132053   | rs6138537  | rs61448762 | rs61598054 | rs61735998 | rs61753266 | rs61778693 |
| rs6124259  | rs61320678  | rs6138584  | rs614508   | rs616111   | rs61736066 | rs61753528 | rs61778883 |
| rs6124687  | rs613223    | rs6138639  | rs614515   | rs61612642 | rs61736074 | rs61753651 | rs61779275 |
| rs6124760  | rs6132543   | rs61387190 | rs61454271 | rs61614579 | rs61736454 | rs61754122 | rs61779282 |
| rs6124765  | rs61327788  | rs613872   | rs6145546  | rs616147   | rs61738953 | rs61754158 | rs61779284 |
| rs6124901  | rs61331678  | rs61387839 | rs61456361 | rs616157   | rs61739176 | rs61754230 | rs61779781 |
| rs6124969  | rs61332075  | rs6138813  | rs6145676  | rs616162   | rs61739251 | rs61754233 | rs61780038 |
| rs6124977  | rs61333282  | rs61389091 | rs61458527 | rs6163     | rs61739285 | rs61754851 | rs61780049 |
| rs61250563 | rs613334940 | rs6138937  | rs614591   | rs61630159 | rs61739314 | rs61755050 | rs61780429 |
| rs6125486  | rs6133544   | rs6139030  | rs61462345 | rs616338   | rs61739424 | rs61755388 | rs61780431 |
| rs6125597  | rs61336918  | rs6139076  | rs6146484  | rs616346   | rs61739710 | rs61755431 | rs61780435 |
| rs612563   | rs61337452  | rs6139104  | rs614691   | rs61637848 | rs61739908 | rs61755579 | rs61781020 |
| rs6125656  | rs6133957   | rs6139113  | rs6146925  | rs61640416 | rs61739909 | rs61757207 | rs61781106 |
| rs61257528 | rs6133987   | rs61394862 | rs61469632 | rs61641082 | rs61740466 | rs61757207 | rs61781106 |
| rs6125961  | rs6134000   | rs61398800 | rs61469827 | rs61642945 | rs61740470 | rs61758087 | rs61781290 |
| rs6126015  | rs6134023   | rs6139943  | rs61472021 | rs616451   | rs61741262 | rs61758378 | rs61781308 |
| rs6126016  | rs6134031   | rs6140009  | rs614754   | rs61646837 | rs61741508 | rs61758703 | rs61781370 |
| rs6126017  | rs6134038   | rs61400090 | rs6147688  | rs616488   | rs61741649 | rs61758883 | rs61783053 |
| rs6126019  | rs6134049   | rs6140010  | rs6147748  | rs61649748 | rs61741874 | rs61759167 | rs61783169 |
| rs6126042  | rs6134088   | rs6140050  | rs6147862  | rs61652119 | rs61741902 | rs61759358 | rs61783217 |
| rs6126249  | rs61342118  | rs6140183  | rs614802   | rs61653296 | rs61742093 | rs61759532 | rs61783466 |
| rs61263161 | rs61342867  | rs61404834 | rs6148453  | rs61656398 | rs61742221 | rs61759760 | rs61784651 |
| rs612652   | rs613470    | rs61406265 | rs61491549 | rs61658003 | rs61743199 | rs61760320 | rs61784824 |
| rs61269268 | rs61348208  | rs61408162 | rs61491840 | rs616582   | rs61743591 | rs61760909 | rs61784834 |
| rs6126982  | rs61348346  | rs61408740 | rs61494024 | rs61659085 | rs61743745 | rs61761991 | rs61784835 |
| rs6126985  | rs61352607  | rs61409174 | rs614973   | rs616596   | rs61743746 | rs61762319 | rs61786416 |
| rs61270009 | rs6135385   | rs61409925 | rs6149819  | rs61661087 | rs61744010 | rs61765555 | rs61787263 |
| rs6127099  | rs613540    | rs61409971 | rs61499730 | rs61665417 | rs61744130 | rs61765646 | rs61789073 |
| rs612720   | rs61358232  | rs6141     | rs61500084 | rs61665871 | rs61744384 | rs61765651 | rs61789318 |
| rs6127471  | rs61358955  | rs6141378  | rs61501369 | rs61667602 | rs61744388 | rs61766763 | rs61789561 |
| rs6127860  | rs613597    | rs6141479  | rs61502648 | rs61669709 | rs61744399 | rs61767086 | rs61789601 |
| rs6127868  | rs6136      | rs6141600  | rs6150565  | rs61676547 | rs61744408 | rs61767420 | rs61790808 |



|            |            |             |            |            |            |            |            |
|------------|------------|-------------|------------|------------|------------|------------|------------|
| rs61791109 | rs61828723 | rs61874116  | rs61903695 | rs61938101 | rs61976132 | rs62006791 | rs62026494 |
| rs61791368 | rs61828917 | rs61874768  | rs61903723 | rs61938803 | rs61976859 | rs620068   | rs62026817 |
| rs61791369 | rs61829959 | rs61875203  | rs61903841 | rs61938844 | rs61977073 | rs62006947 | rs62027291 |
| rs61791721 | rs61830291 | rs61875311  | rs61904693 | rs61938858 | rs61977111 | rs62007171 | rs62027307 |
| rs61796569 | rs61830526 | rs61875400  | rs61904987 | rs61938962 | rs61977313 | rs62007299 | rs62027787 |
| rs61796681 | rs61830764 | rs61875435  | rs61905078 | rs61939692 | rs61978655 | rs62007304 | rs62028332 |
| rs61797063 | rs61835223 | rs61875762  | rs61905084 | rs61941261 | rs61978928 | rs62007683 | rs62029652 |
| rs61798467 | rs61838753 | rs61876250  | rs61905363 | rs61941262 | rs61978932 | rs62007684 | rs62029752 |
| rs61798586 | rs61838772 | rs61876492  | rs61905505 | rs61941274 | rs61980001 | rs62007686 | rs62030874 |
| rs61798917 | rs61839660 | rs61876729  | rs61905599 | rs61941676 | rs61980273 | rs62007693 | rs62031961 |
| rs61799395 | rs61840192 | rs61876744  | rs61905706 | rs61941677 | rs61980882 | rs62007727 | rs62031988 |
| rs61800588 | rs61841332 | rs61878480  | rs61905747 | rs61941722 | rs61983272 | rs62007773 | rs62032001 |
| rs618006   | rs61843417 | rs61878546  | rs61906997 | rs61942058 | rs61984497 | rs62007780 | rs62032164 |
| rs61801824 | rs61845162 | rs61878772  | rs61907000 | rs61942632 | rs61984499 | rs62007782 | rs62033399 |
| rs61801836 | rs61846062 | rs61879810  | rs61907710 | rs61943549 | rs61984763 | rs62007784 | rs62033400 |
| rs61802846 | rs61847070 | rs61881138  | rs61907712 | rs61944841 | rs61985136 | rs62008078 | rs62033401 |
| rs61803338 | rs61847303 | rs61881566  | rs61907713 | rs619450   | rs61985370 | rs620088   | rs62033403 |
| rs61804160 | rs61847307 | rs61881743  | rs61907718 | rs61945108 | rs61985411 | rs62009090 | rs62033406 |
| rs61804164 | rs61848153 | rs61882743  | rs61907765 | rs619456   | rs61986118 | rs62009152 | rs62033408 |
| rs61804635 | rs61848342 | rs61883178  | rs619087   | rs619460   | rs61986330 | rs62010554 | rs62033417 |
| rs61805075 | rs61849823 | rs618835    | rs61908718 | rs61946325 | rs619865   | rs62011028 | rs62033860 |
| rs61805076 | rs6185     | rs61884005  | rs619091   | rs61946386 | rs61986598 | rs62011052 | rs62033985 |
| rs61806235 | rs61850655 | rs61884030  | rs61909165 | rs619466   | rs61986932 | rs62011285 | rs62034121 |
| rs61806853 | rs61850657 | rs61884307  | rs61910767 | rs61948108 | rs61987137 | rs62011286 | rs62034139 |
| rs61808983 | rs61850682 | rs61884327  | rs61912333 | rs61949650 | rs61987429 | rs62011287 | rs62034143 |
| rs61812092 | rs61850684 | rs61884328  | rs61913892 | rs61950149 | rs61988231 | rs62011291 | rs62034318 |
| rs61812598 | rs61850977 | rs61884449  | rs61914312 | rs61952071 | rs61988304 | rs62012358 | rs62034319 |
| rs61813293 | rs61850980 | rs61885091  | rs61914396 | rs61952219 | rs61988556 | rs620124   | rs62034325 |
| rs61813324 | rs61851769 | rs618854    | rs61914406 | rs61952920 | rs61989382 | rs62012628 | rs62034975 |
| rs61813875 | rs61853274 | rs61885960  | rs61914515 | rs61953351 | rs61989671 | rs62012770 | rs62035088 |
| rs618145   | rs61853335 | rs61886179  | rs61915924 | rs61953423 | rs61990287 | rs62012772 | rs62035176 |
| rs61814883 | rs61853587 | rs61886201  | rs61916664 | rs61954177 | rs61990288 | rs62012774 | rs62036618 |
| rs61815089 | rs61854130 | rs61886764  | rs61916675 | rs61955029 | rs61991614 | rs62012778 | rs62036624 |
| rs61815559 | rs61854835 | rs61886926  | rs61917947 | rs61955089 | rs61991628 | rs62013227 | rs62036940 |
| rs61815704 | rs61855497 | rs61887762  | rs61918270 | rs61955196 | rs61992671 | rs62013236 | rs62037084 |
| rs61816194 | rs61855700 | rs61887821  | rs61919816 | rs61955214 | rs61993680 | rs62014490 | rs62037146 |
| rs61816282 | rs61855715 | rs61888762  | rs61920210 | rs61957178 | rs61993685 | rs62015883 | rs62037363 |
| rs61816761 | rs61856128 | rs618888    | rs61921372 | rs61957289 | rs61996546 | rs62015884 | rs62037364 |
| rs61816766 | rs61858108 | rs61889186  | rs61921502 | rs61957300 | rs61996704 | rs62016946 | rs62037365 |
| rs61817176 | rs61860854 | rs61889554  | rs61921611 | rs61957597 | rs61997596 | rs62018005 | rs62037423 |
| rs61817477 | rs61861119 | rs61889838  | rs61921763 | rs61958175 | rs61997624 | rs62018159 | rs62037427 |
| rs61817490 | rs61861298 | rs61890097  | rs61922044 | rs61959448 | rs61997667 | rs62018215 | rs62038775 |
| rs61818031 | rs61861422 | rs61890184d | rs61922185 | rs61959481 | rs61998208 | rs62018216 | rs62038917 |
| rs618184   | rs61862780 | rs61890355  | rs61923561 | rs61959596 | rs61998254 | rs62018380 | rs62039170 |
| rs61818802 | rs61863693 | rs61890450  | rs61923789 | rs61960013 | rs61998565 | rs620191   | rs62039274 |
| rs61818925 | rs61863767 | rs61890515  | rs61925898 | rs61962192 | rs62000665 | rs62019145 | rs62039712 |
| rs61819267 | rs61863818 | rs61891388  | rs61926181 | rs61962202 | rs62002282 | rs62020698 | rs62039768 |
| rs61820496 | rs61863928 | rs61892344  | rs61926301 | rs61963123 | rs62003261 | rs62020748 | rs62041356 |
| rs618205   | rs61865614 | rs61894507  | rs61927245 | rs61963337 | rs62003467 | rs62020769 | rs62041532 |
| rs61821315 | rs61865900 | rs61894547  | rs61928421 | rs61963491 | rs62003514 | rs62020775 | rs62043313 |
| rs61821567 | rs61866017 | rs61895110  | rs61929307 | rs61964388 | rs62003775 | rs62021164 | rs62043959 |
| rs61822568 | rs61867141 | rs61896141  | rs61930810 | rs61965473 | rs62004794 | rs62021203 | rs62044525 |
| rs61823001 | rs61867238 | rs61897360  | rs61931005 | rs61966459 | rs62004865 | rs62022112 | rs62044987 |
| rs61823192 | rs61867293 | rs61897429  | rs61931988 | rs61967118 | rs62004866 | rs62022317 | rs62045844 |
| rs61823391 | rs61867294 | rs61897431  | rs61932023 | rs61967422 | rs62005083 | rs62022865 | rs62045849 |
| rs61823972 | rs61867341 | rs61897795  | rs61932784 | rs61967710 | rs62005276 | rs62022924 | rs62046579 |
| rs61824384 | rs61867369 | rs61898064  | rs61933589 | rs61969071 | rs62005623 | rs62023121 | rs62046625 |
| rs61824886 | rs61868084 | rs61898819  | rs61934664 | rs61969075 | rs62005807 | rs62023145 | rs62047010 |
| rs61824887 | rs61869763 | rs61900578  | rs61935525 | rs61969407 | rs62005941 | rs62023486 | rs62047280 |
| rs61824911 | rs61871243 | rs619010    | rs61936282 | rs61969510 | rs62005949 | rs62023891 | rs62047964 |
| rs61825638 | rs61871342 | rs61901554  | rs61936936 | rs61971082 | rs62005993 | rs62024476 | rs62047970 |
| rs61826177 | rs61871700 | rs61901730  | rs61937364 | rs61974485 | rs62006172 | rs62024517 | rs62048007 |
| rs61826793 | rs61872090 | rs61901866  | rs61937595 | rs61974535 | rs62006258 | rs62025141 | rs62048187 |
| rs61827266 | rs61872120 | rs61902492  | rs61937656 | rs61975075 | rs620064   | rs62025270 | rs62048402 |
| rs61827378 | rs61872688 | rs61902811  | rs61937675 | rs61975764 | rs62006538 | rs62025778 | rs62048478 |
| rs61828284 | rs61873510 | rs61902812  | rs61937878 | rs61975915 | rs62006636 | rs62026376 | rs62048491 |
| rs61828641 | rs61874020 | rs61903412  | rs61938093 | rs61975988 | rs62006777 | rs62026377 | rs62048856 |

|            |            |            |            |            |            |            |            |
|------------|------------|------------|------------|------------|------------|------------|------------|
| rs62049035 | rs62064595 | rs62082401 | rs62105489 | rs62129966 | rs62151109 | rs62177350 | rs62195997 |
| rs62049427 | rs62064598 | rs62082402 | rs62106252 | rs62129968 | rs62151617 | rs62177354 | rs62196198 |
| rs62049757 | rs62064641 | rs62083740 | rs62106258 | rs62129970 | rs62152284 | rs62177359 | rs62198536 |
| rs620498   | rs62064941 | rs62084234 | rs62106670 | rs62130059 | rs62153409 | rs62177991 | rs62198803 |
| rs62049817 | rs62065084 | rs62084237 | rs62106697 | rs62130120 | rs62153852 | rs62178545 | rs62199218 |
| rs62049973 | rs62065197 | rs62084690 | rs62107115 | rs62130499 | rs62154466 | rs62178782 | rs62200787 |
| rs62050038 | rs62065216 | rs62084693 | rs62107261 | rs62130978 | rs62154720 | rs62179061 | rs62200793 |
| rs62051146 | rs62065255 | rs62084752 | rs62109854 | rs621313   | rs62154930 | rs62179345 | rs62201071 |
| rs620513   | rs62065453 | rs62084910 | rs62109862 | rs62131523 | rs62155350 | rs62179650 | rs62201738 |
| rs62051384 | rs62066008 | rs62085020 | rs62109874 | rs62132014 | rs62155511 | rs62179714 | rs62202111 |
| rs62051533 | rs62066768 | rs62085660 | rs62109902 | rs62132278 | rs62155770 | rs62179734 | rs62202837 |
| rs62051538 | rs62066853 | rs62085764 | rs62109939 | rs62132293 | rs62155873 | rs62180237 | rs62203108 |
| rs62051555 | rs62067054 | rs62086046 | rs62110939 | rs62132342 | rs62155874 | rs62180324 | rs62204977 |
| rs62052663 | rs62067167 | rs620861   | rs62111417 | rs62132389 | rs62156361 | rs62180970 | rs62205396 |
| rs62052820 | rs62067239 | rs62086903 | rs62111672 | rs62132522 | rs62156695 | rs62181012 | rs62205397 |
| rs62052916 | rs62068188 | rs62087214 | rs62111681 | rs62132802 | rs62157933 | rs62181560 | rs62205790 |
| rs62053077 | rs62068199 | rs62087474 | rs62111724 | rs62133135 | rs62158169 | rs62181736 | rs622076   |
| rs62053102 | rs62068432 | rs62087954 | rs62112661 | rs62133340 | rs62158170 | rs62182100 | rs62208127 |
| rs62053191 | rs62068737 | rs62088172 | rs62112763 | rs62133955 | rs62158206 | rs62182125 | rs622082   |
| rs62053262 | rs620695   | rs62088463 | rs62113093 | rs62133983 | rs62158211 | rs62182127 | rs62209647 |
| rs62053580 | rs62069681 | rs620891   | rs62113212 | rs62134189 | rs62158591 | rs62182131 | rs62209872 |
| rs62053943 | rs62069691 | rs62089694 | rs62113694 | rs62134282 | rs62159471 | rs62182135 | rs62210146 |
| rs62053992 | rs62070183 | rs62089970 | rs62113716 | rs62135070 | rs62159864 | rs62182438 | rs62210588 |
| rs62054567 | rs62070229 | rs62090515 | rs62113852 | rs62135167 | rs62159867 | rs62182760 | rs62210619 |
| rs62054807 | rs62070270 | rs62090852 | rs62113853 | rs62135193 | rs62160676 | rs62182788 | rs62210866 |
| rs62055084 | rs62070431 | rs62091461 | rs62114506 | rs62135521 | rs62162286 | rs62182810 | rs62211613 |
| rs62055544 | rs62070631 | rs62091998 | rs62115715 | rs62135525 | rs62162297 | rs62182993 | rs62211616 |
| rs62055546 | rs62070634 | rs62092000 | rs62115757 | rs62135536 | rs62162674 | rs62182994 | rs62211621 |
| rs62055691 | rs62070648 | rs62092069 | rs62116889 | rs62136099 | rs62162863 | rs62183012 | rs62211989 |
| rs62055701 | rs62070652 | rs62092157 | rs62116961 | rs62136106 | rs62163199 | rs62183028 | rs62212171 |
| rs62055780 | rs62070804 | rs62092949 | rs62116990 | rs62137126 | rs62163546 | rs62183029 | rs62212173 |
| rs62055866 | rs62071306 | rs62093218 | rs62117160 | rs62139120 | rs62164492 | rs62183032 | rs62213410 |
| rs62055935 | rs62072049 | rs62093409 | rs62117489 | rs62139588 | rs62164518 | rs62183540 | rs62213452 |
| rs62056161 | rs62072497 | rs62093514 | rs62117911 | rs62139656 | rs62164915 | rs62183651 | rs62213589 |
| rs62056163 | rs62072534 | rs62093946 | rs62118464 | rs6214     | rs62165280 | rs62183808 | rs62213709 |
| rs62056165 | rs620729   | rs62094571 | rs62118471 | rs62140395 | rs62165726 | rs62184483 | rs62213732 |
| rs62056167 | rs62073016 | rs62095889 | rs62118504 | rs62140599 | rs62165906 | rs62184863 | rs622169   |
| rs62056198 | rs62073017 | rs62096058 | rs621189   | rs62140616 | rs62166490 | rs62185668 | rs62217022 |
| rs62056490 | rs62073356 | rs62096518 | rs62119115 | rs62140695 | rs62167177 | rs62185728 | rs62217798 |
| rs62056789 | rs62073542 | rs62097857 | rs62119267 | rs62141075 | rs62167670 | rs62186584 | rs62217799 |
| rs62057061 | rs62073635 | rs62097899 | rs62119893 | rs62141280 | rs62167901 | rs62187110 | rs62217925 |
| rs62057070 | rs62073968 | rs62097986 | rs62119898 | rs62141290 | rs62167939 | rs62187537 | rs62217928 |
| rs62057090 | rs62073988 | rs62098013 | rs62120155 | rs621421   | rs62168821 | rs62187541 | rs62217931 |
| rs62057107 | rs62074014 | rs62098054 | rs62120394 | rs62142342 | rs62168891 | rs62188040 | rs62217959 |
| rs62057151 | rs62074125 | rs62098160 | rs62120573 | rs62142886 | rs62169190 | rs62188629 | rs62219001 |
| rs62058023 | rs62075585 | rs62098997 | rs62121122 | rs62142891 | rs62169493 | rs62189029 | rs62219289 |
| rs62058277 | rs62075722 | rs62099069 | rs62122481 | rs62143187 | rs62169544 | rs62189261 | rs62219561 |
| rs62059712 | rs62075723 | rs62099910 | rs62122515 | rs62143194 | rs62169549 | rs62190384 | rs62220604 |
| rs62059794 | rs62075804 | rs62099911 | rs62124511 | rs62143196 | rs62170775 | rs62190394 | rs622217   |
| rs62059801 | rs62076019 | rs62100531 | rs62124688 | rs62143197 | rs62170823 | rs62190914 | rs62222096 |
| rs62059803 | rs62076103 | rs62100765 | rs62124708 | rs62143198 | rs62171406 | rs62191087 | rs62223042 |
| rs62059826 | rs62076439 | rs62100775 | rs62124717 | rs62143199 | rs62171698 | rs62191105 | rs62223500 |
| rs62059839 | rs62076505 | rs62100776 | rs62124718 | rs62143206 | rs62171962 | rs62191340 | rs62226440 |
| rs62060349 | rs62076928 | rs62102136 | rs62125861 | rs62143212 | rs62172064 | rs62191565 | rs62227042 |
| rs620612   | rs62078384 | rs62102718 | rs62126408 | rs621437-C | rs62172117 | rs62191825 | rs62227043 |
| rs62061733 | rs62078489 | rs62103056 | rs62126581 | rs62144048 | rs62172372 | rs62193063 | rs62227671 |
| rs62061734 | rs62078811 | rs62103177 | rs62126592 | rs62144560 | rs62172376 | rs62193080 | rs62227724 |
| rs62062271 | rs62079448 | rs62103198 | rs62126643 | rs62144584 | rs62172472 | rs62193087 | rs62228060 |
| rs62062288 | rs62079870 | rs62103272 | rs62127532 | rs62146540 | rs62172701 | rs62193162 | rs62228064 |
| rs62062609 | rs62080072 | rs62103293 | rs62127635 | rs62147239 | rs62173239 | rs62193862 | rs62229266 |
| rs62062797 | rs62080313 | rs62103295 | rs62127977 | rs62147658 | rs62173537 | rs62194158 | rs62229372 |
| rs62063281 | rs62080325 | rs62103445 | rs62128132 | rs62148311 | rs62174422 | rs62194170 | rs62229760 |
| rs62063286 | rs62081465 | rs62104180 | rs621287   | rs62149404 | rs62174974 | rs62194185 | rs62231822 |
| rs62063786 | rs62081500 | rs62104477 | rs62128735 | rs62149416 | rs62175230 | rs62194667 | rs62234058 |
| rs62063930 | rs62081501 | rs62105303 | rs62128801 | rs62149809 | rs62175254 | rs62194948 | rs62234274 |
| rs62064086 | rs62081537 | rs62105306 | rs62129471 | rs62149891 | rs62175972 | rs62195072 | rs62235635 |
| rs62064364 | rs62081768 | rs62105478 | rs62129826 | rs62149908 | rs62176107 | rs62195575 | rs62235681 |

|            |            |            |            |            |            |            |            |
|------------|------------|------------|------------|------------|------------|------------|------------|
| rs62235753 | rs62256002 | rs62268962 | rs62306393 | rs62342738 | rs62371571 | rs62396757 | rs62428831 |
| rs62236533 | rs62256003 | rs62269283 | rs62307263 | rs62343137 | rs62372052 | rs62397245 | rs62429411 |
| rs62236760 | rs62256284 | rs62269521 | rs62307295 | rs62344660 | rs62372061 | rs62397979 | rs62429521 |
| rs62236816 | rs62256378 | rs6227     | rs62307576 | rs62344821 | rs62372074 | rs62398145 | rs62429774 |
| rs62236881 | rs62257549 | rs62270414 | rs62307591 | rs62344826 | rs62372132 | rs62398404 | rs62430436 |
| rs62237039 | rs62257614 | rs62270945 | rs62307736 | rs62346060 | rs62373688 | rs62398471 | rs62430713 |
| rs62237573 | rs62257872 | rs62270949 | rs62308110 | rs62346062 | rs62374016 | rs62398709 | rs62432291 |
| rs62237615 | rs62258408 | rs62271373 | rs62308111 | rs62346126 | rs62374461 | rs62399010 | rs62432759 |
| rs62237617 | rs62258655 | rs62272016 | rs62308489 | rs623479   | rs62375246 | rs62399042 | rs62433864 |
| rs62237815 | rs62259026 | rs62272679 | rs62310771 | rs62347916 | rs62375251 | rs62400317 | rs62434109 |
| rs62238180 | rs62259232 | rs62272800 | rs62310772 | rs62348873 | rs62375550 | rs62400860 | rs62434111 |
| rs62238493 | rs62259475 | rs62273237 | rs62310803 | rs62348889 | rs62378014 | rs62401155 | rs62434120 |
| rs62238588 | rs62259531 | rs62273875 | rs62310934 | rs62348895 | rs62378044 | rs62401198 | rs62434122 |
| rs62238685 | rs62259687 | rs62274041 | rs62311678 | rs6235     | rs62378245 | rs62402013 | rs62434123 |
| rs62239920 | rs62259692 | rs62275345 | rs62312418 | rs62351910 | rs62378355 | rs62403864 | rs62434129 |
| rs6224     | rs62259756 | rs62275802 | rs62313897 | rs62351974 | rs62378712 | rs62403867 | rs62435144 |
| rs62240962 | rs62259757 | rs62275807 | rs62314881 | rs62353264 | rs62379271 | rs62404084 | rs62435145 |
| rs62241190 | rs62259941 | rs62275836 | rs62316310 | rs62353354 | rs62379371 | rs62404182 | rs62435692 |
| rs62241216 | rs62260125 | rs62276459 | rs62319005 | rs62353586 | rs62379379 | rs62404667 | rs62435771 |
| rs62241772 | rs62260717 | rs62276616 | rs62319742 | rs62355272 | rs62379838 | rs62404966 | rs62436127 |
| rs62242404 | rs62260729 | rs62277117 | rs62321667 | rs62355615 | rs62379939 | rs62404993 | rs62436821 |
| rs62242542 | rs62260755 | rs62277680 | rs62321692 | rs62355667 | rs62379978 | rs62404994 | rs62436827 |
| rs62242983 | rs62260764 | rs62277889 | rs62321845 | rs62355901 | rs62380354 | rs62405419 | rs62437588 |
| rs62243190 | rs62260771 | rs62278010 | rs62322662 | rs62355902 | rs62380364 | rs62405458 | rs62438514 |
| rs62244186 | rs62260788 | rs62278294 | rs62322696 | rs62357862 | rs62380867 | rs62405954 | rs62439688 |
| rs62244773 | rs62260798 | rs62279162 | rs62323189 | rs62357886 | rs62381364 | rs62406226 | rs62439690 |
| rs62244840 | rs62260803 | rs62281815 | rs62323564 | rs62358087 | rs62381574 | rs62406467 | rs62440901 |
| rs62244881 | rs622614   | rs62282002 | rs62323682 | rs62358361 | rs62381644 | rs62407923 | rs62441680 |
| rs62244890 | rs62261468 | rs62282029 | rs62323881 | rs62358364 | rs62381975 | rs62407927 | rs62441842 |
| rs62245195 | rs62261476 | rs62282070 | rs62324212 | rs62358931 | rs62382095 | rs62408211 | rs62441903 |
| rs62245492 | rs62261477 | rs62282371 | rs62325149 | rs62359317 | rs62383308 | rs62408224 | rs62442203 |
| rs62246017 | rs62261481 | rs62283814 | rs62325464 | rs62360185 | rs62383728 | rs62408225 | rs62442206 |
| rs62246129 | rs62261502 | rs62284572 | rs62327181 | rs62360696 | rs62383977 | rs62408233 | rs62442919 |
| rs62246311 | rs62261676 | rs62286563 | rs62327604 | rs62360742 | rs62384625 | rs62409395 | rs62442924 |
| rs62246320 | rs62261725 | rs622871   | rs62327949 | rs62361303 | rs62385260 | rs62409631 | rs62444881 |
| rs62246343 | rs62261746 | rs62289340 | rs62327954 | rs62361338 | rs62385385 | rs62410363 | rs62444886 |
| rs62246406 | rs62261974 | rs62289359 | rs62328145 | rs62361682 | rs62385430 | rs62410535 | rs62444919 |
| rs62246443 | rs62262084 | rs62289742 | rs62328297 | rs62362194 | rs62385438 | rs62410539 | rs62445347 |
| rs62246445 | rs62262091 | rs62290561 | rs62328649 | rs62362865 | rs62385501 | rs62411494 | rs62445864 |
| rs62246446 | rs62262093 | rs62291089 | rs62329239 | rs62363475 | rs62386479 | rs62412107 | rs62446306 |
| rs62247124 | rs62262097 | rs62291612 | rs62329718 | rs62364658 | rs62386966 | rs62415384 | rs62446652 |
| rs62247166 | rs62262139 | rs62291616 | rs62329992 | rs62364881 | rs62387565 | rs62415384 | rs62447171 |
| rs62247449 | rs62262140 | rs62292620 | rs62330027 | rs62365447 | rs62387716 | rs62416186 | rs62447179 |
| rs62247658 | rs62262269 | rs62292788 | rs62330329 | rs62365472 | rs62387962 | rs62417597 | rs62447197 |
| rs62249739 | rs62262391 | rs62292950 | rs62331124 | rs62365476 | rs62388754 | rs62419196 | rs62447205 |
| rs62250491 | rs62262463 | rs62292953 | rs62331150 | rs62366190 | rs62389289 | rs62419609 | rs62447870 |
| rs62250661 | rs62262466 | rs62293987 | rs62332388 | rs62366215 | rs62389423 | rs62420383 | rs62448888 |
| rs62250685 | rs62262670 | rs62294148 | rs62332760 | rs62366963 | rs62389424 | rs62420387 | rs62448923 |
| rs62250713 | rs62262671 | rs62294340 | rs62333164 | rs62367520 | rs62389532 | rs62420820 | rs62449144 |
| rs62250714 | rs62262721 | rs62295801 | rs62334097 | rs62367585 | rs62390189 | rs62422450 | rs62449208 |
| rs62250759 | rs62263023 | rs62295996 | rs62334289 | rs62367903 | rs62390615 | rs62422590 | rs62449458 |
| rs62250976 | rs62263033 | rs62296577 | rs62334584 | rs62368123 | rs62390617 | rs62422686 | rs62450572 |
| rs62251088 | rs62263343 | rs62299452 | rs62334702 | rs62368126 | rs62391270 | rs62422687 | rs62450857 |
| rs622513   | rs62263597 | rs62299775 | rs62334742 | rs62368272 | rs62391342 | rs62422846 | rs62451586 |
| rs62251475 | rs62263809 | rs623011   | rs62334820 | rs62368409 | rs62391624 | rs62422907 | rs62452060 |
| rs62252216 | rs62263923 | rs62301574 | rs62335202 | rs62368993 | rs62391629 | rs62423175 | rs62452204 |
| rs62252239 | rs62263995 | rs62302171 | rs62336287 | rs62369123 | rs62392365 | rs624244   | rs62452720 |
| rs62252819 | rs62264129 | rs62302224 | rs62337555 | rs62369484 | rs62393575 | rs62424430 | rs62452901 |
| rs62253085 | rs62264764 | rs62302300 | rs62338910 | rs62369524 | rs62394296 | rs62424499 | rs62453057 |
| rs62253086 | rs62264767 | rs62302396 | rs62339710 | rs62369630 | rs62394490 | rs62425398 | rs62454414 |
| rs62253088 | rs62264957 | rs623025   | rs62339861 | rs62369631 | rs62395421 | rs62425620 | rs62454415 |
| rs62253383 | rs62265318 | rs62303689 | rs6234     | rs62369897 | rs62396185 | rs62427108 | rs62454419 |
| rs62253608 | rs62266110 | rs62304437 | rs62340589 | rs62369913 | rs62396201 | rs62427469 | rs62454420 |
| rs62253653 | rs62266700 | rs62305038 | rs62340636 | rs62370277 | rs62396317 | rs62427471 | rs62454712 |
| rs62253764 | rs62266958 | rs62305780 | rs62340877 | rs62370472 | rs62396356 | rs62427705 | rs62457261 |
| rs62255389 | rs62267569 | rs62305782 | rs62341097 | rs62370480 | rs62396719 | rs62427982 | rs62457627 |
| rs62255926 | rs62267570 | rs62306379 | rs62341872 | rs62370510 | rs62396733 | rs62427983 | rs62459095 |

|            |            |            |            |            |            |           |           |
|------------|------------|------------|------------|------------|------------|-----------|-----------|
| rs62459989 | rs62496903 | rs62544286 | rs62620225 | rs632111   | rs639652   | rs6425522 | rs6433478 |
| rs62460713 | rs624988   | rs62545082 | rs62621197 | rs632180   | rs639933   | rs6425999 | rs6433563 |
| rs62460794 | rs62500888 | rs62547238 | rs62621400 | rs632251   | rs640065   | rs6426328 | rs6433618 |
| rs62461297 | rs62501032 | rs62549698 | rs62621409 | rs632478   | rs640177   | rs6426558 | rs6433657 |
| rs62462473 | rs62501136 | rs62550480 | rs62621812 | rs632672   | rs640245   | rs6426658 | rs643381  |
| rs62462685 | rs62501195 | rs62550819 | rs62623446 | rs632811   | rs640345   | rs6426749 | rs6433847 |
| rs62462737 | rs62501779 | rs62550974 | rs62623707 | rs632887   | rs640396   | rs6426786 | rs6433895 |
| rs62464139 | rs62503281 | rs62550975 | rs62623713 | rs632964   | rs64070588 | rs6426833 | rs6433901 |
| rs62465218 | rs62503282 | rs62551476 | rs62625030 | rs63303162 | rs641153   | rs6426893 | rs6433921 |
| rs62465642 | rs62504693 | rs62551581 | rs62625034 | rs633059   | rs641162   | rs6426912 | rs6433994 |
| rs62466110 | rs62505473 | rs62551583 | rs62626322 | rs633153   | rs641325   | rs6426985 | rs6434068 |
| rs62466318 | rs62506039 | rs62551586 | rs626277   | rs633185   | rs6414859  | rs6427082 | rs643428  |
| rs62466330 | rs62506074 | rs62551639 | rs626283   | rs633279   | rs6414946  | rs6427196 | rs643434  |
| rs62467106 | rs62506104 | rs62552211 | rs62639548 | rs633284   | rs6414971  | rs6427401 | rs6434390 |
| rs62468101 | rs62506196 | rs62552898 | rs626416   | rs633323   | rs6415084  | rs6427440 | rs6434404 |
| rs62468583 | rs62507083 | rs62553458 | rs62641636 | rs633389   | rs6415133  | rs6427499 | rs6434426 |
| rs62468774 | rs62508223 | rs62553781 | rs62641786 | rs63340160 | rs6415571  | rs6427540 | rs643472  |
| rs62469016 | rs62508246 | rs62553882 | rs626457   | rs633417   | rs641574   | rs6427615 | rs6434928 |
| rs62470182 | rs62509329 | rs62553886 | rs6265     | rs633695   | rs6415788  | rs6427756 | rs6434978 |
| rs62470670 | rs62510269 | rs62555197 | rs62651713 | rs633715   | rs6415912  | rs6427847 | rs6435048 |
| rs62471080 | rs62510270 | rs62555664 | rs62654723 | rs633724   | rs6415968  | rs642803  | rs643507  |
| rs62471615 | rs62511286 | rs62557312 | rs626750   | rs633798   | rs6416054  | rs6428587 | rs6435149 |
| rs62471956 | rs62512210 | rs62558340 | rs626776   | rs633891   | rs6416056  | rs6428601 | rs6435161 |
| rs62472014 | rs62512472 | rs62558837 | rs627055   | rs6339     | rs6416749  | rs6428637 | rs643531  |
| rs62472627 | rs62513191 | rs62558978 | rs6271     | rs633918   | rs6416877  | rs6428789 | rs6435326 |
| rs62472985 | rs625132   | rs62560774 | rs627527   | rs633995   | rs6417048  | rs6428947 | rs6435378 |
| rs62473520 | rs62515079 | rs62560775 | rs627634   | rs63406760 | rs641738   | rs6429082 | rs6435622 |
| rs62473589 | rs62515375 | rs62561562 | rs627804   | rs634138   | rs6418     | rs6429233 | rs6435862 |
| rs62475038 | rs62515408 | rs62562580 | rs628205   | rs63418562 | rs641811   | rs6429422 | rs6435952 |
| rs62476192 | rs62515430 | rs62565259 | rs628246   | rs634277   | rs641937   | rs6429432 | rs6435953 |
| rs62477649 | rs62515432 | rs62567129 | rs628401   | rs634454   | rs6419573  | rs642950  | rs6436017 |
| rs62477685 | rs62515452 | rs62568141 | rs62859560 | rs634534   | rs6419734  | rs6429637 | rs6436555 |
| rs62478245 | rs62515696 | rs62569223 | rs628751   | rs634537   | rs6420041  | rs6429911 | rs6436755 |
| rs62478615 | rs62515938 | rs62569480 | rs62875162 | rs634552   | rs6420094  | rs6429912 | rs643684  |
| rs62479657 | rs62516012 | rs62569723 | rs628993   | rs634683   | rs6420181  | rs6430030 | rs6437001 |
| rs62479736 | rs625172   | rs62570303 | rs629042   | rs634687   | rs6420484  | rs6430070 | rs6437061 |
| rs62481856 | rs62517932 | rs62571018 | rs629241   | rs634869   | rs6420694  | rs6430090 | rs6437097 |
| rs62482241 | rs62519827 | rs62571883 | rs629301   | rs634990   | rs6421315  | rs6430095 | rs6437219 |
| rs62482253 | rs62519839 | rs62572328 | rs629444   | rs635594   | rs6421389  | rs6430286 | rs6437234 |
| rs62482639 | rs62519841 | rs62573099 | rs629535   | rs635634   | rs6421437  | rs6430491 | rs6437556 |
| rs624833   | rs62520182 | rs62573167 | rs629619   | rs635754   | rs6421482  | rs6430538 | rs6437582 |
| rs62483572 | rs62520259 | rs62574179 | rs629631   | rs636089   | rs6421571  | rs6430549 | rs6437769 |
| rs62483591 | rs62520913 | rs62574201 | rs6297     | rs636261   | rs6421572  | rs6430553 | rs643788  |
| rs62483627 | rs62520914 | rs62574330 | rs629710   | rs636291   | rs6421896  | rs6430597 | rs6437923 |
| rs62484026 | rs62521286 | rs62575014 | rs629725   | rs63629260 | rs6421926  | rs6430954 | rs6438208 |
| rs62485509 | rs62521287 | rs62575992 | rs629849   | rs636402   | rs6421984  | rs6431539 | rs6438214 |
| rs62485905 | rs625228   | rs62576695 | rs630104   | rs636406   | rs6422323  | rs6431620 | rs6438247 |
| rs62486442 | rs62523388 | rs62578082 | rs630372   | rs636487   | rs6422324  | rs6431630 | rs6438253 |
| rs62487041 | rs62523770 | rs62578127 | rs630505   | rs63658260 | rs6422513  | rs6431731 | rs6438424 |
| rs62489376 | rs62524579 | rs62578989 | rs630510   | rs636918   | rs6423287  | rs643177  | rs6438432 |
| rs62489382 | rs62524650 | rs62579839 | rs630539   | rs637064   | rs6424070  | rs6432054 | rs6438436 |
| rs62491176 | rs62524728 | rs6258     | rs630602   | rs637137   | rs6424109  | rs6432169 | rs643884  |
| rs62491261 | rs62524935 | rs62580766 | rs630707   | rs637174   | rs6424115  | rs6432244 | rs6438869 |
| rs62491264 | rs62525059 | rs62580791 | rs630923   | rs637551   | rs6424378  | rs6432327 | rs6438900 |
| rs62491302 | rs62525616 | rs62581402 | rs630965   | rs637571   | rs6424532  | rs6432335 | rs643908  |
| rs62491354 | rs62526122 | rs62585312 | rs631126   | rs637716   | rs6424881  | rs6432613 | rs6439167 |
| rs62491385 | rs62526783 | rs625882   | rs631130   | rs638138   | rs6424971  | rs6432622 | rs6439168 |
| rs62491456 | rs62530285 | rs6259     | rs631140   | rs638372   | rs6425143  | rs6432627 | rs6439371 |
| rs62491533 | rs62530366 | rs62590551 | rs631204   | rs638542   | rs6425194  | rs6432686 | rs6439629 |
| rs62491812 | rs62532649 | rs62604342 | rs631276   | rs638634   | rs6425280  | rs6432708 | rs6439649 |
| rs62491814 | rs62535711 | rs62605968 | rs631287   | rs638640   | rs6425302  | rs6432860 | rs6439675 |
| rs62492076 | rs62535725 | rs62606711 | rs631399   | rs638714   | rs6425305  | rs6432877 | rs6439699 |
| rs62492368 | rs62535767 | rs626096   | rs631462   | rs638722   | rs6425386  | rs643319  | rs6439701 |
| rs62492465 | rs62536931 | rs62609610 | rs631695   | rs638893   | rs6425393  | rs6433219 | rs6439846 |
| rs62493780 | rs62538956 | rs62617115 | rs631864   | rs638907   | rs6425501  | rs6433243 | rs6440003 |
| rs62494425 | rs62539060 | rs62618693 | rs632057   | rs639016   | rs6425517  | rs6433282 | rs6440006 |
| rs62496810 | rs62541534 | rs62618742 | rs632087   | rs63934    | rs6425521  | rs6433457 | rs6440008 |

|           |           |           |           |           |           |           |           |
|-----------|-----------|-----------|-----------|-----------|-----------|-----------|-----------|
| rs6440076 | rs6445258 | rs6452787 | rs6459472 | rs6465876 | rs6473227 | rs6480708 | rs6489867 |
| rs6440088 | rs6445264 | rs6452788 | rs6459480 | rs6466055 | rs6473228 | rs6480713 | rs6489953 |
| rs6440091 | rs6445393 | rs6452791 | rs6459650 | rs6466171 | rs6473252 | rs6480769 | rs648997  |
| rs6440123 | rs6445424 | rs6452792 | rs6459680 | rs6466198 | rs6473736 | rs6480771 | rs6489973 |
| rs6440132 | rs6445487 | rs6452793 | rs6459689 | rs6466499 | rs6474359 | rs6480836 | rs6490030 |
| rs644045  | rs6445538 | rs6452920 | rs6459733 | rs6466819 | rs6474401 | rs648090  | rs6490061 |
| rs6440526 | rs6445541 | rs6452921 | rs6459818 | rs646695  | rs6474412 | rs6480914 | rs649009  |
| rs6440666 | rs6445559 | rs6453167 | rs6460047 | rs646698  | rs6474609 | rs6481128 | rs6490117 |
| rs6440667 | rs6445597 | rs6453213 | rs6460094 | rs6467136 | rs6474945 | rs6481183 | rs6490177 |
| rs6440732 | rs6445607 | rs6453287 | rs6460528 | rs6467145 | rs6474966 | rs6481598 | rs6490294 |
| rs6440833 | rs6445633 | rs6453383 | rs6460661 | rs6467157 | rs6475130 | rs648163  | rs6490618 |
| rs6440859 | rs6445804 | rs6453397 | rs6460895 | rs6467366 | rs6475448 | rs648193  | rs649129  |
| rs6441103 | rs6445817 | rs6453400 | rs6460944 | rs6467447 | rs6475604 | rs6481946 | rs649216  |
| rs6441111 | rs6445818 | rs6453429 | rs6461049 | rs6467482 | rs6475606 | rs648196  | rs6492519 |
| rs6441175 | rs6445821 | rs6453610 | rs6461187 | rs6467512 | rs6475611 | rs6482144 | rs6492538 |
| rs6441201 | rs6445826 | rs6453700 | rs646123  | rs6467551 | rs6475938 | rs6482189 | rs6492539 |
| rs6441207 | rs6445857 | rs645402  | rs6461309 | rs6467589 | rs6476086 | rs6482190 | rs6492711 |
| rs6441263 | rs644592  | rs6454092 | rs6461314 | rs6467595 | rs6476434 | rs6482384 | rs6492721 |
| rs6441286 | rs6445927 | rs645419  | rs6461337 | rs646776  | rs6476459 | rs6482443 | rs6492772 |
| rs6441364 | rs6445932 | rs6454314 | rs6461354 | rs6467885 | rs6476491 | rs648324  | rs6492848 |
| rs6441963 | rs6445967 | rs6454582 | rs6461386 | rs646809  | rs6476606 | rs6483414 | rs6492870 |
| rs6441978 | rs6445969 | rs6454589 | rs6461387 | rs6468316 | rs6476617 | rs6483416 | rs6492956 |
| rs6441996 | rs6445975 | rs6454596 | rs6461503 | rs6468341 | rs6476827 | rs6483656 | rs6492982 |
| rs644205  | rs6446187 | rs6454805 | rs6461532 | rs6468342 | rs6476839 | rs6484218 | rs6493265 |
| rs6442061 | rs6446204 | rs6455847 | rs6461536 | rs6469603 | rs6477309 | rs6484292 | rs6493271 |
| rs6442101 | rs6446298 | rs645592  | rs6461564 | rs6469605 | rs6477314 | rs6484385 | rs6493275 |
| rs6442112 | rs6446312 | rs645601  | rs646157  | rs6469606 | rs6477489 | rs6484437 | rs6493325 |
| rs6442126 | rs6446315 | rs6456182 | rs6461667 | rs6469654 | rs6477493 | rs6484504 | rs6493498 |
| rs644219  | rs6446592 | rs6456198 | rs6461703 | rs6469656 | rs6477496 | rs6485443 | rs6493544 |
| rs6442241 | rs6446685 | rs6456350 | rs646179  | rs6469787 | rs6477545 | rs6485486 | rs6493575 |
| rs6442310 | rs6446731 | rs6456379 | rs6461809 | rs6469804 | rs6477547 | rs6485702 | rs6494005 |
| rs644234  | rs6446959 | rs6456420 | rs6461932 | rs6469811 | rs647758  | rs6485751 | rs6494314 |
| rs6442382 | rs6447132 | rs6456496 | rs6461992 | rs646993  | rs6477694 | rs6485978 | rs6494407 |
| rs6442411 | rs6447335 | rs6456499 | rs6462078 | rs6469937 | rs6477734 | rs6486060 | rs6494488 |
| rs6442433 | rs644740  | rs645662  | rs6462079 | rs6470159 | rs6477768 | rs6486116 | rs6494533 |
| rs6442537 | rs644778  | rs6456785 | rs6462899 | rs6470361 | rs6477879 | rs6486121 | rs6494537 |
| rs6442647 | rs644799  | rs645692  | rs6462932 | rs6470578 | rs6478106 | rs6486122 | rs6494597 |
| rs6442652 | rs6448429 | rs6457327 | rs6462989 | rs6470697 | rs6478108 | rs6486245 | rs6494598 |
| rs644279  | rs6448451 | rs6457374 | rs646299  | rs6470763 | rs6478109 | rs6486406 | rs649472  |
| rs6443429 | rs6448453 | rs6457617 | rs6462990 | rs6470764 | rs6478241 | rs6486542 | rs6495017 |
| rs6443431 | rs6448771 | rs6457620 | rs6463311 | rs6470765 | rs6478343 | rs6486599 | rs6495046 |
| rs6443703 | rs6448862 | rs6457710 | rs6463483 | rs6470787 | rs6478484 | rs648674  | rs6495117 |
| rs6443750 | rs6449133 | rs6457796 | rs6463485 | rs647080  | rs6478522 | rs6487088 | rs6495122 |
| rs6443788 | rs6449213 | rs6457807 | rs6463489 | rs6470797 | rs6478538 | rs6487108 | rs6495127 |
| rs6443802 | rs6449353 | rs6457808 | rs6463490 | rs6471099 | rs6478585 | rs6487531 | rs6495128 |
| rs6443810 | rs6449502 | rs6457809 | rs6464024 | rs6471291 | rs6478623 | rs6487543 | rs6495182 |
| rs6443925 | rs6449503 | rs6457821 | rs6464114 | rs6471325 | rs6478746 | rs6487544 | rs6495287 |
| rs6443959 | rs6449532 | rs6457834 | rs6464165 | rs647137  | rs6478750 | rs6488099 | rs6495309 |
| rs6444121 | rs6449533 | rs6457867 | rs6464530 | rs6471583 | rs6478868 | rs6488162 | rs6495335 |
| rs6444305 | rs6449674 | rs6457931 | rs6464921 | rs647161  | rs6479003 | rs648831  | rs6495367 |
| rs6444307 | rs6449774 | rs6457977 | rs6465120 | rs6471717 | rs6479005 | rs6488336 | rs649540  |
| rs6444442 | rs6450176 | rs6457996 | rs6465151 | rs6471752 | rs6479259 | rs6488345 | rs6495841 |
| rs6444444 | rs645026  | rs6458011 | rs6465351 | rs6471814 | rs6479336 | rs6488561 | rs6495962 |
| rs6444447 | rs645040  | rs6458331 | rs6465353 | rs6471932 | rs6479494 | rs6488868 | rs6496086 |
| rs6444471 | rs6450476 | rs6458349 | rs6465468 | rs6472208 | rs6479579 | rs6488898 | rs6496127 |
| rs6444571 | rs645078  | rs6458354 | rs6465508 | rs6472232 | rs6479591 | rs6488904 | rs6496140 |
| rs6444746 | rs6450922 | rs6458375 | rs6465510 | rs6472235 | rs6479631 | rs6489111 | rs6496284 |
| rs6444749 | rs6451032 | rs6458443 | rs6465511 | rs6472241 | rs6479800 | rs6489156 | rs6496452 |
| rs6444790 | rs6451076 | rs6458545 | rs6465515 | rs6472530 | rs6479828 | rs6489319 | rs6496519 |
| rs6444895 | rs6451229 | rs6458867 | rs6465607 | rs6472812 | rs6479841 | rs6489536 | rs6496586 |
| rs644492  | rs6451493 | rs6458868 | rs6465641 | rs6472873 | rs6479877 | rs6489548 | rs6496663 |
| rs6444974 | rs6451575 | rs6458869 | rs6465657 | rs6472903 | rs6479901 | rs6489568 | rs6496676 |
| rs6445035 | rs6451675 | rs645901  | rs6465658 | rs6472936 | rs6479908 | rs6489695 | rs6496691 |
| rs6445046 | rs6452497 | rs6459098 | rs6465732 | rs6472942 | rs6480234 | rs6489698 | rs6496733 |
| rs6445054 | rs6452541 | rs645935  | rs6465750 | rs6473008 | rs6480299 | rs6489734 | rs649693  |
| rs6445055 | rs6452784 | rs6459450 | rs6465773 | rs6473015 | rs648044  | rs6489785 | rs6496932 |
| rs6445198 | rs6452785 | rs6459467 | rs6465825 | rs647316  | rs6480627 | rs6489786 | rs6497006 |

|           |           |           |           |           |           |           |           |
|-----------|-----------|-----------|-----------|-----------|-----------|-----------|-----------|
| rs6497029 | rs6503513 | rs6511291 | rs6533515 | rs6541349 | rs6546620 | rs655627  | rs6562760 |
| rs649729  | rs6503533 | rs651164  | rs6533694 | rs654169  | rs6546647 | rs6556301 | rs6563164 |
| rs6497337 | rs6503659 | rs6511703 | rs6533976 | rs6541988 | rs6546838 | rs6556313 | rs656319  |
| rs6497339 | rs6503695 | rs6511720 | rs6534338 | rs6542107 | rs6546847 | rs6556314 | rs6563199 |
| rs6497451 | rs6503863 | rs6511721 | rs653444  | rs6542368 | rs6546856 | rs6556349 | rs6563739 |
| rs6497490 | rs6503905 | rs6511761 | rs653465  | rs6542457 | rs6546857 | rs6556350 | rs6563812 |
| rs649775  | rs6504021 | rs6511826 | rs6535362 | rs6542479 | rs6546861 | rs6556405 | rs6563831 |
| rs6497840 | rs6504074 | rs6512023 | rs6535419 | rs6542680 | rs6546869 | rs655641  | rs6563842 |
| rs6498021 | rs6504108 | rs6512104 | rs6535445 | rs6542772 | rs6546881 | rs6556411 | rs6564524 |
| rs6498114 | rs6504163 | rs6512119 | rs6535524 | rs6542886 | rs6546909 | rs6556412 | rs6564537 |
| rs6498168 | rs6504179 | rs6512302 | rs6535577 | rs6542920 | rs6546917 | rs6556416 | rs6564681 |
| rs6498169 | rs6504213 | rs651245  | rs6535594 | rs6542924 | rs654698  | rs6556471 | rs6564851 |
| rs6498184 | rs6504249 | rs6512645 | rs6535628 | rs6542930 | rs654723  | rs6556482 | rs6564890 |
| rs6498239 | rs6504487 | rs651381  | rs6535703 | rs6543004 | rs6547257 | rs6556803 | rs6564982 |
| rs6498271 | rs6504568 | rs651386  | rs6535803 | rs6543087 | rs6547599 | rs6556925 | rs6565    |
| rs6498540 | rs6504675 | rs651413  | rs6535809 | rs6543094 | rs6547617 | rs6556937 | rs6565060 |
| rs649870  | rs6504758 | rs6514131 | rs6535972 | rs6543119 | rs6547631 | rs6556982 | rs6565174 |
| rs6499102 | rs6504950 | rs6515236 | rs6536024 | rs6543124 | rs6547638 | rs6557155 | rs6565176 |
| rs6499129 | rs6505057 | rs651529  | rs6536076 | rs6543134 | rs6547692 | rs6557160 | rs656521  |
| rs6499165 | rs6505079 | rs651533  | rs6536088 | rs6543140 | rs6547705 | rs6557168 | rs6565564 |
| rs6499186 | rs6505095 | rs651548  | rs6536575 | rs6543682 | rs6547741 | rs6557171 | rs6565586 |
| rs6499188 | rs6505129 | rs6515865 | rs6537255 | rs6543726 | rs6547870 | rs655720  | rs6565597 |
| rs6499240 | rs6505191 | rs651636  | rs6537279 | rs6543810 | rs6547872 | rs6557435 | rs6565681 |
| rs6499244 | rs6505211 | rs6517101 | rs6537283 | rs6543913 | rs6548237 | rs6557602 | rs6565887 |
| rs6499255 | rs6505239 | rs6517271 | rs6537291 | rs6544006 | rs6548238 | rs6557617 | rs6565922 |
| rs6499330 | rs6505274 | rs6517522 | rs6537292 | rs6544171 | rs6548565 | rs6557643 | rs6566169 |
| rs6499550 | rs650543  | rs6517656 | rs6537293 | rs6544311 | rs6548566 | rs6557662 | rs6566233 |
| rs6499595 | rs650558  | rs651797  | rs6537294 | rs6544325 | rs6548600 | rs6557705 | rs6567157 |
| rs649961  | rs6505765 | rs651821  | rs6537296 | rs6544366 | rs6548834 | rs6557781 | rs6567160 |
| rs6499640 | rs6505987 | rs651858  | rs6537298 | rs6544602 | rs6549007 | rs6557839 | rs6567230 |
| rs6499755 | rs6506015 | rs6518661 | rs6537307 | rs6544633 | rs6549043 | rs6557876 | rs6567282 |
| rs6499762 | rs6506033 | rs6518681 | rs6537315 | rs6544650 | rs6549048 | rs6558158 | rs6567288 |
| rs6499821 | rs6506519 | rs6518723 | rs6537335 | rs6544713 | rs6549112 | rs6558173 | rs6567329 |
| rs6500208 | rs6506537 | rs6518724 | rs6537356 | rs6544743 | rs654912  | rs6558295 | rs6567508 |
| rs6500257 | rs6507054 | rs651902  | rs6537747 | rs6544906 | rs6549120 | rs6558318 | rs6568401 |
| rs6500328 | rs6507583 | rs6519133 | rs6537825 | rs6545135 | rs6549447 | rs655836  | rs656841  |
| rs6500380 | rs6507603 | rs6519227 | rs6538148 | rs6545155 | rs6549455 | rs6559493 | rs6568421 |
| rs6500458 | rs6507676 | rs6519240 | rs6538223 | rs6545169 | rs6549649 | rs6559505 | rs6568431 |
| rs6500493 | rs6507681 | rs651973  | rs6538292 | rs654537  | rs6549653 | rs6559561 | rs6568466 |
| rs6500550 | rs6507690 | rs6519955 | rs6538437 | rs6545440 | rs6549962 | rs6559648 | rs6568490 |
| rs6500596 | rs6507691 | rs6521    | rs6538452 | rs6545465 | rs6550067 | rs6559744 | rs6568547 |
| rs6500601 | rs6507716 | rs652260  | rs6538487 | rs6545559 | rs6550259 | rs6559921 | rs6568554 |
| rs6500768 | rs6507720 | rs6525433 | rs6538505 | rs6545714 | rs655029  | rs6559998 | rs6568570 |
| rs6500948 | rs6507874 | rs652673  | rs6538805 | rs6545765 | rs655040  | rs6560135 | rs6568571 |
| rs6500957 | rs6507939 | rs6528024 | rs6539018 | rs6545798 | rs6550435 | rs6560155 | rs6568600 |
| rs6500960 | rs6508210 | rs652888  | rs6539064 | rs6545799 | rs6550512 | rs6560168 | rs6568686 |
| rs6501199 | rs6508220 | rs6529684 | rs6539284 | rs6545800 | rs6550597 | rs6560203 | rs6568832 |
| rs6501207 | rs6508230 | rs6530737 | rs6539288 | rs6545814 | rs6550653 | rs6560218 | rs6569077 |
| rs6501250 | rs6508355 | rs6531216 | rs6539344 | rs6545817 | rs6550775 | rs6560353 | rs6569095 |
| rs6501383 | rs6509089 | rs6531656 | rs6539353 | rs6545836 | rs6550835 | rs6560499 | rs6569474 |
| rs6501431 | rs6509155 | rs6531663 | rs6539569 | rs6545946 | rs6551412 | rs6560581 | rs6569475 |
| rs6501455 | rs6509222 | rs653170  | rs653958  | rs6545966 | rs6551716 | rs6560886 | rs6569647 |
| rs6501468 | rs6509244 | rs6531714 | rs6539952 | rs6545975 | rs6553899 | rs6560906 | rs6569648 |
| rs6501801 | rs6509441 | rs6531735 | rs6540125 | rs6545977 | rs6554054 | rs6560957 | rs6569725 |
| rs650198  | rs6509525 | rs653178  | rs6540234 | rs654600  | rs6554074 | rs656105  | rs6569914 |
| rs6502026 | rs6509558 | rs6531971 | rs6540498 | rs6546096 | rs6554107 | rs6561151 | rs6569992 |
| rs6502555 | rs651007  | rs6532023 | rs6540549 | rs6546120 | rs6554158 | rs6561273 | rs6569999 |
| rs650258  | rs6510186 | rs6532194 | rs6540555 | rs6546149 | rs6554196 | rs656131  | rs6570048 |
| rs6502608 | rs6510338 | rs653264  | rs6540556 | rs6546164 | rs655433  | rs6561333 | rs6570053 |
| rs6502738 | rs6510374 | rs6532795 | rs6540559 | rs6546230 | rs655484  | rs6561599 | rs6570101 |
| rs6503091 | rs6510834 | rs6532796 | rs6540565 | rs6546232 | rs6555317 | rs6561643 | rs6570109 |
| rs6503094 | rs6510866 | rs6532835 | rs6540578 | rs654629  | rs6555820 | rs6561715 | rs6570351 |
| rs6503102 | rs6510982 | rs6533052 | rs6540718 | rs6546324 | rs6555855 | rs6561766 | rs657036  |
| rs6503409 | rs6511027 | rs6533181 | rs6540754 | rs6546334 | rs6555999 | rs6561937 | rs6570497 |
| rs6503413 | rs6511046 | rs6533183 | rs6540873 | rs6546486 | rs6556059 | rs6561938 | rs6570507 |
| rs6503453 | rs6511268 | rs6533185 | rs6540943 | rs6546550 | rs6556079 | rs6562066 | rs6570508 |
| rs6503492 | rs6511285 | rs6533483 | rs6541006 | rs6546553 | rs655613  | rs6562474 | rs6570509 |

|           |           |           |           |           |            |            |            |
|-----------|-----------|-----------|-----------|-----------|------------|------------|------------|
| rs6570726 | rs6578125 | rs6586282 | rs6592965 | rs6599255 | rs6609273  | rs66466742 | rs66532914 |
| rs657075  | rs6578583 | rs6586877 | rs6593005 | rs6599388 | rs660931   | rs66467147 | rs66533066 |
| rs657086  | rs6578598 | rs6586891 | rs6593086 | rs6599389 | rs661054   | rs664677   | rs66533425 |
| rs6570952 | rs6579245 | rs658710  | rs6593297 | rs6599636 | rs6610546  | rs66468814 | rs66534072 |
| rs6571017 | rs6579789 | rs6587216 | rs6593412 | rs6599694 | rs661126   | rs66468848 | rs66534382 |
| rs6571252 | rs6579837 | rs6587444 | rs6593680 | rs660001  | rs661171   | rs6647     | rs66535358 |
| rs657152  | rs6579956 | rs6587515 | rs6593920 | rs660010  | rs661348   | rs66470941 | rs66538782 |
| rs657187  | rs6580046 | rs6587520 | rs6593924 | rs6600191 | rs661527   | rs66473811 | rs665401   |
| rs6571939 | rs6580083 | rs6587551 | rs6593925 | rs6600233 | rs6616174  | rs66474919 | rs665440   |
| rs6572807 | rs6580200 | rs6587552 | rs659398  | rs6600238 | rs6618677  | rs66476925 | rs6655282  |
| rs6572878 | rs6580224 | rs6587553 | rs6594001 | rs6600247 | rs661878   | rs6647951  | rs66559683 |
| rs6572975 | rs6580229 | rs6587640 | rs659418  | rs6600257 | rs661882   | rs66479618 | rs6656067  |
| rs6572992 | rs6580277 | rs6587924 | rs6594319 | rs6600365 | rs661955   | rs66479974 | rs6656070  |
| rs6573020 | rs6580502 | rs6587980 | rs659437  | rs6601080 | rs661960   | rs66480687 | rs66561220 |
| rs6573037 | rs6580586 | rs6588156 | rs6594499 | rs6601211 | rs662      | rs66481224 | rs66561647 |
| rs6573040 | rs6580698 | rs6588216 | rs6594500 | rs6601295 | rs662026   | rs66481714 | rs6656199  |
| rs6573197 | rs6580721 | rs658839  | rs659457  | rs6601296 | rs662064   | rs66482320 | rs66563455 |
| rs6573307 | rs6581138 | rs6588396 | rs6594669 | rs6601299 | rs662094   | rs66483545 | rs6656401  |
| rs6573308 | rs6581157 | rs6588417 | rs6594682 | rs6601426 | rs6621219  | rs664846   | rs6656457  |
| rs6573333 | rs658118  | rs6588608 | rs6595162 | rs6601430 | rs662138   | rs66486766 | rs6656611  |
| rs6573552 | rs6581243 | rs6588634 | rs659529  | rs6601450 | rs6622126  | rs66487676 | rs665674   |
| rs6573559 | rs6581526 | rs658912  | rs6595376 | rs6601451 | rs6622208  | rs66488313 | rs66567989 |
| rs6573568 | rs6581612 | rs6589219 | rs6595440 | rs6601508 | rs6624142  | rs66488607 | rs6656815  |
| rs6573604 | rs6581627 | rs6589229 | rs6595443 | rs6601527 | rs6625163  | rs6649     | rs6656857  |
| rs6573611 | rs6581635 | rs6589252 | rs6595447 | rs6601530 | rs6625711  | rs664918   | rs66568921 |
| rs6573626 | rs6581661 | rs6589301 | rs6595460 | rs6601641 | rs6625947  | rs66491909 | rs6656986  |
| rs6573662 | rs6581662 | rs6589377 | rs6595549 | rs6602301 | rs662602   | rs66492049 | rs6657049  |
| rs6573723 | rs6581793 | rs6589379 | rs6595714 | rs6602364 | rs6627226  | rs66492629 | rs665723   |
| rs6573725 | rs6581928 | rs6589386 | rs659580  | rs6602398 | rs662735   | rs66493370 | rs6657284  |
| rs6573778 | rs6582298 | rs6589488 | rs6595838 | rs660240  | rs6627558  | rs66495454 | rs665731   |
| rs6573817 | rs6582586 | rs6589563 | rs6595839 | rs6602411 | rs662799   | rs66499479 | rs66573146 |
| rs6573878 | rs6582618 | rs6589566 | rs6595968 | rs6602476 | rs6627995  | rs66499584 | rs6657442  |
| rs6573971 | rs6582623 | rs6589567 | rs6596    | rs6602666 | rs6628029  | rs66500121 | rs665751   |
| rs6574032 | rs6583203 | rs6589598 | rs6596086 | rs6602906 | rs6629562  | rs66500423 | rs6657613  |
| rs6574100 | rs6583291 | rs6589706 | rs6596100 | rs6602909 | rs6630     | rs6650164  | rs6657658  |
| rs6574349 | rs6583310 | rs658974  | rs6596147 | rs6602911 | rs663015   | rs66502159 | rs66576886 |
| rs6574405 | rs6583326 | rs6589750 | rs6596572 | rs6602912 | rs663045   | rs66504140 | rs6657798  |
| rs657452  | rs6583331 | rs658980  | rs6596669 | rs6602982 | rs663129   | rs66504755 | rs6657811  |
| rs6574652 | rs6583437 | rs6589939 | rs6596717 | rs6603134 | rs663234   | rs6650508  | rs665783   |
| rs657466  | rs658349  | rs658995  | rs6596771 | rs660340  | rs663237   | rs6650529  | rs6657854  |
| rs6574818 | rs658385  | rs6589961 | rs6596833 | rs6603785 | rs663251   | rs66505542 | rs6658111  |
| rs6575005 | rs6583866 | rs6589964 | rs6596834 | rs6603981 | rs6632893  | rs66507060 | rs6658232  |
| rs6575012 | rs6583939 | rs6589965 | rs6596978 | rs6603991 | rs6633421  | rs66507804 | rs6658330  |
| rs6575198 | rs6584192 | rs658997  | rs6597061 | rs6604    | rs663474   | rs6650791  | rs6658353  |
| rs6575242 | rs6584278 | rs6589988 | rs6597081 | rs6604015 | rs663497   | rs6650810  | rs6658424  |
| rs6575306 | rs6584283 | rs6590199 | rs6597236 | rs6604614 | rs663576   | rs66508963 | rs6658473  |
| rs6575340 | rs6584485 | rs6590207 | rs6597280 | rs6604683 | rs663599   | rs66509943 | rs6658555  |
| rs6575449 | rs6584542 | rs6590295 | rs6597371 | rs6604731 | rs663617   | rs66511648 | rs665857   |
| rs6575793 | rs6584608 | rs6590297 | rs6597649 | rs6604866 | rs663640   | rs6651252  | rs6658646  |
| rs6575803 | rs6584649 | rs6590330 | rs6597653 | rs6605    | rs663651   | rs6651255  | rs6658653  |
| rs6575806 | rs6585139 | rs6590334 | rs6597851 | rs660549  | rs663743   | rs66514959 | rs6658723  |
| rs6575858 | rs6585178 | rs6590459 | rs6597981 | rs660550  | rs6638512  | rs66515264 | rs6658835  |
| rs6575901 | rs6585201 | rs6590810 | rs6598008 | rs6606582 | rs663887   | rs66515460 | rs6658977  |
| rs6576006 | rs6585202 | rs6590811 | rs6598265 | rs6606652 | rs6641173  | rs66515764 | rs66595702 |
| rs657605  | rs6585256 | rs6590812 | rs6598351 | rs6606686 | rs664172   | rs66518778 | rs6659854  |
| rs6576443 | rs6585424 | rs6590816 | rs6598475 | rs6606710 | rs664223   | rs66519732 | rs6659932  |
| rs6576457 | rs6585426 | rs6591188 | rs6598539 | rs6606725 | rs664353   | rs66520518 | rs66602224 |
| rs6576462 | rs6585429 | rs6591407 | rs6598541 | rs6606731 | rs664382   | rs66520913 | rs6660899  |
| rs657693  | rs6585763 | rs6591434 | rs6598542 | rs660701  | rs664398   | rs66522322 | rs66611183 |
| rs6577327 | rs6585827 | rs6591444 | rs6599079 | rs6607275 | rs664414   | rs66526029 | rs6661316  |
| rs6577356 | rs6585943 | rs6591508 | rs6599175 | rs6607337 | rs664485   | rs665268   | rs6661554  |
| rs6577362 | rs6585986 | rs6591561 | rs6599192 | rs6607368 | rs664494   | rs66528032 | rs66616264 |
| rs6577497 | rs6586030 | rs6591578 | rs6599222 | rs660745  | rs664532   | rs66530140 | rs66616635 |
| rs6577536 | rs6586063 | rs6592362 | rs6599232 | rs660773  | rs66460909 | rs66530629 | rs66617308 |
| rs6577584 | rs6586145 | rs6592651 | rs6599234 | rs6608539 | rs66461782 | rs66530963 | rs6661843  |
| rs6577585 | rs6586163 | rs6592753 | rs6599250 | rs660879  | rs66464318 | rs66531832 | rs6661909  |
| rs6578061 | rs658621  | rs6592775 | rs6599251 | rs660895  | rs66464442 | rs66531927 | rs6661934  |

|            |            |            |            |            |            |            |            |
|------------|------------|------------|------------|------------|------------|------------|------------|
| rs66619583 | rs6667605  | rs66723169 | rs6678033  | rs66836460 | rs668871   | rs6694158  | rs67000219 |
| rs6661961  | rs66678311 | rs66723505 | rs667805   | rs6683704  | rs66887589 | rs66942171 | rs67000065 |
| rs66620549 | rs6667862  | rs6672390  | rs66781836 | rs6683757  | rs6688849  | rs6694351  | rs6700241  |
| rs6662263  | rs66679256 | rs6672420  | rs66782572 | rs6683809  | rs668887   | rs6694357  | rs6700266  |
| rs6662330  | rs6667939  | rs66724425 | rs6678517  | rs6683926  | rs66888736 | rs6694387  | rs67003112 |
| rs6662386  | rs66679433 | rs66725070 | rs6678546  | rs6684189  | rs6689     | rs66943969 | rs6700363  |
| rs66624040 | rs6668     | rs6672530  | rs6678622  | rs6684205  | rs6689056  | rs6694545  | rs67003685 |
| rs66624589 | rs6668048  | rs66726284 | rs6678632  | rs6684361  | rs6689125  | rs6694768  | rs6700559  |
| rs6662509  | rs6668050  | rs6672758  | rs6678639  | rs6684375  | rs6689263  | rs6695019  | rs6700582  |
| rs6662572  | rs6668107  | rs667282   | rs6678914  | rs66844142 | rs6689306  | rs6695101  | rs6700597  |
| rs6662618  | rs6668108  | rs66728407 | rs6679002  | rs6684455  | rs6689335  | rs6695132  | rs67006560 |
| rs66626713 | rs66682219 | rs6672843  | rs6679073  | rs66844552 | rs668941   | rs6695321  | rs6700673  |
| rs66626994 | rs66682515 | rs6672856  | rs6679120  | rs6684514  | rs6689470  | rs66954617 | rs6700896  |
| rs6662771  | rs666833   | rs6672925  | rs66791238 | rs668459   | rs668948   | rs66954828 | rs67009183 |
| rs6662930  | rs666845   | rs6672986  | rs667920   | rs6684709  | rs6689611  | rs669556   | rs6700965  |
| rs66632892 | rs66684608 | rs6672992  | rs6679233  | rs6684868  | rs6689641  | rs66956368 | rs67012134 |
| rs6663324  | rs6668534  | rs66731853 | rs667927   | rs6684992  | rs6689862  | rs6695640  | rs6701290  |
| rs6663484  | rs6668586  | rs6673267  | rs66792787 | rs6685187  | rs668998   | rs6695867  | rs67013744 |
| rs666350   | rs6668659  | rs66733022 | rs6679356  | rs6685188  | rs66900043 | rs6695898  | rs6701381  |
| rs66637216 | rs6668720  | rs6673341  | rs6679379  | rs66852340 | rs6690181  | rs6695965  | rs6701713  |
| rs6663731  | rs66689022 | rs6673347  | rs66793829 | rs66852417 | rs6690186  | rs6695980  | rs6701752  |
| rs6663751  | rs6668968  | rs6673575  | rs6679414  | rs66852704 | rs66901899 | rs6696068  | rs670179   |
| rs6664244  | rs6669072  | rs6673652  | rs6679458  | rs6685271  | rs6690195  | rs669607   | rs67017972 |
| rs6664374  | rs66691851 | rs66736981 | rs6679677  | rs6685323  | rs6690264  | rs6696074  | rs670180   |
| rs6664388  | rs6669234  | rs6673752  | rs6679817  | rs6685497  | rs6690292  | rs6696239  | rs6701977  |
| rs6664467  | rs6669284  | rs6673775  | rs66798303 | rs668555   | rs6690335  | rs6696259  | rs6702040  |
| rs6664489  | rs666930   | rs6673928  | rs6679838  | rs6685593  | rs6690398  | rs66964413 | rs670211   |
| rs66645127 | rs6669341  | rs66739581 | rs6679981  | rs6685701  | rs6690450  | rs6696533  | rs67021138 |
| rs6664626  | rs6669371  | rs6674176  | rs66800491 | rs6685766  | rs66904764 | rs6696575  | rs6702412  |
| rs666463   | rs6669384  | rs6674304  | rs66803065 | rs66858280 | rs669052   | rs6696828  | rs67025039 |
| rs6664706  | rs6669543  | rs6674512  | rs6680310  | rs6685859  | rs66905828 | rs6696846  | rs6702604  |
| rs6664881  | rs6669645  | rs6674686  | rs6680369  | rs6685931  | rs6690619  | rs66968950 | rs6702619  |
| rs6664969  | rs6669886  | rs6674884  | rs6680486  | rs6686     | rs6690625  | rs6696908  | rs67027895 |
| rs6664992  | rs6669919  | rs66749983 | rs66806308 | rs6686005  | rs66906321 | rs6696923  | rs6702820  |
| rs66650179 | rs6669975  | rs667515   | rs6680737  | rs6686093  | rs6690633  | rs6696981  | rs67028245 |
| rs66650371 | rs6670122  | rs66752974 | rs6680839  | rs6686271  | rs66907226 | rs66969865 | rs6702939  |
| rs6665290  | rs66701606 | rs6675402  | rs6680922  | rs6686331  | rs6690982  | rs6697083  | rs6703093  |
| rs6665323  | rs6670165  | rs66756037 | rs6681012  | rs6686367  | rs6691053  | rs6697139  | rs670318   |
| rs66654016 | rs6670198  | rs66756214 | rs6681149  | rs66864104 | rs6691170  | rs6697258  | rs6703183  |
| rs666555   | rs66704626 | rs6675668  | rs6681354  | rs66864335 | rs6691195  | rs6697464  | rs6703335  |
| rs6665572  | rs6670873  | rs6675690  | rs6681426  | rs66865237 | rs6691427  | rs6697469  | rs6703348  |
| rs6665610  | rs6670896  | rs66757203 | rs6681480  | rs6686722  | rs6691442  | rs66974934 | rs67034206 |
| rs6665631  | rs6670899  | rs667575   | rs66815886 | rs6686842  | rs6691738  | rs66975207 | rs670352   |
| rs6665637  | rs6671009  | rs66758084 | rs66815895 | rs6686889  | rs66917623 | rs6697584  | rs67035249 |
| rs6665764  | rs6671070  | rs6675858  | rs6681610  | rs6686944  | rs6691768  | rs6697602  | rs67035325 |
| rs66658258 | rs66710707 | rs66759488 | rs6681713  | rs6687021  | rs6691977  | rs66976655 | rs67035515 |
| rs6665841  | rs6671130  | rs66760320 | rs66817747 | rs6687024  | rs6691993  | rs6697763  | rs6703588  |
| rs6665912  | rs6671141  | rs6676143  | rs6681849  | rs66871626 | rs6692026  | rs6697886  | rs67036916 |
| rs6665962  | rs6671162  | rs6676150  | rs66819430 | rs6687367  | rs6692170  | rs66978877 | rs67037045 |
| rs6666020  | rs6671166  | rs66761698 | rs66819621 | rs6687373  | rs6692209  | rs669799   | rs6703781  |
| rs6666119  | rs6671200  | rs6676180  | rs6682095  | rs6687430  | rs6692219  | rs66983327 | rs67038483 |
| rs6666223  | rs6671230  | rs6676300  | rs668210   | rs6687487  | rs66922415 | rs6698653  | rs6703865  |
| rs6666258  | rs66712908 | rs66763009 | rs66821824 | rs66877117 | rs66922517 | rs6698680  | rs6703872  |
| rs66663059 | rs6671332  | rs6676472  | rs6682237  | rs6687758  | rs669257   | rs66987842 | rs6703976  |
| rs6666703  | rs6671342  | rs6676846  | rs66823261 | rs6687813  | rs6692738  | rs66989638 | rs6704     |
| rs6666767  | rs6671426  | rs6677006  | rs6682438  | rs66879815 | rs66930627 | rs66990951 | rs670401   |
| rs6666886  | rs66715423 | rs667718   | rs66824612 | rs6687986  | rs6693105  | rs66992977 | rs6704012  |
| rs66671632 | rs66716358 | rs667730   | rs6682671  | rs668799   | rs6693283  | rs66993681 | rs6704070  |
| rs6667182  | rs66716653 | rs6677309  | rs66826727 | rs6687993  | rs6693388  | rs66993685 | rs670463   |
| rs666720   | rs66716938 | rs66774912 | rs66827053 | rs6688053  | rs66934106 | rs6699397  | rs6704641  |
| rs6667242  | rs6671730  | rs6677530  | rs6683021  | rs6688233  | rs6693417  | rs6699417  | rs67046615 |
| rs6667260  | rs6671847  | rs6677545  | rs6683032  | rs66883355 | rs6693567  | rs669952   | rs67047091 |
| rs6667291  | rs6671926  | rs6677595  | rs66832523 | rs66883945 | rs66937127 | rs6699629  | rs6704768  |
| rs6667297  | rs6672031  | rs6677604  | rs6683273  | rs6688537  | rs6693842  | rs6699701  | rs670501   |
| rs66674044 | rs6672038  | rs6677771  | rs66833621 | rs6688577  | rs6693893  | rs6699744  | rs67050149 |
| rs66674732 | rs66720556 | rs6677940  | rs6683383  | rs6688625  | rs6694089  | rs66998222 | rs67050321 |
| rs6667532  | rs66721975 | rs6678027  | rs6683598  | rs66886492 | rs66941101 | rs670      | rs67050670 |



|            |            |            |            |            |            |            |            |
|------------|------------|------------|------------|------------|------------|------------|------------|
| rs6705138  | rs6711319  | rs6716872  | rs67221163 | rs67282839 | rs67340775 | rs6738962  | rs6744040  |
| rs67052019 | rs6711135  | rs6716898  | rs6722159  | rs6728302  | rs673408   | rs6738964  | rs67442259 |
| rs670523   | rs6711390  | rs67169439 | rs6722241  | rs6728523  | rs6734118  | rs6739199  | rs674424   |
| rs6705305  | rs6711399  | rs6716963  | rs6722387  | rs67285987 | rs6734238  | rs67392224 | rs6744254  |
| rs67053123 | rs67114357 | rs6717283  | rs6722456  | rs6728742  | rs6734367  | rs6739701  | rs67443441 |
| rs6705511  | rs67114627 | rs6717480  | rs67224956 | rs6728830  | rs67344323 | rs6739706  | rs674437   |
| rs6705514  | rs6711493  | rs67175307 | rs67224963 | rs6728861  | rs6734942  | rs67397200 | rs6744393  |
| rs6705577  | rs6711700  | rs67175901 | rs6722557  | rs672889   | rs6734957  | rs6739725  | rs674451   |
| rs6705628  | rs6711710  | rs6717591  | rs6722794  | rs67289879 | rs67349960 | rs6739755  | rs67445452 |
| rs6705646  | rs671188   | rs6717602  | rs6722871  | rs6729330  | rs6735049  | rs67397717 | rs67445542 |
| rs67057658 | rs6711976  | rs6717684  | rs67229052 | rs672948   | rs6735154  | rs6739772  | rs6744584  |
| rs6705839  | rs67119854 | rs67177172 | rs6722962  | rs6729612  | rs6735214  | rs6739779  | rs6744646  |
| rs6705939  | rs6712     | rs6717858  | rs6723077  | rs67297943 | rs673526   | rs6739788  | rs67447472 |
| rs6706     | rs67120362 | rs6717900  | rs672313   | rs6729815  | rs6735269  | rs6739804  | rs6744844  |
| rs6706045  | rs6712091  | rs6717918  | rs6723197  | rs6729895  | rs6735318  | rs6739913  | rs674486   |
| rs6706067  | rs6712094  | rs67180937 | rs6723226  | rs6729954  | rs6735393  | rs67399148 | rs674491   |
| rs6706095  | rs67121641 | rs6718154  | rs67232546 | rs6730083  | rs673548   | rs6740021  | rs6744983  |
| rs6706275  | rs6712203  | rs6718203  | rs672341   | rs6730157  | rs67355556 | rs67403786 | rs67450539 |
| rs6706313  | rs6712515  | rs67182686 | rs67234920 | rs6730325  | rs6735626  | rs6740462  | rs67450615 |
| rs6706377  | rs671255   | rs67183237 | rs6723509  | rs6730483  | rs6735649  | rs6740545  | rs674514   |
| rs6706397  | rs6712872  | rs67183972 | rs6723557  | rs6730558  | rs6735656  | rs6740584  | rs6745190  |
| rs6706606  | rs6712905  | rs6718450  | rs6723724  | rs67307131 | rs6735739  | rs6740709  | rs6745444  |
| rs6706968  | rs67129560 | rs67184556 | rs6723768  | rs6731005  | rs6735842  | rs6740731  | rs6745529  |
| rs6707137  | rs67131976 | rs6718511  | rs6723841  | rs6731125  | rs6735880  | rs6740838  | rs6745543  |
| rs67073037 | rs671333   | rs6718516  | rs67240003 | rs67311347 | rs6735923  | rs6740847  | rs67455627 |
| rs67073213 | rs671339   | rs6718520  | rs6724073  | rs6731302  | rs6736025  | rs674094   | rs67456868 |
| rs6707386  | rs6713406  | rs6718563  | rs67241230 | rs6731373  | rs67361341 | rs6740960  | rs6745907  |
| rs67074167 | rs671370   | rs6718569  | rs672413   | rs6731420  | rs6736175  | rs6741115  | rs6745983  |
| rs6707445  | rs6713865  | rs6718635  | rs6724315  | rs6731515  | rs67362351 | rs6741228  | rs6746072  |
| rs670752   | rs6713895  | rs6718655  | rs6724338  | rs6731647  | rs6736362  | rs6741307  | rs674621   |
| rs6707735  | rs6714016  | rs6718682  | rs6724428  | rs67316945 | rs6736411  | rs6741336  | rs67462449 |
| rs6707827  | rs6714110  | rs6718798  | rs6724465  | rs6731759  | rs67365433 | rs6741427  | rs6746275  |
| rs67079536 | rs67141286 | rs6718843  | rs672457   | rs6731872  | rs6736913  | rs6741486  | rs6746340  |
| rs6708046  | rs67142165 | rs6718863  | rs67246224 | rs6731993  | rs6736992  | rs6741499  | rs67463976 |
| rs6708049  | rs6714430  | rs6719214  | rs6724624  | rs6732097  | rs6737075  | rs6741676  | rs67464700 |
| rs6708167  | rs6714450  | rs6719428  | rs6724747  | rs6732134  | rs6737082  | rs6741751  | rs67465958 |
| rs67082009 | rs6714523  | rs6719507  | rs67248060 | rs6732141  | rs6737187  | rs674178   | rs67466227 |
| rs6708413  | rs6714534  | rs6719672  | rs6724928  | rs6732160  | rs67372037 | rs6741819  | rs6746679  |
| rs6708515  | rs6714546  | rs6719806  | rs67249485 | rs6732189  | rs6737205  | rs67418890 | rs6746841  |
| rs6708545  | rs67145503 | rs6719813  | rs6724965  | rs6732220  | rs6737264  | rs6741945  | rs6747023  |
| rs6708643  | rs6714634  | rs6719830  | rs6725031  | rs6732308  | rs67372909 | rs6741949  | rs6747212  |
| rs6708660  | rs6714642  | rs671985   | rs67250450 | rs6732426  | rs6737291  | rs6742     | rs6747242  |
| rs6708702  | rs6714750  | rs6719889  | rs67254669 | rs6732465  | rs6737318  | rs6742041  | rs6747380  |
| rs6708784  | rs6714788  | rs6720034  | rs6725517  | rs673253   | rs67374027 | rs6742078  | rs67474621 |
| rs67090117 | rs67148051 | rs6720064  | rs6725549  | rs6732565  | rs6737433  | rs674222   | rs6747488  |
| rs67093094 | rs6714900  | rs6720215  | rs67257872 | rs67326273 | rs673764   | rs6742276  | rs6747490  |
| rs6709352  | rs6715064  | rs6720394  | rs67258057 | rs67326386 | rs6737860  | rs6742301  | rs6747542  |
| rs6709385  | rs6715073  | rs6720515  | rs6725806  | rs6732655  | rs67378703 | rs67423398 | rs67477288 |
| rs6709656  | rs6715106  | rs672058   | rs6725814  | rs6732795  | rs67379620 | rs6742445  | rs6747755  |
| rs6709815  | rs6715284  | rs6720647  | rs6725887  | rs6733026  | rs6738028  | rs67426328 | rs6747843  |
| rs6709904  | rs6715321  | rs6720763  | rs6726160  | rs67330701 | rs6738113  | rs6743030  | rs6747874  |
| rs671      | rs67153520 | rs6720868  | rs6726182  | rs6733289  | rs67381177 | rs6743032  | rs6747943  |
| rs6710091  | rs67153654 | rs6720941  | rs6726612  | rs67332916 | rs6738207  | rs6743060  | rs6747952  |
| rs6710140  | rs67156297 | rs67210567 | rs6726821  | rs6733298  | rs67382147 | rs6743068  | rs6747972  |
| rs67102420 | rs6715793  | rs672107   | rs67269808 | rs673335   | rs6738433  | rs6743071  | rs6748088  |
| rs6710301  | rs6715849  | rs6721104  | rs67272968 | rs673344   | rs6738438  | rs674313   | rs6748131  |
| rs6710438  | rs6715862  | rs6721145  | rs6727396  | rs6733446  | rs6738490  | rs67432087 | rs67482087 |
| rs6710518  | rs6715901  | rs6721148  | rs672740   | rs6733504  | rs6738529  | rs6743226  | rs6748251  |
| rs6710823  | rs6715902  | rs6721459  | rs672757   | rs6733706  | rs673854   | rs6743376  | rs67482514 |
| rs6710871  | rs67159741 | rs6721495  | rs67276929 | rs67337506 | rs6738544  | rs6743594  | rs674833   |
| rs6710938  | rs6716011  | rs6721549  | rs6727752  | rs67338227 | rs67385572 | rs6743613  | rs6748341  |
| rs6711001  | rs6716216  | rs6721577  | rs6727872  | rs67338294 | rs67385638 | rs67436663 | rs67483792 |
| rs6711012  | rs671623   | rs6721663  | rs6728021  | rs6733834  | rs6738627  | rs6743685  | rs6748657  |
| rs6711016  | rs67162484 | rs6721701  | rs672806   | rs67338345 | rs6738724  | rs6743766  | rs6748662  |
| rs6711058  | rs6716394  | rs672187   | rs67280839 | rs6733839  | rs6738825  | rs67439138 | rs6748734  |
| rs67111717 | rs6716536  | rs6721975  | rs6728178  | rs67339103 | rs6738833  | rs6743916  | rs67487380 |
| rs6711254  | rs6716753  | rs6722113  | rs6728237  | rs6733972  | rs6738860  | rs6743963  | rs6748821  |

|            |            |            |            |            |            |            |            |
|------------|------------|------------|------------|------------|------------|------------|------------|
| rs67491774 | rs6755198  | rs67608943 | rs67665719 | rs677394   | rs6779488  | rs678540   | rs679149   |
| rs6749371  | rs6755221  | rs6760964  | rs6766859  | rs6774054  | rs67795055 | rs67854369 | rs6791514  |
| rs6749646  | rs6755248  | rs6761104  | rs6766897  | rs6774097  | rs67795913 | rs6785450  | rs6791526  |
| rs67497633 | rs6755334  | rs6761129  | rs67672396 | rs6774127  | rs67796445 | rs6785461  | rs6791672  |
| rs6749855  | rs6755476  | rs67611440 | rs67672984 | rs67742458 | rs6779928  | rs6785807  | rs679170   |
| rs6749886  | rs6755502  | rs6761276  | rs67674876 | rs67744136 | rs6779998  | rs6785881  | rs6791763  |
| rs6749972  | rs6755690  | rs67612840 | rs6767455  | rs6774470  | rs678      | rs6786055  | rs6792151  |
| rs6750047  | rs6755777  | rs6761320  | rs67676925 | rs6774494  | rs6780171  | rs6786081  | rs67922471 |
| rs6750050  | rs6755783  | rs6761390  | rs6767786  | rs6774533  | rs6780250  | rs6786088  | rs6792259  |
| rs6750059  | rs6755786  | rs67614146 | rs6767800  | rs6774721  | rs67802835 | rs6786418  | rs679228   |
| rs6750081  | rs675600   | rs6761463  | rs6767899  | rs6774762  | rs6780346  | rs6786550  | rs6792408  |
| rs6750107  | rs6756038  | rs67615608 | rs6768221  | rs6774970  | rs67803788 | rs6787063  | rs6792601  |
| rs67501351 | rs675605   | rs6761655  | rs67682613 | rs6775091  | rs6780414  | rs6787151  | rs6792696  |
| rs6750228  | rs6756117  | rs67617547 | rs67683090 | rs6775314  | rs6780429  | rs6787172  | rs6792725  |
| rs6750285  | rs6756149  | rs67618117 | rs6768542  | rs6775319  | rs6780544  | rs6787229  | rs67927699 |
| rs6750410  | rs6756212  | rs6761893  | rs6768627  | rs6775464  | rs67806247 | rs67872952 | rs6792805  |
| rs6750529  | rs67563284 | rs676199   | rs67689854 | rs6775484  | rs6780666  | rs6787336  | rs6792892  |
| rs67506027 | rs6756419  | rs6762     | rs67692128 | rs67755137 | rs67807996 | rs6787363  | rs6792918  |
| rs6750720  | rs6756470  | rs676210   | rs67692806 | rs6775581  | rs6780858  | rs6787391  | rs6793191  |
| rs6750754  | rs6756513  | rs6762208  | rs6769392  | rs6775611  | rs67808654 | rs678741   | rs67931976 |
| rs6750782  | rs675661   | rs6762267  | rs6769511  | rs67756423 | rs6781237  | rs6787471  | rs6793245  |
| rs6750795  | rs6756610  | rs6762415  | rs6769567  | rs6775731  | rs6781254  | rs67877276 | rs67932684 |
| rs6750801  | rs6756629  | rs6762477  | rs6769642  | rs67758468 | rs6781336  | rs6787775  | rs6793295  |
| rs6751138  | rs6756875  | rs676256   | rs67696533 | rs6776003  | rs6781362  | rs6787782  | rs67934334 |
| rs67513858 | rs6756973  | rs6762565  | rs6769821  | rs67760252 | rs6781368  | rs67881017 | rs67934705 |
| rs67514550 | rs6757058  | rs6762578  | rs6769912  | rs6776032  | rs678170   | rs6788198  | rs6793656  |
| rs6751609  | rs6757087  | rs6762644  | rs676996   | rs6776145  | rs6781726  | rs6788232  | rs67937361 |
| rs67517081 | rs6757093  | rs6762714  | rs6770131  | rs6776198  | rs6781808  | rs67882944 | rs6794165  |
| rs6751968  | rs6757137  | rs6762719  | rs6770152  | rs67762893 | rs6781853  | rs67885470 | rs679429   |
| rs6751972  | rs6757486  | rs67628277 | rs6770162  | rs6776396  | rs6781897  | rs67886110 | rs67943620 |
| rs6751993  | rs67575951 | rs6762851  | rs6770252  | rs677665   | rs67820074 | rs6788620  | rs6794370  |
| rs6752042  | rs67575965 | rs6763024  | rs6770476  | rs6776685  | rs67820526 | rs67886747 | rs67944653 |
| rs675209   | rs6757906  | rs6763048  | rs6770622  | rs67766926 | rs6782116  | rs6788676  | rs6794670  |
| rs6752107  | rs6757927  | rs67630759 | rs6770670  | rs6776722  | rs6782178  | rs67889059 | rs6794695  |
| rs6752228  | rs6758290  | rs67631072 | rs6770911  | rs6776757  | rs6782181  | rs6788984  | rs6794796  |
| rs6752376  | rs67582908 | rs67631345 | rs67709364 | rs67768228 | rs6782190  | rs67890480 | rs6794846  |
| rs6752378  | rs67583169 | rs6763377  | rs67710536 | rs67770272 | rs6782228  | rs67890737 | rs6794880  |
| rs67523949 | rs6758317  | rs6763449  | rs6771054  | rs6777217  | rs6782394  | rs67890964 | rs679515   |
| rs6752414  | rs67584485 | rs6763508  | rs67714233 | rs6777317  | rs6782400  | rs678916   | rs6795177  |
| rs6752643  | rs675849   | rs6763648  | rs6771444  | rs6777332  | rs6782467  | rs6789211  | rs67952556 |
| rs6752657  | rs67585357 | rs6763687  | rs6771469  | rs67773324 | rs6782694  | rs6789437  | rs6795372  |
| rs6752706  | rs6758586  | rs676387   | rs6771521  | rs6777363  | rs6782697  | rs6789546  | rs6795735  |
| rs6752754  | rs67587726 | rs6763925  | rs6771541  | rs6777420  | rs67827860 | rs678962   | rs679574   |
| rs6752770  | rs6758859  | rs6763927  | rs67716713 | rs67775399 | rs6782812  | rs6789653  | rs6795775  |
| rs67527887 | rs6759108  | rs6763931  | rs6771707  | rs67775544 | rs6782972  | rs6789699  | rs67958007 |
| rs6752813  | rs6759298  | rs6763938  | rs6771733  | rs6777684  | rs6783013  | rs6789712  | rs6795831  |
| rs6752950  | rs6759321  | rs6764184  | rs6771917  | rs67777803 | rs6783138  | rs6789885  | rs6795970  |
| rs67529638 | rs67593591 | rs6764279  | rs67719508 | rs6777784  | rs6783233  | rs6790058  | rs6795978  |
| rs6752964  | rs6759518  | rs676443   | rs67720684 | rs6777925  | rs6783281  | rs6790396  | rs6796     |
| rs6752979  | rs67596067 | rs676457   | rs6772089  | rs6777965  | rs67833703 | rs6790538  | rs6796502  |
| rs67530707 | rs6759626  | rs6764769  | rs6772151  | rs67779898 | rs678347   | rs6790568  | rs67967246 |
| rs6753137  | rs6759670  | rs67648672 | rs6772177  | rs6778003  | rs6783573  | rs67906804 | rs6796803  |
| rs67532025 | rs67596711 | rs67650739 | rs6772287  | rs6778080  | rs67836407 | rs6790697  | rs67968065 |
| rs6753292  | rs67597676 | rs67651018 | rs6772484  | rs6778194  | rs678393   | rs6790699  | rs67968328 |
| rs6753344  | rs6759839  | rs67651814 | rs6772646  | rs6778487  | rs67839313 | rs6790867  | rs6796837  |
| rs6753739  | rs67598967 | rs67652508 | rs6772704  | rs6778584  | rs6784162  | rs679087   | rs67968533 |
| rs67537903 | rs6759922  | rs6765484  | rs6772849  | rs6778731  | rs6784183  | rs6790873  | rs67968906 |
| rs67538026 | rs6759927  | rs67654984 | rs6772896  | rs6778735  | rs6784200  | rs67908756 | rs67969609 |
| rs67538199 | rs6759952  | rs676556   | rs677325   | rs6778790  | rs67843390 | rs6790925  | rs67971539 |
| rs6753848  | rs67603370 | rs6765866  | rs6773343  | rs677888   | rs6784615  | rs6790951  | rs6797165  |
| rs6754295  | rs6760539  | rs6765877  | rs67733649 | rs67790232 | rs67848150 | rs6791035  | rs6797277  |
| rs6754296  | rs67605425 | rs67659323 | rs6773408  | rs6779258  | rs6784820  | rs6791046  | rs6797500  |
| rs6754311  | rs6760772  | rs6766037  | rs67735224 | rs6779302  | rs6784925  | rs6791117  | rs6797587  |
| rs6754433  | rs6760805  | rs67661275 | rs6773547  | rs6779340  | rs6785012  | rs6791142  | rs67976715 |
| rs67544533 | rs6760820  | rs6766170  | rs677355   | rs6779368  | rs6785034  | rs67913249 | rs6797774  |
| rs67551275 | rs6760842  | rs67662065 | rs6773854  | rs6779380  | rs6785206  | rs6791479  | rs679782   |
| rs67551338 | rs6760887  | rs6766244  | rs6773869  | rs6779442  | rs6785233  | rs6791480  |            |

|            |            |            |            |           |           |           |           |
|------------|------------|------------|------------|-----------|-----------|-----------|-----------|
| rs6797840  | rs6803651  | rs6808835  | rs6816902  | rs6826473 | rs6838228 | rs6847935 | rs6860111 |
| rs679787   | rs680379   | rs6808837  | rs6816922  | rs6826663 | rs6838265 | rs6847950 | rs6860245 |
| rs6798015  | rs6803848  | rs68088846 | rs68169458 | rs6826785 | rs6838291 | rs6847975 | rs686030  |
| rs6798068  | rs680386   | rs6808893  | rs6817105  | rs6826964 | rs6838613 | rs684818  | rs6860339 |
| rs67981189 | rs6804173  | rs6808932  | rs6817238  | rs6827412 | rs6838677 | rs6848819 | rs686036  |
| rs6798167  | rs6804181  | rs6809081  | rs6817273  | rs6827598 | rs6839437 | rs6848906 | rs6860626 |
| rs67981690 | rs6804239  | rs6809164  | rs68175985 | rs6827756 | rs6839705 | rs6849357 | rs6860726 |
| rs679833   | rs680434   | rs6809294  | rs68178377 | rs6827815 | rs6839719 | rs6849526 | rs6860806 |
| rs6798398  | rs6804368  | rs6809307  | rs6818081  | rs6828057 | rs684016  | rs6850025 | rs6860901 |
| rs679843   | rs6804441  | rs68093876 | rs6818100  | rs682819  | rs6840242 | rs6850306 | rs6860963 |
| rs6798507  | rs6804442  | rs68094047 | rs68181474 | rs6828271 | rs6840258 | rs685031  | rs6861117 |
| rs679866   | rs6804624  | rs68094276 | rs6818397  | rs6828523 | rs6840327 | rs6850421 | rs6861279 |
| rs6798755  | rs6804663  | rs680952   | rs6818414  | rs6828540 | rs6840360 | rs6850494 | rs6861649 |
| rs6798870  | rs68046920 | rs6809651  | rs681842   | rs6828795 | rs6840517 | rs6851006 | rs6861681 |
| rs6798891  | rs6804842  | rs68096672 | rs68185000 | rs6828872 | rs6840738 | rs685149  | rs6861691 |
| rs6798941  | rs6804848  | rs6809854  | rs6818511  | rs6828882 | rs6840804 | rs6851494 | rs6861925 |
| rs679899   | rs6804915  | rs6810039  | rs681869   | rs6828982 | rs6840978 | rs6851699 | rs6862011 |
| rs6799180  | rs68049170 | rs68100606 | rs681875   | rs6829184 | rs6841333 | rs6851943 | rs6862108 |
| rs67991850 | rs680515   | rs6810075  | rs68189791 | rs6829296 | rs6841433 | rs6852084 | rs6862195 |
| rs6799186  | rs6805161  | rs6810325  | rs6819003  | rs6829551 | rs6841473 | rs6852117 | rs6862251 |
| rs6799272  | rs68052276 | rs6810798  | rs6819021  | rs6829664 | rs6841581 | rs6852808 | rs6862346 |
| rs6799337  | rs6805251  | rs6810965  | rs68190844 | rs6829956 | rs6841675 | rs6852997 | rs6862381 |
| rs6799356  | rs6805417  | rs68110026 | rs68191    | rs6830062 | rs6841898 | rs6853156 | rs6862531 |
| rs6800032  | rs68054310 | rs68110799 | rs68191221 | rs6830371 | rs6842047 | rs6853254 | rs6862676 |
| rs6800122  | rs68055275 | rs6811219  | rs6819155  | rs6830443 | rs6842049 | rs6853490 | rs6862766 |
| rs6800135  | rs6805563  | rs6811532  | rs68192277 | rs6830832 | rs6842071 | rs6853599 | rs6863015 |
| rs6800177  | rs68056147 | rs68115660 | rs68192600 | rs6831006 | rs6842105 | rs685395  | rs686320  |
| rs6800181  | rs680567   | rs68116612 | rs6819331  | rs6831020 | rs684214  | rs6854006 | rs6863275 |
| rs6800190  | rs6805758  | rs681167   | rs6819372  | rs6831034 | rs6842241 | rs6854052 | rs6863411 |
| rs680022   | rs68058972 | rs68118529 | rs6819541  | rs6831256 | rs6842303 | rs685425  | rs6863638 |
| rs68002561 | rs6805910  | rs6812193  | rs682011   | rs6831257 | rs684232  | rs6854749 | rs6864049 |
| rs6800335  | rs6805945  | rs6812278  | rs6820391  | rs6831280 | rs684253  | rs6854783 | rs6864084 |
| rs6800541  | rs6806156  | rs6812281  | rs6820415  | rs6831352 | rs6842686 | rs6855246 | rs6864091 |
| rs6800641  | rs68062313 | rs681239   | rs6820627  | rs6831368 | rs6842889 | rs6855363 | rs6864478 |
| rs68006638 | rs680625   | rs6812533  | rs6820986  | rs6831503 | rs6843082 | rs6855629 | rs6864640 |
| rs6800707  | rs68062772 | rs6812640  | rs6821068  | rs6831679 | rs684329  | rs6855812 | rs6864667 |
| rs680071   | rs6806407  | rs6812798  | rs6821114  | rs683194  | rs6843446 | rs6855873 | rs6864688 |
| rs6800730  | rs6806528  | rs6812849  | rs6821144  | rs6832151 | rs6843852 | rs6855911 | rs6864691 |
| rs68007459 | rs6806529  | rs6813099  | rs6821438  | rs6832165 | rs6843953 | rs6855981 | rs6864713 |
| rs6800913  | rs68066031 | rs6813195  | rs682178   | rs6832439 | rs6843986 | rs6855993 | rs6864727 |
| rs6800916  | rs6806605  | rs681343   | rs6821937  | rs683250  | rs6844176 | rs685607  | rs686476  |
| rs6801153  | rs6806825  | rs6813517  | rs6821957  | rs6832720 | rs6844280 | rs6856422 | rs6864888 |
| rs6801231  | rs68069729 | rs68137036 | rs6822283  | rs6832762 | rs6844659 | rs6856616 | rs6864922 |
| rs6801405  | rs6807029  | rs68145588 | rs6822565  | rs6832779 | rs6844700 | rs6856693 | rs686548  |
| rs68015088 | rs6807234  | rs68148663 | rs6822628  | rs6832951 | rs6844847 | rs6856819 | rs6865582 |
| rs6801605  | rs680729   | rs68149176 | rs6822736  | rs6833292 | rs6844904 | rs6857    | rs6866204 |
| rs6801665  | rs6807301  | rs681524   | rs6822844  | rs6833433 | rs6845078 | rs6857001 | rs6866212 |
| rs6801781  | rs6807306  | rs6815248  | rs6822892  | rs6833591 | rs684513  | rs6857137 | rs6866306 |
| rs6801789  | rs6807381  | rs6815273  | rs6823199  | rs6833641 | rs684527  | rs685724  | rs6866330 |
| rs6801957  | rs6807666  | rs68152875 | rs6823268  | rs6833979 | rs6845321 | rs6857262 | rs6866344 |
| rs680210   | rs680775   | rs6815294  | rs6823423  | rs6834183 | rs684546  | rs6857303 | rs6866614 |
| rs68021656 | rs6807782  | rs68153167 | rs6823767  | rs6834314 | rs6845536 | rs6857559 | rs6867056 |
| rs6802174  | rs6807915  | rs6815422  | rs6823836  | rs6834488 | rs684562  | rs6857629 | rs6867325 |
| rs6802472  | rs6807935  | rs6815464  | rs682400   | rs6835078 | rs6845703 | rs6857728 | rs6867396 |
| rs6802807  | rs6807945  | rs6815538  | rs6824178  | rs6835108 | rs6845791 | rs6857814 | rs6867399 |
| rs6802828  | rs68080462 | rs681554   | rs6824451  | rs6835111 | rs6845865 | rs6858    | rs6867471 |
| rs6802894  | rs6808104  | rs6815597  | rs6824567  | rs683544  | rs6845901 | rs6858066 | rs6867518 |
| rs6802896  | rs6808140  | rs6815814  | rs6824723  | rs6835650 | rs6845999 | rs6858323 | rs6867654 |
| rs6803     | rs6808178  | rs6815859  | rs6824748  | rs6835992 | rs6846071 | rs6858698 | rs6867736 |
| rs6803008  | rs68081839 | rs6816002  | rs6825004  | rs6836610 | rs6846161 | rs6858964 | rs6867793 |
| rs6803137  | rs68082256 | rs6816078  | rs6825187  | rs6836941 | rs684630  | rs6859    | rs686781  |
| rs6803184  | rs680832   | rs6816134  | rs6825234  | rs6837324 | rs684631  | rs6859219 | rs6868047 |
| rs680321   | rs6808365  | rs68162171 | rs6825241  | rs6837335 | rs6846721 | rs6859667 | rs6868457 |
| rs68033110 | rs6808574  | rs6816389  | rs6825454  | rs6837349 | rs6846730 | rs6859727 | rs686861  |
| rs6803350  | rs68085814 | rs6816467  | rs6825911  | rs6837671 | rs6847640 | rs6859730 | rs6868805 |
| rs68034047 | rs68087547 | rs68165736 | rs682632   | rs6838021 | rs684773  | rs6859752 | rs6869021 |
| rs68035927 | rs6808807  | rs681673   | rs6826348  | rs683808  | rs684782  | rs685985  | rs6869095 |

|           |           |           |           |           |           |           |           |
|-----------|-----------|-----------|-----------|-----------|-----------|-----------|-----------|
| rs6869332 | rs6878827 | rs6886932 | rs6896898 | rs6904897 | rs6913361 | rs6920364 | rs6928583 |
| rs6869446 | rs6879040 | rs6887024 | rs6896927 | rs6905282 | rs6913406 | rs6920372 | rs692872  |
| rs6869502 | rs687914  | rs6887276 | rs6897117 | rs6905288 | rs6913474 | rs6920449 | rs6928810 |
| rs6869862 | rs6879147 | rs6887429 | rs6897129 | rs6905381 | rs6913677 | rs6920575 | rs6928836 |
| rs6869910 | rs6879220 | rs6887452 | rs6897169 | rs6905419 | rs6913974 | rs6920788 | rs6928864 |
| rs6869941 | rs6879260 | rs6887649 | rs6897196 | rs6905476 | rs6914036 | rs6920820 | rs6928977 |
| rs686998  | rs6879563 | rs6888037 | rs6897209 | rs6905544 | rs6914086 | rs6920962 | rs6928986 |
| rs6870096 | rs6879711 | rs6888065 | rs6897260 | rs6905582 | rs6914243 | rs6920965 | rs6929137 |
| rs6870103 | rs6879874 | rs6888135 | rs6897617 | rs6905736 | rs6914412 | rs6921029 | rs6929796 |
| rs6870152 | rs688     | rs6888159 | rs6897707 | rs6905837 | rs6914422 | rs6921438 | rs6929812 |
| rs6870189 | rs6880621 | rs6888304 | rs6897765 | rs6905891 | rs6914444 | rs6921542 | rs693     |
| rs6870246 | rs6880702 | rs6888517 | rs6897795 | rs6905986 | rs6914479 | rs692155  | rs6930181 |
| rs6870458 | rs6880778 | rs6889157 | rs6897932 | rs6906021 | rs6914579 | rs6921580 | rs6930558 |
| rs6870480 | rs6880997 | rs6889164 | rs689860  | rs6906241 | rs6914598 | rs6921878 | rs6930571 |
| rs6870556 | rs6881270 | rs6889177 | rs6898981 | rs6906287 | rs691461  | rs6921919 | rs6930689 |
| rs6870880 | rs6881396 | rs6889239 | rs6899139 | rs6906359 | rs6914622 | rs6922219 | rs6930924 |
| rs6870983 | rs6881515 | rs6889592 | rs6899155 | rs6906565 | rs6914699 | rs6922269 | rs6931118 |
| rs6871057 | rs688157  | rs6889665 | rs6899500 | rs6906737 | rs6914805 | rs6922300 | rs6931262 |
| rs6871087 | rs6881581 | rs688968  | rs6899545 | rs690674  | rs6914824 | rs6922416 | rs6931277 |
| rs6871374 | rs6881640 | rs6889699 | rs6899623 | rs6906830 | rs6914831 | rs6922558 | rs6931316 |
| rs6871626 | rs6881643 | rs6889822 | rs6899676 | rs690686  | rs6915030 | rs6922607 | rs6931354 |
| rs6871635 | rs6881648 | rs6889995 | rs6899876 | rs6906957 | rs6915310 | rs6922617 | rs6931356 |
| rs6871667 | rs688167  | rs689     | rs6899968 | rs6907240 | rs6915322 | rs6922758 | rs6931385 |
| rs6871748 | rs6881706 | rs6890270 | rs6899976 | rs6907508 | rs6915678 | rs6922815 | rs6931421 |
| rs6872579 | rs6881733 | rs6890310 | rs6900114 | rs6907805 | rs6915773 | rs6922960 | rs6931514 |
| rs6872796 | rs688181  | rs689049  | rs6900157 | rs6907843 | rs6915893 | rs6923139 | rs6931604 |
| rs687289  | rs688187  | rs6890580 | rs6900341 | rs6908042 | rs6916016 | rs6923431 | rs6931664 |
| rs687308  | rs6881942 | rs6890610 | rs6900444 | rs6908169 | rs6916079 | rs6923462 | rs6931740 |
| rs6873367 | rs6881956 | rs6890684 | rs6900473 | rs6908258 | rs6916289 | rs692360  | rs6932056 |
| rs687339  | rs688198  | rs6890690 | rs6900627 | rs6908425 | rs6916318 | rs6923811 | rs6932108 |
| rs6873472 | rs6882046 | rs6890853 | rs6900723 | rs6908626 | rs6916491 | rs6923866 | rs6932158 |
| rs6873557 | rs6882059 | rs6890961 | rs6900872 | rs6908726 | rs6916553 | rs6924023 | rs6932209 |
| rs6873969 | rs6882076 | rs6891054 | rs6900923 | rs6908915 | rs6916554 | rs6924387 | rs6932260 |
| rs6874    | rs6882226 | rs6891174 | rs6901004 | rs6908928 | rs6916624 | rs6924570 | rs6932350 |
| rs6874087 | rs6882422 | rs6891344 | rs6901317 | rs6909201 | rs6916891 | rs6924805 | rs6932590 |
| rs6874127 | rs6882578 | rs689167  | rs6901548 | rs6909229 | rs6916921 | rs6924808 | rs6932730 |
| rs6874142 | rs6882649 | rs6891790 | rs6901631 | rs6909279 | rs6917154 | rs6924815 | rs6932767 |
| rs6874178 | rs6882742 | rs689183  | rs6901830 | rs6909746 | rs6917204 | rs6925032 | rs6932812 |
| rs6874202 | rs6882776 | rs6891955 | rs6902    | rs6909752 | rs6917291 | rs6925103 | rs6932852 |
| rs687432  | rs6882861 | rs6892    | rs6902010 | rs6910071 | rs6917586 | rs6925689 | rs6932930 |
| rs6874524 | rs6883116 | rs6892249 | rs6902016 | rs691024  | rs6917603 | rs6925716 | rs6933130 |
| rs6874665 | rs6883228 | rs6892330 | rs6902116 | rs6910696 | rs6917738 | rs6925748 | rs693317  |
| rs687467  | rs6883247 | rs689274  | rs6902285 | rs6910838 | rs6918152 | rs6925750 | rs6933404 |
| rs6874731 | rs6883351 | rs6892844 | rs6902316 | rs6910919 | rs6918194 | rs6925777 | rs6933464 |
| rs6874833 | rs6883388 | rs6892884 | rs6902771 | rs691094  | rs6918311 | rs6926097 | rs6933660 |
| rs6875105 | rs6883400 | rs6893139 | rs690333  | rs6911024 | rs6918354 | rs6926219 | rs693367  |
| rs6875262 | rs6883412 | rs6893213 | rs6903443 | rs6911131 | rs6918434 | rs6926250 | rs6933716 |
| rs687531  | rs6883359 | rs6893300 | rs690346  | rs6911302 | rs6918506 | rs6926377 | rs6933790 |
| rs6875372 | rs6883712 | rs6893700 | rs6903570 | rs6911310 | rs6918558 | rs6926458 | rs6933883 |
| rs6875585 | rs6883723 | rs6893752 | rs6903575 | rs6911448 | rs6918586 | rs6926491 | rs6934010 |
| rs6875688 | rs6883937 | rs6893782 | rs6903608 | rs6911490 | rs6918725 | rs6926537 | rs6934818 |
| rs6875834 | rs688409  | rs6893949 | rs6903638 | rs6911599 | rs6918936 | rs6926552 | rs6934962 |
| rs6875907 | rs6884531 | rs6894014 | rs6903649 | rs6911621 | rs6918981 | rs6926677 | rs6934973 |
| rs687621  | rs6884702 | rs6894017 | rs6903705 | rs6911827 | rs6919154 | rs6926838 | rs6935086 |
| rs6876405 | rs6884881 | rs6894037 | rs6903716 | rs6911965 | rs6919210 | rs6926894 | rs6935129 |
| rs6876503 | rs6885032 | rs689411  | rs6903823 | rs6912005 | rs6919266 | rs6927022 | rs6935510 |
| rs6876712 | rs6885099 | rs6894139 | rs6903989 | rs6912057 | rs6919346 | rs6927172 | rs6935717 |
| rs687706  | rs6885132 | rs6894249 | rs6904031 | rs6912255 | rs6919397 | rs6927173 | rs6935723 |
| rs6877530 | rs6885199 | rs689449  | rs690428  | rs6912283 | rs6919440 | rs6927207 | rs6935891 |
| rs6877662 | rs6885307 | rs6894901 | rs6904345 | rs691243  | rs6919534 | rs6927268 | rs6935952 |
| rs6877715 | rs688540  | rs6895057 | rs6904395 | rs6912701 | rs6919858 | rs6927500 | rs6935954 |
| rs6877893 | rs688565  | rs6895232 | rs6904416 | rs6912933 | rs6919908 | rs6927514 | rs6935999 |
| rs6877994 | rs6885696 | rs6895892 | rs6904450 | rs6912958 | rs6920211 | rs6927569 | rs6936160 |
| rs6878069 | rs6885822 | rs6896348 | rs6904506 | rs6912975 | rs6920220 | rs6927936 | rs6936191 |
| rs6878122 | rs6886061 | rs6896357 | rs6904571 | rs6913093 | rs6920244 | rs6928024 | rs6936204 |
| rs6878284 | rs6886392 | rs6896858 | rs6904596 | rs691329  | rs6920323 | rs692804  | rs6936325 |
| rs6878780 | rs6886640 | rs6896867 | rs6904757 | rs6913325 | rs6920332 | rs6928545 | rs6936601 |

|           |           |           |           |           |           |           |           |
|-----------|-----------|-----------|-----------|-----------|-----------|-----------|-----------|
| rs693668  | rs694419  | rs6954    | rs6964421 | rs6972742 | rs698115  | rs6989141 | rs6998387 |
| rs6936749 | rs6944634 | rs6954012 | rs6964466 | rs6972975 | rs698147  | rs6989150 | rs699844  |
| rs693680  | rs6944674 | rs6954078 | rs6964487 | rs6973090 | rs6981523 | rs6989160 | rs6998692 |
| rs693698  | rs6945012 | rs6954446 | rs6964587 | rs6973256 | rs698153  | rs698927  | rs6998967 |
| rs6937121 | rs6945541 | rs6954499 | rs6964752 | rs6973656 | rs6981737 | rs6989821 | rs6999065 |
| rs6937167 | rs6945954 | rs695459  | rs6964771 | rs6973667 | rs6982152 | rs699     | rs6999158 |
| rs6937293 | rs6945984 | rs6954663 | rs6964833 | rs6974235 | rs6982226 | rs6990042 | rs6999466 |
| rs6937306 | rs6946091 | rs6954667 | rs6964854 | rs6974282 | rs6982308 | rs6990534 | rs6999569 |
| rs6937318 | rs6946097 | rs6954694 | rs6964969 | rs6974286 | rs6982502 | rs6990622 | rs6999602 |
| rs6937950 | rs6946136 | rs6955423 | rs6965019 | rs6974288 | rs6982636 | rs6990912 | rs6999835 |
| rs6937957 | rs6946168 | rs6955431 | rs6965122 | rs6974322 | rs6983129 | rs6990941 | rs6999934 |
| rs6938004 | rs694617  | rs6955702 | rs696516  | rs6974343 | rs6983150 | rs699165  | rs7000170 |
| rs6938026 | rs6946362 | rs6956283 | rs6965195 | rs6974363 | rs6983267 | rs6991832 | rs7000276 |
| rs6938042 | rs6946509 | rs6956293 | rs6965401 | rs697449  | rs6983393 | rs6991838 | rs7000279 |
| rs6938070 | rs6946660 | rs695646  | rs6965458 | rs6974491 | rs6983550 | rs6991952 | rs7000494 |
| rs6938081 | rs6946681 | rs6956494 | rs6965740 | rs6974574 | rs6983561 | rs6991966 | rs7000551 |
| rs6938239 | rs6946822 | rs6956946 | rs6965956 | rs6975024 | rs6983764 | rs6992123 | rs700059  |
| rs693839  | rs6946969 | rs6956980 | rs6966061 | rs6975036 | rs6983948 | rs6992491 | rs7000590 |
| rs6938453 | rs694739  | rs6957161 | rs6966112 | rs697511  | rs698406  | rs6992733 | rs7000772 |
| rs6938574 | rs6947395 | rs6957201 | rs6966166 | rs6975134 | rs6984210 | rs6992818 | rs7000773 |
| rs6938592 | rs6947612 | rs6957740 | rs6966540 | rs6975279 | rs6984242 | rs6992820 | rs7000796 |
| rs6938647 | rs6947830 | rs6957745 | rs6967129 | rs6975452 | rs6984305 | rs6992869 | rs700082  |
| rs6938937 | rs694786  | rs6957923 | rs6967168 | rs6975610 | rs6984358 | rs6993155 | rs700085  |
| rs6938966 | rs6948180 | rs6958010 | rs6967330 | rs6975660 | rs6984417 | rs6993244 | rs7000921 |
| rs6938973 | rs6948491 | rs6958059 | rs6967414 | rs6975977 | rs6984551 | rs6993266 | rs7001307 |
| rs6939019 | rs6948707 | rs6958350 | rs6967481 | rs6976    | rs6984764 | rs6993325 | rs7001340 |
| rs6939066 | rs6948759 | rs6958557 | rs6968125 | rs6976031 | rs6984782 | rs6993429 | rs7001604 |
| rs6939130 | rs6948810 | rs6958690 | rs6968240 | rs6976053 | rs6984820 | rs6993442 | rs7001648 |
| rs693918  | rs6949391 | rs6958696 | rs6968825 | rs6976090 | rs6985031 | rs699371  | rs7001819 |
| rs6939294 | rs6949509 | rs695871  | rs6968380 | rs6976111 | rs6985143 | rs6993770 | rs7001864 |
| rs6939340 | rs6949760 | rs6959212 | rs6968419 | rs6976429 | rs6985353 | rs6993813 | rs7002088 |
| rs6939464 | rs6949831 | rs6959579 | rs6968518 | rs6976572 | rs6985478 | rs6993892 | rs700236  |
| rs6939532 | rs6949851 | rs6959584 | rs6968554 | rs6976930 | rs6985508 | rs6994019 | rs700239  |
| rs6939576 | rs6950023 | rs6959832 | rs6968645 | rs697697  | rs6985616 | rs6994124 | rs7002959 |
| rs6939861 | rs6950324 | rs6959887 | rs6968704 | rs6977081 | rs6986    | rs6994183 | rs7003528 |
| rs6939900 | rs6950388 | rs696     | rs6968802 | rs6977136 | rs698610  | rs6994287 | rs7003550 |
| rs6940007 | rs6950425 | rs6960056 | rs6968827 | rs6977237 | rs6986109 | rs6994642 | rs7003794 |
| rs6940116 | rs6950442 | rs6960085 | rs6968865 | rs6977416 | rs6986151 | rs699465  | rs7003871 |
| rs6940342 | rs6950624 | rs6960249 | rs6968945 | rs6977460 | rs6986430 | rs6994670 | rs7004112 |
| rs6940493 | rs6950680 | rs6960360 | rs6968967 | rs6977470 | rs6986473 | rs6994725 | rs7004172 |
| rs6940638 | rs695103  | rs6960995 | rs6969115 | rs6977483 | rs6986601 | rs6994744 | rs7004509 |
| rs6940715 | rs695113  | rs6961014 | rs6969188 | rs6977955 | rs6986779 | rs6995018 | rs7004633 |
| rs6940878 | rs6951144 | rs6961048 | rs6969316 | rs6978070 | rs6986895 | rs6995307 | rs7004766 |
| rs6940880 | rs695115  | rs6961069 | rs6969329 | rs6978112 | rs6986921 | rs699534  | rs7004825 |
| rs6940945 | rs6951245 | rs6961102 | rs6969369 | rs6978327 | rs6987036 | rs6995342 | rs7005363 |
| rs6941112 | rs695137  | rs6961342 | rs6969410 | rs697852  | rs6987080 | rs6995390 | rs7005606 |
| rs6941160 | rs6951416 | rs6961605 | rs6969458 | rs6978611 | rs698718  | rs6995402 | rs7005834 |
| rs6941169 | rs6951449 | rs6961619 | rs6969706 | rs6978655 | rs6987181 | rs6995407 | rs700585  |
| rs6941322 | rs6951489 | rs6961634 | rs6969773 | rs6978677 | rs698724  | rs6995541 | rs7005884 |
| rs6941513 | rs6951574 | rs6961730 | rs6969780 | rs6978739 | rs6987305 | rs6995599 | rs700590  |
| rs6941594 | rs6951635 | rs6961761 | rs6969783 | rs6978841 | rs6987335 | rs6995692 | rs7005904 |
| rs694180  | rs6951643 | rs6961768 | rs6969965 | rs6978929 | rs6987355 | rs699579  | rs700641  |
| rs6942027 | rs695166  | rs6962012 | rs697003  | rs6979    | rs6987377 | rs6996562 | rs700646  |
| rs6942227 | rs6951759 | rs6962280 | rs6970541 | rs6979198 | rs6987444 | rs6996585 | rs700648  |
| rs6942255 | rs6951996 | rs6962750 | rs6970595 | rs6979218 | rs6987558 | rs699664  | rs7006504 |
| rs6942607 | rs6952006 | rs6962772 | rs6970673 | rs6979232 | rs6987702 | rs6996733 | rs700651  |
| rs6942609 | rs6952104 | rs696279  | rs6971211 | rs6979354 | rs6987719 | rs6997082 | rs7006527 |
| rs6942652 | rs6952233 | rs696281  | rs6971365 | rs6979377 | rs6988147 | rs6997330 | rs7006531 |
| rs6942739 | rs6952262 | rs6962836 | rs6971499 | rs6979446 | rs6988451 | rs6997340 | rs7006546 |
| rs6943067 | rs6952407 | rs6962887 | rs6971710 | rs6979832 | rs698853  | rs6997361 | rs700655  |
| rs6943324 | rs6952464 | rs6963015 | rs6971782 | rs6980043 | rs6988649 | rs6997458 | rs7006885 |
| rs6943555 | rs6952495 | rs6963105 | rs6972100 | rs6980299 | rs6988733 | rs6997600 | rs7006988 |
| rs6943656 | rs6952499 | rs6963115 | rs6972291 | rs6980334 | rs698891  | rs6997799 | rs7007297 |
| rs6943746 | rs6953274 | rs6963129 | rs6972297 | rs698047  | rs6988919 | rs6997839 | rs700746  |
| rs694383  | rs6953344 | rs6963134 | rs697238  | rs6980507 | rs6989099 | rs6997840 | rs700750  |
| rs6944092 | rs6953395 | rs6963840 | rs697239  | rs6980853 | rs6989110 | rs6997997 | rs700752  |
| rs6944123 | rs6953502 | rs6963853 | rs697248  | rs6981058 | rs698914  | rs6998007 | rs700753  |

|           |           |           |           |           |           |           |           |
|-----------|-----------|-----------|-----------|-----------|-----------|-----------|-----------|
| rs700755  | rs7017073 | rs7025728 | rs7033345 | rs7040409 | rs704984  | rs7072380 | rs707939  |
| rs7007550 | rs7017252 | rs7025880 | rs7033354 | rs7040561 | rs7050036 | rs7072574 | rs7079515 |
| rs700760  | rs7017414 | rs702606  | rs7033487 | rs704061  | rs705117  | rs7072591 | rs707954  |
| rs700768  | rs701760  | rs7026071 | rs7033598 | rs704067  | rs705145  | rs7072694 | rs7079679 |
| rs7007761 | rs7018436 | rs7026281 | rs7033638 | rs7040727 | rs7051718 | rs7072737 | rs707968  |
| rs7007820 | rs7018475 | rs702634  | rs7033677 | rs704077  | rs705219  | rs7072776 | rs7079743 |
| rs7007887 | rs701848  | rs7026534 | rs7033409 | rs7040970 | rs705379  | rs7072873 | rs7079858 |
| rs7007986 | rs7018813 | rs7026674 | rs7033410 | rs7040995 | rs705415  | rs7073435 | rs7080150 |
| rs7008182 | rs7019033 | rs7026684 | rs7034139 | rs7041    | rs7056546 | rs7073667 | rs7080386 |
| rs7008413 | rs701905  | rs7026688 | rs7034162 | rs7041139 | rs705687  | rs7073746 | rs7080472 |
| rs7008481 | rs7019055 | rs7026834 | rs7034200 | rs7041150 | rs705696  | rs7073802 | rs7080536 |
| rs7008536 | rs701929  | rs7027103 | rs7034315 | rs7041664 | rs705699  | rs7073961 | rs7080849 |
| rs7008654 | rs7019351 | rs7027110 | rs7034354 | rs7041702 | rs705700  | rs7073987 | rs708100  |
| rs7008697 | rs7019441 | rs7027172 | rs7034554 | rs704178  | rs705702  | rs7074041 | rs7081113 |
| rs7008867 | rs7019538 | rs7027205 | rs703482  | rs7041847 | rs705704  | rs7074303 | rs7081122 |
| rs7009110 | rs7019640 | rs7027509 | rs7035034 | rs7041895 | rs705705  | rs7074558 | rs7081254 |
| rs7009139 | rs7019909 | rs7027650 | rs7035284 | rs704191  | rs7057398 | rs7074871 | rs7081304 |
| rs7009170 | rs7020058 | rs7027772 | rs703530  | rs7042283 | rs7058676 | rs7075195 | rs7081476 |
| rs7009482 | rs7020196 | rs7028032 | rs7035315 | rs7042372 | rs70600   | rs7075218 | rs7081640 |
| rs7009854 | rs7020341 | rs702814  | rs703545  | rs7042625 | rs706015  | rs7075281 | rs7081678 |
| rs700992  | rs7020564 | rs7028191 | rs703556  | rs704278  | rs706025  | rs7075355 | rs7081744 |
| rs701006  | rs7020604 | rs7028386 | rs7035578 | rs704285  | rs706027  | rs7075477 | rs7081788 |
| rs7010173 | rs7020666 | rs7028424 | rs7035873 | rs7042950 | rs7060620 | rs7075591 | rs7082066 |
| rs7010246 | rs7020673 | rs7028486 | rs703593  | rs7043114 | rs7061210 | rs7075794 | rs708212  |
| rs7010267 | rs7020841 | rs7028641 | rs7036107 | rs7043196 | rs7061504 | rs7075993 | rs7082470 |
| rs7010394 | rs7020893 | rs702872  | rs7036399 | rs7043199 | rs706159  | rs7076100 | rs7083    |
| rs7010461 | rs7020920 | rs702873  | rs7036453 | rs7043265 | rs7061710 | rs7076156 | rs7083345 |
| rs7010590 | rs7020954 | rs7028900 | rs7036637 | rs7043304 | rs706208  | rs7076367 | rs7083359 |
| rs7010876 | rs7020996 | rs7029033 | rs7036656 | rs7043405 | rs70621   | rs7076398 | rs7083450 |
| rs7010917 | rs702101  | rs7029201 | rs7036973 | rs7043482 | rs706398  | rs7076523 | rs7083463 |
| rs701145  | rs7021445 | rs7029276 | rs7036984 | rs7043521 | rs706481  | rs7076938 | rs708382  |
| rs7011507 | rs702155  | rs7029396 | rs7037072 | rs704373  | rs7065171 | rs7076948 | rs7084062 |
| rs7011846 | rs7021589 | rs7029475 | rs7037266 | rs7044106 | rs7065712 | rs7077016 | rs7084137 |
| rs7011889 | rs7021721 | rs7029491 | rs7037324 | rs7044150 | rs706603  | rs7077066 | rs708437  |
| rs7012395 | rs7021901 | rs7029718 | rs7037424 | rs7044244 | rs7067005 | rs707718  | rs708439  |
| rs7012546 | rs7022    | rs7030248 | rs7037587 | rs7044246 | rs7067170 | rs7077256 | rs7084402 |
| rs7012636 | rs7022162 | rs7030280 | rs703764  | rs704426  | rs706778  | rs7077291 | rs7084454 |
| rs7012637 | rs702222  | rs7030354 | rs703816  | rs704444  | rs706779  | rs7077302 | rs7084503 |
| rs7012648 | rs702223  | rs703037  | rs703842  | rs704447  | rs7068157 | rs7077322 | rs7084508 |
| rs7012787 | rs702266  | rs7030373 | rs7038427 | rs7044529 | rs706819  | rs7077335 | rs7084764 |
| rs7012814 | rs7022807 | rs7030475 | rs7038525 | rs7044885 | rs7068966 | rs7077415 | rs7084828 |
| rs7012816 | rs7023329 | rs7030607 | rs7038554 | rs7045087 | rs7069115 | rs7077446 | rs7084921 |
| rs7013120 | rs7023465 | rs7030609 | rs703862  | rs7045138 | rs7069328 | rs7077580 | rs7084953 |
| rs701317  | rs7023828 | rs7030683 | rs7038675 | rs7045409 | rs7069750 | rs7077678 | rs7085104 |
| rs7013278 | rs7023900 | rs7030781 | rs7038943 | rs7045740 | rs7069830 | rs7077800 | rs7085433 |
| rs7013834 | rs7023933 | rs7030813 | rs7038966 | rs704614  | rs7069887 | rs7077812 | rs708563  |
| rs7013881 | rs702395  | rs7030895 | rs7039    | rs7046483 | rs7069916 | rs707794  | rs7085862 |
| rs701394  | rs7024300 | rs7030930 | rs703912  | rs704660  | rs7070175 | rs7077966 | rs708601  |
| rs7014099 | rs7024334 | rs7031032 | rs7039168 | rs7046845 | rs7070670 | rs7078    | rs7086174 |
| rs7014168 | rs7024579 | rs7031064 | rs7039458 | rs7047279 | rs7070678 | rs7078003 | rs7086249 |
| rs701428  | rs7024582 | rs703108  | rs7039467 | rs7047299 | rs7070693 | rs7078012 | rs7086377 |
| rs7014300 | rs7024673 | rs7031417 | rs703965  | rs7047414 | rs7070749 | rs7078160 | rs7086803 |
| rs7014346 | rs7024675 | rs7031625 | rs703966  | rs7047575 | rs7070847 | rs7078201 | rs708686  |
| rs7014448 | rs702485  | rs7031698 | rs703972  | rs7047770 | rs7070913 | rs7078330 | rs7086891 |
| rs701447  | rs702489  | rs7032019 | rs703978  | rs7047871 | rs7070980 | rs7078436 | rs7086898 |
| rs7014590 | rs702490  | rs7032102 | rs703980  | rs7047907 | rs7071036 | rs7078507 | rs7087058 |
| rs7014841 | rs7024924 | rs703212  | rs703981  | rs704795  | rs7071123 | rs7078811 | rs708727  |
| rs7014953 | rs702496  | rs703219  | rs7039819 | rs7048006 | rs7071131 | rs7078844 | rs7087356 |
| rs7014992 | rs702497  | rs7032316 | rs703984  | rs7048022 | rs7071206 | rs707892  | rs7087507 |
| rs7015    | rs7025089 | rs7032484 | rs703996  | rs7048196 | rs7071909 | rs7078927 | rs7087591 |
| rs7015050 | rs7025144 | rs7032489 | rs704     | rs7048271 | rs7071912 | rs7079083 | rs708785  |
| rs7015263 | rs7025162 | rs703254  | rs7040024 | rs704840  | rs7071943 | rs707916  | rs7088058 |
| rs7015630 | rs7025335 | rs7032549 | rs704010  | rs7048601 | rs7072066 | rs707927  | rs7088220 |
| rs7016086 | rs7025371 | rs7032572 | rs704017  | rs7048860 | rs7072204 | rs707928  | rs7088425 |
| rs7016302 | rs7025486 | rs7032946 | rs7040224 | rs7048915 | rs7072216 | rs7079298 | rs7088969 |
| rs7016529 | rs7025656 | rs7032974 | rs7040340 | rs7048945 | rs7072268 | rs707930  | rs7089122 |
| rs7017051 | rs7025665 | rs7033137 | rs7040344 | rs7049022 | rs7072338 | rs707938  | rs708915  |

|            |            |            |            |              |            |            |            |
|------------|------------|------------|------------|--------------|------------|------------|------------|
| rs7089306  | rs7098100  | rs7103863  | rs7111031  | rs71176136   | rs7123436  | rs71304101 | rs7134677  |
| rs7089424  | rs709822   | rs71039916 | rs7111153  | rs7117702    | rs7123454  | rs7130469  | rs7134738  |
| rs7089636  | rs7098322  | rs7104036  | rs71113051 | rs7117842    | rs7123489  | rs71304906 | rs7134784  |
| rs7089710  | rs7098573  | rs71041628 | rs7111341  | rs7117858    | rs7123749  | rs71304915 | rs71349703 |
| rs7089814  | rs7098640  | rs7104210  | rs7111520  | rs71178685   | rs7123876  | rs7130530  | rs7135039  |
| rs7089946  | rs7098710  | rs7104334  | rs71115649 | rs7117878    | rs7124301  | rs7130588  | rs71351177 |
| rs7089973  | rs7098825  | rs7104446  | rs7111582  | rs711793     | rs7124348  | rs7130652  | rs71351958 |
| rs7090078  | rs7098831  | rs7104764  | rs71118474 | rs7118132    | rs7124401  | rs7130753  | rs713522   |
| rs7090277  | rs7099048  | rs7104791  | rs71121058 | rs7118178    | rs7124615  | rs71307987 | rs71352238 |
| rs709029   | rs70991537 | rs7105056  | rs7112159  | rs7118275    | rs7124681  | rs7130826  | rs71352239 |
| rs7090367  | rs70992176 | rs71051385 | rs7112229  | rs7118294    | rs7124804  | rs7130870  | rs7135337  |
| rs7090445  | rs7099229  | rs710521   | rs711244   | rs711830     | rs7125     | rs7130881  | rs71353786 |
| rs7090504  | rs7099257  | rs7105851  | rs711245   | rs7118363    | rs7125115  | rs71311699 | rs71354106 |
| rs7090512  | rs7099339  | rs7105860  | rs7112513  | rs7118404    | rs7125196  | rs7131178  | rs7135417  |
| rs7090530  | rs70993900 | rs71059192 | rs7112925  | rs7118546    | rs7125498  | rs71311871 | rs71354939 |
| rs7090615  | rs7099692  | rs7105934  | rs7113019  | rs71186526   | rs7125588  | rs7131262  | rs71354995 |
| rs7090690  | rs7099771  | rs71060244 | rs7113056  | rs7118677    | rs7125978  | rs71313931 | rs71355297 |
| rs7090758  | rs7099822  | rs71061176 | rs7113096  | rs711869     | rs7126178  | rs71313932 | rs7135535  |
| rs7090871  | rs709984   | rs710629   | rs7113211  | rs7118902    | rs7126413  | rs7131440  | rs71355435 |
| rs7091181  | rs7099953  | rs71064315 | rs7113329  | rs7118982    | rs71266076 | rs7131442  | rs71356805 |
| rs7091821  | rs7100001  | rs7106446  | rs7113478  | rs71190156   | rs7126629  | rs71314970 | rs71357834 |
| rs7091853  | rs7100025  | rs7107004  | rs7113624  | rs7119038    | rs7126679  | rs7131509  | rs7135789  |
| rs7091871  | rs7100317  | rs7107174  | rs71138029 | rs71190381   | rs7126747  | rs7131627  | rs713584   |
| rs709208   | rs71003251 | rs7107356  | rs7113874  | rs7119167    | rs7126821  | rs71316863 | rs713586   |
| rs709209   | rs71007656 | rs7107455  | rs7113976  | rs71191701   | rs7126904  | rs7131691  | rs71358934 |
| rs709209-G | rs7100779  | rs7107560  | rs7114037  | rs7119498    | rs712707   | rs7131944  | rs71359461 |
| rs7092200  | rs7100851  | rs71075789 | rs71141481 | rs7119563    | rs7127129  | rs7132012  | rs713598   |
| rs7092536  | rs7101075  | rs7107726  | rs7114172  | rs71195783   | rs7127212  | rs71320321 | rs7135989  |
| rs7093309  | rs710122   | rs7107770  | rs7114362  | rs71196763   | rs7127214  | rs7132055  | rs7136086  |
| rs7093310  | rs71012974 | rs7107784  | rs7114403  | rs7119797    | rs7127307  | rs7132057  | rs7136223  |
| rs7093925  | rs7101609  | rs7107785  | rs7114842  | rs71198528,r | rs7127313  | rs71322200 | rs7136259  |
| rs7093975  | rs71016384 | rs7107912  | rs71148512 | s747888955   | rs7127383  | rs71322242 | rs71363019 |
| rs709400   | rs71016890 | rs71079573 | rs71148950 | rs711991     | rs7127399  | rs7132277  | rs7136373  |
| rs70940164 | rs710177   | rs7108020  | rs71149398 | rs7120118    | rs7127443  | rs7132280  | rs7136446  |
| rs70940197 | rs710187   | rs7108077  | rs7115013  | rs7120300    | rs7127580  | rs7132327  | rs7136456  |
| rs7094182  | rs7101940  | rs7108196  | rs7115027  | rs7120391    | rs7127590  | rs71324877 | rs7136506  |
| rs7094385  | rs7102     | rs71082144 | rs7115089  | rs712042     | rs71276077 | rs71324996 | rs7136716  |
| rs70944705 | rs71020333 | rs71083539 | rs7115190  | rs712048     | rs71277158 | rs71325088 | rs71367283 |
| rs70944707 | rs7102088  | rs710841   | rs7115200  | rs7120548    | rs7127743  | rs7132513  | rs7136732  |
| rs7094843  | rs710214   | rs7108441  | rs71152258 | rs7120737    | rs7127818  | rs71326918 | rs71367412 |
| rs7094871  | rs710216   | rs7108486  | rs7115242  | rs7120963    | rs7127900  | rs71326967 | rs71367544 |
| rs7094971  | rs710218   | rs71086466 | rs7115329  | rs71210632   | rs7127911  | rs713287   | rs71367545 |
| rs709498   | rs7102217  | rs7108738  | rs71153975 | rs7121112    | rs7127946  | rs7132908  | rs71368508 |
| rs7095034  | rs7102271  | rs7108857  | rs7115583  | rs7121365    | rs7128198  | rs71329093 | rs7137095  |
| rs7095087  | rs7102273  | rs710893   | rs7115672  | rs7121378    | rs7128325  | rs71330619 | rs7137149  |
| rs7095163  | rs71023121 | rs7108992  | rs7115703  | rs7121538    | rs7128382  | rs7133214  | rs7137190  |
| rs70953042 | rs7102350  | rs7109006  | rs7115753  | rs7121746    | rs7128648  | rs7133285  | rs71372253 |
| rs7095308  | rs710239   | rs710902   | rs7115813  | rs7121784    | rs7128762  | rs71333557 | rs713728   |
| rs7095607  | rs710241   | rs7109103  | rs7115856  | rs7121869    | rs7128926  | rs7133378  | rs71373084 |
| rs70958391 | rs7102454  | rs7109326  | rs7115956  | rs7121935    | rs7129204  | rs71334202 | rs71373621 |
| rs709591   | rs7102513  | rs7109376  | rs7116046  | rs7121958    | rs7129220  | rs71335811 | rs71373880 |
| rs7095953  | rs71026567 | rs710956   | rs71164546 | rs7121986    | rs7129320  | rs71336392 | rs71374020 |
| rs7095954  | rs7102705  | rs7109575  | rs7116495  | rs7122044    | rs7129527  | rs71336393 | rs71375338 |
| rs7096101  | rs7102710  | rs7109587  | rs7116641  | rs7122181    | rs712964   | rs71338792 | rs713763   |
| rs7096127  | rs71027236 | rs7110021  | rs7116797  | rs7122257    | rs71296770 | rs7133921  | rs7137749  |
| rs7096169  | rs710284   | rs7110373  | rs71170768 | rs7122422    | rs71296907 | rs7134009  | rs7137828  |
| rs7096311  | rs7102852  | rs7110547  | rs7117082  | rs7122539    | rs7129717  | rs7134035  | rs71378512 |
| rs709668   | rs7102934  | rs71105784 | rs7117140  | rs712255     | rs7129727  | rs7134060  | rs71378803 |
| rs7096715  | rs7103222  | rs7110738  | rs7117205  | rs712273     | rs71297631 | rs71340908 | rs7138000  |
| rs7096725  | rs7103246  | rs711076   | rs7117229  | rs7122817    | rs7129826  | rs7134150  | rs7138037  |
| rs7096822  | rs7103270  | rs7110786  | rs71172513 | rs7122937    | rs71298382 | rs7134375  | rs7138100  |
| rs7096937  | rs7103389  | rs7110818  | rs7117261  | rs7123034    | rs71299684 | rs7134419  | rs7138102  |
| rs7097017  | rs7103402  | rs711082   | rs71173313 | rs712315     | rs7129975  | rs7134472  | rs71381188 |
| rs7097397  | rs7103411  | rs7110863  | rs711737   | rs71231793   | rs7130078  | rs7134559  | rs71382075 |
| rs7097656  | rs7103543  | rs7110899  | rs7117514  | rs7123283    | rs71301807 | rs7134594  | rs7138216  |
| rs70977353 | rs71036221 | rs711098   | rs7117516  | rs7123402    | rs71302381 | rs7134599  | rs71382581 |
| rs7097780  | rs7103648  | rs7110984  | rs711752   | rs7123429    | rs7130284  | rs7134628  | rs71382583 |

|            |             |            |            |            |            |            |            |
|------------|-------------|------------|------------|------------|------------|------------|------------|
| rs71382995 | rs71420186  | rs71457711 | rs71503194 | rs7154982  | rs7159131  | rs7163757  | rs7169304  |
| rs7138300  | rs71420836  | rs71457718 | rs71503603 | rs71550013 | rs71591813 | rs71638255 | rs716936   |
| rs7138306  | rs71421178  | rs71458040 | rs71503800 | rs71550311 | rs71592686 | rs71638257 | rs7169584  |
| rs71383766 | rs71421258  | rs71458043 | rs7150701  | rs715505   | rs7159281  | rs7163838  | rs7169595  |
| rs71384258 | rs71421262  | rs7145882  | rs71507014 | rs71551364 | rs715948   | rs71638504 | rs7169601  |
| rs71384763 | rs71421264  | rs71459609 | rs71507180 | rs7155275  | rs71596787 | rs71639120 | rs7169629  |
| rs71385734 | rs7142143   | rs7146019  | rs71508903 | rs7155279  | rs71597109 | rs71639293 | rs7169796  |
| rs71385890 | rs714221546 | rs7146055  | rs7151024  | rs7155348  | rs7159760  | rs71640034 | rs7169799  |
| rs7138742  | rs71421553  | rs7146202  | rs71511786 | rs7155454  | rs71597752 | rs71640036 | rs71699779 |
| rs713875   | rs71421698  | rs71463523 | rs7151201  | rs7155504  | rs7159888  | rs7164067  | rs7170068  |
| rs7138803  | rs71422098  | rs7146395  | rs71512947 | rs71555635 | rs716013   | rs71641008 | rs7170165  |
| rs7138813  | rs71422190  | rs7146434  | rs71514273 | rs7155595  | rs71601486 | rs7164309  | rs7170398  |
| rs7138824  | rs71423566  | rs7146588  | rs7151505  | rs7155669  | rs7160151  | rs7164347  | rs7170463  |
| rs71389341 | rs7142386   | rs7146625  | rs7151526  | rs71556715 | rs71602617 | rs7164479  | rs7170637  |
| rs7138945  | rs71424213  | rs7146643  | rs715170   | rs71557345 | rs7160336  | rs71646142 | rs7170644  |
| rs7138947  | rs71424239  | rs71467219 | rs7151779  | rs71558361 | rs71603396 | rs71647013 | rs7170668  |
| rs71390213 | rs71424363  | rs71468072 | rs71518327 | rs71559014 | rs71603401 | rs71647019 | rs7170931  |
| rs7139079  | rs71425078  | rs71468663 | rs71518872 | rs71559051 | rs7160389  | rs71647020 | rs7170955  |
| rs71390846 | rs71426155  | rs71469216 | rs71519251 | rs71559067 | rs7160450  | rs7164727  | rs7171260  |
| rs713909   | rs71427097  | rs7146955  | rs71519637 | rs7155922  | rs7160525  | rs7164782  | rs7171405  |
| rs71391445 | rs71427690  | rs7146983  | rs71520386 | rs71559437 | rs71606723 | rs7164883  | rs71718386 |
| rs7139153  | rs71427857  | rs71470264 | rs7152223  | rs71559680 | rs7160726  | rs71649607 | rs7171864  |
| rs7139165  | rs71427874  | rs7147119  | rs7152277  | rs7156028  | rs71607666 | rs71649618 | rs7172038  |
| rs7139170  | rs71428218  | rs71471500 | rs71523448 | rs71560490 | rs71607999 | rs7165012  | rs7172118  |
| rs71392781 | rs7142902   | rs71472433 | rs71524263 | rs7156107  | rs7160860  | rs7165042  | rs7172205  |
| rs71393459 | rs7143026   | rs7147275  | rs71524421 | rs71562294 | rs7161194  | rs716508   | rs7172432  |
| rs71393921 | rs71431010  | rs7147308  | rs71525361 | rs71562508 | rs71612659 | rs716513   | rs7172615  |
| rs71394099 | rs7143218   | rs71473777 | rs7152623  | rs71562509 | rs7161323  | rs7165301  | rs7172677  |
| rs71394376 | rs7143361   | rs7147473  | rs71526274 | rs7156335  | rs7161418  | rs71653623 | rs7172947  |
| rs71394917 | rs7143516   | rs7147483  | rs71528371 | rs71563664 | rs7161424  | rs7165755  | rs7172971  |
| rs71395049 | rs71435601  | rs7147503  | rs71529004 | rs7156431  | rs71615297 | rs7165759  | rs7172979  |
| rs71395455 | rs7143623   | rs7147566  | rs7152906  | rs71564871 | rs7161578  | rs7165792  | rs7173086  |
| rs71396916 | rs71437272  | rs7147577  | rs71529289 | rs7156508  | rs7161596  | rs71658797 | rs7173389  |
| rs713978   | rs7143806   | rs7147636  | rs715300   | rs71565398 | rs7161799  | rs71659190 | rs7173461  |
| rs71397837 | rs7143840   | rs7147775  | rs7153027  | rs71565748 | rs716191   | rs7166069  | rs7173477  |
| rs71398138 | rs71439172  | rs71477837 | rs71530654 | rs7156625  | rs71619641 | rs7166081  | rs7173514  |
| rs7140     | rs7143919   | rs71478720 | rs71531304 | rs71566846 | rs7161968  | rs7166269  | rs7173565  |
| rs7140110  | rs7143933   | rs71480157 | rs715315   | rs71568191 | rs7162172  | rs7166271  | rs7173566  |
| rs71401677 | rs7143963   | rs7148069  | rs71531541 | rs71569047 | rs71621907 | rs7166287  | rs7173576  |
| rs7140266  | rs7144011   | rs714828   | rs71531849 | rs71569678 | rs7162222  | rs7166370  | rs7173595  |
| rs714027   | rs714417    | rs714830   | rs7153297  | rs7157006  | rs7162310  | rs71666203 | rs71736125 |
| rs7140285  | rs7144298   | rs714832   | rs7153315  | rs71571466 | rs71624037 | rs7166624  | rs7173724  |
| rs714052   | rs71443018  | rs71483681 | rs715338   | rs71572002 | rs71624106 | rs7166645  | rs7173743  |
| rs7140558  | rs7144329   | rs71483973 | rs71535075 | rs7157267  | rs71624119 | rs7166920  | rs7173833  |
| rs7140570  | rs7144361   | rs71485777 | rs715351   | rs71574648 | rs7162503  | rs7166927  | rs7173947  |
| rs71406254 | rs7144375   | rs71486610 | rs7153648  | rs71575448 | rs71625139 | rs7167152  | rs7173964  |
| rs7140705  | rs71444571  | rs7148739  | rs7153662  | rs71575922 | rs7162533  | rs716719   | rs7174062  |
| rs7140939  | rs71444682  | rs7148810  | rs7153665  | rs71576804 | rs7162542  | rs71673426 | rs7174138  |
| rs7140993  | rs7144510   | rs7148864  | rs71536939 | rs7157785  | rs7162556  | rs7167688  | rs7174222  |
| rs7141150  | rs7144602   | rs7148896  | rs71537331 | rs71578952 | rs71626484 | rs7167692  | rs7174445  |
| rs71411521 | rs71446481  | rs7148979  | rs71537559 | rs71580314 | rs71627581 | rs7167736  | rs7174574  |
| rs7141210  | rs7144654   | rs7149013  | rs71538127 | rs7158073  | rs71628140 | rs7167841  | rs71745963 |
| rs7141236  | rs71446622  | rs71490145 | rs71539572 | rs71581597 | rs7162815  | rs7167852  | rs7174878  |
| rs71413012 | rs71446935  | rs71490394 | rs7153959  | rs7158166  | rs71628645 | rs716804   | rs7175083  |
| rs7141307  | rs71447853  | rs7149169  | rs71542184 | rs7158218  | rs71628956 | rs7168238  | rs7175141  |
| rs71413877 | rs71450364  | rs71491832 | rs7154256  | rs7158239  | rs7162943  | rs7168331  | rs7175191  |
| rs71414193 | rs7145052   | rs7149242  | rs7154284  | rs7158300  | rs71629710 | rs7168348  | rs71753197 |
| rs71414197 | rs7145112   | rs7149262  | rs71542879 | rs71583822 | rs71631868 | rs716845   | rs7175324  |
| rs7141420  | rs714515    | rs71494791 | rs7154329  | rs71584509 | rs71632673 | rs716848   | rs71753454 |
| rs7141457  | rs7145159   | rs71494798 | rs71543920 | rs71584764 | rs71633358 | rs7168574  | rs7175346  |
| rs7141529  | rs71454237  | rs71494799 | rs71544650 | rs71585962 | rs71633359 | rs7168592  | rs7175361  |
| rs71415340 | rs714543    | rs71494802 | rs7154498  | rs71586027 | rs71635652 | rs716872   | rs7175472  |
| rs71415374 | rs71455229  | rs71495046 | rs7154563  | rs7158675  | rs71636778 | rs716877   | rs7175517  |
| rs7141912  | rs71455259  | rs71495049 | rs7154598  | rs7158754  | rs71636784 | rs7168886  | rs7175531  |
| rs7141943  | rs71455793  | rs71495423 | rs7154721  | rs71589039 | rs7163692  | rs71689248 | rs7175642  |
| rs714195   | rs71456318  | rs7149581  | rs7154769  | rs71590149 | rs71637264 | rs7168958  | rs7175692  |
| rs7141985  | rs71457130  | rs715      | rs71548373 | rs7159126  | rs7163730  | rs7169225  | rs7175718  |



|            |             |            |            |            |            |            |            |
|------------|-------------|------------|------------|------------|------------|------------|------------|
| rs7176058  | rs7183908   | rs7188873  | rs7195605  | rs7203324  | rs7210288  | rs7216064  | rs7221547  |
| rs7176074  | rs7183955   | rs7189020  | rs7195994  | rs72033857 | rs7210311  | rs7216173  | rs7221769  |
| rs7176106  | rs7183977   | rs7189122  | rs7196032  | rs7203398  | rs721048   | rs7216389  | rs7221807  |
| rs7176403  | rs7183988   | rs7189233  | rs71961113 | rs7203459  | rs7210545  | rs7216638  | rs7221878  |
| rs7176508  | rs7184046   | rs7189335  | rs7196129  | rs7203521  | rs7210574  | rs7216664  | rs7222     |
| rs7176527  | rs7184114   | rs7189389  | rs719615   | rs7203560  | rs7210990  | rs7216675  | rs7222039  |
| rs7176565  | rs7184253   | rs7189510  | rs7196195  | rs7203707  | rs7211043  | rs7216796  | rs7222046  |
| rs717662   | rs718426    | rs7189627  | rs7196298  | rs7203816  | rs7211132  | rs7216890  | rs72220602 |
| rs7176647  | rs718444    | rs7189864  | rs71963857 | rs720390   | rs7211246  | rs7217073  | rs7222178  |
| rs7177045  | rs7184522   | rs7189927  | rs7196583  | rs7203984  | rs7211294  | rs7217107  | rs7222450  |
| rs7177055  | rs7184597   | rs7189954  | rs7196720  | rs7204169  | rs721131   | rs7217226  | rs7222481  |
| rs7177266  | rs7184800   | rs7190     | rs7196789  | rs720419   | rs7211469  | rs7217264  | rs7222604  |
| rs7177338  | rs7184821   | rs7190256  | rs7196852  | rs7204230  | rs7211615  | rs7217268  | rs7222619  |
| rs7177657  | rs7184835   | rs71902577 | rs7196853  | rs7204270  | rs7211695  | rs7217460  | rs7222696  |
| rs717769   | rs7184847   | rs7190458  | rs7196953  | rs7204281  | rs7211723  | rs7217502  | rs7222712  |
| rs7177831  | rs718496    | rs7190551  | rs719700   | rs7204459  | rs721199   | rs7217523  | rs7222794  |
| rs7178196  | rs7185124   | rs71909380 | rs719714   | rs7204525  | rs7212062  | rs7217547  | rs7222801  |
| rs7178424  | rs718513    | rs7190997  | rs7197197  | rs7204669  | rs7212196  | rs72176750 | rs7222840  |
| rs7178572  | rs718515    | rs7191155  | rs719726   | rs720470   | rs7212408  | rs721772   | rs7222903  |
| rs7178615  | rs7185391   | rs7191183  | rs71973827 | rs720475   | rs7212416  | rs721778   | rs7222922  |
| rs7178762  | rs7185555   | rs7191269  | rs7197427  | rs7204751  | rs7212450  | rs7217891  | rs7222984  |
| rs7178801  | rs7185636   | rs7191397  | rs7197475  | rs7204797  | rs7212510  | rs7217900  | rs7223165  |
| rs71789978 | rs7185669   | rs7191427  | rs7197580  | rs720484   | rs7212578  | rs7217932  | rs722317   |
| rs7179134  | rs7185735   | rs7191439  | rs7197756  | rs720485   | rs7212590  | rs7217986  | rs7223311  |
| rs71793166 | rs7185949   | rs719148   | rs7197830  | rs7204864  | rs7212715  | rs7218014  | rs7223364  |
| rs7179475  | rs7185966   | rs719152   | rs719802   | rs7205341  | rs72127681 | rs7218235  | rs7223448  |
| rs7179486  | rs7186061   | rs7191623  | rs7198032  | rs7205514  | rs7212798  | rs721838   | rs7223465  |
| rs717996   | rs7186082   | rs71918322 | rs7198287  | rs7205804  | rs7212936  | rs7218453  | rs7223535  |
| rs7180002  | rs71861316  | rs7191868  | rs7198383  | rs7206303  | rs7212938  | rs7218457  | rs7223886  |
| rs7180079  | rs7186160   | rs71919754 | rs719839   | rs7206329  | rs7213086  | rs7218547  | rs7223966  |
| rs71801447 | rs7186298   | rs71920662 | rs7198595  | rs7206447  | rs7213095  | rs7218605  | rs722414   |
| rs7180247  | rs7186308   | rs7192140  | rs7198843  | rs7206608  | rs7213215  | rs7218647  | rs7224265  |
| rs7180804  | rs7186310   | rs7192161  | rs7198928  | rs7206699  | rs7213273  | rs72186592 | rs7224296  |
| rs7180823  | rs718641    | rs719260   | rs7199293  | rs7206790  | rs7213285  | rs7218675  | rs7224399  |
| rs718084   | rs71864257  | rs7192637  | rs7199513  | rs7206841  | rs7213347  | rs7218708  | rs7224548  |
| rs7180952  | rs7186520   | rs7192652  | rs7199601  | rs7206912  | rs7213526  | rs7218758  | rs7224610  |
| rs7181169  | rs7186635   | rs7192750  | rs7199766  | rs7206971  | rs7213608  | rs7218886  | rs7224660  |
| rs7181230  | rs7186799   | rs7192890  | rs7199790  | rs720727   | rs7213617  | rs7218928  | rs7224668  |
| rs718139   | rs7186831   | rs7193144  | rs7199794  | rs7207306  | rs7213721  | rs7219007  | rs7224685  |
| rs7181486  | rs7186834   | rs719316   | rs7199856  | rs7207400  | rs7213767  | rs7219014  | rs7224711  |
| rs7181498  | rs7186843   | rs7193263  | rs7199889  | rs7207466  | rs72138724 | rs7219033  | rs7224737  |
| rs7181555  | rs7186890   | rs7193275  | rs7199941  | rs7207591  | rs721399   | rs7219088  | rs7225002  |
| rs7181610  | rs7186893   | rs7193343  | rs7200153  | rs7207729  | rs7214041  | rs721917   | rs7225019  |
| rs7181649  | rs7186908   | rs7193402  | rs7200336  | rs7207826  | rs7214058  | rs7219213  | rs7225151  |
| rs7181659  | rs7187167   | rs7193413  | rs7200440  | rs720784   | rs7214227  | rs7219230  | rs7225165  |
| rs7181724  | rs7187191   | rs7193466  | rs7200543  | rs72079386 | rs7214248  | rs7219390  | rs7225219  |
| rs7181827  | rs7187250   | rs7193541  | rs7200589  | rs72083020 | rs7214267  | rs7219483  | rs722526   |
| rs7182018  | rs7187275   | rs7193665  | rs72007288 | rs7208487  | rs7214290  | rs7219520  | rs7225384  |
| rs7182216  | rs7187278   | rs7193778  | rs7200786  | rs7208815  | rs72143123 | rs7219669  | rs7225449  |
| rs7182229  | rs7187289   | rs719395   | rs7200801  | rs7208859  | rs7214509  | rs7219869  | rs7225451  |
| rs71822640 | rs7187513   | rs7194     | rs7200826  | rs7209300  | rs7214563  | rs7219992  | rs7225461  |
| rs71826849 | rs7187540   | rs7194319  | rs7200918  | rs7209400  | rs7214628  | rs7220340  | rs7225465  |
| rs7182742  | rs718766    | rs719440   | rs7201179  | rs7209435  | rs7214661  | rs7220401  | rs7225537  |
| rs7182874  | rs7187776   | rs7194615  | rs720130   | rs7209459  | rs7214663  | rs7220465  | rs7225700  |
| rs7182912  | rs7187910   | rs7194617  | rs7201518  | rs7209460  | rs7214743  | rs7220504  | rs7225703  |
| rs7182917  | rs7187961   | rs7194649  | rs7201895  | rs7209507  | rs7214750  | rs7220676  | rs7225843  |
| rs718294   | rs7187994   | rs7194734  | rs72020543 | rs7209581  | rs7215018  | rs7220711  | rs722585   |
| rs7182948  | rs7188071   | rs7194801  | rs7202116  | rs7209766  | rs7215055  | rs7220839  | rs722587   |
| rs7182976  | rs7188250   | rs7194804  | rs7202323  | rs7209801  | rs7215071  | rs7220854  | rs7225959  |
| rs7182990  | rs7188272   | rs7195278  | rs7202566  | rs7209826  | rs7215084  | rs7220870  | rs722599   |
| rs718314   | rs7188378   | rs7195286  | rs7202714  | rs720989   | rs7215310  | rs7221059  | rs7226020  |
| rs7183196  | rs7188406   | rs7195287  | rs7202829  | rs7210086  | rs72156956 | rs7221109  | rs722637   |
| rs7183206  | rs7188445   | rs7195296  | rs7202844  | rs7210100  | rs7215775  | rs7221118  | rs72264263 |
| rs7183263  | rs7188697   | rs7195329  | rs7202877  | rs7210118  | rs721579   | rs7221167  | rs7226575  |
| rs7183417  | rs7188697-G | rs7195386  | rs720300   | rs7210142  | rs7215815  | rs722122   | rs7226608  |
| rs71835930 | rs7188859   | rs7195559  | rs7203132  | rs7210152  | rs7215879  | rs7221299  | rs7226824  |
| rs7183604  | rs7188861   | rs7195563  | rs72031595 | rs721023   | rs7215990  | rs7221322  | rs7226831  |

|            |            |            |            |            |            |             |            |
|------------|------------|------------|------------|------------|------------|-------------|------------|
| rs722685   | rs723730   | rs7244849  | rs7250982  | rs7256062  | rs72617242 | rs72644599  | rs72664303 |
| rs7226855  | rs7237444  | rs72449396 | rs7251     | rs7256111  | rs72618637 | rs72646508  | rs72664305 |
| rs7226979  | rs7237783  | rs72449624 | rs7251031  | rs725613   | rs72618695 | rs72647336  | rs72664324 |
| rs7227069  | rs7237942  | rs7245004  | rs7251111  | rs7256148  | rs72620089 | rs72647484  | rs72664335 |
| rs7227255  | rs7238033  | rs7245273  | rs7251251  | rs725616   | rs72621438 | rs7264802   | rs72664829 |
| rs722726   | rs7238078  | rs7245565  | rs7251363  | rs7256197  | rs72622559 | rs72648830  | rs72664840 |
| rs7227272  | rs7238093  | rs7245672  | rs7251505  | rs7256200  | rs72622926 | rs72648854  | rs72664935 |
| rs7227483  | rs72382362 | rs724577   | rs7251615  | rs7256311  | rs72623120 | rs72648871  | rs72665000 |
| rs7227810  | rs723835   | rs7245860  | rs7251640  | rs7256564  | rs72623176 | rs72648998- | rs72665129 |
| rs7227892  | rs7238397  | rs7245983  | rs7251730  | rs725660   | rs72624911 | T           | rs72665334 |
| rs7227893  | rs7238484  | rs724608   | rs7251806  | rs7256653  | rs72624976 | rs72649373  | rs72665697 |
| rs7228029  | rs72387598 | rs724609   | rs7251815  | rs725670   | rs72625023 | rs72649546  | rs726657   |
| rs7228085  | rs7238896  | rs7246099  | rs7252007  | rs725677   | rs72625132 | rs726502    | rs72665715 |
| rs7228101  | rs7239114  | rs724623   | rs7252126  | rs7256776  | rs72626215 | rs72650616  | rs7266642  |
| rs7228141  | rs7239484  | rs7246440  | rs7252185  | rs7256794  | rs72627233 | rs72650673  | rs72666886 |
| rs7228159  | rs7239564  | rs7246617  | rs7252328  | rs7256818  | rs72627489 | rs72650832  | rs72666941 |
| rs72284621 | rs7239568  | rs7246841  | rs7252372  | rs7256920  | rs72627509 | rs72651379  | rs72667460 |
| rs722895   | rs7239575  | rs7246865  | rs7252428  | rs7257     | rs726281   | rs72651454  | rs72667737 |
| rs7228974  | rs723968   | rs7247241  | rs7252453  | rs7257250  | rs72628504 | rs72651487  | rs72668171 |
| rs7229351  | rs7239867  | rs7247317  | rs7252505  | rs7257285  | rs72628656 | rs72652703  | rs72669198 |
| rs7229520  | rs7239883  | rs7247349  | rs7252778  | rs7257932  | rs726288   | rs72653060  | rs72669450 |
| rs7229639  | rs7240004  | rs7247412  | rs7253094  | rs7258015  | rs72629024 | rs72653424  | rs72669744 |
| rs7229869  | rs724016   | rs724744   | rs7253117  | rs7258029  | rs72629670 | rs72654472  | rs72670321 |
| rs7230240  | rs7240205  | rs724745   | rs7253433  | rs7258031  | rs72630041 | rs72654647  | rs72671456 |
| rs723048   | rs7240256  | rs7247614  | rs725344   | rs7258249  | rs7263028  | rs72654902  | rs72671483 |
| rs7230704  | rs7240405  | rs7247659  | rs725348   | rs7258309  | rs72630421 | rs7265519   | rs72671655 |
| rs72307178 | rs7240432  | rs72477006 | rs7253490  | rs7258465  | rs72630911 | rs72655575  | rs72671718 |
| rs7231404  | rs72405174 | rs724781   | rs7253584  | rs725860   | rs72630922 | rs7265567   | rs72673097 |
| rs723149   | rs724055   | rs7247903  | rs7253703  | rs725861   | rs72631105 | rs72655796  | rs72673419 |
| rs72315235 | rs7240682  | rs7247962  | rs7253706  | rs7258950  | rs7263120  | rs72656010  | rs72673442 |
| rs7231555  | rs7240767  | rs7247977  | rs7253820  | rs7259004  | rs72631343 | rs72656017  | rs72673461 |
| rs7231696  | rs7240777  | rs7248006  | rs7253870  | rs7259070  | rs72631567 | rs72656192  | rs7267348  |
| rs7231748  | rs7240948  | rs72480273 | rs7253959  | rs7259090  | rs72632294 | rs72656645  | rs72673538 |
| rs7231852  | rs724120   | rs72480748 | rs7254067  | rs7259119  | rs72632736 | rs72657797  | rs72673540 |
| rs7231880  | rs7241221  | rs7248104  | rs7254068  | rs7259317  | rs72632979 | rs72658071  | rs72673588 |
| rs7232     | rs7241264  | rs7248169  | rs7254114  | rs7259325  | rs72633697 | rs72658302  | rs72673891 |
| rs72320093 | rs7241530  | rs7248205  | rs7254263  | rs7259376  | rs72634030 | rs72658365  | rs72673947 |
| rs7232516  | rs724154   | rs72482130 | rs725456   | rs7259484  | rs72634258 | rs72658409  | rs72674867 |
| rs72327719 | rs7241572  | rs7248239  | rs7254560  | rs7259572  | rs72634501 | rs72658860  | rs72674898 |
| rs7232775  | rs7241743  | rs72483203 | rs7254723  | rs725959   | rs72634682 | rs72658930  | rs72675531 |
| rs72328411 | rs7241918  | rs72484727 | rs7254729  | rs7259620  | rs72634819 | rs7265992   | rs72675573 |
| rs7232918  | rs7241993  | rs72486027 | rs7254776  | rs7259714  | rs72635188 | rs72659998  | rs7267595  |
| rs7233512  | rs7242036  | rs7248710  | rs7254827  | rs725976   | rs72635657 | rs7266      | rs7267607  |
| rs723355   | rs7242063  | rs7249     | rs7254836  | rs7259861  | rs72635790 | rs72660103  | rs7267618  |
| rs7233634  | rs72422730 | rs7249081  | rs7254892  | rs7259965  | rs72636644 | rs72660136  | rs72677052 |
| rs7233920  | rs7242518  | rs7249331  | rs7254911  | rs7260110  | rs72636697 | rs7266028   | rs72677177 |
| rs72339224 | rs7242701  | rs7249415  | rs7254961  | rs7260184  | rs72636758 | rs72660319  | rs72677209 |
| rs7234128  | rs7242858  | rs72495198 | rs7255     | rs7260330  | rs72637739 | rs72660443  | rs72677343 |
| rs723427   | rs724286   | rs7249565  | rs7255045  | rs7260340  | rs72638977 | rs72660683  | rs7267752  |
| rs7234864  | rs7242873  | rs7249578  | rs7255066  | rs7260359  | rs72638978 | rs72660908  | rs7267759  |
| rs7235010  | rs7242902  | rs7249692  | rs7255083  | rs7260380  | rs72638986 | rs72660919  | rs72677850 |
| rs723527   | rs7243110  | rs7249758  | rs725518   | rs726046   | rs72639203 | rs72661322  | rs72677917 |
| rs7235757  | rs7243203  | rs7249921  | rs7255223  | rs7260465  | rs72640211 | rs72661391  | rs72678242 |
| rs723585   | rs7243332  | rs7249925  | rs7255229  | rs7260482  | rs72640287 | rs72661392  | rs72678531 |
| rs723588   | rs7243357  | rs7250000  | rs725529   | rs7260538  | rs72640321 | rs72661397  | rs72678864 |
| rs7235890  | rs72434280 | rs7250071  | rs7255293  | rs7260629  | rs72640504 | rs72661605  | rs72679151 |
| rs7235891  | rs7243437  | rs72501962 | rs7255303  | rs72607124 | rs72641011 | rs72661730  | rs72679199 |
| rs7236090  | rs7243439  | rs72501964 | rs7255374  | rs72607398 | rs7264113  | rs72661887  | rs72679504 |
| rs7236339  | rs7243566  | rs7250367  | rs72553883 | rs7260871  | rs72641551 | rs72662240  | rs7267979  |
| rs7236492  | rs7243785  | rs7250377  | rs7255436  | rs72613226 | rs72641832 | rs72662902  | rs72680380 |
| rs7236548  | rs7243821  | rs72504922 | rs72555385 | rs72613227 | rs72641835 | rs72663045  | rs72681000 |
| rs7236575  | rs7244     | rs7250689  | rs7255601  | rs72613567 | rs72642263 | rs72663503  | rs72681211 |
| rs7236869  | rs724411   | rs7250835  | rs7255661  | rs72613886 | rs72643433 | rs72663520  | rs72681628 |
| rs7236902  | rs7244202  | rs72508457 | rs7255672  | rs7261425  | rs72643557 | rs72663537  | rs72681698 |
| rs7237102  | rs7244739  | rs7250849  | rs7255720  | rs72615157 | rs72643819 | rs72663907  | rs72681760 |
| rs723714   | rs7244810  | rs7250869  | rs7255933  | rs72615558 | rs7264396  | rs72663955  | rs72681825 |
| rs7237204  | rs72448466 | rs72509155 | rs7256047  | rs726170   | rs72644085 | rs726640    | rs72681869 |

|            |            |            |            |            |            |            |            |
|------------|------------|------------|------------|------------|------------|------------|------------|
| rs726824   | rs72700829 | rs72720396 | rs72738786 | rs72749841 | rs72765283 | rs72781671 | rs727957   |
| rs72682433 | rs7270101  | rs72720485 | rs72738834 | rs72749982 | rs72765298 | rs72781679 | rs72796106 |
| rs72682840 | rs72702209 | rs72721168 | rs72738949 | rs72750185 | rs72765466 | rs72781680 | rs72796152 |
| rs72683001 | rs72702268 | rs72721631 | rs72739469 | rs727505   | rs72765564 | rs72781699 | rs72796367 |
| rs72683129 | rs72702561 | rs72721770 | rs72740088 | rs727511   | rs72765671 | rs72782675 | rs72796401 |
| rs72683785 | rs72702742 | rs72722286 | rs72740408 | rs72751336 | rs72765759 | rs72782676 | rs72796402 |
| rs72683786 | rs72702813 | rs72722978 | rs72740410 | rs72751339 | rs72766530 | rs72782727 | rs72796869 |
| rs72683923 | rs72702900 | rs72722993 | rs72740550 | rs72751936 | rs72766607 | rs72782806 | rs72797396 |
| rs72684232 | rs72703147 | rs7272323  | rs72740637 | rs7275208  | rs72766630 | rs72783094 | rs72797568 |
| rs72684536 | rs72703210 | rs72724130 | rs72740699 | rs7275212  | rs72766638 | rs72783884 | rs72797733 |
| rs72684636 | rs72703614 | rs72725119 | rs72740818 | rs72752279 | rs72767016 | rs72784146 | rs72798404 |
| rs726857   | rs72704050 | rs72725156 | rs72740932 | rs72752371 | rs7276737  | rs72784452 | rs72798422 |
| rs72687362 | rs72704117 | rs72725158 | rs72740955 | rs72752884 | rs72767881 | rs72784625 | rs72798731 |
| rs72687745 | rs72704264 | rs72725174 | rs72740964 | rs72753349 | rs72767980 | rs72784651 | rs72798738 |
| rs7268790  | rs72704330 | rs72725224 | rs72741014 | rs72753548 | rs72767997 | rs7278468  | rs72798770 |
| rs72688070 | rs72704531 | rs72725608 | rs72741048 | rs72753908 | rs72768092 | rs72784719 | rs72798941 |
| rs72688441 | rs72704611 | rs72725854 | rs72741057 | rs7275394  | rs72768580 | rs727851   | rs72799107 |
| rs72688980 | rs72704658 | rs72725879 | rs72741249 | rs72754248 | rs72768626 | rs72785129 | rs7279911  |
| rs72689147 | rs72704791 | rs72725929 | rs72741274 | rs7275426  | rs72768642 | rs72785217 | rs72799126 |
| rs72689399 | rs7270518  | rs72726027 | rs72741332 | rs72754914 | rs72769124 | rs72785461 | rs72799142 |
| rs72690486 | rs72705193 | rs72726037 | rs7274134  | rs72754919 | rs727694   | rs727857   | rs72799190 |
| rs72690737 | rs72705338 | rs72726051 | rs7274168  | rs72754938 | rs72770483 | rs72786007 | rs72799198 |
| rs72691108 | rs72705895 | rs72726129 | rs72741684 | rs72755130 | rs7277076  | rs72786098 | rs727993   |
| rs72691122 | rs72706424 | rs72726582 | rs72742394 | rs72755190 | rs72770776 | rs72786276 | rs72799341 |
| rs7269123  | rs72706669 | rs72727394 | rs72742475 | rs72755233 | rs72771049 | rs72786644 | rs72799426 |
| rs72691294 | rs72706690 | rs72728705 | rs72742677 | rs72755295 | rs72771256 | rs72786786 | rs72799568 |
| rs72691637 | rs72707308 | rs72728734 | rs72742684 | rs72755439 | rs72771512 | rs72786903 | rs7279968  |
| rs72692804 | rs72707344 | rs7272884  | rs72742734 | rs72755643 | rs7277157  | rs72787511 | rs7279974  |
| rs72692805 | rs72707650 | rs72729582 | rs727428   | rs727563   | rs72771598 | rs72787520 | rs72800029 |
| rs72692823 | rs72708008 | rs72729610 | rs72743115 | rs7275640  | rs72771696 | rs72787535 | rs72800245 |
| rs72692840 | rs72708013 | rs72729623 | rs72743158 | rs72757062 | rs72771860 | rs72787555 | rs7280064  |
| rs72692842 | rs72708144 | rs7272983  | rs72743160 | rs72757182 | rs72772025 | rs72787559 | rs7280071  |
| rs72692916 | rs72708162 | rs72729847 | rs72743199 | rs72757283 | rs72772427 | rs72787718 | rs72800733 |
| rs72693130 | rs72708239 | rs72730235 | rs72743461 | rs72758052 | rs72772496 | rs72787719 | rs72800905 |
| rs72694240 | rs727088   | rs72730918 | rs72743477 | rs72758394 | rs727726   | rs72787730 | rs72801026 |
| rs72694255 | rs72709458 | rs72731149 | rs72743481 | rs72758637 | rs72773323 | rs72787764 | rs72801445 |
| rs72694263 | rs72709516 | rs72731415 | rs72743610 | rs72758836 | rs727734   | rs72788286 | rs72801474 |
| rs72694269 | rs72709517 | rs72731535 | rs72743974 | rs72758878 | rs72773411 | rs72788321 | rs728017   |
| rs72694393 | rs72709560 | rs72731537 | rs72744944 | rs72759215 | rs72773563 | rs72789541 | rs72801843 |
| rs72694438 | rs727100   | rs7273174  | rs72744945 | rs72759273 | rs72773790 | rs72789626 | rs72802342 |
| rs72694479 | rs72710803 | rs72731954 | rs72745623 | rs72759285 | rs72773891 | rs72789910 | rs72802358 |
| rs72694622 | rs72711245 | rs72732234 | rs72745804 | rs72759286 | rs72773978 | rs7279002  | rs72802365 |
| rs72694845 | rs72711354 | rs727324   | rs7274581  | rs72759609 | rs72774059 | rs72790070 | rs72802696 |
| rs72694951 | rs72712030 | rs72732487 | rs7274668  | rs72759880 | rs72774609 | rs72790085 | rs72802806 |
| rs72695645 | rs7271240  | rs72732565 | rs72746704 | rs72759890 | rs72774870 | rs72790163 | rs72803112 |
| rs72696011 | rs72712459 | rs7273292  | rs72746773 | rs72760562 | rs72774885 | rs72790288 | rs72803115 |
| rs72696282 | rs72712511 | rs72732974 | rs7274697  | rs72760655 | rs72774916 | rs727903   | rs7280330  |
| rs72697295 | rs72713385 | rs72732986 | rs72747074 | rs72760962 | rs72775778 | rs72790386 | rs72803314 |
| rs72698115 | rs72713618 | rs727331   | rs7274718  | rs72761269 | rs72776049 | rs72790443 | rs72803383 |
| rs72698179 | rs72713719 | rs72733235 | rs72747526 | rs72761270 | rs72776098 | rs72790862 | rs72803397 |
| rs72698368 | rs727139   | rs727333   | rs727479   | rs72761442 | rs7277642  | rs72791200 | rs72803684 |
| rs72698571 | rs72714236 | rs72733826 | rs72748034 | rs72761606 | rs72776440 | rs72791317 | rs72804453 |
| rs72698718 | rs72714270 | rs72733928 | rs72748085 | rs72761985 | rs72776445 | rs72792276 | rs72804575 |
| rs72698720 | rs72714919 | rs727341   | rs7274811  | rs72762175 | rs72776472 | rs72792324 | rs72804706 |
| rs72698721 | rs7271530  | rs7273470  | rs72748110 | rs72762188 | rs72777347 | rs72792395 | rs72804786 |
| rs72698722 | rs7271624  | rs72735627 | rs72748148 | rs72762209 | rs7277800  | rs72792829 | rs72804857 |
| rs72699185 | rs72716328 | rs72736802 | rs72748160 | rs72762373 | rs7277882  | rs72793213 | rs72805220 |
| rs72699186 | rs72716342 | rs72737101 | rs72748330 | rs72762705 | rs72779066 | rs72793278 | rs728054   |
| rs72699188 | rs72716951 | rs7273775  | rs72748935 | rs72763113 | rs72779210 | rs72793414 | rs72805613 |
| rs72699818 | rs72717150 | rs72737821 | rs72749016 | rs72763141 | rs72779222 | rs7279347  | rs72805692 |
| rs72699855 | rs72717436 | rs7273787  | rs7274963  | rs72763380 | rs72779695 | rs72793573 | rs72806318 |
| rs72699866 | rs72717751 | rs72738288 | rs72749676 | rs72763822 | rs72780191 | rs72793807 | rs7280640  |
| rs72699870 | rs72718211 | rs72738689 | rs72749713 | rs727644   | rs72780746 | rs72793812 | rs72806698 |
| rs72700114 | rs72718281 | rs72738704 | rs72749754 | rs72764483 | rs72780760 | rs72793967 | rs72806909 |
| rs72700118 | rs72719193 | rs72738718 | rs72749770 | rs72764753 | rs72781632 | rs72794538 | rs72807203 |
| rs7270028  | rs72719796 | rs72738732 | rs72749772 | rs72764821 | rs72781665 | rs72795008 | rs72807485 |
| rs72700609 | rs72719803 | rs72738736 | rs72749773 | rs72765272 | rs72781667 | rs72795121 | rs72807818 |

|            |            |            |            |            |            |            |            |
|------------|------------|------------|------------|------------|------------|------------|------------|
| rs72808287 | rs72824753 | rs72834687 | rs72847482 | rs72883760 | rs72907660 | rs72932523 | rs7296498  |
| rs72808780 | rs72824756 | rs72834694 | rs72847487 | rs7288411  | rs72908667 | rs72932540 | rs7296503  |
| rs72809169 | rs7282490  | rs72834698 | rs72847500 | rs72884306 | rs7290979  | rs72932563 | rs72965213 |
| rs72809171 | rs72824905 | rs72834751 | rs72847884 | rs72885774 | rs7290980  | rs72932578 | rs729654   |
| rs72809176 | rs72825038 | rs72834823 | rs72848121 | rs72885809 | rs72910057 | rs72932713 | rs72965482 |
| rs72809177 | rs72825193 | rs72834846 | rs72848251 | rs72886316 | rs72910063 | rs72932727 | rs729663   |
| rs72809349 | rs7282525  | rs72834856 | rs72848971 | rs728864   | rs72910629 | rs72932729 | rs72966564 |
| rs72809818 | rs72825713 | rs72835045 | rs72848980 | rs7288670  | rs72912147 | rs72933970 | rs72966926 |
| rs7280982  | rs72825751 | rs72835070 | rs72850040 | rs72887152 | rs72912510 | rs72934505 | rs72967735 |
| rs72809988 | rs72825929 | rs72835078 | rs72851023 | rs72888328 | rs7291412  | rs72934535 | rs72969726 |
| rs72810089 | rs72825990 | rs72835315 | rs72851229 | rs72888404 | rs7291444  | rs72934570 | rs72969820 |
| rs72810550 | rs7282609  | rs72835956 | rs72851476 | rs72888603 | rs72914576 | rs72934583 | rs7297051  |
| rs72810771 | rs72826094 | rs72835984 | rs72851898 | rs72888803 | rs72915163 | rs72934623 | rs7297175  |
| rs72810983 | rs7282639  | rs72836318 | rs72852338 | rs72888817 | rs72915557 | rs72934760 | rs7297206  |
| rs72811294 | rs72826719 | rs72836344 | rs72853300 | rs7288964  | rs72915668 | rs72935795 | rs7297265  |
| rs72811310 | rs72826852 | rs72836345 | rs72853511 | rs728900   | rs72915955 | rs72936304 | rs72972965 |
| rs72812052 | rs72826962 | rs72836346 | rs7285377  | rs72890325 | rs72915971 | rs72936314 | rs72973711 |
| rs72812078 | rs72827176 | rs72836348 | rs728538   | rs72890842 | rs72916230 | rs72936629 | rs72973714 |
| rs72812393 | rs7282733  | rs72836349 | rs72853828 | rs7289126  | rs729167   | rs72938078 | rs7297374  |
| rs72812846 | rs72827369 | rs72836561 | rs72853903 | rs72891717 | rs72917317 | rs72938304 | rs7297416  |
| rs72812861 | rs72827480 | rs72836608 | rs72854138 | rs72892121 | rs72917504 | rs72938315 | rs72975088 |
| rs72813153 | rs72827503 | rs7283707  | rs72854462 | rs72892124 | rs72917514 | rs72938846 | rs729761   |
| rs72813180 | rs72827839 | rs72837670 | rs72855633 | rs72892431 | rs72917533 | rs72939920 | rs72976751 |
| rs72813607 | rs7282784  | rs72837687 | rs72855749 | rs728926   | rs72917544 | rs72941051 | rs72976945 |
| rs72813970 | rs72827873 | rs72837690 | rs7285579  | rs72892910 | rs729183   | rs72941618 | rs72976986 |
| rs72814432 | rs72827910 | rs72837788 | rs72856836 | rs72893182 | rs7291841  | rs72942485 | rs72976995 |
| rs7281463  | rs72828224 | rs72837816 | rs72857612 | rs72893199 | rs72918744 | rs729437   | rs72977000 |
| rs72814839 | rs72828247 | rs72837826 | rs72858533 | rs72893340 | rs72919450 | rs72944032 | rs72977016 |
| rs72815139 | rs72828283 | rs7283798  | rs72859280 | rs72896637 | rs72920755 | rs72944064 | rs72977282 |
| rs72815193 | rs72828517 | rs72838078 | rs72860361 | rs72897838 | rs729210   | rs72944180 | rs72977586 |
| rs72815507 | rs72828532 | rs72838129 | rs728616   | rs7289855  | rs72921443 | rs72944758 | rs72977594 |
| rs7281554  | rs72828533 | rs72838588 | rs72862280 | rs72898831 | rs72922276 | rs729448   | rs72977827 |
| rs72815624 | rs72828540 | rs72838936 | rs728635   | rs7289932  | rs7292268  | rs72945224 | rs7297799  |
| rs72815640 | rs72828815 | rs72840032 | rs728637   | rs72899452 | rs72924800 | rs72945305 | rs72977992 |
| rs7281587  | rs72828890 | rs72840788 | rs72865183 | rs72899729 | rs72925845 | rs72945659 | rs72978712 |
| rs72816333 | rs72828935 | rs7284108  | rs72865212 | rs72899820 | rs72925996 | rs72945685 | rs72979233 |
| rs72816448 | rs72829007 | rs72841270 | rs7286550  | rs72900220 | rs72926475 | rs7294592  | rs72979712 |
| rs72817287 | rs72829144 | rs72841279 | rs7286601  | rs72901750 | rs72926772 | rs72946301 | rs72979977 |
| rs72817412 | rs72829173 | rs72841368 | rs7286621  | rs72901753 | rs72926932 | rs72948115 | rs72980836 |
| rs72817857 | rs72829264 | rs72841868 | rs72866768 | rs72901754 | rs72926946 | rs7294822  | rs72980962 |
| rs72818110 | rs72829446 | rs72841879 | rs7286685  | rs72901758 | rs72926970 | rs7294862  | rs72981516 |
| rs72819118 | rs72829706 | rs72841887 | rs72867280 | rs72902139 | rs72926982 | rs72948836 | rs72981675 |
| rs72819191 | rs72829754 | rs72841902 | rs72868727 | rs72902175 | rs72926986 | rs7294902  | rs72981680 |
| rs72819571 | rs72829841 | rs72842306 | rs72868839 | rs72902177 | rs7292706  | rs7294919  | rs72981683 |
| rs72820264 | rs72829857 | rs72842813 | rs7286917  | rs72902523 | rs72927075 | rs7294943  | rs72981684 |
| rs72820274 | rs72830000 | rs72842819 | rs7287010  | rs7290364  | rs72927479 | rs7295014  | rs72981698 |
| rs72820455 | rs72830427 | rs72843145 | rs72871339 | rs72903956 | rs72928038 | rs72950188 | rs72982003 |
| rs72820961 | rs72830848 | rs72843166 | rs72871627 | rs72904190 | rs72928605 | rs7295056  | rs72982156 |
| rs72821122 | rs72831343 | rs72843198 | rs72872126 | rs72904209 | rs72928978 | rs72951506 | rs72982400 |
| rs7282122  | rs72831344 | rs72843280 | rs7287312  | rs72904286 | rs72929172 | rs72951831 | rs72982840 |
| rs72821233 | rs72831345 | rs72843506 | rs728739   | rs72904737 | rs7292939  | rs72951954 | rs72982934 |
| rs72821787 | rs72831855 | rs72843781 | rs72874178 | rs72904749 | rs72929920 | rs72953382 | rs72982988 |
| rs72821884 | rs72832230 | rs72843867 | rs72874231 | rs72904932 | rs72929935 | rs72953532 | rs72983394 |
| rs72822411 | rs7283257  | rs72843895 | rs72875462 | rs729050   | rs72930155 | rs72953990 | rs72983508 |
| rs72823013 | rs72832584 | rs72843902 | rs72876037 | rs72905046 | rs729302   | rs72954323 | rs72983513 |
| rs72823014 | rs72832859 | rs72844534 | rs7287609  | rs72905701 | rs72930293 | rs72956618 | rs72983521 |
| rs72823020 | rs72832896 | rs72844546 | rs72876954 | rs72906060 | rs72930621 | rs7295765  | rs72983853 |
| rs72823057 | rs72833096 | rs72844590 | rs72877579 | rs72906064 | rs72930659 | rs72958256 | rs7298509  |
| rs72823192 | rs72833417 | rs72844762 | rs72878024 | rs72906124 | rs72930755 | rs72959041 | rs7298532  |
| rs72823412 | rs72833429 | rs7284558  | rs72878142 | rs72906130 | rs72930763 | rs72961007 | rs7298565  |
| rs72823439 | rs72833466 | rs72845655 | rs7287943  | rs729062   | rs72930774 | rs72961133 | rs72986630 |
| rs7282349  | rs72833470 | rs72845660 | rs72880146 | rs72906315 | rs72930904 | rs72962169 | rs7298732  |
| rs72823592 | rs72834043 | rs72845663 | rs72880429 | rs72906356 | rs72931748 | rs7296313  | rs7298751  |
| rs72823628 | rs72834074 | rs72845807 | rs72881017 | rs72906474 | rs72931768 | rs72963976 | rs72987587 |
| rs72823641 | rs72834327 | rs72845888 | rs72881110 | rs72906582 | rs72932177 | rs72964181 | rs729876   |
| rs72823804 | rs72834448 | rs7284681  | rs72881254 | rs72906810 | rs72932183 | rs72964564 | rs7298766  |
| rs72824427 | rs72834453 | rs72847212 | rs72881923 | rs72907046 | rs72932350 | rs72964692 | rs7298820  |

|            |            |            |            |            |            |            |            |
|------------|------------|------------|------------|------------|------------|------------|------------|
| rs7298909  | rs73015011 | rs73039077 | rs73059724 | rs73078357 | rs7310615  | rs73133136 | rs73156502 |
| rs72989297 | rs73015016 | rs73039434 | rs73059725 | rs73078367 | rs7310698  | rs7313352  | rs7315695  |
| rs72989401 | rs73015021 | rs73039898 | rs73059726 | rs73078622 | rs73107473 | rs73133996 | rs7315731  |
| rs72989863 | rs73015024 | rs73039946 | rs7306001  | rs73078636 | rs73107980 | rs73135175 | rs731575   |
| rs7299019  | rs730153   | rs73040036 | rs73060317 | rs73078824 | rs73108238 | rs73135307 | rs73157695 |
| rs7299037  | rs73015714 | rs7304081  | rs7306114  | rs73079003 | rs73108566 | rs73135369 | rs73158188 |
| rs72990604 | rs730158   | rs73041705 | rs73061632 | rs73079004 | rs73108788 | rs7313556  | rs73158393 |
| rs72990858 | rs73015965 | rs73041845 | rs73062378 | rs73079014 | rs73109050 | rs73135595 | rs73158427 |
| rs7299139  | rs73016289 | rs73042687 | rs7306275  | rs73079476 | rs73109224 | rs73136572 | rs73158705 |
| rs72991443 | rs7301634  | rs7304270  | rs7306322  | rs7308002  | rs7310929  | rs7313668  | rs73158817 |
| rs72992015 | rs7301677  | rs7304278  | rs73064179 | rs73080339 | rs73109480 | rs73137144 | rs73159014 |
| rs72992070 | rs73017364 | rs73043037 | rs730643   | rs73080452 | rs73109811 | rs73137384 | rs73159098 |
| rs72992130 | rs73017394 | rs73043051 | rs7306438  | rs73080726 | rs73110464 | rs7313745  | rs73159540 |
| rs7299271  | rs73017399 | rs73043117 | rs73064425 | rs73080767 | rs7311105  | rs7313782  | rs7315956  |
| rs72992766 | rs730180   | rs73043857 | rs7306455  | rs7308105  | rs73111535 | rs7313797  | rs73161324 |
| rs72993045 | rs73018185 | rs7304462  | rs73065147 | rs73081364 | rs73111541 | rs73138006 | rs73161420 |
| rs72993073 | rs7301826  | rs73044813 | rs73065472 | rs73081554 | rs7311160  | rs73138150 | rs7316170  |
| rs72993796 | rs7301953  | rs73045269 | rs73066226 | rs73081656 | rs73112142 | rs7313852  | rs73161745 |
| rs72993806 | rs73019876 | rs73045691 | rs73066442 | rs730819   | rs73112274 | rs7313874  | rs73161772 |
| rs7299436  | rs73020545 | rs73045960 | rs73066485 | rs7308214  | rs73112473 | rs7313895  | rs73162480 |
| rs72995085 | rs7302127  | rs7304603  | rs7306710  | rs73082325 | rs73114181 | rs73139022 | rs73162998 |
| rs7299523  | rs73021449 | rs73046311 | rs73067509 | rs73082357 | rs73114543 | rs73139025 | rs73163783 |
| rs72995548 | rs7302200  | rs73046410 | rs7306755  | rs73082363 | rs73114872 | rs73139029 | rs7316454  |
| rs72995641 | rs73022822 | rs73046792 | rs7306779  | rs73082474 | rs7311541  | rs73139123 | rs73164714 |
| rs72996108 | rs73022874 | rs73047068 | rs7306812  | rs73082723 | rs7311607  | rs73139257 | rs73165060 |
| rs72996113 | rs73023520 | rs73047073 | rs73068228 | rs730831   | rs7311622  | rs73139272 | rs73165361 |
| rs72996119 | rs73024215 | rs73047488 | rs73068325 | rs7308380  | rs73116822 | rs73139274 | rs73165526 |
| rs72997390 | rs73024730 | rs73048030 | rs73068339 | rs73084574 | rs73116829 | rs73139938 | rs73165962 |
| rs72997616 | rs73025192 | rs73048339 | rs73068448 | rs73085315 | rs73116951 | rs73140002 | rs7316626  |
| rs72997623 | rs73025516 | rs73048404 | rs73068459 | rs73085586 | rs73117594 | rs7314031  | rs73166548 |
| rs72997672 | rs73025532 | rs7304860  | rs73068668 | rs73085637 | rs73117792 | rs7314056  | rs73166630 |
| rs729982   | rs73025562 | rs73048966 | rs73069021 | rs7308584  | rs73117911 | rs73141547 | rs73167082 |
| rs72999033 | rs73026242 | rs73049252 | rs73069193 | rs73085996 | rs7311856  | rs73141567 | rs73167342 |
| rs7299922  | rs73026723 | rs73049276 | rs73069541 | rs73086541 | rs73119306 | rs7314227  | rs73167517 |
| rs7299943  | rs73026775 | rs7304954  | rs73069846 | rs73087085 | rs7311936  | rs73142294 | rs73167519 |
| rs72999449 | rs73027016 | rs730497   | rs73069940 | rs7308752  | rs7311970  | rs7314285  | rs73167871 |
| rs7300001  | rs7302816  | rs73049928 | rs73070113 | rs7308827  | rs7311982  | rs73142879 | rs73167875 |
| rs73000929 | rs73028848 | rs73050286 | rs7307053  | rs73088360 | rs7312105  | rs73143584 | rs73167972 |
| rs73000965 | rs73028974 | rs730506   | rs73071352 | rs7308864  | rs7312112  | rs73143793 | rs731681   |
| rs73001065 | rs7302925  | rs73050865 | rs7307156  | rs7308872  | rs73121277 | rs73144210 | rs73168105 |
| rs7300117  | rs73029259 | rs73050959 | rs73071612 | rs73089379 | rs7312132  | rs73144267 | rs7316878  |
| rs7300146  | rs73029263 | rs73052033 | rs73072483 | rs7309     | rs73121433 | rs7314457  | rs73168819 |
| rs7300162  | rs73029563 | rs7305242  | rs73072491 | rs73091214 | rs73121716 | rs73146095 | rs73168962 |
| rs7300275  | rs7302975  | rs73052804 | rs7307263  | rs73091252 | rs73123076 | rs731465   | rs73169065 |
| rs7300312  | rs7302981  | rs73052859 | rs73072664 | rs7309382  | rs73123449 | rs73146904 | rs73169094 |
| rs73003836 | rs73030120 | rs73053487 | rs7307277  | rs7309426  | rs73123462 | rs73148102 | rs73169175 |
| rs7300422  | rs73030145 | rs73053542 | rs73073007 | rs73094281 | rs73123652 | rs73148965 | rs7316962  |
| rs73004967 | rs73030321 | rs73053559 | rs73073176 | rs73094438 | rs7312464  | rs7314943  | rs73169678 |
| rs73005426 | rs7303035  | rs73053851 | rs73073235 | rs73094710 | rs73124945 | rs731498   | rs7316983  |
| rs73005768 | rs73030851 | rs7305424  | rs73073686 | rs73094874 | rs73125247 | rs7314987  | rs73169830 |
| rs73005873 | rs73032363 | rs7305461  | rs73073694 | rs73094911 | rs73125628 | rs731499   | rs7317038  |
| rs73006822 | rs73033340 | rs73055442 | rs73074811 | rs7309492  | rs7312625  | rs7315028  | rs73170558 |
| rs73007975 | rs73033536 | rs73055556 | rs73074830 | rs73095129 | rs7312766  | rs73151974 | rs731707   |
| rs73008229 | rs73033560 | rs7305618  | rs7307510  | rs73095857 | rs7312774  | rs7315236  | rs731708   |
| rs73008259 | rs73034263 | rs7305678  | rs73075492 | rs7309619  | rs7312879  | rs73152651 | rs73170826 |
| rs73008357 | rs73034295 | rs730570   | rs73075609 | rs73096474 | rs7312919  | rs7315280  | rs73171158 |
| rs73009436 | rs730356   | rs7305701  | rs73075656 | rs7309743  | rs73129298 | rs7315286  | rs73171706 |
| rs7301013  | rs73035723 | rs73057087 | rs73075659 | rs7309849  | rs7312955  | rs73152900 | rs73173340 |
| rs73011343 | rs7303595  | rs73057184 | rs7307613  | rs73099222 | rs73130305 | rs7315361  | rs73173548 |
| rs73011950 | rs73036517 | rs73057397 | rs73076581 | rs73099903 | rs73130739 | rs73153655 | rs73173591 |
| rs730123   | rs73036519 | rs73058028 | rs73076965 | rs73100693 | rs7313075  | rs73154149 | rs73173954 |
| rs730126   | rs73036520 | rs73058052 | rs73076966 | rs73101498 | rs73132094 | rs7315438  | rs73174306 |
| rs73012738 | rs73037168 | rs73058498 | rs73077157 | rs73102769 | rs7313220  | rs73154884 | rs73174309 |
| rs73013176 | rs73037426 | rs73058705 | rs73077175 | rs73103335 | rs73132375 | rs73155600 | rs73174345 |
| rs73013270 | rs7303747  | rs73058713 | rs7307775  | rs7310409  | rs7313259  | rs7315593  | rs731749   |
| rs73013527 | rs73038319 | rs73059722 | rs7307780  | rs73105827 | rs73132848 | rs7315607  | rs73175081 |
| rs73013664 | rs730384   | rs73059723 | rs73078305 | rs73106136 | rs73132911 | rs73156468 | rs73175083 |

|            |            |             |            |            |            |            |            |
|------------|------------|-------------|------------|------------|------------|------------|------------|
| rs73175572 | rs73195040 | rs73219118  | rs73235136 | rs73294447 | rs73366713 | rs73436803 | rs73550818 |
| rs731758   | rs73195553 | rs73219351  | rs73235147 | rs73294470 | rs73367233 | rs73437358 | rs73554000 |
| rs73176188 | rs73196098 | rs73219758  | rs7323613  | rs73294488 | rs7336891  | rs73440215 | rs735542   |
| rs73176199 | rs73196739 | rs73219805  | rs73236188 | rs7329483  | rs7336933  | rs73440283 | rs7355953  |
| rs73176670 | rs73196840 | rs73219806  | rs7323755  | rs7329599  | rs73369896 | rs73445186 | rs7356     |
| rs73176930 | rs73197294 | rs73220177  | rs732381   | rs73296215 | rs733710   | rs73447108 | rs7356034  |
| rs7317761  | rs73197345 | rs73220188  | rs73238130 | rs732990   | rs73371569 | rs73449401 | rs73563812 |
| rs73177866 | rs73197346 | rs73220190  | rs73238169 | rs7329958  | rs73371707 | rs73451523 | rs7356536  |
| rs7317804  | rs73198917 | rs73220476  | rs73239280 | rs732999   | rs73371737 | rs73453125 | rs7356611  |
| rs73178508 | rs73199442 | rs73220544  | rs73239895 | rs7330209  | rs7337175  | rs734553   | rs735665   |
| rs73178598 | rs73200114 | rs73220641  | rs73240624 | rs73306860 | rs73375614 | rs73455693 | rs73568641 |
| rs73178638 | rs73200209 | rs73220980  | rs73241342 | rs73306888 | rs7337573  | rs734559   | rs7357039  |
| rs73178769 | rs73200691 | rs73221116  | rs73241997 | rs73306896 | rs7337610  | rs73456411 | rs73571445 |
| rs73179053 | rs73200740 | rs73221443  | rs73242648 | rs7330796  | rs73376544 | rs73457437 | rs73575095 |
| rs73179655 | rs7320104  | rs73221538  | rs73243351 | rs7331212  | rs7337692  | rs73457936 | rs73577318 |
| rs73181210 | rs73201521 | rs73221553  | rs73243398 | rs73313052 | rs73376930 | rs734586   | rs7357754  |
| rs73181516 | rs73201545 | rs73221556  | rs73243607 | rs7331420  | rs7337911  | rs734597   | rs73577882 |
| rs731820   | rs7320168  | rs73221597  | rs73243608 | rs73316435 | rs73381355 | rs7346     | rs73578101 |
| rs73182221 | rs73201772 | rs7322160   | rs7324365  | rs7331776  | rs7338138  | rs73460075 | rs73578186 |
| rs73182224 | rs73201933 | rs73221948  | rs73243877 | rs733190   | rs73382439 | rs73461870 | rs73578509 |
| rs73182377 | rs73202341 | rs73222236  | rs73243890 | rs7332     | rs733830   | rs73464505 | rs73579370 |
| rs7318247  | rs73202945 | rs73222243  | rs7324464  | rs7332115  | rs7338461  | rs73464507 | rs73581580 |
| rs7318250  | rs73203043 | rs732223431 | rs73245728 | rs73325511 | rs73386640 | rs734663   | rs73581685 |
| rs731831   | rs73203066 | rs73224020  | rs7324708  | rs7332608  | rs7338758  | rs734674   | rs7358269  |
| rs73183643 | rs73203093 | rs73224404  | rs73249175 | rs73326661 | rs7338774  | rs73467599 | rs7358418  |
| rs731839   | rs73203938 | rs73224492  | rs7325116  | rs7332672  | rs73388146 | rs7347500  | rs7358633  |
| rs73184014 | rs73204034 | rs73224656  | rs732526   | rs7332724  | rs73388841 | rs73477270 | rs735877   |
| rs73184528 | rs73204208 | rs73224659  | rs732527   | rs73329476 | rs7338963  | rs734780   | rs73591976 |
| rs73186030 | rs7320453  | rs73224660  | rs73252814 | rs7333181  | rs73390981 | rs73479996 | rs7359225  |
| rs73186036 | rs73205303 | rs73225255  | rs7325564  | rs733324   | rs73391993 | rs73480560 | rs73593810 |
| rs7318607  | rs73205708 | rs73225807  | rs732563   | rs7333277  | rs733920   | rs73488486 | rs7359387  |
| rs731862   | rs7320598  | rs73225842  | rs7325747  | rs733331   | rs73392700 | rs73489336 | rs7359397  |
| rs73186813 | rs73206033 | rs73225861  | rs732594   | rs7333354  | rs7339274  | rs7349311  | rs73594554 |
| rs73187218 | rs73206583 | rs73226103  | rs7325960  | rs7333559  | rs73393498 | rs7349332  | rs73594556 |
| rs73187247 | rs73206626 | rs73226194  | rs73260443 | rs7333607  | rs73395580 | rs73494666 | rs735949   |
| rs73187288 | rs73207888 | rs73226260  | rs73260456 | rs7333647  | rs73396340 | rs73495598 | rs735951   |
| rs7318746  | rs73208061 | rs73226528  | rs73260919 | rs733381   | rs73396548 | rs7349623  | rs735955   |
| rs73187605 | rs73208120 | rs73226617  | rs7326331  | rs73338697 | rs73396800 | rs7349819  | rs7359623  |
| rs73187787 | rs732083   | rs73227498  | rs732638   | rs7333969  | rs73397619 | rs73498309 | rs73596816 |
| rs73187850 | rs73208473 | rs732278    | rs73264674 | rs73339979 | rs73403005 | rs734999   | rs73601548 |
| rs7318817  | rs73208958 | rs73227823  | rs73265633 | rs7334050  | rs73403121 | rs73501572 | rs73605614 |
| rs73188321 | rs73208983 | rs73228208  | rs73265749 | rs7334078  | rs73403830 | rs7350438  | rs73606718 |
| rs73188943 | rs73209413 | rs73228360  | rs73266310 | rs733415   | rs73405293 | rs7350477  | rs73606754 |
| rs7318906  | rs73210009 | rs73228424  | rs73266316 | rs7334370  | rs73405691 | rs7350481  | rs73607075 |
| rs73189192 | rs73210523 | rs73228543  | rs7326773  | rs73344808 | rs73405966 | rs73504817 | rs736107   |
| rs73189617 | rs73211754 | rs7322872   | rs7326822  | rs73344830 | rs73406759 | rs735052   | rs7361098  |
| rs73189972 | rs73212053 | rs7322908   | rs7326825  | rs7334486  | rs7340705  | rs73507245 | rs73611258 |
| rs73190080 | rs73212431 | rs73229090  | rs73270847 | rs73347525 | rs734073   | rs7350789  | rs73611371 |
| rs7319045  | rs7321274  | rs73229101  | rs732716   | rs73349058 | rs73407797 | rs73508199 | rs73611722 |
| rs7319075  | rs73212804 | rs73229728  | rs7327286  | rs73349318 | rs734095   | rs73508476 | rs73619441 |
| rs7319102  | rs73212812 | rs73230079  | rs7327381  | rs73350117 | rs73410251 | rs735092   | rs73621225 |
| rs73191188 | rs7321285  | rs73230245  | rs7327539  | rs7335046  | rs73413596 | rs7351050  | rs7362397  |
| rs73191218 | rs73212868 | rs7323027   | rs73275566 | rs73351608 | rs73414214 | rs735120   | rs7362398  |
| rs73191227 | rs73212896 | rs73231003  | rs7327945  | rs73351820 | rs73415453 | rs73512407 | rs73624696 |
| rs73191242 | rs73213010 | rs73231956  | rs7327960  | rs73352129 | rs73415912 | rs73517714 | rs73624724 |
| rs73191311 | rs73213393 | rs73231994  | rs7328064  | rs7335338  | rs73416724 | rs73518807 | rs736264   |
| rs73191547 | rs73213484 | rs73232185  | rs7328203  | rs73354194 | rs73417722 | rs73519353 | rs73626749 |
| rs7319172  | rs73213501 | rs73232740  | rs73283869 | rs73354327 | rs7341927  | rs73529860 | rs736281   |
| rs73192004 | rs73214164 | rs73232881  | rs73284431 | rs7335710  | rs73419621 | rs73536079 | rs736289   |
| rs73192103 | rs73214903 | rs73233620  | rs73285914 | rs73358088 | rs7342028  | rs73536951 | rs73631501 |
| rs73192197 | rs7321596  | rs73234116  | rs7328626  | rs733592   | rs73422097 | rs735396   | rs73633938 |
| rs73192202 | rs73216700 | rs73234132  | rs7328654  | rs733594   | rs7342306  | rs73541184 | rs73635312 |
| rs73192442 | rs73216832 | rs73234178  | rs73288156 | rs73359714 | rs7342537  | rs735459   | rs736374   |
| rs73193808 | rs7321688  | rs73234189  | rs73289263 | rs7335976  | rs7342694  | rs73547001 | rs73639400 |
| rs73193841 | rs73216963 | rs7323428   | rs73290427 | rs733626   | rs73427834 | rs73547611 | rs7364132  |
| rs73194058 | rs732172   | rs7323466   | rs7329174  | rs73365510 | rs7342889  | rs73547906 | rs73642097 |
| rs73194495 | rs73217470 | rs73234901  | rs7329302  | rs73366469 | rs73429770 | rs7354849  | rs73643713 |

|            |            |            |            |            |            |            |            |
|------------|------------|------------|------------|------------|------------|------------|------------|
| rs73645429 | rs73730372 | rs7384878  | rs7396835  | rs740516   | rs74180505 | rs742757   | rs7433864  |
| rs73646205 | rs73730377 | rs738491   | rs73969326 | rs74053129 | rs7418101  | rs742760   | rs743398   |
| rs736471   | rs7373065  | rs738527   | rs7396943  | rs74053152 | rs74181220 | rs742762   | rs74340015 |
| rs7364724  | rs737337   | rs73855810 | rs739704   | rs7405404  | rs74181299 | rs74276531 | rs74340846 |
| rs73648455 | rs737338   | rs73856768 | rs7397059  | rs7405453  | rs741813   | rs74277390 | rs7434143  |
| rs73649983 | rs73735248 | rs7385804  | rs7397189  | rs74056034 | rs74181389 | rs74280151 | rs743417   |
| rs7365     | rs73736735 | rs73858679 | rs7397586  | rs7405635  | rs7418300  | rs7428052  | rs74345525 |
| rs73650963 | rs73736914 | rs7386     | rs73975588 | rs74056359 | rs74183647 | rs7428218  | rs74346567 |
| rs7365151  | rs73739621 | rs73862213 | rs7397906  | rs740567   | rs74187143 | rs7428232  | rs7434753  |
| rs73652622 | rs7374004  | rs73862862 | rs739815   | rs7405743  | rs7418865  | rs7428430  | rs74354194 |
| rs7365380  | rs73740310 | rs7386762  | rs739816   | rs7405776  | rs741917   | rs7428484  | rs74354286 |
| rs73655199 | rs73742434 | rs738722   | rs73982435 | rs74057888 | rs7419274  | rs7428496  | rs7435469  |
| rs73656147 | rs73742436 | rs73872717 | rs7398375  | rs7405847  | rs741951   | rs7428670  | rs74357745 |
| rs7366048  | rs73742446 | rs73874335 | rs739842   | rs7406     | rs741958   | rs7428796  | rs743580   |
| rs73660574 | rs73743323 | rs73875019 | rs739846   | rs74060469 | rs7419612  | rs7428843  | rs74358338 |
| rs73661334 | rs73744859 | rs73884850 | rs73985893 | rs740605   | rs7420021  | rs7428883  | rs74361312 |
| rs7366355  | rs7374540  | rs73885319 | rs7398606  | rs7406170  | rs742013   | rs7428918  | rs74364334 |
| rs73664188 | rs7374731  | rs738875   | rs73987603 | rs7406485  | rs7420166  | rs74289478 | rs74364822 |
| rs73664373 | rs7374732  | rs73887965 | rs73989053 | rs7406690  | rs74203182 | rs74290525 | rs74365834 |
| rs73664374 | rs7375216  | rs73893380 | rs7398996  | rs7406910  | rs742071   | rs7429186  | rs74366100 |
| rs73667301 | rs737534   | rs7389783  | rs73991560 | rs74069551 | rs7420812  | rs74292032 | rs7436887  |
| rs73668018 | rs73754057 | rs73898513 | rs739954   | rs740698   | rs7420881  | rs7429279  | rs74370218 |
| rs73670309 | rs73754158 | rs73900579 | rs73997493 | rs740746   | rs74209703 | rs7429308  | rs74373890 |
| rs73671497 | rs73754267 | rs739091   | rs739997   | rs740750   | rs7421089  | rs7429588  | rs74375025 |
| rs73671843 | rs73759508 | rs73909848 | rs7400002  | rs740753   | rs7421123  | rs7429614  | rs743757   |
| rs73675825 | rs737665   | rs739187   | rs74001662 | rs74085345 | rs742127   | rs74298199 | rs743760   |
| rs736801   | rs73766540 | rs73920681 | rs74001718 | rs74086911 | rs742132   | rs7429990  | rs74377791 |
| rs736820   | rs737693   | rs73921512 | rs740047   | rs740893   | rs7421388  | rs743002   | rs74378591 |
| rs736825   | rs7377083  | rs73923009 | rs7400722  | rs74090351 | rs742230   | rs7430523  | rs7437961  |
| rs73682817 | rs737721   | rs73925103 | rs74007800 | rs7409148  | rs7422339  | rs7430565  | rs7438     |
| rs73683128 | rs73772144 | rs73925218 | rs74011415 | rs74091672 | rs74225573 | rs7430651  | rs74380195 |
| rs73684276 | rs73774722 | rs73925236 | rs74013337 | rs74091739 | rs7422667  | rs74308953 | rs74382443 |
| rs73685918 | rs7378179  | rs73925240 | rs7401414  | rs74093831 | rs74227709 | rs7430950  | rs7438414  |
| rs73688764 | rs73782827 | rs73925443 | rs740157   | rs74106749 | rs742320   | rs7431278  | rs74384554 |
| rs7368883  | rs73786772 | rs7392584  | rs74015707 | rs741070   | rs7423358  | rs743134   | rs7438704  |
| rs736893   | rs7378773  | rs73926277 | rs740160   | rs741090   | rs74233809 | rs7431531  | rs74388387 |
| rs73692310 | rs737901   | rs73928486 | rs74018128 | rs741094   | rs7423572  | rs74315329 | rs7438888  |
| rs73700340 | rs737902   | rs73928741 | rs74022964 | rs7410943  | rs7423615  | rs74315875 | rs7439032  |
| rs73701100 | rs73790670 | rs73931391 | rs74024059 | rs74113493 | rs74237094 | rs7431604  | rs74390814 |
| rs73702564 | rs73794390 | rs7393251  | rs74025622 | rs74113717 | rs7424096  | rs7431710  | rs7439150  |
| rs737037   | rs737945   | rs73933237 | rs74025655 | rs74115822 | rs7424120  | rs743185   | rs74392582 |
| rs73705514 | rs737948   | rs73937410 | rs74025667 | rs741172   | rs7424771  | rs7431936  | rs7439324  |
| rs73708054 | rs737954   | rs739385   | rs7402939  | rs74119445 | rs74249229 | rs7431952  | rs74394007 |
| rs7370843  | rs73802707 | rs739414   | rs7402977  | rs74119759 | rs742493   | rs74320127 | rs74394067 |
| rs737092   | rs73803919 | rs7394152  | rs7402982  | rs7412     | rs74249949 | rs74320437 | rs7439493  |
| rs73713131 | rs738084   | rs7394190  | rs7402983  | rs7412010  | rs74250734 | rs74321310 | rs74395607 |
| rs73715668 | rs738086   | rs7394259  | rs7402990  | rs74120306 | rs7425093  | rs74322702 | rs7439567  |
| rs7371606  | rs738140   | rs739427   | rs740311   | rs741226   | rs7425274  | rs7432375  | rs74397018 |
| rs73718779 | rs738144   | rs73943852 | rs7403279  | rs7412308  | rs74253465 | rs7432379  | rs74397112 |
| rs73719807 | rs738146   | rs7394579  | rs7403531  | rs741273   | rs7425436  | rs7432427  | rs7439923  |
| rs73719811 | rs73818525 | rs7394655  | rs74035505 | rs7412746  | rs7425446  | rs743271   | rs743998   |
| rs73719951 | rs738222   | rs739496   | rs74035506 | rs74131475 | rs74256604 | rs7432782  | rs74401481 |
| rs73721664 | rs73831575 | rs739525   | rs74035509 | rs74142329 | rs74257369 | rs74328111 | rs74402020 |
| rs73721673 | rs73831818 | rs73954926 | rs7403810  | rs741475   | rs74259971 | rs74328314 | rs74402361 |
| rs7372217  | rs738321   | rs7395513  | rs7403957  | rs74148699 | rs7426056  | rs7432993  | rs74403919 |
| rs7372321  | rs7383287  | rs7395581  | rs740406   | rs74157123 | rs742631   | rs7433076  | rs74408817 |
| rs73725598 | rs7383388  | rs7395662  | rs7404095  | rs7416513  | rs74263644 | rs74331022 | rs74409360 |
| rs73726531 | rs73837363 | rs7395670  | rs740417   | rs741677   | rs7426380  | rs74331120 | rs744103   |
| rs737267   | rs7383856  | rs7395791  | rs7404202  | rs741702   | rs742642   | rs743316   | rs74411266 |
| rs73727605 | rs73840240 | rs73959582 | rs7404301  | rs741738   | rs74266318 | rs74331971 | rs74412485 |
| rs73728279 | rs738408   | rs73959590 | rs74043845 | rs74175027 | rs7426688  | rs7433284  | rs74412765 |
| rs73728611 | rs738409   | rs7396140  | rs7404696  | rs7417952  | rs74267027 | rs7433306  | rs74414571 |
| rs73728618 | rs73843290 | rs73961845 | rs740474   | rs74179959 | rs74267315 | rs74333499 | rs744153   |
| rs73729083 | rs738450   | rs7396592  | rs7404754  | rs74179972 | rs74269006 | rs74333950 | rs74415461 |
| rs73729087 | rs73845427 | rs73966422 | rs7404843  | rs74180173 | rs7427073  | rs74334864 | rs74415683 |
| rs73729220 | rs738469   | rs7396753  | rs7404928  | rs74180212 | rs7427439  | rs74334916 | rs74416281 |
| rs7372960  | rs7384722  | rs7396827  | rs740495   | rs741804   | rs7427564  | rs74338595 | rs744166   |

|            |             |             |             |             |             |             |             |
|------------|-------------|-------------|-------------|-------------|-------------|-------------|-------------|
| rs74417235 | rs74487757  | rs74567345  | rs7464506   | rs74710200  | rs74802342  | rs74871039  | rs74929281  |
| rs74417947 | rs74489103  | rs745680717 | rs7464572   | rs74710229  | rs74802478  | rs7487237   | rs74929644  |
| rs7441808  | rs744910    | rs745699188 | rs746463    | rs74710412  | rs748026492 | rs7487314   | rs749314    |
| rs74419120 | rs7449161   | rs7457728   | rs746491    | rs74710884  | rs7480395   | rs7487365   | rs749319    |
| rs74419430 | rs7449334   | rs74577409  | rs74650166  | rs74715904  | rs74804370  | rs74873827  | rs7493429   |
| rs74419455 | rs74494415  | rs74580701  | rs74652506  | rs747171037 | rs74804697  | rs74874233  | rs7493524   |
| rs74422681 | rs7449443   | rs745817551 | rs74652944  | rs747189731 | rs7480524   | rs7487435   | rs74936745  |
| rs7442295  | rs7449561   | rs745821    | rs74653330  | rs7472405   | rs74805556  | rs7487683   | rs749368    |
| rs74424378 | rs74497536  | rs745822    | rs74653672  | rs747249    | rs74809038  | rs74877435  | rs74942078  |
| rs744253   | rs74498370  | rs745829328 | rs74653713  | rs74735086  | rs74809942  | rs74877722  | rs7494379   |
| rs7442660  | rs74498987  | rs74586549  | rs7465401   | rs74735576  | rs748113    | rs748779    | rs74944275  |
| rs7442779  | rs74500135  | rs74589258  | rs74654316  | rs74742132  | rs74811610  | rs7487827   | rs74944857  |
| rs74428614 | rs74504435  | rs74592222  | rs74654358  | rs74742820  | rs7481219   | rs7487854   | rs74949966  |
| rs7442885  | rs74505413  | rs745932882 | rs746549124 | rs74745018  | rs74813029  | rs7487866   | rs7495033   |
| rs74429170 | rs7450706   | rs7459675   | rs7465621   | rs747462    | rs74815160  | rs748802    | rs749512116 |
| rs74431709 | rs74507380  | rs74597329  | rs74661587  | rs74747621  | rs74815407  | rs748832    | rs74951270  |
| rs74431741 | rs745086    | rs745974379 | rs74661798  | rs74748843  | rs7481584   | rs74884082  | rs7495132   |
| rs744373   | rs74508725  | rs745976    | rs7466269   | rs74750282  | rs74817271  | rs74887316  | rs74951723  |
| rs74438085 | rs7451008   | rs745977    | rs746627    | rs7475279   | rs7481951   | rs7488780   | rs749526    |
| rs74439044 | rs7451021   | rs7459838   | rs74664507  | rs74753072  | rs748196    | rs7488791   | rs749526610 |
| rs74439972 | rs7451726   | rs7459846   | rs74664784  | rs7475335   | rs7481960   | rs74888405  | rs7495653   |
| rs7444     | rs74520550  | rs7459897   | rs74664822  | rs7475348   | rs74821481  | rs74888443  | rs74956615  |
| rs74440003 | rs7452125   | rs7459916   | rs746652558 | rs74754250  | rs74821708  | rs74888921  | rs7495694   |
| rs74440730 | rs7452200   | rs746008566 | rs74665267  | rs74757509  | rs748244464 | rs7488974   | rs74956940  |
| rs7444191  | rs74523012  | rs7460090   | rs74666984  | rs747578    | rs7482510   | rs74891390  | rs749571546 |
| rs74442473 | rs74524365  | rs7460106   | rs746673    | rs74758148  | rs74825300  | rs748919    | rs7495737   |
| rs7444282  | rs74526869  | rs746011    | rs746698    | rs74758196  | rs7482541   | rs74894391  | rs7495833   |
| rs7444298  | rs74527054  | rs7460121   | rs7467117   | rs74758868  | rs74826997  | rs74895226  | rs74959315  |
| rs7444313  | rs74531549  | rs74601585  | rs74672008  | rs7475916   | rs748273    | rs74895481  | rs74959615  |
| rs74443493 | rs745318    | rs7460226   | rs746748    | rs7476      | rs7482876   | rs748959644 | rs74960997  |
| rs74444445 | rs74532386  | rs7460469   | rs74675536  | rs747601    | rs7482884   | rs74896528  | rs7496259   |
| rs74444983 | rs74536181  | rs74606343  | rs74676292  | rs74760947  | rs7482891   | rs74897213  | rs7496293   |
| rs74447607 | rs74537277  | rs74606487  | rs74676654  | rs7476192   | rs7482894   | rs74899442  | rs7496308   |
| rs74449336 | rs7453812   | rs746073    | rs74676686  | rs74762505  | rs7483027   | rs74900413  | rs74963256  |
| rs7445     | rs7453836   | rs74612091  | rs74676712  | rs74764079  | rs74830391  | rs74900445  | rs7496362   |
| rs74450593 | rs74538397  | rs74612335  | rs74677340  | rs747650    | rs748326686 | rs74900775  | rs74966104  |
| rs744507   | rs745386    | rs74614333  | rs74677442  | rs747657    | rs74834049  | rs74902775  | rs749670    |
| rs74450753 | rs7453920   | rs74614808  | rs74677637  | rs747694    | rs74834332  | rs74904971  | rs749671    |
| rs7445169  | rs745398820 | rs74615093  | rs74677756  | rs747719483 | rs7483477   | rs749052    | rs74967706  |
| rs74452128 | rs7454108   | rs746154778 | rs74677818  | rs74772720  | rs74835610  | rs749067572 | rs749694    |
| rs74453786 | rs74543909  | rs74617384  | rs74679312  | rs74773190  | rs74836424  | rs74910171  | rs7497026   |
| rs74453875 | rs74543960  | rs74621719  | rs7468236   | rs74773701  | rs748366    | rs74910819  | rs74971332  |
| rs74454529 | rs74544416  | rs74621754  | rs746839    | rs74774746  | rs7483689   | rs74910854  | rs74971894  |
| rs74454622 | rs74544699  | rs74625164  | rs746872    | rs747759    | rs7483826   | rs74910874  | rs7497304   |
| rs74455974 | rs745448634 | rs74625883  | rs7468800   | rs747780    | rs7483863   | rs74911261  | rs74973608  |
| rs74456742 | rs74545339  | rs746258907 | rs7468826   | rs747782    | rs7484147   | rs74912790  | rs74974099  |
| rs7445832  | rs745468425 | rs7462612   | rs74688707  | rs74778687  | rs748431    | rs749128918 | rs74974549  |
| rs74458816 | rs745480    | rs746265    | rs7469124   | rs74778900  | rs74843651  | rs74913239  | rs74974644  |
| rs744600   | rs745486    | rs74628114  | rs74692061  | rs747792    | rs7484541   | rs74913373  | rs749761903 |
| rs74461473 | rs74549401  | rs746303202 | rs74693546  | rs74780677  | rs748455    | rs74913549  | rs74977054  |
| rs744617   | rs7454964   | rs7463166   | rs74693727  | rs747836085 | rs74846209  | rs749140768 | rs749780    |
| rs74462621 | rs745496705 | rs7463186   | rs74697736  | rs747844459 | rs74847330  | rs74914310  | rs7497961   |
| rs744653   | rs745502811 | rs7463212   | rs746979180 | rs74786007  | rs74848787  | rs74915527  | rs74979875  |
| rs74468293 | rs74550407  | rs74632205  | rs7469817   | rs74787922  | rs74848904  | rs749170    | rs7498008   |
| rs7446877  | rs74551598  | rs74633073  | rs74699275  | rs74788384  | rs74854988  | rs74917683  | rs7498044   |
| rs7447257  | rs74552897  | rs7463447   | rs74699469  | rs74789101  | rs7485509   | rs74918997  | rs74980679  |
| rs74472890 | rs74555583  | rs74636831  | rs747003    | rs74789436  | rs7485577   | rs749214    | rs749846    |
| rs74472919 | rs745558    | rs7463814   | rs74701635  | rs74791047  | rs7485656   | rs74921826  | rs74984957  |
| rs7447593  | rs74556176  | rs74638319  | rs74701752  | rs74792869  | rs7486179   | rs74921869  | rs7498555   |
| rs74475935 | rs745566843 | rs746406027 | rs74702681  | rs74794145  | rs74861892  | rs74923452  | rs7498665   |
| rs74477937 | rs745570    | rs74640750  | rs74702905  | rs74795342  | rs7486387   | rs749237684 | rs7498798   |
| rs7447927  | rs7456039   | rs7464181   | rs74705037  | rs74796499  | rs7486418   | rs7492628   | rs7498831   |
| rs74480102 | rs74562885  | rs7464263   | rs74705753  | rs74796574  | rs7486501   | rs74927619  | rs749891445 |
| rs74480769 | rs74563318  | rs746429    | rs747058684 | rs74796695  | rs74865018  | rs74927662  | rs749921369 |
| rs74482535 | rs74564651  | rs74643199  | rs74706075  | rs74796725  | rs74865311  | rs74928908  | rs7499271   |
| rs74484931 | rs74566184  | rs74643882  | rs7470777   | rs7479922   | rs7486636   | rs74929147  | rs7499362   |
| rs74485684 | rs74566838  | rs746441804 | rs747091    | rs748012    | rs74869459  | rs74929176  | rs7499413   |



|             |             |             |             |            |             |             |             |
|-------------|-------------|-------------|-------------|------------|-------------|-------------|-------------|
| rs749953    | rs7504112   | rs751171    | rs7516841   | rs7521390  | rs7525656   | rs7531322   | rs7536201   |
| rs74996610  | rs750416    | rs75117248  | rs75170853  | rs7521392  | rs7525870   | rs7531398   | rs7536433   |
| rs74997287  | rs7504262   | rs7511745   | rs75170914  | rs75214121 | rs752590    | rs753173864 | rs753645751 |
| rs7499750   | rs7504492   | rs75120545  | rs751728    | rs7521492  | rs7526035   | rs7531806   | rs7536458   |
| rs74998556  | rs750460    | rs75122859  | rs7517302   | rs7521555  | rs75260973  | rs75318400  | rs75365967  |
| rs7499892   | rs75046825  | rs751229834 | rs7517344   | rs75217853 | rs7526108   | rs75319234  | rs7536608   |
| rs7500067   | rs750472    | rs751242519 | rs75173727  | rs7521849  | rs7526112   | rs75321045  | rs75366683  |
| rs75001243  | rs75049939  | rs7512552   | rs75174967  | rs75218770 | rs75261250  | rs7532173   | rs7537039   |
| rs7500154   | rs750510622 | rs7512595   | rs75174989  | rs7521902  | rs7526171   | rs7532281   | rs7537072   |
| rs7500242   | rs7505145   | rs7512646   | rs75175706  | rs75219483 | rs75262919  | rs75322822  | rs7537213   |
| rs75002729  | rs75055810  | rs75126888  | rs7517628   | rs75219938 | rs75263396  | rs75323010  | rs7537229   |
| rs7500321   | rs75056698  | rs75128008  | rs7517629   | rs7522014  | rs7526446   | rs7532370   | rs753725    |
| rs7500349   | rs750583    | rs75128958  | rs751768773 | rs7522061  | rs75265117  | rs75324100  | rs75372982  |
| rs7500448   | rs7505855   | rs7512924   | rs75177132  | rs752208   | rs7526517   | rs7532617   | rs75375644  |
| rs7500549   | rs750598    | rs751305737 | rs7517737   | rs7522116  | rs75265191  | rs75326924  | rs7537581   |
| rs750062    | rs75059851  | rs75130744  | rs7517810   | rs7522260  | rs75265799  | rs753270    | rs753760    |
| rs7500645   | rs75061358  | rs75130836  | rs7517838   | rs7522293  | rs7526682   | rs7532748   | rs7537605   |
| rs750065349 | rs75061684  | rs7513363   | rs7517847   | rs7522356  | rs75267082  | rs7532866   | rs7537660   |
| rs750085    | rs75062112  | rs7513428   | rs75179644  | rs7522462  | rs7526762   | rs753307    | rs7537691   |
| rs750090    | rs75064168  | rs75134464  | rs7518099   | rs75224897 | rs7526795   | rs7533094   | rs753775434 |
| rs75009721  | rs75064307  | rs7513464   | rs7518129   | rs75225321 | rs75268115  | rs75331444  | rs7537765   |
| rs7501078   | rs7506451   | rs75134844  | rs7518151   | rs75225803 | rs75271464  | rs75332279  | rs753778    |
| rs75011412  | rs7506595   | rs7513580   | rs7518186   | rs75226183 | rs752726    | rs753341    | rs7537879   |
| rs75012440  | rs75066758  | rs75137058  | rs7518221   | rs7522677  | rs75272608  | rs75334297  | rs75379794  |
| rs75013985  | rs75068943  | rs7513707   | rs75185853  | rs7522777  | rs7527300   | rs7533482   | rs75380949  |
| rs750155    | rs7506909   | rs75139539  | rs751859    | rs75228657 | rs75273312  | rs75334886  | rs753827512 |
| rs75017517  | rs750691    | rs75140056  | rs7518602   | rs75228775 | rs7527758   | rs7533564   | rs7538321   |
| rs7501812   | rs750714    | rs75141555  | rs75186047  | rs75230517 | rs75277616  | rs7533590   | rs753833181 |
| rs750188    | rs7507204   | rs7514174   | rs75186747  | rs752307   | rs7527798   | rs75336464  | rs7538379   |
| rs750192    | rs75072578  | rs7514202   | rs7518687   | rs7523086  | rs752786405 | rs75337432  | rs7538393   |
| rs7501939   | rs75073573  | rs7514450   | rs75187262  | rs75230966 | rs75278839  | rs753381    | rs7538512   |
| rs75020883  | rs7507400   | rs7514453   | rs7518906   | rs752313   | rs7527939   | rs7534070   | rs75385537  |
| rs75021220  | rs75075448  | rs7514579   | rs75190942  | rs7523141  | rs75279419  | rs75340848  | rs75387636  |
| rs7502214   | rs75077113  | rs7514622   | rs7519259   | rs7523273  | rs7528013   | rs7534091   | rs7538812   |
| rs75022332  | rs75077214  | rs75146649  | rs7519279   | rs7523344  | rs75282864  | rs75341124  | rs7538876   |
| rs7502280   | rs75077568  | rs7514705   | rs7519368   | rs75234242 | rs7528296   | rs75343521  | rs75389224  |
| rs7502307   | rs75077631  | rs7514742   | rs75193859  | rs7523471  | rs7528419   | rs7534393   | rs75389281  |
| rs7502409   | rs75078292  | rs75147459  | rs7519429   | rs752355   | rs7528427   | rs7534398   | rs7538966   |
| rs7502499   | rs7508      | rs75149654  | rs75195552  | rs75236462 | rs7528604   | rs7534480   | rs7538978   |
| rs7502556   | rs75080135  | rs75150069  | rs7519574   | rs7523668  | rs75286142  | rs7534501   | rs7538986   |
| rs75025690  | rs7508148   | rs75150349  | rs7519626   | rs7523829  | rs7528684   | rs75345455  | rs7538988   |
| rs7502590   | rs75084216  | rs75152355  | rs7519758   | rs7523839  | rs75287599  | rs7534577   | rs7539005   |
| rs750295851 | rs75084335  | rs75152587  | rs751979    | rs7523875  | rs75287757  | rs7534703   | rs7539006   |
| rs7502971   | rs75085022  | rs75153093  | rs751984    | rs7523907  | rs7528894   | rs75347775  | rs753910330 |
| rs75029938  | rs7508601   | rs7515360   | rs751985    | rs7524019  | rs75290071  | rs75347843  | rs75391812  |
| rs75031626  | rs7508633   | rs751543    | rs75198716  | rs75240282 | rs7529220   | rs7534788   | rs75392157  |
| rs7503168   | rs75086474  | rs7515577   | rs7519889   | rs7524102  | rs75294181  | rs75348188  | rs75393320  |
| rs75031954  | rs75087725  | rs7515597   | rs75198898  | rs75242248 | rs7529520   | rs7534840   | rs75393409  |
| rs7503199   | rs7508819   | rs7515635   | rs75199129  | rs75242975 | rs7529522   | rs75349541  | rs75394422  |
| rs75032664  | rs750884927 | rs7515768   | rs7520050   | rs7524309  | rs7529542   | rs7535099   | rs7539517   |
| rs75033012  | rs75088562  | rs7515857   | rs7520065   | rs7524620  | rs7529589   | rs7535122   | rs7539542   |
| rs750332    | rs75090987  | rs75159625  | rs75200691  | rs75246752 | rs752976285 | rs7535162   | rs753955    |
| rs75033378  | rs7509102   | rs75159994  | rs7520103   | rs752474   | rs7529925   | rs75352129  | rs75395676  |
| rs7503353   | rs750931137 | rs75160195  | rs75203411  | rs7524755  | rs752992795 | rs7535241   | rs7539725   |
| rs75034466  | rs75096272  | rs7516079   | rs75203710  | rs75247762 | rs752993    | rs7535253   | rs75398113  |
| rs7503461   | rs75097049  | rs75161053  | rs752045    | rs7524908  | rs7530102   | rs753525368 | rs753984    |
| rs7503464   | rs751018887 | rs7516138   | rs75205693  | rs7524950  | rs7530117   | rs753541202 | rs75398587  |
| rs75035127  | rs75101983  | rs7516171   | rs752075701 | rs75250417 | rs753013    | rs75354213  | rs7539903   |
| rs7503550   | rs75104038  | rs7516214   | rs7520853   | rs75250683 | rs75303099  | rs7535475   | rs7540096   |
| rs7503580   | rs751065    | rs7516386   | rs752092    | rs7525101  | rs75303441  | rs7535528   | rs7540115   |
| rs75036654  | rs751075734 | rs75164096  | rs75210106  | rs7525164  | rs753044    | rs75355720  | rs75401573  |
| rs7503751   | rs75107793  | rs7516441   | rs7521072   | rs7525202  | rs75305034  | rs75356449  | rs754023    |
| rs7503807   | rs75108536  | rs75164522  | rs75211492  | rs7525308  | rs7530705   | rs7535818   | rs7540317   |
| rs7503951   | rs751156121 | rs75165924  | rs75211749  | rs75253922 | rs75307421  | rs7535826   | rs75404152  |
| rs75040706  | rs751167249 | rs751663    | rs7521231   | rs7525548  | rs75308819  | rs75359967  | rs75405010  |
| rs7504089   | rs751168    | rs7516640   | rs75213074  | rs7525560  | rs7531118   | rs7536102   | rs75405126  |
| rs7504106   | rs7511698   | rs75166914  | rs752131371 | rs7525649  | rs7531271   | rs753612    | rs754058    |

|             |             |             |             |             |             |             |             |
|-------------|-------------|-------------|-------------|-------------|-------------|-------------|-------------|
| rs754058883 | rs75457814  | rs754947292 | rs75530256  | rs7557525   | rs75619216  | rs75666428  | rs7571486   |
| rs75406471  | rs75457925  | rs754959778 | rs7553158   | rs7557527   | rs75619936  | rs75667161  | rs7571554   |
| rs75407602  | rs7545860   | rs75497300  | rs7553258   | rs7557715   | rs7562      | rs7566761   | rs757158    |
| rs7540857   | rs75458655  | rs75497452  | rs7553271   | rs7557737   | rs75621460  | rs7566780   | rs7571606   |
| rs7541039   | rs754593    | rs7549876   | rs7553348   | rs7557781   | rs7562173   | rs756699    | rs7571789   |
| rs75410747  | rs75459873  | rs7549881   | rs75533977  | rs7557793   | rs75623217  | rs7567133   | rs7571816   |
| rs75411106  | rs75460256  | rs75499226  | rs755342427 | rs7557989   | rs7562480   | rs756717    | rs7571822   |
| rs75412999  | rs75460349  | rs75499503  | rs7553454   | rs75581564  | rs75625374  | rs7567229   | rs7571826   |
| rs754133    | rs75460821  | rs755       | rs75535814  | rs75582158  | rs7562697   | rs7567283   | rs75718887  |
| rs75414584  | rs7546094   | rs755000    | rs75536691  | rs7558283   | rs7562708   | rs7567288   | rs7571898   |
| rs7541549   | rs7546227   | rs7550068   | rs7553711   | rs755837    | rs7562734   | rs7567451   | rs7571971   |
| rs7541775   | rs7546242   | rs75500877  | rs755374    | rs7558413   | rs7562756   | rs75674569  | rs7572      |
| rs754179    | rs7546252   | rs7550088   | rs75537912  | rs7558440   | rs75627662  | rs756747    | rs757200782 |
| rs75418188  | rs7546297   | rs7550173   | rs755383    | rs75584603  | rs7562790   | rs7567544   | rs7572027   |
| rs75418630  | rs754635    | rs75501914  | rs75539574  | rs7558502   | rs75630086  | rs7567570   | rs757210    |
| rs7542009   | rs7546498   | rs7550207   | rs75540417  | rs755852    | rs7563083   | rs7567851   | rs75721280  |
| rs754205    | rs7546500   | rs755023315 | rs75541746  | rs7558670   | rs7563124   | rs7567892   | rs7572209   |
| rs7542053   | rs7546616   | rs7550273   | rs7554251   | rs75587692  | rs75631642  | rs75679663  | rs7572263   |
| rs7542091   | rs7546665   | rs75503803  | rs75542613  | rs75588192  | rs7563201   | rs7568039   | rs7572278   |
| rs7542172   | rs7546668   | rs75504410  | rs75543135  | rs75588466  | rs7563270   | rs7568069   | rs75723348  |
| rs7542186   | rs754689812 | rs75505823  | rs7554335   | rs755885030 | rs7563362   | rs7568149   | rs7572523   |
| rs7542229   | rs7547112   | rs75506452  | rs7554367   | rs7558911   | rs756350040 | rs7568172   | rs757253787 |
| rs7542235   | rs7547190   | rs75507001  | rs75543966  | rs7558924   | rs7563627   | rs7568228   | rs7572603   |
| rs7542260   | rs754730014 | rs75507031  | rs7554456   | rs7559046   | rs75636497  | rs7568275   | rs7572661   |
| rs75423501  | rs75473010  | rs7550711   | rs7554469   | rs75590598  | rs7563664   | rs75682840  | rs75727053  |
| rs7542354   | rs75473620  | rs75507123  | rs7554511   | rs75591122  | rs7563723   | rs7568458   | rs75727214  |
| rs7542631   | rs7547416   | rs7550790   | rs75545207  | rs7559271   | rs75637630  | rs7568498   | rs7572857   |
| rs7542665   | rs75474297  | rs755081222 | rs7554551   | rs755927998 | rs75638145  | rs756853    | rs75728872  |
| rs7542907   | rs75474551  | rs755083964 | rs755467826 | rs75593079  | rs75638798  | rs75686861  | rs7572922   |
| rs7542974   | rs7547493   | rs7550918   | rs7554873   | rs7559329   | rs75639464  | rs7568863   | rs757293    |
| rs7543039   | rs75475571  | rs75511207  | rs755500    | rs75594032  | rs75639632  | rs756893948 | rs7572970   |
| rs7543130   | rs75475627  | rs75511781  | rs7555006   | rs755951    | rs75640364  | rs7569084   | rs7573001   |
| rs75432112  | rs7547569   | rs75511812  | rs7555082   | rs75596189  | rs75641219  | rs75691080  | rs757309    |
| rs75432325  | rs7547570   | rs7551442   | rs75551077  | rs75596315  | rs75641275  | rs756912    | rs757318    |
| rs75432890  | rs75477016  | rs7551474   | rs7555285   | rs7559658   | rs7564129   | rs7569203   | rs7573187   |
| rs75433790  | rs75477785  | rs7551507   | rs7555302   | rs7559976   | rs7564130   | rs75692336  | rs7573217   |
| rs75433889  | rs75478074  | rs75515090  | rs75553180  | rs7559982   | rs7564273   | rs7569257   | rs75732647  |
| rs7543389   | rs75479205  | rs75515594  | rs755546258 | rs75599919  | rs75643536  | rs75693095  | rs7573331   |
| rs75434097  | rs7547965   | rs755167    | rs75554719  | rs7560015   | rs75645041  | rs7569317   | rs7573465   |
| rs75434274  | rs7547997   | rs75516957  | rs7555523   | rs7560163   | rs7564553   | rs7569375   | rs7573618   |
| rs7543480   | rs75479997  | rs7551731   | rs7555556   | rs75601653  | rs7564652   | rs7569376   | rs7573672   |
| rs75434917  | rs7548151   | rs7551732   | rs75556712  | rs75601727  | rs7564708   | rs7569424   | rs7573674   |
| rs7543687   | rs754821    | rs75518008  | rs75557055  | rs7560180   | rs756481    | rs7569453   | rs75736976  |
| rs7543734   | rs75482283  | rs75518158  | rs75557865  | rs75601975  | rs7564856   | rs7569506   | rs75737648  |
| rs75438046  | rs7548269   | rs7551957   | rs755587908 | rs75604893  | rs7564935   | rs75695558  | rs7573782   |
| rs7543855   | rs75483173  | rs7552      | rs7556072   | rs756055    | rs75649625  | rs7569646   | rs7574070   |
| rs754388    | rs75483641  | rs75520281  | rs7556221   | rs7560588   | rs75649790  | rs7569717   | rs7574116   |
| rs75439322  | rs75485436  | rs75520741  | rs755631    | rs75605943  | rs75650221  | rs7569755   | rs75741381  |
| rs7544256   | rs7548588   | rs7552167   | rs755643    | rs75607637  | rs756519    | rs75699605  | rs757416    |
| rs75444260  | rs7548606   | rs7552186   | rs7556614   | rs7560871   | rs7565237   | rs7570090   | rs75742406  |
| rs75444660  | rs754868    | rs7552188   | rs75567174  | rs7560880   | rs7565301   | rs75701347  | rs7574314   |
| rs75444904  | rs7548688   | rs755222686 | rs75567729  | rs75609851  | rs7565313   | rs75701938  | rs75743485  |
| rs75446219  | rs75488612  | rs75522380  | rs7556782   | rs756102064 | rs75653149  | rs757040    | rs7574429   |
| rs754465    | rs7548936   | rs75522736  | rs7556815   | rs7561149   | rs75654367  | rs7570446   | rs7574456   |
| rs754466    | rs75490288  | rs755229494 | rs7556896   | rs7561278   | rs7565437   | rs7570469   | rs75745192  |
| rs75446656  | rs7549029   | rs75523587  | rs7556897   | rs7561317   | rs75655830  | rs75706763  | rs757461    |
| rs75448045  | rs754907260 | rs75523874  | rs755697733 | rs7561404   | rs75655981  | rs7570707   | rs757462    |
| rs75448370  | rs75491173  | rs7552404   | rs75570604  | rs75614054  | rs75660521  | rs757081    | rs75746498  |
| rs7544869   | rs75491569  | rs755249    | rs7557067   | rs756145    | rs7566062   | rs7570841   | rs75746601  |
| rs7545047   | rs7549164   | rs7552544   | rs7557092   | rs7561460   | rs75662196  | rs7570920   | rs757485    |
| rs7545139   | rs7549173   | rs75526024  | rs75570992  | rs7561528   | rs756625282 | rs7570971   | rs7574865   |
| rs75452188  | rs75492293  | rs7552783   | rs755710662 | rs7561544   | rs75663391  | rs757110    | rs75750649  |
| rs7545219   | rs7549293   | rs7552830   | rs75572195  | rs75615471  | rs75663481  | rs7571154   | rs7575113   |
| rs75452709  | rs7549303   | rs755291044 | rs7557395   | rs75616205  | rs756635043 | rs757123    | rs7575118   |
| rs754532    | rs7549358   | rs7552964   | rs7557401   | rs7561675   | rs7566501   | rs7571231   | rs75751670  |
| rs754537    | rs75493593  | rs75530000  | rs755742923 | rs7561705   | rs756653    | rs75713100  | rs7575217   |
| rs75456019  | rs75493807  | rs7553007   | rs75575209  | rs7561798   | rs756655457 | rs757138    | rs7575465   |

|             |             |             |             |             |             |             |             |
|-------------|-------------|-------------|-------------|-------------|-------------|-------------|-------------|
| rs75755010  | rs75792643  | rs7582977   | rs7586834   | rs75917780  | rs75960650  | rs7600244   | rs76041173  |
| rs7575512   | rs7579277   | rs7583027   | rs7586855   | rs759188048 | rs75961402  | rs7600385   | rs76041397  |
| rs7575523   | rs75792932  | rs7583067   | rs7586858   | rs75919030  | rs7596219   | rs76004499  | rs76042375  |
| rs75755325  | rs75793288  | rs7583068   | rs7586879   | rs75919952  | rs759623919 | rs7600475   | rs76044403  |
| rs757556114 | rs7579427   | rs75831154  | rs7586881   | rs7591996   | rs7596240   | rs76005009  | rs76044423  |
| rs7575635   | rs7579443   | rs7583126   | rs75869162  | rs75920871  | rs75963851  | rs7600502   | rs7604529   |
| rs7575637   | rs7579468   | rs7583216   | rs7586928   | rs7592120   | rs75964046  | rs760060673 | rs76045944  |
| rs75756843  | rs7579497   | rs7583384   | rs7586970   | rs75921602  | rs759648    | rs76006132  | rs7604674   |
| rs75756987  | rs7579662   | rs75834729  | rs7587010   | rs759219    | rs7596521   | rs7600624   | rs7604735   |
| rs75757892  | rs7579670   | rs75835816  | rs7587026   | rs759250    | rs759663    | rs760067    | rs7604788   |
| rs7575840   | rs757980    | rs75836061  | rs758747    | rs75925066  | rs759664    | rs760077    | rs76048411  |
| rs7575873   | rs7579899   | rs75836205  | rs75874749  | rs75925257  | rs7596684   | rs76008177  | rs760492889 |
| rs7575878   | rs7579944   | rs758374    | rs7587476   | rs7592541   | rs7596689   | rs7600835   | rs760500    |
| rs75759008  | rs7579959   | rs75837874  | rs758752368 | rs7592578   | rs75967349  | rs76009562  | rs7605066   |
| rs757593    | rs7580108   | rs7583877   | rs758753442 | rs75926215  | rs75967634  | rs7601000   | rs76051363  |
| rs7575938   | rs75801442  | rs7583880   | rs7587577   | rs7593009   | rs75968099  | rs7601101   | rs7605146   |
| rs75759936  | rs75801644  | rs7584078   | rs75877458  | rs75930676  | rs7596814   | rs7601153   | rs760517    |
| rs75759977  | rs75802552  | rs758410524 | rs7587851   | rs7593080   | rs7596847   | rs760117    | rs76052316  |
| rs7576030   | rs75804782  | rs7584262   | rs758801    | rs7593100   | rs7596872   | rs760118    | rs76052955  |
| rs757608    | rs7580658   | rs75842709  | rs7588010   | rs75932578  | rs7597007   | rs7601259   | rs76053540  |
| rs7576126   | rs7580766   | rs75843224  | rs7588201   | rs75932628  | rs75970938  | rs7601312   | rs7605378   |
| rs757621541 | rs7580771   | rs7584330   | rs7588285   | rs75933622  | rs7597126   | rs7601412   | rs7605411   |
| rs757625199 | rs758080886 | rs7584334   | rs75883022  | rs7593422   | rs759714828 | rs76014404  | rs760545501 |
| rs757634967 | rs7580831   | rs758436299 | rs7588384   | rs759359281 | rs75972122  | rs7601475   | rs7605813   |
| rs75763833  | rs7581030   | rs7584373   | rs7588437   | rs7593730   | rs7597336   | rs7601482   | rs76058259  |
| rs7576384   | rs75810319  | rs758445    | rs75885714  | rs75937733  | rs75973558  | rs7601485   | rs7605872   |
| rs75763843  | rs7581162   | rs75844534  | rs75885813  | rs759382    | rs7597412   | rs7601633   | rs7605909   |
| rs75764599  | rs758117    | rs7584592   | rs7588654   | rs7593846   | rs75975831  | rs7601637   | rs76060013  |
| rs75764673  | rs7581217   | rs758468472 | rs75886993  | rs75938525  | rs7597593   | rs76016857  | rs7606059   |
| rs7576541   | rs7581233   | rs7584691   | rs7588746   | rs7593947   | rs7597623   | rs76017475  | rs7606102   |
| rs75765453  | rs758129    | rs7584710   | rs7588761   | rs759404    | rs7597665   | rs7601754   | rs76061303  |
| rs7576585   | rs7581427   | rs7584777   | rs7589023   | rs759410236 | rs75977651  | rs7601767   | rs7606173   |
| rs75766     | rs75814517  | rs75848431  | rs75891547  | rs75941710  | rs7597768   | rs7601800   | rs7606205   |
| rs75766425  | rs7581524   | rs75848890  | rs7589318   | rs7594221   | rs7597861   | rs7601866   | rs7606277   |
| rs7576689   | rs75816352  | rs7584946   | rs7589428   | rs7594223   | rs7597877   | rs7601895   | rs76064513  |
| rs75767043  | rs7581662   | rs75852434  | rs7589518   | rs7594321   | rs75978807  | rs76019166  | rs7606466   |
| rs757678    | rs7581704   | rs7585344   | rs758976    | rs7594363   | rs7597959   | rs7602025   | rs760648    |
| rs75768999  | rs75817747  | rs75853460  | rs7589790   | rs75943957  | rs759819    | rs76020419  | rs7606480   |
| rs75770066  | rs75818130  | rs75853687  | rs75898076  | rs7594447   | rs7598246   | rs76022305  | rs76065536  |
| rs75770358  | rs75818295  | rs7585427   | rs75898208  | rs7594485   | rs759830397 | rs7602243   | rs7606562   |
| rs757720522 | rs7581834   | rs75854315  | rs75899245  | rs7594497   | rs75983064  | rs7602370   | rs76065946  |
| rs75772222  | rs7581849   | rs7585579   | rs75900305  | rs7594645   | rs75983310  | rs76024129  | rs76066357  |
| rs75772244  | rs7581955   | rs7585658   | rs75900472  | rs75946928  | rs7598396   | rs7602425   | rs76066823  |
| rs7577262   | rs7581969   | rs7585722   | rs759016271 | rs75947264  | rs7598402   | rs76024494  | rs7606754   |
| rs7577293   | rs7581972   | rs7585730   | rs75901817  | rs7594852   | rs759843    | rs7602499   | rs76067940  |
| rs75774080  | rs7582059   | rs7585767   | rs7590201   | rs759488    | rs7598465   | rs76025697  | rs7607014   |
| rs757744062 | rs7582141   | rs7585866   | rs75902664  | rs75949790  | rs7598674   | rs7602576   | rs76070960  |
| rs7577599   | rs75821416  | rs75859381  | rs7590268   | rs7595      | rs7598684   | rs7602651   | rs760711380 |
| rs7577690   | rs7582180   | rs7585962   | rs7590302   | rs7595037   | rs759869    | rs76027714  | rs760719    |
| rs7577696   | rs75822236  | rs7585974   | rs7590368   | rs75950518  | rs7598832   | rs7602799   | rs76072474  |
| rs75777376  | rs75823044  | rs758598    | rs7590388   | rs7595075   | rs75988962  | rs7602992   | rs76073588  |
| rs75777619  | rs7582359   | rs758599    | rs7590429   | rs7595140   | rs75990271  | rs7603103   | rs7607369   |
| rs75779304  | rs7582403   | rs75859969  | rs759049867 | rs75953559  | rs7599125   | rs7603132   | rs76074383  |
| rs7578029   | rs75824359  | rs7586062   | rs75905358  | rs7595419   | rs7599224   | rs760327    | rs76074386  |
| rs7578035   | rs75824829  | rs7586066   | rs75905933  | rs759544745 | rs759928    | rs7603427   | rs7607490   |
| rs7578166   | rs7582485   | rs7586085   | rs7590658   | rs75954926  | rs7599312   | rs7603438   | rs760762    |
| rs75782365  | rs7582516   | rs75861150  | rs759068    | rs7595529   | rs75994395  | rs7603658   | rs76076331  |
| rs7578326   | rs758252496 | rs75861713  | rs7590720   | rs7595574   | rs7599488   | rs7603664   | rs76076446  |
| rs75783371  | rs7582535   | rs7586272   | rs75910605  | rs7595717   | rs75995782  | rs76036841  | rs76077165  |
| rs7578393   | rs758263    | rs75863239  | rs7591091   | rs75957461  | rs7599598   | rs760369    | rs7607797   |
| rs75783973  | rs7582694   | rs758643372 | rs7591175   | rs75957619  | rs75996683  | rs76036957  | rs760788    |
| rs75785507  | rs7582720   | rs758648676 | rs7591387   | rs7595769   | rs7599697   | rs76038906  | rs76079263  |
| rs7578575   | rs75827282  | rs75865061  | rs7591431   | rs759582068 | rs7599706   | rs760390566 | rs760794    |
| rs7578597   | rs7582731   | rs7586597   | rs7591506   | rs7595950   | rs7599762   | rs76040172  | rs7607980   |
| rs75786554  | rs7582837   | rs7586604   | rs75915166  | rs7596      | rs7599860   | rs760402913 | rs76080057  |
| rs757869    | rs75828748  | rs7586641   | rs75915571  | rs7596038   | rs76000021  | rs7604081   | rs76080105  |
| rs7579187   | rs75828804  | rs7586673   | rs759169    | rs759604347 | rs76000727  | rs7604115   | rs760805    |

|             |             |             |             |             |             |             |             |
|-------------|-------------|-------------|-------------|-------------|-------------|-------------|-------------|
| rs76080730  | rs7612159   | rs76162423  | rs7619708   | rs762516    | rs76306191  | rs7634107   | rs7639048   |
| rs76081789  | rs76121963  | rs76162994  | rs7619833   | rs762534    | rs7630625   | rs763415480 | rs7639060   |
| rs76082815  | rs76122535  | rs761638878 | rs76199858  | rs7625399   | rs76307059  | rs76341705  | rs7639267   |
| rs76082995  | rs7612295   | rs76164182  | rs7620260   | rs7625428   | rs7630745   | rs76342258  | rs7639292   |
| rs7608397   | rs7612445   | rs76164234  | rs7620503   | rs7625643   | rs763076    | rs7634389   | rs7639683   |
| rs76083992  | rs7612463   | rs76164690  | rs7620608   | rs7625768   | rs7630814   | rs7634474   | rs76397965  |
| rs7608483   | rs7612511   | rs761659435 | rs7620634   | rs76257861  | rs7630852   | rs7634476   | rs7639816   |
| rs76087154  | rs761269475 | rs76166162  | rs76206723  | rs76258418  | rs7630893   | rs76346476  | rs76398229  |
| rs76088152  | rs76127683  | rs7616632   | rs7620749   | rs7625896   | rs763092306 | rs7634699   | rs76398786  |
| rs76088467  | rs761277    | rs7616662   | rs76207901  | rs7625980   | rs76309426  | rs7634887   | rs7639927   |
| rs7608910   | rs7612773   | rs76167224  | rs762080    | rs7626079   | rs7631008   | rs76350761  | rs7640      |
| rs7609      | rs76128631  | rs76167860  | rs7620901   | rs7626218   | rs763102039 | rs76353203  | rs7640107   |
| rs760900    | rs7612956   | rs76167968  | rs76210166  | rs76262184  | rs763102966 | rs76353274  | rs7640115   |
| rs7609050   | rs7612999   | rs7616903   | rs7621025   | rs7626226   | rs76311067  | rs7635449   | rs7640269   |
| rs7609078   | rs7613051   | rs761702    | rs7621161   | rs762624    | rs76311467  | rs76355118  | rs764029425 |
| rs7609203   | rs76130710  | rs7617107   | rs76213020  | rs76262922  | rs7631156   | rs763553    | rs7640342   |
| rs7609283   | rs76130798  | rs76171326  | rs76213248  | rs7626335   | rs763121    | rs7635633   | rs7640424   |
| rs760938    | rs76131026  | rs761718    | rs7621331   | rs76263492  | rs763127    | rs76356735  | rs764042828 |
| rs76094073  | rs7613213   | rs7617181   | rs7621362   | rs76264073  | rs7631379   | rs76357250  | rs7640441   |
| rs7609422   | rs76132272  | rs7617204   | rs76215063  | rs7626444   | rs7631394   | rs76357893  | rs7640539   |
| rs7609428   | rs76132480  | rs76172517  | rs7621542   | rs7626560   | rs7631518   | rs76358155  | rs7640543   |
| rs76095247  | rs7613360   | rs7617390   | rs7621569   | rs7626596   | rs7631606   | rs7635832   | rs76406469  |
| rs7609579   | rs7613412   | rs7617394   | rs762158    | rs76267164  | rs76316943  | rs7635838   | rs76406609  |
| rs76097649  | rs7613444   | rs7617480   | rs7621604   | rs7626717   | rs7631721   | rs76358556  | rs7640665   |
| rs7609897   | rs76134593  | rs7617588   | rs76217164  | rs76267866  | rs7631735   | rs7636026   | rs7640747   |
| rs76099163  | rs761357    | rs76177150  | rs76217384  | rs762679    | rs7631981   | rs7636057   | rs76407752  |
| rs7609954   | rs7613595   | rs761772    | rs7621843   | rs76268375  | rs7632108   | rs76361738  | rs7640978   |
| rs760997    | rs761366    | rs7617754   | rs76219171  | rs762705    | rs763232871 | rs7636293   | rs76410205  |
| rs7610095   | rs7613681   | rs7617773   | rs7621959   | rs76271629  | rs7632342   | rs7636341   | rs76411146  |
| rs7610102   | rs7613875   | rs76178013  | rs7622074   | rs76272256  | rs763236    | rs76363701  | rs76411246  |
| rs76102184  | rs761390078 | rs76179192  | rs7622114   | rs7627326   | rs7632381   | rs76364830  | rs7641175   |
| rs7610266   | rs761391    | rs7617950   | rs76221407  | rs76273615  | rs76323852  | rs7636493   | rs7641212   |
| rs7610301   | rs761393131 | rs76179738  | rs76223987  | rs7627468   | rs76324150  | rs7636495   | rs764129    |
| rs7610312   | rs7614016   | rs76179989  | rs76224110  | rs7627511   | rs7632427   | rs763665    | rs76413021  |
| rs7610366   | rs76140469  | rs761806447 | rs76224134  | rs7627798   | rs76324918  | rs7636839   | rs7641322   |
| rs76104167  | rs76141549  | rs7618071   | rs762246412 | rs7627971   | rs7632502   | rs76368648  | rs7641325   |
| rs7610486   | rs761422    | rs76181418  | rs76225863  | rs76279925  | rs7632505   | rs7636909   | rs7641347   |
| rs7610557   | rs761423    | rs76181804  | rs76226214  | rs762810    | rs76325372  | rs7636944   | rs764166931 |
| rs761059654 | rs761426    | rs761826    | rs76226393  | rs7628207   | rs76326501  | rs7636965   | rs76416966  |
| rs7610618   | rs76143353  | rs76182733  | rs7622665   | rs76282124  | rs763268500 | rs76369685  | rs7641761   |
| rs76106973  | rs76144645  | rs7618327   | rs7622812   | rs7628338   | rs76327888  | rs763696876 | rs76417956  |
| rs761075897 | rs76145129  | rs76183280  | rs7622814   | rs762834393 | rs7632937   | rs7637230   | rs76418789  |
| rs7610856   | rs7614560   | rs7618363   | rs7622817   | rs76284158  | rs7632986   | rs76374005  | rs764192132 |
| rs76109155  | rs7614709   | rs7618405   | rs7623444   | rs76284431  | rs76330411  | rs7637427   | rs7642001   |
| rs76109311  | rs7614738   | rs761841    | rs762344518 | rs76286687  | rs7633119   | rs7637431   | rs764206    |
| rs76109497  | rs76148407  | rs76184221  | rs76234559  | rs7628747   | rs76331566  | rs76375795  | rs76420714  |
| rs7611020   | rs761489    | rs7618501   | rs7623513   | rs76287541  | rs763318    | rs76376137  | rs764213    |
| rs7611165   | rs7614922   | rs7618519   | rs76235882  | rs76288073  | rs7633294   | rs7637773   | rs7642134   |
| rs76112240  | rs76152268  | rs76186171  | rs7623659   | rs7628864   | rs763333    | rs763780    | rs7642243   |
| rs76112798  | rs7615316   | rs7618629   | rs7623687   | rs76289267  | rs763342    | rs7637801   | rs76422502  |
| rs761132151 | rs7615408   | rs76186504  | rs762387    | rs76289367  | rs7633520   | rs7637997   | rs76423146  |
| rs7611444   | rs76154345  | rs76187039  | rs762395    | rs7629      | rs76335321  | rs76380179  | rs7642359   |
| rs76114856  | rs76154380  | rs76187115  | rs7624041   | rs7629285   | rs76335902  | rs7638018   | rs7642482   |
| rs76115890  | rs76154567  | rs76187874  | rs7624084   | rs7629630   | rs763361    | rs763812285 | rs7642536   |
| rs76116020  | rs76154806  | rs76188060  | rs7624086   | rs7629643   | rs763362    | rs7638143   | rs76425715  |
| rs76116224  | rs7615568   | rs7618871   | rs76241163  | rs7629791   | rs763362670 | rs76381550  | rs764257935 |
| rs761164    | rs7615602   | rs76189032  | rs76241605  | rs76299412  | rs7633661   | rs76382185  | rs76426991  |
| rs7611674   | rs76157805  | rs7618915   | rs762421    | rs762995    | rs7633673   | rs7638275   | rs76427287  |
| rs7611694   | rs76158750  | rs761898    | rs7624230   | rs7630012   | rs7633675   | rs76383255  | rs76428106  |
| rs761180516 | rs7615916   | rs7619082   | rs7624274   | rs76300959  | rs76337287  | rs76383471  | rs764284    |
| rs7611820   | rs7615960   | rs761910563 | rs76242821  | rs7630115   | rs76337351  | rs7638389   | rs76428668  |
| rs76119016  | rs7616006   | rs7619139   | rs76243438  | rs7630133   | rs7633770   | rs7638452   | rs7642903   |
| rs76119478  | rs7616009   | rs7619280   | rs76244256  | rs76301628  | rs7633959   | rs7638516   | rs7642977   |
| rs7611991   | rs76160849  | rs76193741  | rs76244727  | rs7630325   | rs7633965   | rs7638524   | rs764311894 |
| rs761202278 | rs76160968  | rs7619401   | rs762450647 | rs7630382   | rs7633988   | rs763855108 | rs76432012  |
| rs76120745  | rs7616201   | rs7619476   | rs76246107  | rs7630417   | rs7633995   | rs7638750   | rs7643341   |
| rs7612124   | rs7616215   | rs761954625 | rs7625080   | rs763053    | rs7634084   | rs7638853   | rs7643392   |

|             |             |             |             |             |             |             |             |
|-------------|-------------|-------------|-------------|-------------|-------------|-------------|-------------|
| rs7643617   | rs7648466   | rs7652177   | rs76564347  | rs76614553  | rs7667281   | rs76729345  | rs76781995  |
| rs76436554  | rs7648547   | rs76521806  | rs76565323  | rs766146    | rs7667446   | rs7672943   | rs7678287   |
| rs764370834 | rs7648568   | rs7652216   | rs7656673   | rs76616066  | rs76675804  | rs76729432  | rs7678427   |
| rs76439304  | rs7648585   | rs76522264  | rs76567515  | rs76617915  | rs766764264 | rs76729733  | rs7678436   |
| rs764396    | rs7648605   | rs7652234   | rs76567987  | rs766206762 | rs7667722   | rs767299843 | rs76785029  |
| rs76439972  | rs76487166  | rs7652260   | rs76568292  | rs76622665  | rs76677753  | rs7673195   | rs76785379  |
| rs764401    | rs76488803  | rs7652294   | rs7657022   | rs7662551   | rs76681500  | rs76732304  | rs767855    |
| rs76442143  | rs7649045   | rs7652296   | rs765707465 | rs7662633   | rs7668190   | rs7673321   | rs7678555   |
| rs76442815  | rs7649058   | rs7652333   | rs76571594  | rs766267109 | rs7668556   | rs76735299  | rs76786413  |
| rs7644362   | rs7649075   | rs76525968  | rs7657200   | rs76626729  | rs7668586   | rs76735429  | rs76787525  |
| rs76443714  | rs76491020  | rs7652649   | rs7657225   | rs766272875 | rs7668651   | rs76736394  | rs7678928   |
| rs7644383   | rs7649164   | rs76527535  | rs7657257   | rs76627715  | rs7668673   | rs76738175  | rs76789970  |
| rs76444204  | rs76493495  | rs7652808   | rs76573344  | rs766295    | rs7668995   | rs7673823   | rs7679      |
| rs76445378  | rs76493570  | rs765285    | rs765751    | rs766320    | rs76692773  | rs76738717  | rs7679068   |
| rs7644552   | rs7649379   | rs7652995   | rs765754428 | rs7663205   | rs76693355  | rs7673984   | rs7679094   |
| rs76446292  | rs76493861  | rs765302    | rs7657553   | rs76632111  | rs7669672   | rs76741582  | rs7679162   |
| rs7644667   | rs76496105  | rs76530346  | rs76577427  | rs766326470 | rs76696867  | rs7674212   | rs7679238   |
| rs7644678   | rs7649643   | rs7653193   | rs7657746   | rs766331935 | rs766972731 | rs7674220   | rs76792961  |
| rs7644787   | rs764982    | rs7653249   | rs7657817   | rs7663650   | rs766982432 | rs76742266  | rs76793172  |
| rs7645142   | rs76498344  | rs76533333  | rs7657917   | rs766368749 | rs7669833   | rs7674369   | rs767932573 |
| rs7645203   | rs76498583  | rs765333492 | rs765807623 | rs7663740   | rs76699125  | rs7674402   | rs767943    |
| rs76452347  | rs7649970   | rs7653344   | rs7658082   | rs7663772   | rs76699517  | rs76744071  | rs7679475   |
| rs7645307   | rs76499759  | rs765338709 | rs765809072 | rs76638898  | rs76700673  | rs7674469   | rs76794875  |
| rs7645517   | rs7649989   | rs7653461   | rs7658243   | rs76639840  | rs7670068   | rs7674861   | rs76796131  |
| rs76455591  | rs76500262  | rs76535133  | rs765847064 | rs7664      | rs7670121   | rs7674870   | rs7679673   |
| rs7645585   | rs7650082   | rs765366    | rs7658486   | rs76640332  | rs76701955  | rs767487038 | rs7679724   |
| rs76455983  | rs7650127   | rs765377    | rs76585135  | rs766404766 | rs76702386  | rs76750172  | rs7679843   |
| rs7645613   | rs76502274  | rs7653834   | rs7658601   | rs766406    | rs76702514  | rs76751100  | rs76798800  |
| rs76456334  | rs76502292  | rs765386    | rs7658614   | rs76641465  | rs76702537  | rs76752096  | rs7679882   |
| rs76457207  | rs7650253   | rs765387398 | rs76586805  | rs76641566  | rs7670374   | rs76752100  | rs7680126   |
| rs7645787   | rs7650294   | rs76539602  | rs765875    | rs766419    | rs76704029  | rs7675258   | rs76801888  |
| rs7645872   | rs76504223  | rs76540488  | rs765885335 | rs766420    | rs76704408  | rs76752804  | rs76801943  |
| rs76459970  | rs7650482   | rs7654093   | rs7658917   | rs76642326  | rs767047    | rs7675394   | rs768023    |
| rs76460663  | rs765051254 | rs76541013  | rs76589360  | rs766432    | rs7670506   | rs76754787  | rs7680258   |
| rs7646283   | rs76505278  | rs76541615  | rs7658970   | rs7664347   | rs76705156  | rs76756213  | rs7680591   |
| rs764629    | rs7650602   | rs7654263   | rs7659024   | rs76643909  | rs7670758   | rs7675668   | rs7680631   |
| rs7646366   | rs765064269 | rs76543969  | rs76591930  | rs76645364  | rs76708468  | rs76757809  | rs7680661   |
| rs76464604  | rs7650683   | rs76545266  | rs7659227   | rs76648483  | rs76709099  | rs76758258  | rs7680787   |
| rs7646501   | rs76506961  | rs7654571   | rs7659379   | rs76648881  | rs76710549  | rs7675915   | rs7680806   |
| rs7646596   | rs7650845   | rs7654647   | rs76594121  | rs7664918   | rs7671167   | rs7675964   | rs76808502  |
| rs76466694  | rs76508452  | rs7654754   | rs7659468   | rs766498304 | rs76712439  | rs76761409  | rs768090    |
| rs7646695   | rs76508707  | rs7654779   | rs76595456  | rs7665090   | rs7671261   | rs76761706  | rs7680948   |
| rs7646786   | rs7650872   | rs76549217  | rs7659556   | rs7665103   | rs7671266   | rs76763715  | rs7681002   |
| rs764688    | rs765088453 | rs76549352  | rs76597567  | rs7665127   | rs7671295   | rs767657    | rs7681056   |
| rs76470478  | rs7650934   | rs7655064   | rs765982    | rs7665147   | rs76713361  | rs76766811  | rs7681161   |
| rs7647190   | rs765093878 | rs76550717  | rs7659874   | rs7665170   | rs7671578   | rs767669906 | rs768116521 |
| rs7647214   | rs7651090   | rs76551843  | rs7660000   | rs7665209   | rs7671665   | rs76767219  | rs7681288   |
| rs764726148 | rs7651114   | rs7655235   | rs766007111 | rs766522    | rs7671752   | rs767673767 | rs7681303   |
| rs7647305   | rs7651190   | rs76552497  | rs76602912  | rs7665304   | rs76718054  | rs7676765   | rs7681384   |
| rs7647313   | rs76512216  | rs76553065  | rs7660385   | rs766550465 | rs7671900   | rs76767803  | rs7681423   |
| rs7647448   | rs76513344  | rs7655441   | rs76604417  | rs76659130  | rs76719045  | rs76768932  | rs7681440   |
| rs764753    | rs76513770  | rs7655455   | rs766047297 | rs76659285  | rs76719272  | rs76769120  | rs768159759 |
| rs7647718   | rs7651407   | rs765547    | rs7660520   | rs76659454  | rs7671947   | rs7676961   | rs7681615   |
| rs764772129 | rs7651446   | rs7655625   | rs7660590   | rs766614    | rs7672      | rs7677035   | rs7681694   |
| rs7647854   | rs7651511   | rs7655660   | rs7660702   | rs7666150   | rs76720453  | rs7677078   | rs7681907   |
| rs764786839 | rs76515679  | rs76557027  | rs76608582  | rs766616225 | rs76721774  | rs76771178  | rs76819459  |
| rs7647874   | rs76515785  | rs765574776 | rs7660883   | rs7666195   | rs7672202   | rs76772442  | rs76819935  |
| rs7647909   | rs76515799  | rs7655751   | rs76610457  | rs766622    | rs76724145  | rs76774368  | rs7682241   |
| rs7647957   | rs76516194  | rs7655915   | rs766107802 | rs7666297   | rs7672519   | rs76774446  | rs7682317   |
| rs7647973   | rs7651736   | rs7656001   | rs7661090   | rs7666298   | rs7672535   | rs7677598   | rs76824303  |
| rs76479869  | rs76517946  | rs765609192 | rs76610913  | rs76665138  | rs76726049  | rs7677674   | rs7682481   |
| rs76480019  | rs76518095  | rs76561503  | rs76611452  | rs7666515   | rs7672622   | rs7677709   | rs7682598   |
| rs76480089  | rs76518703  | rs76562038  | rs766120    | rs7666824   | rs7672676   | rs7677751   | rs7682697   |
| rs76482840  | rs7651931   | rs7656246   | rs7661253   | rs76668869  | rs76726877  | rs7677938   | rs7682717   |
| rs7648308   | rs7651996   | rs76563408  | rs7661312   | rs76669111  | rs7672749   | rs7678054   | rs7682824   |
| rs7648352   | rs76520492  | rs7656342   | rs76613195  | rs7667050   | rs76728519  | rs767810019 | rs76828681  |
| rs76484449  | rs76520838  | rs7656416   | rs7661349   | rs76672197  | rs76729148  | rs7678138   | rs7682992   |

|             |             |             |             |             |             |             |             |
|-------------|-------------|-------------|-------------|-------------|-------------|-------------|-------------|
| rs7683000   | rs7687992   | rs7692387   | rs769688    | rs770162662 | rs7705924   | rs7712274   | rs771662    |
| rs76830538  | rs7688014   | rs76924002  | rs76969352  | rs77016368  | rs7706096   | rs77123275  | rs7716685   |
| rs768306493 | rs76880196  | rs76926608  | rs7696969   | rs77017252  | rs770611109 | rs7712401   | rs77167808  |
| rs76830943  | rs76880201  | rs7692808   | rs76969957  | rs770182365 | rs77061563  | rs77124424  | rs77168490  |
| rs76830965  | rs76880674  | rs76928645  | rs76970536  | rs7701842   | rs7706512   | rs7712601   | rs7717020   |
| rs76833264  | rs7688198   | rs76928871  | rs76970939  | rs7701886   | rs77065181  | rs77126132  | rs77170649  |
| rs76833657  | rs7688323   | rs7692921   | rs7697101   | rs7701967   | rs7706662   | rs7712641   | rs7717348   |
| rs7683416   | rs7688435   | rs76929617  | rs769712707 | rs770199    | rs770667    | rs771273709 | rs7717355   |
| rs7683856   | rs7688547   | rs7692976   | rs7697189   | rs7701990   | rs77069344  | rs77128495  | rs77173582  |
| rs7683893   | rs768863    | rs7692994   | rs7697216   | rs7702033   | rs77074394  | rs77128898  | rs7717417   |
| rs76839558  | rs76886731  | rs7692995   | rs76972608  | rs770214    | rs7707918   | rs77129413  | rs7717596   |
| rs768397327 | rs76887998  | rs76930569  | rs7697398   | rs77021467  | rs7707921   | rs7712983   | rs771767    |
| rs76840964  | rs76888257  | rs7693082   | rs76974091  | rs770222963 | rs7707931   | rs7712987   | rs7717697   |
| rs76841360  | rs76888998  | rs76930906  | rs7697461   | rs7702331   | rs7708378a  | rs7713065   | rs77177529  |
| rs76841737  | rs7689064   | rs7693161   | rs76974703  | rs7702415   | rs7708392   | rs7713145   | rs7717774   |
| rs7684221   | rs768910124 | rs7693253   | rs7697543   | rs77024938  | rs7708474   | rs77132247  | rs7717823   |
| rs7684253   | rs76891117  | rs76934034  | rs7697556   | rs770250170 | rs77085139  | rs77132325  | rs77178854  |
| rs76842834  | rs76891353  | rs769344141 | rs7697644   | rs770250902 | rs7708584   | rs7713317   | rs7717955   |
| rs7684446   | rs768917    | rs76934732  | rs76976871  | rs77025239  | rs7708610   | rs7713398   | rs77179555  |
| rs768447718 | rs7689238   | rs7693485   | rs76977261  | rs7702812   | rs77087078  | rs7713414   | rs77181415  |
| rs76846186  | rs7689420   | rs76935404  | rs769789    | rs7703022   | rs7708715   | rs77135925  | rs77182156  |
| rs7684645   | rs7689452   | rs769354275 | rs7698119   | rs7703051   | rs77087420  | rs77135980  | rs7718395   |
| rs7684769   | rs76894892  | rs7693605   | rs769818449 | rs770307181 | rs7708799   | rs77136196  | rs771846    |
| rs76848919  | rs76895963  | rs7693693   | rs7698250   | rs77031559  | rs7708822   | rs7713675   | rs7718928   |
| rs7684939   | rs7689609-C | rs7693703   | rs76982571  | rs77032081  | rs770899487 | rs7713825   | rs7719067   |
| rs7685059   | rs76897221  | rs76937529  | rs7698266   | rs7703260   | rs7709065   | rs7713972   | rs77191210  |
| rs76850604  | rs76898533  | rs7693958   | rs76983463  | rs77032877  | rs7709066   | rs7714219   | rs7719168   |
| rs76850691  | rs76899638  | rs7694000   | rs76984936  | rs77034375  | rs7709073   | rs7714232   | rs771924    |
| rs76850981  | rs76900683  | rs76940523  | rs7698692   | rs7703616   | rs77091928  | rs77142479  | rs7719289   |
| rs768512669 | rs76900795  | rs76942203  | rs76987554  | rs77036893  | rs7709194   | rs77143442  | rs771935377 |
| rs76851721  | rs76901167  | rs7694333   | rs7698984   | rs7703751   | rs7709212   | rs771435780 | rs7719499   |
| rs7685296   | rs76902898  | rs7694379   | rs76990766  | rs7703782   | rs7709291   | rs7714361   | rs7719676   |
| rs768541348 | rs76903431  | rs769446    | rs76990798  | rs7703857   | rs77092939  | rs7714426   | rs77198048  |
| rs76854344  | rs76904272  | rs769447487 | rs7699288   | rs77038697  | rs7709505   | rs771449536 | rs771985    |
| rs76854597  | rs76904484  | rs769449    | rs76994193  | rs7704053   | rs77096234  | rs7714574   | rs771988    |
| rs76855873  | rs76904798  | rs769450    | rs769950    | rs77040936  | rs7709630   | rs7714577   | rs7719885   |
| rs76856627  | rs769066    | rs769452    | rs76996928  | rs7704138   | rs7709645   | rs7714584   | rs7719891   |
| rs7685686   | rs7690761   | rs769452263 | rs7699711   | rs770414535 | rs770971500 | rs7714709   | rs7719972   |
| rs7685785   | rs769079    | rs7694531   | rs7699743   | rs7704297   | rs77097175  | rs7714712   | rs77199844  |
| rs7685862   | rs76908122  | rs769455    | rs76997592  | rs7704311   | rs7709909   | rs77147124  | rs77201694  |
| rs7686062   | rs769087    | rs76945759  | rs76997872  | rs77044968  | rs7709971   | rs7714719   | rs7720235   |
| rs76861316  | rs76908707  | rs7694707   | rs76998132  | rs770450501 | rs77099749  | rs77147683  | rs7720275   |
| rs7686205   | rs7690934   | rs7694879   | rs7699872   | rs7704551   | rs77099868  | rs771481    | rs7720298   |
| rs76863268  | rs76909456  | rs76949143  | rs77000060  | rs77046277  | rs77100210  | rs7714851   | rs772031    |
| rs76863441  | rs7691051   | rs7694958   | rs77000868  | rs770463    | rs77100309  | rs7714962   | rs77204473  |
| rs76864072  | rs7691121   | rs7695096   | rs7700107   | rs7704653   | rs77100396  | rs77149735  | rs7720626   |
| rs7686419   | rs769117329 | rs7695177   | rs7700110   | rs7705013   | rs77101145  | rs77150043  | rs772081778 |
| rs768651403 | rs76912608  | rs76953588  | rs7700167   | rs7705042   | rs771018    | rs77151304  | rs7720838   |
| rs7686569   | rs76913103  | rs76954792  | rs77001758  | rs7705069   | rs7710385   | rs7715147   | rs7720894   |
| rs7686608   | rs7691339   | rs76956521  | rs770030992 | rs7705093   | rs77105140  | rs7715167   | rs77209743  |
| rs76866386  | rs76913543  | rs7695698   | rs77004761  | rs770511518 | rs77105239  | rs7715256   | rs7721054   |
| rs7686660   | rs76913697  | rs76957426  | rs7700500   | rs7705189   | rs7710536   | rs77154778  | rs7721129   |
| rs7686818   | rs7691443   | rs76958245  | rs7700617   | rs77052120  | rs771061    | rs77155650  | rs772127444 |
| rs7686914   | rs769160064 | rs76958973  | rs7700687   | rs770537744 | rs77106231  | rs77157375  | rs7721375   |
| rs76869409  | rs7691759   | rs76959677  | rs77009508  | rs7705439   | rs7710854   | rs7715779   | rs77213763  |
| rs768695    | rs769178    | rs76960253  | rs77009694  | rs7705455   | rs7710925   | rs7715806   | rs77214504  |
| rs7687209   | rs76917914  | rs769623925 | rs7700970   | rs7705463   | rs77110056  | rs7715901   | rs77215549  |
| rs76872607  | rs76918166  | rs7696257   | rs7700998   | rs7705502   | rs77114534  | rs77159347  | rs77215829  |
| rs76873624  | rs7691825   | rs76962799  | rs7701003   | rs7705507   | rs7711650   | rs7716114   | rs7721608   |
| rs76874831  | rs76918518  | rs76963882  | rs77010081  | rs77055095  | rs7711696   | rs7716161   | rs7721613   |
| rs76875252  | rs7692102   | rs7696431   | rs77012907  | rs770551112 | rs7711823   | rs7716219   | rs772164657 |
| rs7687559   | rs7692161   | rs7696472   | rs7701292   | rs7705526   | rs771191353 | rs7716229   | rs77216612  |
| rs7687653   | rs76922886  | rs769651870 | rs77013160  | rs77056528  | rs771193934 | rs77162730  | rs7721678   |
| rs76876592  | rs76922914  | rs769662    | rs7701440   | rs7705653   | rs7712001   | rs77162945  | rs77216986  |
| rs7687708   | rs76923064  | rs7696658   | rs7701466   | rs77058023  | rs77120325  | rs77164426  | rs77217059  |
| rs7687819   | rs7692359   | rs76967117  | rs7701529   | rs77059113  | rs7712082   | rs7716447   | rs77217252  |
| rs76878669  | rs7692381   | rs7696796   | rs7701575   | rs77059132  | rs7712162   | rs77165542  | rs772178    |

|             |             |             |             |             |             |             |             |
|-------------|-------------|-------------|-------------|-------------|-------------|-------------|-------------|
| rs77222011  | rs7727738   | rs7732130   | rs77370942  | rs7742369   | rs7748513   | rs7753826   | rs7757969   |
| rs77224258  | rs7727787   | rs7732237   | rs7737179   | rs77424687  | rs774863287 | rs775400785 | rs7757975   |
| rs77225098  | rs7727800   | rs773225188 | rs77372977  | rs7742668   | rs77486408  | rs77541036  | rs7758002   |
| rs7722513   | rs77279095  | rs7732299   | rs7737302   | rs77427278  | rs7748725   | rs77541621  | rs7758080   |
| rs7722711   | rs7727978   | rs773235052 | rs773734568 | rs77428094  | rs77487268  | rs77542162  | rs775809675 |
| rs7722878   | rs7728093   | rs773248042 | rs77373975  | rs774284803 | rs77488208  | rs7754251   | rs7758115   |
| rs772294806 | rs77282844  | rs773257111 | rs77375493  | rs7743045   | rs7748918   | rs7754402   | rs7758128   |
| rs77231055  | rs77283305  | rs7732667   | rs77375846  | rs7743165   | rs77489951  | rs775444277 | rs77581390  |
| rs77234291  | rs7728402   | rs77327054  | rs7737693   | rs77431781  | rs774904233 | rs775450784 | rs7758229   |
| rs77234976  | rs77284161  | rs7732733   | rs77378263  | rs77432547  | rs77491205  | rs77545561  | rs775828150 |
| rs7723533   | rs77284350  | rs77328675  | rs77378271  | rs77432559  | rs7749223   | rs7754626   | rs77583790  |
| rs7723819   | rs772843886 | rs77328955  | rs7737905   | rs77432625  | rs7749305   | rs77546475  | rs7758383   |
| rs77238543  | rs7728609   | rs77330849  | rs77379230  | rs774361108 | rs7749390   | rs7754741   | rs77584654  |
| rs772389453 | rs7728612   | rs7733088   | rs7737940   | rs7743622   | rs77495054  | rs7754744   | rs7758512   |
| rs77239429  | rs7728690   | rs77331626  | rs773816354 | rs77436356  | rs7749543   | rs77547572  | rs7758630   |
| rs77241905  | rs7728694   | rs7733195   | rs77383637  | rs77436581  | rs77495508  | rs77547719  | rs7758644   |
| rs7724301   | rs7728751   | rs7733216   | rs7738395   | rs7743761   | rs77495688  | rs775481512 | rs77587000  |
| rs77243303  | rs77289077  | rs7733331   | rs7738702   | rs77438261  | rs7749578   | rs7754840   | rs7758776   |
| rs77243579  | rs7728912   | rs7733340   | rs77388365  | rs7743898   | rs7749695   | rs77548871  | rs7758816   |
| rs7724386   | rs77289848  | rs7733403   | rs7738842   | rs7744020   | rs7749708   | rs7754915   | rs7758845   |
| rs77244849  | rs772920    | rs7733410   | rs7738851   | rs77440492  | rs77497827  | rs7754916   | rs7758926   |
| rs77246175  | rs772921    | rs7733436   | rs7738892   | rs77440594  | rs7749823   | rs7754960   | rs77589760  |
| rs7724655   | rs7729301   | rs7733438   | rs7739124   | rs77440950  | rs7749944   | rs775498    | rs7759001   |
| rs772466360 | rs7729395   | rs7733470   | rs77392239  | rs7744143   | rs77502336  | rs7755      | rs775903554 |
| rs77246730  | rs77294520  | rs77335224  | rs7739232   | rs77441740  | rs7750288   | rs77551289  | rs7759066   |
| rs77248969  | rs7729471   | rs77335736  | rs7739264   | rs7744288   | rs7750292   | rs7755224   | rs7759114   |
| rs772490616 | rs77294902  | rs77336552  | rs773929421 | rs7744366   | rs77503578  | rs77552263  | rs775918206 |
| rs77249081  | rs772960943 | rs77339131  | rs77394059  | rs7744541   | rs7750458   | rs77553148  | rs7759215   |
| rs772494879 | rs77296290  | rs7733998   | rs77395168  | rs774469934 | rs77505915  | rs77553582  | rs77594504  |
| rs77249491  | rs7729647   | rs7734060   | rs77395336  | rs7744700   | rs7750641   | rs77554090  | rs7759516   |
| rs77250403  | rs772974873 | rs77340799  | rs77396063  | rs7744813   | rs7750688   | rs77554484  | rs7759613   |
| rs7725052   | rs772984386 | rs773410    | rs7739648   | rs7744833   | rs7750963   | rs7755467   | rs7759619   |
| rs7725078   | rs7729897   | rs773430    | rs7739842   | rs774485168 | rs77511173  | rs7755521   | rs7759633   |
| rs772513171 | rs7729945   | rs7734334   | rs7739844   | rs7744971   | rs77514138  | rs77556405  | rs775967694 |
| rs7725218   | rs773001561 | rs7734385   | rs774002109 | rs7745040   | rs77516118  | rs7755842   | rs7759742   |
| rs7725337   | rs77300440  | rs7734476   | rs77400868  | rs7745098   | rs77517838  | rs7755875   | rs77598468  |
| rs77254624  | rs77300780  | rs77345174  | rs7740107   | rs7745274   | rs775181992 | rs77559470  | rs7759938   |
| rs77255899  | rs77300868  | rs7734592   | rs7740188   | rs7745311   | rs7751865   | rs77559483  | rs7760082   |
| rs77256800  | rs77301115  | rs77346091  | rs77402029  | rs7746081   | rs77519307  | rs7756021   | rs7760535   |
| rs77257036  | rs773011284 | rs7734635   | rs7740339   | rs7746082   | rs775204216 | rs77560273  | rs77605964  |
| rs77258096  | rs773020    | rs7734927   | rs77403571  | rs7746199   | rs7752183   | rs77560793  | rs7760611   |
| rs77259676  | rs77303550  | rs7734992   | rs77403728  | rs77463367  | rs7752195   | rs7756117   | rs77606322  |
| rs77261131  | rs77307099  | rs773502414 | rs7740395   | rs77463690  | rs77522     | rs7756236   | rs77606373  |
| rs77261529  | rs7730817   | rs77350364  | rs7740449   | rs77464186  | rs77522818  | rs775633    | rs776074878 |
| rs7726159   | rs7730838   | rs77350683  | rs77406149  | rs7746459   | rs7752448   | rs7756435   | rs7760841   |
| rs77261872  | rs7730898   | rs7735176   | rs77406312  | rs7746589   | rs775249    | rs77566474  | rs7760949   |
| rs77262773  | rs7730934   | rs77351827  | rs77407216  | rs77466051  | rs7752577   | rs7756651   | rs7760951   |
| rs7726354   | rs773095550 | rs7735249   | rs77409432  | rs77466626  | rs7752579   | rs7756935   | rs77609760  |
| rs7726414   | rs773107    | rs7735282   | rs7741021   | rs7746708   | rs77526211  | rs77569859  | rs776111176 |
| rs772650273 | rs773110    | rs7735408   | rs77410716  | rs7746716   | rs7752666   | rs7756992   | rs77611224  |
| rs77265382  | rs7731168   | rs773541730 | rs7741085   | rs77468143  | rs77527100  | rs775701197 | rs7761177   |
| rs77265585  | rs773118143 | rs7735519   | rs7741091   | rs7747      | rs77527369  | rs7757144   | rs7761182   |
| rs772675085 | rs77312476  | rs77356147  | rs7741164   | rs77470370  | rs77527549  | rs77571736  | rs77612020  |
| rs7726839   | rs773125    | rs77356530  | rs77413490  | rs77470973  | rs77528541  | rs7757193   | rs7761231   |
| rs772695095 | rs77314340  | rs77357563  | rs77414181  | rs7747136   | rs7752903   | rs77572283  | rs77612799  |
| rs77269753  | rs77315098  | rs7735794   | rs77417259  | rs7747236   | rs7752998   | rs77572354  | rs77613911  |
| rs77269791  | rs7731542   | rs7735958   | rs7741741   | rs7747253   | rs7753012   | rs775736    | rs7761673   |
| rs7727117   | rs7731588   | rs7736177   | rs77418166  | rs77475884  | rs77531286  | rs775737239 | rs7761746   |
| rs77271426  | rs7731626   | rs7736264   | rs77418927  | rs77476644  | rs775326    | rs77573793  | rs77620124  |
| rs77271542  | rs77316573  | rs77363656  | rs7742030   | rs7747752   | rs77532868  | rs7757419   | rs77622099  |
| rs7727176   | rs7731703   | rs7736377   | rs77420391  | rs77479550  | rs77532903  | rs77574378  | rs77625270  |
| rs77272589  | rs7731717   | rs7736576   | rs77420750  | rs77481436  | rs77533229  | rs775758    | rs7762532   |
| rs77273076  | rs77320622  | rs7736817   | rs774211    | rs77482156  | rs77533969  | rs77576048  | rs77625458  |
| rs7727320   | rs7732063   | rs7736883   | rs77422089  | rs7748270   | rs77534600  | rs775766    | rs77625597  |
| rs7727485   | rs77320796  | rs77370297  | rs774224295 | rs7748275   | rs7753558   | rs77576965  | rs7762731   |
| rs772748664 | rs773210894 | rs773704914 | rs77422711  | rs77483376  | rs7753563   | rs77578010  | rs776293589 |
| rs7727544   | rs7732125   | rs77370934  | rs7742292   | rs77484855  | rs7753695   | rs77578042  | rs776296821 |

|             |             |             |             |             |             |             |             |
|-------------|-------------|-------------|-------------|-------------|-------------|-------------|-------------|
| rs77630070  | rs7766720   | rs77713877  | rs7776707   | rs77815064  | rs7786619   | rs7791992   | rs779665214 |
| rs77630528  | rs7766749   | rs77713896  | rs7776725   | rs7781509   | rs77866798  | rs779206    | rs779672112 |
| rs7763064   | rs77669868  | rs7771547   | rs77767415  | rs7781571   | rs77866843  | rs77924615  | rs7796785   |
| rs77631110  | rs77669894  | rs7771570   | rs7776744   | rs77816630  | rs7786706   | rs77925174  | rs77969347  |
| rs77631377  | rs77671253  | rs77717551  | rs77767830  | rs77819282  | rs77867423  | rs7792525   | rs77969686  |
| rs7763181   | rs776715248 | rs77718124  | rs7776786   | rs7781964   | rs7786820   | rs77926279  | rs77971272  |
| rs7763262   | rs7767188   | rs7771911   | rs77768175  | rs7782210   | rs7786873   | rs77926410  | rs77971861  |
| rs7763264   | rs77672322  | rs77719387  | rs77768193  | rs7782219   | rs7786877   | rs77927866  | rs7797205   |
| rs7763294   | rs7767288   | rs77719426  | rs7776857   | rs7782243   | rs7786883   | rs7792825   | rs77972171  |
| rs7763350   | rs7767355   | rs77719795  | rs7776974   | rs77822621  | rs77870048  | rs77928427  | rs77972482  |
| rs7763358   | rs7767396   | rs77721014  | rs7777054   | rs77822827  | rs77871185  | rs7792856   | rs7797255   |
| rs77633900  | rs77673991  | rs7772160   | rs7777063   | rs7782328   | rs77871618  | rs7792864   | rs77972791  |
| rs7763421   | rs776746    | rs7772172   | rs7777084   | rs778239811 | rs778732    | rs77929563  | rs77972916  |
| rs7763441   | rs77675579  | rs7772202   | rs77770952  | rs77824033  | rs77874075  | rs77929895  | rs77972946  |
| rs77635018  | rs77676437  | rs7772473   | rs7777102   | rs77826402  | rs77874174  | rs7793008   | rs7797307   |
| rs7763558   | rs77677521  | rs7772486   | rs7777484   | rs7782730   | rs778756    | rs7793034   | rs7797401   |
| rs7763581   | rs776777733 | rs77725620  | rs77775907  | rs77828979  | rs77876222  | rs779311134 | rs77974343  |
| rs77636220  | rs77679347  | rs7772565   | rs7777647   | rs77829136  | rs7787720   | rs779314480 | rs7797559   |
| rs7763660   | rs7768116   | rs7772579   | rs77776598  | rs7783012   | rs77877421  | rs77931950  | rs7797644   |
| rs7763910   | rs7768235   | rs7772603   | rs77777548  | rs77831929  | rs77878271  | rs7793359   | rs77976727  |
| rs7764016   | rs77682417  | rs7772614   | rs777786730 | rs7783256   | rs77878475  | rs7793408   | rs77978149  |
| rs776404283 | rs7768382   | rs77729186  | rs77778931  | rs7783339   | rs7787893   | rs77936863  | rs77978620  |
| rs77640775  | rs77684884  | rs7773004   | rs77779142  | rs7783359   | rs7787942   | rs7793739   | rs7797976   |
| rs77641763  | rs77685055  | rs777300465 | rs77780456  | rs77834246  | rs778798    | rs779388    | rs7798002   |
| rs77642031  | rs7768644   | rs7773141   | rs77781418  | rs7783517   | rs778800    | rs779390    | rs7798061   |
| rs776434    | rs776871909 | rs77731990  | rs7778167   | rs778352    | rs7788008   | rs7793919   | rs7798146   |
| rs7764472   | rs776877    | rs77732866  | rs7778378   | rs778353    | rs7788086   | rs7793921   | rs77981966  |
| rs7764488   | rs77688320  | rs7773324   | rs7778443   | rs778368    | rs778809    | rs779396    | rs7798256   |
| rs7764523   | rs7769      | rs77733403  | rs7778451   | rs778371    | rs77881454  | rs7794036   | rs77983490  |
| rs77645768  | rs776905    | rs77733682  | rs7778596   | rs7783857   | rs77881626  | rs7794048   | rs7798431   |
| rs776472    | rs7769059   | rs77733744  | rs77786029  | rs778387    | rs77882887  | rs77940566  | rs77984450  |
| rs7764819   | rs7769061   | rs77734239  | rs77786465  | rs7784066   | rs77884860  | rs7794185   | rs77984483  |
| rs77648599  | rs7769089   | rs7773781   | rs777869430 | rs778416    | rs7788849   | rs7794187   | rs77985577  |
| rs77648771  | rs77691416  | rs77738210  | rs7778729   | rs77842897  | rs77888920  | rs77942338  | rs7798566   |
| rs77649854  | rs7769142   | rs7773987   | rs7778975   | rs77844289  | rs7788935   | rs7794284   | rs779862    |
| rs776509440 | rs7769192   | rs7773995   | rs77790520  | rs7784465   | rs77889556  | rs779429062 | rs77987196  |
| rs77652395  | rs77692382  | rs7774      | rs7779072   | rs77844865  | rs7788962   | rs77944304  | rs7798739   |
| rs776531974 | rs77692990  | rs77741622  | rs7779181   | rs77844870  | rs7789097   | rs77944668  | rs7798875   |
| rs77653640  | rs7769306   | rs77741769  | rs77792157  | rs7784668   | rs7789146   | rs77944739  | rs7798894   |
| rs7765379   | rs77695390  | rs7774434   | rs7779253   | rs7784708   | rs7789162   | rs779470261 | rs77989568  |
| rs7765503   | rs7769568   | rs7774567   | rs77795715  | rs7784748   | rs7789303   | rs77947762  | rs77990856  |
| rs77655131  | rs7769594   | rs77748726  | rs77795865  | rs7784776   | rs7789337   | rs7794796   | rs7799110   |
| rs7765526   | rs77697190  | rs7775055   | rs77797441  | rs7784802   | rs7789405   | rs7795061   | rs7799141   |
| rs7765757   | rs77697233  | rs7775090   | rs77798223  | rs77848106  | rs7789516   | rs77951490  | rs7799249   |
| rs7765815   | rs77697917  | rs77750939  | rs7780001   | rs7784849   | rs7789569   | rs77951645  | rs779929745 |
| rs7765828   | rs7769879   | rs7775100   | rs7780066   | rs7785013   | rs77897572  | rs7795180   | rs779933    |
| rs7765892   | rs7769879-? | rs777513    | rs77803072  | rs7785014   | rs778986    | rs779518917 | rs7799410   |
| rs77660021  | rs7770062   | rs7775228   | rs7780389   | rs77853392  | rs77899120  | rs7795281   | rs7799441   |
| rs776601    | rs77700841  | rs77752517  | rs77804065  | rs77853563  | rs7789916   | rs7795282   | rs77994712  |
| rs7766060   | rs77701059  | rs77753011  | rs7780423   | rs7785360   | rs7790014   | rs7795371   | rs77998125  |
| rs7766070   | rs77701734  | rs7775397   | rs77804393  | rs778537602 | rs779008104 | rs77954449  | rs77998199  |
| rs7766106   | rs77702622  | rs77754964  | rs77804600  | rs77855457  | rs77901643  | rs77956314  | rs779995    |
| rs7766116   | rs77702819  | rs7775526   | rs7780562   | rs7785662   | rs7790498   | rs779565896 | rs77999825  |
| rs77661738  | rs7770370   | rs7775554   | rs77805826  | rs7785663   | rs77905678  | rs779566246 | rs7800001   |
| rs7766224   | rs7770391   | rs77756595  | rs77808099  | rs778571122 | rs77907512  | rs7795865   | rs7800072   |
| rs7766240   | rs77704739  | rs7775698   | rs77808205  | rs778583    | rs7790961   | rs7795873   | rs7800191   |
| rs7766336   | rs7770615   | rs7775721   | rs778094    | rs7785898   | rs77909720  | rs7795886   | rs780024    |
| rs7766356   | rs7770628   | rs7775754   | rs77810251  | rs778591    | rs7791070   | rs77959102  | rs7800245   |
| rs7766436   | rs7770794   | rs7775791   | rs7781126   | rs778593    | rs77911174  | rs77959151  | rs78003500  |
| rs7766444   | rs7770810   | rs7775835   | rs778124    | rs778601    | rs7791133   | rs77960     | rs78003935  |
| rs7766497   | rs7770860   | rs777592    | rs778125    | rs7786095   | rs77915397  | rs77960347  | rs7800558   |
| rs7766549   | rs7770868   | rs7776010   | rs7781265   | rs7786102   | rs77915916  | rs7796089   | rs7800573   |
| rs77665773  | rs7770889   | rs7776021   | rs7781266   | rs77861329  | rs77916918  | rs7796103   | rs7800879   |
| rs7766610   | rs7770957   | rs7776054   | rs7781279   | rs7786376   | rs7791726   | rs77962418  | rs780088    |
| rs77666400  | rs77711156  | rs777616140 | rs7781370   | rs778640369 | rs77917390  | rs7796370   | rs780092    |
| rs7766641   | rs777116077 | rs7776303   | rs778138    | rs77864822  | rs77918915  | rs779655    | rs780093    |
| rs77666565  | rs7771320   | rs7776701   | rs7781440   | rs7786560   | rs77919370  | rs77966298  | rs780094    |



|             |             |             |             |             |             |            |            |
|-------------|-------------|-------------|-------------|-------------|-------------|------------|------------|
| rs7800944   | rs780569    | rs78098692  | rs78146603  | rs7819525   | rs78241494  | rs78296773 | rs7834729  |
| rs780095    | rs78057054  | rs780989226 | rs7814757   | rs7819570   | rs78242064  | rs78297031 | rs7834745  |
| rs78010183  | rs7805747   | rs7809934   | rs7814758   | rs7819592   | rs78242412  | rs782971   | rs7834797  |
| rs7801037   | rs7805790   | rs7809950   | rs78147778  | rs7819593   | rs7824394   | rs78297458 | rs7835108  |
| rs7801062   | rs7805792   | rs78099598  | rs78148157  | rs7819602   | rs78245381  | rs782988   | rs78352137 |
| rs78011401  | rs78057960  | rs7809981   | rs7814925   | rs7819881   | rs78245495  | rs7829912  | rs78352159 |
| rs7801190   | rs78058068  | rs781006834 | rs7814941   | rs78198962  | rs78245588  | rs78299451 | rs783537   |
| rs7801305   | rs78058190  | rs78101726  | rs78149767  | rs781990170 | rs7824610   | rs78299715 | rs7835379  |
| rs7801375   | rs78058594  | rs7810260   | rs78150433  | rs781996653 | rs7824715   | rs7829975  | rs783540   |
| rs780142    | rs7805890   | rs78103586  | rs7815105   | rs7819986   | rs78248023  | rs7830123  | rs7835492  |
| rs78014510  | rs780590302 | rs78105394  | rs78151190  | rs7820146   | rs78248083  | rs78302204 | rs78355601 |
| rs780151    | rs78059684  | rs7810606   | rs78151625  | rs78201785  | rs7824937   | rs7830416  | rs7835672  |
| rs78015114  | rs7806003   | rs78107966  | rs78152188  | rs7820212   | rs7824993   | rs78305993 | rs7835803  |
| rs78015143  | rs7806045   | rs78108344  | rs7815294   | rs78202598  | rs78251123  | rs78307470 | rs78358631 |
| rs7801581   | rs7806224   | rs78110044  | rs7815429   | rs7820334   | rs782511737 | rs7830804  | rs78358737 |
| rs78015841  | rs78062588  | rs7811142   | rs781544056 | rs7820612   | rs7825157   | rs7830832  | rs78359342 |
| rs780159    | rs780634    | rs78112569  | rs78155705  | rs78206187  | rs7825175   | rs7830900  | rs783621   |
| rs78018097  | rs7806365   | rs7811265   | rs7815615   | rs7820676   | rs782520    | rs7830933  | rs78363913 |
| rs78018265  | rs7806429   | rs7811417   | rs781567    | rs78207084  | rs78252812  | rs7830939  | rs783646   |
| rs78020297  | rs78064607  | rs781142826 | rs78157521  | rs78207142  | rs78252854  | rs78310016 | rs78365243 |
| rs78020898  | rs78066960  | rs78114378  | rs7815909   | rs7820881   | rs78254601  | rs78311490 | rs7836653  |
| rs7802124   | rs78068712  | rs78114600  | rs7815955   | rs782100977 | rs7825742   | rs78312641 | rs78366565 |
| rs7802313   | rs78069066  | rs7811543   | rs78162728  | rs7821092   | rs78258966  | rs78314652 | rs78366551 |
| rs7802342   | rs7807019   | rs78116078  | rs7816345   | rs78210986  | rs782590    | rs783147   | rs78367065 |
| rs7802450   | rs7807296   | rs7811653   | rs78163832  | rs78211770  | rs782602858 | rs78314758 | rs7836786  |
| rs7802459   | rs780739015 | rs78116891  | rs78164635  | rs7821178   | rs78260322  | rs7831491  | rs78368496 |
| rs78024727  | rs78074478  | rs781191470 | rs78165052  | rs78212183  | rs78261031  | rs783150   | rs78368565 |
| rs7802500   | rs78074823  | rs78119163  | rs7816579   | rs782122127 | rs7826177   | rs7831557  | rs78368589 |
| rs78025076  | rs7807490   | rs7811921   | rs781658    | rs7821259   | rs7826222   | rs78319058 | rs7836983  |
| rs7802541   | rs7807555   | rs7812039   | rs7816657   | rs78212733  | rs7826238   | rs78320035 | rs78369934 |
| rs78025620  | rs7807677   | rs7812088   | rs78166579  | rs7821292   | rs7826246   | rs7832014  | rs7837005  |
| rs78025940  | rs7807720   | rs7812293   | rs781671072 | rs7821292   | rs7826306   | rs78321654 | rs7837090  |
| rs78026509  | rs78077967  | rs7812312   | rs7816777   | rs7821330   | rs7826312   | rs7832219  | rs78374304 |
| rs7802895   | rs78078856  | rs78123380  | rs7816792   | rs78213340  | rs7826312   | rs7832219  | rs78374304 |
| rs7802996   | rs78079206  | rs78123380  | rs7816792   | rs782134971 | rs7826487   | rs78322942 | rs7837513  |
| rs78030362  | rs78079366  | rs78123903  | rs78168201  | rs7821592   | rs7826493   | rs7832357  | rs7837520  |
| rs7803075   | rs7808005   | rs78124867  | rs7816934   | rs782159242 | rs78265569  | rs78324273 | rs7837523  |
| rs780309846 | rs7808005   | rs781255974 | rs78169557  | rs7821604   | rs7826830   | rs78324365 | rs78376313 |
| rs7803297   | rs78081685  | rs78127965  | rs78170284  | rs7821812   | rs78268384  | rs78325334 | rs7837649  |
| rs7803297   | rs7808296   | rs7812843   | rs7817087   | rs78219026  | rs7826964   | rs7832552  | rs7837688  |
| rs7803355   | rs7808347   | rs7812879   | rs7817124   | rs78219651  | rs78269692  | rs78325861 | rs783779   |
| rs78033733  | rs7808353   | rs781289    | rs78171803  | rs782207    | rs78270331  | rs7832643  | rs7837791  |
| rs78033862  | rs78084033  | rs781289    | rs78171803  | rs782207398 | rs78270331  | rs7832643  | rs7837791  |
| rs780340856 | rs7808442   | rs781293043 | rs7817485   | rs782207398 | rs782717432 | rs7832708  | rs78378222 |
| rs78034425  | rs7808442   | rs78131250  | rs781751875 | rs782212    | rs7827176   | rs7832776  | rs7837935  |
| rs7803454   | rs7808457   | rs7813157   | rs78175438  | rs782214    | rs7827182   | rs7832968  | rs78381359 |
| rs7803527   | rs78084721  | rs78132593  | rs7817574   | rs7822232   | rs782725    | rs78329830 | rs78381888 |
| rs78037977  | rs7808581   | rs78132896  | rs7817581   | rs78223541  | rs78274378  | rs783301   | rs78382112 |
| rs7803882   | rs7808613   | rs781329210 | rs7817662   | rs782241625 | rs78277363  | rs7833174  | rs78382342 |
| rs7803932   | rs78086267  | rs7813389   | rs7817815   | rs7822459   | rs78277783  | rs7833199  | rs7838353  |
| rs7804185   | rs7808664   | rs7813395   | rs78178505  | rs7822494   | rs78277894  | rs78332318 | rs7838611  |
| rs78042854  | rs78087596  | rs78134132  | rs78180894  | rs7822515   | rs78278054  | rs7833370  | rs7838717  |
| rs7804306   | rs7808766   | rs78134181  | rs78182250  | rs78229644  | rs7827839   | rs78333947 | rs78387210 |
| rs780432508 | rs78088233  | rs7813423   | rs781831    | rs7823032   | rs7828      | rs7833518  | rs7838781  |
| rs7804356   | rs7808835   | rs78134612  | rs781832    | rs7823056   | rs78280128  | rs78335699 | rs78388484 |
| rs7804463   | rs7808935   | rs78135803  | rs78183295  | rs7823059   | rs7828059   | rs78337797 | rs78388920 |
| rs78046470  | rs7809058   | rs7813624   | rs7818437   | rs7823072   | rs7828279   | rs7833924  | rs78389809 |
| rs78046549  | rs7809066   | rs78136548  | rs781852    | rs78233181  | rs7828501   | rs78339356 | rs78390049 |
| rs78049001  | rs7809197   | rs7813776   | rs7818560   | rs7823327   | rs78287392  | rs7833986  | rs7839059  |
| rs78049276  | rs7809234   | rs78139258  | rs781858752 | rs78233471  | rs7828742   | rs78341008 | rs78393402 |
| rs7805063   | rs7809237   | rs7813952   | rs7818688   | rs7823561   | rs78287639  | rs7834111  | rs78394231 |
| rs7805114   | rs780927    | rs78139700  | rs7818891   | rs7823698   | rs78287738  | rs7834121  | rs7839441  |
| rs78051198  | rs7809303   | rs7814022   | rs7819099   | rs7823699   | rs78287937  | rs7834152  | rs7839488  |
| rs780518365 | rs78094270  | rs7814131   | rs78192203  | rs7823700   | rs78290674  | rs78341827 | rs7839516  |
| rs7805378   | rs78095690  | rs7814267   | rs78192244  | rs78238620  | rs78290798  | rs78342753 | rs78399419 |
| rs78053957  | rs78095701  | rs781429397 | rs7819276   | rs78239375  | rs7829127   | rs7834300  | rs78399431 |
| rs7805419   | rs7809597   | rs781438112 | rs78193153  | rs78239456  | rs78295286  | rs78343493 | rs7840202  |
| rs7805441   | rs7809615   | rs78144291  | rs7819412   | rs78239784  | rs7829639   | rs7834364  | rs7840212  |
|             | rs7809799   | rs7814625   | rs78194510  | rs78241246  | rs78296744  | rs78346539 | rs7840305  |

|            |            |            |            |            |            |            |            |
|------------|------------|------------|------------|------------|------------|------------|------------|
| rs78404259 | rs7845515  | rs7850871  | rs78565404 | rs7864027  | rs7869321  | rs7874604  | rs78841413 |
| rs78404578 | rs78455250 | rs7851057  | rs78565420 | rs786406   | rs7869353  | rs78746179 | rs7884765  |
| rs7840525  | rs78456138 | rs7851246  | rs78566116 | rs7864098  | rs7869441  | rs78746532 | rs78850189 |
| rs78406497 | rs78456152 | rs78513878 | rs78570658 | rs7864127  | rs78694551 | rs78748598 | rs78851119 |
| rs78408340 | rs7845620  | rs7851437  | rs78572108 | rs7864171  | rs7869487  | rs787488   | rs78852656 |
| rs78408772 | rs7845701  | rs78514374 | rs78572940 | rs786420   | rs7869524  | rs7874991  | rs78853648 |
| rs7841082  | rs7845722  | rs7851507  | rs7857345  | rs7864387  | rs7869550  | rs7875078  | rs78853790 |
| rs7841189  | rs78457311 | rs7851531  | rs7857390  | rs7864482  | rs78695585 | rs7875291  | rs78857879 |
| rs7841297  | rs78457529 | rs7851623  | rs7857594  | rs7864648  | rs7869668  | rs787540   | rs78862468 |
| rs7841320  | rs78458145 | rs78516619 | rs78576899 | rs78648104 | rs7869756  | rs787541   | rs78862524 |
| rs78415359 | rs78459082 | rs7851693  | rs78579285 | rs78648341 | rs78697948 | rs7875870  | rs78862952 |
| rs78417468 | rs78460259 | rs7851696  | rs78580402 | rs78649275 | rs7869969  | rs78760431 | rs78863192 |
| rs78417933 | rs78460763 | rs78517245 | rs78580841 | rs78649910 | rs78699863 | rs78761021 | rs78863347 |
| rs7841822  | rs78461223 | rs78518764 | rs78582080 | rs786504   | rs78702390 | rs78762153 | rs78865058 |
| rs7841921  | rs7846135  | rs78520297 | rs785830   | rs7865362  | rs78703482 | rs78763922 | rs78866567 |
| rs7841949  | rs78461719 | rs7852065  | rs785836   | rs78654087 | rs7870475  | rs78765360 | rs78867455 |
| rs78420139 | rs7846314  | rs7852129  | rs78585807 | rs78655189 | rs78705757 | rs78765971 | rs78869060 |
| rs78420228 | rs7846385  | rs78521489 | rs7858727  | rs78655848 | rs78706986 | rs78767748 | rs7886910  |
| rs784219   | rs78464352 | rs7852169  | rs7858732  | rs7865618  | rs78707197 | rs78768527 | rs788711   |
| rs7842389  | rs7846466  | rs78521699 | rs78588220 | rs7865762  | rs7870753  | rs78769612 | rs78871791 |
| rs784242   | rs7846485  | rs7852363  | rs78588343 | rs78658973 | rs78707713 | rs78770234 | rs78873257 |
| rs784256   | rs78470967 | rs7852462  | rs7858917  | rs7865928  | rs78708399 | rs78771333 | rs7887866  |
| rs784257   | rs78471838 | rs78526584 | rs7858961  | rs7866211  | rs7870900  | rs78773383 | rs788790   |
| rs78426265 | rs78472887 | rs7852872  | rs78590213 | rs7866254  | rs7870976  | rs78777685 | rs78879665 |
| rs7842666  | rs78474310 | rs785293   | rs7859034  | rs78663649 | rs78710246 | rs78781079 | rs78885399 |
| rs78428146 | rs7847526  | rs78530397 | rs78592865 | rs78665015 | rs7871395  | rs78781855 | rs788858   |
| rs78428340 | rs7847628  | rs78530667 | rs78593564 | rs7866503  | rs78714229 | rs78784145 | rs78886584 |
| rs78428793 | rs7847663  | rs7853207  | rs7859472  | rs78667121 | rs7871426  | rs78784853 | rs788867   |
| rs784288   | rs78476878 | rs7853287  | rs78595509 | rs78667595 | rs78715178 | rs78793397 | rs78889    |
| rs78429216 | rs7847695  | rs7853365  | rs78595707 | rs7866783  | rs78716942 | rs78795075 | rs7889011  |
| rs7842996  | rs78476982 | rs78534766 | rs78595810 | rs7866863  | rs78718189 | rs7879546  | rs78890745 |
| rs7843024  | rs78478398 | rs7853479  | rs7859727  | rs7866897  | rs7871866  | rs78795651 | rs78893982 |
| rs7843031  | rs78478514 | rs78536982 | rs78598096 | rs7866939  | rs78719460 | rs787988   | rs78894077 |
| rs78430868 | rs7847854  | rs78537674 | rs7859905  | rs7866966  | rs78720888 | rs787989   | rs78895722 |
| rs78431498 | rs7847934  | rs78539082 | rs78599561 | rs78669990 | rs7872188  | rs7879933  | rs78898421 |
| rs78432519 | rs78479381 | rs7853970  | rs78601235 | rs78670122 | rs7872329  | rs78799967 | rs78900282 |
| rs78432537 | rs78479673 | rs7854043  | rs78603540 | rs78670237 | rs78727187 | rs788021   | rs78900934 |
| rs784330   | rs784819   | rs78540526 | rs7860361  | rs78672637 | rs78727559 | rs78803556 | rs78903944 |
| rs7843470  | rs7848215  | rs7854118  | rs7860397  | rs7867310  | rs7872800  | rs7880414  | rs78905543 |
| rs7843475  | rs78483393 | rs785422   | rs7860634  | rs7867618  | rs7872863  | rs788076   | rs78907487 |
| rs7843479  | rs78484485 | rs785429   | rs78607331 | rs7867635  | rs7873025  | rs78807762 | rs78907924 |
| rs78438678 | rs78484822 | rs78542921 | rs78608249 | rs78676546 | rs7873096  | rs78808084 | rs78908135 |
| rs78438709 | rs78484886 | rs7854383  | rs7861040  | rs78676616 | rs7873152  | rs78809737 | rs78909033 |
| rs78439586 | rs78486117 | rs7854413  | rs7861055  | rs78676690 | rs7873387  | rs78810186 | rs78909240 |
| rs78440108 | rs7848647  | rs78545713 | rs78614739 | rs78677343 | rs78733883 | rs78812993 | rs78912080 |
| rs78440611 | rs78487206 | rs78545931 | rs78615563 | rs7867822  | rs7873389  | rs78813423 | rs78918150 |
| rs78440618 | rs78487399 | rs78546080 | rs7861718  | rs7867909  | rs7873409  | rs78815801 | rs78922867 |
| rs784420   | rs78490142 | rs78546106 | rs7861820  | rs78681500 | rs7873463  | rs788163   | rs78926127 |
| rs7844233  | rs7849270  | rs78547376 | rs7861829  | rs78683083 | rs7873551  | rs788171   | rs7892835  |
| rs78442819 | rs7849280  | rs785482   | rs7861925  | rs78684352 | rs78737026 | rs78817479 | rs78928643 |
| rs78444298 | rs7849438  | rs7854962  | rs7861975  | rs78685880 | rs78737365 | rs78818722 | rs78928932 |
| rs78445564 | rs7849480  | rs7855188  | rs78620885 | rs78686130 | rs78738012 | rs788210   | rs789294   |
| rs7844586  | rs7849487  | rs7855251  | rs7862229  | rs7868669  | rs7873822  | rs78821730 | rs789298   |
| rs78446341 | rs7849530  | rs78553679 | rs78623258 | rs7868737  | rs78738581 | rs788219   | rs7893136  |
| rs78448052 | rs7849537  | rs7855395  | rs7862400  | rs78687573 | rs7873907  | rs78821961 | rs7893279  |
| rs784487   | rs78495697 | rs78554043 | rs786244   | rs7868781  | rs7873964  | rs78823938 | rs7893324  |
| rs7844887  | rs7849587  | rs7855503  | rs786247   | rs78688302 | rs7874154  | rs78824256 | rs7893467  |
| rs78449170 | rs78496852 | rs78555129 | rs786250   | rs78689694 | rs78742138 | rs7882858  | rs789351   |
| rs7844965  | rs78498439 | rs7855586  | rs78625142 | rs7868984  | rs7874244  | rs78829811 | rs7893571  |
| rs784504   | rs7850041  | rs78556383 | rs78625720 | rs78689878 | rs78743131 | rs78830644 | rs78936632 |
| rs7845090  | rs78501968 | rs78560100 | rs78627331 | rs7868992  | rs78743535 | rs7883218  | rs7893734  |
| rs7845219  | rs78502100 | rs7856039  | rs78631600 | rs786906   | rs7874405  | rs78832434 | rs78937603 |
| rs7845221  | rs7850258  | rs7856073  | rs78633727 | rs786913   | rs78744187 | rs78834970 | rs7893940  |
| rs78452560 | rs78503047 | rs78560760 | rs78634107 | rs786914   | rs78744550 | rs78835388 | rs7893954  |
| rs78452735 | rs7850364  | rs78561501 | rs7863470  | rs786919   | rs78744936 | rs78838977 | rs78939929 |
| rs7845305  | rs78503944 | rs7856420  | rs7863616  | rs7869196  | rs78745308 | rs78839561 | rs7894027  |
| rs78454115 | rs78508049 | rs7856424  | rs786391   | rs78692246 | rs78745329 | rs78841189 | rs7894051  |

|            |            |            |            |            |            |            |            |
|------------|------------|------------|------------|------------|------------|------------|------------|
| rs7894089  | rs78999781 | rs7906312  | rs79121763 | rs7917983  | rs7924005  | rs79292568 | rs7935422  |
| rs78943124 | rs7900002  | rs7906315  | rs791218   | rs79180767 | rs7924036  | rs7929392  | rs793545   |
| rs78943174 | rs7900112  | rs7906360  | rs7912226  | rs79180837 | rs7924176  | rs79294353 | rs79354983 |
| rs78943308 | rs7900129  | rs79064296 | rs7912283  | rs7918084  | rs7924237  | rs7929518  | rs7935528  |
| rs7894407  | rs7900144  | rs790647   | rs7912336  | rs79181084 | rs7924431  | rs7929541  | rs79356439 |
| rs7894531  | rs79001489 | rs7906649  | rs79124267 | rs7918265  | rs792448   | rs7929543  | rs793571   |
| rs7894565  | rs7900372  | rs79066979 | rs7912454  | rs7918400  | rs7924522  | rs79295525 | rs79357714 |
| rs78946096 | rs79007183 | rs79067846 | rs7912521  | rs7918405  | rs79245415 | rs79296534 | rs7935829  |
| rs7894722  | rs7900751  | rs7906958  | rs79125854 | rs7918642  | rs7924703  | rs7929679  | rs79359914 |
| rs7894791  | rs79009632 | rs79070372 | rs7912685  | rs79187193 | rs7924772  | rs7929717  | rs793607   |
| rs78948780 | rs79009737 | rs7907173  | rs7912777  | rs7918807  | rs79247733 | rs7929962  | rs7936070  |
| rs7895108  | rs79010100 | rs79072821 | rs79128089 | rs79190537 | rs7924896  | rs79301522 | rs79361534 |
| rs7895133  | rs7901016  | rs79073424 | rs7912830  | rs7919055  | rs79249417 | rs7930161  | rs7936247  |
| rs7895261  | rs7901056  | rs7907361  | rs7913069  | rs79192570 | rs7924975  | rs79308158 | rs7936275  |
| rs7895470  | rs79011195 | rs79075676 | rs7913179  | rs7919533  | rs79250370 | rs7930976  | rs7936300  |
| rs7895716  | rs79016257 | rs7907606  | rs79131845 | rs7919656  | rs7925100  | rs79310463 | rs7936312  |
| rs7895872  | rs7901695  | rs7907645  | rs79134766 | rs7919685  | rs7925150  | rs79310511 | rs7936323  |
| rs7895991  | rs7901883  | rs79076992 | rs7913496  | rs7919758  | rs79252156 | rs793108   | rs7936397  |
| rs7896076  | rs79021925 | rs7907770  | rs791357   | rs7919823  | rs7925256  | rs7931109  | rs7936413  |
| rs7896133  | rs79022003 | rs7907900  | rs7913802  | rs79200132 | rs7925523  | rs79311290 | rs7936434  |
| rs78961851 | rs7902274  | rs79079163 | rs79139602 | rs79202680 | rs7925560  | rs7931302  | rs79364962 |
| rs78963197 | rs7902343  | rs79079378 | rs79139724 | rs79204944 | rs7925585  | rs7931342  | rs7936522  |
| rs7896335  | rs7902460  | rs7908463  | rs7914056  | rs7920501  | rs79257300 | rs7931398  | rs7936534  |
| rs7896356  | rs7902527  | rs79084672 | rs7914158  | rs7920589  | rs79259450 | rs7931462  | rs79366678 |
| rs7896371  | rs7902581  | rs7908585  | rs7914178  | rs79206101 | rs79259707 | rs7931483  | rs79367487 |
| rs7896471  | rs7902587  | rs7908590  | rs7914287  | rs7920624  | rs79260345 | rs7931563  | rs7936821  |
| rs7896505  | rs7902708  | rs7908745  | rs79145148 | rs79206850 | rs79263055 | rs79316200 | rs7936928  |
| rs7896518  | rs79028154 | rs79088961 | rs79145239 | rs79206939 | rs7926354  | rs7931899  | rs7937     |
| rs7896519  | rs7903144  | rs79089478 | rs7914558  | rs7920721  | rs7926389  | rs793191   | rs7937127  |
| rs7896547  | rs7903146  | rs7909027  | rs79145982 | rs79207438 | rs79264696 | rs7931938  | rs79371986 |
| rs7896608  | rs79032435 | rs7909074  | rs79146658 | rs79208462 | rs79265434 | rs793202   | rs7937208  |
| rs7896783  | rs7903338  | rs79090772 | rs7914674  | rs79208875 | rs79266273 | rs7932091  | rs7937298  |
| rs7896811  | rs7903456  | rs7909223  | rs7914680  | rs79210963 | rs79266634 | rs79321945 | rs79373409 |
| rs78968605 | rs79034755 | rs7909322  | rs79147119 | rs79211428 | rs7926712  | rs79322592 | rs7937452  |
| rs7896910  | rs7903537  | rs790935   | rs7914842  | rs79211555 | rs7926906  | rs7932354  | rs7937459  |
| rs789709   | rs790356   | rs79094127 | rs79150293 | rs7921226  | rs7926971  | rs79324425 | rs7937477  |
| rs78971134 | rs79036082 | rs79094191 | rs79150294 | rs7921238  | rs7927044  | rs7932640  | rs79375912 |
| rs7897298  | rs79036893 | rs7909519  | rs79153732 | rs79212538 | rs7927176  | rs7932891  | rs7937682  |
| rs78973041 | rs79037040 | rs7909591  | rs7915414  | rs7921305  | rs7927191  | rs7932983  | rs7937689  |
| rs78973538 | rs7903847  | rs7909670  | rs7915425  | rs7921378  | rs7927208  | rs7933085  | rs7937758  |
| rs78973710 | rs7903921  | rs79097182 | rs7915429  | rs79214621 | rs79272390 | rs7933208  | rs7937840  |
| rs7897379  | rs79040733 | rs7909791  | rs7915430  | rs7921574  | rs79272926 | rs7933220  | rs7937910  |
| rs7897395  | rs79041579 | rs7909927  | rs7915475  | rs79216873 | rs79272944 | rs7933244  | rs7937915  |
| rs7897422  | rs7904321  | rs79101008 | rs79156681 | rs79216979 | rs7927466  | rs7933262  | rs7938033  |
| rs7897633  | rs7904519  | rs7910135  | rs79158536 | rs7921721  | rs7927515  | rs7933285  | rs7938117  |
| rs78976775 | rs79046494 | rs79101886 | rs79158673 | rs79219469 | rs79275904 | rs79333016 | rs79382056 |
| rs78977169 | rs7904655  | rs79101959 | rs791590   | rs79220007 | rs7927592  | rs79334166 | rs7938308  |
| rs78977588 | rs79046683 | rs7910217  | rs791595   | rs7922045  | rs7927682  | rs7933433  | rs79383275 |
| rs78980826 | rs79047930 | rs7910403  | rs791600   | rs7922049  | rs7927693  | rs79337446 | rs7938342  |
| rs7898462  | rs7904832  | rs7910414  | rs7916093  | rs79225222 | rs7927724  | rs7934094  | rs7938370  |
| rs7898528  | rs7904973  | rs79104438 | rs79163227 | rs79228062 | rs79278236 | rs79341334 | rs79383797 |
| rs78985461 | rs79050301 | rs79105258 | rs79163323 | rs7923176  | rs7927894  | rs79342110 | rs7938407  |
| rs789858   | rs7905192  | rs7910601  | rs7916385  | rs7923266  | rs7927974  | rs7934276  | rs79384925 |
| rs789862   | rs7905265  | rs79108221 | rs7916396  | rs7923367  | rs79279753 | rs79343853 | rs79385087 |
| rs78986840 | rs7905367  | rs7910927  | rs7916410  | rs79234094 | rs7927997  | rs7934386  | rs79386779 |
| rs7898685  | rs7905471  | rs7911117  | rs7916441  | rs7923544  | rs7928017  | rs7934481  | rs79387448 |
| rs78986976 | rs7905482  | rs7911193  | rs79165963 | rs7923609  | rs7928073  | rs793456   | rs7938782  |
| rs7898709  | rs7905553  | rs7911226  | rs7916672  | rs79236537 | rs7928419  | rs7934606  | rs7938812  |
| rs7898858  | rs79055896 | rs7911264  | rs7916697  | rs79236614 | rs79284724 | rs79346194 | rs7938885  |
| rs7899004  | rs79056043 | rs79112896 | rs7916821  | rs7923675  | rs7928523  | rs7934719  | rs79388987 |
| rs7899106  | rs790564   | rs79113395 | rs7916868  | rs79237498 | rs7928577  | rs79348723 | rs79389047 |
| rs7899260  | rs79058858 | rs7911500  | rs7916961  | rs79237520 | rs7928655  | rs7934935  | rs79390637 |
| rs7899270  | rs79060196 | rs79117505 | rs79170539 | rs79237700 | rs7928703  | rs79349366 | rs79391862 |
| rs7899503  | rs7906104  | rs79117855 | rs7917610  | rs79237970 | rs79287178 | rs79349575 | rs7939319  |
| rs7899547  | rs79061565 | rs7911816  | rs7917677  | rs7923837  | rs7928758  | rs79349787 | rs7939337  |
| rs7899628  | rs79062474 | rs7912035  | rs7917772  | rs7923866  | rs7928810  | rs7935166  | rs7939345  |
| rs78997619 | rs79062978 | rs79121242 | rs7917795  | rs7923888  | rs7928927  | rs7935375  | rs7939352  |

|            |            |            |            |             |             |             |            |
|------------|------------|------------|------------|-------------|-------------|-------------|------------|
| rs7939541  | rs7943936  | rs7949608  | rs79543    | rs79593277  | rs7964361   | rs79690602  | rs7972561  |
| rs79395932 | rs7943953  | rs79497057 | rs7954542  | rs7959452   | rs7964383   | rs7969076   | rs797267   |
| rs79396740 | rs7943988  | rs7949779  | rs7954567  | rs7959604   | rs7964492   | rs796915    | rs79728014 |
| rs7939778  | rs7944004  | rs7949802  | rs79545745 | rs7959663   | rs796469291 | rs79692389  | rs79730542 |
| rs7939912  | rs7944154  | rs7949917  | rs79545773 | rs7959830   | rs7964698   | rs79692989  | rs79730878 |
| rs79399769 | rs79441543 | rs7950019  | rs7954584  | rs7959831   | rs7964859   | rs7969300   | rs79731025 |
| rs7940022  | rs7944299  | rs795009   | rs7954638  | rs79598313  | rs7964899   | rs79693059  | rs7973103  |
| rs7940105  | rs7944541  | rs79501286 | rs7954659  | rs79598985  | rs796495740 | rs796945    | rs79731748 |
| rs7940127  | rs7944584  | rs7950149  | rs7954697  | rs7959983   | rs7965154   | rs7969489   | rs79732015 |
| rs794016   | rs7944735  | rs7950166  | rs79548498 | rs79600142  | rs79651842  | rs7969505   | rs7973253  |
| rs7940165  | rs7944782  | rs79502    | rs7954946  | rs79600176  | rs79652218  | rs796953522 | rs7973260  |
| rs7940228  | rs7945067  | rs7950273  | rs79550344 | rs796003    | rs7965253   | rs7969559   | rs79732694 |
| rs79402305 | rs7945319  | rs79502742 | rs7955128  | rs796004    | rs796526078 | rs79695640  | rs79733107 |
| rs7940310  | rs79455288 | rs79503123 | rs79551394 | rs796007    | rs7965392   | rs7969719   | rs79733879 |
| rs79403652 | rs7945705  | rs7950331  | rs7955221  | rs79600951  | rs7965424   | rs7969761   | rs797342   |
| rs79403677 | rs7945718  | rs79505281 | rs7955258  | rs796056    | rs7965453   | rs7969894   | rs797343   |
| rs7940441  | rs7946     | rs79506257 | rs7955374  | rs79606218  | rs7965584   | rs796991470 | rs797344   |
| rs7940646  | rs79460537 | rs7950696  | rs7955516  | rs79606893  | rs79658307  | rs79699670  | rs7973618  |
| rs79406658 | rs7946057  | rs7950726  | rs7955525  | rs7961023   | rs7965852   | rs79700672  | rs7973683  |
| rs79407053 | rs79461387 | rs7950748  | rs7955635  | rs7961185   | rs7966054   | rs79701229  | rs7973719  |
| rs79407615 | rs794614   | rs7950811  | rs79556505 | rs7961248   | rs7966177   | rs7970129   | rs7973812  |
| rs7940807  | rs79461840 | rs79509430 | rs7955734  | rs796130745 | rs7966201   | rs7970181   | rs79742625 |
| rs7940841  | rs7946641  | rs7951153  | rs7955752  | rs79613098  | rs796620802 | rs79702879  | rs7974266  |
| rs7940866  | rs7946992  | rs79512144 | rs7955819  | rs7961581   | rs7966257   | rs7970350   | rs79742895 |
| rs79409705 | rs79470265 | rs7951297  | rs7955865  | rs79616633  | rs7966318   | rs797042243 | rs7974321  |
| rs7941030  | rs7947143  | rs7951348  | rs7955901  | rs79616692  | rs796631903 | rs7970462   | rs7974348  |
| rs79411018 | rs79471827 | rs7951365  | rs7955910  | rs7961712   | rs796632525 | rs79704906  | rs7974375  |
| rs79412431 | rs79472072 | rs79518236 | rs79560051 | rs796177770 | rs7966334   | rs79705207  | rs7974437  |
| rs79412885 | rs7947391  | rs7951870  | rs7956131  | rs79618076  | rs7966357   | rs7970544   | rs7974517  |
| rs7941496  | rs7947419  | rs7951933  | rs7956208  | rs7961894   | rs796647867 | rs7970617   | rs79748197 |
| rs7941510  | rs7947524  | rs7952043  | rs79562083 | rs7961920   | rs796650675 | rs7970682   | rs7974833  |
| rs7941765  | rs7947529  | rs79520962 | rs7956306  | rs7961979   | rs7966590   | rs7970687   | rs7974852  |
| rs7941785  | rs7947553  | rs7952102  | rs79564737 | rs7962050   | rs79666294  | rs7970695   | rs797486   |
| rs7941828  | rs7947605  | rs7952106  | rs79564755 | rs7962128   | rs7966651   | rs79709502  | rs797487   |
| rs79418323 | rs7947631  | rs7952220  | rs79565040 | rs7962222   | rs796667047 | rs7970953   | rs7974900  |
| rs7941845  | rs79476395 | rs79522206 | rs7956514  | rs79623590  | rs79668541  | rs7971      | rs7975017  |
| rs7941947  | rs79476680 | rs7952251  | rs79565446 | rs79624003  | rs7966895   | rs7971039   | rs797512   |
| rs7941964  | rs7947761  | rs795230   | rs7956547  | rs79624091  | rs7966951   | rs79710863  | rs79751662 |
| rs7942037  | rs79478560 | rs79523138 | rs7956634  | rs796246678 | rs79671623  | rs7971133   | rs7975187  |
| rs7942078  | rs7947874  | rs7952320  | rs7956653  | rs7962469   | rs796725    | rs79712192  | rs79754744 |
| rs7942122  | rs7947929  | rs79523756 | rs79571853 | rs7962629   | rs79674254  | rs7971334   | rs79755028 |
| rs79421535 | rs794794   | rs7952436  | rs7957197  | rs7962636   | rs7967550   | rs79713586  | rs79755370 |
| rs79423161 | rs7947951  | rs79524815 | rs7957375  | rs796265209 | rs79675564  | rs79714767  | rs79755767 |
| rs7942368  | rs79480871 | rs7952509  | rs79574529 | rs79628306  | rs796772920 | rs7971536   | rs79755663 |
| rs7942486  | rs7948120  | rs7952686  | rs79575541 | rs796292934 | rs7967829   | rs79716074  | rs79755687 |
| rs79425047 | rs7948458  | rs79527984 | rs7957589  | rs7962971   | rs796783884 | rs7971608   | rs7975763  |
| rs79429038 | rs7948471  | rs79528632 | rs79577858 | rs7963151   | rs79680080  | rs79716587  | rs7975788  |
| rs79429216 | rs79485449 | rs795288   | rs7957882  | rs79631993  | rs79680096  | rs7971674   | rs7975791  |
| rs7943055  | rs7948661  | rs7952935  | rs79579959 | rs7963344   | rs796820687 | rs79716947  | rs7976059  |
| rs7943117  | rs79487293 | rs7953139  | rs79581935 | rs79634051  | rs7968251   | rs79717793  | rs79760705 |
| rs7943191  | rs7948789  | rs7953249  | rs79582082 | rs79634326  | rs7968283   | rs79717953  | rs79761396 |
| rs7943203  | rs79488099 | rs7953257  | rs7958241  | rs79635379  | rs796831889 | rs7971845   | rs7976167  |
| rs79432630 | rs7948848  | rs7953280  | rs79582714 | rs796362736 | rs7968390   | rs79719017  | rs79761689 |
| rs794358   | rs79488654 | rs7953327  | rs7958316  | rs796364    | rs7968403   | rs797192    | rs7976269  |
| rs7943607  | rs7948924  | rs7953330  | rs7958371  | rs7963783   | rs7968419   | rs7971939   | rs7976502  |
| rs7943634  | rs7948975  | rs7953528  | rs79584798 | rs796379038 | rs7968440   | rs79719909  | rs7976530  |
| rs79436609 | rs794899   | rs7953553  | rs79585412 | rs7963801   | rs796856741 | rs7972001   | rs79767424 |
| rs7943688  | rs7949048  | rs7953558  | rs7958678  | rs7963844   | rs7968679   | rs7972091   | rs7976757  |
| rs7943699  | rs794905   | rs7953704  | rs7958679  | rs79638618  | rs7968682   | rs79721202  | rs79767800 |
| rs7943712  | rs79491673 | rs79537552 | rs7958704  | rs796386240 | rs79686965  | rs7972177   | rs797680   |
| rs7943721  | rs79492354 | rs79538982 | rs79588679 | rs79638902  | rs7968703   | rs7972246   | rs79768058 |
| rs7943728  | rs7949333  | rs7953905  | rs79589031 | rs7964003   | rs7968719   | rs79722469  | rs79768173 |
| rs794375   | rs7949336  | rs7953929  | rs79589376 | rs79640067  | rs79687284  | rs79724016  | rs7976870  |
| rs79437808 | rs79493866 | rs7954112  | rs7958945  | rs7964067   | rs796878431 | rs7972416   | rs79771286 |
| rs7943847  | rs79495055 | rs7954120  | rs79589801 | rs796415138 | rs7968808   | rs79724292  | rs7977237  |
| rs7943887  | rs79495154 | rs7954144  | rs7959016  | rs796422700 | rs7968902   | rs7972528   | rs7977247  |
| rs79439080 | rs7949566  | rs7954238  | rs79590991 | rs7964241   | rs79690157  | rs79725587  | rs7977311  |

|            |            |            |            |            |            |            |            |
|------------|------------|------------|------------|------------|------------|------------|------------|
| rs7977389  | rs79839061 | rs7988232  | rs79936776 | rs80002621 | rs80064395 | rs8009933  | rs8014725  |
| rs7977418  | rs79841658 | rs798829   | rs79937071 | rs80004662 | rs80065107 | rs8009934  | rs80147536 |
| rs7977437  | rs7984177  | rs7988627  | rs7993710  | rs80005209 | rs8006700  | rs8009993  | rs8014907  |
| rs7977614  | rs79843017 | rs79889094 | rs7993752  | rs8000682  | rs8006719  | rs801011   | rs8015022  |
| rs7977720  | rs7984442  | rs798893   | rs7993934  | rs8000690  | rs80067372 | rs80101936 | rs80150794 |
| rs79777526 | rs79846291 | rs79889784 | rs79940707 | rs8000803  | rs80067794 | rs8010382  | rs8015119  |
| rs7977812  | rs79847479 | rs798898   | rs7994229  | rs8000920  | rs80068415 | rs80103986 | rs8015152  |
| rs7978070  | rs798489   | rs79890196 | rs79943003 | rs8000933  | rs8006875  | rs8010674  | rs8015210  |
| rs79780963 | rs79849088 | rs7989041  | rs79943102 | rs80010377 | rs8006884  | rs801076   | rs801525   |
| rs79781504 | rs798491   | rs798907   | rs799443   | rs80012730 | rs8006994  | rs80109907 | rs8015400  |
| rs79782488 | rs798495   | rs7989098  | rs799444   | rs80014155 | rs8007087  | rs8011097  | rs8015423  |
| rs7978301  | rs798497   | rs798914   | rs79944483 | rs80014372 | rs80071768 | rs801114   | rs8015478  |
| rs7978353  | rs798498   | rs79891622 | rs799449   | rs8001600  | rs80073370 | rs8011181  | rs80155616 |
| rs79784189 | rs798502   | rs7989250  | rs7994566  | rs8001611  | rs8007356  | rs80111889 | rs8015760  |
| rs79784917 | rs798503   | rs7989336  | rs79949326 | rs8001641  | rs80073729 | rs80112473 | rs8015861  |
| rs79785281 | rs79850428 | rs79893561 | rs799498   | rs8001781  | rs8007643  | rs8011288  | rs80158983 |
| rs79785879 | rs798510   | rs798943   | rs7995015  | rs8001810  | rs8007661  | rs8011459  | rs8016028  |
| rs79785970 | rs798511   | rs79894332 | rs79950627 | rs8001925  | rs80076900 | rs8011566  | rs8016075  |
| rs7978610  | rs7985179  | rs79894581 | rs7995215  | rs80019595 | rs80077929 | rs80115810 | rs8016306  |
| rs7978685  | rs7985205  | rs79895267 | rs79953286 | rs8002014  | rs80078371 | rs8011585  | rs8016504  |
| rs7978702  | rs798526   | rs7989654  | rs79953563 | rs80020578 | rs80078501 | rs80116564 | rs80167373 |
| rs79789360 | rs798528   | rs79896703 | rs7995591  | rs8002127  | rs80078546 | rs80117551 | rs8016859  |
| rs7979284  | rs798533   | rs79897941 | rs7995617  | rs8002150  | rs8007933  | rs801193   | rs8016947  |
| rs79793188 | rs7985364  | rs7989823  | rs7995668  | rs8002180  | rs80079800 | rs8012     | rs80170476 |
| rs7979353  | rs7985381  | rs7989827  | rs79957430 | rs80024005 | rs80080062 | rs80120242 | rs8017057  |
| rs7979418  | rs798544   | rs79898419 | rs7996004  | rs8002412  | rs8008020  | rs8012145  | rs80170948 |
| rs7979430  | rs7985441  | rs79898470 | rs7996207  | rs8002479  | rs8008068  | rs8012156  | rs80171383 |
| rs7979473  | rs798545   | rs79898473 | rs7996228  | rs8002514  | rs8008070  | rs8012255  | rs8017161  |
| rs7979478  | rs798548   | rs79900185 | rs79964014 | rs80026423 | rs80082277 | rs8012377  | rs8017172  |
| rs79795228 | rs798549   | rs79900979 | rs7996555  | rs8002688  | rs80082351 | rs80124906 | rs8017228  |
| rs7979673  | rs7985509  | rs7990098  | rs799661   | rs8002731  | rs80082536 | rs8012503  | rs8017304  |
| rs79797223 | rs798551   | rs79901336 | rs79966207 | rs80028338 | rs8008270  | rs8012614  | rs801732   |
| rs7979755  | rs79855325 | rs7990306  | rs7996639  | rs8002850  | rs80083067 | rs8012643  | rs801733   |
| rs79797842 | rs798554   | rs79904209 | rs79966604 | rs80028505 | rs80083564 | rs80126506 | rs8017377  |
| rs79798166 | rs798555   | rs79904641 | rs79967707 | rs800292   | rs8008382  | rs8012947  | rs801738   |
| rs79798752 | rs798557   | rs79906221 | rs7997034  | rs8003014  | rs8008388  | rs8013055  | rs801742   |
| rs79802086 | rs79855925 | rs7991062  | rs79972157 | rs80030895 | rs8008502  | rs80130819 | rs80174646 |
| rs7980504  | rs798563   | rs7991229  | rs7997464  | rs80032242 | rs80085026 | rs8013143  | rs80176849 |
| rs79806428 | rs798565   | rs7991314  | rs7997628  | rs80033912 | rs8008540  | rs80132799 | rs8017808  |
| rs7980687  | rs79857651 | rs799157   | rs7997640  | rs80035064 | rs8008583  | rs8013382  | rs8017944  |
| rs7980759  | rs7986094  | rs7991576  | rs79977579 | rs8003602  | rs80086254 | rs80133860 | rs80182532 |
| rs7980799  | rs7986114  | rs799158   | rs799791   | rs80037907 | rs800870   | rs80134320 | rs8018278  |
| rs7980991  | rs7986115  | rs799160   | rs7998050  | rs8003813  | rs8008748  | rs801350   | rs8018308  |
| rs7981274  | rs7986407  | rs799165   | rs79980676 | rs80040504 | rs8008772  | rs80135947 | rs8018379  |
| rs7981280  | rs79864120 | rs7991679  | rs7998202  | rs80040580 | rs800882   | rs80136777 | rs8018493  |
| rs79814575 | rs79870097 | rs79917357 | rs79983121 | rs8004096  | rs800888   | rs801378   | rs8018512  |
| rs79815064 | rs79870266 | rs79920061 | rs7998317  | rs8004237  | rs8008898  | rs80138475 | rs80186738 |
| rs7981577  | rs79870814 | rs79920190 | rs7998440  | rs8004294  | rs800890   | rs80138699 | rs8018720  |
| rs7981781  | rs7987170  | rs7992229  | rs79984435 | rs8004430  | rs8008961  | rs8013872  | rs8018808  |
| rs7981863  | rs7987173  | rs7992307  | rs7998537  | rs8004835  | rs80090179 | rs80139154 | rs80188179 |
| rs7981875  | rs798726   | rs7992314  | rs7998826  | rs8005092  | rs8009025  | rs8013933  | rs8018823  |
| rs79821347 | rs79873275 | rs79924303 | rs79989256 | rs8005100  | rs800911   | rs8013954  | rs80189144 |
| rs7982404  | rs7987467  | rs79925071 | rs79989390 | rs800512   | rs8009147  | rs8014067  | rs80189576 |
| rs7982447  | rs79874727 | rs79927049 | rs79990258 | rs8005161  | rs8009299  | rs8014069  | rs8018967  |
| rs79826452 | rs798748   | rs7992832  | rs7999125  | rs8005172  | rs80093081 | rs8014133  | rs8018968  |
| rs7982677  | rs79874964 | rs7992913  | rs7999314  | rs80052686 | rs8009329  | rs801417   | rs80190634 |
| rs79827531 | rs7987593  | rs7992992  | rs79994730 | rs8005334  | rs8009336  | rs8014181  | rs80193249 |
| rs7982779  | rs79879599 | rs7993004  | rs79994966 | rs800534   | rs8009347  | rs8014182  | rs80193476 |
| rs7982828  | rs7987651  | rs7993153  | rs79997166 | rs8005362  | rs80093687 | rs8014194  | rs8019389  |
| rs79828839 | rs798766   | rs79931565 | rs7999758  | rs80054135 | rs8009444  | rs80142631 | rs8019453  |
| rs79830845 | rs7987740  | rs7993238  | rs799979   | rs80054178 | rs80094684 | rs80142782 | rs80194822 |
| rs79832049 | rs79879002 | rs79932649 | rs79999320 | rs80054503 | rs80094991 | rs8014289  | rs8019495  |
| rs7983337  | rs79879286 | rs7993498  | rs8        | rs80054548 | rs80095739 | rs801429   | rs80195870 |
| rs79834152 | rs7987944  | rs79935131 | rs8000018  | rs8005677  | rs8009633  | rs80143279 | rs8019612  |
| rs7983462  | rs79879554 | rs7993537  | rs8000101  | rs80060485 | rs8009743  | rs8014671  | rs80196932 |
| rs7983505  | rs79881201 | rs7993628  | rs80001695 | rs80063346 | rs80097534 | rs80147136 | rs8019721  |
| rs798374   | rs7988208  | rs79936652 | rs8000189  | rs8006385  | rs8009930  | rs8014716  | rs8019890  |

|            |            |            |            |           |             |           |           |
|------------|------------|------------|------------|-----------|-------------|-----------|-----------|
| rs8019932  | rs8024628  | rs8028130  | rs8034057  | rs8040040 | rs8045740   | rs805297  | rs8061082 |
| rs80200046 | rs8024690  | rs8028182  | rs80341670 | rs8040109 | rs8045779   | rs8053004 | rs8061121 |
| rs8020034  | rs8024806  | rs80282103 | rs8034191  | rs8040232 | rs8045833   | rs805303  | rs8061272 |
| rs8020436  | rs8024893  | rs8028254  | rs8034216  | rs8040585 | rs8045843   | rs8053277 | rs8061370 |
| rs8020575  | rs8025068  | rs8028313  | rs80343429 | rs8040868 | rs8045886   | rs80533   | rs8061521 |
| rs80206917 | rs8025191  | rs8028409  | rs80344830 | rs8041113 | rs8046011   | rs8053333 | rs8061528 |
| rs8020739  | rs8025231  | rs8028620  | rs8034595  | rs8041222 | rs8046072   | rs8053350 | rs8061569 |
| rs80207740 | rs80253120 | rs80287694 | rs80346118 | rs8041227 | rs8046148   | rs805343  | rs8061590 |
| rs8020912  | rs8025493  | rs80289781 | rs80347400 | rs8041380 | rs8046217   | rs8053536 | rs806166  |
| rs80209296 | rs8025505  | rs8029034  | rs8034802  | rs8041447 | rs8046299   | rs8053548 | rs8061677 |
| rs8020969  | rs8025516  | rs8029315  | rs8034838  | rs8041548 | rs8046391   | rs8053655 | rs806188  |
| rs8020977  | rs80255322 | rs80293200 | rs8034885  | rs8041815 | rs8046476   | rs8054079 | rs806215  |
| rs80215473 | rs8025614  | rs80293268 | rs8035173  | rs804193  | rs8046545   | rs8054082 | rs806219  |
| rs80215559 | rs8025619  | rs8029440  | rs80351950 | rs8042134 | rs804667    | rs8054113 | rs8062311 |
| rs80216136 | rs8025626  | rs8029469  | rs80352135 | rs8042174 | rs8046696   | rs8054155 | rs8062405 |
| rs8021741  | rs8025628  | rs8029754  | rs803522   | rs8042238 | rs8046697   | rs8054198 | rs8062446 |
| rs80217917 | rs80256351 | rs8030097  | rs80352736 | rs8042260 | rs8046707   | rs8054299 | rs8062638 |
| rs80218807 | rs8025708  | rs8030131  | rs8035323  | rs8042271 | rs8046856   | rs8054322 | rs8062719 |
| rs80219613 | rs8025774  | rs80302414 | rs8035460  | rs8042361 | rs8046862   | rs8054554 | rs806293  |
| rs8022179  | rs80257854 | rs8030277  | rs8035549  | rs8042374 | rs8046884   | rs8054556 | rs8062941 |
| rs8022180  | rs80257887 | rs80302977 | rs8035677  | rs8042456 | rs8047112   | rs8054578 | rs8063057 |
| rs8022206  | rs8025790  | rs8030357  | rs8035855  | rs8042462 | rs8047194   | rs8054651 | rs8063103 |
| rs80222069 | rs80257979 | rs8030379  | rs8035886  | rs8042543 | rs8047349   | rs8054908 | rs8063159 |
| rs8022225  | rs8025889  | rs8030456  | rs8036030  | rs8042545 | rs8047421   | rs8055167 | rs8063160 |
| rs8022288  | rs8025932  | rs8030487  | rs8036171  | rs8042558 | rs8047465   | rs8055187 | rs806319  |
| rs80223410 | rs8025964  | rs8030559  | rs803619   | rs8042597 | rs8047501   | rs8055190 | rs806321  |
| rs80223426 | rs8026121  | rs80305714 | rs8036549  | rs804263  | rs8047587   | rs8055219 | rs8063603 |
| rs8022455  | rs80261926 | rs8030605  | rs8036748  | rs804267  | rs8047664   | rs8055724 | rs8063657 |
| rs8022504  | rs8026198  | rs80306194 | rs8036817  | rs8042680 | rs8047834   | rs805583  | rs8063706 |
| rs8022510  | rs80262246 | rs8030672  | rs8037016  | rs8042779 | rs8048576   | rs8055912 | rs8063761 |
| rs8022526  | rs80262450 | rs8030704  | rs8037137  | rs804279  | rs8048855   | rs8055982 | rs8064088 |
| rs80226387 | rs80262609 | rs8030753  | rs8037213  | rs80428   | rs8049040   | rs8056206 | rs8064111 |
| rs8022678  | rs8026431  | rs80308281 | rs803733   | rs804280  | rs8049080   | rs8056260 | rs8064126 |
| rs80226907 | rs80264330 | rs80309268 | rs803734   | rs804281  | rs8049367   | rs8056338 | rs8064299 |
| rs80227144 | rs80264589 | rs80309567 | rs8037355  | rs8042849 | rs8049394   | rs8056420 | rs8064426 |
| rs8022764  | rs8026614  | rs80311040 | rs8037502  | rs8042861 | rs8049439   | rs8056750 | rs8064454 |
| rs8023057  | rs8026676  | rs8031133  | rs803765   | rs8043009 | rs8049607   | rs8056814 | rs8064529 |
| rs8023401  | rs8026714  | rs8031576  | rs8037775  | rs8043060 | rs8049607-T | rs8056890 | rs8064679 |
| rs80234081 | rs8026743  | rs8031650  | rs8037837  | rs8043085 | rs8050136   | rs8056893 | rs8064739 |
| rs80234489 | rs8026803  | rs8031704  | rs803786   | rs8043227 | rs8050237   | rs8056952 | rs8064871 |
| rs8023466  | rs80268500 | rs80318442 | rs8037894  | rs8043253 | rs8050260   | rs8056960 | rs8065165 |
| rs8023503  | rs8026898  | rs80319144 | rs8037902  | rs8043701 | rs8050478   | rs8057203 | rs8065231 |
| rs80235628 | rs8027011  | rs8031948  | rs8038032  | rs8043757 | rs8050500   | rs805737  | rs8065292 |
| rs8023580  | rs80270335 | rs8032158  | rs803804   | rs8043821 | rs8050598   | rs8057456 | rs8065311 |
| rs8023638  | rs8027064  | rs8032315  | rs8038108  | rs8044054 | rs8050731   | rs805757  | rs8065337 |
| rs8023655  | rs80271258 | rs80323638 | rs8038207  | rs8044082 | rs8050745   | rs80576   | rs8065777 |
| rs80236739 | rs8027181  | rs8032416  | rs803821   | rs8044363 | rs8050894   | rs8057620 | rs8066044 |
| rs80236973 | rs80271829 | rs8032549  | rs8038326  | rs8044476 | rs8050896   | rs805768  | rs8066384 |
| rs8023715  | rs80272044 | rs8032553  | rs8038454  | rs8044477 | rs8050940   | rs805769  | rs8066596 |
| rs8023769  | rs802730   | rs8032565  | rs8038464  | rs8044524 | rs8051004   | rs805770  | rs8066620 |
| rs8023793  | rs802731   | rs8032675  | rs8038465  | rs8044535 | rs8051038   | rs8057808 | rs8066625 |
| rs8024     | rs802734   | rs8032680  | rs8038522  | rs8044588 | rs8051149   | rs8058137 | rs8066695 |
| rs8024033  | rs80274300 | rs8032684  | rs8038574  | rs8044595 | rs8051363   | rs8058227 | rs8066685 |
| rs8024067  | rs8027457  | rs80326876 | rs8038591  | rs8044657 | rs8051431   | rs8058881 | rs8066941 |
| rs8024137  | rs80275162 | rs8032760  | rs8038760  | rs8044995 | rs8051517   | rs8058904 | rs8066978 |
| rs8024244  | rs8027524  | rs8032939  | rs803903   | rs8045027 | rs8052370   | rs8059153 | rs8066985 |
| rs802425   | rs8027685  | rs8033165  | rs8039126  | rs8045041 | rs8052502   | rs8059189 | rs8067056 |
| rs80242667 | rs80276949 | rs80332023 | rs8039168  | rs8045063 | rs8052523   | rs8059619 | rs8067124 |
| rs8024276  | rs8027714  | rs8033380  | rs803923   | rs8045064 | rs8052560   | rs8059962 | rs8067165 |
| rs8024294  | rs8027730  | rs8033381  | rs8039305  | rs8045100 | rs8052566   | rs8060025 | rs8067186 |
| rs80243702 | rs8027760  | rs8033510  | rs8039398  | rs8045174 | rs805263    | rs8060157 | rs8067342 |
| rs8024386  | rs8027781  | rs80335285 | rs8039399  | rs8045421 | rs8052655   | rs8060576 | rs8067354 |
| rs80244186 | rs80277818 | rs8033552  | rs8039418  | rs804553  | rs805273    | rs8060596 | rs8067360 |
| rs8024453  | rs80278614 | rs8033609  | rs8039449  | rs8045544 | rs8052826   | rs8060686 | rs8067378 |
| rs802456   | rs802791   | rs8033670  | rs8039459  | rs8045560 | rs8052831   | rs8060857 | rs8067440 |
| rs80245809 | rs80279257 | rs803379   | rs8039637  | rs8045589 | rs8052889   | rs8060950 | rs8067462 |
| rs80245932 | rs80279459 | rs80338266 | rs8039718  | rs8045614 | rs805293    | rs8061043 | rs8067476 |

|           |           |           |           |           |           |           |           |
|-----------|-----------|-----------|-----------|-----------|-----------|-----------|-----------|
| rs8067511 | rs8073599 | rs8079702 | rs8088712 | rs8099917 | rs8106042 | rs8113925 | rs813308  |
| rs8067763 | rs8073626 | rs8079781 | rs8088781 | rs8100057 | rs8106212 | rs8114375 | rs8133101 |
| rs806794  | rs8073894 | rs8079951 | rs8088824 | rs8100197 | rs8106453 | rs811458  | rs8133436 |
| rs8067974 | rs8073913 | rs8080031 | rs8088885 | rs8100223 | rs8106503 | rs8114643 | rs8133843 |
| rs8068017 | rs8073937 | rs8080061 | rs8088980 | rs8100241 | rs8106542 | rs8114671 | rs8133974 |
| rs8068122 | rs8074026 | rs8080078 | rs8089099 | rs8100279 | rs8106657 | rs8114815 | rs813412  |
| rs806816  | rs8074279 | rs8080122 | rs808919  | rs8100454 | rs8106700 | rs8115156 | rs8134638 |
| rs8068234 | rs8074306 | rs8080123 | rs8089364 | rs810048  | rs8106704 | rs8115555 | rs8134775 |
| rs8068260 | rs8074318 | rs8080307 | rs8089474 | rs8100480 | rs8106745 | rs8116154 | rs8135417 |
| rs8068318 | rs8074332 | rs8080378 | rs8089514 | rs8100855 | rs810681  | rs811689  | rs8135665 |
| rs806845  | rs8074363 | rs8080418 | rs808966  | rs8100891 | rs8106871 | rs8117259 | rs8136485 |
| rs8068544 | rs8074454 | rs8080583 | rs8089834 | rs8101064 | rs8106922 | rs811745  | rs8137128 |
| rs8068589 | rs8074498 | rs8080657 | rs8089865 | rs8101149 | rs8107139 | rs8118008 | rs8137636 |
| rs8068804 | rs8074638 | rs8080772 | rs808994  | rs8101185 | rs8107194 | rs8118150 | rs8137950 |
| rs8068844 | rs8074740 | rs8080784 | rs8089996 | rs8101286 | rs8107527 | rs8118315 | rs8138197 |
| rs8068952 | rs8074744 | rs8080944 | rs8090011 | rs8101375 | rs8107548 | rs8118848 | rs8138460 |
| rs8069036 | rs807478  | rs8081039 | rs8090126 | rs8101667 | rs8107967 | rs8120315 | rs8138473 |
| rs8069068 | rs8074783 | rs8081187 | rs8090312 | rs8101673 | rs8107974 | rs81205   | rs8138697 |
| rs8069176 | rs807479  | rs8081264 | rs8090527 | rs8101801 | rs8107998 | rs8120559 | rs8138950 |
| rs8069437 | rs8075019 | rs8081395 | rs8090945 | rs8101881 | rs8108147 | rs8120730 | rs813913  |
| rs8069451 | rs8075273 | rs8081535 | rs8091068 | rs8101895 | rs8108269 | rs812097  | rs813915  |
| rs806973  | rs8075280 | rs8081548 | rs8091117 | rs8102    | rs8108461 | rs8121126 | rs8139521 |
| rs8069739 | rs8075598 | rs8081627 | rs8091180 | rs8102137 | rs8108474 | rs8121146 | rs8139674 |
| rs8069947 | rs8075811 | rs8081669 | rs8091632 | rs8102266 | rs8108623 | rs8121509 | rs8139770 |
| rs8070128 | rs807601  | rs8081692 | rs809205  | rs8102280 | rs8108632 | rs8121940 | rs8139773 |
| rs8070135 | rs807603  | rs808187  | rs8092503 | rs8102380 | rs8108659 | rs8121964 | rs8139817 |
| rs8070260 | rs8076183 | rs8082036 | rs8093234 | rs8102476 | rs8108722 | rs8122094 | rs8139952 |
| rs8070290 | rs807624  | rs8082191 | rs8093407 | rs8102492 | rs8108787 | rs8122234 | rs8139974 |
| rs8070345 | rs8076249 | rs8082345 | rs8093507 | rs8102493 | rs8108822 | rs8122757 | rs8140448 |
| rs8070356 | rs8076404 | rs8082452 | rs8093601 | rs8102502 | rs8108862 | rs8122855 | rs8141433 |
| rs807037  | rs8076457 | rs8082590 | rs8093763 | rs8102624 | rs8109267 | rs8123919 | rs8141529 |
| rs8070624 | rs8076546 | rs8082605 | rs8094014 | rs8102683 | rs8109288 | rs8124080 | rs8141699 |
| rs807067  | rs807669  | rs8082621 | rs8094095 | rs8102732 | rs8109314 | rs8124182 | rs8141715 |
| rs807069  | rs8076703 | rs8082812 | rs8094261 | rs8102851 | rs8109496 | rs812426  | rs8141797 |
| rs8070692 | rs8076739 | rs8082946 | rs8094630 | rs8102873 | rs8109532 | rs8124661 | rs8142064 |
| rs8070723 | rs8076845 | rs8083511 | rs809479  | rs8102876 | rs8109848 | rs8124695 | rs8142452 |
| rs8070734 | rs8077015 | rs8083764 | rs8094865 | rs8102879 | rs8109873 | rs812481  | rs8142788 |
| rs8070737 | rs8077038 | rs8083786 | rs8095040 | rs8102900 | rs8110061 | rs812487  | rs814295  |
| rs8070740 | rs8077048 | rs8083850 | rs8095142 | rs8102936 | rs811054  | rs8124896 | rs8143037 |
| rs8070753 | rs8077127 | rs8084058 | rs8095374 | rs8103017 | rs8110787 | rs812490  | rs814573  |
| rs8071043 | rs8077172 | rs8084192 | rs8095764 | rs8103039 | rs8110814 | rs8125525 | rs814698  |
| rs8071086 | rs8077245 | rs8084255 | rs8095770 | rs8103262 | rs8111    | rs8125560 | rs815163  |
| rs8071207 | rs8077276 | rs8084280 | rs8095921 | rs8103278 | rs8111074 | rs812583  | rs815540  |
| rs8071235 | rs8077316 | rs8084351 | rs8096225 | rs8103309 | rs8111093 | rs8125909 | rs815577  |
| rs8071332 | rs807734  | rs8084619 | rs8096254 | rs8103660 | rs8111296 | rs8126001 | rs815610  |
| rs8071420 | rs8077456 | rs808471  | rs8096327 | rs8103728 | rs8111359 | rs8126207 | rs815710  |
| rs8071429 | rs8077619 | rs8085287 | rs8096445 | rs8103741 | rs811142  | rs8126516 | rs815715  |
| rs8071462 | rs8077636 | rs8085433 | rs8096564 | rs8103761 | rs8111500 | rs8127011 | rs815753  |
| rs8071558 | rs8077859 | rs8085664 | rs8096658 | rs8103940 | rs8111582 | rs8127283 | rs816329  |
| rs8071709 | rs8077889 | rs8086068 | rs8097041 | rs8103941 | rs8111708 | rs8127297 | rs816366  |
| rs8071756 | rs8077906 | rs8086340 | rs8097125 | rs8103974 | rs8111715 | rs812738  | rs816367  |
| rs8071778 | rs8077967 | rs8086351 | rs8097498 | rs8103992 | rs8111762 | rs8127691 | rs816396  |
| rs8071798 | rs8078112 | rs8086404 | rs8097544 | rs8104162 | rs8111874 | rs812814  | rs816411  |
| rs8071884 | rs8078296 | rs8087073 | rs8097672 | rs8104223 | rs8112211 | rs8128234 | rs81663   |
| rs8072058 | rs8078436 | rs8087238 | rs8097764 | rs8104447 | rs8112351 | rs8129030 | rs816828  |
| rs8072180 | rs8078452 | rs8087252 | rs8098244 | rs8104519 | rs8112411 | rs8129054 | rs816850  |
| rs8072266 | rs8078513 | rs8087293 | rs8098316 | rs8104559 | rs8112710 | rs812925  | rs816888  |
| rs8072297 | rs8078668 | rs8087619 | rs8098380 | rs8104600 | rs8112818 | rs812936  | rs816943  |
| rs8072449 | rs8078686 | rs8087694 | rs8098454 | rs8104651 | rs8112975 | rs812957  | rs8170    |
| rs8072451 | rs8078723 | rs8087795 | rs8098694 | rs8104679 | rs8112983 | rs8130074 | rs817223  |
| rs8072532 | rs807897  | rs8087799 | rs809871  | rs8104909 | rs8113091 | rs813017  | rs817300  |
| rs8072548 | rs8079062 | rs808791  | rs8099014 | rs8104911 | rs8113212 | rs8130408 | rs817329  |
| rs8073060 | rs8079215 | rs8087969 | rs8099145 | rs810496  | rs8113274 | rs8131458 | rs8175746 |
| rs8073120 | rs8079266 | rs8088001 | rs8099160 | rs8105300 | rs8113404 | rs8131693 | rs817579  |
| rs8073217 | rs8079418 | rs8088123 | rs8099412 | rs8105422 | rs8113613 | rs8132491 | rs8176059 |
| rs8073510 | rs8079537 | rs8088297 | rs809942  | rs8105753 | rs8113682 | rs8132680 | rs8176071 |
| rs8073551 | rs8079549 | rs8088319 | rs809955  | rs8105767 | rs811372  | rs8132840 | rs8176166 |

|           |           |          |           |          |          |          |             |
|-----------|-----------|----------|-----------|----------|----------|----------|-------------|
| rs8176229 | rs8181878 | rs823080 | rs833058  | rs840464 | rs849142 | rs855569 | rs8642      |
| rs8176396 | rs8181889 | rs823099 | rs833061  | rs840585 | rs849298 | rs855614 | rs864265    |
| rs8176526 | rs8181996 | rs823114 | rs833070  | rs840616 | rs849327 | rs855679 | rs864354    |
| rs8176547 | rs818215  | rs823118 | rs833083  | rs841189 | rs85     | rs855719 | rs864430    |
| rs8176636 | rs818219  | rs823123 | rs833268  | rs841194 | rs850294 | rs855788 | rs864537    |
| rs8176643 | rs818225  | rs823143 | rs833270  | rs841573 | rs850610 | rs855791 | rs864643    |
| rs8176644 | rs8182252 | rs823247 | rs833509  | rs84178  | rs850637 | rs855913 | rs864745    |
| rs8176645 | rs8182271 | rs824207 | rs833653  | rs842406 | rs850734 | rs856404 | rs864899    |
| rs8176662 | rs8182491 | rs825453 | rs8337    | rs842440 | rs850736 | rs856534 | rs865031    |
| rs8176671 | rs818415  | rs825458 | rs833805  | rs842545 | rs850738 | rs856563 | rs865225    |
| rs8176672 | rs818427  | rs825476 | rs833806  | rs842625 | rs851057 | rs856621 | rs865438    |
| rs8176685 | rs8184730 | rs825498 | rs833823  | rs842639 | rs851320 | rs856999 | rs865483    |
| rs8176693 | rs8184986 | rs8258   | rs833861  | rs843005 | rs851321 | rs857601 | rs865488    |
| rs8176704 | rs818678  | rs825941 | rs834603  | rs8432   | rs851977 | rs857684 | rs865603    |
| rs8176719 | rs8187929 | rs825962 | rs835115  | rs843339 | rs851990 | rs857689 | rs865686    |
| rs8176720 | rs8188203 | rs826220 | rs835154  | rs843370 | rs852004 | rs857691 | rs865719    |
| rs8176722 | rs8188241 | rs826222 | rs835209  | rs843750 | rs852033 | rs857721 | rs865809    |
| rs8176741 | rs8188557 | rs826415 | rs835259  | rs843778 | rs852069 | rs857725 | rs865869983 |
| rs8176743 | rs818898  | rs826681 | rs835278  | rs844193 | rs852121 | rs858215 | rs865923    |
| rs8176746 | rs8189480 | rs826682 | rs835574  | rs844215 | rs8523   | rs858239 | rs866153759 |
| rs8176747 | rs8189580 | rs826838 | rs8356    | rs844396 | rs852388 | rs858240 | rs866423    |
| rs8176749 | rs819135  | rs826952 | rs835633  | rs8444   | rs852390 | rs858267 | rs866457    |
| rs8176759 | rs819195  | rs827106 | rs835636  | rs845084 | rs852425 | rs858516 | rs866573    |
| rs8176786 | rs819196  | rs827123 | rs835648  | rs845093 | rs852434 | rs858518 | rs866905202 |
| rs8177179 | rs8191979 | rs827237 | rs835649  | rs846008 | rs852771 | rs858519 | rs866929    |
| rs8177240 | rs8191981 | rs827405 | rs835875  | rs846111 | rs852787 | rs859    | rs867186    |
| rs8177247 | rs8192284 | rs827620 | rs836179  | rs846876 | rs852928 | rs859208 | rs867319    |
| rs8177248 | rs8192327 | rs827624 | rs8362263 | rs846879 | rs852940 | rs859562 | rs867371    |
| rs8177253 | rs8192465 | rs827637 | rs836489  | rs846955 | rs853175 | rs859711 | rs867400    |
| rs8177260 | rs8192473 | rs827749 | rs836546  | rs847    | rs853195 | rs859715 | rs867489    |
| rs8177297 | rs8192482 | rs827751 | rs836927  | rs847139 | rs853198 | rs859725 | rs867529    |
| rs8177318 | rs8192590 | rs827803 | rs836968  | rs847147 | rs853199 | rs860010 | rs867560    |
| rs8177376 | rs8192675 | rs8283   | rs837065  | rs847157 | rs853234 | rs860262 | rs867606797 |
| rs8177641 | rs8192726 | rs828582 | rs837323  | rs847158 | rs853286 | rs860295 | rs867611    |
| rs8177654 | rs8192803 | rs8287   | rs837333  | rs847208 | rs853308 | rs860324 | rs867743    |
| rs8177656 | rs8192888 | rs828867 | rs837335  | rs8474   | rs853316 | rs860326 | rs867772    |
| rs8177683 | rs8192917 | rs828999 | rs837493  | rs847687 | rs853320 | rs860413 | rs867837383 |
| rs8177757 | rs8192999 | rs829021 | rs837500  | rs847688 | rs853353 | rs860626 | rs867939    |
| rs8177788 | rs8193016 | rs829375 | rs837705  | rs847821 | rs8534   | rs860735 | rs867972    |
| rs8177833 | rs819636  | rs829396 | rs837756  | rs847848 | rs853683 | rs860741 | rs868036    |
| rs8178058 | rs819865  | rs829402 | rs837763  | rs848    | rs853789 | rs860772 | rs868127    |
| rs817826  | rs820077  | rs829593 | rs837890  | rs848087 | rs853854 | rs860873 | rs868150    |
| rs8178414 | rs820218  | rs829636 | rs838046  | rs848188 | rs853866 | rs861020 | rs868153    |
| rs817847  | rs820299  | rs830124 | rs838133  | rs848209 | rs853974 | rs861029 | rs868155    |
| rs8178822 | rs820312  | rs830179 | rs838142  | rs848216 | rs854037 | rs8614   | rs868188    |
| rs8178824 | rs820343  | rs830233 | rs838144  | rs848286 | rs854089 | rs861400 | rs868202    |
| rs8178847 | rs820384  | rs830237 | rs838145  | rs848293 | rs854462 | rs861409 | rs868456    |
| rs8178848 | rs820430  | rs830383 | rs838705  | rs848302 | rs854469 | rs861442 | rs868554    |
| rs8178854 | rs820503  | rs830386 | rs838717  | rs848309 | rs854572 | rs861528 | rs868655    |
| rs8178977 | rs820504  | rs830407 | rs838718  | rs848445 | rs854624 | rs861536 | rs868698    |
| rs8179    | rs8207    | rs830620 | rs838720  | rs848457 | rs854625 | rs862034 | rs868754    |
| rs8179328 | rs8208    | rs830622 | rs838721  | rs848476 | rs854658 | rs862041 | rs868784    |
| rs8179684 | rs821100  | rs830643 | rs838735  | rs848486 | rs854674 | rs862045 | rs868822    |
| rs8179790 | rs821107  | rs830716 | rs838777  | rs848490 | rs854676 | rs862048 | rs868868    |
| rs8179795 | rs821317  | rs830910 | rs838876  | rs848492 | rs854765 | rs862051 | rs868943    |
| rs8179884 | rs821367  | rs831070 | rs838880  | rs848546 | rs854772 | rs862227 | rs868975575 |
| rs8180209 | rs821840  | rs831571 | rs838886  | rs848552 | rs854775 | rs862320 | rs869039    |
| rs8180282 | rs822354  | rs831636 | rs838909  | rs848602 | rs854776 | rs862687 | rs869056032 |
| rs8180457 | rs822493  | rs8321   | rs839228  | rs848606 | rs854788 | rs863006 | rs869090    |
| rs8180817 | rs822530  | rs832187 | rs839255  | rs848638 | rs854796 | rs863216 | rs869112    |
| rs8180991 | rs822531  | rs832190 | rs8396    | rs849133 | rs854807 | rs863678 | rs869135668 |
| rs8181047 | rs822551  | rs832540 | rs839755  | rs849134 | rs854917 | rs863724 | rs869167739 |
| rs8181166 | rs822552  | rs832586 | rs839758  | rs849135 | rs8551   | rs863750 | rs869197558 |
| rs8181326 | rs822834  | rs832805 | rs839761  | rs849138 | rs855250 | rs863930 | rs869244    |
| rs8181588 | rs822835  | rs832890 | rs839996  | rs849139 | rs855256 | rs863957 | rs869329    |
| rs8181612 | rs822928  | rs8330   | rs840161  | rs849140 | rs855286 | rs8640   | rs869330    |
| rs8181823 | rs823073  | rs833051 | rs840390  | rs849141 | rs855391 | rs864186 | rs869396    |



|          |          |             |          |          |          |          |             |
|----------|----------|-------------|----------|----------|----------|----------|-------------|
| rs869398 | rs874168 | rs878995    | rs884127 | rs889312 | rs894885 | rs901683 | rs909674    |
| rs869400 | rs874356 | rs879289447 | rs884152 | rs889398 | rs895526 | rs901705 | rs909685    |
| rs869402 | rs874441 | rs879294742 | rs884205 | rs88943  | rs895621 | rs901746 | rs909691    |
| rs869412 | rs874460 | rs879324    | rs884207 | rs889472 | rs895636 | rs901850 | rs909757    |
| rs869422 | rs874610 | rs87938     | rs884209 | rs889512 | rs895819 | rs901865 | rs909788    |
| rs869457 | rs874628 | rs879394    | rs884328 | rs889555 | rs895953 | rs901886 | rs910049    |
| rs869463 | rs874953 | rs879508109 | rs884366 | rs889695 | rs895964 | rs902144 | rs910083    |
| rs869487 | rs874966 | rs879568    | rs884439 | rs890067 | rs896156 | rs902226 | rs910085    |
| rs869640 | rs875008 | rs879619    | rs884847 | rs890074 | rs896263 | rs902289 | rs910187    |
| rs869730 | rs875037 | rs879620    | rs884894 | rs890076 | rs896319 | rs902305 | rs910382    |
| rs869784 | rs875075 | rs879627    | rs885036 | rs890195 | rs896322 | rs902356 | rs910416    |
| rs869785 | rs8751   | rs879634    | rs885100 | rs890205 | rs896435 | rs902627 | rs910586    |
| rs869841 | rs875106 | rs879751242 | rs885122 | rs890235 | rs896642 | rs902774 | rs910697    |
| rs87     | rs875107 | rs879983    | rs885150 | rs8904   | rs896655 | rs902820 | rs910805    |
| rs870142 | rs875153 | rs880090    | rs8853   | rs890431 | rs896693 | rs903269 | rs910873    |
| rs870151 | rs8753   | rs880095    | rs885389 | rs890498 | rs896773 | rs903270 | rs910889    |
| rs870160 | rs875361 | rs880315    | rs885479 | rs890832 | rs896847 | rs903357 | rs910912    |
| rs870288 | rs875480 | rs880379    | rs885518 | rs890924 | rs896852 | rs903361 | rs911119    |
| rs8705   | rs875500 | rs880446    | rs885683 | rs890940 | rs896854 | rs903432 | rs911149    |
| rs870527 | rs875519 | rs880674    | rs885916 | rs891058 | rs897080 | rs903691 | rs911186    |
| rs870581 | rs8756   | rs880695    | rs885932 | rs89107  | rs897186 | rs903771 | rs9112      |
| rs870589 | rs875622 | rs880749    | rs885946 | rs891088 | rs897200 | rs9038   | rs911263    |
| rs870681 | rs875740 | rs880923    | rs885950 | rs891124 | rs897306 | rs9039   | rs911300    |
| rs870713 | rs875741 | rs880930    | rs886114 | rs891378 | rs897356 | rs903911 | rs911526    |
| rs870731 | rs875742 | rs880949    | rs886420 | rs891387 | rs897392 | rs904092 | rs911527    |
| rs870825 | rs875837 | rs8810      | rs886424 | rs891389 | rs897453 | rs904199 | rs911547    |
| rs870992 | rs875858 | rs881090    | rs886444 | rs891511 | rs8978   | rs904274 | rs911555    |
| rs871014 | rs875908 | rs881144    | rs886448 | rs891556 | rs897804 | rs904310 | rs911603    |
| rs871024 | rs875968 | rs881177    | rs886477 | rs891762 | rs897877 | rs904475 | rs911641    |
| rs871134 | rs876036 | rs881299    | rs8866   | rs891792 | rs897984 | rs904592 | rs911760    |
| rs871250 | rs876037 | rs881301    | rs886774 | rs891793 | rs898518 | rs904801 | rs911793100 |
| rs871290 | rs876114 | rs881361    | rs886816 | rs891835 | rs898534 | rs905124 | rs912056    |
| rs871375 | rs876122 | rs881362    | rs886821 | rs892023 | rs898614 | rs905221 | rs912057    |
| rs871524 | rs876214 | rs881375    | rs886942 | rs892080 | rs898673 | rs905224 | rs912131    |
| rs871537 | rs876308 | rs881376    | rs887013 | rs892085 | rs898696 | rs905670 | rs912202    |
| rs871606 | rs876403 | rs881485    | rs887027 | rs892090 | rs898750 | rs905739 | rs912213    |
| rs871656 | rs876424 | rs881491    | rs887241 | rs892145 | rs898797 | rs905761 | rs912387    |
| rs871677 | rs876435 | rs881492    | rs887258 | rs8922   | rs899010 | rs905871 | rs9124      |
| rs871728 | rs876476 | rs881591    | rs887369 | rs892225 | rs899013 | rs905938 | rs912425    |
| rs871841 | rs876531 | rs881613    | rs887387 | rs892244 | rs899040 | rs905993 | rs912434    |
| rs871994 | rs876537 | rs881844    | rs887477 | rs892254 | rs899041 | rs906363 | rs912535    |
| rs872071 | rs8766   | rs881858    | rs887595 | rs892362 | rs899153 | rs906364 | rs912690    |
| rs872123 | rs876727 | rs881878    | rs887696 | rs892448 | rs899244 | rs906427 | rs912759    |
| rs872146 | rs876793 | rs881972    | rs887807 | rs893001 | rs899245 | rs906568 | rs912783    |
| rs872256 | rs877116 | rs882189    | rs887829 | rs893245 | rs899333 | rs906578 | rs9128      |
| rs872281 | rs877172 | rs8823      | rs887912 | rs893311 | rs899366 | rs907091 | rs912855    |
| rs872355 | rs877313 | rs882367    | rs887945 | rs893363 | rs899428 | rs907092 | rs912883    |
| rs872440 | rs877483 | rs882380    | rs888194 | rs893468 | rs899505 | rs907183 | rs913021    |
| rs872583 | rs877529 | rs882601    | rs8882   | rs893516 | rs899631 | rs907366 | rs9131      |
| rs872676 | rs877819 | rs882609    | rs888316 | rs893522 | rs899632 | rs907611 | rs913257    |
| rs872863 | rs8780   | rs882638    | rs888368 | rs893540 | rs899865 | rs907612 | rs913264    |
| rs872914 | rs878017 | rs882732    | rs888415 | rs893541 | rs899927 | rs907662 | rs913455    |
| rs873093 | rs878177 | rs882951    | rs888655 | rs893617 | rs899961 | rs907683 | rs913493    |
| rs873122 | rs878323 | rs883079    | rs888663 | rs893812 | rs899963 | rs9077   | rs913499    |
| rs873549 | rs878409 | rs883220    | rs8887   | rs893817 | rs899997 | rs907866 | rs913509    |
| rs873553 | rs878471 | rs883245    | rs888762 | rs893818 | rs900    | rs908084 | rs913588    |
| rs873590 | rs878481 | rs883284    | rs888812 | rs893819 | rs900144 | rs908327 | rs913672    |
| rs8736   | rs878504 | rs883323    | rs888838 | rs893907 | rs900145 | rs908443 | rs913678    |
| rs873636 | rs878521 | rs883325    | rs888920 | rs893929 | rs900348 | rs908668 | rs913687    |
| rs873693 | rs878639 | rs883403    | rs888987 | rs893946 | rs900399 | rs908730 | rs913930    |
| rs873779 | rs878756 | rs883425    | rs889014 | rs894210 | rs900400 | rs908822 | rs913987    |
| rs873786 | rs878825 | rs883496    | rs88906  | rs894344 | rs900504 | rs908830 | rs914328    |
| rs874    | rs878860 | rs883541    | rs889122 | rs894348 | rs900669 | rs908975 | rs914554    |
| rs874031 | rs878905 | rs883625    | rs889138 | rs894542 | rs900800 | rs909002 | rs914615    |
| rs874040 | rs878907 | rs883770    | rs889140 | rs894680 | rs900835 | rs909116 | rs915057    |
| rs874060 | rs878922 | rs883871    | rs889169 | rs894739 | rs9013   | rs909152 | rs915125    |
| rs874100 | rs878944 | rs884108    | rs889299 | rs894872 | rs901630 | rs909341 | rs915286    |

|          |           |           |           |           |           |           |           |
|----------|-----------|-----------|-----------|-----------|-----------|-----------|-----------|
| rs915416 | rs921968  | rs926105  | rs9267516 | rs9271117 | rs9274247 | rs9277952 | rs9289330 |
| rs915652 | rs921971  | rs9261224 | rs9267522 | rs9271176 | rs9274299 | rs9277972 | rs9289639 |
| rs915814 | rs922     | rs9261269 | rs9267531 | rs9271192 | rs9274346 | rs9277988 | rs9289758 |
| rs916379 | rs922000  | rs9261281 | rs9267548 | rs9271209 | rs9274390 | rs9277992 | rs9289798 |
| rs916385 | rs922049  | rs9261418 | rs9267576 | rs9271215 | rs9274407 | rs9278250 | rs9289834 |
| rs9165   | rs922168  | rs9261431 | rs9267647 | rs9271324 | rs9274477 | rs927826  | rs9289894 |
| rs916694 | rs922182  | rs9261484 | rs9267650 | rs9271365 | rs9274600 | rs927833  | rs9289979 |
| rs916784 | rs922692  | rs9261659 | rs9267653 | rs9271366 | rs9274623 | rs9279167 | rs9289981 |
| rs916880 | rs922782  | rs9262120 | rs9267658 | rs9271401 | rs9274657 | rs9279411 | rs9290351 |
| rs916888 | rs922857  | rs9262143 | rs9267659 | rs9271406 | rs9274659 | rs9279623 | rs9290361 |
| rs916893 | rs922984  | rs926231  | rs9267665 | rs9271421 | rs9274678 | rs928109  | rs9290366 |
| rs916964 | rs923118  | rs9262631 | rs9267677 | rs9271536 | rs9274704 | rs928111  | rs9290424 |
| rs916977 | rs923198  | rs9262632 | rs9267797 | rs9271547 | rs9274719 | rs9281557 | rs9290867 |
| rs916978 | rs923375  | rs926300  | rs9267812 | rs9271573 | rs927485  | rs9282541 | rs9290877 |
| rs91710  | rs923512  | rs926326  | rs9267823 | rs9271578 | rs9274890 | rs9282552 | rs9291    |
| rs917115 | rs923621  | rs926331  | rs9267853 | rs9271585 | rs9274903 | rs9282641 | rs9291034 |
| rs917116 | rs923724  | rs9263475 | rs926788  | rs9271588 | rs9274954 | rs9282834 | rs9291211 |
| rs917117 | rs923931  | rs9263688 | rs9267995 | rs9271597 | rs9275052 | rs9282858 | rs9291437 |
| rs917191 | rs923994  | rs9263737 | rs9268155 | rs9271608 | rs9275152 | rs9282864 | rs9291444 |
| rs917195 | rs924043  | rs9263739 | rs9268199 | rs9271611 | rs9275184 | rs9283408 | rs9291547 |
| rs917275 | rs924067  | rs9263861 | rs9268402 | rs9271640 | rs9275224 | rs9283650 | rs9291634 |
| rs917304 | rs924080  | rs9263868 | rs926849  | rs9271642 | rs9275241 | rs9283735 | rs9291768 |
| rs91731  | rs924135  | rs9263871 | rs9268500 | rs9271695 | rs9275260 | rs9283893 | rs9291816 |
| rs917412 | rs924318  | rs9263993 | rs9268516 | rs9271701 | rs9275281 | rs928391  | rs9291822 |
| rs917570 | rs924607  | rs9264413 | rs9268541 | rs9271737 | rs9275282 | rs9283946 | rs9291879 |
| rs917577 | rs9247    | rs9264533 | rs9268557 | rs9271762 | rs9275292 | rs9284092 | rs9291932 |
| rs917665 | rs924753  | rs9264638 | rs9268559 | rs9271770 | rs9275319 | rs928412  | rs9292468 |
| rs917726 | rs924981  | rs9264639 | rs9268644 | rs9271774 | rs9275326 | rs928413  | rs929250  |
| rs917727 | rs925098  | rs9264664 | rs9268645 | rs9271858 | rs9275390 | rs9284241 | rs9292777 |
| rs917783 | rs925161  | rs9264845 | rs9268652 | rs9271925 | rs9275406 | rs9284262 | rs9292918 |
| rs917793 | rs925228  | rs9264875 | rs9268659 | rs9272050 | rs9275428 | rs9284725 | rs9293291 |
| rs917813 | rs925255  | rs9264904 | rs9268671 | rs9272105 | rs9275497 | rs9284802 | rs9293338 |
| rs917863 | rs925484  | rs9264941 | rs9268813 | rs9272143 | rs9275511 | rs9284813 | rs9293499 |
| rs917911 | rs925488  | rs9264942 | rs9268831 | rs9272154 | rs9275524 | rs9284956 | rs9293518 |
| rs917997 | rs925489  | rs9264945 | rs9268839 | rs9272309 | rs9275563 | rs9285397 | rs9293749 |
| rs918227 | rs925524  | rs9264962 | rs9268848 | rs9272346 | rs9275570 | rs9285425 | rs9293758 |
| rs918466 | rs925550  | rs9265153 | rs9268853 | rs9272371 | rs9275572 | rs9285673 | rs9294260 |
| rs918472 | rs9256938 | rs9265503 | rs9268856 | rs9272426 | rs9275576 | rs9285942 | rs929474  |
| rs918765 | rs9257248 | rs926552  | rs9268877 | rs9272535 | rs9275582 | rs9286060 | rs929477  |
| rs918814 | rs925735  | rs9265828 | rs9268896 | rs9272544 | rs9275592 | rs9286351 | rs9294770 |
| rs91894  | rs9257408 | rs9265968 | rs9268905 | rs9272545 | rs9275596 | rs928674  | rs9294963 |
| rs919045 | rs9257566 | rs9266077 | rs9268923 | rs9272729 | rs9275602 | rs9286879 | rs929511  |
| rs919113 | rs9257681 | rs9266089 | rs9268925 | rs9272777 | rs9275642 | rs9287090 | rs9295123 |
| rs919129 | rs9257800 | rs9266184 | rs9269080 | rs9272780 | rs9275698 | rs928722  | rs9295128 |
| rs919386 | rs9257802 | rs9266229 | rs9269081 | rs927292  | rs9276244 | rs9287237 | rs9295143 |
| rs919462 | rs9257809 | rs9266230 | rs9269234 | rs9272975 | rs9276263 | rs928736  | rs9295475 |
| rs919642 | rs9257927 | rs9266237 | rs9269271 | rs9273012 | rs9276370 | rs9287604 | rs9295482 |
| rs919791 | rs9257985 | rs9266255 | rs926928  | rs9273039 | rs9276423 | rs9287636 | rs9295486 |
| rs919798 | rs9258260 | rs9266257 | rs926938  | rs9273062 | rs9276427 | rs9287638 | rs9295536 |
| rs9198   | rs9258375 | rs9266276 | rs9269573 | rs9273076 | rs9276434 | rs9287719 | rs9295661 |
| rs919823 | rs9258644 | rs9266289 | rs9269771 | rs9273123 | rs9276435 | rs9287838 | rs9295688 |
| rs920050 | rs9258750 | rs926630  | rs9269853 | rs9273177 | rs9276606 | rs9287911 | rs9295769 |
| rs920112 | rs925946  | rs9266406 | rs9270074 | rs927332  | rs9276643 | rs9287914 | rs9295795 |
| rs920590 | rs925947  | rs9266428 | rs9270186 | rs9273349 | rs9276796 | rs9287979 | rs9295825 |
| rs920900 | rs925966  | rs9266444 | rs9270475 | rs9273363 | rs9276975 | rs9287989 | rs929596  |
| rs920915 | rs9259819 | rs9266490 | rs9270493 | rs9273364 | rs9277332 | rs9287993 | rs9295987 |
| rs920990 | rs9260127 | rs926657  | rs9270576 | rs9273368 | rs9277341 | rs9287994 | rs9296004 |
| rs921107 | rs9260155 | rs9266629 | rs9270637 | rs9273370 | rs9277342 | rs9288447 | rs9296009 |
| rs921153 | rs9260164 | rs9266634 | rs9270747 | rs9273373 | rs9277356 | rs9288520 | rs9296015 |
| rs921313 | rs9260313 | rs9266745 | rs9270750 | rs9273374 | rs9277378 | rs9288725 | rs9296068 |
| rs921471 | rs9260426 | rs9266766 | rs9270779 | rs9273401 | rs9277464 | rs9288782 | rs9296095 |
| rs921650 | rs9260489 | rs9266772 | rs9270891 | rs9273404 | rs9277535 | rs9288795 | rs9296149 |
| rs9217   | rs9260619 | rs9267057 | rs9270911 | rs9273410 | rs9277549 | rs9288868 | rs9296151 |
| rs921720 | rs9260620 | rs9267098 | rs9270965 | rs9273501 | rs9277552 | rs9288898 | rs9296208 |
| rs921874 | rs9260639 | rs9267257 | rs9270984 | rs9273542 | rs9277554 | rs9288999 | rs9296249 |
| rs921919 | rs926070  | rs9267485 | rs9271060 | rs9273552 | rs9277636 | rs9289296 | rs929626  |
| rs921943 | rs926103  | rs9267488 | rs9271100 | rs9274235 | rs9277841 | rs9289300 | rs9296369 |

|           |           |           |             |           |           |           |             |
|-----------|-----------|-----------|-------------|-----------|-----------|-----------|-------------|
| rs9296398 | rs9304936 | rs9316871 | rs932536    | rs9337951 | rs9350191 | rs9362083 | rs9369327   |
| rs9296404 | rs930530  | rs931688  | rs9325377   | rs933807  | rs9350271 | rs9362097 | rs9369409   |
| rs9296406 | rs9305545 | rs9316969 | rs9325434   | rs933822  | rs9350272 | rs936226  | rs9369425   |
| rs929641  | rs930579  | rs9316971 | rs9325435   | rs933899  | rs9350408 | rs936229  | rs9369640   |
| rs9296559 | rs9306160 | rs9317002 | rs932589    | rs9340995 | rs9350413 | rs9362417 | rs9369695   |
| rs9296668 | rs9306335 | rs9317213 | rs9326248   | rs9341575 | rs9350591 | rs9362897 | rs9369898   |
| rs9296736 | rs9306395 | rs9317758 | rs932631509 | rs934177  | rs9350902 | rs9362971 | rs9369915   |
| rs9296804 | rs9306459 | rs931794  | rs9326726   | rs934178  | rs935111  | rs9363467 | rs9370068   |
| rs9296938 | rs9306547 | rs9318086 | rs9326754   | rs9341808 | rs9351120 | rs9363753 | rs9370243   |
| rs9297016 | rs930672  | rs9318213 | rs9327000   | rs9341844 | rs935116  | rs9364192 | rs9370527   |
| rs9297145 | rs9306894 | rs9318373 | rs9327294   | rs934197  | rs9351209 | rs9364386 | rs9370774   |
| rs9297415 | rs9306895 | rs9318511 | rs9327298   | rs934198  | rs9351259 | rs9364552 | rs9370793   |
| rs9297524 | rs93075   | rs9319382 | rs9327301   | rs9341990 | rs9351595 | rs9364554 | rs9370823   |
| rs9297718 | rs9307551 | rs9319415 | rs9327336   | rs9342115 | rs9351637 | rs9364562 | rs9371220   |
| rs9297768 | rs9308315 | rs9319428 | rs9327454   | rs9342117 | rs935168  | rs9364611 | rs9371221   |
| rs9297779 | rs9308424 | rs9319615 | rs9327455   | rs934237  | rs9352374 | rs9364664 | rs9371533   |
| rs9297905 | rs930846  | rs9319617 | rs9327468   | rs9343481 | rs9352808 | rs9364687 | rs9371538   |
| rs9297949 | rs930847  | rs9319895 | rs9327638   | rs9343861 | rs9352872 | rs936496  | rs9371601   |
| rs9297994 | rs9308614 | rs931992  | rs932764    | rs9344    | rs9353192 | rs9364973 | rs9371883   |
| rs9298343 | rs9308731 | rs9319943 | rs9327881   | rs9344420 | rs9353446 | rs9365050 | rs9371912   |
| rs929843  | rs9308788 | rs9319949 | rs9328050   | rs9344512 | rs9353806 | rs936513  | rs9372092   |
| rs9298506 | rs9308868 | rs9319961 | rs9328192   | rs9344688 | rs9353834 | rs9365169 | rs9372120   |
| rs9298749 | rs930900  | rs9320010 | rs932827    | rs9344695 | rs935402  | rs9365555 | rs937213    |
| rs9298995 | rs9309013 | rs9320278 | rs9328393   | rs9345124 | rs9355416 | rs9365769 | rs9372208   |
| rs9299    | rs9309245 | rs9320282 | rs9328534   | rs9345125 | rs9355610 | rs9366291 | rs9372253   |
| rs9299129 | rs9309272 | rs932036  | rs932879    | rs934515  | rs9355814 | rs9366426 | rs9372414   |
| rs9299338 | rs9309413 | rs9320648 | rs9329170   | rs9345234 | rs9355878 | rs9366639 | rs9372498   |
| rs9299597 | rs9309434 | rs9320747 | rs9329221   | rs9345268 | rs9356009 | rs9366651 | rs9372625   |
| rs9300169 | rs9309473 | rs9320823 | rs9329227   | rs9345737 | rs9356013 | rs9366656 | rs9372667   |
| rs9300255 | rs9309771 | rs9320841 | rs9329300   | rs9346486 | rs9356100 | rs9366673 | rs9372696   |
| rs930036  | rs9309922 | rs9320913 | rs9329342   | rs9346514 | rs935655  | rs9366697 | rs9372732   |
| rs9300430 | rs9309969 | rs9320980 | rs933006    | rs9346633 | rs9356551 | rs9366717 | rs9372873   |
| rs9300546 | rs9310400 | rs9320995 | rs9330264   | rs9346930 | rs9356632 | rs9366770 | rs9372883   |
| rs930055  | rs9310736 | rs9321106 | rs9330272   | rs9347032 | rs9356744 | rs9366778 | rs9372915   |
| rs9300607 | rs9310852 | rs9321171 | rs9330348   | rs9347258 | rs9356988 | rs9366803 | rs9372944   |
| rs9300612 | rs9310995 | rs9321266 | rs9330353   | rs934734  | rs9357047 | rs9366816 | rs9372987   |
| rs9300750 | rs9311474 | rs9321309 | rs9330360   | rs9347434 | rs9357048 | rs9366846 | rs9373014   |
| rs9302065 | rs9311507 | rs9321453 | rs9330381   | rs9347687 | rs9357080 | rs9366863 | rs9373124   |
| rs930231  | rs9311623 | rs9321459 | rs9330462   | rs9347720 | rs9357120 | rs9366876 | rs9373363   |
| rs930232  | rs9311676 | rs9321485 | rs9330542   | rs9347737 | rs9357121 | rs9366927 | rs9373387   |
| rs9302592 | rs931235  | rs9321501 | rs9330638   | rs9347800 | rs9357152 | rs9367021 | rs9373523   |
| rs9302604 | rs9312937 | rs9321659 | rs9330799   | rs9347896 | rs9357155 | rs9367125 | rs9373590   |
| rs9302605 | rs931302  | rs9321870 | rs9330813   | rs9347926 | rs9357255 | rs9367279 | rs9373594   |
| rs9302635 | rs9313497 | rs932203  | rs9330814   | rs9348050 | rs9357271 | rs9367369 | rs937380553 |
| rs9302652 | rs9313643 | rs9322194 | rs933089    | rs9348440 | rs935728  | rs9367523 | rs9373839   |
| rs9302690 | rs9313736 | rs932223  | rs9331343   | rs9348512 | rs9357362 | rs9367524 | rs9373896   |
| rs9302752 | rs9313754 | rs9322332 | rs9331896   | rs9348721 | rs9357446 | rs9367621 | rs9374066   |
| rs930295  | rs9313772 | rs9322428 | rs9332245   | rs9348726 | rs9357551 | rs9367716 | rs9374080   |
| rs9303241 | rs9313777 | rs9322572 | rs9332407   | rs9348729 | rs9357620 | rs9367851 | rs9374081   |
| rs9303277 | rs9313808 | rs9322589 | rs9332470   | rs9348739 | rs9357627 | rs9367926 | rs9374170   |
| rs9303279 | rs9314323 | rs932267  | rs9332591   | rs9348792 | rs9357733 | rs9367942 | rs9374194   |
| rs9303280 | rs9314614 | rs9322822 | rs9332599   | rs9348865 | rs9358356 | rs9368112 | rs9374757   |
| rs9303406 | rs9314907 | rs9323280 | rs9332653   | rs9348895 | rs9358372 | rs9368207 | rs9374842   |
| rs9303471 | rs9314998 | rs9323326 | rs9332701   | rs9348970 | rs935861  | rs9368222 | rs9374896   |
| rs9303509 | rs9315009 | rs9323328 | rs9332739   | rs9348981 | rs9358694 | rs9368375 | rs9375031   |
| rs9303521 | rs9315015 | rs9323497 | rs9332781   | rs9349050 | rs9358912 | rs9368402 | rs9375037   |
| rs9303525 | rs9315204 | rs9323612 | rs9332801   | rs9349200 | rs9358913 | rs9368503 | rs9375150   |
| rs9303542 | rs9315420 | rs9323746 | rs9332817   | rs9349201 | rs9358956 | rs9368624 | rs9375185   |
| rs9303554 | rs931550  | rs9323988 | rs9332998   | rs9349204 | rs9359555 | rs9368649 | rs9375188   |
| rs9303601 | rs9315702 | rs9324022 | rs9333029   | rs9349205 | rs9359939 | rs9368661 | rs9375284   |
| rs9303620 | rs9315786 | rs9324058 | rs9333075   | rs9349211 | rs9360234 | rs9368677 | rs9375298   |
| rs930395  | rs9315846 | rs9324233 | rs9333585   | rs9349309 | rs9360557 | rs9368730 | rs9375352   |
| rs9303973 | rs9316500 | rs9324380 | rs9333660   | rs9349322 | rs9360921 | rs9368783 | rs9375403   |
| rs9304381 | rs9316505 | rs9324593 | rs933414    | rs9349337 | rs9361491 | rs9368805 | rs9375414   |
| rs9304383 | rs9316619 | rs9324887 | rs933561    | rs9349379 | rs9361614 | rs9368830 | rs9375417   |
| rs9304813 | rs9316706 | rs9324890 | rs933574    | rs9349407 | rs9361840 | rs9368851 | rs9375447   |
| rs9304832 | rs9316807 | rs9325144 | rs933738    | rs9349956 | rs9361886 | rs9368924 | rs9375459   |

|           |             |           |           |           |           |           |           |
|-----------|-------------|-----------|-----------|-----------|-----------|-----------|-----------|
| rs9375463 | rs9380522   | rs9387478 | rs9393623 | rs9399135 | rs9409078 | rs9421581 | rs943580  |
| rs9375476 | rs9380534   | rs9387626 | rs9393688 | rs9399136 | rs9409082 | rs9422857 | rs9436116 |
| rs9375477 | rs9380535   | rs9387640 | rs9393692 | rs9399137 | rs9409085 | rs9423024 | rs9436119 |
| rs9375694 | rs9380559   | rs9387711 | rs9393716 | rs939916  | rs9409150 | rs9423279 | rs9436303 |
| rs9375695 | rs9380638   | rs9387925 | rs9393777 | rs9399245 | rs9409266 | rs9423289 | rs9436640 |
| rs9375700 | rs9380700   | rs9387963 | rs9393800 | rs9399401 | rs9409565 | rs942353  | rs9436661 |
| rs9375702 | rs9380826   | rs938836  | rs9393805 | rs9399469 | rs9409710 | rs9423612 | rs9436747 |
| rs9375787 | rs9380830   | rs9388451 | rs9393903 | rs9399599 | rs9409793 | rs9424354 | rs9436866 |
| rs9375800 | rs9381084   | rs9388489 | rs9393915 | rs939960  | rs9409844 | rs942453  | rs9436888 |
| rs9375813 | rs9381107   | rs9388490 | rs9393926 | rs9399613 | rs9410380 | rs9424976 | rs9436980 |
| rs9375818 | rs9381118   | rs9388498 | rs939400  | rs9399619 | rs9410573 | rs9425020 | rs9437742 |
| rs9375946 | rs9381248   | rs9388520 | rs9394026 | rs939963  | rs94111   | rs9425573 | rs9438    |
| rs9376055 | rs9381266   | rs9388537 | rs9394102 | rs939974  | rs9411103 | rs9425634 | rs9438393 |
| rs9376072 | rs9381340   | rs9388588 | rs9394154 | rs9399978 | rs9411298 | rs9426003 | rs9438610 |
| rs9376090 | rs9381563   | rs9388686 | rs9394159 | rs940     | rs9411331 | rs942642  | rs9438626 |
| rs9376091 | rs9381634   | rs9388766 | rs939421  | rs9400239 | rs9411332 | rs942653  | rs9438874 |
| rs9376092 | rs9381653   | rs9388768 | rs9394227 | rs9400271 | rs9411377 | rs9426660 | rs9438876 |
| rs9376098 | rs9381812   | rs9388880 | rs9394283 | rs9400273 | rs9411378 | rs9426736 | rs9438901 |
| rs9376164 | rs9382107   | rs9388953 | rs9394288 | rs9400379 | rs9411412 | rs9426781 | rs9438905 |
| rs9376273 | rs9382170   | rs9389081 | rs9394363 | rs9400467 | rs9411425 | rs9426827 | rs9439074 |
| rs9376354 | rs9382192   | rs9389248 | rs9394502 | rs9400888 | rs9411489 | rs9426829 | rs9439082 |
| rs9376382 | rs9382445   | rs9389263 | rs9394574 | rs9401025 | rs941207  | rs9426942 | rs9439713 |
| rs9376438 | rs9382484   | rs9389268 | rs9394647 | rs9401090 | rs941346  | rs9427104 | rs9439714 |
| rs937651  | rs9382681   | rs9389269 | rs9394822 | rs9401101 | rs941407  | rs9427116 | rs944002  |
| rs9376511 | rs938291    | rs9389270 | rs9394841 | rs9401295 | rs941408  | rs9427398 | rs944028  |
| rs9376609 | rs938295    | rs9389316 | rs9394948 | rs9401305 | rs941446  | rs9427401 | rs944172  |
| rs9376716 | rs9383018   | rs9389786 | rs9394951 | rs9401451 | rs941454  | rs9427403 | rs9441956 |
| rs9376959 | rs9383064   | rs9389985 | rs9394987 | rs9401452 | rs9414801 | rs9427672 | rs9442514 |
| rs9378160 | rs9383146   | rs9389987 | rs9395049 | rs9401560 | rs9415064 | rs9427716 | rs9442598 |
| rs9378212 | rs938348    | rs9390019 | rs9395520 | rs9401593 | rs9415106 | rs9428104 | rs9442750 |
| rs9378213 | rs9383605   | rs9390022 | rs9395623 | rs940174  | rs941520  | rs9428108 | rs944289  |
| rs9378220 | rs9383643   | rs9390030 | rs939563  | rs9401907 | rs9415676 | rs942813  | rs9442952 |
| rs9378248 | rs9383649   | rs9390032 | rs9395644 | rs9401944 | rs941576  | rs942820  | rs9443189 |
| rs9378249 | rs9383820   | rs9390033 | rs939574  | rs9401951 | rs941591  | rs9428295 | rs944340  |
| rs9378307 | rs9383929   | rs9390103 | rs939583  | rs9401974 | rs9416017 | rs9428576 | rs9443645 |
| rs9378319 | rs9383936   | rs9390459 | rs939584  | rs9402211 | rs9416018 | rs942866  | rs944370  |
| rs9378485 | rs9383938   | rs9390460 | rs9396083 | rs9402472 | rs9416087 | rs9428966 | rs9444166 |
| rs937851  | rs9384      | rs9390461 | rs939658  | rs9402490 | rs941616  | rs9429088 | rs944433  |
| rs9378671 | rs9384458   | rs939105  | rs9396582 | rs9402633 | rs9416703 | rs942922  | rs9444967 |
| rs9378682 | rs9384478   | rs9391253 | rs939666  | rs9402673 | rs9416744 | rs9429468 | rs9446060 |
| rs9378796 | rs9384679   | rs939136  | rs9396858 | rs9402682 | rs941718  | rs9429539 | rs944694  |
| rs9378815 | rs938496    | rs9391774 | rs9397040 | rs9402685 | rs9417567 | rs9429544 | rs9447004 |
| rs9378999 | rs9385199   | rs9391786 | rs939715  | rs9402686 | rs941758  | rs9429742 | rs944722  |
| rs9379066 | rs938525    | rs9391803 | rs9397403 | rs9402846 | rs941764  | rs943005  | rs9447700 |
| rs9379083 | rs9385271   | rs9391858 | rs9397414 | rs9403317 | rs941799  | rs9430095 | rs944797  |
| rs9379084 | rs9385399   | rs9391993 | rs9397436 | rs9403391 | rs941816  | rs9430161 | rs944800  |
| rs9379121 | rs9385403   | rs9391997 | rs9397437 | rs940341  | rs941823  | rs943035  | rs944801  |
| rs9379130 | rs9385532   | rs9392017 | rs9397585 | rs9403716 | rs941873  | rs943037  | rs944802  |
| rs9379328 | rs938554    | rs9392026 | rs9397738 | rs9403991 | rs9419224 | rs943072  | rs944857  |
| rs9379764 | rs9385616   | rs9392037 | rs9397763 | rs9405084 | rs941923  | rs943080  | rs9448840 |
| rs9379820 | rs9385650   | rs9392328 | rs9397806 | rs9405098 | rs9419387 | rs9431    | rs9448944 |
| rs9379829 | rs9385695   | rs9392348 | rs9397822 | rs9405157 | rs9419741 | rs9431431 | rs9449295 |
| rs9379831 | rs9385775   | rs9392366 | rs9398035 | rs9405192 | rs9419788 | rs943262  | rs9449350 |
| rs9379832 | rs9385808   | rs9392394 | rs9398070 | rs9405490 | rs9419958 | rs943344  | rs9449896 |
| rs9379833 | rs9385910   | rs9392441 | rs9398171 | rs9405503 | rs9420    | rs943346  | rs9449914 |
| rs9379850 | rs9385988   | rs9392465 | rs9398173 | rs9405909 | rs942017  | rs943423  | rs9450112 |
| rs9379862 | rs9386110   | rs9392504 | rs939834  | rs9406316 | rs9420434 | rs943439  | rs9450351 |
| rs9379870 | rs9386630   | rs9392556 | rs9398417 | rs9406517 | rs9420446 | rs943451  | rs9451139 |
| rs9379945 | rs9386775   | rs9392563 | rs9398586 | rs9407640 | rs9420636 | rs943466  | rs9451140 |
| rs9380007 | rs9386780   | rs9392827 | rs9398642 | rs940780  | rs9420637 | rs9434723 | rs9451146 |
| rs9380010 | rs9386788   | rs9392840 | rs9398652 | rs9408674 | rs942064  | rs943501  | rs945170  |
| rs9380142 | rs9386791   | rs9392918 | rs9398803 | rs940873  | rs9420641 | rs9435144 | rs945187  |
| rs9380159 | rs9386793   | rs939317  | rs9398804 | rs9408815 | rs942066  | rs9435179 | rs9451947 |
| rs9380254 | rs938682    | rs9393294 | rs9398815 | rs9408817 | rs9420907 | rs9435340 | rs945211  |
| rs9380272 | rs9386909   | rs9393302 | rs9398823 | rs9408926 | rs9421249 | rs9435731 | rs945213  |
| rs9380371 | rs9387042   | rs9393339 | rs9398842 | rs9408928 | rs9421250 | rs9435732 | rs9452161 |
| rs9380500 | rs938729214 | rs9393348 | rs9399078 | rs940904  | rs9421409 | rs9435733 | rs9452333 |

|           |             |           |           |            |           |           |           |
|-----------|-------------|-----------|-----------|------------|-----------|-----------|-----------|
| rs945270  | rs9467191   | rs9472138 | rs948493  | rs949782   | rs9513416 | rs952472  | rs9534288 |
| rs945294  | rs9467373   | rs9472139 | rs948494  | rs9497965  | rs9513510 | rs9524862 | rs9534338 |
| rs945310  | rs9467603   | rs9472155 | rs9485244 | rs9498925  | rs9513573 | rs9525625 | rs9534439 |
| rs945347  | rs9467704   | rs9472159 | rs9485372 | rs950039   | rs9513593 | rs9525638 | rs9534458 |
| rs945425  | rs9467707   | rs9472168 | rs9486370 | rs9500927  | rs951366  | rs952579  | rs9534461 |
| rs9454297 | rs9467711   | rs9472325 | rs9486689 | rs9501161  | rs9513696 | rs9525927 | rs9534463 |
| rs945508  | rs9467714   | rs9472414 | rs9486715 | rs9501251  | rs9513754 | rs952594  | rs9534678 |
| rs945617  | rs9467773   | rs9472521 | rs9486719 | rs9501618  | rs9513780 | rs9526001 | rs953492  |
| rs9456307 | rs9467777   | rs9472541 | rs9486729 | rs950169   | rs9513995 | rs9526023 | rs9534949 |
| rs945631  | rs9467804   | rs9473117 | rs9486913 | rs9501744  | rs9514131 | rs9526137 | rs9534950 |
| rs9456508 | rs946806    | rs9473132 | rs9486916 | rs9501753  | rs9514191 | rs9526138 | rs9535006 |
| rs9456648 | rs9468195   | rs9473147 | rs9487023 | rs9501778  | rs9515201 | rs9526212 | rs9535100 |
| rs945686  | rs9468199   | rs947350  | rs9487032 | rs950200   | rs9515203 | rs952623  | rs9535244 |
| rs9457247 | rs946824    | rs947385  | rs9487043 | rs9502009  | rs9515214 | rs952632  | rs9535263 |
| rs9457466 | rs9468445   | rs9474019 | rs948705  | rs950251   | rs9515446 | rs9526646 | rs9535333 |
| rs9457478 | rs9468569   | rs947409  | rs9487051 | rs9502570  | rs9515905 | rs9526707 | rs9535495 |
| rs9457515 | rs9468693   | rs947474  | rs948708  | rs9503199  | rs9516053 | rs9526736 | rs9535566 |
| rs9457516 | rs9468925   | rs9475474 | rs9487605 | rs9503212  | rs9516120 | rs9527    | rs953567  |
| rs9457799 | rs9469003   | rs9475512 | rs9487626 | rs9503598  | rs9516194 | rs9527039 | rs953568  |
| rs9457800 | rs9469012   | rs9475676 | rs948810  | rs9503599  | rs9516547 | rs9527083 | rs9535753 |
| rs9457827 | rs9469054   | rs9475677 | rs9488655 | rs9503803  | rs9516776 | rs9527094 | rs9536201 |
| rs9457840 | rs9469084   | rs9475752 | rs9488822 | rs9504361  | rs9516855 | rs9527336 | rs9536382 |
| rs9457925 | rs9469099   | rs9475771 | rs9489510 | rs9504483  | rs9516857 | rs9527342 | rs9536383 |
| rs9458010 | rs9469112   | rs947583  | rs9489520 | rs9504915  | rs9516861 | rs9527345 | rs9536442 |
| rs9458809 | rs9469174   | rs947612  | rs9489945 | rs9504921  | rs9516865 | rs9527455 | rs9536462 |
| rs9458859 | rs9469220   | rs947627  | rs9490002 | rs9505085  | rs9517299 | rs9527662 | rs9536961 |
| rs9459130 | rs9469434   | rs9476307 | rs9490317 | rs9505086  | rs9517310 | rs9527727 | rs9537160 |
| rs9460014 | rs9469503   | rs9476310 | rs9490318 | rs9505097  | rs9517313 | rs9527864 | rs9537521 |
| rs9460100 | rs9469578   | rs947643  | rs9490443 | rs9505118  | rs951740  | rs9527905 | rs9537782 |
| rs9460550 | rs9469583   | rs9477074 | rs9490446 | rs9505274  | rs9517448 | rs9528062 | rs9537814 |
| rs9460664 | rs9469761   | rs9477762 | rs9490512 | rs9505301  | rs9517686 | rs9529055 | rs9538136 |
| rs946106  | rs9469762   | rs9477866 | rs949078  | rs950608   | rs9517913 | rs9529119 | rs9538146 |
| rs9461218 | rs9469775   | rs947791  | rs9491565 | rs9506281  | rs9517964 | rs9529146 | rs9538160 |
| rs9461224 | rs9469890   | rs9477970 | rs9491689 | rs9506725  | rs9518075 | rs9529148 | rs9538162 |
| rs9461418 | rs9469899   | rs9478217 | rs9491694 | rs9506725a | rs951809  | rs9529199 | rs9538190 |
| rs946155  | rs9469913   | rs9478496 | rs9491696 | rs9506925  | rs951984  | rs9529502 | rs9538536 |
| rs9461666 | rs9469930   | rs9479    | rs9491697 | rs950716   | rs951985  | rs9529913 | rs9538557 |
| rs9461741 | rs9470004   | rs9479025 | rs9491699 | rs9507177  | rs9520222 | rs9530139 | rs9539479 |
| rs9461776 | rs9470103   | rs9479075 | rs9491891 | rs9507287  | rs9520255 | rs9530143 | rs9540294 |
| rs9461780 | rs9470264   | rs947934  | rs949214  | rs950732   | rs9520344 | rs9530279 | rs9540493 |
| rs9461793 | rs9470285   | rs9479402 | rs9492436 | rs9507791  | rs9520384 | rs9530281 | rs9540718 |
| rs946185  | rs9470298   | rs9479482 | rs949259  | rs950784   | rs9521010 | rs9530458 | rs9540720 |
| rs9461856 | rs9470361   | rs9479509 | rs9492774 | rs9508017  | rs9521011 | rs9531104 | rs9540729 |
| rs9461964 | rs9470361-A | rs9480184 | rs9492779 | rs950802   | rs9521017 | rs9531107 | rs9540731 |
| rs9461976 | rs9470366   | rs948054  | rs9493341 | rs9508026  | rs9521025 | rs9531917 | rs9541650 |
| rs9462027 | rs9470670   | rs9480594 | rs949349  | rs950843   | rs9521026 | rs9532243 | rs9541683 |
| rs9462030 | rs9470794   | rs9480610 | rs9493627 | rs9508495  | rs9521133 | rs9532434 | rs9541684 |
| rs9462031 | rs9470844   | rs9480737 | rs9494142 | rs9508759  | rs9521184 | rs9532562 | rs9541703 |
| rs9462162 | rs947088    | rs9480861 | rs9494145 | rs950880   | rs9521345 | rs9532563 | rs9542155 |
| rs9462258 | rs947091    | rs9480865 | rs9494389 | rs950881   | rs9521357 | rs9532564 | rs9542236 |
| rs9462364 | rs9471089   | rs9480866 | rs9494457 | rs9508814  | rs9521405 | rs9532580 | rs954238  |
| rs946261  | rs9471130   | rs9480889 | rs9494571 | rs950893   | rs9521510 | rs9532679 | rs954244  |
| rs9462670 | rs9471173   | rs9480924 | rs9494624 | rs950965   | rs9521601 | rs9532858 | rs9542593 |
| rs9462846 | rs9471333   | rs9481169 | rs9494840 | rs9509847  | rs9521634 | rs9532861 | rs9543012 |
| rs9463085 | rs9471669   | rs9481842 | rs9494883 | rs9509989  | rs9521678 | rs9532959 | rs9543219 |
| rs9463175 | rs9471676   | rs9482117 | rs9494892 | rs951005   | rs9521975 | rs9533031 | rs9543310 |
| rs9463511 | rs9471935   | rs9482770 | rs949527  | rs9510787  | rs9521987 | rs9533090 | rs9543325 |
| rs9463733 | rs9471972   | rs9482771 | rs9495535 | rs9511143  | rs9522180 | rs9533095 | rs9543534 |
| rs9464759 | rs9471975   | rs9482772 | rs9496306 | rs951240   | rs9522267 | rs9533096 | rs9544020 |
| rs9464760 | rs9471987   | rs9482773 | rs9496369 | rs951252   | rs952227  | rs9533100 | rs9544022 |
| rs9465253 | rs9472022   | rs9482849 | rs9496567 | rs951258   | rs952249  | rs9533118 | rs9544024 |
| rs9465509 | rs947211    | rs9483210 | rs9496623 | rs951266   | rs952275  | rs9533177 | rs9544156 |
| rs9466056 | rs9472113   | rs9483645 | rs9496638 | rs9513018  | rs952319  | rs9533425 | rs9544399 |
| rs9466161 | rs9472125   | rs9483788 | rs9496739 | rs9513112  | rs952359  | rs9533803 | rs9544436 |
| rs946711  | rs9472127   | rs948386  | rs9497026 | rs9513113  | rs9523817 | rs9533843 | rs9544444 |
| rs9467148 | rs9472135   | rs9484245 | rs9497486 | rs9513116  | rs9524568 | rs953387  | rs9544913 |
| rs9467160 | rs9472136   | rs9484829 | rs9497576 | rs9513414  | rs952471  | rs9533962 | rs9545142 |

|           |           |           |           |           |           |           |           |
|-----------|-----------|-----------|-----------|-----------|-----------|-----------|-----------|
| rs9545155 | rs9557376 | rs9571576 | rs9590390 | rs9604045 | rs9611441 | rs9624456 | rs9637973 |
| rs9545158 | rs955738  | rs957163  | rs9590403 | rs9604153 | rs9611454 | rs9624470 | rs9638084 |
| rs9545308 | rs9557386 | rs9571687 | rs9590467 | rs960428  | rs9611460 | rs962462  | rs9638182 |
| rs9545359 | rs955748  | rs9571757 | rs9590475 | rs9604573 | rs9611486 | rs962472  | rs9638227 |
| rs9545360 | rs955783  | rs9571771 | rs9590569 | rs9605049 | rs9611519 | rs9625483 | rs9638337 |
| rs9545395 | rs9558    | rs957198  | rs9590614 | rs960589  | rs9611522 | rs962554  | rs9638655 |
| rs9545421 | rs9558301 | rs9572786 | rs9590675 | rs960596  | rs9611555 | rs9625564 | rs9638713 |
| rs9545502 | rs955841  | rs9572788 | rs9590974 | rs9606138 | rs9611560 | rs9625746 | rs9638860 |
| rs9545537 | rs9558651 | rs9573092 | rs9591012 | rs9606139 | rs9611562 | rs9625935 | rs963920  |
| rs9545549 | rs9558942 | rs9573163 | rs9591137 | rs9606233 | rs9611565 | rs9626436 | rs9639594 |
| rs9546383 | rs955978  | rs9573330 | rs9591143 | rs960658  | rs9611567 | rs9626773 | rs963986  |
| rs9546434 | rs9559793 | rs9573563 | rs9591165 | rs9606618 | rs9611573 | rs9626886 | rs9639883 |
| rs954679  | rs9559901 | rs9573565 | rs9591325 | rs960667  | rs9611597 | rs9626905 | rs9639991 |
| rs9546806 | rs956006  | rs9573567 | rs9592461 | rs96067   | rs9611602 | rs9627272 | rs9640161 |
| rs9547035 | rs9560113 | rs9573569 | rs9592470 | rs9606833 | rs961183  | rs962856  | rs9640799 |
| rs954734  | rs9560114 | rs9573971 | rs9594037 | rs9606957 | rs9611881 | rs962961  | rs9641123 |
| rs954767  | rs9560417 | rs9573980 | rs9594531 | rs9606967 | rs9612003 | rs962992  | rs9641499 |
| rs9548491 | rs956096  | rs9573999 | rs9594686 | rs9606973 | rs961253  | rs962993  | rs9641509 |
| rs9548898 | rs9561331 | rs9574021 | rs9594738 | rs960709  | rs9612676 | rs9630089 | rs9641798 |
| rs9548987 | rs9561570 | rs9574095 | rs9594746 | rs9607347 | rs9613393 | rs963029  | rs964184  |
| rs9549046 | rs9561643 | rs9574450 | rs9594759 | rs9607412 | rs9613472 | rs9630449 | rs9642279 |
| rs9549153 | rs9562057 | rs957448  | rs9594770 | rs9607469 | rs9613668 | rs963059  | rs9642880 |
| rs9549238 | rs9562128 | rs9574556 | rs9595847 | rs9607566 | rs9613775 | rs9630631 | rs964293  |
| rs9549243 | rs9562854 | rs9574682 | rs9595885 | rs9607721 | rs9614090 | rs9630740 | rs9643105 |
| rs9549260 | rs9562955 | rs957512  | rs9595893 | rs9607771 | rs9614099 | rs9630873 | rs9643120 |
| rs9549297 | rs9563168 | rs9576132 | rs9595908 | rs9607782 | rs9614123 | rs9630985 | rs9643242 |
| rs9549328 | rs9563526 | rs9577174 | rs9596219 | rs9607793 | rs961414  | rs9630986 | rs9643300 |
| rs9549357 | rs9563529 | rs9577395 | rs9596300 | rs9607805 | rs9614159 | rs9632884 | rs9643888 |
| rs9549367 | rs9563574 | rs9577481 | rs9596810 | rs9607812 | rs9614460 | rs9632916 | rs9643911 |
| rs954954  | rs9563576 | rs9578178 | rs9596837 | rs9607814 | rs9614670 | rs963292  | rs9643971 |
| rs9549698 | rs9563615 | rs9578326 | rs9596863 | rs9607819 | rs9614727 | rs963327  | rs9644031 |
| rs9549753 | rs9563710 | rs9578336 | rs9597241 | rs960783  | rs9614729 | rs963349  | rs9644032 |
| rs9551428 | rs9563886 | rs9579170 | rs9597250 | rs9607868 | rs9615723 | rs9633514 | rs9644033 |
| rs9551434 | rs9564268 | rs9579574 | rs9597254 | rs9608050 | rs9616    | rs963354  | rs9644063 |
| rs9551440 | rs9564496 | rs9579583 | rs9597907 | rs9608102 | rs9616205 | rs9633643 | rs9644568 |
| rs9551468 | rs9564692 | rs9579586 | rs959894  | rs9608249 | rs9616332 | rs9633675 | rs964461  |
| rs9552416 | rs9565170 | rs957971  | rs959932  | rs9608255 | rs9616551 | rs9633835 | rs9644636 |
| rs9552597 | rs9565309 | rs9579775 | rs9599996 | rs9608491 | rs9616772 | rs9633970 | rs9644637 |
| rs9552680 | rs9565423 | rs9580438 | rs9600062 | rs9608575 | rs9616822 | rs963406  | rs9644776 |
| rs955277  | rs9565436 | rs9580924 | rs9600079 | rs9608690 | rs9616896 | rs9634162 | rs9644862 |
| rs9552911 | rs9566656 | rs9580930 | rs9600103 | rs9608698 | rs9616906 | rs9634212 | rs9645500 |
| rs9553006 | rs9566819 | rs9581297 | rs9600129 | rs9608740 | rs9616907 | rs9634277 | rs9645569 |
| rs955333  | rs9567307 | rs9581591 | rs9600143 | rs9608851 | rs9616914 | rs9634314 | rs9645660 |
| rs9553567 | rs9567393 | rs9581731 | rs9600233 | rs9608852 | rs9616947 | rs9634470 | rs9645995 |
| rs9554048 | rs9567406 | rs9581801 | rs9600235 | rs9608946 | rs961755  | rs9634489 | rs9646133 |
| rs9554186 | rs9567617 | rs9581854 | rs9600236 | rs9608972 | rs961764  | rs9634624 | rs9646167 |
| rs9554197 | rs956796  | rs9581943 | rs9600237 | rs9609178 | rs9617650 | rs9634754 | rs9646259 |
| rs9554228 | rs9568025 | rs958225  | rs9600261 | rs9609429 | rs961848  | rs9635249 | rs9646283 |
| rs9554311 | rs9568125 | rs9582259 | rs960066  | rs9609565 | rs9618670 | rs9635298 | rs9646284 |
| rs9554587 | rs9568188 | rs9583151 | rs9601116 | rs9610329 | rs9619187 | rs9635324 | rs9646401 |
| rs9555371 | rs9568402 | rs9583489 | rs9601120 | rs9610387 | rs9619658 | rs963536  | rs9646588 |
| rs9555581 | rs9568448 | rs9583546 | rs9601250 | rs9610447 | rs9620115 | rs9635726 | rs9646754 |
| rs9555596 | rs9568481 | rs9584669 | rs9601285 | rs9610458 | rs962052  | rs9635759 | rs964686  |
| rs9555695 | rs9568798 | rs9584850 | rs960192  | rs9610482 | rs9621    | rs9636107 | rs9646934 |
| rs9556    | rs9568856 | rs9584870 | rs960231  | rs9610638 | rs9621532 | rs9636121 | rs9646944 |
| rs9556403 | rs9568867 | rs9585056 | rs960246  | rs9610646 | rs962242  | rs9636146 | rs9646954 |
| rs9556404 | rs9568868 | rs9585327 | rs9602955 | rs9610647 | rs9622830 | rs9636166 | rs9647335 |
| rs9556514 | rs9568926 | rs9585348 | rs9603222 | rs9610686 | rs9623    | rs9636202 | rs9647379 |
| rs9556702 | rs9569233 | rs9586    | rs9603376 | rs9610875 | rs9623017 | rs9636259 | rs964752  |
| rs9556903 | rs9569734 | rs958650  | rs9603420 | rs9610884 | rs9623095 | rs9636303 | rs9647570 |
| rs9556958 | rs9569820 | rs958685  | rs9603422 | rs9610955 | rs9623320 | rs9636391 | rs9648027 |
| rs9557107 | rs9569823 | rs958697  | rs9603502 | rs9611014 | rs962369  | rs9636441 | rs9648346 |
| rs9557195 | rs9569968 | rs9587024 | rs9603605 | rs9611155 | rs9624216 | rs9636470 | rs9648380 |
| rs9557207 | rs9570035 | rs9587811 | rs9603612 | rs9611177 | rs9624326 | rs9637225 | rs9648716 |
| rs9557210 | rs957140  | rs958798  | rs9603616 | rs9611279 | rs9624327 | rs963740  | rs9649    |
| rs9557237 | rs9571526 | rs9588131 | rs9603618 | rs9611302 | rs9624334 | rs9637599 | rs9649187 |
| rs9557349 | rs9571548 | rs959025  | rs9603697 | rs9611310 | rs9624405 | rs9637714 | rs9649194 |

|           |           |           |           |           |           |           |           |
|-----------|-----------|-----------|-----------|-----------|-----------|-----------|-----------|
| rs9649226 | rs9663072 | rs9682919 | rs9710247 | rs9750952 | rs9787438 | rs9805939 | rs9815663 |
| rs9649366 | rs9663140 | rs9683085 | rs971074  | rs9751370 | rs9787456 | rs9806027 | rs9815756 |
| rs9649546 | rs9663333 | rs9683415 | rs971199  | rs975210  | rs9787485 | rs9806058 | rs9815874 |
| rs9649959 | rs9663362 | rs9683585 | rs971230  | rs975303  | rs9787523 | rs9806191 | rs9815974 |
| rs9650245 | rs9663421 | rs968379  | rs971290  | rs9755467 | rs9787575 | rs9806453 | rs9816029 |
| rs9650252 | rs9664044 | rs9683944 | rs9713501 | rs9756797 | rs9787810 | rs9806595 | rs9816054 |
| rs9650315 | rs9664233 | rs9683947 | rs9714159 | rs975722  | rs978807  | rs9807105 | rs9816071 |
| rs9650469 | rs966541  | rs968451  | rs971550  | rs975730  | rs9788093 | rs9807203 | rs9816226 |
| rs9650622 | rs9665626 | rs968454  | rs9715769 | rs975739  | rs9788220 | rs9807368 | rs981625  |
| rs9650650 | rs9666712 | rs9684742 | rs9715911 | rs975809  | rs9788226 | rs9807529 | rs9816588 |
| rs9650657 | rs9666728 | rs968478  | rs9716546 | rs975844  | rs9788269 | rs9807656 | rs9816652 |
| rs9650988 | rs9667108 | rs968567  | rs9716700 | rs975970  | rs9788504 | rs9807668 | rs9816720 |
| rs9651118 | rs9667150 | rs9686024 | rs9716726 | rs976002  | rs9788550 | rs9807841 | rs9816784 |
| rs9651124 | rs966751  | rs968627  | rs971681  | rs976058  | rs9788566 | rs9807908 | rs9817038 |
| rs9651367 | rs9668081 | rs9686661 | rs9717328 | rs976346  | rs9788682 | rs9807989 | rs9817394 |
| rs9651783 | rs9668337 | rs9686785 | rs9718104 | rs9763743 | rs9788714 | rs9808302 | rs9817452 |
| rs9651873 | rs9668760 | rs968698  | rs9718496 | rs9764    | rs9788721 | rs9808326 | rs981747  |
| rs9651899 | rs9668810 | rs9687065 | rs971891  | rs976560  | rs9788857 | rs9808454 | rs9817910 |
| rs9651957 | rs9669179 | rs9687749 | rs9719461 | rs9765884 | rs978888  | rs9808531 | rs9818122 |
| rs9652258 | rs9669278 | rs9687832 | rs9719620 | rs9766115 | rs978917  | rs9808651 | rs9818220 |
| rs9652437 | rs9669354 | rs9687833 | rs972142  | rs976785  | rs9789377 | rs9808753 | rs9818312 |
| rs9652490 | rs9669376 | rs9687846 | rs972283  | rs9768604 | rs9789595 | rs9808759 | rs9818550 |
| rs9652589 | rs9669571 | rs9687958 | rs972317  | rs9769088 | rs9789910 | rs980888  | rs9818707 |
| rs9652601 | rs9669605 | rs9688730 | rs972540  | rs977057  | rs978992  | rs980896  | rs9818740 |
| rs9652625 | rs9671386 | rs9688806 | rs972557  | rs9771075 | rs979012  | rs9809116 | rs9818758 |
| rs9652781 | rs9671845 | rs9689096 | rs972578  | rs9771228 | rs9790517 | rs9809213 | rs9818780 |
| rs9653111 | rs9672259 | rs9690044 | rs972761  | rs9771385 | rs9790778 | rs9809657 | rs981883  |
| rs9653332 | rs9672558 | rs9690350 | rs972762  | rs977143  | rs9791086 | rs9809852 | rs9818870 |
| rs9653442 | rs9672839 | rs9690544 | rs9728077 | rs977229  | rs9791192 | rs9810106 | rs9818964 |
| rs9654015 | rs9672995 | rs969075  | rs972936  | rs9772881 | rs9791312 | rs9810195 | rs9818981 |
| rs9654194 | rs9673065 | rs9691107 | rs9729719 | rs9773390 | rs9791721 | rs9810259 | rs9819158 |
| rs965469  | rs9673280 | rs969114  | rs972982  | rs9773443 | rs9791848 | rs981033  | rs9819362 |
| rs965513  | rs9673570 | rs9691699 | rs9733352 | rs9773950 | rs9792084 | rs9810464 | rs9819371 |
| rs9655780 | rs967367  | rs9692804 | rs9733843 | rs9775039 | rs9792269 | rs9810566 | rs9820070 |
| rs965604  | rs9673839 | rs969282  | rs973579  | rs977509  | rs9792282 | rs981057  | rs9820353 |
| rs9656060 | rs967417  | rs9692869 | rs9736016 | rs9775606 | rs979259  | rs9810888 | rs9820556 |
| rs9656169 | rs9674233 | rs9693128 | rs973605  | rs9775970 | rs9792666 | rs9811047 | rs9820604 |
| rs9656395 | rs9674439 | rs9693444 | rs973796  | rs9776097 | rs979418  | rs9811066 | rs982077  |
| rs9656588 | rs9674487 | rs9693533 | rs9738226 | rs9776186 | rs9794336 | rs9811216 | rs982085  |
| rs9656664 | rs9674544 | rs9693598 | rs9738365 | rs977747  | rs979453  | rs9811380 | rs982102  |
| rs9656929 | rs9674692 | rs9693857 | rs97384   | rs977870  | rs9795139 | rs9811546 | rs9821489 |
| rs9657541 | rs9674744 | rs9694042 | rs973879  | rs977987  | rs979532  | rs9811585 | rs9821630 |
| rs9657608 | rs9674881 | rs969512  | rs9739070 | rs9782955 | rs9795439 | rs9811674 | rs9821664 |
| rs9657746 | rs967497  | rs969518  | rs9739640 | rs978297  | rs9795476 | rs9811759 | rs9821797 |
| rs9657904 | rs9675120 | rs9696009 | rs9739706 | rs9783086 | rs9796    | rs9811850 | rs9822268 |
| rs965808  | rs9675122 | rs9696028 | rs9742    | rs9783701 | rs9796795 | rs9811910 | rs9822731 |
| rs9658111 | rs9675612 | rs969650  | rs974295  | rs9783782 | rs9797233 | rs9811920 | rs9822953 |
| rs9658134 | rs967569  | rs9697210 | rs9743723 | rs9783783 | rs9797244 | rs9812100 | rs9823123 |
| rs9658584 | rs9675944 | rs9697691 | rs9743908 | rs9783786 | rs9797854 | rs981230  | rs9823161 |
| rs9658667 | rs9675998 | rs9700528 | rs974455  | rs9784123 | rs9797861 | rs9812461 | rs9823346 |
| rs9658688 | rs967645  | rs9701457 | rs974471  | rs9784137 | rs9797885 | rs9813064 | rs9823527 |
| rs9659328 | rs9676912 | rs9702209 | rs974552  | rs978444  | rs9798015 | rs9813107 | rs9823696 |
| rs9659380 | rs9677504 | rs970223  | rs9745545 | rs9784689 | rs979812  | rs9813198 | rs9823829 |
| rs9659978 | rs9677594 | rs970361  | rs97458   | rs9784704 | rs980014  | rs981320  | rs9824196 |
| rs9660992 | rs9678281 | rs9704108 | rs974711  | rs9784725 | rs9800506 | rs9813229 | rs9824251 |
| rs9661050 | rs9678859 | rs970468  | rs9747347 | rs9784858 | rs9801017 | rs9813363 | rs9824877 |
| rs9661140 | rs9679319 | rs970498  | rs9747839 | rs9785133 | rs9801230 | rs9813495 | rs9825207 |
| rs9661353 | rs9680365 | rs970548  | rs974819  | rs9785465 | rs9801416 | rs9813513 | rs982521  |
| rs9661500 | rs968050  | rs9705901 | rs9749111 | rs9786153 | rs9801466 | rs9814480 | rs9825346 |
| rs9661687 | rs9680696 | rs970649  | rs9749262 | rs9786986 | rs980183  | rs9814758 | rs9825379 |
| rs9661787 | rs9680823 | rs970797  | rs9749440 | rs9787073 | rs9803723 | rs9814893 | rs9825383 |
| rs9661802 | rs9681156 | rs9708177 | rs9749453 | rs9787076 | rs9803999 | rs9814945 | rs9825420 |
| rs966221  | rs9681162 | rs970821  | rs9749546 | rs9787132 | rs9804265 | rs9815073 | rs9825431 |
| rs9662255 | rs9681954 | rs9708919 | rs9749556 | rs9787133 | rs9804550 | rs9815332 | rs9825772 |
| rs9662392 | rs9682036 | rs970908  | rs9749589 | rs9787249 | rs9804646 | rs9815334 | rs9825822 |
| rs9662662 | rs9682041 | rs9709216 | rs975025  | rs978740  | rs9805009 | rs9815354 | rs9825823 |
| rs9662870 | rs968267  | rs970987  | rs9750717 | rs9787409 | rs9805893 | rs9815484 | rs9825906 |

|           |           |           |           |           |             |           |           |
|-----------|-----------|-----------|-----------|-----------|-------------|-----------|-----------|
| rs9825958 | rs9832740 | rs9841504 | rs9851257 | rs9859042 | rs9867068   | rs9876650 | rs9887774 |
| rs9826367 | rs9832813 | rs9841616 | rs9851301 | rs9859058 | rs9867121   | rs9876664 | rs9887775 |
| rs9826413 | rs9832919 | rs9841807 | rs9851441 | rs9859077 | rs986714    | rs9876710 | rs9887799 |
| rs9826470 | rs9833309 | rs984181  | rs9851577 | rs9859176 | rs986721    | rs9876864 | rs9888193 |
| rs9826551 | rs9833318 | rs9841829 | rs9851710 | rs9859260 | rs9867227   | rs9877137 | rs9888248 |
| rs9826775 | rs9833313 | rs9841897 | rs9851724 | rs9859381 | rs986732    | rs9877225 | rs9888363 |
| rs9826828 | rs9833388 | rs9841945 | rs9852062 | rs9859406 | rs9867398   | rs9877235 | rs9888533 |
| rs9826951 | rs9833415 | rs9841975 | rs9852127 | rs9859556 | rs9867678   | rs9877304 | rs9888615 |
| rs9826959 | rs9833533 | rs9841978 | rs9852406 | rs9859557 | rs9867802   | rs9877408 | rs988867  |
| rs9826984 | rs9833888 | rs9842133 | rs9852417 | rs9859562 | rs9868075   | rs9877493 | rs9888739 |
| rs98270   | rs9833392 | rs9842137 | rs9852465 | rs9859616 | rs9868185   | rs9877502 | rs9888796 |
| rs9827472 | rs983402  | rs984222  | rs9852529 | rs9859787 | rs9868355   | rs987773  | rs9888858 |
| rs982764  | rs9834125 | rs9842222 | rs985256  | rs9860250 | rs9868582   | rs9877891 | rs9888986 |
| rs9827694 | rs9834246 | rs984225  | rs9852647 | rs9860290 | rs9868809   | rs9877910 | rs988913  |
| rs9827892 | rs9834250 | rs9842349 | rs9852648 | rs9860326 | rs986912    | rs9878451 | rs9889262 |
| rs9827968 | rs9834503 | rs9842371 | rs9852859 | rs9860547 | rs9869477   | rs9878536 | rs9889282 |
| rs9828009 | rs9834519 | rs9842562 | rs9852867 | rs9860660 | rs9869493   | rs9878602 | rs9889296 |
| rs982804  | rs9834560 | rs9842735 | rs9852988 | rs9860730 | rs9869574   | rs987870  | rs988957  |
| rs9828061 | rs9834564 | rs984283  | rs9853018 | rs9860931 | rs9869826   | rs9878767 | rs988958  |
| rs9828223 | rs9834661 | rs9842947 | rs9853113 | rs9861009 | rs9870260   | rs9878908 | rs9889827 |
| rs9828592 | rs9834692 | rs984306  | rs9853115 | rs9861033 | rs9870317   | rs9879090 | rs9889953 |
| rs9828595 | rs983473  | rs9843102 | rs9853258 | rs9861140 | rs9870322   | rs9879264 | rs9890032 |
| rs9828629 | rs9834932 | rs9843340 | rs9853563 | rs9861237 | rs9870377   | rs9879311 | rs9890128 |
| rs9828679 | rs983494  | rs9843355 | rs9853714 | rs9861426 | rs9870384   | rs987949  | rs9890200 |
| rs9828771 | rs9834970 | rs9843653 | rs9853827 | rs9861443 | rs987044    | rs9879531 | rs989075  |
| rs9828772 | rs9834975 | rs9843728 | rs9853928 | rs9861454 | rs9870448   | rs9879628 | rs9891111 |
| rs9828823 | rs9835073 | rs9843801 | rs9853960 | rs9861774 | rs9870575   | rs9879667 | rs9891119 |
| rs9828976 | rs9835157 | rs984409  | rs9854669 | rs9861816 | rs987068    | rs9880192 | rs9891146 |
| rs982903  | rs9835332 | rs9844666 | rs9854769 | rs9862291 | rs987071    | rs9880211 | rs989128  |
| rs9829032 | rs983545  | rs9844755 | rs9854771 | rs9862416 | rs9870741   | rs9880418 | rs9891340 |
| rs9829061 | rs9835571 | rs9844948 | rs9854823 | rs9862438 | rs987107    | rs9880522 | rs9891699 |
| rs9829114 | rs9835765 | rs9844972 | rs9854869 | rs9862599 | rs9871203   | rs9880772 | rs9891739 |
| rs9829436 | rs983583  | rs9845075 | rs9855086 | rs9862795 | rs987121    | rs988100  | rs9891920 |
| rs982948  | rs9836178 | rs9845120 | rs985546  | rs9862842 | rs987166    | rs9881096 | rs9891968 |
| rs9829746 | rs9836291 | rs9845387 | rs985552  | rs9863    | rs987189531 | rs9881400 | rs9892152 |
| rs9829778 | rs9836368 | rs9845655 | rs9855788 | rs9863496 | rs9872004   | rs9881533 | rs9892407 |
| rs9829896 | rs9836431 | rs9845741 | rs9855896 | rs986358  | rs9872023   | rs9881798 | rs9892466 |
| rs9830029 | rs9836621 | rs984586  | rs9856011 | rs9863706 | rs9872031   | rs9882532 | rs9892586 |
| rs9830049 | rs9836970 | rs9846232 | rs9856118 | rs9863753 | rs9872035   | rs988257  | rs9892651 |
| rs9830173 | rs9837162 | rs9846246 | rs9856289 | rs9863836 | rs9872276   | rs9882772 | rs9892728 |
| rs983034  | rs9837325 | rs9846396 | rs9856337 | rs986391  | rs9872347   | rs9883204 | rs9892893 |
| rs9830342 | rs9837462 | rs9846711 | rs9856387 | rs9864010 | rs987237    | rs9883252 | rs9892942 |
| rs9830359 | rs9837520 | rs9847178 | rs9856633 | rs9864031 | rs9872440   | rs9883474 | rs9893132 |
| rs9830388 | rs9837602 | rs9847240 | rs9856702 | rs986413  | rs9872570   | rs9883498 | rs9893173 |
| rs9830592 | rs9837654 | rs9847248 | rs9856718 | rs986417  | rs9872754   | rs9883756 | rs9893690 |
| rs9830664 | rs9837772 | rs9847377 | rs985676  | rs9864170 | rs9872857   | rs9883788 | rs9893691 |
| rs983067  | rs9838144 | rs9847631 | rs9856782 | rs9864672 | rs9872864   | rs9883813 | rs9893756 |
| rs9831002 | rs9838230 | rs9847710 | rs9856990 | rs986475  | rs9872999   | rs988397  | rs989393  |
| rs9831084 | rs983825  | rs9848203 | rs9857204 | rs9864898 | rs9873175   | rs988398  | rs9894220 |
| rs9831278 | rs9838430 | rs9848655 | rs9857362 | rs9864951 | rs9873179   | rs9884090 | rs9894429 |
| rs9831410 | rs9838450 | rs984877  | rs9857592 | rs9865051 | rs9873478   | rs9884390 | rs9894577 |
| rs9831488 | rs9838517 | rs9849126 | rs9857883 | rs986506  | rs9873519   | rs9884482 | rs9894591 |
| rs9831543 | rs9838540 | rs9849248 | rs9857914 | rs986512  | rs9873544   | rs9885207 | rs9894634 |
| rs9831658 | rs9838703 | rs9849301 | rs9857970 | rs9865337 | rs9873580   | rs9885413 | rs9894946 |
| rs9831663 | rs9838792 | rs9849338 | rs9858038 | rs986564  | rs9873618   | rs9885489 | rs989501  |
| rs9831861 | rs9839267 | rs9849502 | rs9858059 | rs9865713 | rs9874207   | rs9885526 | rs9895032 |
| rs9831873 | rs9839653 | rs984971  | rs9858071 | rs9865818 | rs9874537   | rs9885577 | rs9895199 |
| rs9832037 | rs9840391 | rs9849756 | rs9858213 | rs9865843 | rs9874540   | rs9885632 | rs9895291 |
| rs9832119 | rs9840468 | rs984976  | rs9858244 | rs9865980 | rs987455    | rs9885896 | rs9895419 |
| rs9832169 | rs9840684 | rs984983  | rs9858271 | rs9866054 | rs9874646   | rs9886239 | rs9895429 |
| rs9832234 | rs9840812 | rs9849884 | rs9858297 | rs9866086 | rs987525    | rs9886651 | rs9895436 |
| rs9832291 | rs9840967 | rs9850274 | rs9858428 | rs9866123 | rs9875380   | rs9886665 | rs9895443 |
| rs983233  | rs9841212 | rs9850597 | rs9858503 | rs9866168 | rs9875381   | rs9886703 | rs9895448 |
| rs9832402 | rs9841280 | rs985060  | rs9858542 | rs9866391 | rs9875516   | rs9886870 | rs9895661 |
| rs9832454 | rs9841287 | rs9850626 | rs9858921 | rs9866470 | rs9875617   | rs988712  | rs9895848 |
| rs9832502 | rs9841382 | rs9850919 | rs9858954 | rs986649  | rs9876105   | rs988748  | rs9896243 |
| rs9832727 | rs9841435 | rs9851068 | rs9859018 | rs9866679 | rs9876201   | rs9887672 | rs9896306 |



|           |           |             |           |           |           |           |           |
|-----------|-----------|-------------|-----------|-----------|-----------|-----------|-----------|
| rs9896320 | rs9904468 | rs9910727   | rs9919670 | rs9929993 | rs9938160 | rs9949444 | rs9964724 |
| rs9896363 | rs9904601 | rs9910745   | rs9920    | rs9930005 | rs9938394 | rs9949494 | rs9964831 |
| rs9896535 | rs9904639 | rs9910950   | rs992005  | rs9930139 | rs993845  | rs9949617 | rs9965170 |
| rs989657  | rs9904699 | rs9911033   | rs9920185 | rs9930242 | rs9938550 | rs995000  | rs9965539 |
| rs9896573 | rs9904753 | rs9911144   | rs9920704 | rs9930333 | rs993884  | rs9950000 | rs9965695 |
| rs9896673 | rs9904768 | rs9911155   | rs9921192 | rs9930506 | rs993885  | rs995030  | rs9966005 |
| rs9896933 | rs9904970 | rs9911167   | rs9921222 | rs9931050 | rs9939124 | rs9950528 | rs9966170 |
| rs9896963 | rs9905106 | rs9911460   | rs9921295 | rs9931153 | rs9939224 | rs9951002 | rs9966612 |
| rs9897348 | rs9905182 | rs9911515   | rs9921412 | rs9931242 | rs993925  | rs9951109 | rs9966832 |
| rs9897794 | rs990526  | rs9911533   | rs992157  | rs9931440 | rs9939347 | rs9951150 | rs9966951 |
| rs9898    | rs9905274 | rs9911578   | rs9921634 | rs9931543 | rs9939427 | rs9951447 | rs9967110 |
| rs9898002 | rs990529  | rs9911634   | rs9921758 | rs9931702 | rs9939609 | rs9951698 | rs9967367 |
| rs9898091 | rs9905308 | rs9911652   | rs9922085 | rs9931938 | rs9939768 | rs9951893 | rs9967405 |
| rs9898189 | rs9905388 | rs9911791   | rs9922110 | rs9931989 | rs9939774 | rs9952111 | rs9967417 |
| rs9898390 | rs9905515 | rs991191    | rs9922277 | rs9932027 | rs9939914 | rs9952412 | rs9967747 |
| rs9898480 | rs9905543 | rs9911991   | rs9922288 | rs9932087 | rs9939973 | rs9952522 | rs9967780 |
| rs989885  | rs9905704 | rs9912236   | rs9922570 | rs9932186 | rs994004  | rs995258  | rs9967792 |
| rs9899069 | rs9905786 | rs9912305   | rs9922596 | rs9932196 | rs9940109 | rs9952639 | rs9967799 |
| rs9899183 | rs990579  | rs9912317   | rs9922607 | rs9932220 | rs9940128 | rs9952641 | rs9967813 |
| rs9899375 | rs9905793 | rs9912362   | rs9922678 | rs993226  | rs994014  | rs9952962 | rs9967849 |
| rs9899540 | rs9906044 | rs9912468   | rs9922708 | rs9932312 | rs9940149 | rs9952980 | rs9968137 |
| rs9899728 | rs9906105 | rs9912468-G | rs9923231 | rs9932605 | rs9940317 | rs9953366 | rs9968300 |
| rs989978  | rs9906189 | rs9912487   | rs9923283 | rs9932625 | rs9940346 | rs9953924 | rs9968377 |
| rs9899833 | rs990619  | rs9912530   | rs9923544 | rs9932690 | rs9940480 | rs9953955 | rs9968554 |
| rs9900062 | rs9906289 | rs9912553   | rs9923575 | rs993284  | rs9940555 | rs9954058 | rs996865  |
| rs9900074 | rs9906320 | rs9912738   | rs9923732 | rs9932866 | rs9940899 | rs9954741 | rs9968815 |
| rs9900280 | rs9906564 | rs9913156   | rs9923854 | rs9932957 | rs9940970 | rs9954838 | rs9968910 |
| rs9900387 | rs9906577 | rs9913225   | rs9924031 | rs9933071 | rs9940975 | rs9955190 | rs9969232 |
| rs9900496 | rs9906651 | rs9913470   | rs9924506 | rs9933149 | rs9941217 | rs9955276 | rs9969423 |
| rs9900555 | rs9906695 | rs9913711   | rs9924561 | rs9933256 | rs9941239 | rs9955853 | rs9969436 |
| rs9900613 | rs9906944 | rs9913911   | rs9924886 | rs9933309 | rs9941245 | rs9955954 | rs9969524 |
| rs9900684 | rs9906951 | rs9913973   | rs992493  | rs9933476 | rs9941349 | rs9956387 | rs9969563 |
| rs9900761 | rs9906974 | rs9914258   | rs9924983 | rs9933582 | rs9941963 | rs9956644 | rs9969668 |
| rs9900933 | rs9907033 | rs9914367   | rs9925477 | rs9933638 | rs9942009 | rs995698  | rs9969748 |
| rs9900967 | rs9907214 | rs9914426   | rs9925497 | rs9933767 | rs9942416 | rs9957145 | rs9969804 |
| rs9901146 | rs9907229 | rs9914578   | rs9925837 | rs993380  | rs994270  | rs9957264 | rs9970140 |
| rs9901257 | rs9907379 | rs9914988   | rs9925964 | rs9933881 | rs9943    | rs9957365 | rs9970167 |
| rs9901287 | rs9907571 | rs9915021   | rs9926137 | rs9934011 | rs994308  | rs9957425 | rs9970286 |
| rs9901392 | rs9907690 | rs9915112   | rs9926289 | rs9934041 | rs9943081 | rs9957512 | rs9970334 |
| rs9901434 | rs9907978 | rs9915190   | rs9926296 | rs993419  | rs9943291 | rs995758  | rs9970807 |
| rs9901521 | rs9907984 | rs9915296   | rs9926320 | rs9934328 | rs9943566 | rs9957921 | rs9970896 |
| rs9901595 | rs9908017 | rs9915356   | rs9926388 | rs9934579 | rs9943599 | rs9958145 | rs997091  |
| rs9901627 | rs9908045 | rs9915489   | rs9926463 | rs993459  | rs9943753 | rs9958640 | rs9971210 |
| rs990171  | rs9908158 | rs9915645   | rs9926609 | rs993466  | rs9943778 | rs9958656 | rs9971406 |
| rs9901810 | rs9908167 | rs9915657   | rs9926649 | rs993471  | rs9944241 | rs9958734 | rs997154  |
| rs9901869 | rs9908283 | rs9915692   | rs9926664 | rs9934930 | rs9944243 | rs9958919 | rs9971729 |
| rs9901901 | rs9908318 | rs9915731   | rs9927049 | rs9935652 | rs9944249 | rs9959145 | rs9971845 |
| rs990211  | rs9908330 | rs9915940   | rs9927123 | rs9935770 | rs9944275 | rs9959497 | rs9971907 |
| rs9902260 | rs9908473 | rs991628    | rs9927137 | rs9935836 | rs9944445 | rs9959574 | rs9972050 |
| rs9902312 | rs990871  | rs9916302   | rs9927293 | rs9935845 | rs9944545 | rs9959832 | rs9972151 |
| rs9902358 | rs9908756 | rs9916351   | rs9927295 | rs9936170 | rs9944715 | rs996064  | rs9972293 |
| rs9902384 | rs9908765 | rs9916458   | rs9927316 | rs9936260 | rs9944807 | rs9960767 | rs9972363 |
| rs9902453 | rs9909004 | rs9916613   | rs9927389 | rs9936385 | rs9945126 | rs9960807 | rs9972635 |
| rs9902512 | rs9909240 | rs9916877   | rs9927527 | rs9936459 | rs9945304 | rs9961091 | rs9972653 |
| rs9902820 | rs9909247 | rs9916901   | rs9927842 | rs9936784 | rs994532  | rs9961653 | rs9972727 |
| rs9902847 | rs9909342 | rs9916942   | rs9928015 | rs9936833 | rs994533  | rs9962650 | rs9972791 |
| rs9903158 | rs9909443 | rs9916978   | rs9928094 | rs9937053 | rs9946342 | rs9962915 | rs997283  |
| rs9903269 | rs9909465 | rs9917425   | rs9928663 | rs9937170 | rs9946771 | rs9963612 | rs9972882 |
| rs9903801 | rs9909593 | rs9917457   | rs9929143 | rs9937293 | rs9947269 | rs9963625 | rs9972911 |
| rs9903973 | rs9909628 | rs9917656   | rs9929218 | rs9937296 | rs994729  | rs9963878 | rs9972936 |
| rs9903991 | rs9909922 | rs9917946   | rs9929242 | rs9937309 | rs994767  | rs9963938 | rs9972944 |
| rs9904004 | rs9910055 | rs9918110   | rs9929556 | rs993744  | rs9947743 | rs9964220 | rs997295  |
| rs9904067 | rs991014  | rs9918259   | rs992969  | rs9937449 | rs9948057 | rs9964229 | rs9973109 |
| rs9904177 | rs9910148 | rs991871    | rs9929762 | rs9937664 | rs9948462 | rs9964304 | rs9973361 |
| rs9904288 | rs9910365 | rs9919526   | rs9929792 | rs9937709 | rs9948878 | rs9964420 | rs997368  |
| rs9904290 | rs991057  | rs9919557   | rs9929885 | rs9937943 | rs9949052 | rs9964524 | rs997386  |
| rs9904409 | rs9910589 | rs991967    | rs9929977 | rs9938149 | rs9949291 | rs9964638 | rs9973919 |

## Supplemental Online Material

|           |           |           |           |           |           |           |           |
|-----------|-----------|-----------|-----------|-----------|-----------|-----------|-----------|
| rs9973932 | rs9976767 | rs997999  | rs9985766 | rs9988571 | rs9990220 | rs9992915 | rs9995821 |
| rs997413  | rs9976812 | rs9980    | rs998584  | rs9988620 | rs999033  | rs9993023 | rs9995997 |
| rs9974172 | rs997683  | rs9980072 | rs9985922 | rs9988642 | rs9990333 | rs9993475 | rs9996608 |
| rs9974178 | rs9976841 | rs9980311 | rs998616  | rs9988687 | rs9991259 | rs9993613 | rs999675  |
| rs9974320 | rs9976876 | rs998102  | rs9986272 | rs998884  | rs9991278 | rs9993633 | rs9997185 |
| rs9974367 | rs9977018 | rs9981624 | rs9986829 | rs9989002 | rs9991328 | rs9993636 | rs999737  |
| rs9974653 | rs9977276 | rs998203  | rs998683  | rs998908  | rs9991479 | rs9994216 | rs9997394 |
| rs997482  | rs9977306 | rs998230  | rs9986877 | rs9989141 | rs9991501 | rs9994626 | rs9997790 |
| rs9974899 | rs9977672 | rs9982334 | rs9986945 | rs9989163 | rs9991510 | rs9994759 | rs9998015 |
| rs9974927 | rs9977825 | rs9982370 | rs9987289 | rs9989230 | rs9991779 | rs999483  | rs9998041 |
| rs9975024 | rs9977881 | rs998245  | rs998731  | rs9989237 | rs9991917 | rs9994887 | rs999885  |
| rs9975238 | rs99780   | rs9982601 | rs998732  | rs9989410 | rs9992013 | rs999494  | rs9999331 |
| rs9975345 | rs9978142 | rs9982895 | rs9987353 | rs9989419 | rs9992101 | rs999522  |           |
| rs9975780 | rs9978405 | rs9983113 | rs9987376 | rs9989466 | rs9992616 | rs9995319 |           |
| rs9976042 | rs9978563 | rs998394  | rs998749  | rs9989479 | rs9992667 | rs9995419 |           |
| rs9976326 | rs997907  | rs998447  | rs9987548 | rs9989735 | rs9992704 | rs999556  |           |
| rs9976596 | rs997934  | rs9984655 | rs9988    | rs999010  | rs9992763 | rs9995627 |           |
| rs9976628 | rs9979383 | rs9985315 | rs9988450 | rs9990215 | rs9992793 | rs9995716 |           |

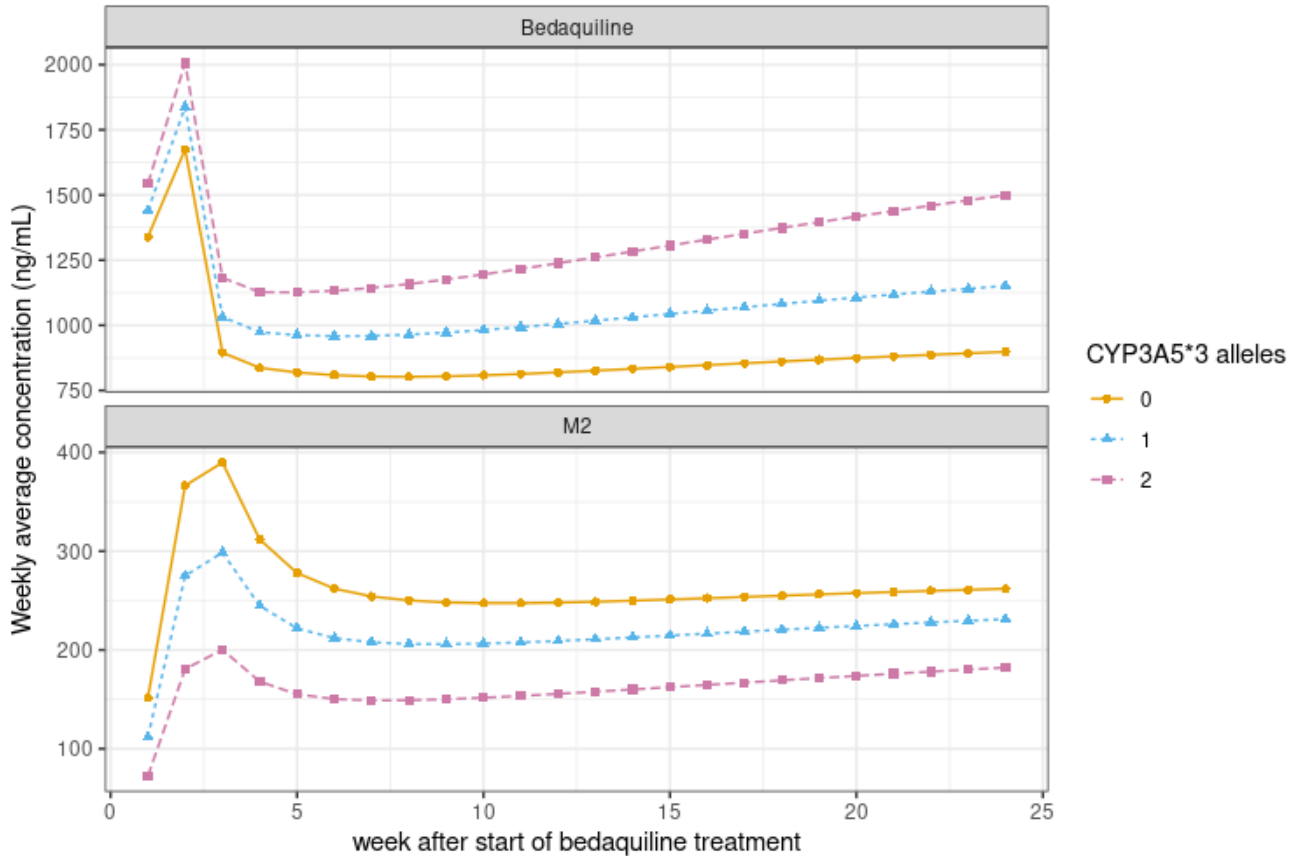

Figure 1. Typical weekly average concentrations of bedaquiline and metabolite M2 over time by number of CYP3A5\*3 alleles. The weekly average concentrations were predicted for a typical virtual patient with 0, 1 or 2 CYP3A5\*3 alleles using the pharmacokinetic model without random effects. The virtual patient was 32 years of age and the baseline weight (56.6 kg) and albumin (3.6 g/dL) had a typical increase over treatment time. The bedaquiline dosing regimen was 400 mg daily for 2 weeks followed by 22 weeks of 200 mg 3 times per week. Weekly average concentrations were calculated from the weekly area under the concentration-time curve.
